# Supplementary material for: Synthesis of C 70 -fragment buckybowls bearing alkoxy substituents
Source: publisher site journal article supplement (doi:10.3762/bjoc.16.66), 2020-04-15

# checkCIF/PLATON report

Structure factors have been supplied for datablock(s) Dioxole5c

THIS REPORT IS FOR GUIDANCE ONLY. IF USED AS PART OF A REVIEW PROCEDURE FOR PUBLICATION, IT SHOULD NOT REPLACE THE EXPERTISE OF AN EXPERIENCED CRYSTALLOGRAPHIC REFEREE.

No syntax errors found.      CIF dictionary      Interpreting this report

## Datablock: Dioxole5c

---

Bond precision:    C-C = 0.0084 Å                      Wavelength=0.71073

Cell:                      a=17.274(4)              b=7.4408(15)              c=27.913(6)  
                            alpha=90              beta=100.62(3)              gamma=90

Temperature:            150 K

|                | Calculated  | Reported    |
|----------------|-------------|-------------|
| Volume         | 3526.3(14)  | 3526.2(13)  |
| Space group    | P 21/c      | P 1 21/c 1  |
| Hall group     | -P 2ybc     | -P 2ybc     |
| Moiety formula | C29 H14 O2  | C29 H14 O2  |
| Sum formula    | C29 H14 O2  | C29 H14 O2  |
| Mr             | 394.40      | 394.40      |
| Dx,g cm-3      | 1.486       | 1.486       |
| Z              | 8           | 8           |
| Mu (mm-1)      | 0.092       | 0.092       |
| F000           | 1632.0      | 1632.0      |
| F000'          | 1632.73     |             |
| h,k,lmax       | 22,9,36     | 22,9,35     |
| Nref           | 8104        | 7995        |
| Tmin,Tmax      | 0.997,0.997 | 0.544,1.000 |
| Tmin'          | 0.984       |             |

Correction method= # Reported T Limits: Tmin=0.544 Tmax=1.000  
AbsCorr = MULTI-SCAN

Data completeness= 0.987                      Theta(max)= 27.485

R(reflections)= 0.1217( 2351)              wR2(reflections)= 0.2096( 7995)

S = 1.000                      Npar= 559

---

The following ALERTS were generated. Each ALERT has the format

**test-name\_ALERT\_alert-type\_alert-level.**

Click on the hyperlinks for more details of the test.

---

### Alert level A

PLAT026\_ALERT\_3\_A Ratio Observed / Unique Reflections (too) Low .. 29% Check

---

### Alert level B

RINTA01\_ALERT\_3\_B The value of Rint is greater than 0.18

Rint given 0.188

PLAT020\_ALERT\_3\_B The Value of Rint is Greater Than 0.12 ..... 0.188 Report

PLAT230\_ALERT\_2\_B Hirshfeld Test Diff for C23 --C28 . 7.4 s.u.

---

### Alert level C

ABSTY02\_ALERT\_1\_C An \_exptl\_absorpt\_correction\_type has been given without  
a literature citation. This should be contained in the  
\_exptl\_absorpt\_process\_details field.

Absorption correction given as multi-scan

PLAT082\_ALERT\_2\_C High R1 Value ..... 0.12 Report

PLAT230\_ALERT\_2\_C Hirshfeld Test Diff for O2 --C27 . 5.6 s.u.

PLAT230\_ALERT\_2\_C Hirshfeld Test Diff for C3 --C14 . 5.8 s.u.

PLAT230\_ALERT\_2\_C Hirshfeld Test Diff for C10 --C11 . 5.6 s.u.

PLAT230\_ALERT\_2\_C Hirshfeld Test Diff for C55 --C56 . 5.3 s.u.

PLAT234\_ALERT\_4\_C Large Hirshfeld Difference C39 --C40 . 0.17 Ang.

PLAT234\_ALERT\_4\_C Large Hirshfeld Difference C43 --C44 . 0.16 Ang.

PLAT234\_ALERT\_4\_C Large Hirshfeld Difference C45 --C46 . 0.16 Ang.

PLAT234\_ALERT\_4\_C Large Hirshfeld Difference C46 --C47 . 0.18 Ang.

PLAT234\_ALERT\_4\_C Large Hirshfeld Difference C52 --C57 . 0.16 Ang.

PLAT241\_ALERT\_2\_C High MainMol Ueq as Compared to Neighbors of O4 Check

PLAT340\_ALERT\_3\_C Low Bond Precision on C-C Bonds ..... 0.00843 Ang.

PLAT906\_ALERT\_3\_C Large K Value in the Analysis of Variance ..... 131.081 Check

PLAT906\_ALERT\_3\_C Large K Value in the Analysis of Variance ..... 3.001 Check

PLAT906\_ALERT\_3\_C Large K Value in the Analysis of Variance ..... 21.787 Check

PLAT906\_ALERT\_3\_C Large K Value in the Analysis of Variance ..... 2.828 Check

PLAT906\_ALERT\_3\_C Large K Value in the Analysis of Variance ..... 7.194 Check

PLAT906\_ALERT\_3\_C Large K Value in the Analysis of Variance ..... 2.551 Check

PLAT906\_ALERT\_3\_C Large K Value in the Analysis of Variance ..... 3.764 Check

PLAT906\_ALERT\_3\_C Large K Value in the Analysis of Variance ..... 2.453 Check

PLAT910\_ALERT\_3\_C Missing # of FCF Reflection(s) Below Theta(Min). 10 Note

PLAT911\_ALERT\_3\_C Missing FCF Refl Between Thmin & STh/L= 0.600 32 Report

PLAT978\_ALERT\_2\_C Number C-C Bonds with Positive Residual Density. 0 Info

---

### Alert level G

PLAT003\_ALERT\_2\_G Number of Uiso or Uij Restrained non-H Atoms ... 6 Report

PLAT012\_ALERT\_1\_G No \_shelx\_res\_checksum Found in CIF ..... Please Check

PLAT177\_ALERT\_4\_G The CIF-Embedded .res File Contains DELU Records 1 Report

PLAT178\_ALERT\_4\_G The CIF-Embedded .res File Contains SIMU Records 1 Report

PLAT187\_ALERT\_4\_G The CIF-Embedded .res File Contains RIGU Records 1 Report

PLAT398\_ALERT\_2\_G Deviating C-O-C Angle From 120 for O1 103.5 Degree

PLAT398\_ALERT\_2\_G Deviating C-O-C Angle From 120 for O2 105.2 Degree

PLAT398\_ALERT\_2\_G Deviating C-O-C Angle From 120 for O3 105.8 Degree

PLAT398\_ALERT\_2\_G Deviating C-O-C Angle From 120 for O4 106.4 Degree

PLAT860\_ALERT\_3\_G Number of Least-Squares Restraints ..... 51 Note

PLAT883\_ALERT\_1\_G No Info/Value for \_atom\_sites\_solution\_primary . Please Do !

PLAT912\_ALERT\_4\_G Missing # of FCF Reflections Above STh/L= 0.600 59 Note

---

- 1 **ALERT level A** = Most likely a serious problem - resolve or explain
- 3 **ALERT level B** = A potentially serious problem, consider carefully
- 24 **ALERT level C** = Check. Ensure it is not caused by an omission or oversight
- 12 **ALERT level G** = General information/check it is not something unexpected

3 ALERT type 1 CIF construction/syntax error, inconsistent or missing data  
13 ALERT type 2 Indicator that the structure model may be wrong or deficient  
15 ALERT type 3 Indicator that the structure quality may be low  
9 ALERT type 4 Improvement, methodology, query or suggestion  
0 ALERT type 5 Informative message, check

---

It is advisable to attempt to resolve as many as possible of the alerts in all categories. Often the minor alerts point to easily fixed oversights, errors and omissions in your CIF or refinement strategy, so attention to these fine details can be worthwhile. In order to resolve some of the more serious problems it may be necessary to carry out additional measurements or structure refinements. However, the purpose of your study may justify the reported deviations and the more serious of these should normally be commented upon in the discussion or experimental section of a paper or in the "special\_details" fields of the CIF. checkCIF was carefully designed to identify outliers and unusual parameters, but every test has its limitations and alerts that are not important in a particular case may appear. Conversely, the absence of alerts does not guarantee there are no aspects of the results needing attention. It is up to the individual to critically assess their own results and, if necessary, seek expert advice.

### **Publication of your CIF in IUCr journals**

A basic structural check has been run on your CIF. These basic checks will be run on all CIFs submitted for publication in IUCr journals (*Acta Crystallographica*, *Journal of Applied Crystallography*, *Journal of Synchrotron Radiation*); however, if you intend to submit to *Acta Crystallographica Section C* or *E* or *IUCrData*, you should make sure that full publication checks are run on the final version of your CIF prior to submission.

### **Publication of your CIF in other journals**

Please refer to the *Notes for Authors* of the relevant journal for any special instructions relating to CIF submission.

---

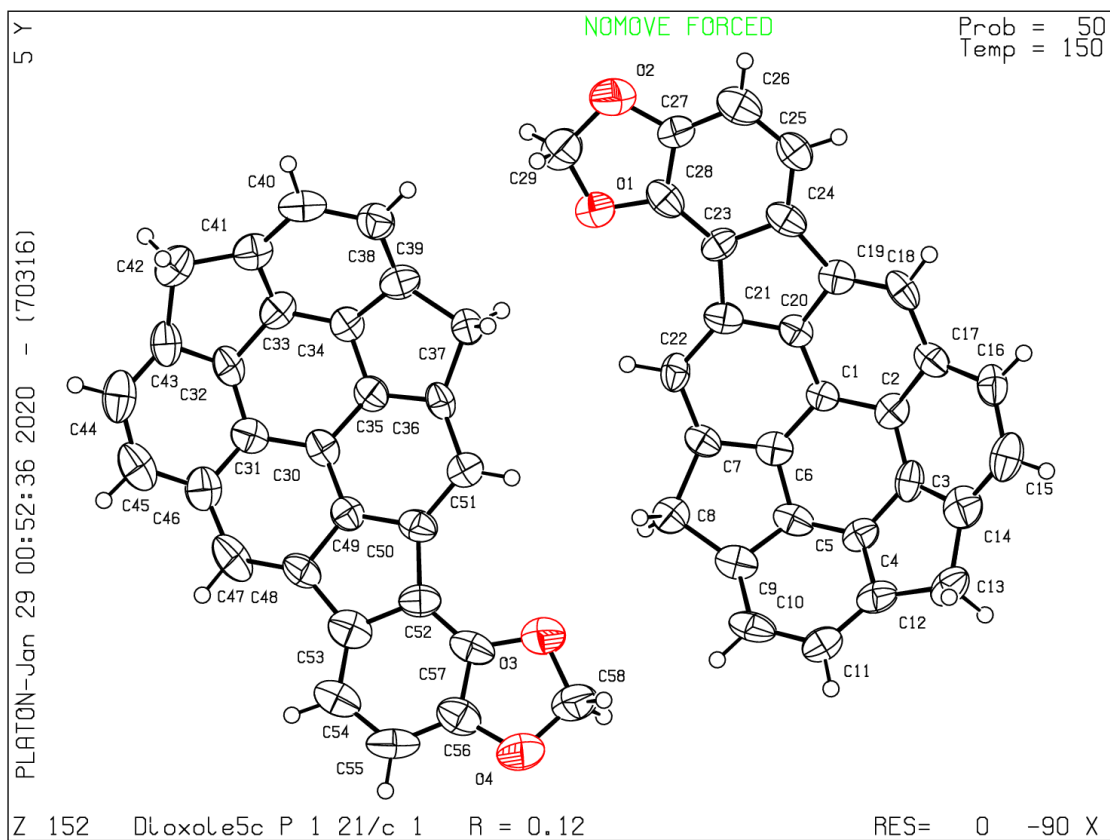

Supplement: Additional file 1 [file 1860-5397-16-66-S1.zip]
