# Supplementary material for: Synthesis of C 70 -fragment buckybowls bearing alkoxy substituents
Source: publisher site journal article supplement (doi:10.3762/bjoc.16.66), 2020-04-15

# checkCIF/PLATON report

Structure factors have been supplied for datablock(s) Dimethoxy5a

THIS REPORT IS FOR GUIDANCE ONLY. IF USED AS PART OF A REVIEW PROCEDURE FOR PUBLICATION, IT SHOULD NOT REPLACE THE EXPERTISE OF AN EXPERIENCED CRYSTALLOGRAPHIC REFEREE.

No syntax errors found.      CIF dictionary      Interpreting this report

## Datablock: Dimethoxy5a

---

Bond precision:    C-C = 0.0127 Å                      Wavelength=0.71073

Cell:                      a=17.382(4)              b=7.2895(15)              c=28.978(6)  
                            alpha=90              beta=90              gamma=90  
Temperature:              150 K

|                | Calculated  | Reported    |
|----------------|-------------|-------------|
| Volume         | 3671.7(14)  | 3671.8(13)  |
| Space group    | P b c a     | P b c a     |
| Hall group     | -P 2ac 2ab  | -P 2ac 2ab  |
| Moiety formula | C30 H18 O2  | C30 H18 O2  |
| Sum formula    | C30 H18 O2  | C30 H18 O2  |
| Mr             | 410.44      | 410.44      |
| Dx,g cm-3      | 1.485       | 1.485       |
| Z              | 8           | 8           |
| Mu (mm-1)      | 0.092       | 0.092       |
| F000           | 1712.0      | 1712.0      |
| F000'          | 1712.75     |             |
| h,k,lmax       | 22,9,37     | 22,9,37     |
| Nref           | 4217        | 4205        |
| Tmin,Tmax      | 0.989,0.999 | 0.656,1.000 |
| Tmin'          | 0.980       |             |

Correction method= # Reported T Limits: Tmin=0.656 Tmax=1.000  
AbsCorr = MULTI-SCAN

Data completeness= 0.997                      Theta(max)= 27.483

R(reflections)= 0.1319( 925)              wR2(reflections)= 0.4008( 4205)

S = 0.903                      Npar= 291

---

The following ALERTS were generated. Each ALERT has the format

**test-name\_ALERT\_alert-type\_alert-level.**

Click on the hyperlinks for more details of the test.

---

### Alert level A

RINTA01\_ALERT\_3\_A The value of Rint is greater than 0.25  
Rint given 0.321  
PLAT020\_ALERT\_3\_A The Value of Rint is Greater Than 0.12 ..... 0.321 Report  
PLAT026\_ALERT\_3\_A Ratio Observed / Unique Reflections (too) Low .. 22% Check

---

### Alert level B

PLAT084\_ALERT\_3\_B High wR2 Value (i.e. > 0.25) ..... 0.40 Report  
PLAT340\_ALERT\_3\_B Low Bond Precision on C-C Bonds ..... 0.01269 Ang.  
PLAT930\_ALERT\_2\_B FCF-based Twin Law ( 1 0 1)[ 3 0 1] Est.d BASF 0.58 Check

---

### Alert level C

ABSTY02\_ALERT\_1\_C An \_exptl\_absorpt\_correction\_type has been given without  
a literature citation. This should be contained in the  
\_exptl\_absorpt\_process\_details field.  
Absorption correction given as multi-scan  
PLAT082\_ALERT\_2\_C High R1 Value ..... 0.13 Report  
PLAT213\_ALERT\_2\_C Atom C12 has ADP max/min Ratio ..... 3.3 oblate  
PLAT234\_ALERT\_4\_C Large Hirshfeld Difference O1 --C29 . 0.18 Ang.  
PLAT234\_ALERT\_4\_C Large Hirshfeld Difference C9 --C10 . 0.18 Ang.  
PLAT234\_ALERT\_4\_C Large Hirshfeld Difference C14 --C15 . 0.17 Ang.  
PLAT241\_ALERT\_2\_C High MainMol Ueq as Compared to Neighbors of O1 Check  
PLAT241\_ALERT\_2\_C High MainMol Ueq as Compared to Neighbors of C14 Check  
PLAT242\_ALERT\_2\_C Low MainMol Ueq as Compared to Neighbors of C12 Check  
PLAT242\_ALERT\_2\_C Low MainMol Ueq as Compared to Neighbors of C25 Check  
PLAT334\_ALERT\_2\_C Small Aver. Benzene C-C Dist C3 -C15 1.37 Ang.  
PLAT334\_ALERT\_2\_C Small Aver. Benzene C-C Dist C23 -C28 1.37 Ang.  
PLAT363\_ALERT\_2\_C Long C(sp3)-C(sp2) Bond C15 - C16 . 1.64 Ang.  
PLAT906\_ALERT\_3\_C Large K Value in the Analysis of Variance ..... 453.055 Check  
PLAT906\_ALERT\_3\_C Large K Value in the Analysis of Variance ..... 7.585 Check  
PLAT906\_ALERT\_3\_C Large K Value in the Analysis of Variance ..... 57.595 Check  
PLAT906\_ALERT\_3\_C Large K Value in the Analysis of Variance ..... 6.382 Check  
PLAT906\_ALERT\_3\_C Large K Value in the Analysis of Variance ..... 23.678 Check  
PLAT906\_ALERT\_3\_C Large K Value in the Analysis of Variance ..... 4.869 Check  
PLAT906\_ALERT\_3\_C Large K Value in the Analysis of Variance ..... 9.395 Check  
PLAT906\_ALERT\_3\_C Large K Value in the Analysis of Variance ..... 3.485 Check  
PLAT906\_ALERT\_3\_C Large K Value in the Analysis of Variance ..... 5.364 Check  
PLAT906\_ALERT\_3\_C Large K Value in the Analysis of Variance ..... 2.604 Check  
PLAT906\_ALERT\_3\_C Large K Value in the Analysis of Variance ..... 3.119 Check  
PLAT910\_ALERT\_3\_C Missing # of FCF Reflection(s) Below Theta(Min). 5 Note  
PLAT911\_ALERT\_3\_C Missing FCF Refl Between Thmin & STh/L= 0.600 3 Report

---

### Alert level G

PLAT003\_ALERT\_2\_G Number of Uiso or Uij Restrained non-H Atoms ... 30 Report  
PLAT012\_ALERT\_1\_G No \_shelx\_res\_checksum Found in CIF ..... Please Check  
PLAT072\_ALERT\_2\_G SHELXL First Parameter in WGHT Unusually Large 0.15 Report  
PLAT177\_ALERT\_4\_G The CIF-Embedded .res File Contains DELU Records 5 Report  
PLAT178\_ALERT\_4\_G The CIF-Embedded .res File Contains SIMU Records 5 Report  
PLAT187\_ALERT\_4\_G The CIF-Embedded .res File Contains RIGU Records 1 Report  
PLAT860\_ALERT\_3\_G Number of Least-Squares Restraints ..... 331 Note  
PLAT870\_ALERT\_4\_G ALERTS Related to Twinning Effects Suppressed .. ! Info  
PLAT883\_ALERT\_1\_G No Info/Value for \_atom\_sites\_solution\_primary . Please Do !  
PLAT912\_ALERT\_4\_G Missing # of FCF Reflections Above STh/L= 0.600 4 Note  
PLAT931\_ALERT\_5\_G CIFcalcFCF Twin Law [ 3 0 1] Est.d BASF 0.58 Check

---

3 **ALERT level A** = Most likely a serious problem - resolve or explain

3 **ALERT level B** = A potentially serious problem, consider carefully

26 **ALERT level C** = Check. Ensure it is not caused by an omission or oversight  
11 **ALERT level G** = General information/check it is not something unexpected

3 **ALERT type 1** CIF construction/syntax error, inconsistent or missing data  
12 **ALERT type 2** Indicator that the structure model may be wrong or deficient  
19 **ALERT type 3** Indicator that the structure quality may be low  
8 **ALERT type 4** Improvement, methodology, query or suggestion  
1 **ALERT type 5** Informative message, check

---

It is advisable to attempt to resolve as many as possible of the alerts in all categories. Often the minor alerts point to easily fixed oversights, errors and omissions in your CIF or refinement strategy, so attention to these fine details can be worthwhile. In order to resolve some of the more serious problems it may be necessary to carry out additional measurements or structure refinements. However, the purpose of your study may justify the reported deviations and the more serious of these should normally be commented upon in the discussion or experimental section of a paper or in the "special\_details" fields of the CIF. checkCIF was carefully designed to identify outliers and unusual parameters, but every test has its limitations and alerts that are not important in a particular case may appear. Conversely, the absence of alerts does not guarantee there are no aspects of the results needing attention. It is up to the individual to critically assess their own results and, if necessary, seek expert advice.

### **Publication of your CIF in IUCr journals**

A basic structural check has been run on your CIF. These basic checks will be run on all CIFs submitted for publication in IUCr journals (*Acta Crystallographica*, *Journal of Applied Crystallography*, *Journal of Synchrotron Radiation*); however, if you intend to submit to *Acta Crystallographica Section C* or *E* or *IUCrData*, you should make sure that full publication checks are run on the final version of your CIF prior to submission.

### **Publication of your CIF in other journals**

Please refer to the *Notes for Authors* of the relevant journal for any special instructions relating to CIF submission.

---

**PLATON version of 22/12/2019; check.def file version of 13/12/2019**

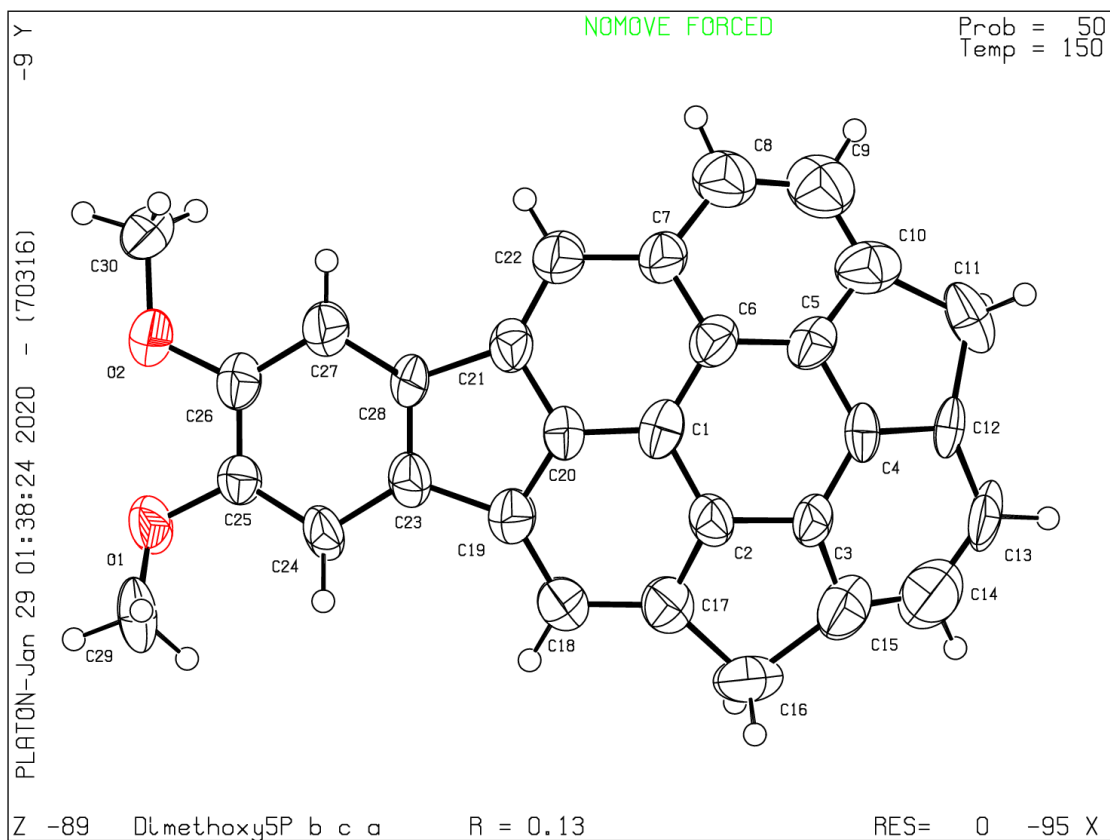

Supplement: Additional file 1 [file 1860-5397-16-66-S1.zip]
