# Supplementary material for: Synthesis of C 70 -fragment buckybowls bearing alkoxy substituents
Source: publisher site journal article supplement (doi:10.3762/bjoc.16.66), 2020-04-15

# checkCIF/PLATON report

Structure factors have been supplied for datablock(s) Dioxole5b

THIS REPORT IS FOR GUIDANCE ONLY. IF USED AS PART OF A REVIEW PROCEDURE FOR PUBLICATION, IT SHOULD NOT REPLACE THE EXPERTISE OF AN EXPERIENCED CRYSTALLOGRAPHIC REFEREE.

No syntax errors found.      CIF dictionary      Interpreting this report

## Datablock: Dioxole5b

---

Bond precision:    C-C = 0.0032 Å                      Wavelength=0.70000

Cell:                      a=3.7712(7)              b=15.097(3)              c=14.845(3)  
                            alpha=90              beta=90.85(3)              gamma=90  
Temperature:              150 K

|                | Calculated | Reported    |
|----------------|------------|-------------|
| Volume         | 845.1(3)   | 845.1(3)    |
| Space group    | P 21/m     | P 1 21/m 1  |
| Hall group     | -P 2yb     | -P 2yb      |
| Moiety formula | C29 H14 O2 | C14.5 H7 O  |
| Sum formula    | C29 H14 O2 | C14.50 H7 O |
| Mr             | 394.40     | 197.20      |
| Dx,g cm-3      | 1.550      | 1.550       |
| Z              | 2          | 4           |
| Mu (mm-1)      | 0.092      | 0.096       |
| F000           | 408.0      | 408.0       |
| F000'          | 408.17     |             |
| h,k,lmax       | 5,21,21    | 5,21,20     |
| Nref           | 2683       | 2458        |
| Tmin,Tmax      |            |             |
| Tmin'          |            |             |

Correction method= Not given

Data completeness= 0.916                      Theta(max)= 30.033

R(reflections)= 0.0718( 2296)              wR2(reflections)= 0.2360( 2458)

S = 1.153                      Npar= 166

---

The following ALERTS were generated. Each ALERT has the format  
**test-name\_ALERT\_alert-type\_alert-level.**  
Click on the hyperlinks for more details of the test.

---

## 🟡 Alert level B

PLAT934\_ALERT\_3\_B Number of (Iobs-Icalc)/Sigma(W) > 10 Outliers .. 2 Check

---

## 🟢 Alert level C

PLAT906\_ALERT\_3\_C Large K Value in the Analysis of Variance ..... 4.856 Check  
PLAT911\_ALERT\_3\_C Missing FCF Refl Between Thmin & STh/L= 0.600 17 Report  
PLAT920\_ALERT\_1\_C Theta(Max) in CIF and FCF Differ by ..... 0.50 Degree

---

## 🟠 Alert level G

ABSMU01\_ALERT\_1\_G Calculation of \_exptl\_absorpt\_correction\_mu  
not performed for this radiation type.

PLAT012\_ALERT\_1\_G No \_shelx\_res\_checksum Found in CIF ..... Please Check  
PLAT042\_ALERT\_1\_G Calc. and Reported MoietyFormula Strings Differ Please Check  
PLAT045\_ALERT\_1\_G Calculated and Reported Z Differ by a Factor ... 0.50 Check  
PLAT072\_ALERT\_2\_G SHELXL First Parameter in WGHT Unusually Large 0.10 Report  
PLAT092\_ALERT\_4\_G Check: Wavelength Given is not Cu,Ga,Mo,Ag,In Ka 0.70000 Ang.  
PLAT230\_ALERT\_2\_G Hirshfeld Test Diff for C6 --C7B . 10.5 s.u.  
PLAT230\_ALERT\_2\_G Hirshfeld Test Diff for C8A --C9 . 7.3 s.u.  
PLAT230\_ALERT\_2\_G Hirshfeld Test Diff for C8B --C9 . 8.5 s.u.  
PLAT300\_ALERT\_4\_G Atom Site Occupancy of C7A Constrained at 0.5 Check  
PLAT300\_ALERT\_4\_G Atom Site Occupancy of C7B Constrained at 0.5 Check  
PLAT300\_ALERT\_4\_G Atom Site Occupancy of C8A Constrained at 0.5 Check  
PLAT300\_ALERT\_4\_G Atom Site Occupancy of C8B Constrained at 0.5 Check  
PLAT300\_ALERT\_4\_G Atom Site Occupancy of H9BA Constrained at 0.5 Check  
PLAT300\_ALERT\_4\_G Atom Site Occupancy of H9BB Constrained at 0.5 Check  
PLAT300\_ALERT\_4\_G Atom Site Occupancy of H6AA Constrained at 0.5 Check  
PLAT300\_ALERT\_4\_G Atom Site Occupancy of H6AB Constrained at 0.5 Check  
PLAT300\_ALERT\_4\_G Atom Site Occupancy of H6B Constrained at 0.5 Check  
PLAT300\_ALERT\_4\_G Atom Site Occupancy of H7A Constrained at 0.5 Check  
PLAT300\_ALERT\_4\_G Atom Site Occupancy of H8B Constrained at 0.5 Check  
PLAT300\_ALERT\_4\_G Atom Site Occupancy of H9A Constrained at 0.5 Check  
PLAT301\_ALERT\_3\_G Main Residue Disorder .....(Resd 1 ) 13% Note  
PLAT398\_ALERT\_2\_G Deviating C-O-C Angle From 120 for O1 104.3 Degree  
PLAT720\_ALERT\_4\_G Number of Unusual/Non-Standard Labels ..... 4 Note  
PLAT910\_ALERT\_3\_G Missing # of FCF Reflection(s) Below Theta(Min). 1 Note  
PLAT912\_ALERT\_4\_G Missing # of FCF Reflections Above STh/L= 0.600 88 Note  
PLAT913\_ALERT\_3\_G Missing # of Very Strong Reflections in FCF .... 1 Note  
PLAT978\_ALERT\_2\_G Number C-C Bonds with Positive Residual Density. 4 Info  
PLAT992\_ALERT\_5\_G Repd & Actual \_reflns\_number\_gt Values Differ by 2 Check

---

0 **ALERT level A** = Most likely a serious problem - resolve or explain

1 **ALERT level B** = A potentially serious problem, consider carefully

3 **ALERT level C** = Check. Ensure it is not caused by an omission or oversight

29 **ALERT level G** = General information/check it is not something unexpected

5 ALERT type 1 CIF construction/syntax error, inconsistent or missing data

6 ALERT type 2 Indicator that the structure model may be wrong or deficient

6 ALERT type 3 Indicator that the structure quality may be low

15 ALERT type 4 Improvement, methodology, query or suggestion

1 ALERT type 5 Informative message, check

---

It is advisable to attempt to resolve as many as possible of the alerts in all categories. Often the minor alerts point to easily fixed oversights, errors and omissions in your CIF or refinement strategy, so attention to these fine details can be worthwhile. In order to resolve some of the more serious problems it may be necessary to carry out additional measurements or structure refinements. However, the purpose of your study may justify the reported deviations and the more serious of these should normally be commented upon in the discussion or experimental section of a paper or in the "special\_details" fields of the CIF. checkCIF was carefully designed to identify outliers and unusual parameters, but every test has its limitations and alerts that are not important in a particular case may appear. Conversely, the absence of alerts does not guarantee there are no aspects of the results needing attention. It is up to the individual to critically assess their own results and, if necessary, seek expert advice.

### **Publication of your CIF in IUCr journals**

A basic structural check has been run on your CIF. These basic checks will be run on all CIFs submitted for publication in IUCr journals (*Acta Crystallographica*, *Journal of Applied Crystallography*, *Journal of Synchrotron Radiation*); however, if you intend to submit to *Acta Crystallographica Section C* or *E* or *IUCrData*, you should make sure that full publication checks are run on the final version of your CIF prior to submission.

### **Publication of your CIF in other journals**

Please refer to the *Notes for Authors* of the relevant journal for any special instructions relating to CIF submission.

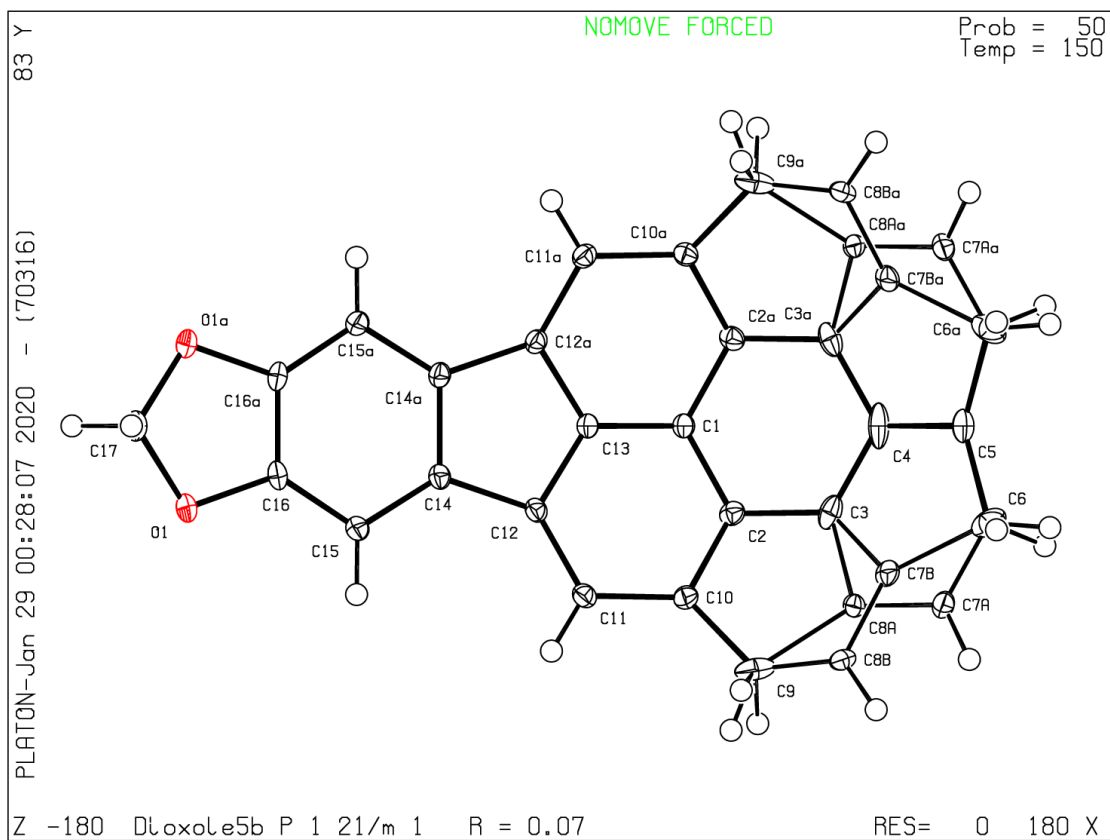

Supplement: Additional file 1 [file 1860-5397-16-66-S1.zip]
