# Supplementary material for: Synthesis of C70-fragment buckybowls bearing alkoxy substituents
Source: Beilstein J Org Chem. 2020 Apr 15;16:681–90. doi: 10.3762/bjoc.16.66 (PMC7176931; doi:10.3762/bjoc.16.66)
Supplement: File 1 — CIF files of compounds 5a–c. [file Beilstein_J_Org_Chem-16-681-s001.zip]

Archive with 6 entries (6 files):
- Dimethoxy-5a-re.cif
- Dimethoxy-5a.pdf
- Dioxole-5b.cif
- Dioxole-5b.pdf
- Dioxole-5c-re.cif
- Dioxole-5c.pdf
