# Supplementary material for: Synthesis of C70-fragment buckybowls bearing alkoxy substituents
Source: Beilstein J Org Chem. 2020 Apr 15;16:681–90. doi: 10.3762/bjoc.16.66 (PMC7176931; doi:10.3762/bjoc.16.66)
Supplement: File 1 — CIF files of compounds 5a–c. [file Beilstein_J_Org_Chem-16-681-s001.zip › Dimethoxy-5a-re.cif]

data_Dimethoxy5a
_audit_creation_date               2020-01-29
_audit_creation_method
;
Olex2 1.2
(compiled 2018.05.29 svn.r3508 for OlexSys, GUI svn.r5506)
;
_shelx_SHELXL_version_number       '2018/3'
_audit_contact_author_address      ?
_audit_contact_author_email        ?
_audit_contact_author_name         ''
_audit_contact_author_phone        ?
_publ_contact_author_id_orcid      ?
_publ_section_references
;
Dolomanov, O.V., Bourhis, L.J., Gildea, R.J, Howard, J.A.K. & Puschmann, H.
 (2009), J. Appl. Cryst. 42, 339-341.

Sheldrick, G.M. (2015). Acta Cryst. C71, 3-8.
;
_publ_section_exptl_refinement
;
Because of the materials's nature to give exclusively polycrystals in which 
very thin single crystals were stacked, we could not get much more reliable 
data though we tried various crystallization conditions and measurements 
including synchrotron X-ray. Here shows the best data so far 
we could obtained.
;
_chemical_name_common              ?
_chemical_name_systematic          ?
_chemical_formula_moiety           'C30 H18 O2'
_chemical_formula_sum              'C30 H18 O2'
_chemical_formula_weight           410.44
_chemical_melting_point            ?
loop_
  _atom_type_symbol
  _atom_type_description
  _atom_type_scat_dispersion_real
  _atom_type_scat_dispersion_imag
  _atom_type_scat_source
 'C' 'C' 0.0033 0.0016 'International Tables Vol C Tables 4.2.6.8 and 6.1.1.4'
 'H' 'H' 0.0000 0.0000 'International Tables Vol C Tables 4.2.6.8 and 6.1.1.4'
 'O' 'O' 0.0106 0.0060 'International Tables Vol C Tables 4.2.6.8 and 6.1.1.4'

_shelx_space_group_comment
;
The symmetry employed for this shelxl refinement is uniquely defined
by the following loop, which should always be used as a source of
symmetry information in preference to the above space-group names.
They are only intended as comments.
;
_space_group_crystal_system        'orthorhombic'
_space_group_IT_number             61
_space_group_name_H-M_alt          'P b c a'
_space_group_name_Hall             '-P 2ac 2ab'
loop_
  _space_group_symop_operation_xyz
 'x, y, z'
 '-x+1/2, -y, z+1/2'
 '-x, y+1/2, -z+1/2'
 'x+1/2, -y+1/2, -z'
 '-x, -y, -z'
 'x-1/2, y, -z-1/2'
 'x, -y-1/2, z-1/2'
 '-x-1/2, y-1/2, z'

_cell_length_a                     17.382(4)
_cell_length_b                     7.2895(15)
_cell_length_c                     28.978(6)
_cell_angle_alpha                  90
_cell_angle_beta                   90
_cell_angle_gamma                  90
_cell_volume                       3671.8(13)
_cell_formula_units_Z              8
_cell_measurement_reflns_used      35
_cell_measurement_temperature      150(2)
_cell_measurement_theta_max        15.71
_cell_measurement_theta_min        3.65
_shelx_estimated_absorpt_T_max     ?
_shelx_estimated_absorpt_T_min     ?
_exptl_absorpt_coefficient_mu      0.092
_exptl_absorpt_correction_T_max    1.0000
_exptl_absorpt_correction_T_min    0.6562
_exptl_absorpt_correction_type     multi-scan
_exptl_absorpt_process_details     
;
    Higashi, T. (1995). Program for Absorption Correction.
    Rigaku Corporation, Tokyo, Japan.
; 
_exptl_absorpt_special_details     ?
_exptl_crystal_colour              ?
_exptl_crystal_density_diffrn      1.485
_exptl_crystal_density_meas        ?
_exptl_crystal_density_method      ?
_exptl_crystal_description         platelet
_exptl_crystal_F_000               1712
_exptl_crystal_size_max            0.22
_exptl_crystal_size_mid            0.10
_exptl_crystal_size_min            0.01
_exptl_transmission_factor_max     ?
_exptl_transmission_factor_min     ?
_diffrn_reflns_av_R_equivalents    0.3207
_diffrn_reflns_av_unetI/netI       0.4003
_diffrn_reflns_Laue_measured_fraction_full  0.997
_diffrn_reflns_Laue_measured_fraction_max  0.997
_diffrn_reflns_limit_h_max         22
_diffrn_reflns_limit_h_min         -22
_diffrn_reflns_limit_k_max         9
_diffrn_reflns_limit_k_min         -9
_diffrn_reflns_limit_l_max         37
_diffrn_reflns_limit_l_min         -37
_diffrn_reflns_number              23687
_diffrn_reflns_point_group_measured_fraction_full  0.997
_diffrn_reflns_point_group_measured_fraction_max  0.997
_diffrn_reflns_theta_full          26.000
_diffrn_reflns_theta_max           27.483
_diffrn_reflns_theta_min           3.046
_diffrn_ambient_temperature        150(2)
_diffrn_detector_area_resol_mean   ?
_diffrn_measured_fraction_theta_full  0.997
_diffrn_measured_fraction_theta_max  0.997
_diffrn_measurement_device_type    'Rigaku R-AXIS VII area detector'
_diffrn_measurement_method         '\w scans'
_diffrn_radiation_monochromator    'graphite'
_diffrn_radiation_type             MoK\a
_diffrn_radiation_wavelength       0.71073
_diffrn_source                     'fine-focus sealed tube'
_reflns_Friedel_coverage           0.000
_reflns_Friedel_fraction_full      .
_reflns_Friedel_fraction_max       .
_reflns_number_gt                  925
_reflns_number_total               4205
_reflns_special_details
;
 Reflections were merged by SHELXL according to the crystal
 class for the calculation of statistics and refinement.
 
 _reflns_Friedel_fraction is defined as the number of unique
 Friedel pairs measured divided by the number that would be
 possible theoretically, ignoring centric projections and
 systematic absences.
;
_reflns_threshold_expression       'I > 2\s(I)'
_computing_cell_refinement         'PROCESS-AUTO'
_computing_data_collection         'PROCESS-AUTO'
_computing_data_reduction          'PROCESS-AUTO'
_computing_molecular_graphics      'Olex2 (Dolomanov et al., 2009)'
_computing_publication_material    'Olex2 (Dolomanov et al., 2009)'
_computing_structure_refinement    'ShelXL (Sheldrick, 2015)'
_computing_structure_solution      'SHELXT 2014/5 (Sheldrick, 2014)'
_refine_diff_density_max           0.490
_refine_diff_density_min           -0.309
_refine_diff_density_rms           0.089
_refine_ls_extinction_coef         .
_refine_ls_extinction_method       none
_refine_ls_goodness_of_fit_ref     0.903
_refine_ls_hydrogen_treatment      constr
_refine_ls_matrix_type             full
_refine_ls_number_parameters       291
_refine_ls_number_reflns           4205
_refine_ls_number_restraints       331
_refine_ls_R_factor_all            0.4240
_refine_ls_R_factor_gt             0.1319
_refine_ls_restrained_S_all        0.885
_refine_ls_shift/su_max            0.000
_refine_ls_shift/su_mean           0.000
_refine_ls_structure_factor_coef   Fsqd
_refine_ls_weighting_details      
 'w=1/[\s^2^(Fo^2^)+(0.1531P)^2^] where P=(Fo^2^+2Fc^2^)/3'
_refine_ls_weighting_scheme        calc
_refine_ls_wR_factor_gt            0.2925
_refine_ls_wR_factor_ref           0.4008
_refine_special_details            ?
_olex2_refinement_description
;
1. Fixed Uiso
 At 1.2 times of:
  All C(H) groups, All C(H,H) groups
 At 1.5 times of:
  All C(H,H,H) groups
2. Rigid bond restraints
 C5, C6, C7, C8, C9, C10
 with sigma for 1-2 distances of 0.01 and sigma for 1-3 distances of 0.01
 C1, C2, C3, C4, C5, C6, C7, C8, C9, C10, C11, C12, C13, C14, C15, C16, C17,
 C18, C19, C20, C21, C22, C23, C24, H24, C25, C26, C27, H27, C28, H30A, H30B,
 H30C
 with sigma for 1-2 distances of 0.01 and sigma for 1-3 distances of 0.01
 C11, C12, C13
 with sigma for 1-2 distances of 0.01 and sigma for 1-3 distances of 0.01
 O1, C29
 with sigma for 1-2 distances of 0.01 and sigma for 1-3 distances of 0.01
 C23, C24, C25, C26, C27, C28
 with sigma for 1-2 distances of 0.01 and sigma for 1-3 distances of 0.01
3. Uiso/Uaniso restraints and constraints
C5 \\sim C6 \\sim C7 \\sim C8 \\sim C9 \\sim C10: within 1.7A with sigma of
0.04 and sigma for terminal atoms of 0.08
C1 \\sim C2 \\sim C3 \\sim C4 \\sim C5 \\sim C6 \\sim C7 \\sim C8 \\sim C9
\\sim C10 \\sim C11 \\sim C12 \\sim C13 \\sim C14 \\sim C15 \\sim C16 \\sim C17
\\sim C18 \\sim C19 \\sim C20 \\sim C21 \\sim C22 \\sim C23 \\sim C24 \\sim H24
\\sim C25 \\sim C26 \\sim C27 \\sim H27 \\sim C28: within 1.7A with sigma of
0.04 and sigma for terminal atoms of 0.08
C11 \\sim C12 \\sim C13: within 1.7A with sigma of 0.04 and sigma for terminal
atoms of 0.08
O1 \\sim C29: within 1.7A with sigma of 0.04 and sigma for terminal atoms of
0.08
C23 \\sim C24 \\sim C25 \\sim C26 \\sim C27 \\sim C28: within 1.7A with sigma
of 0.04 and sigma for terminal atoms of 0.08
4. Rigid body (RIGU) restrains
 C24, C27
 with sigma for 1-2 distances of 0.004 and sigma for 1-3 distances of 0.004
5.a Secondary CH2 refined with riding coordinates:
 C11(H11A,H11B), C16(H16A,H16B)
5.b Aromatic/amide H refined with riding coordinates:
 C8(H8), C9(H9), C13(H13), C14(H14), C18(H18), C22(H22), C24(H24), C27(H27)
5.c Idealised Me refined as rotating group:
 C29(H29A,H29B,H29C), C30(H30A,H30B,H30C)
;
_atom_sites_solution_hydrogens     geom
_atom_sites_solution_primary       ?
_atom_sites_solution_secondary     ?
loop_
  _atom_site_label
  _atom_site_type_symbol
  _atom_site_fract_x
  _atom_site_fract_y
  _atom_site_fract_z
  _atom_site_U_iso_or_equiv
  _atom_site_adp_type
  _atom_site_occupancy
  _atom_site_site_symmetry_order
  _atom_site_calc_flag
  _atom_site_refinement_flags_posn
  _atom_site_refinement_flags_adp
  _atom_site_refinement_flags_occupancy
  _atom_site_disorder_assembly
  _atom_site_disorder_group
 O1 O 0.5892(3) 0.2881(9) 0.0579(2) 0.074(2) Uani 1 1 d . U . . .
 O2 O 0.7353(4) 0.3227(9) 0.05603(18) 0.067(2) Uani 1 1 d . . . . .
 C1 C 0.6558(5) 0.5921(11) 0.2916(3) 0.046(2) Uani 1 1 d . U . . .
 C2 C 0.5870(5) 0.5570(13) 0.3165(3) 0.051(2) Uani 1 1 d . U . . .
 C3 C 0.5899(5) 0.5419(12) 0.3647(3) 0.049(2) Uani 1 1 d . U . . .
 C4 C 0.6587(5) 0.5695(11) 0.3870(3) 0.0425(19) Uani 1 1 d . U . . .
 C5 C 0.7264(5) 0.6046(11) 0.3619(3) 0.049(2) Uani 1 1 d . U . . .
 C6 C 0.7251(5) 0.6174(12) 0.3153(3) 0.052(2) Uani 1 1 d . U . . .
 C7 C 0.7917(5) 0.5969(13) 0.2912(3) 0.056(2) Uani 1 1 d . U . . .
 C8 C 0.8563(5) 0.5785(14) 0.3201(4) 0.074(3) Uani 1 1 d . U . . .
 H8 H 0.904517 0.581022 0.306267 0.088 Uiso 1 1 calc R . . . .
 C9 C 0.8537(6) 0.5578(14) 0.3660(4) 0.082(3) Uani 1 1 d . U . . .
 H9 H 0.899820 0.545435 0.382017 0.099 Uiso 1 1 calc R . . . .
 C10 C 0.7907(6) 0.5542(13) 0.3890(4) 0.068(3) Uani 1 1 d . U . . .
 C11 C 0.7572(5) 0.4909(14) 0.4385(3) 0.068(3) Uani 1 1 d . U . . .
 H11A H 0.775432 0.369600 0.446875 0.081 Uiso 1 1 calc R . . . .
 H11B H 0.771133 0.577143 0.462598 0.081 Uiso 1 1 calc R . . . .
 C12 C 0.6697(5) 0.4912(11) 0.4297(3) 0.040(2) Uani 1 1 d . U . . .
 C13 C 0.6064(6) 0.3993(14) 0.4493(3) 0.072(3) Uani 1 1 d . U . . .
 H13 H 0.608307 0.359291 0.479746 0.086 Uiso 1 1 calc R . . . .
 C14 C 0.5451(7) 0.3709(16) 0.4245(4) 0.096(4) Uani 1 1 d . U . . .
 H14 H 0.507570 0.297985 0.438177 0.115 Uiso 1 1 calc R . . . .
 C15 C 0.5287(6) 0.4312(15) 0.3826(4) 0.078(3) Uani 1 1 d . U . . .
 C16 C 0.4727(5) 0.3889(14) 0.3385(3) 0.074(3) Uani 1 1 d . U . . .
 H16A H 0.462238 0.258831 0.335281 0.088 Uiso 1 1 calc R . . . .
 H16B H 0.424580 0.455715 0.340520 0.088 Uiso 1 1 calc R . . . .
 C17 C 0.5250(5) 0.4626(12) 0.2984(3) 0.057(2) Uani 1 1 d . U . . .
 C18 C 0.5262(5) 0.4238(13) 0.2499(3) 0.064(3) Uani 1 1 d . U . . .
 H18 H 0.484575 0.366676 0.235722 0.077 Uiso 1 1 calc R . . . .
 C19 C 0.5914(5) 0.4736(12) 0.2242(3) 0.056(2) Uani 1 1 d . U . . .
 C20 C 0.6532(5) 0.5517(11) 0.2465(3) 0.044(2) Uani 1 1 d . U . . .
 C21 C 0.7224(5) 0.5410(11) 0.2213(3) 0.048(2) Uani 1 1 d . U . . .
 C22 C 0.7921(5) 0.5598(12) 0.2429(3) 0.061(3) Uani 1 1 d . U . . .
 H22 H 0.837992 0.548769 0.226697 0.073 Uiso 1 1 calc R . . . .
 C23 C 0.6210(5) 0.4304(12) 0.1767(3) 0.048(2) Uani 1 1 d . U . . .
 C24 C 0.5807(5) 0.3751(13) 0.1376(3) 0.062(3) Uani 1 1 d . U . . .
 H24 H 0.527701 0.357718 0.138179 0.075 Uiso 1 1 calc R U . . .
 C25 C 0.6227(5) 0.3475(11) 0.0982(3) 0.046(2) Uani 1 1 d . U . . .
 C26 C 0.6995(5) 0.3687(12) 0.0969(3) 0.051(2) Uani 1 1 d . U . . .
 C27 C 0.7390(5) 0.4292(13) 0.1362(3) 0.062(3) Uani 1 1 d . U . . .
 H27 H 0.792159 0.443267 0.135844 0.074 Uiso 1 1 calc R U . . .
 C28 C 0.6971(5) 0.4671(12) 0.1753(3) 0.043(2) Uani 1 1 d . U . . .
 C29 C 0.5146(5) 0.3329(12) 0.0510(3) 0.066(3) Uani 1 1 d . U . . .
 H29A H 0.497346 0.281511 0.022350 0.099 Uiso 1 1 calc GR . . . .
 H29B H 0.509548 0.463945 0.050046 0.099 Uiso 1 1 calc GR . . . .
 H29C H 0.484060 0.284969 0.075852 0.099 Uiso 1 1 calc GR . . . .
 C30 C 0.8177(5) 0.3364(14) 0.0533(3) 0.066(3) Uani 1 1 d . . . . .
 H30A H 0.834795 0.289063 0.024094 0.099 Uiso 1 1 calc GR U . . .
 H30B H 0.840492 0.266655 0.077789 0.099 Uiso 1 1 calc GR U . . .
 H30C H 0.832713 0.462639 0.056009 0.099 Uiso 1 1 calc GR U . . .

loop_
  _atom_site_aniso_label
  _atom_site_aniso_U_11
  _atom_site_aniso_U_22
  _atom_site_aniso_U_33
  _atom_site_aniso_U_23
  _atom_site_aniso_U_13
  _atom_site_aniso_U_12
 O1 0.057(4) 0.122(6) 0.043(4) -0.035(4) -0.006(3) 0.022(4)
 O2 0.067(5) 0.097(6) 0.038(4) -0.010(4) 0.007(4) -0.013(4)
 C1 0.069(5) 0.029(5) 0.039(4) 0.006(4) 0.009(4) 0.002(4)
 C2 0.049(5) 0.065(6) 0.038(4) 0.002(5) -0.008(4) 0.013(4)
 C3 0.050(5) 0.064(6) 0.033(4) -0.014(4) 0.006(4) 0.013(4)
 C4 0.069(5) 0.033(5) 0.025(4) -0.008(4) 0.000(4) 0.002(4)
 C5 0.061(5) 0.037(5) 0.048(4) -0.003(4) 0.015(4) -0.018(5)
 C6 0.057(5) 0.053(6) 0.047(4) -0.002(5) 0.010(4) -0.011(5)
 C7 0.055(5) 0.065(6) 0.048(5) -0.016(5) 0.008(4) -0.011(5)
 C8 0.066(6) 0.077(7) 0.078(6) 0.006(7) -0.005(5) -0.014(6)
 C9 0.083(6) 0.076(8) 0.088(6) 0.010(7) -0.009(5) -0.019(7)
 C10 0.056(5) 0.060(7) 0.088(6) -0.012(6) 0.007(4) -0.009(5)
 C11 0.089(6) 0.062(6) 0.052(5) -0.008(5) -0.034(5) 0.020(5)
 C12 0.071(5) 0.030(5) 0.021(4) -0.015(4) 0.010(4) 0.010(4)
 C13 0.106(7) 0.084(8) 0.025(5) -0.018(5) 0.020(5) -0.022(7)
 C14 0.099(8) 0.108(10) 0.082(7) -0.009(7) 0.025(6) -0.015(7)
 C15 0.080(6) 0.097(9) 0.058(5) -0.006(6) 0.019(5) 0.006(6)
 C16 0.043(5) 0.080(7) 0.098(6) -0.015(6) 0.010(4) -0.008(5)
 C17 0.058(5) 0.057(6) 0.057(5) -0.019(5) -0.001(4) 0.014(4)
 C18 0.059(6) 0.082(7) 0.051(5) 0.000(5) -0.006(4) -0.013(5)
 C19 0.060(5) 0.062(6) 0.045(5) -0.011(5) 0.003(4) -0.002(5)
 C20 0.057(5) 0.042(5) 0.032(4) 0.001(4) -0.001(4) -0.001(4)
 C21 0.062(5) 0.048(6) 0.035(4) 0.005(4) 0.002(4) -0.016(5)
 C22 0.060(5) 0.069(7) 0.054(5) -0.008(5) 0.007(4) -0.019(5)
 C23 0.057(5) 0.053(6) 0.034(4) 0.006(4) -0.006(4) 0.007(5)
 C24 0.046(5) 0.106(8) 0.035(5) -0.014(5) -0.014(4) 0.033(5)
 C25 0.047(5) 0.050(6) 0.040(5) -0.012(4) 0.000(5) 0.001(5)
 C26 0.065(5) 0.048(6) 0.039(5) -0.005(4) 0.004(5) -0.003(5)
 C27 0.064(6) 0.079(7) 0.043(5) -0.009(5) 0.002(4) -0.019(6)
 C28 0.056(5) 0.050(5) 0.024(4) 0.023(4) 0.000(4) -0.005(5)
 C29 0.104(7) 0.064(7) 0.030(5) 0.001(5) -0.015(6) 0.024(6)
 C30 0.056(6) 0.088(8) 0.054(7) 0.006(6) 0.012(5) -0.001(6)

_geom_special_details
;
 All esds (except the esd in the dihedral angle between two l.s. planes)
 are estimated using the full covariance matrix.  The cell esds are taken
 into account individually in the estimation of esds in distances, angles
 and torsion angles; correlations between esds in cell parameters are only
 used when they are defined by crystal symmetry.  An approximate (isotropic)
 treatment of cell esds is used for estimating esds involving l.s. planes.
;
loop_
  _geom_bond_atom_site_label_1
  _geom_bond_atom_site_label_2
  _geom_bond_distance
  _geom_bond_site_symmetry_2
  _geom_bond_publ_flag
 O1 C25 1.375(9) . ?
 O1 C29 1.352(8) . ?
 O2 C26 1.380(9) . ?
 O2 C30 1.437(8) . ?
 C1 C2 1.419(10) . ?
 C1 C6 1.400(10) . ?
 C1 C20 1.339(10) . ?
 C2 C3 1.403(10) . ?
 C2 C17 1.382(11) . ?
 C3 C4 1.373(10) . ?
 C3 C15 1.432(12) . ?
 C4 C5 1.407(10) . ?
 C4 C12 1.377(10) . ?
 C5 C6 1.353(10) . ?
 C5 C10 1.413(11) . ?
 C6 C7 1.360(10) . ?
 C7 C8 1.407(11) . ?
 C7 C22 1.424(10) . ?
 C8 H8 0.9300 . ?
 C8 C9 1.340(11) . ?
 C9 H9 0.9300 . ?
 C9 C10 1.281(11) . ?
 C10 C11 1.616(12) . ?
 C11 H11A 0.9700 . ?
 C11 H11B 0.9700 . ?
 C11 C12 1.543(10) . ?
 C12 C13 1.408(11) . ?
 C13 H13 0.9300 . ?
 C13 C14 1.301(11) . ?
 C14 H14 0.9300 . ?
 C14 C15 1.323(12) . ?
 C15 C16 1.635(12) . ?
 C16 H16A 0.9700 . ?
 C16 H16B 0.9700 . ?
 C16 C17 1.570(11) . ?
 C17 C18 1.434(10) . ?
 C18 H18 0.9300 . ?
 C18 C19 1.404(10) . ?
 C19 C20 1.377(10) . ?
 C19 C23 1.504(10) . ?
 C20 C21 1.410(10) . ?
 C21 C22 1.370(10) . ?
 C21 C28 1.502(10) . ?
 C22 H22 0.9300 . ?
 C23 C24 1.393(10) . ?
 C23 C28 1.349(10) . ?
 C24 H24 0.9300 . ?
 C24 C25 1.369(10) . ?
 C25 C26 1.345(10) . ?
 C26 C27 1.401(10) . ?
 C27 H27 0.9300 . ?
 C27 C28 1.376(10) . ?
 C29 H29A 0.9600 . ?
 C29 H29B 0.9600 . ?
 C29 H29C 0.9600 . ?
 C30 H30A 0.9600 . ?
 C30 H30B 0.9600 . ?
 C30 H30C 0.9600 . ?

loop_
  _geom_angle_atom_site_label_1
  _geom_angle_atom_site_label_2
  _geom_angle_atom_site_label_3
  _geom_angle
  _geom_angle_site_symmetry_1
  _geom_angle_site_symmetry_3
  _geom_angle_publ_flag
 C29 O1 C25 117.0(7) . . ?
 C26 O2 C30 118.8(7) . . ?
 C6 C1 C2 119.9(8) . . ?
 C20 C1 C2 115.3(8) . . ?
 C20 C1 C6 122.5(8) . . ?
 C3 C2 C1 119.4(8) . . ?
 C17 C2 C1 123.6(8) . . ?
 C17 C2 C3 111.5(9) . . ?
 C2 C3 C15 112.3(9) . . ?
 C4 C3 C2 119.2(8) . . ?
 C4 C3 C15 124.0(9) . . ?
 C3 C4 C5 120.9(8) . . ?
 C3 C4 C12 118.9(8) . . ?
 C12 C4 C5 115.0(8) . . ?
 C4 C5 C10 109.1(8) . . ?
 C6 C5 C4 120.9(9) . . ?
 C6 C5 C10 125.8(9) . . ?
 C5 C6 C1 119.7(8) . . ?
 C5 C6 C7 119.4(9) . . ?
 C7 C6 C1 117.7(9) . . ?
 C6 C7 C8 112.5(9) . . ?
 C6 C7 C22 122.0(9) . . ?
 C8 C7 C22 124.2(9) . . ?
 C7 C8 H8 117.4 . . ?
 C9 C8 C7 125.1(10) . . ?
 C9 C8 H8 117.4 . . ?
 C8 C9 H9 118.5 . . ?
 C10 C9 C8 123.1(11) . . ?
 C10 C9 H9 118.5 . . ?
 C5 C10 C11 106.4(8) . . ?
 C9 C10 C5 112.5(10) . . ?
 C9 C10 C11 140.7(11) . . ?
 C10 C11 H11A 111.4 . . ?
 C10 C11 H11B 111.4 . . ?
 H11A C11 H11B 109.2 . . ?
 C12 C11 C10 102.0(6) . . ?
 C12 C11 H11A 111.4 . . ?
 C12 C11 H11B 111.4 . . ?
 C4 C12 C11 106.7(7) . . ?
 C4 C12 C13 116.8(8) . . ?
 C13 C12 C11 134.7(8) . . ?
 C12 C13 H13 120.2 . . ?
 C14 C13 C12 119.5(10) . . ?
 C14 C13 H13 120.2 . . ?
 C13 C14 H14 115.5 . . ?
 C13 C14 C15 129.1(12) . . ?
 C15 C14 H14 115.5 . . ?
 C3 C15 C16 105.4(8) . . ?
 C14 C15 C3 111.1(10) . . ?
 C14 C15 C16 141.5(11) . . ?
 C15 C16 H16A 111.8 . . ?
 C15 C16 H16B 111.8 . . ?
 H16A C16 H16B 109.5 . . ?
 C17 C16 C15 99.8(7) . . ?
 C17 C16 H16A 111.8 . . ?
 C17 C16 H16B 111.8 . . ?
 C2 C17 C16 109.9(8) . . ?
 C2 C17 C18 117.3(8) . . ?
 C18 C17 C16 131.8(8) . . ?
 C17 C18 H18 120.7 . . ?
 C19 C18 C17 118.7(8) . . ?
 C19 C18 H18 120.7 . . ?
 C18 C19 C23 135.0(8) . . ?
 C20 C19 C18 119.3(8) . . ?
 C20 C19 C23 104.4(8) . . ?
 C1 C20 C19 125.0(8) . . ?
 C1 C20 C21 119.3(8) . . ?
 C19 C20 C21 113.6(8) . . ?
 C20 C21 C28 103.3(7) . . ?
 C22 C21 C20 120.7(8) . . ?
 C22 C21 C28 134.5(8) . . ?
 C7 C22 H22 121.2 . . ?
 C21 C22 C7 117.7(8) . . ?
 C21 C22 H22 121.2 . . ?
 C24 C23 C19 129.3(8) . . ?
 C28 C23 C19 108.7(7) . . ?
 C28 C23 C24 121.8(8) . . ?
 C23 C24 H24 121.5 . . ?
 C25 C24 C23 116.9(8) . . ?
 C25 C24 H24 121.5 . . ?
 C24 C25 O1 122.0(8) . . ?
 C26 C25 O1 115.6(8) . . ?
 C26 C25 C24 122.4(8) . . ?
 O2 C26 C27 123.5(8) . . ?
 C25 C26 O2 116.4(8) . . ?
 C25 C26 C27 120.0(8) . . ?
 C26 C27 H27 120.9 . . ?
 C28 C27 C26 118.3(8) . . ?
 C28 C27 H27 120.9 . . ?
 C23 C28 C21 109.4(7) . . ?
 C23 C28 C27 120.2(8) . . ?
 C27 C28 C21 130.3(8) . . ?
 O1 C29 H29A 109.5 . . ?
 O1 C29 H29B 109.5 . . ?
 O1 C29 H29C 109.5 . . ?
 H29A C29 H29B 109.5 . . ?
 H29A C29 H29C 109.5 . . ?
 H29B C29 H29C 109.5 . . ?
 O2 C30 H30A 109.5 . . ?
 O2 C30 H30B 109.5 . . ?
 O2 C30 H30C 109.5 . . ?
 H30A C30 H30B 109.5 . . ?
 H30A C30 H30C 109.5 . . ?
 H30B C30 H30C 109.5 . . ?

loop_
  _geom_torsion_atom_site_label_1
  _geom_torsion_atom_site_label_2
  _geom_torsion_atom_site_label_3
  _geom_torsion_atom_site_label_4
  _geom_torsion
  _geom_torsion_site_symmetry_1
  _geom_torsion_site_symmetry_2
  _geom_torsion_site_symmetry_3
  _geom_torsion_site_symmetry_4
  _geom_torsion_publ_flag
 O1 C25 C26 O2 -2.1(11) . . . . ?
 O1 C25 C26 C27 179.8(8) . . . . ?
 O2 C26 C27 C28 -178.6(8) . . . . ?
 C1 C2 C3 C4 2.9(13) . . . . ?
 C1 C2 C3 C15 -154.0(9) . . . . ?
 C1 C2 C17 C16 160.2(8) . . . . ?
 C1 C2 C17 C18 -9.9(13) . . . . ?
 C1 C6 C7 C8 -164.7(8) . . . . ?
 C1 C6 C7 C22 3.0(14) . . . . ?
 C1 C20 C21 C22 4.2(12) . . . . ?
 C1 C20 C21 C28 171.9(7) . . . . ?
 C2 C1 C6 C5 1.3(13) . . . . ?
 C2 C1 C6 C7 161.1(8) . . . . ?
 C2 C1 C20 C19 -3.0(13) . . . . ?
 C2 C1 C20 C21 -165.4(7) . . . . ?
 C2 C3 C4 C5 -2.8(13) . . . . ?
 C2 C3 C4 C12 -155.9(8) . . . . ?
 C2 C3 C15 C14 160.2(9) . . . . ?
 C2 C3 C15 C16 -7.3(10) . . . . ?
 C2 C17 C18 C19 3.6(12) . . . . ?
 C3 C2 C17 C16 6.7(10) . . . . ?
 C3 C2 C17 C18 -163.4(8) . . . . ?
 C3 C4 C5 C6 2.0(13) . . . . ?
 C3 C4 C5 C10 -156.2(8) . . . . ?
 C3 C4 C12 C11 162.0(7) . . . . ?
 C3 C4 C12 C13 -5.0(11) . . . . ?
 C3 C15 C16 C17 10.1(9) . . . . ?
 C4 C3 C15 C14 4.5(14) . . . . ?
 C4 C3 C15 C16 -162.9(8) . . . . ?
 C4 C5 C6 C1 -1.2(13) . . . . ?
 C4 C5 C6 C7 -160.6(8) . . . . ?
 C4 C5 C10 C9 170.7(9) . . . . ?
 C4 C5 C10 C11 -3.8(10) . . . . ?
 C4 C12 C13 C14 9.1(13) . . . . ?
 C5 C4 C12 C11 7.3(10) . . . . ?
 C5 C4 C12 C13 -159.7(7) . . . . ?
 C5 C6 C7 C8 -4.9(13) . . . . ?
 C5 C6 C7 C22 162.9(9) . . . . ?
 C5 C10 C11 C12 7.6(9) . . . . ?
 C6 C1 C2 C3 -2.2(13) . . . . ?
 C6 C1 C2 C17 -153.7(9) . . . . ?
 C6 C1 C20 C19 159.9(8) . . . . ?
 C6 C1 C20 C21 -2.6(13) . . . . ?
 C6 C5 C10 C9 13.8(14) . . . . ?
 C6 C5 C10 C11 -160.7(8) . . . . ?
 C6 C7 C8 C9 8.7(15) . . . . ?
 C6 C7 C22 C21 -1.4(14) . . . . ?
 C7 C8 C9 C10 -0.7(18) . . . . ?
 C8 C7 C22 C21 164.8(9) . . . . ?
 C8 C9 C10 C5 -9.9(16) . . . . ?
 C8 C9 C10 C11 161.8(11) . . . . ?
 C9 C10 C11 C12 -164.4(13) . . . . ?
 C10 C5 C6 C1 153.2(9) . . . . ?
 C10 C5 C6 C7 -6.2(14) . . . . ?
 C10 C11 C12 C4 -8.7(9) . . . . ?
 C10 C11 C12 C13 154.9(9) . . . . ?
 C11 C12 C13 C14 -153.2(10) . . . . ?
 C12 C4 C5 C6 156.1(8) . . . . ?
 C12 C4 C5 C10 -2.1(10) . . . . ?
 C12 C13 C14 C15 -6.9(19) . . . . ?
 C13 C14 C15 C3 0.0(18) . . . . ?
 C13 C14 C15 C16 160.3(12) . . . . ?
 C14 C15 C16 C17 -150.9(14) . . . . ?
 C15 C3 C4 C5 151.3(9) . . . . ?
 C15 C3 C4 C12 -1.8(13) . . . . ?
 C15 C16 C17 C2 -10.1(9) . . . . ?
 C15 C16 C17 C18 158.0(9) . . . . ?
 C16 C17 C18 C19 -163.8(9) . . . . ?
 C17 C2 C3 C4 157.7(8) . . . . ?
 C17 C2 C3 C15 0.7(11) . . . . ?
 C17 C18 C19 C20 2.4(13) . . . . ?
 C17 C18 C19 C23 167.2(9) . . . . ?
 C18 C19 C20 C1 -2.7(13) . . . . ?
 C18 C19 C20 C21 160.6(8) . . . . ?
 C18 C19 C23 C24 24.1(16) . . . . ?
 C18 C19 C23 C28 -160.6(10) . . . . ?
 C19 C20 C21 C22 -160.2(8) . . . . ?
 C19 C20 C21 C28 7.6(9) . . . . ?
 C19 C23 C24 C25 179.1(8) . . . . ?
 C19 C23 C28 C21 -1.3(9) . . . . ?
 C19 C23 C28 C27 176.3(8) . . . . ?
 C20 C1 C2 C3 161.1(8) . . . . ?
 C20 C1 C2 C17 9.6(13) . . . . ?
 C20 C1 C6 C5 -160.8(8) . . . . ?
 C20 C1 C6 C7 -1.0(13) . . . . ?
 C20 C19 C23 C24 -169.5(9) . . . . ?
 C20 C19 C23 C28 5.8(9) . . . . ?
 C20 C21 C22 C7 -2.2(13) . . . . ?
 C20 C21 C28 C23 -3.5(9) . . . . ?
 C20 C21 C28 C27 179.2(9) . . . . ?
 C22 C7 C8 C9 -158.7(10) . . . . ?
 C22 C21 C28 C23 161.7(9) . . . . ?
 C22 C21 C28 C27 -15.6(16) . . . . ?
 C23 C19 C20 C1 -171.7(8) . . . . ?
 C23 C19 C20 C21 -8.4(10) . . . . ?
 C23 C24 C25 O1 178.2(8) . . . . ?
 C23 C24 C25 C26 1.2(13) . . . . ?
 C24 C23 C28 C21 174.4(8) . . . . ?
 C24 C23 C28 C27 -8.0(13) . . . . ?
 C24 C25 C26 O2 175.1(8) . . . . ?
 C24 C25 C26 C27 -3.0(14) . . . . ?
 C25 C26 C27 C28 -0.6(13) . . . . ?
 C26 C27 C28 C21 -176.9(8) . . . . ?
 C26 C27 C28 C23 6.0(13) . . . . ?
 C28 C21 C22 C7 -165.4(9) . . . . ?
 C28 C23 C24 C25 4.3(13) . . . . ?
 C29 O1 C25 C24 28.5(12) . . . . ?
 C29 O1 C25 C26 -154.4(8) . . . . ?
 C30 O2 C26 C25 -177.8(8) . . . . ?
 C30 O2 C26 C27 0.2(12) . . . . ?

loop_
  _refln_index_h
  _refln_index_k
  _refln_index_l
  _refln_F_squared_meas
  _refln_F_squared_sigma
 0 0 -5 2.14 2.36
 0 0 5 -0.36 2.12
 0 0 -5 4.43 2.41
 0 0 5 3.26 2.75
 0 0 -6 1801.31 58.65
 0 0 6 1783.01 57.05
 0 0 6 1746.98 59.64
 0 0 -6 1723.57 57.14
 0 0 7 14.18 4.21
 0 0 -7 9.54 3.6
 0 0 7 1.24 3.26
 0 0 -7 3.56 5.51
 0 0 8 1386.47 46.16
 0 0 8 1283.39 47.44
 0 0 -8 1370.36 52.53
 0 0 -8 1339.23 52.17
 0 0 -9 0 3.83
 0 0 9 0.9 4.25
 0 0 9 -1.89 5.24
 0 0 -9 1.49 3.74
 0 0 -10 1541.04 58.43
 0 0 10 1408.28 65.49
 0 0 -10 1521.87 57.19
 0 0 10 1570.64 58.29
 0 0 11 5.33 8.98
 0 0 11 5.18 4.64
 0 0 -11 2.72 5
 0 0 -11 -1.22 4.82
 0 0 12 680.19 32.14
 0 0 -12 656.36 28.58
 0 0 12 696.94 29.46
 0 0 -12 654.13 29.48
 0 0 -13 7.31 6.35
 0 0 13 14.92 7.63
 0 0 13 9.05 6.08
 0 0 -13 0.65 10.51
 0 0 -14 13.26 10.83
 0 0 14 3.69 7.97
 0 0 14 8.24 6.73
 0 0 -15 6.17 7.54
 0 0 15 8.08 8.24
 0 0 16 1817.74 110.12
 0 0 -16 1913.15 92.57
 0 0 17 8.64 18.46
 0 0 -17 -1.13 7.79
 0 0 -18 167.79 19.4
 0 0 18 226.03 30.05
 0 0 -19 21.97 18.43
 0 0 19 28.74 18.73
 0 0 20 63.4 22.93
 0 0 -20 41.01 13.37
 0 0 21 4.39 18.7
 0 0 -21 12.27 11.23
 0 0 22 98.04 40.42
 0 0 -22 43.73 16.18
 0 0 -23 -0.88 12.15
 0 0 23 10.83 14.49
 0 0 -24 25.48 15.37
 0 0 24 15.69 18.77
 0 0 25 1.13 16.56
 0 0 -25 13.19 22.87
 0 0 26 537.41 57.46
 0 0 -26 513.31 53.39
 0 0 -27 2.5 15.06
 0 0 27 -1.96 17.04
 0 0 -28 40.06 22.57
 0 0 28 27.64 38.19
 0 0 -29 10.11 18.25
 0 0 29 -1.89 19.9
 0 0 30 12.56 24.94
 0 0 -30 32.3 35.47
 0 0 -31 20.98 21.4
 0 0 31 -10.96 23.43
 0 0 -32 2.34 24.37
 0 0 32 23.52 25.86
 0 0 -33 11.3 24.94
 0 0 33 13.64 42.58
 0 0 -34 11.79 25.34
 0 0 34 2.36 28.49
 0 0 -35 -4.23 36.01
 0 0 35 -9.16 26.49
 0 0 -35 16.74 39.95
 0 0 36 -5.06 26.96
 0 0 -36 2.34 25.75
 0 0 -37 -1.24 29.33
 0 0 37 17.53 30.47
 1 0 -4 248.99 10.96
 -1 0 4 250.09 9.32
 -1 0 4 229.77 6.19
 1 0 4 280.43 10.85
 1 0 -4 241.11 6.53
 -1 0 -4 253.06 9.36
 -1 0 -4 253.81 8.42
 1 0 4 224.03 10.53
 -1 0 -5 -3.22 5.38
 1 0 -5 -4.75 2.77
 1 0 5 2.5 4.07
 1 0 5 -2.09 2.5
 -1 0 5 -0.14 1.67
 -1 0 5 5.63 4.7
 1 0 -5 -0.14 1.82
 -1 0 -5 1.51 3.04
 -1 0 6 88.88 7.04
 -1 0 -6 100.11 6.71
 -1 0 -6 110.6 7.45
 1 0 6 98.44 9.36
 1 0 6 98.35 6.89
 1 0 -6 105.76 7.49
 1 0 -6 92.95 6.84
 -1 0 6 105.69 5.11
 -1 0 -7 4.03 5.67
 1 0 7 2.75 3.29
 1 0 -7 -6.98 4.14
 -1 0 7 0.56 3.87
 -1 0 -7 3.13 3.15
 -1 0 7 -3.94 3.69
 1 0 7 -0.88 3.49
 1 0 -7 -4.37 5.33
 1 0 -8 18.39 5.74
 -1 0 -8 10.98 4.88
 1 0 8 18.55 7.43
 -1 0 8 7.88 4.91
 1 0 8 10.49 4.5
 -1 0 8 12.56 3.31
 -1 0 -8 8.69 6.91
 1 0 -8 6.46 7.31
 -1 0 -9 0.47 4.19
 1 0 9 -0.47 4.14
 -1 0 9 0.95 3.15
 1 0 -9 1.67 7.07
 1 0 9 14.83 9.7
 -1 0 9 8.15 7.31
 1 0 -9 2.93 3.56
 -1 0 -9 6.48 4.64
 -1 0 -10 5.38 4.64
 -1 0 10 -0.5 3.47
 1 0 10 1.22 10.2
 1 0 10 3.6 4.61
 1 0 -10 1.76 4.07
 -1 0 10 4.79 5.4
 1 0 -10 0.92 7.72
 -1 0 -10 -0.99 4.93
 1 0 -11 1.89 4.39
 1 0 11 6.1 4.93
 1 0 11 -13.14 11.5
 -1 0 11 5.49 6.03
 1 0 -11 -7.85 8.37
 -1 0 11 4.48 5.76
 -1 0 -11 -4.59 7.36
 -1 0 -11 -4.79 7.92
 1 0 -12 393.35 19.22
 -1 0 12 327.94 21.43
 -1 0 -12 374.42 19.85
 1 0 12 527.73 39.61
 -1 0 -12 330.33 19.87
 -1 0 12 341.45 17.65
 1 0 -12 311.04 27.44
 1 0 12 337.78 20.66
 -1 0 -13 1.62 6.28
 -1 0 13 4.41 7.22
 1 0 13 -7.9 14.81
 1 0 -13 -2.66 10.4
 -1 0 13 7.88 5.33
 1 0 13 4.41 6.12
 -1 0 -13 6.01 6.37
 1 0 -13 6.37 5.72
 -1 0 14 459.11 26.24
 -1 0 -14 474.75 35.83
 1 0 14 531.22 40.24
 1 0 -14 530.57 27.8
 -1 0 14 532.32 31.33
 -1 0 -14 500.64 28.97
 1 0 -15 6.91 10.92
 -1 0 15 6.03 6.8
 -1 0 -15 8.44 8.08
 1 0 15 12.4 13.05
 -1 0 15 11.01 8.94
 -1 0 16 403.27 30.18
 -1 0 -16 417.32 39.63
 1 0 -16 454.7 35
 1 0 16 460.57 30.7
 1 0 -17 5.13 7.52
 -1 0 17 -0.65 15.39
 1 0 17 7.07 9.43
 -1 0 -17 4.75 9.03
 1 0 -18 11.73 8.8
 1 0 18 14.29 10.74
 -1 0 -18 20.57 10.69
 -1 0 18 1.24 11.91
 1 0 -19 0.7 8.46
 -1 0 -19 -0.86 10.44
 1 0 19 9.81 10.96
 -1 0 19 13.3 11.19
 1 0 20 26.29 13.8
 -1 0 20 22.01 14.49
 -1 0 -20 19.92 13.19
 1 0 -20 16.99 11.37
 -1 0 21 8.76 20.23
 -1 0 -21 7.22 12.56
 1 0 21 -4.21 12.96
 1 0 -21 15.44 10.53
 1 0 22 46.79 29.08
 -1 0 -22 67.14 26.85
 1 0 -22 40.69 24.01
 -1 0 22 80.96 28.25
 1 0 23 -0.11 21.4
 -1 0 23 -12.78 20.41
 1 0 -23 -10.26 12.06
 -1 0 -23 3.78 12.65
 1 0 -24 116.16 24.82
 -1 0 -24 132.68 25.43
 1 0 24 122.68 27.05
 -1 0 24 195.36 40.98
 1 0 25 -0.99 15.35
 -1 0 25 3.51 23.14
 -1 0 -25 8.46 14.18
 1 0 -25 1.46 13.59
 -1 0 -26 18.03 17.35
 1 0 26 10.06 18.66
 1 0 -26 11.88 16.99
 -1 0 26 30.02 43.75
 -1 0 27 20.17 20.95
 1 0 27 1.49 19.92
 1 0 -27 2.59 26.99
 -1 0 -27 37.97 29.26
 1 0 28 32.72 22.89
 -1 0 -28 28.22 21.81
 1 0 -28 36.98 32.72
 -1 0 28 10.17 24.85
 -1 0 29 6.62 19.76
 -1 0 -29 -0.92 17.06
 1 0 -29 -3.2 16.99
 1 0 29 8.26 28.11
 1 0 -30 34.59 23.43
 1 0 30 22.6 27.05
 -1 0 -30 7.31 24.6
 -1 0 30 36.44 27.57
 1 0 31 -24.42 21.18
 1 0 -31 -7.76 18.1
 -1 0 31 6.95 33.04
 -1 0 -31 25.12 19.24
 -1 0 32 7.9 23.14
 1 0 -32 -14.04 19.6
 1 0 32 7.11 22.71
 -1 0 -32 -6.08 33.35
 1 0 -33 -1.6 40.26
 -1 0 -33 25.81 25.23
 1 0 33 10.78 27.46
 -1 0 33 -3.47 27.62
 1 0 -34 11.82 28.76
 -1 0 -34 34.1 28.25
 1 0 34 26.31 31.42
 -1 0 34 -1.53 31.17
 1 0 -35 -21.38 25.09
 -1 0 35 14.09 26.96
 1 0 35 2.14 26.69
 -1 0 -35 -8.12 25.75
 1 0 36 18.88 31.06
 1 0 -36 2.72 29.6
 -1 0 -36 24.17 30.02
 -1 0 36 29.8 50.57
 1 0 37 -8.44 27.46
 -1 0 37 18.88 29.93
 -1 0 -37 8.55 45.49
 2 0 3 1.26 4.03
 -2 0 -3 3.26 2.16
 -2 0 3 3.42 0.63
 -2 0 -3 2.72 2.54
 2 0 -3 2.16 0.81
 2 0 3 7.63 2.14
 2 0 4 9.5 3.13
 2 0 -4 13.91 2.21
 2 0 4 11.64 3.56
 -2 0 -4 3.83 4.37
 -2 0 4 15.1 1.76
 -2 0 -4 17.01 3.89
 -2 0 4 20.1 4.25
 -2 0 -5 -6.37 4.55
 2 0 -5 3.85 1.46
 2 0 5 5.15 3.06
 -2 0 -5 6.75 5.65
 -2 0 5 0.45 6.05
 2 0 -5 3.31 3.65
 2 0 5 1.78 3.31
 -2 0 -5 -5.92 4.55
 -2 0 5 2.07 1.35
 -2 0 -6 123.04 9.45
 2 0 6 99.21 8.57
 -2 0 6 110.87 5.04
 2 0 -6 160.72 5.42
 2 0 6 164.3 8.46
 -2 0 6 113.39 9.39
 2 0 -6 95.07 8.76
 -2 0 -6 115.66 7.58
 2 0 7 2.86 3.49
 -2 0 7 -0.34 2.03
 2 0 7 -2.21 3.94
 2 0 -7 -4.25 4.14
 -2 0 7 -7.38 4.57
 2 0 -7 5.69 3.29
 -2 0 -7 2.9 4.46
 -2 0 -7 5.06 3.51
 2 0 -8 12.99 6.08
 2 0 -8 19.9 3.33
 -2 0 8 26.63 9.79
 -2 0 8 20.46 3.33
 2 0 8 22.37 5.58
 -2 0 -8 17.04 6.08
 -2 0 -8 37.68 7.34
 2 0 8 20.68 8.19
 2 0 -9 10.76 5.18
 -2 0 9 2.39 5.4
 -2 0 9 3.62 4.34
 2 0 9 4.32 4.82
 2 0 9 2.34 4.79
 2 0 -9 0.09 3.04
 -2 0 -9 1.58 8.12
 -2 0 -9 5.15 4.48
 2 0 10 11.84 5.94
 -2 0 10 7.13 3.62
 -2 0 -10 13.32 6.14
 -2 0 10 7.72 6.39
 2 0 10 3.51 5.67
 2 0 -10 14.63 3.8
 2 0 -10 9.77 6.3
 -2 0 -10 12.4 8.57
 2 0 -11 4.23 3.94
 2 0 11 6.91 9.03
 -2 0 11 2.97 3.62
 -2 0 -11 -0.07 6.14
 2 0 11 13.5 8.24
 -2 0 11 1.4 6.12
 2 0 -11 3.62 6.44
 -2 0 -11 5.47 5.4
 2 0 -12 37.43 10.22
 -2 0 -12 30.47 13.17
 2 0 12 51.34 8.73
 -2 0 12 58.27 10.11
 2 0 -12 45.4 6.46
 2 0 12 49.54 14.7
 -2 0 12 47.47 9.48
 -2 0 -12 62.68 9.61
 -2 0 -13 -6.03 6.3
 -2 0 -13 14.76 10.56
 -2 0 13 -3.56 11.03
 2 0 13 0.45 6.21
 -2 0 13 4.5 4.77
 2 0 -13 5.29 4.66
 -2 0 -14 9.68 7.45
 -2 0 -14 6.35 7.88
 2 0 14 0.54 7.52
 -2 0 14 9.7 5.65
 -2 0 14 6.84 8.91
 2 0 -14 10.83 5.78
 -2 0 15 -3.06 5.38
 2 0 15 -0.14 6.91
 2 0 -15 -0.41 5.54
 -2 0 15 -1.28 8.12
 -2 0 -15 1.94 7.47
 -2 0 16 7.36 10.22
 2 0 -16 11.14 7.11
 -2 0 -16 12.54 9.61
 2 0 16 6.93 9.12
 -2 0 16 14.94 10.83
 -2 0 17 2.23 10.17
 2 0 -17 6.28 10.85
 -2 0 -17 6.28 8.89
 2 0 17 1.94 8.69
 2 0 18 5.58 10.78
 -2 0 18 15.39 12.42
 2 0 -18 22.39 14.09
 -2 0 -18 31.19 17.29
 2 0 19 6.26 10.22
 -2 0 -19 -4.55 11.05
 -2 0 19 9.81 11.73
 2 0 -19 3.78 8.51
 -2 0 -20 -4.97 11.28
 -2 0 20 5.85 11.59
 2 0 -20 6.66 9.03
 2 0 20 0.38 10.62
 2 0 -21 -1.98 9.34
 -2 0 21 12.74 20.14
 2 0 21 -0.43 11.19
 -2 0 -21 6.5 11.97
 2 0 22 19.9 22.42
 -2 0 22 30.63 16.88
 -2 0 -22 8.94 15.08
 2 0 -22 12.2 12.78
 2 0 23 15.26 22.84
 2 0 -23 4.59 12.11
 -2 0 -23 20.03 23.27
 -2 0 23 3.87 16.27
 -2 0 24 22.03 20.37
 2 0 24 36.98 19.33
 -2 0 -24 38.76 17.31
 2 0 -24 15.17 24.62
 2 0 25 3.15 17.26
 2 0 -25 -2.07 22.3
 -2 0 -25 10.85 15.8
 -2 0 25 57.44 39.95
 2 0 26 52.71 23.2
 -2 0 26 65.22 35.18
 2 0 -26 36.48 19.36
 -2 0 -26 21.25 21.2
 2 0 27 -7.58 18.43
 2 0 -27 -2.54 15.51
 -2 0 -27 -10.15 16.86
 -2 0 27 12.15 27.62
 -2 0 28 -1.89 33.26
 2 0 28 23.95 22.28
 -2 0 -28 54.67 31.24
 2 0 -28 -0.83 18.68
 -2 0 29 2.34 50.46
 -2 0 -29 -4.37 21.22
 2 0 29 15.73 21.92
 2 0 -29 15.64 18.46
 2 0 30 1.69 35.04
 2 0 -30 -12.47 30.07
 -2 0 30 16.38 24.35
 2 0 30 6.28 35.63
 -2 0 -30 15.93 21.47
 2 0 -31 18.61 22.03
 -2 0 -31 -6.19 23.02
 -2 0 31 2.84 25.27
 2 0 31 15.26 23.65
 2 0 32 -6.17 22.73
 2 0 -32 -15.75 21.67
 -2 0 32 -5.15 25.27
 -2 0 -32 14.97 22.17
 -2 0 33 -12.58 26.02
 -2 0 -33 16.97 37.77
 2 0 33 4.88 24.8
 2 0 -33 8.8 22.03
 -2 0 34 12.74 49.92
 2 0 34 31.53 29.96
 2 0 -34 13.28 27.95
 -2 0 -34 3.4 46.32
 2 0 -35 9.63 39.79
 2 0 35 6.44 27.84
 -2 0 35 31.33 30.52
 -2 0 -35 -7.74 28.88
 -2 0 -36 -19.06 26.65
 2 0 36 26.69 41.88
 -2 0 36 -2.05 29.3
 -2 0 -37 22.82 29.89
 2 0 37 -7.83 30.61
 -2 0 37 14.22 31.76
 -3 0 0 1.62 1.76
 3 0 0 2.63 3.62
 -3 0 0 -5.72 2.43
 3 0 0 1.42 2.36
 3 0 -1 0.41 4.48
 -3 0 -1 3.71 3.67
 3 0 1 -2.45 2.03
 3 0 -1 2.52 2.03
 3 0 1 3.65 3.69
 -3 0 -1 -0.59 3.4
 -3 0 1 1.98 2.72
 -3 0 1 2 1.33
 3 0 2 7.83 2.66
 -3 0 -2 7.76 2.97
 -3 0 -2 0.92 2.63
 3 0 2 4.34 2.86
 -3 0 2 10.62 3.42
 -3 0 2 9.54 1.78
 -3 0 -3 6.26 5.15
 -3 0 -3 4.21 2.63
 -3 0 3 -2.36 4.5
 3 0 3 5.27 2.72
 3 0 3 4.23 3.35
 3 0 4 -3.42 3.67
 -3 0 4 2.21 1.26
 -3 0 -4 4.3 3.62
 3 0 4 3.29 4.68
 -3 0 -4 4.03 3.06
 -3 0 5 2.39 1.4
 -3 0 5 8.69 4.34
 -3 0 -5 0.88 3.15
 3 0 5 0.99 3.22
 3 0 5 -0.07 3.85
 3 0 -5 -0.86 1.28
 -3 0 -5 -1.73 3.89
 3 0 6 5.74 5.65
 -3 0 -6 15.01 7.58
 3 0 6 -0.09 4.39
 -3 0 -6 4.34 3.56
 -3 0 6 5.13 4.97
 -3 0 6 0.34 1.91
 3 0 -6 2.09 1.67
 3 0 -7 -0.29 1.82
 -3 0 -7 2.7 5.49
 -3 0 7 4.61 4.97
 3 0 7 0.92 3.89
 -3 0 7 -0.56 1.51
 -3 0 -7 4.77 4.77
 3 0 7 4.12 4.61
 -3 0 -7 5.24 5.49
 -3 0 -8 1.94 5.06
 -3 0 8 0.11 4.91
 -3 0 -8 2.45 3.62
 3 0 -8 -2.97 2.18
 3 0 8 3.22 3.74
 3 0 8 -0.45 4.82
 3 0 -8 -0.65 7.38
 -3 0 8 1.71 2.93
 -3 0 -9 7.2 4.59
 3 0 9 -2.48 5.83
 -3 0 -9 8.33 5.47
 3 0 -9 7.81 2.63
 -3 0 9 -2.54 2.45
 3 0 9 6.41 4.52
 3 0 -9 -0.38 5.54
 -3 0 9 -7.76 6.14
 -3 0 -10 21.54 11.01
 -3 0 10 13.44 4.7
 3 0 10 -0.16 6.93
 -3 0 -10 14.94 8.35
 3 0 -10 7.67 6.89
 -3 0 10 15.71 7.43
 3 0 10 5.76 6.17
 3 0 -10 12.96 3.67
 -3 0 11 7.02 6.73
 3 0 11 4.48 5.92
 3 0 -11 3.47 6.55
 -3 0 -11 11.97 6.62
 3 0 -11 5.18 5.6
 -3 0 -11 -0.86 7.94
 -3 0 11 0.23 3.17
 -3 0 -12 9.59 6.48
 3 0 -12 14.43 6.5
 -3 0 12 7.07 5.9
 -3 0 12 3.17 7.36
 3 0 12 0.43 6.44
 -3 0 -12 0.34 7.54
 3 0 13 2.03 6.23
 -3 0 13 1.96 3.89
 -3 0 -13 -1.55 7.04
 3 0 -13 -1.24 6.62
 -3 0 13 1.33 11.37
 -3 0 -14 29.62 10.4
 -3 0 -14 30.09 9.25
 -3 0 14 25.07 6.17
 3 0 -14 27.35 6.57
 -3 0 14 33.85 10.89
 3 0 14 34.46 9.09
 3 0 -15 6.93 5.6
 -3 0 -15 -10.6 12.09
 -3 0 15 -1.19 8.62
 3 0 15 2.7 7.76
 -3 0 15 4.46 5.15
 -3 0 -15 -2.3 13.17
 3 0 16 4.03 8.46
 -3 0 -16 6.1 9.03
 -3 0 16 11.1 9.05
 3 0 -16 3.31 6.28
 -3 0 16 -21.54 14.72
 -3 0 17 0.23 6.46
 3 0 -17 3.6 9.84
 -3 0 17 -1.69 9.72
 3 0 17 -2.05 8.24
 -3 0 -17 -3.6 8.98
 3 0 18 17.67 15.98
 3 0 -18 -1.53 11.88
 -3 0 18 4.57 11.84
 -3 0 -18 8.39 10.53
 -3 0 19 -14 11.19
 3 0 19 15.48 15.75
 -3 0 -19 9.84 10.6
 3 0 -19 3.85 12.38
 -3 0 20 25.91 15.71
 3 0 -20 10.67 10.53
 3 0 20 34.66 21.25
 -3 0 -20 31.69 22.55
 -3 0 -21 5.87 13.64
 3 0 21 -3.74 12.72
 -3 0 21 13.95 14.36
 3 0 -21 9.57 9.97
 -3 0 -22 12.85 12.58
 3 0 -22 -3.89 9.48
 3 0 22 0.56 11.95
 -3 0 22 -8.87 13.1
 3 0 23 7.81 14.85
 -3 0 -23 14.7 15.39
 3 0 -23 6.48 12.31
 -3 0 23 16.36 24.87
 3 0 24 3.2 14.31
 3 0 -24 7.56 12.02
 -3 0 24 5.92 16.74
 -3 0 -24 -8.62 15.64
 3 0 -25 16.59 15.42
 -3 0 25 20.46 21.16
 3 0 25 24.89 18.86
 -3 0 -25 3.8 28.81
 -3 0 -26 15.93 19.51
 3 0 26 32.23 20.08
 -3 0 26 1.15 22.19
 3 0 -26 24.17 25.45
 3 0 -27 5.27 17.47
 -3 0 27 6.64 20.77
 -3 0 -27 12.02 18.66
 3 0 27 9.63 19.47
 -3 0 28 1.4 51.79
 3 0 -28 11.01 19.13
 3 0 28 10.35 21.61
 -3 0 -28 21.18 20.73
 -3 0 29 18.05 34.95
 -3 0 -29 16.61 21.97
 3 0 29 16.83 22.98
 3 0 -29 10.53 20.98
 3 0 30 -12.81 21.09
 -3 0 -30 29.6 33.04
 3 0 -30 -2.52 18.48
 -3 0 30 -12.24 32.77
 -3 0 -31 0.45 20.39
 3 0 31 2.18 31.17
 3 0 -31 -6.28 18.16
 -3 0 31 15.26 30.77
 -3 0 32 9.34 62.95
 -3 0 -32 21.09 26.85
 3 0 -32 21.38 36.78
 3 0 32 1.82 27.77
 -3 0 -33 -7.4 25.61
 -3 0 33 -13.95 28.74
 3 0 -33 3.83 23.05
 3 0 33 -10.69 27.23
 3 0 34 7.43 27.82
 -3 0 34 14.36 29.75
 -3 0 -34 -2.21 27.57
 -3 0 35 20.41 28.61
 3 0 35 -18.1 26.94
 -3 0 -35 -15.69 41.77
 3 0 36 11.55 29.82
 -3 0 -36 -0.41 30.77
 -3 0 36 33.24 51.43
 -3 0 -37 -6.98 26.29
 -3 0 37 9.61 27.86
 -4 0 0 199.03 10.13
 4 0 0 263.44 10.96
 -4 0 0 295.22 16.09
 4 0 0 195.69 9.59
 4 0 1 -1.71 2.68
 -4 0 -1 9.61 3.33
 -4 0 -1 1.46 2.79
 -4 0 1 3.42 3.92
 4 0 -1 2.75 2
 4 0 1 3.62 3.47
 4 0 -1 -3.17 3.83
 4 0 -2 8.42 5.31
 -4 0 -2 10.31 3.51
 -4 0 2 5.92 2.63
 4 0 2 4.43 3.51
 -4 0 2 8.44 4.14
 4 0 2 10.8 3.49
 -4 0 -2 9.54 3.53
 -4 0 3 -0.14 0.29
 -4 0 3 -2.99 6.05
 -4 0 -3 8.46 5.22
 -4 0 -3 -0.88 3.17
 4 0 3 -0.02 3.15
 4 0 3 0.11 2.97
 -4 0 3 -0.23 1.1
 4 0 4 23.59 4.32
 -4 0 -4 22.55 4.37
 -4 0 -4 12.18 5.11
 -4 0 4 26.45 5.83
 -4 0 5 10.04 1.62
 4 0 5 9.45 5.15
 -4 0 -5 -1.24 5.13
 -4 0 -5 6.55 4.32
 4 0 5 21.85 6.82
 -4 0 6 54.78 2.54
 -4 0 6 44.5 8.69
 4 0 6 32.12 8.19
 4 0 6 65.92 6.57
 -4 0 -6 46.32 7.54
 -4 0 -6 56.92 6.46
 -4 0 -7 -0.61 3.69
 4 0 7 4.82 5
 -4 0 7 -0.9 1.71
 4 0 7 -0.77 4.14
 -4 0 7 3.26 5.65
 -4 0 -7 0.68 5.09
 4 0 -7 -0.38 2.48
 4 0 8 -0.36 4.95
 4 0 -8 0.25 2.36
 -4 0 -8 9.27 6.17
 4 0 8 -5.15 5.85
 -4 0 -8 13.77 6.91
 -4 0 8 17.06 6.39
 4 0 9 7.9 5.42
 -4 0 9 4.25 2.14
 4 0 -9 6.14 4.1
 -4 0 -9 -2.23 5.18
 -4 0 9 -0.65 7.09
 -4 0 -9 8.39 6.75
 4 0 9 1.46 6.77
 -4 0 10 146.65 21.34
 -4 0 10 115.64 8.98
 -4 0 -10 152.1 15.08
 -4 0 -10 119.64 11.57
 4 0 -10 159.28 10.24
 4 0 10 164.21 17.76
 4 0 11 5.49 5.85
 -4 0 11 6.55 7.76
 -4 0 11 -0.02 2.68
 -4 0 -11 -0.97 10.53
 4 0 -11 0.11 3.08
 -4 0 -11 5.33 5.58
 -4 0 -12 49.94 18.77
 4 0 -12 43.17 8.15
 -4 0 12 37.77 11.57
 -4 0 12 31.96 7.02
 -4 0 -12 33.96 11.05
 4 0 12 46.66 8.73
 -4 0 13 8.48 4.07
 -4 0 -13 2.05 10.42
 -4 0 -13 16.5 8.87
 4 0 13 5.38 7.29
 4 0 -13 5.24 4.82
 -4 0 13 13.41 9.34
 4 0 -14 58.25 7.38
 -4 0 -14 41.59 11.03
 -4 0 -14 39.48 12.58
 -4 0 14 34.64 6.46
 4 0 14 50.77 10.44
 -4 0 14 49.22 12.74
 -4 0 15 2.88 4.55
 4 0 -15 -0.52 5.27
 -4 0 15 4.57 13.35
 -4 0 -15 11.68 12.09
 4 0 15 3.74 11.77
 -4 0 -15 -10.11 8.8
 -4 0 -16 16.38 15.82
 -4 0 16 8.76 10.76
 -4 0 16 6.95 9.16
 4 0 -16 2.16 6.66
 4 0 16 6.55 9.23
 -4 0 17 4.84 6.26
 4 0 -17 -2.54 6.98
 -4 0 -17 5.22 10.42
 4 0 17 -0.32 9.25
 -4 0 17 12.92 10.74
 4 0 -18 -4.7 7.11
 -4 0 18 -1.24 6.39
 -4 0 -18 8.1 9.93
 4 0 18 -1.96 9.14
 -4 0 18 4.28 10.02
 -4 0 19 -1.13 12.9
 -4 0 -19 3.58 11.82
 4 0 19 8.94 11.16
 4 0 -19 9.21 8.87
 4 0 20 7.74 12.72
 -4 0 -20 15.73 13.17
 4 0 -20 7.61 9.81
 -4 0 20 -2.93 14.22
 4 0 -21 1.28 9.79
 4 0 21 0.27 12.58
 -4 0 -21 9.05 21.04
 -4 0 21 5.24 14.16
 4 0 22 25.32 16.07
 -4 0 22 18.61 27.95
 -4 0 -22 8.62 17.65
 4 0 -22 21.85 13.44
 -4 0 -23 14.99 16.02
 4 0 -23 -4.28 12.24
 -4 0 23 14.38 15.87
 4 0 23 -1.33 15.08
 4 0 -24 10.92 14.02
 -4 0 24 19.63 18.57
 -4 0 -24 -1.37 17.78
 4 0 24 5.11 17.01
 -4 0 25 -6.23 16.74
 -4 0 -25 -15.1 16.47
 4 0 -25 -6.77 13.01
 4 0 25 25.61 15.62
 -4 0 26 17.22 29.6
 4 0 26 -2.7 17.13
 -4 0 -26 4.55 25.88
 4 0 -26 0.79 14.2
 4 0 27 -12.58 18.01
 4 0 -27 1.85 22.35
 -4 0 27 26.24 18.95
 -4 0 -27 -13.17 16.65
 4 0 28 13.39 21.31
 -4 0 -28 8.46 20.14
 4 0 -28 -0.81 28.27
 -4 0 28 1.55 23.09
 -4 0 29 -4.91 21.04
 4 0 -29 9.54 16.99
 4 0 29 -7.52 20.3
 -4 0 -29 -4.73 18.95
 4 0 30 -6.17 20.8
 -4 0 -30 5.85 19.99
 4 0 -30 -7.94 17.74
 -4 0 30 48.01 48.97
 4 0 -31 10.53 22.03
 -4 0 -31 41.82 39.88
 4 0 31 3.11 26.13
 -4 0 31 -0.68 39.9
 -4 0 -32 25.63 30.16
 -4 0 32 31.71 46.34
 4 0 32 15.26 47.65
 -4 0 -33 -5.11 24.06
 -4 0 33 10.85 36.66
 4 0 33 4.16 35.9
 -4 0 34 24.91 66.42
 -4 0 -34 -8.78 28.09
 4 0 34 15.53 26.72
 4 0 35 14.67 27.73
 -4 0 -35 13.26 31.35
 -4 0 35 2.32 33.96
 -4 0 -36 21.25 56.58
 -4 0 36 30.23 39.52
 -4 0 37 5.67 29.51
 -4 0 -37 -3.42 27.39
 -5 0 0 -2.54 4.23
 5 0 0 7.65 3.94
 5 0 0 0.88 2.81
 -5 0 0 3.22 4.14
 -5 0 1 -0.65 2.61
 5 0 -1 8.42 4.39
 -5 0 -1 4.21 3.13
 5 0 1 2.63 3.98
 -5 0 1 -3.33 7.09
 5 0 -1 3.08 3.76
 5 0 1 6.14 4.73
 -5 0 -1 6.23 4.16
 5 0 2 90.72 7.43
 5 0 -2 103.8 4.86
 -5 0 -2 107.9 11.19
 5 0 2 118.63 11.46
 -5 0 -2 109.85 7.36
 5 0 -2 101.44 9.09
 -5 0 2 109.13 9.27
 -5 0 3 1.53 1.58
 5 0 3 -1.01 3.87
 -5 0 -3 11.52 6.08
 -5 0 -3 5.47 3.83
 5 0 3 2.88 3.83
 -5 0 3 14.02 7.74
 -5 0 -4 24.98 5.51
 -5 0 4 16.77 6.64
 5 0 4 24.26 4.75
 -5 0 -4 13.55 5
 -5 0 4 24.76 2.52
 5 0 4 20.39 5.49
 5 0 5 1.35 4.25
 -5 0 5 0.52 1.22
 -5 0 -5 -2.52 4.39
 -5 0 -5 -3.96 6.3
 -5 0 5 -0.29 1.4
 5 0 5 -7.94 5.76
 -5 0 5 -5.51 5.22
 -5 0 -6 11.82 5.15
 -5 0 6 6.17 9.79
 -5 0 6 3.58 1.51
 5 0 6 -1.82 4.86
 5 0 6 6.86 5.24
 -5 0 6 -7.07 7.16
 -5 0 -6 -2.36 4.64
 5 0 -7 -0.02 0.25
 -5 0 -7 7.25 8.44
 -5 0 -7 8.21 6.75
 5 0 7 -0.45 4.32
 -5 0 7 -10.04 6.08
 -5 0 7 -0.5 1.26
 5 0 7 -3.74 8.01
 -5 0 -8 84.51 8.39
 -5 0 8 80.53 2.79
 -5 0 -8 82.44 11.03
 -5 0 8 78.1 11.88
 5 0 8 85.77 9.05
 5 0 9 -3.85 5.45
 -5 0 -9 1.15 6.73
 -5 0 9 -0.99 7.31
 5 0 -9 -0.92 3.17
 -5 0 -9 3.4 4.95
 -5 0 9 0.7 2.14
 -5 0 10 108.93 14
 5 0 10 129.1 17.42
 -5 0 -10 108.75 10.62
 -5 0 10 105.58 6.3
 -5 0 -10 127.59 13.93
 5 0 -10 90.59 7.7
 -5 0 11 3.33 2.32
 5 0 -11 2.12 3.62
 -5 0 -11 6.23 6.41
 -5 0 -11 12.67 12.92
 -5 0 11 5.09 8.69
 5 0 11 14.56 6.91
 -5 0 -12 304.45 24.31
 5 0 -12 288.44 13.14
 -5 0 12 262.81 14.11
 -5 0 -12 311.47 19.9
 5 0 12 335.46 20.8
 -5 0 12 317.59 25.72
 5 0 -13 4.3 6.35
 -5 0 -13 -0.2 7.52
 -5 0 13 -0.2 9.66
 5 0 13 1.08 7.43
 -5 0 13 5.58 3.26
 -5 0 -13 9.25 8.8
 -5 0 14 24.78 17.65
 -5 0 -14 21.27 10.71
 5 0 14 18.12 13.64
 -5 0 -14 27.62 19.06
 -5 0 14 9.07 4.32
 5 0 -14 15.69 5.33
 -5 0 -15 -0.36 11.32
 5 0 15 2.77 7.74
 5 0 -15 0.34 7.49
 -5 0 15 12.15 9.39
 -5 0 15 -0.2 6.21
 -5 0 -15 -6.5 9.12
 -5 0 -16 8.82 16.2
 5 0 16 0.99 9.18
 5 0 -16 0.02 8.6
 -5 0 16 6.66 10.71
 -5 0 16 4.32 5.13
 -5 0 -17 0.02 10.98
 5 0 17 8.21 15.08
 -5 0 17 5.6 17.78
 5 0 -17 5.38 6.28
 -5 0 17 0.97 5.69
 -5 0 18 6.3 13.05
 -5 0 -18 16.59 12.47
 -5 0 18 5.06 10.31
 5 0 -18 4.61 7.54
 5 0 18 -0.11 15.82
 5 0 19 4.1 9.95
 5 0 -19 0.65 7.34
 -5 0 19 -1.4 12.27
 -5 0 -19 -8.76 11.7
 -5 0 19 7.43 9.75
 5 0 20 41.91 14.09
 -5 0 -20 21.04 16.09
 -5 0 20 27.73 25.32
 5 0 -20 25.7 10.76
 -5 0 20 19.67 9.27
 5 0 21 -5.96 12.02
 -5 0 -21 27.66 20.28
 -5 0 21 3.96 15.15
 5 0 -21 2.99 9.66
 5 0 -22 10.83 11.61
 -5 0 22 -0.2 17.47
 5 0 22 4.79 14.72
 -5 0 -22 23.83 17.13
 -5 0 23 2.36 16.65
 5 0 -23 2.68 11.59
 5 0 23 3.8 14.22
 -5 0 -23 3.92 16.2
 5 0 -24 15.42 14.49
 -5 0 -24 11.57 19.9
 -5 0 24 27.82 32.36
 5 0 24 13.05 17.6
 -5 0 25 9.3 20.37
 5 0 25 -7.7 16.88
 5 0 -25 5.15 14.38
 -5 0 -25 23.16 19.09
 5 0 -26 15.08 16.05
 -5 0 -26 6.86 21.47
 5 0 26 6.39 19.24
 -5 0 26 10.8 21.72
 5 0 27 -2.36 18.84
 -5 0 -27 -3.58 29.42
 -5 0 27 4.21 20.98
 5 0 -27 9.72 15.69
 -5 0 28 12.24 39.7
 5 0 -28 30.95 28.79
 -5 0 -28 4.32 23
 5 0 28 10.06 22.3
 -5 0 29 11.19 25.34
 5 0 29 -5.27 21.94
 -5 0 -29 -13.95 22.19
 5 0 -29 -20.05 30.99
 -5 0 -30 5.15 23.56
 -5 0 30 2.54 26.67
 5 0 30 11.7 23.63
 5 0 31 1.91 22.3
 -5 0 -31 6.46 23.27
 -5 0 31 -1.51 26.09
 5 0 32 28.29 29.82
 -5 0 -32 13.35 47.53
 -5 0 32 30 74.45
 -5 0 33 -16.32 41.91
 5 0 33 4.05 39.34
 -5 0 -33 -3.83 27.05
 -5 0 -34 0.59 28.22
 5 0 34 -8.01 42.54
 -5 0 34 23.07 43.28
 -5 0 35 4.14 49.67
 -5 0 -35 19.31 33.31
 -5 0 -36 -7.61 29.82
 -5 0 36 38.67 51.16
 -6 0 0 36.44 7.45
 6 0 0 49.83 7.47
 6 0 0 42.31 9.97
 -6 0 0 46.63 4.77
 6 0 1 2.77 3.78
 -6 0 1 6.35 5.63
 6 0 -1 2.57 2.99
 6 0 1 11.91 7.11
 6 0 -1 2.07 4.73
 -6 0 -1 -0.63 3.47
 -6 0 1 2.25 4.32
 -6 0 -1 -1.22 4.91
 6 0 -2 71.32 4.93
 -6 0 2 84.08 4.84
 6 0 2 75.8 6.8
 -6 0 -2 77.51 9.86
 -6 0 2 75.6 9.48
 6 0 -2 78.93 8.96
 -6 0 -2 67.95 8.01
 6 0 2 65.38 7.88
 -6 0 -3 1.4 4.5
 -6 0 3 6.21 5.36
 -6 0 3 1.4 2.16
 -6 0 -3 3.31 4.25
 6 0 3 -2.81 4.32
 6 0 3 4.16 4.19
 -6 0 4 158.38 18.57
 6 0 4 140.98 10.08
 6 0 4 162.14 15.8
 -6 0 4 152.19 6.35
 -6 0 -4 152.39 10.4
 -6 0 -4 156.89 11.41
 -6 0 5 1.49 1.89
 -6 0 -5 -1.6 4.79
 6 0 5 -1.42 4.21
 -6 0 5 -7.2 6.17
 6 0 5 8.15 5.06
 -6 0 -5 7.85 7.36
 -6 0 -6 193.4 12.67
 6 0 6 166.48 11.52
 -6 0 -6 176.83 13.48
 -6 0 6 195.24 15.28
 -6 0 6 178.99 5.96
 -6 0 6 195.29 5.27
 6 0 6 188.94 13.73
 -6 0 -7 0.9 5.27
 -6 0 -7 1.24 6.35
 -6 0 7 0.7 1.4
 6 0 7 1.73 5.92
 6 0 7 5.4 4.79
 -6 0 7 0.86 1.31
 -6 0 7 6.53 7.2
 -6 0 8 69.66 2.61
 6 0 8 64.05 9.72
 -6 0 -8 65.13 13.93
 -6 0 8 57.23 12.45
 -6 0 -8 67.72 11.57
 -6 0 9 -0.59 1.51
 -6 0 9 0.72 8.08
 -6 0 -9 4.7 7.18
 6 0 9 2 5.72
 -6 0 -9 8.89 5.36
 -6 0 -10 254.53 17.69
 -6 0 10 252.14 23.63
 6 0 10 248.36 25.18
 -6 0 -10 249.91 21.92
 -6 0 10 279.19 8.37
 -6 0 11 5.49 8.71
 -6 0 -11 1.64 6.26
 -6 0 -11 14.38 12.6
 6 0 11 -2.75 6.77
 -6 0 11 0.18 2.52
 6 0 -11 0.72 3.22
 6 0 12 244.26 19.31
 -6 0 12 247.3 22.93
 -6 0 -12 253.92 22.3
 -6 0 -12 252.03 18.73
 -6 0 12 249.71 10.33
 6 0 -12 232.29 10.33
 6 0 13 -3.33 11.5
 -6 0 13 -0.27 2.57
 -6 0 -13 -1.46 9.32
 -6 0 13 27.23 14.92
 6 0 -13 -2.3 5.87
 -6 0 -13 -6.68 6.86
 -6 0 -14 233.82 24.15
 -6 0 14 246.81 26.33
 6 0 -14 208.84 16.65
 -6 0 -14 262.92 29.39
 -6 0 14 277.55 14.92
 6 0 14 239.81 21.45
 -6 0 15 -6.41 11.66
 6 0 -15 1.42 5.11
 -6 0 15 1.78 3.71
 -6 0 -15 11.82 10.53
 6 0 15 -0.72 8.55
 -6 0 -16 41.34 14.97
 6 0 -16 23.38 12.2
 -6 0 16 34.84 15.01
 -6 0 16 29.26 5.9
 6 0 16 37.68 17.87
 6 0 -17 -6.86 5.87
 -6 0 17 8.01 12.24
 -6 0 17 -4.68 7.79
 -6 0 -17 2.07 17.94
 6 0 17 2.45 9.45
 -6 0 18 13.53 13.71
 -6 0 18 3.35 5.56
 6 0 18 5.72 10.71
 -6 0 -18 10.31 13.1
 6 0 -18 6.41 6.71
 6 0 -19 1.53 6.66
 -6 0 -19 10.11 12.04
 -6 0 19 -0.63 13.19
 -6 0 19 -1.17 5.42
 6 0 19 -0.86 10.06
 -6 0 20 13.55 7.34
 -6 0 20 18.59 16.54
 6 0 -20 6.23 14.67
 -6 0 -20 16.63 15.24
 6 0 20 8.08 20.71
 6 0 -21 1.06 14.56
 -6 0 21 9.63 11.28
 6 0 21 7.67 21.27
 -6 0 -21 1.6 15.44
 -6 0 21 15.93 16.2
 -6 0 22 370.48 67.34
 6 0 22 390.26 40.29
 6 0 -22 345.54 44.41
 -6 0 -22 379.82 67.9
 -6 0 23 -1.26 16.81
 -6 0 -23 0.41 16.79
 6 0 23 2.5 14.61
 6 0 -23 3.44 16.54
 6 0 -24 194.39 29.53
 6 0 24 237.38 35.58
 -6 0 24 219.73 42.04
 -6 0 -24 230.08 41.14
 -6 0 -25 21.31 20.17
 -6 0 25 12.31 20.71
 6 0 25 -3.89 18.91
 6 0 -25 2.34 22.8
 -6 0 -26 32.12 27.66
 6 0 26 53.48 25.91
 -6 0 26 55.75 27.98
 6 0 -26 10.85 31.46
 6 0 27 0.68 20.01
 -6 0 27 18.37 21.31
 6 0 -27 -7.58 24.73
 -6 0 -27 -15.01 32.45
 6 0 28 8.85 24.01
 -6 0 -28 23.47 22.51
 -6 0 28 -4.82 25.43
 -6 0 -29 2.07 24.82
 6 0 29 21.7 26.09
 -6 0 29 10.24 41.07
 6 0 30 -1.69 26.38
 -6 0 -30 16.54 25.03
 -6 0 30 12.18 28.97
 -6 0 31 8.64 28.67
 6 0 31 -4.86 26.54
 -6 0 -31 11.82 24.78
 -6 0 32 9.41 34.91
 6 0 32 19.45 32.57
 -6 0 -32 45.89 47.96
 -6 0 -33 8.87 27.68
 -6 0 33 2.66 29.28
 6 0 33 -1.67 26.4
 -6 0 -34 -10.87 27.23
 -6 0 34 29.55 41.64
 -6 0 -35 -4.41 29.15
 -6 0 35 3.65 44.18
 -6 0 36 14.2 51.43
 -6 0 -36 8.69 32.84
 -7 0 0 7.36 6.05
 7 0 0 1.96 5.56
 -7 0 0 1.71 3.78
 7 0 0 4.05 4.01
 7 0 1 -6.05 4.21
 -7 0 1 0.77 3.06
 7 0 -1 -2.5 3.44
 -7 0 -1 1.19 5.76
 -7 0 -1 8.51 5.69
 7 0 1 -1.13 4.82
 -7 0 1 13.93 6.21
 7 0 -1 2.25 8.21
 -7 0 -2 75.04 7.65
 7 0 -2 77.44 10.13
 -7 0 2 72.22 5.47
 7 0 -2 69.55 5.76
 -7 0 -2 67.27 9.45
 7 0 2 63.18 8.55
 -7 0 2 86.25 15.98
 7 0 2 76.5 8.73
 -7 0 -3 0.23 4.61
 -7 0 3 1.49 0.77
 7 0 3 1.22 5.31
 -7 0 3 0.56 3.83
 -7 0 3 1.85 6.5
 7 0 3 -5.83 4.84
 -7 0 -3 7.36 8.28
 -7 0 4 15.66 4.19
 -7 0 4 31.04 8.17
 7 0 4 11.79 6.48
 7 0 4 16.05 5.81
 -7 0 -4 7.36 6.23
 -7 0 -4 16.95 7.45
 7 0 5 4.03 5.6
 -7 0 5 0.14 0.45
 7 0 5 4.12 5
 -7 0 -5 -1.49 5.33
 -7 0 5 1.08 1.76
 -7 0 -5 -4.39 5.33
 -7 0 6 2.12 2.32
 7 0 6 10.44 5.47
 -7 0 -6 3.22 5.87
 7 0 6 3.89 10.22
 -7 0 -6 1.85 10.6
 7 0 7 11.39 9.34
 -7 0 -7 13.55 10.08
 -7 0 7 4.75 2.36
 -7 0 -7 10.53 7.79
 -7 0 -8 668.31 41.82
 7 0 8 706.57 41.25
 -7 0 8 650.64 41.5
 -7 0 -8 777.94 46.09
 -7 0 8 710.67 14.65
 -7 0 8 713.41 15.1
 -7 0 -9 4.59 6.05
 7 0 -9 -0.2 0.92
 7 0 9 3.13 5.69
 -7 0 9 -0.83 8.19
 -7 0 -9 -0.61 7.34
 -7 0 10 50.44 14.34
 -7 0 -10 44.86 12.9
 7 0 10 57.93 11.21
 -7 0 -10 46.77 9.77
 -7 0 10 45.26 2.05
 -7 0 -11 1.62 7.2
 7 0 11 -5.27 7.29
 -7 0 -11 6.12 13.95
 -7 0 11 2.81 1.69
 -7 0 11 -8.64 10.51
 -7 0 12 6.8 2.75
 -7 0 -12 6.32 10.06
 7 0 12 -1.35 8.28
 -7 0 -12 8.28 7.85
 -7 0 12 -0.81 11.34
 -7 0 13 -1.04 2.09
 -7 0 -13 -5.56 9.39
 -7 0 13 -10.58 10.62
 7 0 13 2.14 8.1
 -7 0 -13 -1.22 7.97
 7 0 -14 8.24 5.27
 -7 0 14 9.09 4.55
 -7 0 14 7.76 19.51
 7 0 14 1.6 9.72
 -7 0 -14 3.69 11.84
 -7 0 -15 1.82 11.88
 7 0 -15 0.41 6.62
 7 0 15 14.34 10.06
 -7 0 15 5 4.66
 -7 0 15 7.49 12.81
 -7 0 -16 44.47 17.35
 -7 0 16 35.74 5.42
 -7 0 16 75.91 18.68
 7 0 -16 44.41 11.16
 7 0 16 74.86 14.52
 -7 0 17 13.55 19.11
 7 0 -17 3.6 8.78
 7 0 17 -17.53 15.17
 -7 0 -17 -3.33 18.55
 -7 0 17 0.72 3.71
 -7 0 18 4.5 6.84
 7 0 -18 1.73 6.17
 -7 0 18 9.75 13.84
 -7 0 -18 -1.71 13.73
 7 0 18 1.37 11.37
 -7 0 -19 4.64 14.09
 -7 0 19 -16.27 15.1
 7 0 19 10.08 11.66
 -7 0 19 1.8 7.79
 7 0 -19 8.87 10.51
 -7 0 20 17.65 7.18
 -7 0 20 66.19 30.25
 7 0 20 35.34 15.78
 -7 0 -20 42.85 18.95
 -7 0 21 2.18 6.62
 -7 0 21 17.13 16.77
 7 0 -21 1.64 9.3
 7 0 21 13.08 20.21
 -7 0 -21 2.86 16.05
 -7 0 -22 34.48 30.47
 7 0 -22 14.63 11.73
 -7 0 22 22.17 20.55
 7 0 -23 8.08 11.3
 7 0 23 6.28 24.46
 -7 0 23 18.37 30.83
 -7 0 -23 9.36 19.74
 7 0 -24 10.87 13.77
 7 0 24 17.92 18.46
 -7 0 -24 25.05 22.75
 -7 0 24 16.83 23.29
 7 0 25 7.65 17.65
 -7 0 25 9.61 22.1
 -7 0 -25 33.94 21.63
 7 0 -25 -4.37 13.71
 -7 0 -26 37.52 26.45
 7 0 26 10.38 22.93
 -7 0 26 34.55 26.81
 -7 0 27 5.81 40.26
 -7 0 -27 14.56 23.74
 7 0 27 5.69 21.74
 -7 0 28 13.01 23.68
 7 0 28 0.68 20.5
 -7 0 -28 -37.38 33.33
 -7 0 -29 0.41 24.15
 7 0 29 12.09 24.51
 -7 0 29 8.39 27.23
 7 0 30 0.05 23.72
 -7 0 30 -5.47 25.39
 -7 0 -30 1.15 22.55
 -7 0 31 11.91 47.42
 -7 0 -31 8.26 26
 7 0 31 -0.45 26.69
 -7 0 32 4.28 32.7
 -7 0 -32 11.37 28.79
 -7 0 -33 -8.44 47.11
 -7 0 33 13.37 32.57
 -7 0 34 1.69 32.41
 -7 0 -34 5.06 29.89
 -7 0 -35 -1.49 30.81
 -7 0 35 33.74 74.45
 8 0 0 31.71 10.44
 -8 0 0 45.26 15.91
 -8 0 0 42.69 6.57
 8 0 0 63.51 9.66
 -8 0 1 -1.73 5.67
 -8 0 -1 2.32 4.48
 8 0 -1 -2.39 4.3
 -8 0 -1 7.13 7.13
 8 0 -1 1.24 6.37
 8 0 1 6.41 4.91
 8 0 1 2.9 5.92
 -8 0 1 7.79 7.4
 8 0 2 5.63 9.75
 -8 0 -2 -3.4 7.2
 -8 0 2 5.11 5.58
 -8 0 -2 8.69 5.09
 8 0 -2 2.21 7.04
 8 0 2 8.51 5.83
 -8 0 3 2.61 4.82
 -8 0 -3 4.86 5.47
 8 0 3 -0.43 6.08
 -8 0 -3 2.93 6.57
 8 0 3 3.89 5.99
 -8 0 4 4.66 2.61
 -8 0 -4 4.23 5.83
 -8 0 -4 2.66 10.31
 8 0 4 5.54 9.61
 8 0 4 -6.12 6.35
 -8 0 -5 11.7 10.8
 -8 0 -5 14.54 9.54
 -8 0 5 0.86 2.14
 8 0 5 -2.32 5.69
 8 0 6 18.05 10.42
 -8 0 -6 8.57 8.24
 -8 0 6 9.12 2.18
 -8 0 -6 20.68 11.93
 -8 0 -7 6.91 8.24
 -8 0 -7 8.15 7.74
 8 0 7 18.14 10.15
 -8 0 7 3.74 3.08
 -8 0 -8 13.17 8.12
 -8 0 8 4.41 1.58
 -8 0 -8 5.09 8.87
 -8 0 8 0.59 9.52
 8 0 8 13.5 6.5
 -8 0 8 4.66 1.33
 -8 0 -9 10.49 8.57
 8 0 9 -0.77 6.57
 -8 0 -9 -7.67 7.43
 -8 0 9 8.51 9.39
 -8 0 10 46.36 22.69
 -8 0 -10 30.63 12.47
 8 0 10 37.23 14.58
 -8 0 -10 37.77 10.87
 -8 0 -11 12.92 14.31
 -8 0 11 -1.01 10.78
 -8 0 -11 1.04 7.61
 8 0 11 -10.2 7.52
 -8 0 -12 10.98 12.31
 8 0 12 28.4 11.01
 -8 0 -12 18.46 10.2
 -8 0 12 12.29 15.03
 -8 0 -13 -8.35 10.83
 -8 0 13 3.65 11.86
 8 0 13 9.79 9.59
 -8 0 14 14.25 14.52
 8 0 14 8.6 11.12
 -8 0 -14 16.7 12.9
 -8 0 15 15.06 21.07
 8 0 15 2.66 10.35
 -8 0 15 1.71 2.68
 -8 0 -15 12.38 11.95
 -8 0 16 7.34 3.89
 8 0 16 8.39 12.06
 -8 0 -16 11.86 13.84
 -8 0 16 13.55 15.17
 -8 0 17 1.96 4.23
 -8 0 -17 10.17 20.41
 -8 0 17 -5.51 15.28
 8 0 -17 5.31 5.65
 8 0 17 4.64 11.52
 8 0 18 2.59 18.93
 -8 0 18 1.17 5.22
 -8 0 -18 5.31 14.02
 -8 0 18 24.8 22.28
 8 0 -18 4.1 7
 -8 0 19 2.09 6.01
 -8 0 19 9.63 15.15
 -8 0 -19 -3.49 14.79
 8 0 19 8.73 12.49
 8 0 -19 0.43 8.44
 -8 0 20 -0.34 4.84
 -8 0 20 11.28 16.11
 8 0 20 3.83 12.76
 8 0 -20 1.19 6.62
 -8 0 -20 8.28 16.09
 8 0 21 -3.02 12.74
 -8 0 -21 -6.37 16.32
 8 0 -21 0.05 11.37
 -8 0 21 15.37 24.96
 8 0 -22 2.72 9.32
 -8 0 22 6.84 19.2
 -8 0 -22 -9.81 27.93
 8 0 22 14.25 14.4
 8 0 23 -25.61 22.73
 8 0 -23 9.07 10.2
 -8 0 23 12.22 19.81
 -8 0 -23 4.64 30.81
 -8 0 -24 -0.18 22.01
 8 0 24 19.02 25.07
 -8 0 24 4.7 21.54
 8 0 25 -3.33 16.5
 -8 0 -25 -10.15 21.2
 -8 0 25 24.69 21.4
 -8 0 26 4.01 26.65
 -8 0 -26 18.21 26.11
 8 0 26 18.01 20.86
 -8 0 27 55.55 28.16
 8 0 27 9.21 22.51
 -8 0 -27 -9.23 27.84
 -8 0 28 23.81 40.11
 -8 0 -28 6.19 38.98
 8 0 28 -1.26 22.42
 -8 0 29 17.26 30.43
 -8 0 -29 3.74 27.37
 8 0 29 16.14 26.58
 8 0 30 19.72 23.81
 -8 0 -30 -15.87 24.6
 -8 0 30 -0.9 27.21
 -8 0 -31 -13.3 28.2
 -8 0 31 1.17 30.56
 -8 0 -32 -19 30.25
 -8 0 32 20.66 50.21
 -8 0 -33 -9.41 45.17
 -8 0 33 -0.61 33.17
 -8 0 34 -5.06 32.54
 -8 0 -34 0.81 30.11
 -8 0 -35 -11.41 29.8
 -8 0 35 10.65 31.87
 -9 0 0 0.9 4.77
 9 0 0 14.31 7.38
 9 0 0 0.09 5.58
 9 0 -1 2.09 7.81
 -9 0 1 4.5 4.64
 9 0 -1 12.92 8.17
 -9 0 -1 2.48 5.49
 9 0 1 9.12 6.12
 9 0 1 8.62 7.31
 -9 0 -2 66.64 9.07
 9 0 2 39.41 10.2
 9 0 2 76.45 10.71
 -9 0 2 57.57 6.95
 9 0 -2 57.3 11.82
 9 0 3 5.15 6.48
 -9 0 -3 -3.83 7.56
 -9 0 3 0.92 0.99
 9 0 3 3.89 6.46
 -9 0 -3 3.02 8.76
 -9 0 3 0.97 3.33
 -9 0 -4 14.76 8.17
 -9 0 -4 16.54 11.28
 9 0 4 3.24 6.93
 -9 0 4 4.68 3.31
 -9 0 5 0.11 0.52
 9 0 5 9.45 6.57
 -9 0 -5 -8.71 6.8
 -9 0 5 0.95 2.39
 -9 0 -5 1.46 7.94
 -9 0 -6 43.87 11.23
 9 0 6 51.95 9.43
 -9 0 6 33.29 3.62
 -9 0 -6 54.31 11.12
 -9 0 7 5.72 2.9
 -9 0 -7 15.82 8.89
 -9 0 -7 18.01 9.07
 -9 0 7 5.76 4.21
 9 0 7 15.91 11.3
 9 0 8 70.2 10.69
 -9 0 -8 31.31 13.62
 -9 0 -8 49.65 12.96
 -9 0 -9 2.72 8.94
 9 0 9 6.57 7.36
 -9 0 9 0.74 10.87
 -9 0 -9 4.93 9.66
 -9 0 -10 10.4 15.82
 9 0 10 3.49 8.26
 -9 0 10 7.38 11.68
 9 0 11 4.93 7.83
 -9 0 -11 -4.23 9.9
 -9 0 11 3.89 11.75
 9 0 12 12.2 14.29
 -9 0 12 6.86 14.11
 -9 0 -12 9.36 11.79
 -9 0 13 13.84 18.75
 9 0 13 4.05 8.73
 -9 0 -13 -8.33 10.98
 9 0 14 1.44 18.86
 -9 0 -14 16.18 13.12
 -9 0 14 7.31 15.84
 -9 0 -15 12.18 13.53
 -9 0 15 1.31 15.21
 9 0 15 3.06 12.51
 -9 0 -16 13.71 21.16
 9 0 16 -10.71 12.6
 -9 0 16 0.41 15.8
 -9 0 17 6.28 17.58
 -9 0 -17 14.85 23.77
 9 0 17 10.24 13.98
 -9 0 -18 -3.76 17.69
 9 0 18 18.23 15.26
 -9 0 18 16.95 19.4
 9 0 19 6.19 23.36
 -9 0 -19 7.47 17.4
 -9 0 19 8.67 28.13
 -9 0 -20 13.71 20.17
 -9 0 20 23.41 21.11
 9 0 20 6.37 27.19
 -9 0 21 13.5 21.25
 -9 0 -21 23.09 20.57
 9 0 21 5.58 17.17
 -9 0 22 -4.37 31.08
 -9 0 -22 10.49 29.82
 9 0 22 -7.04 15.51
 -9 0 23 -8.21 21.4
 -9 0 -23 -17.38 32.72
 9 0 23 0.56 15.6
 9 0 24 7.07 25.21
 -9 0 -24 -5.36 21.99
 -9 0 24 14.45 22.33
 -9 0 -25 5.51 27.75
 9 0 25 40.47 32.03
 -9 0 25 31.31 27.48
 -9 0 26 -3.78 27.08
 9 0 26 22.66 29.55
 -9 0 -26 11.5 25.36
 -9 0 -27 1.55 24.53
 9 0 27 6.28 18.03
 -9 0 27 -3.22 25.52
 -9 0 -28 -17.56 42.4
 9 0 28 20.68 20.75
 -9 0 28 -6.3 28.25
 -9 0 -29 3.38 26.72
 -9 0 29 10.44 43.73
 -9 0 30 -3.38 27.3
 -9 0 -30 0.7 25.43
 -9 0 -31 -3.65 25.77
 -9 0 31 5.85 28.49
 -9 0 -32 -15.73 29.69
 -9 0 32 7.34 32.61
 -9 0 -33 15.35 34.14
 -9 0 33 7.83 57.68
 -9 0 -34 1.71 52.55
 -9 0 34 -11.01 36.91
 -10 0 0 75.49 14.81
 10 0 0 102.54 20.19
 10 0 0 54.53 10.78
 10 0 1 5.94 8.03
 -10 0 1 7.88 7.63
 10 0 -1 6.3 8.39
 -10 0 -1 4.32 9.61
 10 0 -1 5.74 5.9
 10 0 1 -6.66 6.93
 10 0 2 6.77 7.18
 10 0 2 13.23 11.59
 -10 0 -2 -2.59 6.75
 -10 0 2 2.45 7.02
 -10 0 3 3.11 6.1
 -10 0 3 1.37 0.77
 10 0 3 8.44 6.84
 -10 0 -3 -7.74 6.73
 10 0 4 3.58 7.72
 -10 0 4 1.26 6.08
 -10 0 -4 8.06 7.7
 -10 0 5 0.27 0.54
 -10 0 5 4.41 4.82
 -10 0 -5 -3.06 7.49
 10 0 5 -1.49 6.95
 -10 0 6 4.28 2.93
 -10 0 -6 0.52 8.87
 10 0 6 0.9 8.01
 -10 0 -7 2.97 9.07
 10 0 7 13.01 11.48
 -10 0 7 1.53 3.65
 -10 0 8 7.92 3.6
 -10 0 -8 16.63 10.87
 10 0 8 22.33 8.78
 -10 0 8 10.89 2.79
 -10 0 -9 -2 14.49
 -10 0 9 4.7 10.29
 10 0 9 -1.87 7.58
 -10 0 10 6.64 12.99
 10 0 10 11.61 9
 -10 0 -10 2.3 11.19
 -10 0 11 20.19 13.53
 -10 0 -11 -6.17 11.41
 10 0 11 4.03 8.78
 10 0 12 20.55 10.38
 -10 0 -12 21.61 13.5
 -10 0 12 -8.42 16.63
 -10 0 13 2.57 15.51
 -10 0 -13 4.39 13.28
 10 0 13 11.88 10.29
 10 0 14 20.98 12.24
 -10 0 14 24.94 17.85
 -10 0 -14 19.13 15.37
 10 0 15 2.21 10.87
 -10 0 -15 2.63 12.85
 -10 0 15 1.53 14.72
 -10 0 16 14.16 17.96
 10 0 16 4.55 12.63
 -10 0 17 2.63 18.77
 -10 0 -17 9.93 16.2
 -10 0 18 22.69 22.19
 -10 0 -18 15.71 19.36
 10 0 18 12.11 18.05
 10 0 19 11.55 15.71
 -10 0 -19 -0.83 16.65
 -10 0 19 -10.22 18.75
 -10 0 20 21.7 22.33
 10 0 20 2.59 30.92
 -10 0 -20 11.3 20.12
 -10 0 21 -0.65 19.67
 -10 0 -21 -8.06 18.34
 10 0 21 9.77 16.63
 -10 0 -22 35.92 42.38
 10 0 22 52.44 25.48
 -10 0 22 30.11 29.46
 -10 0 23 34.07 37.88
 10 0 23 2.07 20.95
 -10 0 -23 13.57 24.76
 -10 0 24 25.03 25.27
 10 0 24 10.06 21.36
 -10 0 -24 -3.8 25.61
 -10 0 -25 2.43 23.34
 -10 0 25 4.73 23.29
 10 0 25 -2.16 29.42
 -10 0 -26 -20.01 25.5
 -10 0 26 9.7 24.55
 10 0 26 0.77 28.99
 -10 0 -27 5.54 29.75
 10 0 27 19.38 33.17
 -10 0 27 25.91 31.71
 -10 0 -28 24.44 50.21
 -10 0 28 16.97 33.71
 -10 0 29 12.51 33.24
 -10 0 -29 15.8 30.29
 -10 0 30 4.25 53.21
 -10 0 -30 -18.32 31.51
 -10 0 -31 -8.76 33.35
 -10 0 31 -24.26 37.59
 -10 0 32 1.46 34.3
 -10 0 -32 11.28 31.35
 -10 0 33 -4.16 33.74
 -10 0 -33 -1.15 30.18
 11 0 0 5.31 8.69
 -11 0 0 1.53 6.05
 11 0 0 -2.61 7.02
 -11 0 1 6.46 5.63
 11 0 -1 -1.04 8.71
 -11 0 -1 -7.85 6.44
 11 0 1 2.9 8.26
 -11 0 -2 37.88 10.83
 11 0 2 65.04 12.47
 -11 0 2 42.33 8.26
 -11 0 3 6.82 5.18
 11 0 3 11.48 8.55
 -11 0 -3 -1.51 8.12
 -11 0 4 4.73 4.77
 11 0 4 2.39 8.35
 -11 0 -4 12.13 8.98
 -11 0 5 0.95 0.95
 -11 0 -5 3.85 8.33
 -11 0 5 1.28 5.92
 11 0 5 7.49 8.01
 -11 0 -6 -10.35 9.7
 11 0 6 -3.58 8.51
 -11 0 6 -2.27 5.42
 -11 0 -7 10.29 14.52
 11 0 7 5.09 8.35
 -11 0 7 -1.01 4.07
 -11 0 8 1.51 1.91
 11 0 8 5.72 8.69
 -11 0 -8 3.26 15.21
 -11 0 8 1.01 2.61
 -11 0 -9 -0.63 10.92
 11 0 9 9.32 8.6
 -11 0 9 -6.03 12.54
 -11 0 10 73.8 20.62
 11 0 10 96.89 14.47
 -11 0 -10 51.81 19.22
 11 0 11 -5.6 9.12
 -11 0 11 16.02 21.54
 -11 0 -11 7.52 11.55
 11 0 12 33.58 12.63
 -11 0 -12 26.18 16.5
 -11 0 12 17.22 19.27
 11 0 13 1.19 10.8
 -11 0 13 5.22 16.59
 -11 0 -13 14.16 13.73
 -11 0 -14 71.59 20.37
 11 0 14 45.4 15.15
 -11 0 14 33.2 35.25
 11 0 15 6.86 19.99
 -11 0 15 19.58 19.09
 -11 0 -15 17.13 26.15
 11 0 16 86.72 19.31
 -11 0 16 74.81 28.45
 -11 0 -16 57.08 38.28
 11 0 17 -5.36 20.28
 -11 0 17 1.69 31.17
 -11 0 -17 17.1 17.35
 11 0 18 8.28 14.43
 -11 0 -18 12.42 18.37
 -11 0 18 0.29 20.73
 -11 0 19 16.59 21.63
 11 0 19 13.77 15.46
 -11 0 -19 -10.26 19.69
 -11 0 -20 6.71 19.38
 11 0 20 3.06 15.84
 -11 0 20 5.76 33.58
 -11 0 21 9.14 22.46
 11 0 21 22.28 29.03
 -11 0 -21 -26.51 20.26
 -11 0 -22 -8.21 39.84
 -11 0 22 26.6 26.18
 11 0 22 18.21 23.36
 -11 0 23 19.54 26.22
 11 0 23 5.63 23.29
 -11 0 -23 9.5 25.68
 11 0 24 6.77 26.33
 -11 0 24 13.57 41.32
 -11 0 -24 18.52 27.93
 -11 0 25 3.96 27.95
 -11 0 -25 14.99 28.63
 11 0 25 9.63 26.33
 -11 0 26 8.28 26.27
 -11 0 -26 -1.89 26.99
 -11 0 27 -6.95 47.47
 -11 0 -27 -11.73 30.92
 -11 0 28 16.27 32.14
 -11 0 -28 -11.93 47.24
 -11 0 29 14.43 37.43
 -11 0 -29 25.12 33.85
 -11 0 -30 6.84 31.33
 -11 0 30 7.38 34.23
 -11 0 31 15.82 62.66
 -11 0 -31 23.09 36.3
 -11 0 -32 16.86 31.31
 -11 0 32 -11.86 35.81
 -12 0 0 9.54 7.94
 12 0 0 11.03 11.21
 12 0 1 -4.32 9.32
 -12 0 -1 -1.19 7.16
 -12 0 1 6.89 9.9
 -12 0 1 -0.7 1.1
 12 0 -1 -6.82 11.66
 12 0 2 86.83 16.81
 -12 0 2 114.11 17.06
 -12 0 -2 105.04 14.85
 -12 0 -3 8.26 14.43
 12 0 3 14.07 10.42
 -12 0 3 3.04 9.3
 -12 0 4 -0.61 1.19
 -12 0 -4 5.11 13.28
 12 0 4 0.81 8.44
 -12 0 4 3.53 4.75
 -12 0 5 2.45 4.59
 12 0 5 0 8.98
 -12 0 -5 11.16 14.36
 -12 0 6 6.5 5.99
 12 0 6 -12.33 9.21
 -12 0 -6 2.81 14.52
 -12 0 7 -0.74 3.11
 12 0 7 0.95 8.67
 -12 0 -7 1.22 9.95
 -12 0 8 10.22 3.08
 12 0 8 24.51 17.53
 -12 0 8 12.47 3.76
 -12 0 -8 20.19 12.65
 -12 0 9 10.04 13.93
 12 0 9 4.39 10.31
 -12 0 -9 1.19 12.29
 -12 0 10 191.96 29.82
 -12 0 -10 171.61 26.24
 -12 0 11 -14.36 21.97
 -12 0 -11 9.81 12.92
 12 0 11 0.25 9.88
 -12 0 -12 51.72 20.32
 -12 0 12 65.2 23.38
 12 0 12 63.74 23.34
 -12 0 13 -4.14 15.69
 -12 0 -13 -0.05 13.59
 12 0 13 3.13 10.6
 -12 0 14 143.52 51.04
 12 0 14 145.17 22.28
 -12 0 -14 115.62 43.3
 12 0 15 4.43 17.89
 -12 0 15 2.72 17.96
 -12 0 -15 2.97 24.35
 12 0 16 46.03 17.78
 -12 0 16 51.22 26.94
 -12 0 -16 64.14 24.17
 -12 0 17 24.01 22.84
 -12 0 -17 5.51 20.82
 12 0 17 22.75 15.01
 -12 0 18 3.96 22.93
 12 0 18 19 23.5
 -12 0 -18 13.73 19.74
 12 0 19 -5 14.04
 -12 0 -19 9.45 18.5
 -12 0 19 12.72 21.85
 12 0 20 16.88 15.84
 -12 0 -20 3.58 21.83
 -12 0 20 -9.5 24.49
 -12 0 -21 -2.41 34.55
 12 0 21 -9.79 26.67
 -12 0 21 -14 38.87
 -12 0 22 -6.98 23.05
 12 0 22 3.17 16.34
 -12 0 -22 -3.6 22.21
 12 0 23 -1.28 19.6
 -12 0 23 20.01 26.81
 -12 0 -23 17.17 26
 -12 0 24 15.89 48.32
 -12 0 -24 14.2 30.41
 12 0 24 21.25 22.66
 -12 0 25 -8.91 26.42
 -12 0 -25 5.33 25.48
 -12 0 26 15.33 28.47
 -12 0 -26 -20.77 28
 -12 0 27 -7.79 32.61
 -12 0 -27 -13.82 32.09
 -12 0 28 39.03 66.12
 -12 0 -28 57.89 60.88
 -12 0 -29 3.96 31.98
 -12 0 29 14.34 35.85
 -12 0 -30 -23.09 30.86
 -12 0 30 36.17 33.87
 -12 0 31 35.72 40.87
 -12 0 -31 0.61 36.26
 -13 0 0 8.08 8.26
 13 0 0 4.05 12.06
 13 0 1 5.96 11.61
 -13 0 1 3.69 7.49
 -13 0 -1 4.84 8.48
 -13 0 -2 5.83 8.67
 13 0 2 0.92 16.02
 -13 0 2 4.91 6.68
 -13 0 2 1.42 1.13
 -13 0 3 7.47 6.62
 13 0 3 10.06 11.25
 -13 0 -3 -0.34 9.86
 13 0 4 17.74 11.3
 -13 0 4 4.59 6.08
 -13 0 -4 5.15 10.58
 -13 0 5 2.43 8.06
 -13 0 -5 8.35 10.56
 13 0 5 2.61 10.11
 -13 0 6 1.89 4.07
 13 0 6 -2.18 9.16
 -13 0 -6 -8.03 9.99
 13 0 7 4.77 16.16
 -13 0 -7 -1.13 11.5
 -13 0 7 3.76 6.12
 -13 0 8 11.61 5.31
 13 0 8 37.81 12.49
 -13 0 8 8.03 6.95
 -13 0 -8 30.36 14.29
 -13 0 9 0.41 2.3
 -13 0 -9 -1.22 12.4
 -13 0 9 15.69 14.04
 13 0 9 4.59 10.04
 13 0 10 3.02 12.38
 -13 0 -10 14.04 14.4
 -13 0 10 8.37 16.88
 -13 0 -11 6.93 14.16
 13 0 11 2.95 12.22
 -13 0 11 7.88 25.91
 13 0 12 20.44 20.1
 -13 0 12 4.23 19.81
 -13 0 -12 18.34 26.24
 13 0 13 15.98 12.99
 -13 0 13 15.12 21.38
 -13 0 -13 8.87 27.53
 -13 0 -14 7.27 19.42
 -13 0 14 31.04 21.94
 13 0 14 16.65 13.62
 -13 0 15 13.23 20.1
 13 0 15 7.7 20.93
 -13 0 -15 1.8 17.98
 13 0 16 14.74 14.83
 -13 0 -16 14.83 19.94
 -13 0 16 -2.32 22.1
 -13 0 17 -13.73 20.68
 -13 0 -17 21.47 18.77
 13 0 17 1.13 13.55
 -13 0 -18 8.69 22.57
 13 0 18 24.37 25.43
 -13 0 18 22.98 25.66
 -13 0 19 4.88 24.62
 -13 0 -19 7.9 22.24
 13 0 19 10.31 15.69
 -13 0 -20 40.22 34.95
 -13 0 20 -6.19 25.84
 13 0 20 4.73 15.69
 -13 0 -21 39.5 42.6
 -13 0 21 42.67 45.37
 13 0 21 1.62 28.18
 -13 0 22 0.11 28.58
 13 0 22 11.01 29.24
 -13 0 -22 30.16 27.73
 -13 0 23 7.56 28.29
 -13 0 -23 5.56 27.39
 -13 0 24 22.35 31.98
 -13 0 -24 13.03 31.98
 -13 0 25 37.56 52.31
 -13 0 -25 11.03 33.51
 -13 0 26 10.69 31.17
 -13 0 -26 4.23 31.22
 -13 0 27 12.99 34.3
 -13 0 -27 6.89 52.82
 -13 0 28 13.59 30.68
 -13 0 -28 -8.73 28.2
 -13 0 29 31.98 44.77
 -13 0 -29 31.08 39.48
 -13 0 -30 -2.77 35.04
 -13 0 30 29.82 39.97
 -14 0 0 8.8 9.88
 14 0 1 9.79 12.87
 -14 0 -1 6.35 9.57
 -14 0 1 0.45 8.53
 -14 0 -2 39.52 14.94
 -14 0 2 36.42 17.31
 14 0 2 76.84 18.21
 -14 0 -3 4.41 9.43
 -14 0 3 0.52 9.97
 -14 0 3 -0.09 0.99
 14 0 3 -4.91 17.1
 -14 0 4 -0.07 0.95
 -14 0 4 0.92 5.72
 14 0 4 0.81 10.58
 -14 0 -4 0.95 9.84
 14 0 5 -8.19 11.5
 -14 0 -5 -6.84 11.37
 -14 0 5 0.32 5.65
 -14 0 -6 10.76 13.8
 14 0 6 29.78 20.08
 -14 0 6 12.22 9.59
 -14 0 7 1.89 4.52
 14 0 7 6.91 11.21
 -14 0 -7 -1.15 12.36
 -14 0 8 8.37 5.99
 14 0 8 34.55 13.17
 -14 0 -8 27.32 15.62
 -14 0 9 1.26 2.93
 -14 0 9 -4.43 16.09
 14 0 9 2.63 11.68
 -14 0 -9 13.68 13.82
 -14 0 10 -9.34 17.24
 14 0 10 -8.15 12.78
 -14 0 -10 16.29 23.41
 -14 0 -11 9.57 26.18
 -14 0 11 7.25 30.27
 14 0 11 13.41 21.34
 14 0 12 7.49 14.54
 -14 0 12 18.79 20.37
 -14 0 -12 5.99 17.6
 14 0 13 -11.57 13.37
 -14 0 13 29.87 19.65
 -14 0 -13 9.21 16.88
 14 0 14 -1.51 23.72
 -14 0 -14 25.16 19.76
 -14 0 14 7.38 22.89
 -14 0 15 12.56 21.72
 -14 0 -15 16.99 19.38
 14 0 15 1.64 14.13
 14 0 16 17.47 13.95
 -14 0 16 -6.91 22.21
 -14 0 -16 -8.39 20.21
 14 0 17 -18.43 22.35
 -14 0 17 -4.52 22.84
 -14 0 -17 5.15 20.66
 -14 0 -18 5.96 22.46
 14 0 18 11.68 16.11
 -14 0 18 7.79 39.18
 -14 0 -19 24.26 39.93
 -14 0 19 11.5 28.36
 14 0 19 18.55 18.05
 14 0 20 -6.32 15.21
 -14 0 20 11.77 24.26
 -14 0 -20 -1.33 35.13
 -14 0 21 20.75 31.87
 -14 0 -21 20.53 29.42
 -14 0 -22 12.51 22.78
 -14 0 22 -13.89 23.97
 -14 0 -23 -4.84 30
 -14 0 23 -19.85 31.26
 -14 0 24 8.71 29.08
 -14 0 -24 0.29 28.81
 -14 0 25 19.2 44.25
 -14 0 -25 -7.92 27.01
 -14 0 26 36.42 39.21
 -14 0 -26 9.63 60.52
 -14 0 27 19.13 32.12
 -14 0 -27 -30.38 46.77
 -14 0 -28 -24.44 31.96
 -14 0 28 17.67 34.07
 -14 0 29 3.89 57.44
 -14 0 -29 12.67 35.04
 -15 0 0 -5.87 15.55
 -15 0 -1 -0.92 16.41
 -15 0 1 6.55 9.18
 15 0 2 41.48 16.86
 -15 0 2 12.94 10.8
 15 0 3 1.96 14.49
 -15 0 -3 3.2 19.15
 -15 0 3 9.32 8.42
 15 0 4 54.38 18.55
 -15 0 -4 34.82 25.32
 -15 0 4 27.08 15.35
 -15 0 5 7.67 11.23
 -15 0 -5 11.32 20.95
 15 0 5 7.67 13.95
 15 0 6 -7.54 13.08
 -15 0 6 5.51 6.17
 -15 0 7 -1.49 4.48
 15 0 7 12.4 19.04
 -15 0 -7 3.76 19.81
 15 0 8 -3.96 13.35
 -15 0 8 31.98 27.55
 -15 0 -8 20.03 23.5
 15 0 9 4.73 13.48
 -15 0 -9 5.38 15.48
 -15 0 9 9.27 19.02
 -15 0 10 -3.6 17.24
 15 0 10 17.85 18.39
 -15 0 -10 -7.67 15.01
 -15 0 -11 9.81 17.35
 -15 0 11 -6.37 31.85
 15 0 11 5.09 14.07
 -15 0 12 61.53 30.23
 15 0 12 75.82 20.71
 -15 0 -12 27.03 26.36
 15 0 13 18.03 24.96
 -15 0 -13 11.14 21
 -15 0 13 21.92 23.86
 15 0 14 10.35 16.86
 -15 0 -14 24.58 20.73
 -15 0 14 -7.92 24.51
 15 0 15 16.43 16.92
 -15 0 15 10.33 23.92
 -15 0 -15 2.54 21.52
 15 0 16 15.37 17.85
 -15 0 -16 13.1 23.16
 -15 0 16 13.84 25.21
 -15 0 -17 -4.01 22.98
 -15 0 17 10.74 26.04
 15 0 17 25.03 25.43
 -15 0 18 9.81 44.16
 15 0 18 11.91 17.92
 -15 0 -18 33.06 38.89
 -15 0 -19 -6.53 25.12
 -15 0 19 -1.24 25.59
 -15 0 20 12.92 32.99
 -15 0 -20 27.08 31.17
 -15 0 21 7.43 31.15
 -15 0 -21 12.74 29.08
 -15 0 22 7.02 27.17
 -15 0 -22 -12.29 27.05
 -15 0 23 20.62 33.67
 -15 0 -23 10.69 33.38
 -15 0 24 13.55 35
 -15 0 -24 16.7 34.55
 -15 0 -25 14.38 34.3
 -15 0 25 7.97 34.57
 -15 0 -26 -2.75 45.82
 -15 0 26 -2.54 31.78
 -15 0 -27 24.1 33.58
 -15 0 27 -11.14 35.52
 -15 0 28 37.11 35.65
 -15 0 -28 -20.93 33.42
 -16 0 0 98.49 20.08
 -16 0 -1 2.59 11.01
 -16 0 1 -4.95 9.75
 -16 0 -2 37.45 16.56
 -16 0 2 32.66 19.11
 16 0 3 4.48 15.66
 -16 0 3 8.78 14.58
 -16 0 -3 4.12 12.42
 -16 0 -4 -3.96 12.63
 16 0 4 -0.99 14.56
 -16 0 4 6.75 8.26
 -16 0 -5 4.48 13.14
 -16 0 5 -1.42 11.97
 16 0 5 -12.31 14.61
 -16 0 -6 0.86 13.64
 16 0 6 -9.72 22.01
 -16 0 -7 4.5 14.79
 16 0 7 3.47 14.67
 -16 0 8 1.19 21.02
 16 0 8 25.25 16.56
 -16 0 -8 7.76 17.42
 16 0 9 4.39 21.29
 -16 0 -9 -0.18 15.19
 -16 0 9 -0.45 18.12
 16 0 10 2.86 14.88
 -16 0 10 21.2 20.39
 -16 0 -10 2.36 17.67
 16 0 11 9.09 15.28
 -16 0 11 9.45 35.97
 -16 0 -11 7.13 18.91
 -16 0 12 36.46 26.96
 -16 0 -12 4.5 22.03
 16 0 12 28.02 26.63
 -16 0 -13 5.76 19.87
 -16 0 13 14.56 24.01
 16 0 13 2.75 15.46
 16 0 14 22.91 17.76
 -16 0 -14 1.49 23.09
 -16 0 14 -0.56 41.14
 16 0 15 9.07 16
 -16 0 15 3.15 24.04
 -16 0 -15 -2.57 21.47
 16 0 16 25 28.07
 -16 0 -16 28.07 37.97
 -16 0 16 -5.56 27.37
 -16 0 -17 12.38 36.53
 -16 0 17 2.77 23.99
 16 0 17 -7.54 16.52
 -16 0 -18 3.89 26.02
 -16 0 18 11.79 43.05
 -16 0 19 22.8 31.73
 -16 0 -19 15.71 31.22
 -16 0 20 6.53 27.82
 -16 0 -20 -9.3 26.85
 -16 0 21 31.64 36.3
 -16 0 -21 20.84 34.73
 -16 0 -22 -9.81 33.35
 -16 0 22 -19.15 51.67
 -16 0 -23 27.28 33.13
 -16 0 23 -10.74 32.52
 -16 0 -24 15.62 54.53
 -16 0 24 10.76 35.18
 -16 0 25 4.34 34.68
 -16 0 -25 18.55 50.39
 -16 0 26 43.98 48.64
 -16 0 -26 -17.98 29.78
 -17 0 0 3.33 17.87
 -17 0 -1 -7.2 18.57
 -17 0 1 -3.49 11.46
 -17 0 -2 19.36 15.53
 -17 0 2 26.94 13.1
 -17 0 -3 -5.42 12.92
 -17 0 3 6.48 9.77
 -17 0 -4 3.31 14
 17 0 4 5.18 16.61
 -17 0 -5 5.18 14.97
 17 0 5 7.45 17.19
 -17 0 -6 7.13 16.52
 17 0 6 7.04 17.33
 -17 0 -7 12.29 18.32
 -17 0 7 9.63 35.74
 17 0 7 27.41 29.19
 17 0 8 7.47 16.29
 -17 0 8 -4.79 20.95
 -17 0 -8 10.42 17.29
 -17 0 -9 11.77 17.38
 -17 0 9 -2.75 20.91
 17 0 9 1.58 16.25
 -17 0 -10 8.67 19.99
 17 0 10 10.11 17.69
 -17 0 10 21.04 36.6
 17 0 11 6.53 28.67
 -17 0 -11 6.17 21.34
 -17 0 11 30.07 25.81
 -17 0 -12 10.83 30.97
 -17 0 12 5.04 24.15
 17 0 12 -11.39 15.84
 -17 0 -13 22.64 31.94
 17 0 13 -14.43 16.41
 -17 0 13 1.69 24.91
 -17 0 14 18.61 43.62
 17 0 14 10.87 17.6
 -17 0 -14 6.46 38.37
 -17 0 -15 -20.21 23.88
 -17 0 15 4.93 25.7
 17 0 15 6.84 26.72
 -17 0 -16 13.28 22.39
 -17 0 16 -15.6 23.59
 -17 0 -17 -6.03 26.22
 -17 0 17 17.6 27.5
 -17 0 -18 4.88 26.99
 -17 0 18 3.06 44.65
 -17 0 19 12.74 30
 -17 0 -19 -0.97 28.81
 -17 0 -20 57.82 34.93
 -17 0 20 -17.94 36.51
 -17 0 21 -2.93 32.25
 -17 0 -21 18.07 31.98
 -17 0 -22 43.12 40.92
 -17 0 22 27.39 62.75
 -17 0 -23 14.72 48.91
 -17 0 23 -9.59 31.24
 -17 0 -24 12.54 56.9
 -17 0 24 22.98 38.4
 -18 0 0 34.77 16.68
 -18 0 -1 -0.72 12.22
 -18 0 1 -0.59 11.88
 -18 0 -2 -10.33 15.33
 -18 0 -3 11.82 15.96
 -18 0 -4 7.43 25.54
 -18 0 -5 19.45 29.87
 18 0 5 19.4 25.09
 18 0 6 10.62 17.78
 -18 0 -6 -12.18 26.2
 -18 0 -7 24.19 28.07
 18 0 7 -8.15 17.78
 -18 0 7 -13.44 21.9
 -18 0 -8 8.78 31.64
 18 0 8 16.36 19.72
 -18 0 8 3.38 24.35
 18 0 9 4.14 29.91
 -18 0 -9 4.95 32.97
 -18 0 9 17.04 24.17
 -18 0 -10 2.34 31.89
 -18 0 10 -7.16 38.04
 18 0 10 7.99 18.52
 -18 0 11 -16.59 25.66
 -18 0 -11 4.86 21.92
 -18 0 12 30.5 29.57
 -18 0 -12 9 25.34
 18 0 12 11.55 19.99
 18 0 13 -0.5 29.64
 -18 0 -13 13.41 24.13
 -18 0 13 9.79 28.47
 -18 0 -14 29.84 30.32
 -18 0 14 21.92 50.84
 -18 0 -15 24.42 31.15
 -18 0 15 24.24 32.77
 -18 0 -16 4.3 28.9
 -18 0 16 17.65 30.45
 -18 0 17 19.81 32.5
 -18 0 -17 8.17 30.5
 -18 0 -18 4.95 30.65
 -18 0 18 27.3 50.84
 -18 0 19 5.78 30.27
 -18 0 -19 -9.43 28.83
 -18 0 -20 16.34 33.06
 -18 0 20 6.91 35.38
 -18 0 -21 14.72 52.44
 -18 0 21 -21.02 35.67
 -18 0 22 14.27 57.95
 -18 0 -22 20.55 54.44
 -19 0 -2 9.95 16.61
 -19 0 -3 -5 15.84
 -19 0 -4 1.67 15.8
 -19 0 -5 2.18 16.5
 -19 0 6 -0.72 21.22
 -19 0 -6 -0.2 16.38
 -19 0 7 13.71 27.64
 19 0 7 25.45 26.96
 -19 0 -7 14.09 22.12
 -19 0 -8 10.58 18.73
 -19 0 8 -6.5 22.33
 19 0 8 -3.44 18.37
 19 0 9 -13.93 19.87
 -19 0 9 -8.62 39.12
 -19 0 -9 6.12 21.25
 19 0 10 -15.73 21.07
 -19 0 10 5.6 28.04
 -19 0 -10 -9.88 23.36
 19 0 11 -9.36 19.04
 -19 0 -11 10.29 22.26
 -19 0 11 -7.79 26.94
 -19 0 -12 -13.84 24.96
 -19 0 12 4.52 28.61
 -19 0 13 9.25 52.28
 -19 0 -13 20.46 28.4
 -19 0 -14 -6.55 23.61
 -19 0 14 8.78 25.95
 -19 0 15 6.14 26.42
 -19 0 -15 -5.87 24.33
 -19 0 16 8.19 32.72
 -19 0 -16 13.08 29.91
 -19 0 17 15.91 48.64
 -19 0 -17 3.53 30.2
 -19 0 -18 26.36 36.35
 -19 0 18 30.05 39.88
 -19 0 -19 23.43 47.96
 -19 0 19 -20.5 33.8
 -19 0 20 -7.81 34.34
 -19 0 -20 -9.52 48.55
 -20 0 -5 12.51 31.58
 -20 0 5 9.43 27.37
 -20 0 6 5.54 25.88
 -20 0 -6 5.47 19.36
 -20 0 7 7.43 25.97
 -20 0 -7 3.74 19.58
 -20 0 8 -4.88 25.48
 -20 0 -8 7.56 19.81
 -20 0 -9 8.87 24.01
 -20 0 9 -0.81 31.73
 20 0 9 28.27 27.23
 -20 0 -10 1.58 20.71
 -20 0 10 0.54 27.35
 -20 0 -11 -1.13 22.28
 -20 0 11 -2.57 28.45
 -20 0 -12 2.57 26.83
 -20 0 12 25.5 33.38
 -20 0 13 -28.83 45.04
 -20 0 -13 12.96 25.07
 -20 0 14 9.77 34.03
 -20 0 -14 21.18 45.89
 -20 0 15 -13.26 31.73
 -20 0 -15 8.82 43.03
 -20 0 -16 51.67 54.38
 -20 0 16 15.6 38.91
 -20 0 17 1.35 53.86
 -20 0 -17 14.34 44.97
 -21 0 4 37.11 34.25
 -21 0 5 12.18 30.14
 -21 0 6 18.37 32.25
 -21 0 7 9.97 29.98
 -21 0 -8 10.94 22.82
 -21 0 8 26.18 51.27
 -21 0 -9 14.94 21.61
 -21 0 9 -1.06 32.61
 -21 0 -10 2.09 19.27
 -21 0 10 -7.97 28.9
 -21 0 11 6.75 30.59
 -21 0 -11 2 21.34
 -21 0 -12 -1.67 21.81
 -21 0 12 -4.14 48.46
 -21 0 -13 16.52 26.04
 -21 0 13 6.28 34.23
 -22 0 2 4.97 40.92
 -22 0 3 5.69 26.69
 -22 0 4 14.88 30.34
 -22 0 5 7.65 29.12
 -22 0 6 49.2 60.43
 -22 0 7 22.39 56.58
 -22 0 8 17.8 36.01
 0 -1 -2 2 1.62
 0 -1 -2 0.07 0.38
 0 -1 2 2.09 2.81
 0 1 -2 -1.6 3.65
 0 1 2 0.32 1.49
 0 1 -2 1.78 2.61
 0 -1 2 2.9 2.9
 0 1 -3 -0.43 4.25
 0 -1 3 -0.11 3.33
 0 1 3 -0.07 1.71
 0 1 -3 2.34 3.13
 0 -1 -3 2.57 1.6
 0 -1 -3 -0.14 0.68
 0 -1 3 -1.44 3.56
 0 1 3 -0.81 0.45
 0 1 4 -0.41 0.54
 0 -1 4 7.45 4.19
 0 1 4 -0.9 0.63
 0 -1 4 -5.87 5.2
 0 1 -4 5.63 4.03
 0 1 -4 -0.83 3.87
 0 -1 -4 -0.27 0.5
 0 -1 -4 -1.67 2
 0 1 4 1.87 1.78
 0 -1 5 -3.31 4.37
 0 -1 -5 1.44 3.2
 0 -1 5 3.92 3.67
 0 1 -5 0.5 6.66
 0 1 5 1.13 2.07
 0 -1 -5 0.09 0.86
 0 1 -5 1.44 4.39
 0 -1 -6 3.13 3.29
 0 1 6 3.83 3.71
 0 -1 6 -5.02 3.51
 0 1 6 -1.28 2.39
 0 1 6 4.14 2.93
 0 1 -6 -5.33 6.48
 0 1 -6 -7.49 4.39
 0 -1 6 -1.58 4.77
 0 -1 -6 -0.63 0.68
 0 1 -7 -3.29 5.22
 0 1 7 1.49 6.19
 0 -1 7 3.08 3.92
 0 1 7 7.13 4.5
 0 -1 -7 -0.56 3.74
 0 -1 7 7.52 5.09
 0 1 -7 -4.41 4.97
 0 -1 8 0.38 6.48
 0 -1 8 3.02 8.94
 0 1 -8 -0.59 5.85
 0 1 -8 4.57 5.29
 0 -1 -8 6.82 3.89
 0 1 8 -0.97 4.34
 0 1 8 5.4 5.02
 0 1 9 -0.74 6.82
 0 -1 9 0.95 4.5
 0 1 -9 3.49 5.51
 0 1 -9 7.45 9.21
 0 -1 -9 7.31 4.05
 0 1 9 -0.5 3.67
 0 -1 9 -0.81 6.1
 0 1 -10 1.15 6.03
 0 -1 10 -6.91 6.75
 0 1 -10 7.74 6.48
 0 1 10 1.64 4.86
 0 -1 -10 8.39 4.91
 0 -1 10 1.4 5.22
 0 1 10 4.1 3.94
 0 -1 -11 -3.6 4.52
 0 1 -11 7.92 6.53
 0 -1 -11 -0.95 4.16
 0 1 11 2.14 4.84
 0 -1 11 -2.3 5.2
 0 -1 11 -3.85 6.39
 0 1 -11 -8.73 8.39
 0 1 11 9.32 6.23
 0 1 -12 8.19 6.62
 0 1 12 2.95 4.97
 0 1 12 10.13 9.25
 0 -1 12 4.7 5.85
 0 -1 -12 0.5 5.45
 0 -1 -12 0.56 5.13
 0 -1 12 8.35 7.88
 0 -1 13 5 8.3
 0 1 13 5.09 8.42
 0 -1 -13 3.04 5.69
 0 1 -13 -3.06 7.09
 0 -1 -13 5.63 5.51
 0 1 13 2.97 9.99
 0 1 14 4.34 6.08
 0 -1 -14 -0.38 5.78
 0 -1 -14 -5.13 5.56
 0 1 14 5.76 6.8
 0 1 -14 1.85 6.91
 0 -1 14 5.94 8.28
 0 -1 -15 0.2 6.59
 0 1 -15 10.24 8.06
 0 1 15 3.58 6.66
 0 -1 15 -2.9 9.32
 0 -1 -15 1.78 6.37
 0 1 -16 1.15 8.1
 0 -1 -16 -6.75 7
 0 1 16 8.28 10.96
 0 -1 16 -0.25 9.63
 0 1 17 7.63 7.74
 0 -1 17 1.35 10.02
 0 -1 -17 -5.15 7.61
 0 1 -17 2.23 8.8
 0 1 18 8.46 8.98
 0 -1 18 -0.79 11.84
 0 1 -18 -4.1 9.99
 0 -1 -18 11.57 8.76
 0 1 -19 10.51 11.75
 0 -1 19 1.13 13.64
 0 -1 -19 12.51 9.72
 0 1 19 23.92 15.78
 0 -1 -20 -13.53 9.18
 0 -1 20 1.06 19.4
 0 1 -20 14.4 10.76
 0 1 20 -3.06 10.29
 0 1 21 8.39 11.1
 0 1 -21 -10.6 12.06
 0 -1 -21 9.07 9.86
 0 -1 21 -6.19 20.64
 0 -1 22 17.31 14.2
 0 1 22 -2.14 11.95
 0 1 -22 -10.38 13.05
 0 -1 -22 10.24 10.71
 0 1 -23 7.54 14.45
 0 1 23 2.25 20.59
 0 -1 23 1.01 16.07
 0 -1 -23 9 11.88
 0 1 -24 10.74 23.88
 0 1 24 -1.31 20.55
 0 -1 -24 11.3 12.67
 0 1 -24 14.92 26.27
 0 -1 24 -1.89 17.06
 0 1 -25 -0.34 18.16
 0 1 25 19.81 21.76
 0 -1 -25 7.72 22.28
 0 -1 25 3.47 18.07
 0 -1 26 13.08 18.1
 0 1 26 0.68 22.3
 0 -1 -26 -9.97 15.1
 0 1 -26 20.77 18.46
 0 -1 -27 -3.71 13.77
 0 -1 27 -0.09 17.53
 0 1 27 26.65 32.84
 0 1 -27 -1.78 17.33
 0 -1 -28 -13.05 16.41
 0 1 28 3.62 17.92
 0 1 -28 -5.24 20.44
 0 -1 28 13.5 31.69
 0 1 -29 16.52 23.34
 0 1 29 8.67 20.95
 0 -1 -29 11.43 28.18
 0 -1 29 4.91 38.96
 0 1 30 18.77 19.99
 0 -1 -30 -8.85 17.58
 0 -1 30 -7.09 23.65
 0 1 -30 15.21 22.73
 0 1 31 8.71 23.29
 0 -1 -31 8.48 20.98
 0 1 -31 24.24 27.05
 0 -1 31 16.63 28.36
 0 1 32 13.62 32.93
 0 -1 32 5.96 25.5
 0 1 -32 15.53 38.71
 0 -1 -32 -6.23 18.75
 0 -1 -33 -13.39 35.2
 0 1 33 18.77 24.19
 0 1 -33 19.11 29.28
 0 -1 33 -1.42 30.45
 0 -1 -34 -8.37 20.21
 0 -1 34 10.92 27.12
 0 1 34 -4.03 20.98
 0 1 -34 14.81 26.87
 0 -1 -35 -13.08 26.22
 0 1 -35 -20.41 34.25
 0 1 35 -21.83 27.73
 0 -1 35 -13.53 34.07
 0 -1 36 16.07 33.53
 0 1 36 16.43 42.96
 0 -1 -36 -0.81 24.49
 0 1 -36 18.21 31.94
 0 1 -37 5.9 30.61
 0 -1 -37 14.13 36.71
 0 -1 37 -4.52 31.55
 1 -1 0 7.29 2.95
 -1 -1 0 -0.54 1.87
 1 -1 0 -0.43 3.13
 -1 1 0 6.23 2.68
 1 1 0 2.07 1.69
 -1 1 0 7.2 3.42
 1 -1 1 105.69 7.02
 1 -1 1 116.13 7
 -1 -1 -1 88.95 3.56
 -1 1 1 131.53 8.35
 1 1 -1 127.12 7.58
 -1 -1 1 88.43 5.54
 -1 1 -1 102.92 6.71
 -1 1 -1 116.61 6.8
 1 -1 -1 107.76 5.99
 1 1 1 102.74 3.29
 1 -1 -1 108.82 5.49
 -1 -1 1 88.83 6.41
 1 -1 2 61.89 6.17
 -1 1 2 71.57 4.32
 1 1 -2 55.84 6.75
 1 -1 2 68.53 6.77
 -1 -1 -2 65.99 2.93
 -1 -1 2 85.01 6.55
 -1 1 -2 71.21 10.15
 1 -1 -2 87.84 4.95
 -1 1 -2 76.23 6.55
 -1 -1 2 54.11 5.58
 1 -1 3 23.29 4.77
 -1 1 3 28.45 3.44
 1 -1 3 28.13 5.6
 1 1 -3 29.35 5.74
 1 1 -3 20.77 4.48
 -1 -1 3 21.22 7.38
 -1 1 -3 21 7.34
 -1 -1 3 30.56 4.66
 1 1 3 24.04 1.76
 1 -1 -3 28.56 3.58
 -1 1 -3 26.29 5.54
 1 -1 4 44.23 6.82
 1 1 -4 47.17 6.21
 1 1 -4 36.51 9.14
 1 -1 4 34.64 9
 -1 1 4 52.46 4.43
 -1 -1 -4 55.05 6.12
 -1 -1 4 49.04 8.87
 -1 -1 4 53.81 8.67
 -1 1 -4 43.62 7.09
 1 -1 -4 56.4 4.64
 -1 1 -4 27.14 6.41
 1 1 -5 10.58 6.12
 1 1 -5 14.54 5.15
 -1 -1 -5 27.71 7.63
 1 -1 5 15.39 6.44
 1 -1 5 13.73 7.22
 -1 1 5 13.89 3.6
 -1 -1 5 19.56 4.75
 -1 -1 5 24.62 7.72
 1 -1 -5 17.94 3.69
 -1 1 -5 23.72 9.07
 -1 1 -5 8.69 5.72
 1 1 5 14.79 2.68
 1 1 5 16.23 1.82
 1 1 -6 7.61 5.31
 1 -1 6 13.71 5.9
 -1 -1 -6 7.31 7.29
 -1 1 6 3.47 5.74
 1 -1 6 11.19 4.52
 1 1 -6 8.57 5.33
 1 -1 -6 9.14 3.29
 -1 -1 6 7.36 8.15
 1 1 6 12.22 5.06
 -1 -1 6 7.25 4.46
 -1 1 -6 4.7 5.6
 1 1 6 9.14 2.09
 -1 1 -6 9.07 5.4
 1 -1 7 2.9 4.48
 -1 1 7 1.91 3.87
 1 -1 7 15.91 5.83
 -1 1 7 6.1 3.87
 1 1 -7 10.35 7.99
 1 1 -7 1.22 5.31
 -1 -1 -7 8.57 6.95
 -1 1 -7 5.4 5.85
 -1 1 -7 12.36 8.08
 1 1 7 4.88 2.34
 1 1 7 4.14 4.75
 -1 -1 7 8.8 6.17
 1 -1 -7 4.16 3.4
 -1 -1 7 9.14 6.77
 -1 -1 7 24.96 8.42
 -1 -1 -8 0.59 4.3
 1 1 -8 6.21 5.54
 1 1 -8 4.97 5.29
 -1 -1 -8 0.09 2.61
 1 -1 8 5.9 6.12
 1 -1 8 7.45 7.2
 -1 1 8 2.57 3.96
 -1 1 8 1.26 5.78
 1 -1 -8 0.16 3.2
 1 1 8 -2.97 7.38
 -1 1 -8 -2.81 5.27
 1 1 8 1.24 2.52
 -1 1 -8 3.06 5.74
 -1 -1 8 9.12 7.94
 -1 -1 8 1.6 6.23
 1 -1 9 4.05 5.24
 1 -1 9 -4.82 6.73
 -1 1 9 5.81 4.16
 -1 -1 -9 2.3 4.75
 -1 -1 -9 1.51 4.91
 -1 1 9 -2 6.75
 1 1 -9 -1.62 6.35
 1 1 -9 -3.31 5.49
 -1 -1 9 8.15 4.48
 -1 1 -9 5.31 5.72
 -1 1 -9 8.03 9.03
 1 1 9 6.32 5.04
 -1 -1 9 10.96 9.36
 1 -1 -9 9.75 3.67
 1 1 9 8.26 5.31
 1 -1 10 7.02 8.85
 -1 1 10 -1.06 7.74
 1 -1 10 10.76 7.52
 -1 -1 -10 5.29 4.03
 -1 1 10 6.89 5.24
 1 1 -10 13.89 6.28
 -1 -1 -10 3.83 9.03
 1 1 -10 11.32 7.2
 -1 -1 10 7.04 10.6
 1 1 10 8.48 6.01
 1 1 10 6.55 4.07
 1 -1 -10 11.23 4.79
 -1 1 -10 12.31 6.37
 -1 1 -10 29.82 16.18
 -1 -1 10 12.4 4.93
 -1 1 11 7.85 5.29
 -1 -1 -11 13.21 6.5
 1 1 -11 -0.88 10.4
 -1 1 11 8.82 5.76
 -1 -1 -11 11.39 4.55
 1 -1 11 7.83 7.94
 1 -1 11 1.26 6.3
 1 1 -11 0.95 7.13
 -1 -1 11 11.46 5.76
 -1 1 -11 12.83 8.06
 1 1 11 6.39 6.62
 -1 -1 11 5.76 11.48
 1 -1 -11 7.27 7.29
 -1 1 -11 7.52 10.98
 1 1 11 8.78 6.71
 1 1 -12 8.6 7.4
 1 -1 12 12.36 13.55
 -1 -1 -12 24.98 6.86
 -1 1 12 26.06 10.2
 1 -1 12 14.4 11.01
 -1 1 12 10.71 6.14
 -1 -1 -12 12.04 5.49
 -1 -1 12 22.42 12.92
 1 1 12 9.34 11.57
 -1 -1 12 6.66 6.55
 1 1 12 12.69 5.45
 1 -1 -12 10.38 5.56
 -1 1 -12 18.59 14.27
 -1 1 -12 19.09 11.79
 1 1 -13 27.23 9.16
 1 -1 13 29.42 10.29
 -1 -1 -13 33.83 8.26
 -1 1 13 30.41 7.38
 -1 -1 -13 23 7.07
 -1 1 13 24.96 7.99
 1 -1 -13 31.19 6.64
 -1 1 -13 28.61 14.27
 -1 -1 13 21.11 7.58
 1 1 13 19.65 6.86
 -1 -1 13 41.03 15.1
 -1 -1 -14 22.35 7.58
 -1 1 14 19.99 12.6
 -1 1 14 24.15 12.6
 1 -1 14 38.35 11.01
 1 1 -14 33.67 9.81
 -1 -1 -14 8.3 13.14
 -1 -1 14 30.34 16.54
 1 1 14 28.36 11.1
 -1 1 -14 27.01 10.02
 1 -1 -14 24.69 7.25
 1 -1 15 108.17 16.29
 1 1 -15 100.54 15.03
 -1 -1 -15 90.3 12.24
 -1 -1 -15 100.94 13.03
 -1 1 15 95.74 12.76
 -1 1 15 63.04 18.84
 1 -1 -15 108.66 12.24
 -1 1 -15 72.22 14.94
 -1 -1 15 141.84 24.28
 1 1 15 118.77 18.16
 -1 -1 -16 5.83 8.24
 -1 -1 -16 6.3 7.65
 1 -1 16 17.58 10.29
 1 1 -16 8.78 9.59
 -1 1 16 10.31 8.06
 1 -1 -16 -0.11 7.38
 1 1 16 12.56 7.81
 -1 -1 16 13.68 15.48
 -1 1 -16 -1.6 14.92
 -1 -1 -17 3.74 8.57
 1 -1 17 -1.06 10.04
 -1 1 17 0.59 8.55
 1 1 -17 6.05 9.57
 -1 1 -17 -0.61 14.58
 1 1 17 5.36 7.99
 -1 -1 17 13.62 15.3
 1 -1 -17 5.65 11.39
 1 -1 18 9.77 11.01
 -1 1 18 7.36 9.63
 1 1 -18 10.02 10.85
 -1 -1 -18 6.73 9.5
 -1 -1 18 32.48 16.95
 1 1 18 -2.66 8.98
 1 -1 -18 9.34 7.97
 -1 1 -18 -13.32 16.38
 1 -1 19 8.24 12.02
 -1 -1 -19 -3.38 15.53
 1 1 -19 11.48 11.34
 -1 1 19 -9.05 15.24
 1 -1 -19 5.78 8.48
 1 1 19 6.17 20.35
 -1 -1 19 -4.07 19.78
 -1 1 -19 11.93 17.19
 -1 1 20 3.89 12.06
 1 -1 20 21.92 21.67
 1 1 -20 7.52 13.32
 -1 -1 -20 20.21 11.12
 1 -1 -20 12.2 15.26
 1 1 20 16.97 16.07
 -1 -1 20 6.41 14.76
 -1 1 -20 4.59 13.3
 1 -1 21 26.09 25.32
 1 1 -21 26.33 15.8
 -1 -1 -21 12.99 13.64
 -1 1 21 31.64 14.27
 1 -1 -21 25.52 11.73
 -1 -1 21 15.35 17.56
 -1 1 -21 27.01 16.07
 1 1 21 18.75 18.57
 -1 1 22 29.33 15.57
 1 -1 22 36.1 29.12
 1 1 -22 20.53 17.44
 -1 -1 -22 35.58 14.67
 -1 -1 22 26.42 19.29
 -1 1 -22 36.06 17.24
 1 1 22 38.62 20.8
 1 -1 -22 23.43 13.23
 -1 -1 -23 19.96 15.37
 1 -1 23 20.62 19.92
 1 1 -23 36.75 19.27
 -1 1 23 33.76 26.81
 1 -1 -23 24.6 14.13
 -1 -1 23 26.02 20.71
 -1 1 -23 57.28 18.25
 1 1 23 41.23 34.84
 1 1 -24 17.92 21.38
 -1 -1 -24 23.63 17.69
 -1 1 24 46.41 19.6
 1 -1 24 40.85 23.02
 -1 1 -24 46.63 21
 1 -1 -24 26.85 16.68
 1 1 24 45.73 18.21
 -1 -1 24 57.05 22.44
 1 -1 25 47.44 23.05
 1 1 -25 5.96 21.74
 -1 1 25 37.74 19.99
 -1 -1 -25 18.55 18.32
 1 1 25 41.95 19.15
 -1 -1 25 34.1 23.88
 1 -1 -25 32.68 17.22
 -1 1 -25 35.83 21.22
 1 -1 26 10.35 21.07
 1 1 -26 9.68 19.94
 -1 -1 -26 -2.34 24.98
 -1 1 26 5.4 28.04
 -1 -1 26 4.77 33.08
 1 1 26 14.38 17.19
 1 -1 -26 18.97 15.46
 -1 1 -26 13.26 19.29
 -1 -1 -27 15.84 16.61
 -1 1 27 3.65 24.91
 1 1 -27 -8.6 19.65
 1 -1 27 15.1 20.59
 1 -1 -27 18.7 24.04
 -1 -1 27 2.57 19.9
 -1 1 -27 4.25 18.91
 1 1 27 -5.6 16.47
 1 -1 28 -2.9 20.84
 -1 1 28 1.96 25.05
 1 1 -28 52.35 30.74
 -1 -1 -28 6.59 16.74
 -1 1 -28 -1.62 29.17
 1 -1 -28 -10.17 14.7
 -1 -1 28 10.92 20.82
 1 1 28 -1.91 26.02
 1 1 -29 17.44 37.23
 1 -1 29 -1.42 24.55
 -1 1 29 5.9 29.91
 -1 -1 -29 23.16 19.36
 -1 1 -29 10.53 24.73
 1 -1 -29 23.25 17.31
 1 1 29 0.92 19.78
 -1 -1 29 -2.66 24.33
 1 1 -30 5.33 25.32
 -1 -1 -30 18.16 32.75
 -1 1 30 23.5 48.68
 1 -1 30 24.53 39.81
 -1 -1 30 21.16 25.27
 1 1 30 12.15 20.55
 -1 1 -30 0.47 25.97
 1 -1 -30 4.37 18.03
 -1 1 31 26.69 23.23
 1 -1 31 -23.86 26.02
 -1 -1 -31 -0.95 20.19
 1 1 -31 9.97 25.84
 1 -1 -31 14.09 28.43
 -1 -1 31 14.34 25.75
 1 1 31 13.01 21
 -1 1 -31 2.5 26.38
 -1 -1 -32 5.81 21.43
 1 -1 32 8.12 27.55
 1 1 -32 6.28 26.42
 -1 1 32 11.88 24.42
 1 1 32 -2.05 22.6
 -1 1 -32 11.1 28.31
 1 -1 -32 8.87 20.28
 -1 -1 32 45.35 42.56
 -1 -1 -33 11.52 22.46
 -1 1 33 -8.82 25.34
 1 1 -33 26.56 28.18
 1 -1 33 -6.59 28.99
 1 -1 -33 22.98 21.99
 -1 -1 33 14.83 30.29
 -1 1 -33 -2.57 29.03
 1 1 33 2.25 37.34
 1 1 -34 29.53 30.79
 -1 -1 -34 24.04 37.74
 -1 1 34 13.64 43.03
 1 -1 34 -0.92 30.9
 1 -1 -34 -3.69 23.25
 -1 -1 34 0.92 33.24
 -1 1 -34 38.96 49.96
 1 1 34 22.98 26.38
 1 1 -35 40.67 46.86
 -1 -1 -35 -9.41 24.71
 -1 1 35 9.7 26.56
 1 -1 35 -1.96 31.55
 1 1 35 12.54 25.16
 -1 -1 35 23.74 32.95
 -1 1 -35 11.03 50.93
 1 -1 -35 12.42 35.45
 1 -1 36 9.34 31.4
 1 1 -36 50.41 49.99
 -1 -1 -36 3.76 25.5
 -1 1 36 -6.03 26.24
 -1 1 -36 7.85 31.89
 -1 -1 36 12.69 33.26
 -1 -1 -37 2.59 26.06
 1 -1 37 23.88 53.36
 1 1 -37 4.25 33.65
 -1 1 37 3.96 26.69
 -1 1 -37 2.57 34.05
 -1 -1 37 36.91 34.64
 -2 1 0 1141.51 47.24
 -2 -1 0 1070.59 31.13
 2 -1 0 1055.22 41.41
 2 1 0 1097.22 31.42
 -2 1 0 1106.04 38.4
 2 -1 0 1030.12 42.83
 2 1 -1 2528.83 83.39
 2 -1 1 2021.56 84.38
 -2 -1 -1 2382.88 80.21
 -2 1 1 2228.53 82.69
 2 -1 1 2380.99 95.52
 -2 1 1 2522.22 90.97
 -2 1 -1 2557.71 94.98
 2 -1 -1 2388.03 87.78
 2 1 1 2450.69 71.84
 -2 -1 1 2630.02 89.73
 -2 1 -1 2381.26 93.04
 2 -1 2 153.94 8.24
 -2 -1 -2 148.79 3.13
 -2 1 2 106.82 7.85
 -2 1 2 172.17 9.75
 2 -1 2 166.26 10.06
 2 1 -2 125.09 6.77
 -2 -1 2 162.43 12.47
 2 -1 -2 132.79 7.92
 2 1 2 151.72 3.31
 -2 1 -2 147.53 12.67
 2 -1 -2 161.82 7.02
 -2 -1 2 120.97 7.45
 -2 1 -2 179.67 13.93
 2 -1 3 63.4 5.9
 -2 -1 -3 63.24 6.93
 2 1 -3 48.41 5.27
 -2 1 3 65.16 5.92
 2 -1 3 56.42 11.77
 -2 1 -3 85.95 10.74
 -2 -1 3 44.2 6.5
 2 -1 -3 76.57 6.03
 2 -1 -3 75.24 6.23
 -2 1 -3 73.44 7.43
 -2 -1 3 42.27 6.03
 2 -1 4 79.97 6.95
 2 1 -4 97.79 8.08
 -2 1 4 98.2 9.54
 2 -1 4 85.5 9.09
 -2 -1 -4 83.12 7.85
 2 1 -4 64.19 6.68
 -2 -1 4 78.89 9.86
 -2 1 -4 87.39 8.08
 -2 1 -4 95.77 12.31
 2 -1 -4 60.54 6.71
 -2 -1 4 81.52 7.61
 2 1 -5 66.53 8.1
 -2 -1 -5 81.41 2.68
 -2 -1 -5 79.07 7.63
 -2 1 5 74.43 6.64
 2 1 -5 69.43 7.16
 2 -1 5 87.1 9.39
 2 -1 5 65.27 7.27
 -2 -1 5 70.2 7.9
 2 1 5 70.69 8.06
 2 -1 -5 84.56 7.09
 -2 1 -5 86.27 8.12
 -2 1 -5 87.1 8.82
 2 1 5 73.01 2.63
 -2 -1 5 77.9 7.56
 -2 -1 -6 124.75 9.72
 2 1 -6 119.44 9.03
 2 -1 6 125.65 16.88
 2 1 -6 108.41 9.12
 -2 -1 -6 120.97 4.79
 2 -1 6 102.88 12.31
 -2 1 6 116.09 8.64
 -2 1 -6 109.72 9.99
 -2 1 -6 115.84 10.15
 2 1 6 120.88 5.15
 2 -1 -6 122.68 5.63
 -2 -1 6 121.06 8.57
 2 1 6 112.6 9.88
 -2 -1 6 118.88 10.49
 2 -1 7 11.32 6.73
 2 -1 7 13.1 5.56
 2 1 -7 8.64 5.9
 -2 -1 -7 7.92 2
 -2 1 7 10.62 7.74
 -2 -1 -7 11.46 5.29
 2 1 -7 13.71 5.58
 -2 -1 7 8.64 6.08
 2 1 7 15.6 3.17
 -2 1 -7 10.26 6.53
 -2 -1 7 9.25 4.39
 -2 1 -7 11.1 9.3
 2 -1 -7 12.38 2.93
 2 1 7 16.05 5.9
 -2 -1 -8 54.76 5.4
 2 -1 8 49.06 12.13
 2 1 -8 50.17 11.61
 -2 1 8 58.45 7.63
 2 -1 8 62.14 9.5
 -2 1 8 58.56 11.16
 2 1 -8 35.74 12.38
 -2 -1 -8 62.07 11.91
 2 1 8 74.43 5.94
 -2 -1 8 44.23 9.3
 2 1 8 59.6 8.51
 -2 -1 8 59.78 6.71
 2 -1 -8 56.65 4.48
 -2 1 -8 55.19 8.82
 -2 1 -8 51.61 8.42
 -2 1 9 22.6 6.35
 -2 -1 -9 25.93 6.68
 2 -1 9 16.25 6.66
 2 -1 9 29.51 8.6
 2 1 -9 25.18 7.49
 2 1 -9 22.21 6.8
 -2 1 9 27.14 4.7
 -2 -1 -9 19.72 5.18
 -2 -1 9 21.9 5.29
 2 1 9 28.56 5.45
 2 1 9 24.78 7.38
 -2 1 -9 21.79 7.36
 -2 1 -9 24.58 7.79
 2 -1 -9 23.18 5.99
 -2 -1 9 22.06 8.1
 2 1 -10 17.92 6.98
 -2 1 10 23.02 4.95
 2 -1 10 15.06 7.16
 2 1 -10 21.58 7.81
 -2 1 10 25.16 6.89
 -2 -1 -10 21.27 6.01
 2 -1 10 25.48 13.91
 -2 -1 -10 33.62 7.7
 2 -1 -10 16.68 4.73
 -2 1 -10 19.94 8.12
 -2 1 -10 12.65 8.55
 -2 -1 10 28.85 8.57
 2 1 10 26.18 7.67
 2 1 10 31.64 6.05
 -2 -1 10 18.03 5.58
 2 1 -11 1.94 5.81
 2 -1 11 7.16 5.92
 -2 -1 -11 -1.96 5.29
 -2 -1 -11 -1.26 6.12
 2 -1 11 5.18 6.75
 -2 1 11 -2 5.49
 -2 1 11 -0.63 4.1
 2 -1 -11 0.07 3.6
 -2 -1 11 0.29 4.3
 2 1 11 2.97 9.57
 2 1 11 1.67 5.42
 -2 1 -11 9.07 9.81
 -2 1 -11 -2.84 6.44
 2 -1 12 0.2 8.21
 -2 1 12 -0.05 6.5
 2 1 -12 5.29 10.13
 -2 -1 -12 9.81 6.71
 -2 1 12 11.16 7.67
 -2 -1 -12 9.52 6.71
 2 -1 -12 4.82 6.5
 2 1 12 9.48 6.68
 -2 1 -12 -0.86 11.75
 -2 1 -12 -0.14 7.74
 -2 -1 12 7.72 5.6
 -2 -1 12 8.01 8.67
 2 -1 13 7.45 8.24
 -2 1 13 -2.88 6.89
 -2 1 13 1.42 5.13
 2 1 -13 4.77 6.82
 -2 -1 -13 9.81 7
 -2 -1 -13 1.8 4.73
 -2 -1 13 -1.73 5.85
 2 -1 -13 10.87 4.55
 2 1 13 5.33 7.18
 -2 1 -13 -7.99 7.85
 -2 -1 13 4.25 9.03
 -2 1 14 1.49 5.99
 -2 1 14 -5.45 11.82
 2 -1 14 5.45 8.73
 -2 -1 -14 4.1 5.2
 2 1 -14 7.04 7.45
 -2 -1 -14 25.72 11.75
 -2 -1 14 14 9.5
 2 1 14 3.17 8.26
 2 -1 -14 -0.68 5.49
 -2 1 -14 2.34 8.44
 -2 -1 14 5.72 6.01
 -2 -1 -15 47.47 10.83
 -2 -1 -15 39.99 8.51
 -2 1 15 38.28 10.62
 2 1 -15 53.99 11.05
 2 -1 15 29.53 13.41
 -2 1 15 41.28 9.16
 -2 1 -15 38.51 12.36
 2 -1 -15 50.48 8.39
 2 1 15 52.44 19.29
 -2 -1 15 57.26 13.91
 2 1 -16 11.3 9.03
 -2 1 16 0.25 7.02
 -2 -1 -16 -2.7 8.17
 2 -1 16 10.71 16.02
 -2 1 16 -0.18 8.42
 -2 -1 -16 5.9 6.66
 2 -1 -16 14.18 9.68
 2 1 16 11.66 15.28
 -2 1 -16 12.38 9.66
 -2 -1 16 -4.93 10.85
 2 1 -17 5.54 9.7
 2 -1 17 18.52 17.29
 -2 -1 -17 0.61 7.45
 -2 1 17 4.75 8.78
 -2 -1 -17 4.46 14.88
 2 -1 -17 9.72 6.77
 -2 1 -17 -0.05 10.4
 -2 -1 17 3.17 11.64
 2 1 17 2.23 7.83
 2 1 -18 35.65 18.14
 -2 -1 -18 27.71 11.91
 -2 1 18 12.38 11.05
 2 -1 18 6.53 21.25
 -2 -1 18 22.62 31.06
 -2 1 -18 22.82 13.12
 2 -1 -18 15.46 8.44
 2 1 18 21.58 10.06
 -2 -1 -19 3.58 10.87
 2 1 -19 11.32 17.22
 2 -1 19 7.09 12.09
 -2 1 19 14.56 15.73
 -2 -1 19 4.07 18.5
 2 -1 -19 12.18 7.97
 2 1 19 1.15 9.39
 -2 1 -19 -10.22 11.86
 -2 -1 -20 17.1 18.64
 -2 1 20 8.08 12.51
 2 -1 20 4.46 21.99
 2 1 -20 0.05 20.21
 2 -1 20 2.88 22.01
 2 1 20 6.28 10.87
 -2 -1 20 22.21 21.81
 2 -1 -20 12.81 9.09
 -2 1 -20 22.48 13.57
 -2 1 21 4.88 12.63
 -2 -1 -21 3.74 12.29
 2 -1 21 13.39 22.98
 2 1 -21 37.5 20.77
 2 1 21 4.48 11.77
 -2 -1 21 2.14 22.57
 -2 1 -21 24.15 13.84
 2 -1 -21 4.28 9.77
 2 -1 22 29.42 27.71
 2 1 -22 37.45 26.18
 -2 -1 -22 29.6 15.26
 2 -1 22 28.22 28.49
 -2 1 22 21.65 25.45
 -2 -1 22 42.54 27.05
 -2 1 -22 24.51 17.69
 2 -1 -22 31.46 19.78
 2 1 22 7.83 21.85
 2 -1 23 27.62 19.31
 -2 1 23 12.92 17.42
 -2 -1 -23 30.74 24.67
 2 1 -23 23.27 18.23
 2 -1 -23 29.73 13.59
 -2 1 -23 29.15 28.45
 2 1 23 17.85 23.27
 -2 -1 23 45.06 28.67
 2 -1 24 16 17.78
 -2 -1 -24 -5.13 14.88
 2 1 -24 -1.71 17.29
 -2 1 24 11.77 15.87
 -2 1 -24 21.88 17.51
 2 -1 -24 6.12 12.76
 -2 -1 24 33.11 40.65
 2 1 24 18.37 14.02
 2 1 -25 2 16.86
 2 -1 25 14.07 17.74
 -2 -1 -25 2.63 14.61
 -2 1 25 -1.46 23.97
 -2 1 -25 11.48 16.83
 2 -1 -25 15.06 19.56
 -2 -1 25 12.56 18.88
 2 1 25 -14.38 14.02
 -2 -1 -26 24.4 18.46
 2 1 -26 40.87 21.99
 2 -1 26 21.36 21.9
 -2 1 26 29.98 21.09
 2 -1 -26 19.36 15.57
 -2 -1 26 -0.52 24.64
 -2 1 -26 27.03 21.47
 2 1 26 12.99 18.32
 -2 -1 -27 52.58 31.98
 2 1 -27 30.9 24.64
 2 -1 27 39.16 25.32
 -2 1 27 40.2 23.29
 2 1 27 26.49 20.32
 -2 -1 27 33.31 27.48
 -2 1 -27 35.81 24.76
 2 -1 -27 19.18 17.58
 2 1 -28 -19.27 19.72
 -2 1 28 -0.77 18.73
 2 -1 28 25.61 20.03
 -2 -1 -28 16.47 17.65
 2 1 28 17.58 25.36
 2 -1 -28 -13.08 14.16
 -2 1 -28 12.04 19.38
 -2 -1 28 -0.77 21.02
 2 -1 29 14.79 25.72
 2 1 -29 19.51 24.06
 -2 1 29 34.71 35
 -2 -1 -29 12.56 22.17
 -2 1 -29 29.42 24.28
 2 1 29 12.65 21.76
 2 -1 -29 8.03 27.21
 -2 -1 29 12.15 25.97
 -2 -1 -30 -17.49 20.73
 -2 1 30 -5.33 30.38
 2 1 -30 19.22 22.71
 2 -1 30 22.1 23.2
 2 -1 -30 3.06 16.92
 -2 1 -30 3.04 35.49
 -2 -1 30 20.23 36.89
 2 1 30 4.55 20.3
 2 -1 31 -2.93 24.51
 -2 1 31 27.44 31.08
 2 1 -31 3.74 23.36
 -2 -1 -31 -20.39 32.77
 -2 1 -31 5.51 26.22
 -2 -1 31 11.12 25.05
 2 -1 -31 0.74 17.38
 2 1 31 4.86 20.48
 2 1 -32 13.21 41.55
 -2 -1 -32 -6.77 22.98
 -2 1 32 10.58 35.85
 2 -1 32 40.96 43.26
 -2 -1 32 6.57 28.61
 2 1 32 9.93 23.47
 -2 1 -32 28.85 29.55
 2 -1 -32 9.43 20.21
 2 -1 33 -15.26 46.57
 -2 1 33 -0.97 40.2
 2 1 -33 2.79 45.33
 -2 -1 -33 16.72 23.29
 2 -1 -33 15.53 31.31
 -2 -1 33 15.03 29.03
 -2 1 -33 -3.17 30.77
 2 1 33 -5.87 36.03
 2 1 -34 -4.3 27.64
 2 -1 34 10.6 28.61
 -2 -1 -34 -8.08 21.97
 -2 1 34 11.01 24.62
 -2 1 -34 17.33 28.97
 2 1 34 0.41 21.72
 -2 -1 34 4.41 28.04
 2 -1 -34 -3.31 18.86
 -2 1 35 -2.95 24.82
 2 1 -35 7.2 26.81
 -2 -1 -35 15.28 33.53
 2 -1 35 10.78 28.31
 -2 1 -35 -30.11 28.79
 -2 -1 35 1.67 43.42
 -2 -1 -36 -15.35 24.28
 2 -1 36 14.79 30.23
 -2 1 36 2.86 26.13
 -2 -1 36 4.86 31.49
 -2 1 -36 27.28 46.68
 2 -1 37 24.04 36.6
 -2 1 37 13.14 47.31
 -2 -1 -37 22.12 29.62
 -2 1 -37 4.21 57.62
 -2 -1 37 5.18 37.97
 -3 -1 0 5.06 3.58
 3 -1 0 -0.92 4.52
 -3 1 0 5.72 4.19
 3 1 0 2.41 2.05
 3 -1 0 4.93 4.19
 -3 1 0 -1.64 3.33
 -3 1 1 142.38 7.11
 3 -1 1 113.59 9.48
 3 -1 1 130.47 8.96
 3 1 -1 134.21 6.17
 -3 1 1 136.3 12.38
 -3 -1 -1 132.05 4.57
 -3 1 -1 141.45 7.9
 3 -1 -1 127.95 5.74
 -3 1 -1 133.76 14.36
 3 -1 -1 110.78 9.07
 -3 -1 1 120.73 5.99
 3 -1 2 277.69 15.3
 -3 -1 -2 286.24 7.72
 -3 1 2 286.76 13.26
 -3 1 2 277.01 13.12
 -3 -1 -2 268.86 13.28
 -3 -1 -2 288.69 6.55
 3 1 -2 272.44 10.13
 3 -1 2 293.64 11.03
 -3 1 -2 263.78 13.28
 -3 -1 2 262.38 10.56
 3 -1 -2 293.62 11.46
 3 -1 -2 255.74 13.5
 -3 1 -2 279.71 12.67
 -3 -1 -3 1678.67 63.06
 -3 1 3 1704.94 62.84
 3 -1 3 1584.89 63.15
 3 -1 3 1736.36 59.17
 -3 -1 -3 1643.52 42.11
 3 1 -3 1696.41 58.2
 -3 -1 3 1654.77 64.01
 3 -1 -3 1680.27 50.37
 -3 1 -3 1685.36 60.3
 3 -1 -3 1616.49 60.3
 -3 1 -3 1688.48 65.36
 -3 -1 3 1636.74 65.58
 3 -1 4 189.41 9.84
 -3 -1 -4 172.08 11.14
 3 1 -4 171.68 13.26
 3 -1 4 184.22 18.34
 -3 1 4 185.23 11.23
 -3 -1 -4 173.44 3.96
 3 -1 -4 158.36 14.94
 -3 1 -4 180.5 11.91
 3 -1 -4 174.27 8.19
 -3 -1 4 164.3 9.77
 -3 1 -4 174.45 10.49
 -3 -1 4 166.5 9.7
 3 1 4 170.37 11.48
 -3 1 5 93.78 8.39
 3 1 -5 74.52 7.18
 3 -1 5 85.34 7.65
 -3 -1 -5 87.24 2.75
 -3 -1 -5 84.92 8.82
 3 1 -5 83 7.72
 3 -1 5 91.85 14.85
 -3 -1 5 69.12 9.34
 3 1 5 73.69 2.27
 -3 1 -5 70.02 9.32
 3 1 5 84.2 9
 -3 1 -5 83.43 8.06
 -3 -1 5 87.33 8.08
 3 -1 -5 88.34 8.19
 3 1 -6 282.03 14.76
 -3 -1 -6 309.35 7.85
 -3 -1 -6 289.05 21.67
 3 -1 6 280.43 24.89
 3 -1 6 297.42 19.13
 3 1 -6 277.44 19.45
 -3 1 6 279.73 14.31
 3 -1 -6 281.78 9.66
 -3 1 -6 287.95 15.84
 -3 -1 6 271.36 14.56
 3 1 6 304.33 16.41
 3 1 6 277.39 8.03
 -3 1 -6 280.59 15.26
 -3 -1 6 309.01 14.29
 3 -1 7 41.91 7.27
 -3 -1 -7 49.33 7.72
 -3 -1 -7 49.09 3.67
 -3 1 7 41.07 7.7
 3 -1 7 49.81 8.69
 3 1 -7 36.57 8.03
 3 1 -7 48.46 7.18
 3 1 7 32.43 8.37
 3 1 7 43.19 2.99
 -3 -1 7 48.01 6.01
 -3 1 -7 52.62 8.35
 -3 -1 7 42.78 8.42
 3 -1 -7 44.61 3.15
 -3 1 -7 47.33 7.97
 -3 -1 -8 179.33 12.42
 3 -1 8 189.01 12.72
 3 -1 8 164.1 15.03
 -3 1 8 189.51 18.21
 -3 -1 -8 174.79 7.58
 3 1 -8 169.52 12.83
 3 1 -8 146.63 10.8
 -3 1 -8 177.01 13.37
 3 1 8 190.5 13.75
 -3 1 -8 176.52 13.3
 3 -1 -8 174.76 6.1
 3 1 8 166.73 6.39
 -3 -1 8 172.04 9.66
 -3 -1 8 187.55 14.11
 -3 -1 -9 39.81 8.28
 3 -1 9 42.54 9.75
 -3 -1 -9 33.4 3.31
 -3 1 9 33.71 12.29
 3 -1 9 37.47 7.99
 3 1 -9 39.81 8.98
 -3 1 9 41.46 8.37
 -3 1 -9 39.25 9.09
 -3 -1 9 39.79 5.72
 3 1 9 36.93 3.87
 3 1 9 37.59 8.73
 -3 1 -9 35.4 12.69
 3 -1 -9 33.44 3.76
 -3 -1 9 32.09 9.54
 3 -1 10 38.58 8.19
 3 1 -10 36.55 8.06
 -3 1 10 31.35 8.24
 -3 -1 -10 38.01 8.96
 3 -1 10 33.76 9.32
 -3 1 10 30.41 4.57
 3 1 -10 32 8.94
 -3 1 10 30.77 9.97
 -3 -1 -10 30.61 5.83
 3 1 10 33.15 8.94
 -3 1 -10 31.85 13.32
 3 -1 -10 33.24 3.94
 -3 -1 10 37.16 9.59
 3 1 10 33.85 6.77
 -3 1 -10 30.7 9.36
 -3 -1 10 28.72 5.81
 3 -1 11 254.95 20.84
 -3 -1 -11 301.59 11.48
 -3 -1 -11 313.81 20.91
 3 1 -11 297.56 17.8
 -3 1 11 304.38 19.65
 -3 1 11 323.37 17.71
 -3 1 -11 286.6 20.14
 3 1 11 299.76 12.99
 3 -1 -11 296.75 11.28
 -3 -1 11 317.7 14.85
 -3 -1 11 288.4 30.2
 -3 1 -11 320.63 21.49
 -3 1 12 125.27 8.64
 3 -1 12 127.45 22.46
 3 1 -12 119.06 12.24
 -3 -1 -12 113.05 7.58
 -3 -1 -12 125.18 13.19
 -3 1 12 97 19.83
 3 -1 -12 118.59 10.51
 -3 -1 12 122.21 9.39
 -3 1 -12 121.15 14.16
 -3 -1 12 114.56 15.91
 3 1 12 108.03 9
 -3 1 13 5.49 5.42
 3 -1 13 12 9.88
 3 1 -13 5.76 11.14
 -3 1 13 4.77 8.12
 -3 -1 -13 11.16 4.77
 -3 -1 -13 24.96 8.3
 3 1 13 11.66 8.62
 -3 -1 13 8.53 6.26
 -3 1 -13 4.64 8.82
 -3 -1 13 5.81 9.61
 3 -1 -13 10.56 4.84
 3 1 -14 49.65 10.33
 -3 1 14 45.28 10.98
 -3 -1 -14 44.9 10.98
 -3 -1 -14 47.4 11.43
 3 -1 14 49.29 12.99
 -3 1 14 38.22 10.85
 -3 -1 14 41.37 8.33
 3 -1 -14 48.93 10.2
 -3 -1 14 39.25 13.41
 3 1 14 50.32 11.7
 -3 1 -14 31.69 12.04
 3 1 -15 82.55 13.32
 -3 -1 -15 80.17 13.82
 3 -1 15 77.54 16.65
 -3 1 15 86.02 14.16
 -3 -1 -15 84.17 9.81
 -3 1 15 81.65 9.66
 3 1 15 90.63 15.08
 -3 -1 15 80.12 16.92
 -3 1 -15 88.47 21.83
 3 -1 -15 83.36 8.76
 -3 -1 15 83.81 10.33
 -3 1 16 0.56 6.32
 -3 -1 -16 3.98 8.82
 3 1 -16 2.25 8.76
 -3 -1 -16 5.29 6.53
 3 -1 16 13.93 10.71
 -3 1 16 3.04 13.91
 3 1 16 8.87 6.71
 -3 1 -16 4.07 15.69
 3 -1 -16 1.55 5.72
 -3 -1 16 36.64 17.22
 -3 -1 -17 6.8 6.77
 -3 1 17 0.27 8.96
 -3 -1 -17 -10.42 13.35
 3 1 -17 -7.07 9.12
 -3 1 17 4.75 6.77
 3 -1 17 10.85 10.94
 -3 1 -17 2.86 15.87
 3 1 17 -5.22 10.96
 -3 -1 17 7.02 18.32
 3 -1 -17 -0.16 9
 -3 1 18 5.42 7.79
 -3 1 18 9.05 10.26
 3 -1 18 17.8 11.97
 -3 -1 -18 -5.9 10.78
 3 1 -18 2.66 15.87
 -3 1 -18 2.7 11.82
 -3 -1 18 1.76 13.03
 3 -1 -18 1.42 6.77
 3 1 18 3.49 12.38
 3 1 -19 24.44 17.65
 -3 -1 -19 9.57 12.2
 3 -1 19 15.84 21.81
 -3 1 19 5.58 11.91
 3 -1 -19 8.21 7.9
 -3 -1 19 10.83 15.48
 3 1 19 17.01 14.85
 -3 1 -19 18.28 13.41
 3 1 -20 -11.23 16.52
 3 -1 20 8.67 20.37
 -3 -1 -20 -2.93 11.61
 -3 1 20 0.14 10.85
 3 1 20 0.88 15.01
 3 -1 -20 7.13 11.95
 -3 -1 20 18.37 14.11
 -3 1 -20 -2.07 12.31
 -3 1 21 -2.23 21.47
 -3 -1 -21 13.21 14.25
 3 1 -21 17.96 14
 3 -1 21 31.15 25.97
 3 1 21 28.94 19.42
 -3 1 -21 14.45 15.71
 3 -1 -21 18.84 10.4
 -3 -1 21 11.23 17.13
 -3 1 22 7.58 12.92
 3 1 -22 -0.95 12.69
 -3 -1 -22 -13.01 12.54
 3 -1 22 13.3 22.8
 -3 -1 22 7.22 24.04
 3 -1 -22 -0.97 9.16
 -3 1 -22 6.77 13.95
 3 1 22 7.45 11.1
 -3 1 23 57.1 19.72
 -3 -1 -23 28.9 19.02
 3 1 -23 72 30.02
 3 -1 23 37.47 34.93
 -3 -1 23 77.56 33.69
 3 1 23 51.2 17.35
 3 -1 -23 33.11 22.64
 -3 1 -23 30.61 21.58
 -3 1 24 31.94 24.85
 -3 -1 -24 3.65 24.31
 3 1 -24 -3.04 25.63
 3 -1 24 24.67 29.48
 3 1 24 -0.52 14.79
 -3 -1 24 18.59 28
 3 -1 -24 11.95 11.41
 -3 1 -24 7 17.51
 -3 -1 -25 2.45 14.47
 3 1 -25 8.87 24.76
 3 -1 25 11.86 17.8
 -3 1 25 14.2 16.02
 -3 1 -25 18.48 26.06
 -3 -1 25 10.06 25.14
 3 1 25 -4.68 13.91
 3 -1 -25 -9.45 10.71
 3 -1 26 -3.2 17.49
 3 1 -26 -1.49 26.31
 -3 1 26 20.71 15.19
 -3 -1 -26 1.78 14.56
 3 1 26 -9.3 13.91
 -3 1 -26 -18.95 26.27
 3 -1 -26 1.82 10.8
 -3 -1 26 -14.65 26.13
 -3 -1 -27 17.42 19.09
 3 1 -27 26.94 35.61
 -3 1 27 6.68 20.3
 3 -1 27 22.73 23.11
 3 -1 -27 21.25 23.5
 3 1 27 10.49 18.5
 -3 -1 27 9.03 53.25
 -3 1 -27 5.56 22.64
 -3 -1 -28 37 34.41
 -3 1 28 37.05 36.21
 3 -1 28 25.97 25.97
 3 1 -28 34.53 25.32
 3 -1 -28 6.89 16.88
 -3 1 -28 39.34 24.73
 3 1 28 19.04 32.21
 -3 -1 28 -10.4 27.1
 3 1 28 15.53 32.07
 -3 1 29 15.57 21.99
 3 -1 29 4.75 24.24
 -3 -1 -29 -3.87 20.8
 3 1 -29 3.8 23.2
 -3 -1 29 11.01 25.41
 3 -1 -29 9.09 15.71
 3 1 29 9.75 19.15
 -3 1 -29 -4.59 23.16
 3 1 -30 19.36 25.84
 -3 -1 -30 27.1 22.82
 3 -1 30 3.71 26.83
 -3 1 30 21.13 23.81
 -3 1 -30 25.05 24.71
 3 1 30 -6.19 20.66
 -3 -1 30 17.04 27.32
 3 -1 -30 -4.34 17.67
 -3 -1 -31 10.8 22.44
 3 -1 31 -20.39 26.51
 3 1 -31 7.2 25.36
 -3 1 31 13.82 36.28
 3 1 31 5 20.44
 -3 1 -31 1.53 24.8
 -3 -1 31 6.46 27.12
 3 -1 -31 18.97 26.69
 3 1 -32 12.54 26.38
 -3 1 32 24.15 32.99
 3 -1 32 -19.29 27.37
 -3 -1 -32 -1.89 33.8
 -3 -1 32 16.81 27.84
 3 -1 -32 5.83 17.78
 3 1 32 -11.97 21.54
 -3 1 -32 22.84 39.43
 -3 -1 -33 -18.19 24.49
 3 -1 33 1.19 30.16
 -3 1 33 -7.04 38.44
 3 1 -33 4.01 28.76
 3 1 33 -8.3 22.66
 -3 1 -33 -22.64 31.1
 -3 -1 33 24.55 46.54
 -3 -1 -34 27.32 27.95
 3 -1 34 4.75 53.93
 3 1 -34 9.95 32.45
 -3 1 34 30.43 44.02
 -3 -1 34 32.79 35.18
 -3 1 -34 -4.88 36.64
 -3 -1 -35 -3.22 28.18
 -3 1 35 58.38 65.94
 3 -1 35 -0.99 50.5
 -3 -1 35 26.42 34.48
 -3 1 -35 19.04 35.99
 -3 -1 -36 -0.88 44
 -3 1 36 26.99 31.87
 3 -1 36 12.83 32.97
 -3 -1 36 -0.81 35.52
 -3 1 -36 20.77 36.62
 -3 -1 -37 18.34 24.78
 3 -1 37 0.32 28.13
 -3 1 37 -15.42 26.85
 -3 -1 37 2.95 30.47
 -3 1 -37 -17.58 30.63
 -4 1 0 406.27 19.15
 4 -1 0 400.89 18.55
 4 -1 0 331.12 12.87
 -4 -1 0 347.97 13.46
 -4 1 0 367.08 17.69
 -4 -1 -1 288.83 10.4
 -4 -1 -1 283.38 13.77
 -4 1 1 287.43 11.37
 -4 -1 -1 270.71 9.86
 -4 1 1 296.23 15.37
 4 -1 1 282.7 15.01
 4 -1 1 267.78 15.3
 -4 1 -1 338.84 23.11
 4 -1 -1 288.15 14.94
 -4 1 -1 238.16 15.1
 -4 -1 1 249.46 11.55
 4 -1 -1 258.26 9.34
 -4 1 -1 261.26 17.15
 4 -1 2 116.09 8.03
 -4 -1 -2 125.92 9.45
 4 1 -2 124.24 11.21
 -4 1 2 141.61 10.92
 -4 -1 -2 115.19 4.84
 4 -1 2 142.22 15.8
 -4 1 2 138.62 7
 -4 -1 2 119.55 11.48
 -4 1 -2 133.46 10.29
 4 -1 -2 135.74 6.82
 4 -1 -2 138.64 10.67
 -4 1 -2 116.92 8.6
 -4 -1 -3 4.01 2.61
 4 -1 3 7.36 5.9
 -4 1 3 5.51 3.87
 4 -1 3 2.48 6.19
 -4 -1 -3 4.61 4.77
 -4 1 3 6.03 5.38
 4 1 -3 -3.62 3.98
 4 -1 -3 9.32 7.88
 4 -1 -3 1.58 1.8
 -4 -1 3 5.67 4.41
 -4 1 -3 0.29 4.23
 -4 1 -3 7.97 5.29
 -4 -1 -4 20.3 9.66
 4 -1 4 19.27 7.16
 -4 1 4 20.14 6.84
 4 1 -4 10.15 5.58
 -4 -1 -4 25.91 3.33
 4 -1 4 19.29 5.04
 4 1 4 21.72 1.8
 -4 -1 4 20.21 4.95
 -4 -1 4 27.14 6.12
 4 -1 -4 28.09 9.54
 4 -1 -4 20.77 2.23
 -4 1 -4 10.92 6.86
 4 1 4 20.08 6.64
 -4 1 -4 17.38 5.67
 -4 -1 -5 87.64 3.47
 4 1 -5 82.42 9.16
 -4 -1 -5 100.38 9.79
 4 -1 5 76.27 8.03
 4 -1 5 103.55 10.62
 -4 1 5 103.78 10.06
 4 -1 -5 98.4 4.77
 4 1 5 83.16 3.08
 -4 -1 5 110.55 7.79
 4 -1 -5 91.15 14.36
 -4 1 -5 93.33 15.26
 4 1 5 79.58 14.54
 -4 1 -5 91.2 13.41
 -4 -1 5 69.32 9.09
 4 1 -6 69.95 9.23
 4 -1 6 84.47 10.8
 -4 -1 -6 79.18 3.44
 -4 -1 -6 75.04 8.96
 -4 1 6 71.5 9.59
 -4 -1 6 65.47 6.44
 4 1 6 77.17 4.14
 4 1 6 74.74 9.9
 4 -1 -6 70.13 3.35
 4 -1 -6 67.83 2.63
 -4 -1 6 87.26 9.09
 -4 1 -6 65.02 9.05
 -4 1 -6 94.53 10.13
 4 -1 -6 42.76 10.78
 4 1 -7 8.44 7
 4 1 -7 11.14 5.36
 -4 -1 -7 16.25 3.56
 4 -1 7 21.74 7.88
 4 -1 7 16.23 6.14
 -4 -1 -7 0.54 10.8
 -4 1 7 12.24 6.89
 -4 -1 7 23.56 10.56
 4 -1 -7 15.53 2.59
 -4 1 -7 15.62 7.18
 -4 1 -7 15.75 6.66
 4 1 7 14.38 3.6
 -4 -1 7 14.9 5.36
 4 1 7 34.19 12
 -4 -1 -8 50.95 9.36
 -4 1 8 44.83 9.54
 -4 -1 -8 72.52 7.58
 4 1 -8 55.66 11.1
 4 1 -8 41.57 13.48
 4 -1 8 39.48 10.49
 4 -1 8 34.5 8.76
 -4 1 -8 46.36 9.81
 4 1 8 47.04 9.72
 -4 1 -8 45.67 8.85
 -4 -1 8 37.9 6.05
 4 -1 -8 51.31 3.94
 4 1 8 52.49 4.03
 -4 -1 8 35.09 9.45
 -4 1 9 120.18 13.32
 -4 -1 -9 116.2 6.01
 -4 -1 -9 108.1 18.43
 4 1 -9 94.66 12.6
 4 -1 9 106.07 13.75
 4 1 -9 128.94 16.18
 -4 1 -9 100.56 12.69
 -4 -1 9 109.7 13.32
 -4 1 -9 112.74 20.37
 4 1 9 124.51 9.23
 -4 -1 9 118.45 8.55
 4 -1 -9 114.85 4.66
 4 -1 10 132.34 15.8
 4 1 -10 158.29 12.81
 -4 1 10 147.58 14.63
 -4 -1 -10 146.7 7.45
 -4 -1 -10 149.85 15.6
 -4 1 -10 126.28 14.02
 -4 1 -10 130.4 15.44
 -4 -1 10 123.63 15.19
 -4 -1 10 148.48 13.82
 4 -1 -10 145.68 6.01
 4 1 10 149.53 8.48
 -4 -1 -11 29.8 9.77
 4 1 -11 19.36 7.07
 4 -1 11 29.51 15.57
 -4 1 11 27.98 9.18
 -4 -1 -11 22.48 6.55
 4 -1 -11 23.7 3.62
 -4 -1 11 13.62 16.36
 -4 1 -11 20.19 10.17
 4 1 11 16.05 6.93
 -4 -1 11 12.85 8.35
 -4 1 -11 22.62 9.43
 -4 -1 -12 70.99 12.13
 -4 -1 -12 61.8 6.66
 -4 1 12 81.36 12.74
 4 -1 12 73.84 14.61
 4 -1 -12 76.63 7.74
 4 1 12 48.32 6.71
 -4 -1 12 62.5 11.21
 -4 1 -12 61.58 12.65
 -4 -1 12 74.25 13.64
 -4 1 13 140.98 24.44
 -4 1 13 109.85 8.94
 -4 -1 -13 128.4 9.18
 4 1 -13 140.37 14.83
 -4 -1 -13 119.35 16.29
 4 -1 13 147.91 17.96
 -4 -1 13 120.16 18.5
 4 1 13 125.27 10.26
 -4 -1 13 123.74 10.2
 4 -1 -13 127.27 8.01
 -4 1 -13 122.86 16.18
 -4 1 14 41.39 9.75
 4 1 -14 60.61 16.99
 -4 -1 -14 38.06 6.89
 -4 1 14 41.28 12.29
 -4 -1 -14 48.1 12.15
 4 -1 14 44.23 19.81
 -4 1 -14 42.72 13.14
 4 1 14 48.32 8.08
 -4 -1 14 51.95 13.77
 4 -1 -14 39.43 8.76
 -4 -1 14 41.39 8.12
 -4 1 15 37.63 16.92
 -4 -1 -15 14.79 11.39
 -4 1 15 23.61 6.37
 4 1 -15 23.54 9.43
 -4 -1 -15 26.87 10.26
 4 -1 15 33.22 12.27
 -4 -1 15 19.2 11.39
 4 1 15 32 12
 -4 1 -15 37.47 12.31
 4 -1 -15 24.1 5.69
 -4 -1 15 32.88 20.98
 -4 -1 -16 59.08 14.38
 4 -1 16 59.64 15.78
 -4 1 16 68.8 15.3
 -4 -1 -16 50.59 9.3
 4 1 -16 65.79 12.49
 -4 1 16 54.29 8.91
 4 -1 -16 58.76 7.92
 -4 1 -16 62.03 15.91
 4 1 16 53.48 14.9
 -4 -1 16 60.2 18.1
 -4 -1 16 55.46 9.61
 4 -1 17 32.3 13.82
 -4 -1 -17 28.31 12.56
 -4 1 17 21.18 13.3
 4 1 -17 30.41 11.41
 -4 -1 -17 26.85 8.51
 -4 1 17 22.93 8.21
 -4 -1 17 33.22 15.33
 4 -1 -17 31.1 11.37
 4 1 17 23.65 9.32
 -4 1 -17 19.74 13.46
 -4 -1 -18 14.97 11.43
 4 -1 18 12.36 11.93
 -4 1 18 0.68 11.12
 -4 -1 -18 -6.59 12.09
 4 1 -18 13.84 15.48
 -4 1 18 1.91 10.83
 4 -1 -18 3.24 6.57
 4 1 18 10.49 8.37
 -4 1 -18 -5.38 11.97
 -4 -1 18 4.41 13.64
 4 -1 19 24.04 13.91
 -4 1 19 5.02 13.01
 -4 -1 -19 21.29 13.62
 4 1 -19 16.27 18.23
 -4 1 19 -1.28 13.59
 -4 1 -19 38.1 21
 -4 -1 19 11.48 15.24
 4 -1 -19 16.09 7.99
 4 1 19 5.38 10.24
 -4 1 20 11.16 19.33
 -4 -1 -20 11.48 13.55
 4 -1 20 -4.91 21.67
 4 1 -20 10.26 18.59
 4 -1 -20 2.93 12.92
 4 1 20 7.31 10.51
 -4 1 -20 31.35 21.88
 4 -1 21 5.92 21.07
 4 1 -21 4.21 11.82
 -4 -1 -21 8.33 19.42
 -4 1 21 9.41 12.4
 4 -1 -21 -7.13 7.76
 -4 -1 21 4.93 15.57
 -4 1 -21 5.69 14.09
 4 1 21 5.92 10.26
 4 -1 22 7.25 22.19
 -4 -1 -22 19.85 12.96
 -4 1 22 7.92 12.56
 4 1 -22 2.99 12.65
 4 -1 -22 -9.95 8.1
 4 1 22 -5.27 10.71
 -4 1 -22 10.47 14.74
 -4 -1 22 3.17 16.25
 -4 1 23 25.18 26.22
 -4 -1 -23 4.84 15.96
 4 -1 23 20.53 28.81
 4 1 -23 19 16.14
 4 1 23 15.44 13.95
 -4 1 -23 5.87 17.78
 4 -1 -23 10.04 10.38
 -4 -1 23 6.01 20.26
 4 1 -24 10.67 16.9
 -4 -1 -24 0.68 16.05
 -4 1 24 10.06 17.15
 4 -1 24 28.67 28.94
 -4 1 -24 -21 18.68
 4 1 24 3.58 14.45
 -4 -1 24 19.45 20.23
 4 -1 -24 26.38 16.68
 -4 1 25 18.12 18.41
 -4 -1 -25 0.14 17.51
 4 1 -25 5.76 18.75
 4 -1 25 17.24 30.34
 -4 1 -25 25.16 20.3
 4 1 25 18.12 15.6
 -4 -1 25 13.48 33.51
 4 -1 -25 1.78 12.38
 -4 -1 -26 14.58 17.94
 4 -1 26 4.79 31.26
 4 1 -26 7.45 19.31
 -4 1 26 -6.26 29.35
 4 -1 -26 2.12 12.9
 4 1 26 20.89 25.05
 -4 -1 26 22.1 32.09
 -4 1 -26 9 20.37
 4 1 -27 2 20.66
 4 -1 27 -7.63 32.86
 -4 -1 -27 14.94 18.66
 -4 1 27 7.97 19.65
 4 -1 -27 7.4 13.57
 4 1 27 6.98 28.22
 -4 -1 27 15.28 32.5
 -4 1 -27 -5.02 33.6
 4 1 -28 -3.85 36.01
 -4 -1 -28 18.3 20.48
 -4 1 28 4.3 21.88
 4 -1 28 26.18 23.68
 -4 1 -28 19.69 37.16
 4 1 28 -8.64 31.26
 -4 -1 28 13.21 35.81
 4 -1 -28 9 23.47
 -4 -1 -29 12.65 22.87
 4 -1 29 24.67 24.82
 -4 1 29 1.04 23.16
 4 1 -29 20.12 37.81
 -4 1 -29 12 25.16
 4 -1 -29 16.29 16.11
 4 1 29 4.07 21.43
 -4 -1 29 1.06 39
 4 1 -30 15.78 41.21
 -4 1 30 15.39 24.69
 4 -1 30 24.89 25.75
 -4 -1 -30 10.4 23.83
 4 1 30 3.33 21.58
 -4 -1 30 50.37 60.86
 4 -1 -30 -2.39 16.36
 -4 1 -30 14.09 26.02
 -4 -1 -31 -7.47 24.96
 -4 1 31 21.45 26.78
 4 -1 31 14.9 27.44
 4 1 -31 22.8 27.62
 4 1 31 12.9 23.79
 -4 1 -31 33.11 27.44
 -4 -1 31 -29.08 30.2
 4 -1 32 16.7 27.84
 -4 -1 -32 22.8 25.91
 4 1 -32 4.28 28.07
 -4 1 32 11.05 27.05
 -4 -1 32 25.23 31.06
 4 1 32 0.81 23.56
 -4 1 -32 -15.37 28.09
 4 -1 33 35.36 35.54
 -4 1 33 13.03 50.82
 -4 -1 -33 38.64 46.72
 -4 -1 33 15.91 38.26
 -4 1 -33 36.33 34.14
 -4 -1 -34 11.48 24.91
 4 -1 34 4.91 29.64
 -4 1 34 -9.97 40.08
 -4 -1 34 -8.71 33.26
 -4 1 -34 14.74 51.56
 -4 1 -34 33.67 46.86
 4 -1 35 -7.2 28.29
 -4 1 35 16.72 39.12
 -4 -1 -35 -11.39 25.45
 -4 -1 35 11.05 49.81
 -4 1 -35 25.32 32.07
 4 -1 36 11.3 30.68
 -4 -1 -36 16.25 27.71
 -4 1 36 -7.22 42.94
 -4 -1 36 -3.94 33.98
 -4 1 -36 5.36 34.91
 -5 -1 0 -0.97 2.9
 -5 -1 0 1.67 3.89
 5 -1 0 2.95 4.77
 -5 -1 0 2.45 3.15
 5 -1 0 1.78 2.57
 -5 1 0 0.11 2.81
 -5 1 0 4.91 5.13
 -5 -1 0 -0.43 0.72
 5 -1 1 15.08 6.26
 -5 -1 -1 10.13 5
 -5 -1 -1 4.07 5.06
 5 -1 1 12.11 3.78
 -5 1 1 16.07 5.27
 -5 1 1 9.95 6.62
 5 -1 -1 23.05 6.77
 -5 -1 1 6.05 6.95
 -5 1 -1 -0.9 6.46
 -5 1 -1 14.27 6.44
 -5 1 2 65.04 5.18
 5 -1 2 85.03 9.25
 5 -1 2 56.99 9.45
 -5 -1 -2 65.09 7.7
 -5 -1 -2 73.1 7.83
 -5 1 2 89.67 10.35
 5 -1 -2 56.92 5.96
 -5 1 -2 94.1 10.15
 -5 -1 2 52.85 7.76
 5 -1 -2 82.82 9.25
 -5 1 -2 57.3 7.07
 -5 1 3 36.42 3.8
 -5 -1 -3 39.86 10.8
 5 -1 3 30.92 5.76
 -5 1 3 32.34 8.26
 5 -1 3 33.78 8.01
 -5 -1 -3 22.84 5.85
 -5 1 -3 32.16 9.12
 5 -1 -3 29.3 2.88
 -5 1 -3 37.63 7.83
 -5 -1 3 28.99 6.71
 5 -1 -3 36.62 7.61
 -5 1 4 12.24 2.57
 5 -1 4 14.94 5.13
 5 -1 4 20.08 6.86
 -5 1 4 11.5 7.74
 -5 -1 -4 14.65 2.68
 -5 -1 -4 2.03 6.5
 5 -1 -4 10.02 2.36
 5 1 4 13.62 2.52
 -5 -1 4 9.21 6.05
 5 1 4 -0.74 6.71
 -5 1 -4 13.71 6.82
 5 -1 -4 18.91 6.59
 -5 1 -4 3.67 5.31
 -5 1 5 7 10.44
 -5 -1 -5 0.92 2.36
 5 -1 5 16.81 7.11
 5 -1 5 -1.1 5.02
 -5 -1 -5 8.44 5.74
 5 -1 -5 1.69 9.77
 -5 1 -5 9.54 10.08
 5 1 5 4.14 6.32
 -5 -1 5 -1.06 6.1
 -5 -1 5 3.44 4.23
 5 -1 -5 3.42 1.49
 5 1 5 9.07 2.12
 -5 1 -5 -1.64 5.22
 5 -1 6 11.52 6.46
 -5 -1 -6 0.86 3.65
 -5 1 6 0.72 0.92
 -5 1 6 -1.58 6.75
 5 1 -6 -4.39 5.54
 5 -1 6 -0.18 5.11
 -5 -1 -6 6.21 5.56
 5 1 6 4.82 6.35
 -5 -1 6 1.15 6.08
 -5 -1 6 5 4.3
 5 -1 -6 1.06 0.68
 5 1 6 1.62 1.89
 5 -1 -6 7.02 6.19
 -5 1 -6 1.37 5.27
 -5 -1 -7 1.44 2.41
 5 1 -7 -0.99 6.19
 5 -1 7 6.89 6.89
 -5 -1 -7 -2.72 6.26
 -5 1 7 7.63 7
 5 -1 7 3.06 5.87
 -5 1 -7 6.08 10.76
 5 1 7 1.58 2.12
 5 -1 -7 1.76 1.22
 -5 -1 7 5.2 10.44
 -5 -1 7 4.93 3.87
 5 1 7 6.01 10.67
 -5 1 -7 -1.4 5.9
 -5 -1 -8 12.67 3.17
 -5 -1 -8 9.25 7.88
 5 -1 8 14.34 12.69
 5 1 8 15.1 2.88
 -5 1 -8 18.28 13.28
 -5 -1 8 9.57 8.17
 5 -1 -8 14 2.39
 -5 -1 8 8.37 7.56
 -5 1 -8 13.8 7.56
 5 -1 9 2.61 8.17
 -5 -1 -9 2.21 12.15
 -5 -1 -9 4.07 3.04
 5 1 -9 1.58 5
 -5 -1 9 7.04 7.74
 -5 1 -9 3.06 7.13
 -5 -1 9 -1.46 4.52
 5 -1 -9 5.51 1.78
 -5 1 -9 1.15 7.22
 5 1 9 4.68 3.24
 -5 -1 -10 4.14 7.56
 5 -1 10 0.47 7.83
 5 1 -10 0.45 5.15
 -5 -1 -10 -1.26 4.95
 -5 -1 10 4.23 6.28
 5 1 10 5.24 5.27
 -5 1 -10 5.58 7.13
 -5 -1 10 4.97 11.64
 5 -1 -10 -1.67 2.23
 -5 1 -10 3.94 7.61
 -5 1 11 10.96 7.65
 5 -1 11 -3.85 7.97
 5 1 -11 -3.49 5.72
 -5 -1 -11 -1.85 7.76
 -5 -1 -11 6.86 7.7
 -5 -1 11 -0.52 3.8
 -5 1 -11 -0.61 7.45
 5 1 11 6.55 6.17
 5 -1 -11 -0.9 1.82
 -5 -1 11 4.48 7.49
 -5 -1 -12 7.63 9.14
 -5 1 12 9.93 9.18
 5 1 -12 3.94 11.37
 5 -1 12 5.02 15.17
 -5 -1 -12 15.21 7.11
 -5 -1 12 7.07 9.93
 5 -1 -12 6.32 4.28
 -5 -1 12 9.48 4.93
 5 1 12 4.7 8.21
 -5 1 -12 -0.88 9.16
 5 1 -13 24.24 9.12
 -5 1 13 21 11.86
 5 -1 13 33.49 12.18
 -5 -1 -13 29.26 11.19
 -5 -1 -13 25.25 6.08
 5 1 13 26.04 6.84
 -5 -1 13 21.88 12.42
 -5 1 -13 29.73 11.79
 5 -1 -13 23.74 4.01
 -5 -1 13 24.87 6.01
 -5 1 14 -9.09 15.84
 5 -1 14 4.5 10.47
 5 1 -14 12.96 6.91
 -5 -1 -14 3.76 5.15
 -5 -1 -14 14.52 14.76
 -5 -1 14 -6.84 17.47
 5 -1 -14 -0.25 3.62
 5 1 14 8.39 8.8
 -5 1 -14 19.6 9.59
 -5 -1 14 3.89 8.37
 -5 -1 -15 1.51 5.58
 -5 1 15 0.97 4.32
 5 -1 15 9.45 15.8
 -5 -1 -15 6.28 9.41
 5 1 -15 0.88 7.2
 -5 1 15 11.21 10.08
 5 1 15 3.6 5.92
 -5 -1 15 3.65 5.67
 5 -1 -15 -0.52 6.35
 -5 -1 15 -1.96 11.34
 -5 1 -15 4.97 10.4
 -5 1 16 10.98 10.83
 -5 -1 -16 12.96 10.98
 -5 1 16 2.43 5.11
 5 -1 16 2.41 12
 -5 -1 -16 7.54 6.3
 5 -1 -16 5.27 7.04
 -5 1 -16 15.21 11.21
 5 1 16 10.38 10.71
 -5 -1 16 3.8 6.19
 -5 -1 16 2.95 13.05
 -5 1 17 4.61 8.62
 5 1 -17 2.79 9.36
 -5 -1 -17 15.91 10.96
 -5 1 17 1.67 11.73
 5 -1 17 -12.54 12.06
 -5 -1 -17 1.46 6.44
 -5 -1 17 15.75 10.08
 5 -1 -17 -0.14 4.97
 5 1 17 4.93 6.91
 -5 -1 17 6.3 13.17
 -5 1 -17 3.44 11.46
 -5 -1 -18 15.75 12.56
 -5 -1 -18 10.53 11.07
 -5 1 18 9.32 9.14
 -5 1 18 2.12 12.38
 5 1 -18 8.01 10.38
 5 -1 18 -0.25 13.12
 5 1 18 2.18 7.65
 -5 1 -18 2.07 12.2
 -5 -1 18 16.14 21.45
 5 -1 -18 -0.86 5.74
 -5 1 19 5.15 7.56
 5 -1 19 18.07 15.3
 -5 -1 -19 39.72 15.24
 5 1 -19 13.1 12.76
 -5 1 19 23.7 21.58
 -5 1 -19 14.83 15.35
 -5 -1 19 22.01 17.06
 5 1 19 15.91 9.77
 5 -1 -19 8.06 11.37
 -5 1 20 22.55 15.12
 5 1 -20 17.92 21.2
 5 -1 20 20.39 16.79
 -5 1 20 3.62 8.26
 -5 -1 -20 15.03 15.84
 -5 1 -20 18.57 16.34
 -5 -1 20 23.65 18.23
 5 1 20 13.53 10.87
 5 -1 -20 35.18 13.03
 -5 -1 -21 -0.68 21.43
 -5 1 21 3.6 7.67
 5 1 -21 9.21 17.83
 -5 1 21 6.05 13.41
 5 -1 21 -6.66 23.61
 5 1 21 -0.88 10.31
 5 -1 -21 3.56 7.76
 -5 1 -21 -15.93 22.24
 -5 -1 21 9.79 16.27
 5 -1 22 3.42 27.14
 5 1 -22 6.71 21.11
 -5 -1 -22 11.95 15.28
 -5 1 22 6.59 15.51
 -5 1 -22 36.42 26.29
 -5 -1 22 19.81 18.25
 5 -1 -22 3.58 9.03
 5 1 22 2.52 11.88
 -5 1 23 19.29 18.73
 5 1 -23 29.33 17.13
 -5 -1 -23 1.4 19.38
 5 -1 23 28.47 30.65
 -5 1 -23 21.79 21.18
 5 -1 -23 24.35 11.46
 5 1 23 36.12 23.27
 -5 -1 23 11.7 36.08
 5 1 -24 0.68 16.56
 5 -1 24 9.95 29.01
 -5 1 24 16.52 17.47
 -5 -1 -24 4.86 18.1
 -5 -1 24 22.73 21.63
 5 1 24 23.05 22.15
 5 -1 -24 1.17 17.01
 -5 1 -24 8.33 19.15
 -5 -1 -25 -13.17 28.25
 5 1 -25 10.49 18.46
 5 -1 25 40.44 30.7
 -5 1 25 8.53 19.76
 5 -1 -25 14.43 18.34
 -5 1 -25 -7.11 20.82
 -5 -1 25 19.24 23.09
 5 1 25 12.18 24.51
 -5 -1 -26 -4.91 17.42
 -5 1 26 1.13 18.19
 5 -1 26 -25.34 29.3
 5 1 -26 16.43 17.47
 -5 1 -26 13.86 19.42
 5 -1 -26 -5.31 11.28
 -5 -1 26 8.69 21.56
 5 1 26 8.78 15.24
 5 1 -27 21.74 20.35
 -5 -1 -27 17.35 19.78
 -5 1 27 -9.41 20.93
 5 -1 27 1.13 33.76
 -5 1 -27 21.4 22.37
 -5 -1 27 6.01 36.6
 5 -1 -27 3.78 13.1
 5 1 27 -1.24 17.8
 -5 -1 -28 10.47 21.97
 5 -1 28 9.12 37.77
 -5 1 28 16.59 36.12
 5 1 -28 3.53 23.32
 -5 1 -28 45.94 24.96
 5 -1 -28 9.66 14.72
 -5 -1 28 -5.4 38.31
 5 1 28 3.83 19.27
 -5 -1 -29 34.68 34.59
 5 1 -29 11.55 24.44
 5 -1 29 30.36 41.97
 -5 1 29 12.18 24.17
 -5 1 -29 -24.64 39.66
 -5 -1 29 2.57 38.53
 5 1 29 2.09 20.5
 -5 1 30 8.21 23.45
 5 -1 30 -37.47 41.37
 -5 -1 -30 -9.18 22.53
 5 1 -30 -5.45 36.8
 -5 -1 30 -5.74 38.26
 5 1 30 3.22 19.63
 -5 1 -30 -6.14 24.62
 -5 -1 -31 11.05 27.98
 -5 1 31 21 43.93
 5 -1 31 30.68 32.72
 -5 -1 31 12.78 45.73
 -5 1 -31 13.86 29.71
 5 -1 32 -3.44 28.31
 -5 -1 -32 0.11 24.64
 -5 1 32 14.47 26.06
 -5 -1 32 -5.29 63.29
 -5 1 -32 2.39 26.9
 -5 1 33 13.5 30.79
 -5 -1 -33 21.76 46.05
 5 -1 33 8.71 34.37
 -5 1 -33 5.22 31.85
 -5 -1 33 20.77 35.47
 -5 -1 -34 5.6 26.67
 -5 1 34 6.44 28.63
 5 -1 34 0.05 32.34
 -5 1 -34 9.18 30.65
 -5 -1 34 4.39 33.51
 5 -1 35 4.12 34.91
 -5 -1 -35 -2.03 28.97
 -5 1 35 6.57 70.29
 -5 -1 35 16 37.05
 -5 1 -35 15.78 53.16
 -5 1 -35 65.11 58.25
 5 -1 36 10.58 35.29
 -5 -1 -36 16.9 29.96
 -5 1 36 -25.27 46.86
 -5 1 -36 10.8 38.6
 -5 -1 36 28.74 37.65
 -6 -1 0 0.11 3.87
 -6 1 0 3.87 5.2
 6 -1 0 7.29 3.29
 6 -1 0 0.7 9.07
 -6 1 0 0.83 6.57
 -6 -1 0 5.72 4.5
 -6 -1 0 0.61 0.92
 6 -1 1 29.1 10.47
 -6 1 1 18.46 7.9
 -6 -1 -1 11.48 5.56
 -6 1 1 12.06 3.71
 -6 -1 -1 22.17 7
 6 -1 1 13.39 4.48
 -6 1 -1 10.4 7.43
 6 -1 -1 5.65 3.56
 -6 -1 1 17.44 5.24
 -6 -1 1 12.6 4.97
 -6 -1 1 14.49 5.36
 -6 1 -1 7.81 4.64
 6 -1 -1 18.1 7.36
 -6 1 2 3.71 4.1
 6 -1 2 -1.15 5.96
 6 -1 2 2.14 4.05
 -6 -1 -2 0.99 0.99
 -6 1 2 8.94 6.73
 -6 -1 -2 8.82 3.74
 -6 -1 -2 5.9 7.52
 6 -1 -2 2.99 5.96
 -6 1 -2 6.93 6.19
 -6 1 -2 -2.14 6.8
 6 -1 -2 -2.61 2.36
 -6 -1 2 -3.87 5.13
 -6 -1 2 2.86 6.84
 -6 -1 2 0.36 0.77
 6 -1 3 18.95 6.98
 6 -1 3 9.36 5.13
 -6 1 3 22.33 7.83
 -6 1 3 3.89 2.93
 -6 -1 -3 3.49 3.76
 -6 -1 -3 6.71 6.12
 6 -1 -3 8.37 6.68
 6 -1 -3 10.42 2.27
 6 1 3 5.06 3.49
 -6 1 -3 8.62 7
 -6 1 -3 1.15 5.11
 -6 -1 3 4.39 6.05
 6 -1 4 10.15 6.84
 -6 -1 -4 24.35 7.27
 -6 1 4 17.96 5.04
 -6 -1 -4 28.04 4.28
 -6 1 4 17.13 15.44
 6 -1 4 37 8.62
 -6 1 -4 34.82 8.6
 -6 1 -4 23.23 6.59
 6 -1 -4 23.81 3.4
 6 1 4 16.23 8.76
 6 1 4 25.81 3.94
 -6 -1 4 8.06 11.25
 6 -1 -4 27.26 8.64
 -6 1 5 95.41 14.58
 6 -1 5 97.97 12.22
 -6 -1 -5 105.62 6.39
 -6 -1 -5 68.4 11.28
 -6 1 5 65.76 5.24
 6 -1 5 54.11 9.86
 -6 1 -5 98.08 12.4
 -6 -1 5 65.88 11.21
 6 1 5 72.43 17.29
 6 -1 -5 71.03 2.63
 6 1 5 96.89 5.36
 6 -1 -5 85.03 18.37
 -6 1 -5 61.6 9.52
 -6 -1 -6 164.37 7.83
 6 -1 6 87.73 14.34
 6 -1 6 213.11 18.34
 -6 -1 -6 147.24 14.79
 -6 1 -6 119.82 20.44
 -6 -1 6 185.23 11.34
 -6 1 -6 178.45 17.1
 6 -1 -6 163.31 16.45
 6 1 6 102.79 16.79
 -6 -1 6 113.93 15.84
 6 1 6 226.64 11.1
 6 -1 7 37.81 10.89
 -6 -1 -7 17.44 8.91
 -6 -1 7 23.63 5.96
 -6 1 -7 5.56 15.28
 -6 1 -7 31.55 12.54
 6 1 7 23.43 3.71
 -6 -1 7 17.4 9.84
 -6 -1 -8 33.24 6.71
 6 -1 8 35 10.51
 -6 -1 8 21.81 10.85
 -6 1 -8 3.4 15.53
 6 1 8 34.86 6.28
 -6 1 -8 37.45 16.83
 6 -1 9 6.3 8.82
 -6 -1 -9 12.81 8.73
 -6 -1 -9 10.33 6.17
 6 1 9 2.86 3.56
 -6 1 -9 16.05 13.41
 -6 -1 9 12.33 14.25
 -6 1 -9 3.83 9.16
 -6 -1 9 11.37 4.82
 -6 -1 -10 -3.11 8.57
 -6 -1 -10 2.86 3.71
 6 1 -10 0.65 0.83
 6 -1 10 1.64 8.33
 6 1 10 10.53 6.01
 -6 1 -10 -1.04 12.78
 -6 -1 10 -4.79 8.39
 -6 -1 10 3.22 6.1
 6 -1 11 -2.54 9.07
 -6 -1 -11 7.43 6.19
 6 1 -11 10.11 7.79
 -6 -1 -11 22.55 12.78
 -6 -1 11 -7.63 9.14
 -6 1 -11 -1.94 13.82
 -6 -1 11 0.95 4.19
 6 -1 -11 0.47 1.6
 6 1 11 6.8 6.41
 -6 -1 -12 9.95 9.45
 -6 1 12 0.65 10.13
 6 -1 12 3.22 9.68
 -6 -1 -12 19.42 10.24
 6 1 -12 10.08 9.07
 -6 1 -12 2.63 15.87
 6 -1 -12 3.11 2.25
 -6 -1 12 -1.24 10.4
 -6 -1 12 2.18 4.43
 6 1 12 9.14 5.18
 -6 -1 -13 4.68 10.96
 6 1 -13 6.84 7.45
 -6 -1 -13 24.51 12.56
 6 -1 13 35.52 17.49
 -6 1 13 19.22 17.89
 6 1 13 3.53 10.47
 -6 1 -13 10.08 17.13
 -6 -1 13 12.54 5.09
 -6 -1 13 9.05 11.41
 6 -1 14 4.82 11.52
 6 1 -14 2.32 7.7
 -6 -1 -14 18.66 15.78
 -6 -1 -14 5.27 5.85
 -6 1 14 3.78 11.21
 6 1 14 7.27 6.64
 -6 -1 14 8.24 11.86
 6 -1 -14 4.77 2.79
 -6 -1 14 5.54 4.82
 -6 1 -14 -1.13 10.94
 -6 -1 -15 7.97 10.76
 -6 1 15 -0.34 18.3
 6 -1 15 1.6 11.34
 6 1 -15 7.11 13.5
 -6 -1 -15 5.69 6.08
 6 -1 -15 3.17 5.24
 6 1 15 7.63 7.2
 -6 -1 15 15.66 12.09
 -6 -1 15 4.34 5.72
 -6 1 -15 5.02 11.32
 -6 -1 -16 3.96 10.31
 -6 1 16 2.16 12.18
 -6 -1 -16 13.62 11.05
 6 1 -16 0.54 9.3
 -6 1 -16 7.56 12.47
 -6 -1 16 8.67 20.12
 -6 -1 16 8.12 5.78
 6 -1 -16 2.75 6.28
 6 1 16 9.21 12.18
 6 1 -17 34.21 19.2
 -6 -1 -17 30.34 9.36
 -6 1 17 42.9 15.89
 6 -1 17 53.3 16.02
 -6 -1 -17 17.96 15.1
 -6 1 -17 40.76 15.8
 -6 -1 17 37.34 18.48
 6 -1 -17 24.91 6.39
 -6 -1 17 24.91 12.22
 6 1 17 32.99 10.17
 6 -1 18 9.3 13.68
 6 1 -18 0.2 9.45
 -6 -1 -18 -1.58 13.71
 -6 1 18 8.64 13.5
 -6 -1 -18 0.52 11.25
 -6 1 -18 16.16 13.68
 6 1 18 3.83 8.51
 6 -1 -18 5.13 5.58
 -6 -1 18 10.06 15.19
 -6 -1 18 11.82 6.98
 -6 1 19 8.44 14.02
 6 -1 19 5.9 13.32
 -6 -1 -19 2.43 13.84
 6 1 -19 6.48 9.12
 6 1 19 -1.76 8.69
 6 -1 -19 2.97 5.72
 -6 -1 19 4.68 15.33
 -6 1 -19 -5.65 14.13
 -6 1 20 23.05 23.29
 -6 -1 -20 17.33 15.03
 6 1 -20 -14.22 10.51
 6 -1 20 21.04 15.03
 -6 1 20 5.4 6.37
 6 1 20 8.71 15.39
 -6 -1 20 13.53 25.84
 -6 1 -20 4.05 14.74
 6 -1 -20 6.77 6.98
 6 1 -21 33.8 19.49
 6 -1 21 27.19 18.66
 -6 1 21 26.9 17.83
 -6 1 21 13.48 8.26
 -6 -1 -21 18.75 28.16
 6 -1 -21 12.92 9
 -6 -1 21 36.55 21.94
 6 1 21 27.05 12.56
 -6 1 -21 17.31 18.3
 -6 1 22 26.24 19.92
 6 -1 22 48.34 31.71
 -6 -1 -22 23.32 19.58
 6 1 22 26.47 14.11
 6 -1 -22 15.73 16.07
 -6 1 -22 25.7 20.86
 -6 -1 22 41.32 23.68
 6 1 -23 24.94 25.32
 6 -1 23 32.43 31.78
 -6 1 23 1.89 29.24
 -6 -1 -23 -6.75 18.68
 6 -1 -23 14.13 17.62
 -6 1 -23 24.1 31.8
 6 1 23 23.34 14.67
 -6 -1 23 20.62 23.2
 -6 1 24 25.5 19.22
 6 1 -24 27.46 26.67
 -6 -1 -24 15.89 18.77
 6 -1 24 0.7 32.41
 -6 -1 24 20.86 22.3
 6 1 24 8.12 15.57
 -6 1 -24 11.21 21.09
 6 -1 -24 2.3 12.22
 -6 1 25 -2.86 17.58
 6 1 -25 5.11 16.02
 -6 -1 -25 32 26.67
 6 -1 25 18.41 30.63
 6 -1 -25 -4.73 11.43
 6 1 25 -3.33 14.92
 -6 -1 25 9 33.4
 -6 1 -25 11.41 19
 -6 1 26 14.99 33.11
 -6 -1 -26 12.47 19.24
 6 -1 26 -1.37 22.66
 6 1 -26 4.59 19.81
 -6 1 -26 20.55 21.34
 6 1 26 2.77 17.74
 6 -1 -26 2.75 12.74
 -6 -1 26 10.76 23.77
 6 1 -27 3.29 20.19
 6 -1 27 -13.64 23
 -6 -1 -27 -5.09 19.69
 -6 1 27 5.72 20.37
 -6 1 -27 5.24 22.17
 -6 -1 27 15.69 24.33
 6 1 27 10.58 18.12
 -6 -1 -28 22.82 21.58
 6 1 -28 8.85 23.9
 6 -1 28 4.88 25.72
 -6 1 28 -0.38 22.93
 6 1 28 7.27 20.37
 -6 1 -28 -17.33 24.73
 -6 -1 28 19.47 26.78
 6 -1 29 4.39 25.12
 -6 -1 -29 3.92 21.61
 -6 1 29 -5.09 34.98
 -6 -1 29 -5.04 40.38
 -6 1 -29 -12.18 24.55
 6 1 29 15.87 20.14
 -6 1 30 17.44 26.47
 6 -1 30 9.25 45.62
 -6 -1 -30 6.77 25.63
 -6 1 -30 -18.77 42.6
 -6 -1 30 13.53 42.6
 -6 1 31 -21.09 28.99
 -6 -1 -31 -14.04 27.89
 6 -1 31 -23.74 50.17
 -6 1 -31 -4.79 30.72
 -6 -1 31 11.7 45.89
 6 -1 32 69.07 53.9
 -6 -1 -32 10.53 29.96
 -6 1 32 -3.44 30.72
 -6 1 -32 25.5 32.25
 -6 -1 32 11.14 49.45
 -6 1 33 -7.85 44.32
 6 -1 33 8.73 46.48
 -6 -1 -33 -27.77 26.67
 -6 -1 33 45.04 43.8
 -6 1 -33 20.89 28.85
 6 -1 34 17.38 53.86
 -6 1 34 -2.59 33.4
 -6 -1 -34 18.34 46.43
 -6 -1 34 59.24 79.83
 -6 1 -34 12.6 34.41
 6 -1 35 -1.87 29.55
 -6 -1 -35 -4.1 26.13
 -6 1 35 13.86 29.17
 -6 -1 35 4.16 32.97
 -6 1 -35 -2.97 30.9
 -6 1 36 -9.39 50.93
 -6 -1 -36 -5.04 29.37
 -6 1 -36 0.59 52.69
 -6 1 -36 44.92 58.54
 -6 -1 36 24.33 36.96
 -7 -1 0 -4.79 4.48
 7 -1 0 0.74 3.51
 -7 1 0 -2.16 7.09
 -7 1 0 1.91 3.56
 7 -1 0 7 6.66
 -7 -1 0 -1.76 4.57
 -7 -1 0 0.45 0.88
 -7 1 1 28.74 7.76
 -7 -1 -1 47.51 7.56
 7 -1 1 58.94 9.86
 -7 -1 -1 30.99 6.82
 -7 -1 1 29.66 7.52
 -7 1 -1 52.08 15.96
 -7 1 -1 44.07 9.3
 7 -1 -1 67.5 9.95
 7 -1 -1 31.55 5.02
 -7 -1 1 33.38 10.53
 7 -1 2 155.3 20.23
 -7 1 2 86.85 9.36
 7 -1 2 73.53 9.77
 -7 -1 -2 140.44 14.27
 -7 -1 -2 112.58 12.09
 -7 1 -2 124.17 14.25
 -7 -1 2 119.82 9.95
 -7 1 -2 88.02 10.29
 -7 -1 2 90.52 16.25
 7 -1 -2 140.76 19.6
 -7 -1 2 107.63 11.77
 7 -1 -2 142.51 9.59
 -7 -1 -3 3.6 5.87
 -7 -1 -3 2.99 4.57
 7 -1 3 -0.68 4.77
 7 -1 3 1.04 7.18
 -7 1 3 -1.06 4.59
 7 -1 -3 0.41 7.36
 -7 -1 3 14.49 9.75
 7 -1 -3 3.96 2.52
 7 1 3 4.07 4.19
 -7 -1 3 6.35 4.48
 -7 1 -3 11.25 8.24
 -7 1 -3 -1.42 5.15
 -7 -1 3 6.35 6.08
 7 -1 4 -1.64 6.48
 7 -1 4 1.24 4.79
 -7 -1 -4 4.16 5.67
 7 1 -4 -0.43 0.74
 -7 1 4 0.18 3.6
 -7 -1 -4 3.56 5.49
 -7 1 -4 7.94 6.91
 -7 -1 4 -0.07 0.88
 7 -1 -4 0.68 1.87
 7 -1 -4 -1.51 6.46
 -7 -1 4 -2.59 6.3
 -7 1 -4 -4.64 5.06
 7 1 4 9.34 5.31
 7 1 4 5.99 6.64
 -7 -1 -5 4.88 5.92
 -7 1 5 1.98 2.9
 7 -1 5 -5.76 5.83
 7 -1 5 9.05 7.45
 -7 -1 -5 -0.65 6.44
 7 1 5 12.42 5.49
 7 -1 -5 1.4 1.35
 -7 1 -5 6.8 10.08
 -7 -1 5 6.62 7.2
 7 -1 -5 8.78 7.81
 -7 1 -5 6.84 7.81
 -7 -1 -6 11.84 4.5
 7 -1 6 21.67 13.35
 -7 -1 -6 7.58 8.06
 -7 -1 6 16.47 8.78
 -7 1 -6 9.68 8.12
 -7 1 -6 10.69 9.66
 7 -1 -6 8.55 9.32
 7 1 6 14.54 6.21
 -7 -1 6 11.86 5.72
 -7 -1 -7 144.22 27.23
 -7 -1 -7 234.56 11.95
 7 -1 7 229.72 20.3
 -7 1 -7 124.55 19.65
 -7 -1 7 249.62 19.65
 7 1 7 269.65 11.52
 -7 -1 7 152.41 20.41
 7 -1 8 168.21 19.56
 -7 -1 -8 78.75 16.61
 -7 -1 -8 124.75 9.16
 7 1 8 137.83 8.19
 -7 1 -8 51.7 16.27
 -7 -1 8 78.5 25.63
 -7 -1 8 158.49 14.88
 -7 -1 -9 162.54 23.74
 7 -1 9 203.23 24.55
 -7 -1 -9 278.2 17.22
 -7 1 -9 182.91 23.27
 -7 -1 9 308.45 15.1
 7 1 9 233.26 11.46
 -7 -1 9 159.03 25.12
 7 -1 10 35.49 12.56
 -7 -1 -10 12.4 19.42
 -7 -1 -10 41.34 6.73
 7 1 10 33.06 8.51
 -7 -1 10 38.44 9.25
 -7 -1 10 20.48 13.39
 -7 1 -10 15.62 12.72
 7 -1 11 30.68 20.19
 -7 -1 -11 19.24 12.51
 -7 -1 -11 38.85 9.84
 -7 1 -11 21.09 13.17
 -7 -1 11 35.99 6.1
 -7 -1 11 36.01 20.39
 7 1 11 40.71 9
 -7 -1 -12 18.16 13.28
 -7 1 12 26.69 14.74
 -7 -1 -12 26.94 6.75
 7 -1 12 37.45 13.71
 -7 -1 12 21.97 14.47
 -7 1 -12 39.32 13.71
 -7 -1 12 47.22 9.36
 -7 1 13 1.94 11.1
 -7 -1 -13 3.08 5.54
 -7 -1 -13 18.46 10.06
 7 -1 13 -0.2 10.4
 -7 -1 13 11.39 11.21
 -7 -1 13 0.29 4.3
 -7 1 -13 3.58 10.83
 7 1 13 -3.65 9.36
 -7 1 14 12.04 13.35
 -7 -1 -14 15.42 9.32
 -7 -1 -14 -3.06 12.36
 7 1 -14 6.91 10.26
 7 -1 14 13.91 12.65
 -7 -1 14 1.98 20.68
 -7 1 -14 19.33 19.9
 7 1 14 19.04 7.2
 -7 -1 14 6.21 5.09
 -7 -1 -15 4.28 6.14
 7 -1 15 6.35 11.48
 -7 -1 -15 10.35 10.85
 -7 1 15 9.79 12.54
 7 1 -15 1.49 6.59
 7 1 15 5.15 6.86
 7 -1 -15 -1.35 2.93
 -7 -1 15 5.85 7.58
 -7 -1 15 7.22 12.09
 -7 1 -15 9.72 17.89
 7 1 -16 -2.25 7.72
 -7 -1 -16 5.29 10.42
 -7 1 16 5.9 19.4
 7 -1 16 6.55 12.2
 -7 -1 -16 15.17 11.77
 7 -1 -16 0.16 4.07
 -7 -1 16 8.71 8.64
 -7 -1 16 0.79 13.55
 7 1 16 3.53 12.11
 -7 1 -16 -0.05 11.84
 7 1 -17 26.24 15.42
 -7 -1 -17 -9.57 21.74
 7 -1 17 27.28 22.17
 -7 -1 -17 12.96 8.1
 -7 1 17 16.38 14.58
 7 -1 -17 8.01 4.01
 -7 1 -17 12.96 14.83
 7 1 17 18.46 10.29
 -7 -1 17 18.41 16.25
 -7 -1 17 9.84 6.41
 -7 1 18 28.88 18.34
 -7 -1 -18 34.32 15.08
 -7 -1 -18 16.99 18.41
 7 1 -18 37.14 13.28
 7 -1 18 40.17 17.87
 -7 1 -18 51.97 18.3
 -7 -1 18 58.52 31.71
 7 -1 -18 15.3 9.07
 7 1 18 41.86 12.67
 -7 -1 18 25.52 8.15
 -7 1 19 150.52 28.2
 7 -1 19 155.75 27.03
 7 1 -19 126.55 21.13
 -7 -1 -19 114.87 16.5
 -7 -1 -19 124.66 27.3
 -7 1 -19 97 27.26
 7 -1 -19 68.42 14.99
 -7 -1 19 120.66 31.17
 -7 -1 19 98.56 19.99
 7 1 19 166.98 29.55
 -7 -1 -20 11.34 19.6
 -7 1 20 45.67 19.33
 7 -1 20 48.23 18.79
 7 1 -20 21.99 22.39
 7 1 20 42.72 13.23
 -7 1 -20 32.61 20.26
 7 -1 -20 4.68 7.63
 -7 -1 20 12.11 21.49
 7 1 -21 46.61 19.67
 -7 1 21 92.93 38.94
 7 -1 21 97.86 25.66
 -7 -1 -21 73.12 38.4
 7 1 21 88.77 17.6
 7 -1 -21 43.48 11.61
 -7 -1 21 73.96 27.84
 -7 1 -21 75.06 25.41
 -7 1 22 9.75 19.31
 -7 -1 -22 9.03 18.82
 7 1 -22 2.23 15.12
 7 -1 22 18.88 29.64
 -7 1 -22 24.46 19.67
 7 1 22 24.64 12.99
 7 -1 -22 11.95 9.05
 -7 -1 22 20.37 33.33
 7 -1 23 -0.59 25.32
 7 1 -23 3.29 12.78
 -7 -1 -23 9.95 15.84
 -7 1 23 -5.13 16.02
 -7 -1 23 14.63 18.84
 7 1 23 15.39 16.56
 -7 1 -23 -7.43 16.45
 7 -1 -23 -6.08 7.99
 7 -1 24 0.29 30.79
 -7 -1 -24 16.43 19.15
 -7 1 24 10.06 29.17
 7 1 -24 9.36 23.45
 7 1 24 0.11 20.21
 -7 1 -24 18.5 32.27
 7 -1 -24 4.37 16
 -7 -1 24 -3.65 21.85
 -7 1 25 6.46 19
 7 1 -25 5.96 20.55
 7 -1 25 -11.43 20.35
 -7 -1 -25 14.38 29.35
 -7 -1 25 8.42 22.37
 7 1 25 -2.5 20.98
 -7 1 -25 6.05 20.91
 -7 -1 -26 12.49 20.28
 7 1 -26 10.33 22.28
 7 -1 26 -4.68 22.89
 -7 1 26 9.54 20.82
 -7 1 -26 13.71 23.11
 -7 -1 26 9.36 24.64
 7 1 26 0.43 16.02
 -7 -1 -27 31.26 23.47
 7 -1 27 7.74 26.56
 -7 1 27 19.04 36.75
 -7 -1 27 35.31 45.96
 -7 1 -27 4.07 26.27
 7 1 27 13.28 18.86
 7 -1 28 13.32 27.01
 -7 1 28 2.72 24.98
 -7 -1 -28 29.42 23.38
 -7 1 -28 8.53 26.6
 -7 -1 28 -12.58 29.71
 -7 1 29 3.29 27.41
 -7 -1 -29 29.73 25.75
 7 -1 29 33.8 29.35
 -7 -1 29 9.3 31.35
 -7 1 -29 -8.48 29.37
 -7 1 30 21.85 29.39
 -7 -1 -30 18.19 45.31
 7 -1 30 14.45 32.88
 -7 -1 30 15.98 33.98
 -7 1 -30 17.08 30.74
 -7 1 31 4.39 26.94
 -7 -1 -31 -3.4 26.33
 7 -1 31 14.72 29.46
 -7 1 -31 0.25 43.3
 -7 -1 31 0.07 46.81
 -7 1 32 4.95 29.84
 7 -1 32 30.79 32.07
 -7 -1 -32 -17.1 29.1
 -7 -1 32 20.75 47.02
 -7 1 -32 18.16 32.12
 -7 -1 -33 -10.87 28.16
 -7 1 33 18.46 28.52
 7 -1 33 -16.16 30.32
 -7 1 -33 17.24 30.47
 -7 -1 33 7.22 45.98
 -7 -1 -34 1.13 49.54
 7 -1 34 -21.34 53.27
 -7 -1 34 0.41 52.13
 -7 1 -34 30.74 34.95
 -7 1 35 5.81 29.98
 -7 -1 -35 16.5 26.81
 -7 -1 35 -21.7 47.74
 -7 1 -35 -13.32 31.08
 8 -1 0 201.79 13.3
 -8 -1 0 233.17 16.88
 -8 -1 0 253.74 16.05
 8 -1 0 249.57 27.48
 -8 1 0 247.62 18.23
 -8 -1 -1 29.15 11.14
 8 -1 1 21.94 5.99
 8 -1 1 28.38 9.9
 -8 -1 -1 18.5 7.61
 -8 1 1 24.04 5.11
 8 -1 -1 19.06 8.03
 -8 -1 1 17.26 9.61
 -8 -1 1 18.93 7.52
 -8 1 -1 17.35 6.08
 8 -1 -1 26.58 9.68
 -8 -1 -2 39.09 7.72
 8 -1 2 35.97 7.61
 -8 -1 -2 35.81 8.64
 8 -1 2 41.32 10.51
 -8 1 2 43.3 5.38
 8 -1 -2 39.3 5.49
 -8 -1 2 33.29 13.75
 -8 1 -2 35.07 7.56
 8 -1 -2 57.19 10.2
 -8 -1 2 42.47 6.91
 -8 -1 2 41.88 14.2
 8 -1 3 55.5 15.93
 8 -1 3 29.75 7.79
 -8 -1 -3 37.59 8.62
 -8 -1 -3 40.33 7.47
 -8 1 3 30.74 4.64
 8 1 3 11.55 7.25
 8 -1 -3 27.86 15.82
 -8 -1 3 31.94 8.98
 -8 -1 3 26.94 9.12
 -8 1 -3 24.8 7.72
 -8 -1 3 32.72 6.41
 8 -1 4 9.14 6.86
 -8 -1 -4 7.58 7.34
 -8 -1 -4 9.43 8.89
 8 -1 4 9.34 8.67
 -8 1 4 6.12 4.75
 -8 1 -4 10.15 11.12
 8 -1 -4 9.03 8.98
 8 1 4 12.78 5.18
 -8 -1 4 3.69 12.83
 8 -1 -4 5.4 3.83
 -8 -1 4 14.43 7.58
 -8 -1 -5 566.13 24.67
 8 -1 5 575.51 32.03
 -8 -1 -5 536.42 31.69
 -8 1 5 514.72 18.86
 -8 -1 5 564.58 22.84
 8 1 5 565.79 23.45
 8 -1 -5 537.7 33.13
 8 -1 -5 357.07 14.09
 -8 1 -5 530.14 32.54
 -8 -1 5 570.65 34.91
 8 -1 6 105.44 21.36
 -8 -1 -6 91.6 13.57
 -8 1 6 73.82 5.31
 -8 -1 -6 105.49 20.21
 8 -1 -6 85.43 15.17
 8 1 6 94.84 8.01
 -8 1 -6 96.49 13.53
 -8 -1 6 97.03 15.46
 8 -1 7 546.19 35.92
 -8 -1 -7 554.22 37.36
 -8 -1 -7 572.48 25.3
 -8 1 -7 545.15 35.97
 8 1 7 586.57 23.61
 -8 -1 7 524.24 37.86
 -8 -1 7 569.06 34.07
 8 -1 8 27.48 10.92
 -8 -1 -8 14.88 10.78
 -8 -1 -8 20.55 6.62
 -8 -1 8 15.89 11.52
 -8 -1 8 12.65 9.75
 8 1 8 21.63 5.58
 -8 1 -8 9.07 10.58
 8 -1 9 21.67 11.12
 -8 -1 -9 3.53 11.07
 -8 -1 -9 22.01 6.19
 -8 -1 9 0.14 17.85
 -8 1 -9 13.82 10.69
 8 1 9 14.88 5.06
 -8 -1 9 13.08 5.33
 8 -1 10 20.46 14.88
 -8 -1 -10 34.55 10.35
 -8 -1 -10 19.74 12.4
 -8 1 -10 38.49 13.12
 8 1 10 30.16 6.17
 -8 -1 10 19.11 14.13
 -8 -1 10 32.07 6.28
 -8 -1 -11 31.85 13.03
 8 -1 11 33.13 14.56
 -8 -1 -11 30.99 7.34
 -8 1 -11 25.18 13.3
 8 1 11 27.59 6.35
 -8 -1 11 33.08 9.39
 -8 -1 11 23.43 14.63
 8 -1 12 24.44 12.24
 -8 1 12 12.36 19.92
 -8 -1 -12 2.34 11.77
 -8 -1 -12 8.37 6.41
 -8 -1 12 5.4 20.68
 8 1 12 11.73 8.87
 -8 1 -12 4.48 11.86
 -8 -1 12 11.59 4.86
 8 -1 13 53.75 16.72
 -8 1 13 48.82 17.38
 -8 -1 -13 43.93 24.01
 -8 -1 -13 44.72 12.96
 8 1 13 45.94 11.82
 -8 -1 13 48.43 17.19
 -8 -1 13 50.12 6.5
 -8 1 -13 48.1 17.17
 -8 -1 -14 1.4 10.35
 -8 1 14 16.16 20.21
 -8 -1 -14 16.41 11.82
 8 -1 14 27.62 19.31
 -8 -1 14 0.81 13.35
 -8 -1 14 4.7 7.13
 -8 1 -14 7.92 12.45
 8 1 14 0.95 6.26
 -8 -1 -15 21.58 12.72
 8 -1 15 27.62 15.37
 -8 1 15 23.81 17.35
 -8 -1 -15 29.3 15.12
 8 1 15 18.61 9.36
 -8 -1 15 18.55 8.53
 -8 -1 15 27.44 17.22
 -8 1 -15 33.42 25.43
 -8 -1 -16 3.42 16.25
 -8 -1 -16 1.4 13.5
 -8 1 16 4.28 15.6
 8 -1 16 3.53 13.3
 -8 -1 16 8.98 23.29
 -8 1 -16 -4.28 21.34
 8 1 16 21.11 13.73
 -8 -1 16 5.4 8.21
 8 -1 17 30.25 23.74
 -8 -1 -17 21.85 25.57
 -8 1 17 11.79 16.81
 -8 -1 -17 22.78 8.82
 8 1 17 8.44 10.08
 -8 -1 17 12.67 17.26
 -8 1 -17 3.74 15.98
 -8 -1 17 11.95 6.05
 -8 -1 -18 78.3 24.33
 8 1 -18 54.83 12.63
 8 -1 18 79.45 22.33
 -8 -1 -18 80.73 12.6
 -8 1 18 66.51 23.54
 -8 -1 18 77.51 25.07
 -8 1 -18 73.48 23.52
 8 1 18 84.04 22.6
 -8 -1 18 59.6 9.5
 8 1 -19 13.05 9.9
 8 -1 19 15.84 16.97
 -8 -1 -19 22.87 18.23
 -8 1 19 50.12 28.56
 -8 1 -19 6.84 18.43
 8 1 19 12.63 12.49
 -8 -1 19 17.31 19.54
 -8 -1 19 11.61 11.39
 8 -1 20 29.55 18.37
 -8 1 20 23.56 20.84
 8 1 -20 19.85 12.22
 -8 -1 -20 40.62 20.48
 -8 -1 20 2.66 22.44
 -8 1 -20 20.39 21.09
 8 1 20 15.35 14.76
 -8 1 21 322.88 40.85
 8 -1 21 301.14 37.2
 8 1 -21 226.96 27.21
 -8 -1 -21 279.53 56.67
 8 1 21 366.32 43.35
 8 -1 -21 83.72 16.09
 -8 1 -21 270.93 40.65
 -8 -1 21 288.06 43.87
 -8 1 22 26.36 34.12
 -8 -1 -22 34.19 21.63
 8 1 -22 20.71 22.37
 8 -1 22 45.35 32.34
 -8 1 -22 17.4 22.93
 -8 -1 22 19.15 26.06
 8 1 22 18.03 17.47
 8 -1 23 407.71 72.16
 -8 -1 -23 301 51.45
 8 1 -23 199.77 55.59
 -8 1 23 301.5 51.4
 8 1 23 376.44 40.26
 -8 -1 23 344.8 58
 -8 1 -23 326.03 55.57
 -8 1 24 -10.98 20.46
 8 -1 24 1.15 20.19
 -8 -1 -24 0.7 20.35
 8 1 -24 10.35 15.37
 8 1 24 10.89 14.22
 -8 1 -24 53.97 32.27
 -8 -1 24 -10.8 36.66
 -8 -1 -25 38.31 35.99
 8 -1 25 20.57 23.18
 -8 1 25 34.32 36.21
 8 1 25 7.65 15.75
 -8 1 -25 32.57 39.72
 -8 -1 25 4.25 26.94
 -8 1 26 15.69 24.82
 -8 -1 -26 18.75 23.81
 8 -1 26 29.84 26.2
 8 1 26 4.12 24.1
 -8 1 -26 17.1 27.08
 -8 -1 26 9.27 28.65
 8 -1 27 -6.95 25.75
 -8 -1 -27 11.12 23.86
 -8 1 27 20.12 24.13
 -8 -1 27 12.54 28.25
 -8 1 -27 8.69 26.02
 8 -1 28 -8.1 24.28
 -8 1 28 9.66 34.84
 -8 -1 -28 7.52 22.06
 -8 1 -28 -7.58 24.53
 -8 -1 28 24.6 40.4
 -8 1 29 24.1 29.87
 -8 -1 -29 12.11 27.91
 8 -1 29 23.97 32.25
 -8 -1 29 17.78 34.71
 -8 1 -29 14.97 31.44
 -8 1 30 20.73 26.51
 8 -1 30 6.53 27.64
 -8 -1 -30 -9.79 39.95
 -8 1 -30 -5.33 27.01
 -8 -1 30 -8.69 29.03
 -8 -1 -31 -20.48 24.64
 -8 1 31 8.33 25.03
 8 -1 31 -11.64 27.71
 -8 1 -31 11.01 41.05
 -8 -1 31 23.61 28.92
 -8 -1 -32 11.59 30.43
 8 -1 32 15.57 33.47
 -8 1 32 9.97 32.27
 -8 1 -32 -3.31 51.11
 -8 -1 32 -2.9 35.49
 -8 -1 -33 -49.18 31.73
 -8 1 33 1.58 33.11
 8 -1 33 -4.39 33.94
 -8 -1 33 70.63 80.96
 -8 1 -33 11.97 33.65
 -8 -1 -34 19.27 55.46
 -8 1 34 7.36 36.39
 -8 1 -34 29.19 37.65
 -8 -1 34 10.02 57.44
 -9 -1 0 0.65 7.02
 9 -1 0 10.58 5.04
 -9 1 0 9.77 7.16
 -9 -1 0 -2.05 5.42
 9 -1 0 -2.21 7.83
 -9 -1 0 0.56 1.69
 9 -1 1 221.64 22.3
 -9 -1 -1 256.89 16.59
 -9 1 1 262.67 13.37
 9 -1 1 266.05 16.81
 9 -1 -1 259.01 18.23
 -9 1 -1 257.88 15.17
 9 -1 -1 221.67 20.08
 -9 -1 1 250.84 15.87
 -9 -1 -2 156.6 20.35
 9 -1 2 188.45 14.65
 -9 1 2 174.67 13.77
 -9 -1 -2 174.94 20.8
 9 -1 2 180.39 18.84
 9 -1 -2 161.71 9.66
 -9 1 -2 182.8 12.96
 9 -1 -2 146 17.42
 -9 -1 2 182.98 12.51
 -9 -1 -3 -0.45 6.89
 9 -1 3 3.31 6.91
 -9 -1 -3 0.68 10.65
 9 -1 3 13.55 8.71
 -9 1 3 6.01 3.56
 9 -1 -3 10.33 8.48
 -9 1 -3 3.89 9.84
 -9 -1 3 8.44 7.94
 9 -1 -3 1.08 3.53
 -9 -1 3 10.67 7.97
 -9 1 4 73.33 8.19
 9 -1 4 52.4 13.26
 -9 -1 -4 68.78 10.42
 -9 -1 -4 66.15 11.57
 -9 -1 4 73.75 13.01
 -9 -1 4 66.6 7.83
 -9 1 -4 86.83 17.26
 9 -1 -4 67.34 13.48
 9 -1 -4 70.22 5.2
 9 1 4 64.41 9.03
 -9 1 5 22.75 3.67
 9 -1 5 19.72 10.98
 -9 -1 -5 17.24 7.58
 -9 1 -5 10.83 9.72
 -9 -1 5 31.8 11.07
 9 -1 -5 20.26 4.23
 -9 -1 5 20.89 5.78
 9 1 5 27.14 10.04
 9 -1 -5 17.35 11.5
 -9 -1 -6 19.58 10.26
 -9 -1 -6 16.41 7.72
 9 -1 6 27.71 16.27
 -9 1 -6 15.6 9.72
 9 1 6 10.26 9.21
 -9 -1 6 13.3 5.27
 9 -1 -6 18.37 11.23
 -9 -1 6 20.77 11.23
 -9 -1 -7 337.04 25.97
 9 -1 7 291.95 24.94
 -9 -1 -7 303.91 25.34
 -9 -1 7 302.94 14.58
 -9 -1 7 330.98 38.8
 9 1 7 278.45 15.24
 -9 1 -7 312.53 24.85
 -9 -1 7 297.38 17.38
 -9 -1 -8 40.62 8.35
 9 -1 8 24.31 12.69
 -9 -1 -8 27.95 12.74
 9 1 8 24.13 6.71
 -9 1 -8 32.68 12.4
 -9 -1 8 22.93 13.26
 -9 -1 8 36.26 11.46
 9 -1 9 40.74 13.44
 -9 -1 -9 38.76 13.08
 -9 -1 -9 43.24 13.66
 9 1 9 38.17 7.4
 -9 -1 9 30.86 11.52
 -9 -1 9 29.26 14.56
 -9 1 -9 50.3 13.41
 9 -1 10 64.73 16.23
 -9 -1 -10 64.08 15.75
 -9 -1 -10 58.7 15.69
 -9 1 -10 69.05 16.65
 -9 -1 10 70.87 8.64
 -9 -1 10 75.76 26.33
 9 1 -11 0.25 0.63
 -9 -1 -11 4.86 5.72
 -9 -1 -11 -2.86 9.68
 9 -1 11 5.09 10.15
 -9 1 -11 7.61 10.42
 9 1 11 0.29 4.86
 -9 -1 11 4.32 6.57
 -9 -1 11 -13.66 11.19
 -9 -1 -12 5.2 19.58
 -9 -1 -12 6.3 7.43
 9 -1 12 11.12 22.21
 -9 1 -12 17.69 13.1
 -9 -1 12 11.3 14.29
 -9 -1 12 9.43 7.49
 9 1 12 9.86 6.35
 9 -1 13 10.51 12.51
 -9 -1 -13 -1.01 6.17
 -9 -1 -13 0.07 10.22
 -9 1 13 13.05 12.09
 -9 1 -13 4.19 11.37
 -9 -1 13 -2.59 12.96
 9 1 13 -2.59 5.42
 -9 -1 13 -1.89 3.8
 -9 -1 -14 5.78 13.28
 -9 1 14 8.82 14.47
 9 -1 14 8.17 24.24
 -9 -1 -14 10.44 11.66
 -9 1 -14 14.97 14.18
 9 1 14 7.9 10.67
 -9 -1 14 11.46 15.33
 -9 -1 14 9 4.59
 9 -1 15 3.83 14.16
 -9 -1 -15 11.79 10.85
 -9 -1 -15 -9.66 12.87
 -9 1 15 14.65 15.15
 -9 1 -15 7.45 22.3
 9 1 15 4.03 7
 -9 -1 15 3.33 6.62
 -9 -1 15 10.44 14.81
 9 -1 16 16.38 16.23
 -9 -1 -16 8.51 23.83
 -9 -1 -16 12.02 8.85
 -9 1 16 22.28 18.25
 -9 -1 16 12.96 8.44
 9 1 16 18.37 8.62
 -9 1 -16 21.47 25.03
 -9 -1 16 8.57 17.56
 9 -1 17 24.73 16.77
 -9 -1 -17 26.38 16.97
 -9 -1 -17 19.74 12.67
 -9 1 17 18.12 30.09
 -9 -1 17 -1.69 28.43
 9 1 17 9.63 14.18
 -9 -1 17 8.64 8.26
 -9 1 -17 18.66 26.51
 -9 -1 -18 36.33 19.06
 -9 -1 -18 27.84 10.17
 -9 1 18 28.52 19.45
 9 -1 18 23.61 28.45
 -9 -1 18 28.58 20.93
 -9 -1 18 13.08 6.53
 9 1 18 22.48 12.18
 -9 1 -18 23 18.97
 9 -1 19 86.47 24.51
 -9 1 19 68.49 27.84
 -9 -1 -19 57.41 26.94
 -9 1 -19 62.43 27.32
 9 1 19 92.79 18.16
 -9 -1 19 91.29 29.12
 9 -1 20 17.31 20.68
 -9 1 20 38.87 36.82
 -9 -1 -20 35.38 21.9
 9 1 20 20.12 22.21
 -9 1 -20 51.16 22.17
 -9 -1 20 19.78 24.08
 -9 1 21 106.82 33.26
 9 -1 21 108.3 27.62
 -9 -1 -21 92.52 30.81
 9 1 21 107.6 20.98
 -9 -1 21 94.78 53.84
 -9 1 -21 78.66 31.46
 -9 1 22 32.03 24.76
 9 -1 22 60.52 33.58
 -9 -1 -22 21.83 25.05
 -9 1 -22 8.06 25.39
 9 1 22 35.4 16.92
 -9 -1 22 21.11 27.35
 -9 1 23 18.64 22.42
 -9 -1 -23 9.27 22.01
 9 -1 23 1.8 31.49
 9 1 23 10.35 25.43
 -9 1 -23 13.73 23.9
 -9 -1 23 19.13 26.18
 -9 -1 -24 14.16 25.97
 -9 1 24 44.36 26.58
 9 -1 24 28.9 23.97
 9 1 24 23.43 31.26
 -9 1 -24 5.22 27.46
 -9 -1 24 43.93 29.69
 9 -1 25 20.05 25.54
 -9 -1 -25 4.32 41.28
 -9 1 25 33.78 27.41
 -9 1 -25 51.31 43.64
 -9 -1 25 35.56 46.84
 9 -1 26 3.51 21.85
 -9 -1 -26 6.3 22.78
 -9 1 26 21.49 36.19
 -9 1 -26 5 25.57
 -9 -1 26 -6.59 27.62
 9 -1 27 11.57 28.02
 -9 -1 -27 26.94 28
 -9 1 27 35.63 28.16
 -9 -1 27 6.5 33.4
 -9 1 -27 22.15 31.58
 -9 -1 -28 -3.8 24.87
 -9 1 28 20.57 25.34
 9 -1 28 -2.09 25.68
 -9 -1 28 -8.03 30
 -9 1 -28 17.31 27.8
 -9 1 29 -7.9 44.18
 -9 -1 -29 -1.15 27.62
 9 -1 29 8.01 28.74
 -9 -1 29 28.79 50.41
 -9 1 -29 29.91 31.06
 -9 1 30 -28.56 30.99
 9 -1 30 28.07 30.99
 -9 -1 -30 28.54 45.67
 -9 1 -30 13.66 31.53
 -9 -1 30 14.13 34.68
 -9 -1 -31 20.41 31.4
 9 -1 31 20.39 32.43
 -9 1 31 -0.61 31.8
 -9 -1 31 17.58 36.06
 -9 1 -31 -4.52 32.66
 9 -1 32 5.74 35.61
 -9 1 32 16.88 35.79
 -9 -1 -32 14.09 35.47
 -9 -1 32 20.62 40.38
 -9 1 -32 63.45 57.95
 -9 -1 -33 -2.86 31.76
 -9 1 33 5.67 33.38
 -9 1 -33 22.46 34.1
 -9 -1 33 -1.4 36.44
 -9 -1 -34 33.49 55.82
 -9 1 34 13.57 36.8
 -9 1 -34 1.73 38.8
 -9 -1 34 57.91 92.41
 10 -1 0 58.36 21.02
 -10 -1 0 59.44 14.47
 -10 1 0 55.66 8.6
 10 -1 0 53.18 8.71
 10 -1 1 8.35 9.75
 10 -1 1 2.16 6.55
 -10 1 1 9.27 5.58
 -10 -1 -1 8.57 7.16
 10 -1 -1 15.66 9.57
 10 -1 -1 9.43 8.48
 -10 1 -1 2.99 6.44
 -10 -1 1 12.06 6.53
 10 -1 2 17.31 11.07
 -10 1 2 8.89 5.47
 10 -1 2 21.81 11.97
 -10 -1 -2 18.86 9.25
 -10 -1 -2 16.41 8.26
 -10 1 -2 12.96 7.61
 10 -1 -2 36.84 16.54
 -10 -1 2 20.28 6.5
 10 -1 -2 10.35 5.31
 -10 -1 -3 12.33 7.83
 -10 -1 -3 5.76 11.57
 -10 1 3 1.26 4.05
 10 -1 3 -5.45 9.39
 10 -1 -3 1.49 9.52
 -10 1 -3 3.98 10.42
 10 -1 -3 -2.14 4.16
 -10 -1 3 11.34 8.44
 -10 -1 3 12.47 8.44
 -10 1 4 8.6 4.39
 -10 -1 -4 12.81 8.21
 10 -1 4 7.09 9.95
 -10 -1 -4 13.41 8.89
 10 -1 -4 5.87 11.12
 -10 1 -4 13.12 13.12
 10 -1 -4 3.58 3.85
 -10 -1 4 2.54 9.72
 10 1 4 3.04 7.09
 -10 -1 4 17.1 5.69
 10 -1 5 18.73 10.78
 -10 1 5 11.55 5.9
 -10 -1 -5 15.15 8.57
 -10 -1 -5 21.31 10.38
 -10 -1 5 20.19 16.86
 -10 1 -5 19.76 9.93
 -10 -1 5 19.13 8.96
 10 -1 -5 17.24 12.22
 10 -1 -5 9.81 5
 10 1 5 13.75 7.47
 10 -1 6 67.32 15.06
 -10 -1 -6 61.17 12.58
 -10 1 6 44.77 7.25
 -10 -1 -6 48.19 14.65
 -10 1 -6 57.37 13.57
 -10 -1 6 61.02 7.4
 10 1 6 60.95 9.27
 -10 -1 6 70.27 15.82
 10 -1 7 14.67 9.16
 -10 -1 -7 -18.19 14.02
 -10 -1 -7 -1.44 6.64
 10 1 7 0.14 8.17
 -10 -1 7 -1.01 6.19
 -10 1 -7 -1.01 8.53
 -10 -1 7 -7.67 10.06
 -10 -1 7 0.16 0.97
 -10 -1 -8 7.29 10.4
 10 -1 8 4.46 10.85
 -10 -1 -8 14.18 11.46
 -10 1 -8 2.09 10.6
 -10 -1 8 3.06 6.41
 10 1 8 5.74 5.92
 -10 -1 8 5.78 4.66
 -10 -1 8 -3.53 17.22
 10 -1 9 -4.68 10.71
 -10 -1 -9 2.07 7.74
 -10 -1 -9 -2.95 10.62
 10 1 9 4.75 5.99
 -10 -1 9 5.49 8.67
 -10 1 -9 13.1 10.87
 -10 -1 9 8.8 11.79
 -10 -1 9 2.25 6.86
 -10 -1 -10 -4.86 10.83
 10 -1 10 10.65 11.34
 -10 -1 -10 0.83 7.22
 -10 1 -10 5.99 11.75
 10 1 10 7.36 10.04
 -10 -1 10 1.55 4.14
 -10 -1 10 10.78 12.36
 10 -1 11 20.03 13.98
 -10 -1 -11 14.16 20.03
 -10 -1 -11 15.6 8.82
 -10 -1 11 16.92 5.83
 -10 -1 11 17.69 23.59
 -10 1 -11 21.25 14.52
 10 1 11 15.69 7.72
 -10 -1 -12 8.55 12.09
 -10 -1 -12 7.56 7.09
 10 -1 12 5.74 12.33
 -10 1 -12 -8.85 13.12
 10 1 12 1.87 6.39
 -10 -1 12 2.93 4.37
 -10 -1 12 16.41 14.2
 -10 1 13 10.2 15.01
 -10 -1 -13 11.41 8.15
 10 -1 13 16.68 14.31
 -10 -1 -13 2.79 13.05
 -10 -1 13 5.47 15.48
 10 1 13 12.63 10.71
 -10 1 -13 -5.65 14.81
 -10 -1 13 6.21 6.95
 -10 -1 -14 6.93 17.65
 10 -1 14 58.83 28.04
 -10 -1 -14 31.17 15.21
 -10 1 14 23.79 19.4
 10 1 14 32.48 9.68
 -10 -1 14 51.99 31.62
 -10 1 -14 34.3 19.15
 -10 -1 14 36.71 5.38
 10 -1 15 5.11 18.19
 -10 1 15 22.42 27.41
 -10 -1 -15 17.19 14.47
 -10 -1 -15 16.97 13.48
 10 1 15 10.06 8.01
 -10 1 -15 18.41 25.91
 -10 -1 15 24.98 17.47
 -10 -1 15 5.96 6.3
 10 -1 16 13.57 17.56
 -10 1 16 2.09 16.72
 -10 -1 -16 0.09 12.06
 -10 -1 -16 13.57 15.84
 -10 1 -16 -6.95 24.98
 -10 -1 16 3.24 6.39
 -10 -1 16 -4.68 16.18
 10 1 16 5.2 7.56
 10 -1 17 13.62 18.48
 -10 1 17 18.32 18.3
 -10 -1 -17 5.74 9.3
 -10 -1 -17 3.06 17.08
 -10 1 -17 5.85 26
 -10 -1 17 18.25 18.07
 10 1 17 1.26 8.57
 10 -1 18 26.99 28.47
 -10 -1 -18 13.37 18.43
 -10 1 18 11.14 19.27
 10 1 18 4.21 9.25
 -10 -1 18 32.86 30.45
 -10 1 -18 -1.37 18.32
 -10 -1 -19 15.71 20.44
 -10 1 19 9.95 21.81
 10 -1 19 16.86 20.05
 10 1 19 6.41 10.76
 -10 -1 19 40.53 22.19
 -10 1 -19 12.51 20.12
 -10 -1 -20 -1.94 33.69
 -10 1 20 11.66 22.71
 10 -1 20 29.44 20.44
 -10 -1 20 28.79 22.71
 10 1 20 9.77 11.3
 -10 1 -20 12.69 21.27
 10 -1 21 -5.09 18.82
 -10 1 21 18.12 21.58
 -10 -1 -21 -0.68 19.99
 10 1 21 6.48 16.88
 -10 1 -21 16.92 20.3
 -10 -1 21 1.22 21.99
 -10 -1 -22 -1.1 21.02
 -10 1 22 27.55 22.57
 10 -1 22 -16.7 29.57
 10 1 22 4.61 13.37
 -10 -1 22 15.08 37.11
 -10 1 -22 5.81 21.79
 10 -1 23 -2.36 32.66
 -10 -1 -23 20.66 23.16
 -10 1 23 25.05 24.26
 -10 -1 23 13.91 26.42
 -10 1 -23 14.11 23.63
 10 1 23 -0.7 14.9
 10 -1 24 11.52 20.03
 -10 1 24 8.55 22.8
 -10 -1 -24 -1.42 22.78
 -10 1 -24 8.26 24.06
 -10 -1 24 0.77 26.45
 -10 1 25 13.1 28.25
 -10 -1 -25 4.77 41.82
 10 -1 25 19.22 24.08
 -10 1 -25 21.2 44.36
 -10 -1 25 38.49 31.94
 10 -1 26 25.54 24.51
 -10 -1 -26 17.19 27.71
 -10 1 26 4.32 28.97
 -10 1 -26 39.18 47.15
 -10 -1 26 20.95 48.46
 -10 -1 -27 6.19 23.81
 -10 1 27 9.03 25.21
 10 -1 27 4.03 21
 -10 -1 27 -8.1 29.39
 -10 1 -27 -1.76 26.47
 10 -1 28 -3.69 21.25
 -10 1 28 4.07 24.51
 -10 -1 -28 -4.7 23.95
 -10 -1 28 17.83 28.58
 -10 1 -28 -11.79 25.59
 10 -1 29 -3.08 23.83
 -10 -1 -29 15.57 25.88
 -10 1 29 -14.79 26.74
 -10 -1 29 4.28 30.95
 -10 1 -29 11.39 29.19
 -10 -1 -30 17.53 48.39
 10 -1 30 6.35 27.84
 -10 1 30 16.95 50.89
 -10 1 -30 15.12 32.93
 -10 -1 30 -3.06 34.84
 -10 1 31 17.29 34.01
 -10 -1 -31 31.87 32.43
 -10 1 -31 -18.84 34.5
 -10 -1 31 -8.39 58.72
 -10 1 32 17.42 38.67
 -10 -1 -32 24.55 37.47
 -10 1 -32 70.6 61.15
 -10 -1 32 2.16 43.87
 -10 1 33 17.51 32.07
 -10 -1 -33 -0.88 31.91
 -10 1 -33 39.5 52.19
 -10 -1 33 -27.68 37.32
 11 -1 0 1.26 9.32
 -11 -1 0 -3.04 6.35
 -11 1 0 1.37 5.67
 11 -1 0 3.87 5.96
 11 -1 1 6.12 12.74
 -11 -1 -1 29.21 13.23
 11 -1 1 9.3 12.22
 -11 1 1 14.43 7.04
 11 -1 -1 9.72 10.33
 -11 1 -1 19.94 7.76
 11 -1 -1 28.18 11.66
 -11 -1 1 16.09 7.88
 11 -1 2 8.44 9.54
 -11 1 2 2.16 4.91
 -11 -1 -2 -5.63 7.81
 11 -1 -2 2.61 9.99
 -11 1 -2 6.08 6.71
 11 -1 -2 2.9 5.02
 -11 -1 2 -0.29 5.74
 -11 -1 2 0.81 1.04
 11 -1 3 5.11 10.33
 -11 -1 -3 4.79 8.85
 -11 1 3 3.94 4.79
 -11 -1 3 -2.25 9.72
 -11 1 -3 12.15 11.64
 -11 -1 3 11.97 8.8
 11 -1 -3 6.26 10.53
 11 -1 -3 1.76 4.59
 -11 -1 -4 -2.23 8.42
 11 -1 4 2.43 10.06
 -11 1 4 0.54 4.41
 -11 1 -4 1.85 12.69
 -11 -1 4 0.47 0.99
 -11 -1 4 2.86 9.3
 11 -1 -4 10.98 10.33
 11 1 4 6.37 8.12
 11 -1 -4 -0.11 3.8
 -11 -1 4 3.44 5.06
 11 -1 5 3.15 14.54
 -11 -1 -5 -1.69 8.94
 -11 1 5 0.63 3.6
 -11 1 -5 1.08 8.67
 11 -1 -5 0.25 3.13
 -11 -1 5 0.02 4.82
 11 -1 -5 1.37 10.56
 -11 -1 5 -1.22 9.61
 11 1 5 4.16 6.82
 -11 -1 -6 14.27 15.28
 11 -1 6 4.05 10.65
 -11 1 6 1.78 5.22
 -11 -1 -6 5.42 9.99
 -11 -1 6 4.43 8.15
 -11 -1 6 0.45 11.16
 11 1 6 5.04 11.3
 -11 1 -6 16.81 10.02
 -11 -1 -7 7.25 8.24
 11 -1 7 7.27 16.54
 -11 -1 -7 13.3 9.63
 -11 1 7 0.9 1.98
 -11 1 -7 6.77 10.26
 -11 -1 7 1.04 4.79
 -11 -1 7 -4.12 11.7
 11 1 7 5.6 6.77
 -11 -1 -8 15.98 11.32
 11 -1 8 11.73 12.15
 -11 -1 -8 7.88 8.91
 -11 -1 8 6.8 10.94
 -11 1 -8 8.42 11.79
 -11 -1 8 17.47 13.23
 -11 -1 8 -0.74 7.67
 11 1 8 7.72 11.07
 -11 -1 -9 15.3 9.84
 -11 -1 -9 22.89 13.19
 11 -1 9 25.34 20.23
 -11 1 -9 11.93 13.57
 -11 -1 9 19 15.17
 -11 -1 9 11.57 5.22
 -11 -1 9 11.46 7.45
 11 1 9 19.65 7.85
 -11 -1 -10 -4.32 12.92
 -11 -1 -10 -8.85 18.1
 11 -1 10 8.76 11.57
 -11 -1 10 2.63 3.89
 -11 1 -10 13.26 11.97
 -11 -1 10 -0.56 12.83
 -11 -1 10 0.97 4.93
 11 1 10 -0.05 10.47
 -11 -1 -11 4.5 13.12
 -11 -1 -11 -0.74 13.82
 11 -1 11 7.67 13.59
 -11 -1 11 14.18 8.21
 -11 -1 11 16.99 14.81
 11 1 11 7.94 7.31
 -11 1 -11 11.66 14.22
 -11 -1 11 5.92 6.71
 -11 -1 -12 -0.79 12.76
 -11 -1 -12 15.08 13.03
 11 -1 12 10.92 12.92
 -11 1 -12 -2.39 13.86
 -11 -1 12 -2.63 14.85
 -11 -1 12 -1.91 6.93
 11 1 12 2.75 7.63
 -11 -1 12 4.95 3.83
 -11 1 13 12.02 15.12
 -11 -1 -13 2.21 13.53
 -11 -1 -13 13.26 12.85
 11 -1 13 10.58 13.84
 -11 -1 13 2.54 16.02
 -11 -1 13 8.06 5.87
 -11 1 -13 -3.24 14.7
 -11 -1 13 1.15 3.94
 11 1 13 -6.62 12.13
 -11 1 14 -0.61 16.95
 11 -1 14 -4.79 23.05
 -11 -1 -14 17.06 12.65
 -11 -1 -14 10.49 14.61
 11 1 14 4.12 7.7
 -11 1 -14 23.09 15.57
 -11 -1 14 18.64 17.06
 -11 -1 14 3.08 3.6
 -11 -1 -15 1.31 14.31
 11 -1 15 -0.34 16.77
 -11 1 15 -2.75 27.62
 -11 -1 -15 38.33 26.06
 -11 1 -15 16.59 26.4
 11 1 15 15.3 12.94
 -11 -1 15 31.22 28.52
 -11 -1 15 4.88 6.05
 11 -1 16 20.37 17.87
 -11 1 16 0.14 20.08
 -11 -1 -16 35.92 17.96
 11 1 16 3.22 9.3
 -11 1 -16 -9.14 27.08
 -11 -1 16 9.72 18.86
 11 -1 17 15.37 18.86
 -11 1 17 1.8 21.22
 -11 -1 -17 25.66 18.82
 -11 1 -17 14.18 19.13
 11 1 17 3.87 15.62
 -11 -1 17 11.34 20.01
 11 -1 18 10.24 30.29
 -11 1 18 -5.27 27.71
 -11 -1 -18 -2.36 17.6
 11 1 18 2.23 8.91
 -11 1 -18 -4.37 17.22
 -11 -1 18 -15.98 17.92
 11 -1 19 18.19 21.56
 -11 -1 -19 -1.08 19.15
 -11 1 19 11.59 19.45
 -11 1 -19 12.56 18.97
 -11 -1 19 9.48 32.5
 11 1 19 -0.72 9.77
 11 -1 20 1.06 23
 -11 1 20 2.79 20.98
 -11 -1 -20 11.57 20.05
 11 1 20 0.88 10.71
 -11 -1 20 16.34 22.21
 -11 1 -20 13.28 20.35
 11 -1 21 4.61 22.82
 -11 -1 -21 18.19 20.8
 -11 1 21 -23.79 34.95
 11 1 21 0.61 10.76
 -11 -1 21 12.99 23.02
 -11 1 -21 8.17 21.2
 11 -1 22 18.21 41.73
 -11 -1 -22 21.54 24.78
 -11 1 22 30.16 27.46
 -11 -1 22 30.07 27.48
 -11 1 -22 -9.52 25.23
 -11 1 23 10.83 23.34
 11 -1 23 -10.04 32.16
 -11 -1 -23 -1.33 20.35
 -11 1 -23 -0.29 21.52
 -11 -1 23 8.06 38.69
 11 -1 24 -18.73 22.51
 -11 1 24 35.2 39.41
 -11 -1 -24 26.24 36.73
 -11 1 -24 22.91 24.98
 -11 -1 24 1.08 29.28
 -11 -1 -25 27.37 26.99
 11 -1 25 18.52 24.62
 -11 1 25 1.62 28.49
 -11 1 -25 8.35 43.82
 -11 -1 25 -0.45 30.77
 11 -1 26 -0.05 23.65
 -11 1 26 14.22 28.36
 -11 -1 -26 11.84 27.8
 -11 -1 26 16.61 32.14
 -11 1 -26 16.74 45.73
 -11 -1 -27 7.88 28.16
 -11 1 27 29.84 44.68
 11 -1 27 4.32 23.86
 -11 -1 27 54.94 50.39
 -11 1 -27 -9.34 30.79
 11 -1 28 9.57 22.91
 -11 -1 -28 5.27 27.53
 -11 1 28 7.16 29.19
 -11 -1 28 19.94 33.33
 -11 1 -28 -14.54 31.08
 -11 1 29 24.22 30.88
 -11 -1 -29 14.72 45.62
 11 -1 29 -15.26 24.17
 -11 1 -29 8.64 32.81
 -11 -1 29 27.77 35.29
 -11 -1 -30 7.67 34.21
 -11 1 30 15.71 34.03
 -11 -1 30 4.68 39.27
 -11 1 -30 21.83 36.3
 -11 1 31 23.38 54.35
 -11 -1 -31 30.23 33.31
 -11 -1 31 0.97 36.89
 -11 1 -31 -17.85 34.75
 -11 -1 -32 4.55 36.21
 -11 1 32 10.87 38.06
 -11 1 -32 18.07 58.52
 -11 -1 32 48.79 66.28
 -12 1 0 17.38 12.24
 12 -1 0 14.4 8.71
 -12 -1 0 14 9.41
 12 -1 0 11.84 12.47
 -12 1 1 11.55 7.09
 12 -1 1 8.85 11.32
 -12 -1 -1 -0.81 9.21
 12 -1 -1 13.86 7.13
 -12 -1 1 5.2 12.36
 -12 1 -1 -0.47 7.79
 12 -1 -1 10.56 12.33
 -12 -1 -2 6.53 9.75
 -12 1 2 5.36 6.46
 12 -1 2 12.02 11.93
 12 -1 -2 10.67 6.5
 -12 -1 2 11.16 11.21
 -12 1 -2 1.42 8.42
 12 -1 -2 4.93 12.18
 -12 -1 -3 5.83 14.47
 -12 1 3 -1.4 5.38
 12 -1 3 10.29 10.76
 12 -1 -3 -7.02 8.28
 -12 -1 3 3.89 10.51
 -12 -1 3 4.52 6.23
 -12 1 -3 6.48 8.35
 12 -1 -3 6.62 11.52
 -12 -1 -4 -1.96 14.18
 12 -1 4 -1.35 18.05
 -12 1 4 -2.68 8.24
 12 -1 -4 7.7 7.38
 -12 -1 4 -2.07 6.03
 -12 1 -4 13.26 13.71
 -12 -1 4 6.84 10.8
 12 -1 -4 8.64 11.93
 -12 -1 -5 14.61 10.31
 -12 1 5 6.98 7.61
 12 -1 5 0.14 12.51
 -12 -1 5 26.24 11.97
 12 -1 -5 0.32 15.17
 12 1 5 0.61 8.78
 -12 -1 5 5.38 6.05
 -12 1 -5 -4.25 16.43
 -12 -1 -6 6.28 10.85
 -12 1 6 0.97 6.03
 12 -1 6 26.49 19.11
 -12 -1 6 5.33 8.73
 -12 1 -6 -9.07 17.74
 -12 -1 6 23.52 13.12
 12 1 6 11.16 8.73
 -12 1 7 2.05 2.43
 12 -1 7 -1.85 11.66
 -12 -1 -7 17.19 10.74
 -12 1 -7 -1.76 11.5
 -12 -1 7 10.33 13.3
 -12 -1 7 7.94 7.79
 12 1 7 7.07 12.51
 12 -1 8 -0.47 11.39
 -12 -1 -8 10.49 17.22
 -12 1 -8 -5.65 11.84
 12 1 8 -0.47 7.67
 -12 -1 8 2.93 4.52
 -12 -1 8 17.22 13.41
 -12 -1 8 -0.63 6.89
 12 -1 9 7.45 13.53
 -12 -1 -9 5.99 12.33
 -12 -1 9 5.29 11.03
 12 1 9 16.77 13.05
 -12 1 -9 10.04 13.57
 -12 -1 9 4.23 4.73
 -12 -1 9 21.88 22.1
 12 -1 10 6.66 14.65
 -12 -1 -10 16.32 14
 -12 -1 10 5.49 16.41
 -12 1 -10 16.32 15.35
 -12 -1 10 15.17 10.53
 12 1 10 10.76 8.94
 -12 -1 10 13.77 7.18
 -12 -1 -11 1.42 12.36
 12 -1 11 13.19 19.38
 -12 1 -11 9.03 13.48
 -12 -1 11 1.06 5.31
 -12 -1 11 4.84 14.38
 12 1 11 7.54 11.23
 -12 -1 11 -4.03 5.74
 12 -1 12 0.36 12.45
 -12 -1 -12 -3.38 12.51
 12 1 12 4.55 7.54
 -12 -1 12 8.69 22.53
 -12 -1 12 1.08 3.15
 -12 1 -12 10.71 13.48
 -12 -1 12 -3.98 4.1
 -12 -1 -13 11.68 14.7
 -12 1 13 -1.31 16.68
 12 -1 13 28.2 14.83
 -12 1 -13 26.56 24.71
 12 1 13 11.28 13.14
 -12 -1 13 2.21 3.33
 -12 -1 13 -2.5 17.24
 12 -1 14 25.66 23.81
 -12 1 14 4.97 17.31
 -12 -1 -14 7.65 25.81
 -12 1 -14 13.91 26.27
 12 1 14 7.02 9.03
 -12 -1 14 1.55 4.32
 -12 -1 14 1.6 18.14
 12 -1 15 24.55 19.42
 -12 -1 -15 -0.74 19.58
 -12 1 15 57.48 32.9
 -12 -1 15 39.23 22.42
 12 1 15 10.17 16.61
 -12 1 -15 17.49 30.47
 12 -1 16 34.41 18.66
 -12 -1 -16 0.72 18.88
 -12 1 16 8.1 21.09
 12 1 16 5.11 9.81
 -12 -1 16 29.8 31.87
 -12 1 -16 10.92 18.75
 12 -1 17 45.44 30.52
 -12 1 17 32.66 21.9
 -12 -1 -17 18.16 20.21
 12 1 17 -2.54 10.26
 -12 -1 17 6.01 21.29
 -12 1 -17 15.69 19.22
 -12 -1 -18 6.46 20.1
 12 -1 18 18.5 19.85
 -12 1 18 4.32 35.2
 12 1 18 2.54 16.34
 -12 1 -18 -0.65 20.32
 -12 -1 18 9.34 21.92
 -12 -1 -19 26.06 31.89
 12 -1 19 5.42 20.86
 -12 1 19 -0.63 21.47
 12 1 19 1.67 10.74
 -12 -1 19 20.3 22.33
 -12 1 -19 1.62 20.23
 -12 -1 -20 -2.95 20.41
 -12 1 20 -8.6 21.63
 12 -1 20 16.81 21.04
 -12 1 -20 13.12 20.1
 -12 -1 20 -8.98 22.12
 12 -1 21 15.28 23.38
 -12 1 21 -16.5 38.87
 -12 -1 -21 10.56 23.02
 -12 1 -21 9.14 23.36
 -12 -1 21 10.51 25.66
 -12 -1 -22 -21.7 24.28
 -12 1 22 -5.2 26.06
 -12 1 -22 -16.27 24.58
 -12 -1 22 12.99 27.21
 -12 -1 -23 12.29 25.77
 -12 1 23 15.15 28.16
 12 -1 23 13.37 30
 -12 1 -23 3.6 27.12
 -12 -1 23 7.94 28.83
 -12 1 24 -1.28 26.96
 -12 -1 -24 45.31 37.5
 12 -1 24 -1.35 27.37
 -12 1 -24 -3.53 25.66
 -12 -1 24 -5.11 45.31
 12 -1 25 5 27.75
 -12 -1 -25 9.5 25.72
 -12 1 25 -4.55 27.53
 -12 -1 25 20.73 30.61
 -12 1 -25 -17.33 40.83
 -12 -1 -26 -2.14 25.03
 12 -1 26 -10.29 26.33
 -12 1 26 -11.91 27.3
 -12 -1 26 18.57 29.87
 -12 1 -26 2 27.68
 -12 1 27 28.36 32
 12 -1 27 5.92 28.81
 -12 -1 -27 2.75 29.82
 -12 1 -27 31.96 31.89
 -12 -1 27 -21.99 35.99
 -12 1 28 0.41 53.81
 -12 -1 -28 23.2 32.39
 -12 -1 28 4.05 58.74
 -12 1 -28 17.44 35.97
 -12 1 29 17.33 35.13
 -12 -1 -29 -0.59 51.63
 -12 -1 29 23.2 39.36
 -12 1 -29 8.08 35.49
 -12 -1 -30 2.18 33.8
 -12 1 30 19.78 34.01
 -12 1 -30 15.03 35.29
 -12 -1 30 -8.03 38.73
 -12 -1 -31 17.56 33.69
 -12 1 31 23.43 52.98
 -12 -1 31 8.94 38.42
 -12 1 -31 -14.65 35.67
 -13 1 0 -10.15 12.58
 -13 -1 0 -0.25 13.59
 13 -1 0 0.59 12.31
 13 -1 1 4.52 12.27
 -13 1 1 2.54 7.79
 -13 -1 -1 -1.85 13.8
 -13 1 -1 -0.45 8.44
 13 -1 -1 17.29 12.54
 13 -1 -1 6.39 7.76
 -13 -1 1 7.49 8.67
 13 -1 2 52.08 15.26
 -13 1 2 26.18 13.77
 -13 -1 -2 32.48 12.2
 -13 -1 2 14.16 10.6
 13 -1 -2 18.7 14.04
 -13 1 -2 31.33 11.75
 13 -1 -2 51.99 24.91
 -13 -1 -3 12.49 11.23
 -13 1 3 7.7 7.43
 13 -1 3 25.39 22.26
 13 -1 -3 13.66 11.05
 -13 -1 3 21.2 9.23
 -13 1 -3 20.41 11.03
 -13 -1 3 15.3 13.93
 13 -1 -3 25.52 15.17
 -13 -1 -4 4.05 10.98
 -13 1 4 9.43 10.11
 13 -1 4 5.47 13.68
 -13 1 -4 12.56 10.38
 -13 -1 4 20.01 13.23
 -13 -1 4 6.1 7.85
 13 -1 -4 7.97 14.76
 13 -1 5 6.75 13.23
 -13 -1 -5 7.85 11.43
 -13 1 5 2.48 8.71
 -13 1 -5 21.13 11.3
 -13 -1 5 -3.85 13.5
 -13 -1 5 8.69 11.05
 -13 -1 -6 30.25 19.31
 13 -1 6 27.5 14.38
 -13 1 6 7.49 4.93
 -13 1 -6 0.5 19.31
 13 1 6 14.88 10.74
 -13 -1 6 10.24 15.51
 -13 -1 -7 12.6 17.56
 13 -1 7 6.08 13.1
 -13 1 7 -2.32 5.18
 13 1 7 3.38 9.45
 -13 -1 7 8.08 8.62
 -13 -1 7 19.72 14.18
 -13 1 -7 17.35 19.54
 -13 -1 -8 8.55 12.63
 13 -1 8 17.19 20.46
 -13 1 -8 27.03 21.56
 -13 -1 8 0.18 8.17
 -13 -1 8 3.24 8.44
 13 1 8 11.52 15.1
 -13 -1 8 10.78 15.8
 13 -1 9 20.91 14.22
 -13 -1 -9 8.28 13.53
 -13 1 -9 16.23 23.11
 -13 -1 9 11.28 12.02
 13 1 9 5.99 9.59
 -13 -1 9 28.43 24.73
 -13 -1 9 0.36 7.76
 13 -1 10 -0.63 12.42
 -13 -1 -10 8.15 12.33
 -13 -1 10 -4.03 14.52
 -13 -1 10 -0.59 4.07
 13 1 10 2.45 8.48
 -13 1 -10 14.11 21.31
 -13 -1 -11 36.48 19.63
 13 -1 11 99.93 21.09
 -13 -1 11 29.53 6.26
 13 1 11 76.45 12.87
 -13 1 -11 28.9 33.58
 -13 -1 11 66.42 24.13
 -13 -1 -12 25.61 31.6
 13 -1 12 56.85 21.52
 -13 -1 12 42.69 24.04
 13 1 12 42.6 12.58
 -13 1 -12 36.89 34.86
 -13 -1 -13 29.71 18.05
 -13 1 13 17.56 19.31
 13 -1 13 18.28 17.35
 -13 -1 13 36.48 19.94
 -13 -1 13 5.67 5.15
 13 1 13 10.33 16.38
 -13 1 -13 20.39 27.17
 -13 1 14 58.49 25.25
 13 -1 14 57.01 22.6
 -13 -1 -14 33.76 25
 -13 -1 14 53.23 26.54
 13 1 14 41.59 13.62
 -13 1 -14 35.7 35.56
 13 -1 15 16.54 18.66
 -13 -1 -15 14.67 20.01
 -13 1 15 37.92 32.68
 13 1 15 -5.96 16.81
 -13 1 -15 19.94 19.42
 -13 -1 15 5 22.03
 13 -1 16 20.08 19.15
 -13 -1 -16 32.14 20.95
 -13 1 16 -9.3 23.36
 -13 -1 16 44.25 35.13
 13 1 16 2.66 11.46
 -13 1 -16 6.91 20.48
 -13 -1 -17 -1.71 18.84
 13 -1 17 5.65 27.57
 -13 1 17 12.76 20.82
 -13 -1 17 -5.06 19.24
 -13 1 -17 11.37 18.64
 13 1 17 -8.71 10.31
 -13 1 18 51.54 38.37
 13 -1 18 9.18 21.02
 -13 -1 -18 17.74 33.76
 -13 -1 18 -2.5 22.62
 -13 1 -18 3.15 21.79
 -13 -1 -19 5.9 21.18
 -13 1 19 -4.64 24.13
 13 -1 19 2.27 21.45
 -13 -1 19 33.8 23.86
 -13 1 -19 -3.98 21.54
 13 -1 20 13.89 22.15
 -13 1 20 3.87 23.97
 -13 -1 -20 0.34 21.85
 -13 1 -20 -3.69 21.79
 -13 -1 20 3.69 36.62
 -13 1 21 1.53 26.96
 -13 -1 -21 17.87 24.8
 13 -1 21 4.19 38.78
 -13 -1 21 19.76 27.5
 -13 1 -21 4.25 25.34
 -13 -1 -22 -15.87 23.41
 13 -1 22 25.77 37.68
 -13 1 22 -17.24 25.57
 -13 -1 22 17.58 25.52
 -13 1 -22 -6.8 23.7
 -13 -1 -23 11.93 44.27
 13 -1 23 14.97 30.65
 -13 1 23 22.55 31.89
 -13 -1 23 21.27 32.34
 -13 1 -23 15.96 29.75
 13 -1 24 4.25 28.67
 -13 1 24 1.28 30.86
 -13 -1 -24 18.25 28.02
 -13 -1 24 -18.91 48.97
 -13 1 -24 44.45 43.46
 -13 1 25 -11.43 42.99
 13 -1 25 -4.84 27.71
 -13 -1 -25 -4.1 26.51
 -13 -1 25 14.13 31.08
 -13 1 -25 -18.68 43.64
 -13 1 26 -11.1 28.13
 13 -1 26 6.73 26.2
 -13 -1 -26 -3.69 26.42
 -13 1 -26 -9.7 28.72
 -13 -1 26 26.13 30.16
 -13 1 27 -7.79 33.02
 -13 -1 -27 16.07 30.23
 -13 -1 27 -6.95 36.42
 -13 1 -27 23.07 32.68
 -13 -1 -28 -2.54 34.23
 -13 1 28 24.28 57.91
 -13 -1 28 20.05 40.58
 -13 1 -28 38.37 38.17
 -13 1 29 -7.29 32.48
 -13 -1 -29 -15.35 49.31
 -13 1 -29 9.7 33.2
 -13 -1 29 37.5 57.03
 -13 1 30 0.27 34.8
 -13 -1 -30 -0.63 33.4
 -13 -1 30 11.14 38.55
 -13 1 -30 8.44 34.46
 -14 1 0 8.24 9.41
 14 -1 0 9.32 14.18
 -14 -1 0 -0.07 9.7
 14 -1 1 187.82 26.47
 -14 -1 -1 148.07 20.35
 -14 1 1 115.71 18.14
 -14 -1 1 141.34 18.82
 -14 1 -1 110.08 28.58
 14 -1 -1 188.24 40.35
 14 -1 2 45.51 15.66
 -14 1 2 14.58 14.67
 -14 -1 -2 30.25 12.49
 -14 -1 2 22.42 10.35
 14 -1 -2 25.07 17.74
 -14 1 -2 21.22 12.33
 14 -1 -2 9.66 9.59
 14 -1 3 4.14 14.04
 -14 1 3 9.57 7.65
 -14 -1 -3 2.93 17.31
 -14 -1 3 10.17 8.51
 -14 1 -3 9.05 11.25
 14 -1 -3 17.78 14.94
 -14 -1 3 17.49 14.18
 14 -1 -3 1.17 7.72
 -14 1 4 6.91 7.97
 -14 -1 -4 24.73 19.22
 14 -1 4 19.4 23.16
 -14 -1 4 14.85 13.01
 14 -1 -4 21.2 19.96
 -14 1 -4 20.35 12.69
 -14 -1 4 24.94 15.66
 -14 1 5 1.53 10.22
 -14 -1 -5 20.21 12.85
 14 -1 5 10.26 15.3
 -14 1 -5 11.03 13.19
 -14 -1 5 3.87 15.71
 -14 -1 5 22.98 12.13
 14 -1 6 11.55 14.94
 -14 -1 -6 10.56 12.94
 -14 1 6 9.18 5.45
 -14 1 -6 4.32 13.3
 -14 -1 6 6.62 11.34
 -14 -1 6 12.02 16.65
 14 -1 7 36.03 26.65
 -14 -1 -7 21.29 14.79
 -14 1 -7 19.04 15.28
 14 1 7 16.11 12.81
 -14 -1 7 14.7 11.66
 -14 -1 7 10.83 18.77
 -14 -1 -8 6.82 14.2
 14 -1 8 45.58 16.27
 -14 -1 8 12.13 10.08
 -14 -1 8 -4.91 18.16
 -14 1 -8 7.4 15.24
 14 1 8 5.38 11.75
 -14 -1 -9 7.18 16.99
 14 -1 9 35 18.82
 -14 -1 9 51.77 32.61
 -14 1 -9 26.76 17.89
 14 1 9 29.12 13.03
 -14 -1 9 20.66 10.53
 14 -1 10 62.64 30.59
 -14 -1 -10 33.85 30.72
 -14 1 -10 46.9 32.05
 -14 -1 10 53.05 24.08
 -14 -1 10 35.34 10.44
 14 1 10 55.39 14.49
 14 -1 11 20.41 15.98
 -14 -1 -11 12.83 17.51
 -14 -1 11 1.67 7.13
 14 1 11 12.18 10.78
 -14 -1 11 14.36 18.48
 -14 1 -11 5.24 16.38
 -14 -1 -12 33.31 21.34
 14 -1 12 29.17 19.09
 -14 -1 12 20.14 22.64
 -14 1 -12 22.01 20.5
 14 1 12 22.3 19.9
 -14 1 13 87.69 31.08
 14 -1 13 107.74 42.2
 -14 -1 -13 94.23 29.35
 -14 1 -13 74.74 28.45
 14 1 13 84.33 17.29
 -14 -1 13 113.91 49.94
 -14 1 14 2.36 22.46
 -14 -1 -14 27.86 21.22
 14 -1 14 25.54 19.38
 -14 -1 14 13.75 23.25
 14 1 14 5.11 11.46
 -14 1 -14 22.51 19.94
 14 -1 15 21.13 19.78
 -14 -1 -15 8.12 21.52
 -14 1 15 19.56 34.98
 -14 1 -15 5.11 21.11
 14 1 15 7.43 17.04
 -14 -1 15 13.93 23.97
 -14 -1 -16 0.09 37.09
 14 -1 16 7.4 33.67
 -14 1 16 18.86 26.74
 -14 -1 16 37.14 26.4
 -14 1 -16 13.03 22.39
 14 1 16 16.74 12.67
 -14 1 17 18.5 26.72
 14 -1 17 21.97 23.34
 -14 -1 -17 8.69 25.05
 -14 -1 17 36.46 26.58
 -14 1 -17 17.13 24.89
 14 -1 18 6.21 22.87
 -14 1 18 12.49 27.86
 -14 -1 -18 29.42 24.37
 -14 -1 18 21.58 26.56
 -14 1 -18 9.27 24.51
 14 -1 19 10.6 21.79
 -14 -1 -19 12.29 23.41
 -14 1 19 9.52 25.18
 -14 -1 19 2.59 25.5
 -14 1 -19 -2.9 23.45
 14 -1 20 2.23 24.17
 -14 -1 -20 9.77 25.07
 -14 1 20 25.25 27.05
 -14 -1 20 9.32 27.73
 -14 1 -20 8.46 25.34
 14 -1 21 25.14 34.62
 -14 -1 -21 2.61 22.93
 -14 1 21 9.63 25.12
 -14 -1 21 14.7 39.43
 -14 1 -21 -23.14 23.83
 -14 1 22 -8.69 26.51
 14 -1 22 18.61 23.74
 -14 -1 -22 -16.32 37.97
 -14 -1 22 0.5 26.65
 -14 1 -22 2.41 24.44
 -14 -1 -23 20.77 27.03
 -14 1 23 1.33 28.97
 14 -1 23 -11.55 26.36
 -14 -1 23 -2.12 29.46
 -14 1 -23 39.32 42.96
 -14 -1 -24 2.45 30.2
 -14 1 24 19.31 33.78
 14 -1 24 -2.32 30.29
 -14 -1 24 36.06 32.61
 -14 1 -24 22.64 50.73
 -14 1 25 43.93 54.4
 -14 -1 -25 6.95 31.4
 -14 -1 25 50.75 56.51
 -14 1 -25 -2.57 33.8
 -14 -1 -26 7.18 29.71
 -14 1 26 -5.02 30.7
 -14 1 -26 -26.45 31.71
 -14 -1 26 5.18 34.19
 -14 1 27 8.1 33.8
 -14 -1 -27 -6.86 31.6
 -14 1 -27 -2.93 34.91
 -14 -1 27 37.52 36.62
 -14 -1 -28 34.55 56.81
 -14 1 28 35.4 37.79
 -14 1 -28 2.25 38.1
 -14 -1 28 -5.74 40.04
 -14 -1 -29 21.65 40.83
 -14 1 29 27.35 41.59
 -14 -1 29 28.9 69.55
 -14 1 -29 23.99 41.52
 -15 -1 0 -0.45 15.15
 -15 1 0 5.65 9.97
 15 -1 0 0.09 23
 15 -1 1 44.83 21.18
 -15 -1 -1 59.35 14.92
 -15 1 1 45.06 13.66
 15 -1 -1 69.86 22.64
 -15 1 -1 48.28 16
 -15 -1 1 52.94 20.44
 15 -1 2 -6.59 15.15
 -15 1 2 9.88 8.71
 -15 -1 -2 3.08 10.83
 15 -1 -2 -15.21 16.05
 -15 -1 2 7.31 14.18
 -15 1 -2 25.88 17.62
 -15 -1 2 6.82 22.53
 -15 1 3 38.06 11.46
 -15 -1 -3 57.44 16.77
 15 -1 3 54.26 31.85
 15 -1 -3 49.22 27.05
 -15 1 -3 70.33 17.15
 -15 -1 3 73.08 21.65
 -15 -1 3 75.24 19.06
 -15 -1 -4 9.07 12.47
 -15 1 4 8.01 8.08
 15 -1 4 1.19 15.35
 -15 -1 4 13.01 16.16
 -15 1 -4 12.15 13.01
 -15 -1 4 5.6 12.96
 -15 1 5 4.73 6.59
 -15 -1 -5 -0.97 12.65
 15 -1 5 10.51 14.74
 -15 1 -5 6.19 13.35
 -15 -1 5 9.09 11.75
 -15 -1 5 11.19 24.46
 -15 1 6 0.9 5.83
 15 -1 6 9.61 14.45
 -15 -1 -6 -3.4 12.72
 -15 -1 6 0.52 10.51
 -15 -1 6 11.57 16.61
 -15 1 -6 14.56 13.23
 15 -1 7 -7.76 14.54
 -15 -1 -7 10.11 12.92
 -15 1 -7 2.93 13.71
 -15 -1 7 -12.72 16.59
 -15 -1 7 5.2 9.07
 -15 -1 -8 10.8 24.76
 15 -1 8 1.01 16.11
 -15 -1 8 15.73 19.18
 15 1 8 17.08 12.15
 -15 1 -8 6.03 15.64
 -15 -1 8 1.71 9.57
 15 -1 9 -2.52 17.35
 -15 -1 -9 26.11 16.79
 15 1 9 7.4 12.27
 -15 -1 9 4.46 9.3
 -15 -1 9 33.67 30.5
 -15 1 -9 -2.48 16.27
 15 -1 10 15.42 17.35
 -15 -1 -10 5.78 17.58
 -15 -1 10 0.11 19.58
 -15 1 -10 9.52 17.17
 15 1 10 6.19 12.29
 15 -1 11 32.57 20.59
 -15 -1 -11 15.96 21.4
 -15 1 -11 0.88 20.62
 -15 -1 11 28.88 23.02
 15 1 11 34.84 21.65
 15 -1 12 12.72 26.42
 -15 -1 -12 15.66 19
 -15 1 12 -25.34 32.14
 15 1 12 3.2 12.04
 -15 1 -12 -0.38 18.34
 -15 -1 12 26.13 21.22
 -15 -1 -13 10.71 22.42
 15 -1 13 5.54 19.87
 -15 1 13 22.26 23.52
 15 1 13 21.97 13.08
 -15 1 -13 6.66 21.65
 -15 -1 13 41.64 38.58
 15 -1 14 28.47 21.2
 -15 -1 -14 15.98 24.26
 -15 1 14 30.05 25.93
 15 1 14 5.2 21.58
 -15 -1 14 59.84 27.08
 -15 1 -14 10.26 23.23
 -15 1 15 18.73 35.02
 -15 -1 -15 2.66 31.71
 15 -1 15 -13.03 18.23
 -15 -1 15 28.88 23.52
 -15 1 -15 5.96 20.55
 -15 -1 -16 0.74 20.5
 15 -1 16 30.14 29.26
 -15 1 16 -13.17 23.9
 -15 -1 16 -3.89 23.59
 -15 1 -16 9.88 21.09
 -15 -1 -17 -0.92 20.68
 15 -1 17 -3.92 19.38
 -15 1 17 -0.18 23.95
 -15 -1 17 7.27 35.83
 -15 1 -17 -6.53 21.61
 -15 1 18 -2.7 24.06
 15 -1 18 6.46 19.24
 -15 -1 -18 -1.96 21.11
 -15 1 -18 2.34 21.34
 -15 -1 18 0.11 23.11
 15 -1 19 -14.09 23.18
 -15 1 19 25.32 27.68
 -15 -1 -19 9.48 25.75
 -15 -1 19 -1.8 26.99
 -15 1 -19 32.36 25.95
 -15 -1 -20 30.9 26.58
 -15 1 20 -14.16 28.83
 15 -1 20 25.91 37.23
 -15 -1 20 1.96 28.63
 -15 1 -20 4.07 27.05
 -15 -1 -21 29.19 44.79
 15 -1 21 20.41 25.79
 -15 1 21 9.3 31.49
 -15 -1 21 -9.72 48.03
 -15 1 -21 13.95 30.05
 15 -1 22 3.33 25.84
 -15 1 22 35.09 50.1
 -15 -1 -22 -3.22 29.26
 -15 -1 22 28.49 32.41
 -15 1 -22 29.1 46.95
 -15 -1 -23 2.05 30.7
 -15 1 23 38.67 34.3
 -15 1 -23 13.21 50.86
 -15 -1 23 2.77 34.05
 -15 -1 -24 21.61 30.99
 -15 1 24 -2.57 33.69
 -15 -1 24 -2.5 34.14
 -15 1 -24 21 33.31
 -15 -1 -25 26.76 32.99
 -15 1 25 6.3 55.73
 -15 -1 25 5.54 54.94
 -15 1 -25 0.99 34.84
 -15 -1 -26 -8.82 31.01
 -15 1 26 16.86 32.61
 -15 1 -26 16.77 32.54
 -15 -1 26 -4.14 35.54
 -15 -1 -27 25.59 52.69
 -15 1 27 22.89 35.2
 -15 -1 27 -16.07 39.12
 -15 1 -27 9.9 36.35
 -16 -1 0 2 9.72
 -16 1 0 -0.02 10.33
 16 -1 0 -0.11 15.82
 16 -1 1 5.76 27.39
 -16 -1 -1 2.09 11.64
 -16 1 1 7.2 16.7
 16 -1 -1 3.42 18.28
 -16 1 -1 13.44 12.45
 -16 -1 1 9.81 10.26
 -16 -1 -2 8.64 11.52
 -16 1 2 0.59 9.45
 16 -1 2 12.24 16.52
 -16 -1 2 7.22 15.73
 -16 -1 2 5.42 9.36
 -16 1 -2 1.35 12.63
 16 -1 -2 -4.23 17.35
 16 -1 3 19.49 17.98
 -16 -1 -3 19.94 20.71
 -16 1 3 13.66 15.73
 -16 -1 3 5.69 9.7
 -16 1 -3 8.08 22.46
 -16 -1 3 6.98 17.08
 -16 -1 -4 10.76 18.68
 -16 1 4 1.91 8.46
 16 -1 4 31.31 24.51
 -16 1 -4 2.97 20.5
 -16 -1 4 -2.5 8.06
 -16 -1 4 0.65 15.98
 16 -1 5 12.47 15.64
 -16 -1 -5 13.32 21.7
 -16 -1 5 2.95 7.63
 -16 -1 5 -5.15 26.06
 -16 1 -5 -5.22 14.16
 -16 -1 -6 9.99 13.39
 16 -1 6 -18.95 14.34
 -16 1 -6 8.46 13.55
 -16 -1 6 0.05 6.57
 -16 -1 6 1.22 16.61
 -16 -1 -7 -0.52 14.4
 16 -1 7 -8.98 23.5
 -16 -1 7 1.51 10.87
 -16 -1 7 0.63 18.01
 -16 1 -7 -6.03 14.85
 -16 -1 -8 -5.31 16.59
 16 -1 8 -9.16 17.1
 -16 1 -8 -6.73 16.45
 -16 -1 8 3.17 19.96
 -16 -1 -9 5.76 17.8
 16 -1 9 19.92 17.8
 -16 1 -9 -2.16 17.83
 -16 -1 9 15.15 32.59
 -16 -1 -10 -7.27 16.54
 16 -1 10 0.63 16.7
 -16 1 -10 4.52 16.7
 -16 -1 10 6.82 19.29
 16 1 10 3.74 11.95
 16 -1 11 -0.65 30.99
 -16 -1 -11 11.19 19.58
 -16 -1 11 14.52 22.17
 16 1 11 7.65 13.8
 -16 1 -11 4.46 19.87
 16 -1 12 12.83 21.09
 -16 1 12 21.83 24.42
 -16 -1 -12 11.19 34.1
 -16 1 -12 6.98 21.74
 -16 -1 12 22.91 24.53
 16 1 12 13.41 13.95
 -16 -1 -13 31.94 30.29
 -16 1 13 -12.69 22.12
 16 -1 13 -0.77 19.09
 -16 1 -13 -0.63 19.63
 -16 -1 13 31.53 34.71
 -16 -1 -14 -3.02 21.74
 -16 1 14 12.67 24.1
 16 -1 14 12.33 32.43
 -16 -1 14 14.45 25
 -16 1 -14 9.88 21.81
 -16 -1 -15 -8.46 21.83
 16 -1 15 30.97 29.98
 -16 1 15 19.4 39.23
 -16 1 -15 3.98 22.44
 -16 -1 15 3.17 25.27
 -16 -1 -16 -1.37 21.16
 -16 1 16 -3.49 24.53
 16 -1 16 9.41 18.48
 -16 -1 16 5.83 23.92
 -16 1 -16 -4.5 21.92
 -16 1 17 12.04 28.18
 -16 -1 -17 5.04 25.14
 16 -1 17 18.55 21.63
 -16 -1 17 -19.78 45.62
 -16 1 -17 12.11 26.04
 -16 -1 -18 15.91 27.03
 -16 1 18 9.93 48.34
 16 -1 18 8.39 22.6
 -16 -1 18 36.28 30.05
 -16 1 -18 4.64 28
 16 -1 19 8.26 33.96
 -16 -1 -19 -2.7 25.86
 -16 1 19 8.21 28
 -16 -1 19 12.47 27.84
 -16 1 -19 4.1 25.81
 16 -1 20 13.66 24.33
 -16 -1 -20 4.46 44.23
 -16 1 20 35.22 31.31
 -16 1 -20 -2.07 29.28
 -16 -1 20 7.09 31.46
 -16 -1 -21 12.02 29.28
 -16 1 21 10.47 31.26
 -16 1 -21 -0.56 46.86
 -16 -1 21 11.7 48.93
 -16 1 22 15.15 51.22
 -16 -1 -22 10.4 30.14
 -16 1 -22 -2.63 50.73
 -16 -1 22 11.61 33.13
 -16 -1 -23 -9.03 30.18
 -16 1 23 3.67 34.07
 -16 -1 23 25.07 33.42
 -16 1 -23 12.4 32.48
 -16 -1 -24 5.36 34.5
 -16 1 24 43.24 37.05
 -16 1 -24 11.16 37.54
 -16 -1 24 9.18 36.93
 -16 1 25 22.82 52.62
 -16 -1 -25 7.94 31.78
 -16 1 -25 1.58 34.5
 -16 -1 25 -1.28 34.59
 -16 1 26 12.6 34.32
 -16 -1 -26 34.84 53.03
 -16 -1 26 12.06 59.6
 -16 1 -26 -6.14 35.97
 -17 -1 0 -4.93 11.32
 -17 1 0 10.04 18.12
 17 -1 0 14.52 17.65
 -17 -1 -1 8.73 12.15
 17 -1 1 15.48 17.98
 -17 1 1 -3.08 11.03
 -17 -1 1 2.81 11.16
 17 -1 -1 5.69 18.23
 -17 -1 1 0.29 25.91
 -17 1 -1 -4.25 12.45
 -17 -1 -2 15.55 13.95
 17 -1 2 18.97 30.25
 -17 1 2 -0.45 17.8
 -17 1 -2 2.97 14.43
 -17 -1 2 0.92 18.25
 -17 -1 2 10.17 11.23
 -17 -1 -3 5.13 12.99
 17 -1 3 0.23 17.13
 -17 -1 3 1.82 9.48
 -17 -1 3 -5.15 16.97
 -17 1 -3 0.97 13.57
 -17 -1 -4 7.31 13.95
 17 -1 4 7.7 17.01
 -17 -1 4 8.8 17.65
 -17 -1 4 -2.68 9.3
 -17 1 -4 -1.17 14.81
 -17 -1 -5 -3.65 15.98
 17 -1 5 6.03 18.55
 -17 -1 5 15.73 20.19
 -17 1 -5 13.82 25.88
 -17 -1 -6 1.15 17.31
 17 -1 6 2.5 29.3
 -17 -1 6 10.22 21.83
 -17 1 -6 41.91 27.5
 17 -1 7 2.05 17.38
 -17 -1 -7 6.28 16.5
 -17 -1 7 0.45 21.2
 -17 1 -7 5.27 16.65
 -17 -1 -8 9.3 16.81
 17 -1 8 -2.16 17.17
 -17 1 -8 5.4 17.38
 -17 -1 8 -6.59 20.89
 -17 -1 -9 28.81 28.29
 17 -1 9 7.4 27.86
 -17 -1 9 11.59 20.82
 -17 1 -9 -13.01 18.88
 -17 -1 -10 17.38 29.87
 17 -1 10 -6.86 19.33
 -17 -1 10 10.11 22.48
 -17 1 -10 9.43 19.6
 -17 -1 -11 14.85 20.32
 17 -1 11 11.55 20.71
 -17 1 -11 -5.45 22.19
 -17 -1 11 17.53 24.87
 -17 -1 -12 9.27 17.69
 -17 1 12 -4.66 21.25
 17 -1 12 -4.64 17.44
 -17 -1 12 -5.78 21.07
 -17 1 -12 4.73 18.86
 -17 1 13 20.73 27.12
 -17 -1 -13 21.85 23.86
 17 -1 13 16 34.1
 -17 -1 13 -9.86 44.11
 -17 1 -13 12.69 24.87
 -17 -1 -14 2.52 23.41
 -17 1 14 12.51 26.94
 17 -1 14 17.35 23.23
 -17 -1 14 30.54 28.43
 -17 1 -14 3.22 25.12
 17 -1 15 5.02 20.66
 -17 1 15 -1.26 25.75
 -17 -1 -15 26.49 21.9
 -17 1 -15 -5.45 22.46
 -17 -1 15 -22.15 25.16
 -17 -1 -16 -15.42 22.15
 -17 1 16 -11.52 25.25
 17 -1 16 0 20.48
 -17 -1 16 18.77 25.52
 -17 1 -16 5.92 22.66
 -17 -1 -17 16.47 24.87
 -17 1 17 24.44 28.88
 17 -1 17 -7 35.34
 -17 -1 17 8.01 44.63
 -17 1 -17 -14.47 26.6
 -17 -1 -18 -1.89 41.73
 -17 1 18 39.45 48.07
 17 -1 18 1.76 34.98
 -17 -1 18 -0.77 29.98
 -17 1 -18 22.93 43.62
 -17 1 19 -2 29.03
 -17 -1 -19 7.18 26.02
 17 -1 19 0.25 21.45
 -17 1 -19 25.77 42.94
 -17 -1 19 5.33 29.46
 -17 -1 -20 5.9 26.24
 -17 1 20 -12.94 28.4
 -17 -1 20 -5.33 29.19
 -17 1 -20 8.3 43.96
 -17 -1 -21 30.88 33.06
 -17 1 21 19.09 35.7
 -17 -1 21 4.39 56.6
 -17 1 -21 12.2 36.28
 -17 -1 -22 -8.01 29.82
 -17 1 22 14.04 32.57
 -17 -1 22 16.95 32.88
 -17 1 -22 0.14 32.23
 -17 -1 -23 5.4 35.04
 -17 1 23 37.5 37.92
 -17 -1 23 16.68 37.86
 -17 1 -23 11.79 37.47
 -17 1 24 21.88 30.59
 -17 -1 -24 -13.57 28.29
 -17 1 -24 -5.83 30.14
 -17 -1 24 -1.51 30.56
 -18 -1 0 5.38 28.99
 18 -1 0 -0.32 24.55
 -18 -1 0 9.41 20.05
 -18 -1 -1 8.94 19.9
 18 -1 1 29.66 19.94
 -18 -1 1 -1.6 17.98
 -18 1 -1 -10.17 22.17
 -18 -1 1 -7.56 17.85
 -18 -1 -2 12.99 23.11
 18 -1 2 18.61 21.63
 -18 -1 2 2.75 20.59
 -18 -1 2 18.52 20.3
 -18 1 -2 1.67 15.66
 18 -1 3 -17.35 18.16
 -18 -1 -3 18.34 20.77
 -18 -1 3 16.5 18.07
 -18 1 -3 -6.75 14.29
 -18 -1 -4 0.07 22.75
 18 -1 4 9.95 28.7
 -18 1 -4 2.05 15.57
 -18 -1 4 -10.53 30.65
 -18 -1 -5 17.49 25.39
 18 -1 5 -5.92 20.08
 -18 -1 5 6.64 22.06
 -18 1 -5 6.19 17.78
 18 -1 6 12.4 19.36
 -18 -1 -6 -16.95 24.73
 -18 -1 6 -9.03 21.72
 -18 1 -6 14.81 18.1
 18 -1 7 -6.12 19.06
 -18 -1 -7 -0.65 16.99
 -18 -1 7 -11.95 22.33
 -18 1 -7 18.14 28.99
 18 -1 8 10.56 19.11
 -18 -1 -8 3.38 18.61
 -18 -1 8 -27.35 36.53
 -18 1 -8 16.45 31.69
 -18 -1 -9 5.51 21.2
 18 -1 9 8.67 20.91
 -18 -1 9 18.05 25.75
 -18 1 -9 29.21 34.66
 -18 -1 -10 5.11 21.92
 18 -1 10 28.04 21.25
 -18 1 -10 10.92 36.64
 -18 -1 10 -1.8 26.2
 -18 -1 -11 18.75 22.87
 -18 1 11 -3.65 27.1
 -18 -1 11 20.62 27.55
 -18 1 -11 11.21 37.05
 -18 -1 -12 27.77 24.24
 -18 1 12 5.49 28.49
 18 -1 12 -0.32 37.02
 -18 -1 12 5.65 28.9
 -18 1 -12 29.98 40.17
 18 -1 13 -7.52 20.48
 -18 1 13 3.78 25.72
 -18 -1 -13 1.87 22.08
 -18 -1 13 23.36 26.72
 -18 1 -13 8.1 36.53
 -18 1 14 -23.32 40.74
 -18 -1 -14 8.44 22.62
 18 -1 14 -3.42 21.2
 -18 -1 14 4.1 27.66
 -18 1 -14 37.88 37.86
 18 -1 15 -0.95 19.2
 -18 1 15 -7.11 25.61
 -18 -1 -15 3.06 34.03
 -18 -1 15 5.27 25.84
 -18 1 -15 7.85 35.9
 -18 1 16 9.5 32.45
 18 -1 16 17.33 37.38
 -18 -1 16 0.38 32.59
 -18 1 -16 39.54 47.8
 -18 -1 -17 4.97 27.77
 -18 1 17 1.44 31.96
 18 -1 17 16.36 23.61
 -18 1 -17 12.54 47.11
 -18 -1 17 8.06 48.64
 -18 -1 -18 15.06 28.74
 -18 1 18 -0.32 49.31
 -18 1 -18 -13.39 48.93
 -18 -1 18 17.31 32.12
 -18 -1 -19 -12.72 27.98
 -18 1 19 5.42 31.19
 -18 -1 19 7.02 32.45
 -18 1 -19 29.44 31.06
 -18 -1 -20 -15.73 25.86
 -18 1 20 10.04 28.43
 -18 1 -20 -7.9 27.84
 -18 -1 20 15.6 28.76
 -18 -1 -21 -2.86 29.26
 -18 1 21 11.97 31.53
 -18 -1 21 15.51 50.46
 -18 1 -21 -1.13 31.13
 -18 -1 -22 1.53 29.03
 -18 1 22 -9.9 31.87
 -18 -1 22 11.23 31.82
 -18 1 -22 8.69 31.62
 -19 -1 0 11.97 21.72
 -19 -1 -1 -5.24 14.7
 -19 -1 -1 2.61 30.72
 -19 -1 1 -16.29 20.86
 -19 -1 -2 13.21 14.99
 19 -1 2 10.2 23.38
 -19 -1 2 -3.65 21.74
 -19 -1 -3 5.72 13.71
 19 -1 3 -8.51 20.1
 -19 -1 3 -6.21 29.98
 -19 1 -3 -3.33 24.53
 -19 -1 -4 7.25 15.96
 19 -1 4 3.89 22.33
 -19 1 -4 7.63 17.26
 -19 -1 4 -3.24 23.36
 -19 -1 -5 8.06 16.52
 19 -1 5 34.55 22.46
 -19 1 -5 -8.35 18.12
 -19 -1 5 -6.93 24.55
 -19 -1 -6 13.12 16.72
 19 -1 6 -1.53 20.86
 -19 -1 6 -10.89 23.7
 -19 1 -6 -0.2 18.21
 -19 -1 -7 10.53 18.12
 19 -1 7 -8.42 21.61
 -19 -1 7 0.29 25.14
 -19 1 -7 8.96 19.65
 -19 -1 -8 15.55 19.6
 19 -1 8 5.06 22.06
 -19 1 -8 -12.04 21.27
 -19 -1 8 25.45 39.12
 19 -1 9 16.02 22.33
 -19 -1 -9 8.35 21.31
 -19 -1 9 -10.13 26.65
 -19 1 -9 9.84 22.71
 19 -1 10 23.68 35.74
 -19 1 10 7.43 43.93
 -19 -1 -10 13.73 22.64
 -19 1 -10 4.59 24.35
 -19 -1 10 6.75 28.31
 19 -1 11 14.09 21.54
 -19 1 11 -7.13 27.39
 -19 -1 -11 4.46 21.99
 -19 -1 11 18.41 27.12
 -19 1 -11 -4.19 24.42
 -19 -1 -12 0.32 34.46
 -19 1 12 8.26 25.57
 19 -1 12 2.54 20.57
 -19 -1 12 -12.22 41.41
 -19 1 -12 1.55 22.82
 -19 1 13 -2.23 30.34
 19 -1 13 3.69 23.36
 -19 -1 13 27.73 31.55
 -19 1 -13 20.73 28.07
 -19 1 14 -5.74 28.92
 -19 -1 -14 0.79 37.16
 19 -1 14 -3.74 32.12
 -19 -1 14 -2.03 29.53
 -19 1 -14 -3.71 25.5
 -19 -1 -15 -0.74 28.31
 -19 1 15 24.33 34.91
 19 -1 15 25.68 39.84
 -19 -1 15 23.97 35.52
 -19 1 -15 27.17 31.69
 -19 -1 -16 8.71 24.42
 -19 1 16 -12.13 29.26
 -19 -1 16 10.98 29.28
 -19 1 -16 -3.44 26.67
 -19 1 17 38.71 53.34
 -19 -1 -17 -4.75 29.06
 -19 1 -17 13.82 31.44
 -19 -1 17 22.66 51.9
 -19 -1 -18 20.64 30.32
 -19 1 18 11.34 34.01
 -19 1 -18 18.73 32.14
 -19 -1 18 -9.61 34.93
 -19 -1 -19 -10.2 29.26
 -19 1 19 8.26 32.57
 -19 -1 19 21.04 33.53
 -19 1 -19 11.46 31.33
 -20 -1 0 2.63 20.08
 -20 -1 -1 27.75 22.53
 -20 -1 1 0.14 23.99
 -20 -1 -2 -7.36 20.01
 -20 -1 2 3.44 34.43
 20 -1 3 -20.12 30.23
 -20 -1 3 -1.37 25.48
 -20 -1 -4 13.01 26
 20 -1 4 3.76 24.64
 -20 -1 4 4.28 26.11
 -20 -1 -5 -8.98 25.07
 20 -1 5 10.2 22.8
 -20 -1 5 -9.61 24.67
 20 -1 6 -19.45 23.99
 -20 -1 -6 6.44 28.02
 -20 -1 6 -10.51 26.42
 -20 1 -6 3.15 20.77
 -20 -1 -7 -12.56 28.58
 20 -1 7 18.79 23.52
 -20 -1 7 40.42 39.9
 -20 1 -7 -7.88 19.9
 20 -1 8 -19.27 38.01
 -20 -1 8 13.12 27.84
 -20 1 -8 17.04 22.24
 -20 -1 -9 8.46 29.8
 20 -1 9 -4.34 22.08
 -20 -1 9 10.38 26
 -20 1 -9 -1.89 20.68
 -20 -1 -10 -2.52 19.78
 20 -1 10 16.36 21.52
 -20 1 10 -22.98 26.24
 -20 -1 10 -3.11 26.18
 -20 1 -10 0.52 20.98
 -20 1 11 17.67 29.55
 -20 -1 -11 13.28 22.73
 20 -1 11 -5.33 23.7
 -20 -1 11 1.96 29.42
 -20 1 -11 6.23 24.51
 20 -1 12 22.66 35.4
 -20 -1 -12 14.65 23.83
 -20 1 12 1.98 29.75
 -20 -1 12 20.46 48.7
 -20 1 -12 -13.39 25.32
 -20 -1 -13 -8.08 21.52
 -20 1 13 15.64 43.33
 20 -1 13 3.04 19.69
 -20 -1 13 21.47 27.91
 -20 1 -13 -15.1 23.25
 -20 -1 -14 -1.49 25.86
 -20 1 14 2.68 32.27
 -20 1 -14 1.64 27.28
 -20 -1 14 22.6 31.28
 -20 -1 -15 13.71 26.51
 -20 1 15 16.86 32.52
 -20 1 -15 0.47 27.91
 -20 -1 15 -10.15 32.81
 -20 -1 -16 8.91 26.33
 -20 1 16 -14.04 32.05
 -20 -1 16 18.37 51.02
 -20 1 -16 7.83 28.67
 -21 -1 0 -5.31 21.79
 -21 -1 -1 17.31 22.53
 -21 -1 1 -5.09 39.36
 -21 -1 -2 22.51 23.81
 -21 -1 2 13.91 28.29
 -21 -1 -3 16.02 26.67
 -21 -1 3 37.74 30.05
 -21 -1 4 17.98 29.35
 21 -1 5 -9.7 24.85
 -21 -1 5 3.22 26.42
 21 -1 6 3.67 24.91
 -21 -1 6 4.28 40.69
 -21 -1 -7 -1.69 18.05
 21 -1 7 -11.5 22.93
 -21 -1 7 20.44 24.8
 -21 -1 -8 20.14 20.55
 21 -1 8 2.79 26.38
 -21 -1 8 -6.73 29.89
 -21 1 9 30.72 29.84
 21 -1 9 -10.38 24.73
 -21 -1 -9 6.8 20.46
 -21 -1 9 0.36 29.6
 -21 -1 -10 2.3 21.97
 21 -1 10 16.34 38.17
 -21 1 10 22.37 30.16
 -21 -1 10 1.44 30.5
 -21 1 -10 -0.29 24.01
 21 -1 11 -6.86 23.36
 -21 -1 -11 -0.34 22.1
 -21 1 11 1.73 29.87
 -21 -1 11 6.75 48.34
 -21 -1 11 0.63 47.26
 -21 1 -11 -13.44 23.36
 -21 -1 -12 -11.03 24.8
 -21 1 12 38.42 50.37
 -21 -1 12 19.33 34.21
 -21 1 -12 20.71 25.93
 -21 -1 -13 -2.88 21.34
 -21 1 13 22.8 28.83
 -21 -1 13 2.99 29.01
 -21 1 -13 -11.82 22.75
 -22 -1 0 -1.98 23.05
 -22 -1 1 -1.89 23
 -22 -1 2 8.21 25.97
 -22 -1 3 2.27 24.51
 -22 -1 4 26 31.98
 -22 -1 5 -4.32 40.31
 -22 -1 6 -1.58 25.21
 22 -1 7 -17.69 30
 -22 -1 7 5.67 26.65
 0 -2 0 9413.09 538.96
 0 2 0 9999 569.46
 0 -2 0 9457.61 568.33
 0 2 -1 10.83 5
 0 -2 1 5.31 8.76
 0 2 1 9 4.68
 0 -2 2 4130.85 190.92
 0 -2 2 4164.79 202.15
 0 2 2 4071.3 182.44
 0 -2 -2 4097.04 177.94
 0 2 -2 3976.3 197.99
 0 2 -2 4294.94 194.48
 0 -2 3 4069.77 193.67
 0 -2 3 4050.84 199.54
 0 2 -3 4311.64 195.51
 0 -2 -3 3976.66 167.61
 0 2 3 3923.43 165.92
 0 2 -3 4259.68 210.68
 0 2 4 71.37 6.05
 0 -2 4 92.21 11.73
 0 -2 4 61.96 9.81
 0 -2 -4 72.2 5.69
 0 2 -4 71.48 9.27
 0 2 -4 67.97 18.88
 0 -2 -5 1041.08 34.64
 0 -2 5 1115.6 48.43
 0 2 5 955.9 37.11
 0 -2 5 1068.45 48.19
 0 2 -5 1120.17 46.23
 0 2 -5 1036.16 51.99
 0 2 6 6.55 3.11
 0 2 -6 5.63 6.8
 0 2 6 -0.07 0.88
 0 -2 -6 0.07 1.01
 0 -2 6 -4.3 6.37
 0 -2 -6 -1.31 2.9
 0 2 -6 5.76 6.01
 0 -2 6 -4.77 6.5
 0 -2 -7 177.76 8.6
 0 2 -7 200.74 16.43
 0 2 -7 177.58 27.64
 0 -2 7 179.44 14.49
 0 2 7 177.8 9.12
 0 -2 7 161.82 15.98
 0 -2 -8 292.85 17.56
 0 2 -8 297.09 24.58
 0 -2 8 286.01 21.36
 0 -2 8 310.37 19.78
 0 2 -8 349.35 32.12
 0 -2 9 11.95 10.29
 0 2 9 28.31 8.01
 0 -2 9 38.85 9.23
 0 -2 -9 27.95 7.94
 0 -2 9 24.76 15.62
 0 2 -9 41.41 16.61
 0 2 10 36.19 5.63
 0 -2 10 34.39 12.56
 0 -2 -10 53.23 8.21
 0 2 -10 37.32 12.24
 0 2 10 40.4 9.61
 0 2 11 893.01 34.43
 0 2 11 886.33 34.64
 0 2 -11 895.04 51.02
 0 -2 11 868.86 49
 0 -2 -11 885.9 40.42
 0 -2 12 7.16 10.33
 0 2 -12 5.24 15.73
 0 -2 -12 11.21 10.92
 0 2 12 9.32 5.51
 0 2 12 4.3 5.02
 0 2 13 13.01 7.07
 0 2 13 27.19 9.95
 0 -2 13 22.87 12.24
 0 -2 -13 21.63 7.99
 0 2 -13 31.17 12.65
 0 2 14 13.28 6.53
 0 -2 -14 13.03 8.01
 0 -2 14 25.97 12.45
 0 2 14 9.14 10.85
 0 2 -14 6.91 12.33
 0 -2 -15 52.96 10.56
 0 2 15 59.6 8.89
 0 2 -15 56.56 17.22
 0 2 15 59.1 10.38
 0 -2 15 46.05 17.29
 0 2 -16 144.13 23.59
 0 -2 -16 137.65 16.45
 0 2 16 139.63 15.03
 0 -2 16 143.43 22.57
 0 2 16 142.11 19.06
 0 -2 17 180.7 26.83
 0 2 -17 200.51 27.14
 0 2 17 173.62 16.02
 0 -2 -17 193.85 19.18
 0 -2 -18 44.14 12.04
 0 -2 18 60.18 18.3
 0 2 -18 48.95 28.43
 0 2 18 28.94 16.23
 0 -2 -19 7.52 9.72
 0 2 -19 14 21.97
 0 -2 19 7.4 15.21
 0 2 19 7.58 9.09
 0 2 20 165.67 19.24
 0 2 -20 161.06 42.06
 0 -2 -20 168.84 19.72
 0 -2 20 159.75 30.43
 0 -2 21 33.83 22.19
 0 2 21 43.98 21.85
 0 2 -21 59.82 32
 0 -2 -21 43.78 13.41
 0 -2 -22 26.99 18.14
 0 2 -22 23.65 26.96
 0 -2 22 5.18 19.04
 0 2 22 4.37 11.93
 0 2 -23 97.14 44.05
 0 -2 23 129.26 29.57
 0 -2 -23 91.4 20.89
 0 2 23 89.53 19.69
 0 2 24 24.94 24.35
 0 -2 -24 24.04 15.3
 0 2 -24 17.56 34.32
 0 -2 24 16.95 23.25
 0 -2 25 81.36 29.98
 0 -2 -25 67.09 31.73
 0 2 -25 93.56 46.23
 0 2 25 63.22 21.83
 0 -2 26 15.33 23.47
 0 2 -26 47.42 38.17
 0 2 26 6.12 16.14
 0 -2 -26 6.37 14.88
 0 -2 27 -21.58 23.25
 0 -2 -27 24.08 15.64
 0 2 -27 -1.8 39.3
 0 2 27 9.84 36.42
 0 -2 -28 100.22 40.33
 0 2 -28 80.87 42.69
 0 2 28 132.09 39.7
 0 -2 28 99.48 39.41
 0 -2 -29 43.08 23.54
 0 -2 29 84.89 56.99
 0 2 -29 75.42 39.12
 0 2 29 86.72 36.8
 0 -2 29 81.77 56.45
 0 -2 -30 -7.36 18.1
 0 2 30 26.56 41.34
 0 2 -30 18.28 29.66
 0 -2 30 20.98 27.19
 0 2 31 7.04 20.12
 0 -2 -31 13.53 30.86
 0 2 -31 8.44 30.95
 0 -2 31 -0.86 28.81
 0 -2 -32 -4.88 19.78
 0 -2 32 12.54 27.93
 0 2 -32 22.6 30.86
 0 2 32 -0.63 20.26
 0 -2 -33 14.22 22.15
 0 2 33 10.2 22.75
 0 -2 33 4.07 32.12
 0 2 -33 1.82 34.77
 0 -2 -34 8.06 39.41
 0 2 -34 43.33 39.79
 0 -2 34 16.77 37.61
 0 2 -35 1.69 37.14
 0 -2 -35 13.57 22.64
 0 -2 35 15.55 35.02
 0 -2 36 8.21 54.24
 0 2 -36 58.34 58.25
 0 -2 -36 1.51 21.7
 1 2 0 6.08 4.34
 -1 -2 0 4.32 7.31
 -1 2 0 1.13 6.03
 -1 2 0 15.82 7.31
 1 -2 0 24.55 9.07
 1 -2 0 24.22 7.13
 -1 2 1 2532.86 109.09
 1 -2 1 2426.95 113.75
 1 2 -1 2519.67 114.85
 1 -2 1 2549.18 120.91
 -1 -2 -1 2623.43 106.3
 1 2 1 2559.69 102.85
 -1 2 -1 2418.73 110.08
 -1 -2 1 2437.68 112.89
 -1 -2 1 2645.67 109.11
 1 -2 -1 2736.55 115.73
 -1 2 -1 2594.33 123.47
 1 -2 -1 2628.9 119.46
 1 -2 2 1091.63 52.31
 -1 -2 -2 1026.68 35.25
 1 -2 2 1152.31 49.04
 -1 2 2 1143.08 49.9
 1 2 -2 916.69 41.66
 1 -2 -2 1176.78 50.57
 -1 2 -2 1035.12 49.63
 1 -2 -2 1160.1 49.09
 1 2 2 961.88 34.8
 -1 -2 2 944.87 44.23
 -1 -2 2 1194.04 65.83
 -1 2 -2 1282.6 60.43
 1 2 -3 2056.78 100.33
 1 -2 3 2317.99 113.03
 -1 2 3 2179.6 88
 1 2 -3 2185 101.68
 -1 -2 -3 2380.16 88.9
 1 -2 3 2049.58 100.45
 1 -2 -3 2111.25 82.55
 1 2 3 2328.03 88.59
 -1 -2 3 1997.21 95.47
 -1 -2 3 2050.35 104.16
 -1 2 -3 2031.51 95.11
 -1 2 -3 2191.28 109.38
 1 2 -4 1394.26 66.51
 -1 -2 -4 1303.24 40.47
 -1 2 4 1318.5 49.29
 1 -2 4 1320.95 65.07
 1 -2 4 1345.53 77.35
 1 2 -4 1256.63 61.94
 1 -2 -4 1254.33 45.94
 -1 -2 4 1312.58 59.78
 -1 2 -4 1214.61 60.99
 -1 -2 4 1263.13 59.82
 -1 2 -4 1281.23 62.57
 1 2 4 1480.66 49.33
 1 2 -5 15.69 16.09
 -1 2 5 25.57 7.99
 1 -2 5 22.21 8.91
 1 -2 5 15.39 8.37
 1 2 -5 32.52 10.06
 -1 -2 -5 19.81 3.17
 1 2 5 17.51 4.95
 -1 -2 5 20.71 7.81
 1 -2 -5 25.43 5.4
 -1 -2 5 17.26 8.98
 -1 2 -5 13.84 7.88
 -1 2 6 3.33 4.84
 1 -2 6 8.57 7.92
 1 -2 6 7.07 7.07
 -1 -2 -6 16.47 4.14
 1 2 -6 17.01 10.02
 1 2 -6 10.04 8.96
 -1 -2 6 11.25 7.65
 1 2 6 11.39 4.25
 1 -2 -6 15.33 4.48
 -1 2 -6 1.85 9.52
 -1 2 -6 6.55 7.88
 -1 -2 6 14.94 7.63
 1 -2 7 15.19 7.36
 -1 2 7 11.39 4.88
 1 -2 7 9.7 8.48
 1 2 -7 2.72 17.47
 -1 -2 -7 18.14 6.93
 1 2 -7 8.71 14.31
 1 2 7 12.63 4.64
 -1 -2 7 6.21 7.58
 -1 2 -7 10.11 9.12
 -1 -2 7 5.81 7.94
 1 -2 -7 10.31 4.64
 -1 2 -7 -10.8 12.87
 1 2 -8 8.87 7.61
 -1 2 8 2.34 4.93
 1 -2 8 8.33 7.02
 1 2 -8 5.06 7.76
 1 -2 8 1.87 8.12
 -1 -2 -8 6.95 6.53
 -1 -2 8 6.37 7.4
 -1 2 -8 4.03 7.88
 -1 2 -8 4.91 8.64
 -1 -2 8 8.6 11.1
 1 -2 -8 -6.95 5.54
 1 -2 -8 0.81 5.09
 1 2 8 5.47 2.97
 1 -2 9 7.2 9.7
 -1 -2 -9 15.26 10.85
 -1 2 9 6.82 8.57
 -1 2 -9 10.69 14.76
 1 -2 -9 4.75 5.67
 -1 -2 9 9.61 8.19
 -1 -2 9 4.37 7.52
 1 2 9 6.75 5.45
 1 2 9 7.16 4.75
 1 2 -10 124.51 16.97
 -1 -2 -10 107.87 12.33
 -1 2 10 99.34 9.79
 1 -2 10 103.85 16.61
 -1 -2 10 106.39 15.01
 -1 2 -10 100.74 16.16
 -1 -2 10 105.11 13.01
 1 2 10 105.47 9.32
 1 2 10 92.55 10.15
 1 -2 -10 88.81 9.84
 -1 2 11 2.7 5.15
 1 -2 11 6.8 14.34
 -1 -2 -11 2.03 6.73
 1 2 -11 7.18 10.02
 -1 2 11 3.06 5.31
 -1 2 -11 -3.78 9.5
 -1 -2 11 12.2 8.69
 1 2 11 5 5.76
 1 -2 -11 1.87 1.19
 1 -2 -11 7 8.53
 1 2 11 4.86 5.65
 -1 2 12 1.24 9.39
 1 2 -12 15.3 9.88
 -1 -2 -12 16.97 10.85
 -1 2 12 6.66 5.9
 1 -2 12 5.18 10.06
 1 2 12 2.84 4.46
 1 -2 -12 7.29 6.19
 -1 -2 12 7 9.84
 -1 2 -12 1.53 10.74
 1 2 12 -0.34 6.62
 -1 2 13 245.46 18.34
 -1 -2 -13 261.73 19.58
 1 2 -13 306.11 26.83
 1 -2 13 253.42 26.2
 -1 2 13 257.59 24.33
 1 -2 -13 251.13 17.08
 -1 2 -13 270.57 36.01
 -1 -2 13 258.96 24.76
 1 2 13 257.27 13.44
 1 2 13 240.64 20.46
 -1 2 14 465.44 24.96
 1 2 -14 496.43 37.59
 1 -2 14 440 36.21
 -1 -2 -14 460.82 27.86
 -1 2 14 412.81 27.91
 -1 -2 14 401.34 36.28
 -1 2 -14 428.28 36.28
 1 2 14 411.42 23.23
 1 2 14 415.83 20.68
 1 -2 -14 449.91 24.62
 1 2 -15 82.71 17.6
 -1 -2 -15 79.65 12.87
 1 -2 15 73.89 18.19
 -1 2 15 69.16 11.28
 -1 2 -15 74.77 17.85
 -1 -2 15 71.39 17.1
 1 2 15 87.89 13.53
 1 -2 -15 69.91 11.21
 1 2 15 57.08 11.68
 1 -2 16 27.37 14.58
 -1 -2 -16 31.67 10.83
 1 2 -16 23.36 21.54
 -1 2 16 8.44 9.09
 -1 2 -16 11.7 13.95
 -1 -2 16 21.76 14.25
 1 -2 -16 29.51 9.16
 1 2 16 22.98 7.67
 -1 -2 -17 -2.95 9.9
 1 -2 17 7.99 13.12
 1 2 -17 5.45 13.01
 -1 2 17 12.83 8.01
 1 2 17 6.62 7.11
 1 -2 -17 16.05 12.87
 -1 2 -17 1.04 12.9
 -1 -2 17 3.33 12.81
 -1 2 18 -1.28 8.12
 -1 -2 -18 3.2 8.94
 1 2 -18 4.41 12.85
 1 -2 18 2.81 13.08
 1 -2 -18 8.44 8.03
 1 2 18 -2.5 7.38
 -1 -2 18 8.98 13.14
 -1 2 -18 12.63 12.94
 -1 2 19 -3.38 9.25
 1 2 -19 3.02 15.08
 1 -2 19 2.54 15.1
 -1 -2 -19 14.25 10.42
 1 -2 -19 14.02 14.07
 1 2 19 8.19 8.64
 -1 -2 19 17.87 14.49
 -1 2 -19 11.1 14.97
 1 -2 20 58.09 22.75
 1 2 -20 77.33 23.45
 -1 -2 -20 54.22 24.64
 -1 2 20 68.58 14.7
 -1 -2 20 64.05 22.39
 1 -2 -20 76.52 14.16
 1 2 20 76.39 20.57
 -1 2 -20 55.57 23.02
 1 2 -21 36.93 21.04
 -1 2 21 49.87 21.58
 -1 -2 -21 29.55 13.86
 1 -2 21 18.3 20.71
 -1 -2 21 20.98 20.17
 1 -2 -21 41.43 12.36
 -1 2 -21 30.74 20.48
 1 2 21 27.12 12.81
 1 -2 22 33.56 21.97
 -1 -2 -22 26.54 14.9
 1 2 -22 53.12 21.85
 -1 2 22 33.92 15.06
 -1 -2 22 26.04 21.72
 -1 2 -22 29.15 22.44
 1 -2 -22 39.36 14.65
 1 2 22 41.1 14.22
 -1 2 23 34.03 24.26
 1 2 -23 38.26 23.74
 1 -2 23 27.5 22.48
 -1 -2 -23 28.04 16.97
 1 -2 -23 50.01 14.83
 1 2 23 20.71 14.74
 -1 -2 23 34.25 23.07
 -1 2 -23 39.95 23
 -1 -2 -24 13.12 15.35
 1 2 -24 20.17 22.12
 -1 2 24 5.63 15.1
 1 -2 24 21.13 21.4
 1 2 24 17.42 19.67
 -1 -2 24 20.84 20.89
 -1 2 -24 0.99 21.09
 1 -2 -24 24.55 21.07
 1 2 -25 119.04 34.53
 -1 2 25 68.08 24.01
 -1 -2 -25 93.11 24.44
 1 -2 25 110.46 32.59
 -1 -2 25 110.33 49.96
 -1 2 -25 80.37 34.21
 1 2 25 133.26 32.21
 1 -2 -25 89.01 20.86
 -1 -2 -26 12.94 15.51
 1 -2 26 7.07 22.48
 1 2 -26 1.22 23.32
 -1 2 26 10.94 24.35
 1 -2 -26 9.66 13.98
 -1 -2 26 -10.29 36.33
 -1 2 -26 -2.36 22.78
 1 2 26 14.07 21
 -1 -2 -27 11.3 18.01
 -1 2 27 25.25 19.18
 1 2 -27 16.83 26.81
 1 -2 27 11.7 25.48
 -1 -2 27 14.18 26.4
 1 -2 -27 23.72 24.91
 -1 2 -27 7.76 25.52
 1 2 27 30.81 38.17
 -1 -2 -28 9.14 16.2
 1 2 -28 0 24.15
 -1 2 28 -9.05 17.29
 1 -2 28 -21.2 22.82
 1 -2 -28 -6.5 14.54
 -1 -2 28 16.43 23.88
 -1 2 -28 -6.35 23.5
 1 2 28 -3.15 15.71
 -1 -2 -29 -11.39 19.2
 1 2 -29 40.87 29.08
 1 -2 29 41.88 27.48
 -1 2 29 0.59 20.21
 -1 -2 29 16.45 28.18
 1 -2 -29 12.58 17.38
 1 2 29 19.29 18.66
 -1 2 -29 18.75 27.89
 -1 -2 -30 1.24 17.96
 1 -2 30 -10.17 25.63
 1 2 -30 -18.43 28.04
 -1 2 30 10.02 27.21
 -1 -2 30 30.56 26.54
 -1 2 -30 12.15 41.23
 1 2 30 5.18 17.89
 1 -2 -30 4.16 26.92
 -1 -2 -31 0.25 19.81
 1 -2 31 8.67 43.98
 1 2 -31 2.93 30.38
 -1 2 31 4.34 29.84
 -1 2 -31 30.07 45.71
 -1 -2 31 3.6 30.14
 1 2 31 24.37 29.44
 1 -2 -31 7.18 19.06
 -1 2 32 3.56 31.78
 1 2 -32 15.93 51.86
 -1 -2 -32 8.98 34.66
 1 -2 32 31.53 49.13
 -1 2 -32 3.96 53.07
 1 2 32 2.07 20.01
 -1 -2 32 24.87 31.82
 1 -2 -32 8.03 20.21
 1 -2 33 9.5 30.05
 -1 -2 -33 -17.42 20.95
 -1 2 33 -21.9 46.3
 1 2 -33 -6.35 48.91
 -1 -2 33 -8.91 46.54
 -1 2 -33 17.56 32.34
 -1 -2 33 -11.3 45.87
 1 -2 -33 16.29 29.8
 -1 2 34 -2.95 22.48
 -1 -2 -34 13.93 22.78
 1 2 -34 26.27 34.89
 1 -2 34 11.86 33.51
 -1 2 -34 -9.09 35.34
 -1 -2 34 7.09 31.58
 1 -2 -34 -1.44 19.45
 1 2 -35 19.99 33.47
 1 -2 35 -1.55 32.93
 -1 -2 -35 -12.33 35.4
 -1 -2 35 -3.24 32.54
 -1 2 -35 10.53 34.57
 1 -2 36 0.29 35.76
 -1 -2 -36 7.18 22.75
 1 2 -36 8.35 37.07
 -1 -2 36 2.7 35.02
 -1 2 -36 16.72 37.29
 -2 2 0 832.99 35.9
 2 2 0 339.51 22.64
 2 -2 0 463.97 30.11
 2 -2 0 922.27 36.84
 -2 -2 0 359.23 24.13
 -2 2 0 622.67 28.43
 -2 2 1 1778.65 76.99
 -2 2 1 1751.93 80.24
 2 -2 1 1759.2 77.87
 -2 -2 -1 1685.42 62.88
 2 -2 1 1282.87 86.81
 2 2 -1 1452.08 93.65
 -2 2 -1 1481.02 76.75
 -2 -2 1 1066.58 65.16
 2 -2 -1 1782.58 78.03
 2 -2 -1 1716.96 70.67
 2 2 1 1792.98 63.24
 -2 2 -1 1539.47 84.47
 2 -2 2 14.47 8.19
 -2 -2 -2 21.45 6.03
 -2 -2 2 17.4 6.73
 -2 2 3 193.06 11.48
 2 -2 3 162.81 16.41
 2 -2 3 132.7 14.92
 -2 -2 -3 147.44 6.14
 2 2 -3 115.32 12.06
 -2 2 -3 158.31 15.55
 2 2 3 145.66 6.23
 -2 -2 3 204.92 22.21
 2 -2 -3 211.07 11.95
 -2 2 -3 164.55 15.69
 -2 -2 3 151.38 11.59
 2 -2 -3 186.65 17.71
 -2 2 4 14.81 5.51
 2 2 -4 13.19 7.67
 -2 -2 -4 13.05 3.24
 2 -2 4 20.98 10.6
 2 2 -4 -0.61 6.01
 2 -2 4 17.47 8.67
 -2 2 -4 12.42 9.14
 -2 2 -4 9.43 7.07
 2 2 4 10.74 3.22
 -2 -2 4 25.45 11.91
 -2 -2 4 5.76 6.05
 -2 2 5 11.79 5.42
 2 2 -5 -1.19 9.88
 2 -2 5 5.65 6.71
 2 -2 5 11.7 8.1
 2 2 -5 7.07 12.58
 -2 -2 5 3.06 6.23
 -2 2 -5 35.22 12.58
 2 2 5 6.62 2.95
 -2 2 -5 9.5 11.32
 -2 -2 5 11.55 6.8
 2 -2 -5 8.12 8.08
 -2 2 6 57.62 7.81
 2 -2 6 38.8 9.36
 2 -2 6 42.94 11.68
 -2 -2 -6 42.74 2.27
 2 2 -6 46.95 11.12
 2 2 -6 39.05 9.25
 -2 -2 6 49.92 9.79
 -2 -2 6 54.94 10.74
 2 2 6 51.54 3.78
 -2 2 -6 46.32 10.76
 -2 2 -6 39.77 10.65
 2 -2 -6 44.54 7
 2 -2 7 38.08 12.47
 -2 -2 -7 48.68 9.81
 2 2 -7 19.99 9.9
 2 -2 7 26.29 9.23
 2 2 -7 47.06 11.59
 -2 2 7 45.69 7.56
 -2 -2 7 30.18 14.94
 -2 -2 7 36.8 9.88
 2 2 7 47.94 3.69
 2 2 7 41.66 3.94
 -2 2 -7 43.39 17.87
 -2 2 -7 28.54 10.98
 2 -2 -7 52.31 7.31
 -2 -2 -8 1.69 2.03
 2 -2 8 6.82 9.45
 2 2 -8 9.18 8.8
 2 2 -8 -0.79 7.83
 2 -2 8 7.99 7.16
 -2 2 8 3.29 6.01
 -2 -2 -8 9.3 7.18
 -2 -2 8 -0.5 7.67
 -2 -2 8 9.43 11.16
 2 2 8 6.23 2.16
 2 2 8 5.51 1.89
 -2 2 -8 -3.62 8.6
 2 -2 -8 8.24 5.56
 -2 2 -8 0.09 8.78
 2 -2 9 17.8 11.91
 -2 2 9 28.83 12.78
 -2 -2 -9 46.97 9.45
 2 2 -9 49.74 11.86
 -2 -2 9 37.68 11.23
 -2 -2 9 26.63 9.97
 -2 2 -9 37.61 12.18
 2 2 9 35.2 4.75
 2 -2 -9 47.65 6.98
 2 2 9 28.25 3.62
 -2 -2 -10 31.89 15.64
 2 2 -10 41.77 11.5
 2 -2 10 25.57 13.23
 -2 2 10 35.92 9.05
 -2 2 -10 61.31 18.79
 -2 -2 10 32.54 11.73
 -2 -2 10 41.73 10.13
 2 2 10 36.69 6.05
 2 2 10 43.37 5.58
 2 -2 -10 49.72 10.6
 2 2 -11 1.67 9.68
 2 -2 11 -2.77 10.67
 -2 -2 -11 10.96 8.42
 -2 2 11 16.41 10.65
 -2 -2 11 14.13 8.28
 -2 2 -11 9.09 10.47
 2 2 11 10.49 3.17
 2 -2 -11 14.52 8.51
 2 2 11 7.27 5.29
 -2 -2 11 5.13 10.38
 2 2 -12 6.73 10.78
 2 -2 12 -2.84 10.89
 -2 2 12 15.75 6.55
 -2 2 12 5.58 7.04
 -2 -2 -12 10.38 7.67
 2 2 12 4.91 3.65
 2 2 12 2.86 5.69
 2 -2 -12 -0.34 5.47
 -2 2 -12 10.06 10.58
 -2 -2 12 1.85 9.88
 2 -2 13 -12.45 10.62
 2 2 -13 8.48 10.35
 -2 -2 -13 1.62 7.29
 -2 2 13 2.79 10.67
 -2 2 13 9.57 10.4
 2 2 13 1.89 3.94
 -2 -2 13 -1.4 9.95
 2 -2 -13 4.37 5.13
 2 -2 -13 1.08 1.08
 2 2 13 7.38 5.96
 -2 2 -13 -3.2 9.88
 -2 -2 -14 6.73 9.09
 2 2 -14 17.13 12.69
 -2 2 14 10.87 7.97
 2 -2 14 18.86 12.54
 2 -2 -14 7.85 6.35
 2 2 14 15.48 5.15
 -2 -2 14 21.74 12.42
 2 2 14 2.54 6.08
 -2 2 -14 16.41 12.56
 -2 2 15 3.83 7.92
 2 2 -15 16.77 19.31
 2 -2 15 1.67 12.63
 -2 -2 -15 14.04 8.78
 2 2 15 6.57 5.38
 -2 -2 15 -2.05 12.54
 -2 2 -15 2.14 11.88
 2 2 -16 15.75 12
 -2 -2 -16 -1.33 10.06
 2 -2 16 -4.01 13.41
 -2 2 16 9.43 8.44
 -2 2 -16 8.87 20.14
 2 -2 -16 6.66 7.38
 2 2 16 9.32 9.57
 -2 -2 16 9.75 12.76
 2 -2 17 31.76 15.39
 -2 -2 -17 21.25 11.75
 2 2 -17 9.66 14.52
 -2 2 17 18.57 10.51
 2 -2 -17 19.13 8.12
 -2 2 -17 37.61 22.75
 -2 -2 17 9.03 15.37
 2 2 17 11.66 7.9
 -2 -2 -18 6.48 17.19
 2 2 -18 18.41 14.67
 -2 2 18 11.84 16.09
 2 -2 18 20.05 16.02
 2 -2 -18 9.99 8.35
 2 2 18 10.35 8.03
 -2 2 -18 19.02 23.02
 -2 -2 18 4.52 15.06
 -2 -2 -19 2.93 10.98
 2 2 -19 -0.18 15.03
 2 -2 19 16.68 24.33
 -2 2 19 7.65 9.95
 2 2 19 7.65 18.48
 2 -2 -19 11.61 8.08
 -2 -2 19 3.22 15.64
 -2 2 -19 5.94 23.45
 -2 2 20 16.29 11.86
 2 2 -20 5.99 17.74
 2 -2 20 17.78 28.27
 -2 -2 -20 16.32 12.99
 2 -2 -20 19.38 9.52
 -2 2 -20 6.48 27.73
 2 2 20 16.16 14.52
 -2 -2 20 27.39 18.68
 -2 -2 -21 8.67 11.91
 2 2 -21 21.85 16.68
 2 -2 21 10.6 27.19
 -2 2 21 5.09 11.3
 2 2 21 2.79 14.02
 2 -2 -21 -0.2 9.88
 -2 -2 21 14.76 17.89
 -2 2 -21 20.37 26.06
 -2 -2 -22 -1.26 13.03
 2 2 -22 21.79 18.16
 -2 2 22 4.84 12.22
 2 -2 22 34.14 29.39
 2 -2 -22 1.49 10.78
 2 2 22 27.73 24.1
 -2 2 -22 28.83 28.38
 -2 -2 22 15.42 28.61
 2 -2 23 35.2 37.7
 -2 -2 -23 49.36 26.45
 2 2 -23 49.31 24.73
 -2 2 23 39.9 26.69
 -2 2 -23 8.57 39.12
 2 -2 -23 24.08 22.42
 2 2 23 38.13 23.27
 -2 -2 23 51.2 36.78
 2 2 -24 -4.05 20.1
 -2 -2 -24 24.49 14.7
 2 -2 24 7.85 31.15
 -2 2 24 9.97 14.09
 -2 -2 24 0.68 19.56
 2 -2 -24 0.97 11.25
 2 2 24 -1.19 12.24
 -2 2 -24 5.94 31.91
 -2 -2 -25 -14.7 15.39
 2 -2 25 12.31 21.27
 2 2 -25 7.63 21.02
 -2 2 25 17.94 14.67
 -2 -2 25 2.61 19.94
 2 -2 -25 -0.9 12.15
 2 2 25 11.19 13.26
 -2 2 -25 12.49 20.98
 -2 2 26 10.67 16.83
 2 2 -26 1.33 23.36
 2 -2 26 3.85 23.77
 -2 -2 -26 8.76 25.57
 2 -2 -26 1.58 20.3
 -2 -2 26 8.39 22.08
 -2 2 -26 24.35 23.41
 2 2 26 6.23 14.83
 -2 -2 -27 4.73 16.65
 2 2 -27 -10.04 24.44
 -2 2 27 -7.2 17.04
 2 -2 27 -23.74 23.79
 2 2 27 12.94 22.66
 2 -2 -27 -10.42 13.64
 -2 -2 27 -14.85 22.06
 -2 2 -27 4.43 23.88
 -2 -2 -28 26.58 20.3
 2 2 -28 21.11 29.64
 2 -2 28 24.26 28.29
 -2 2 28 12.51 20.32
 2 -2 -28 13.39 16.32
 2 2 28 12.49 18.07
 -2 -2 28 5.9 27.84
 -2 2 -28 48.34 28.99
 2 2 -29 6.12 31.87
 -2 -2 -29 13.17 33.04
 -2 2 29 23.14 35.16
 2 -2 29 35.79 30.18
 2 -2 -29 22.78 27.98
 -2 -2 29 26.58 29.53
 -2 2 -29 23.29 30.97
 2 2 29 13.3 19.2
 2 -2 30 13.48 27.37
 -2 -2 -30 5.13 19.69
 2 2 -30 12.29 29.35
 -2 2 30 -4.23 20.64
 2 2 30 -2.48 17.13
 2 -2 -30 15.19 16.97
 -2 -2 30 31.13 41.46
 -2 2 -30 -3.92 27.71
 -2 -2 -31 3.33 20.59
 2 2 -31 46.54 30.45
 2 -2 31 -23.54 29.28
 -2 2 31 -1.69 21.76
 2 -2 -31 6.19 17.65
 2 2 31 1.49 27.86
 -2 2 -31 18.93 29.48
 -2 -2 31 2.41 29.6
 -2 -2 -32 9.79 21.25
 -2 2 32 18.64 50.5
 2 2 -32 6.41 32.21
 2 -2 32 13.66 30.18
 -2 -2 32 -20.95 30.79
 -2 2 -32 7.54 30.56
 2 -2 -32 4.21 26.83
 -2 -2 -33 23.9 23.52
 -2 2 33 -22.57 32.99
 2 2 -33 0.23 32.97
 2 -2 33 -1.85 31.87
 -2 -2 33 23.52 31.8
 -2 2 -33 -3.94 32.23
 2 -2 -33 3.15 17.31
 -2 -2 -34 -6.41 22.8
 2 2 -34 20.17 32.7
 2 -2 34 25.68 32.5
 -2 2 34 10.44 33.35
 -2 2 -34 -13.53 51.22
 -2 -2 34 -15.39 33.04
 2 -2 35 51.36 52.01
 2 2 -35 -3.94 34.03
 -2 2 35 5.78 52.22
 -2 -2 -35 -15.24 24.64
 -2 2 -35 9.77 56.96
 -2 -2 35 24.33 33.04
 2 -2 36 13.86 57.98
 2 2 -36 20.84 62.12
 -2 -2 -36 34.16 44.68
 -2 -2 36 16 40.71
 -2 2 -36 11.01 42.63
 3 2 0 6.21 4.93
 3 -2 0 1.8 6.39
 3 -2 0 -4.39 5.51
 -3 2 0 7.52 9.5
 -3 2 0 5.92 10.38
 -3 -2 0 9.68 3.51
 3 -2 1 96.69 11.07
 -3 2 1 90.34 15.69
 -3 2 1 94.14 10.47
 3 -2 1 69.75 13.89
 3 2 -1 44.47 6.12
 -3 -2 -1 58.2 5.6
 -3 2 -1 47.26 15.19
 -3 2 -1 58.58 15.84
 -3 -2 1 48.88 9.9
 3 -2 -1 80.62 9.57
 3 2 1 53.39 6.62
 3 -2 -1 92.7 9.43
 -3 -2 -2 160.9 6.95
 3 -2 2 202.99 16.2
 3 2 -2 109.83 10.08
 -3 2 2 171.9 18.28
 3 -2 2 117.26 12.92
 -3 2 2 187.84 12.99
 3 -2 -2 173.03 13.08
 3 -2 -2 156.92 16.14
 -3 2 -2 123.92 20.84
 -3 -2 2 109.88 11.21
 -3 2 -2 178.61 22.69
 3 2 2 170.55 8.67
 3 -2 3 132.16 14.4
 3 -2 3 60.59 11.7
 3 2 -3 73.6 8.94
 -3 -2 -3 109.31 6.41
 -3 2 3 120.03 15.42
 -3 2 -3 62.23 14.92
 3 2 3 98.49 5.47
 -3 2 -3 85.86 19.47
 -3 -2 3 110.01 12.56
 -3 -2 3 86.54 14.49
 3 -2 -3 121.69 15.19
 3 -2 -3 139.11 15.37
 -3 -2 -4 104.7 4.41
 -3 2 4 141.86 16.83
 3 -2 4 85.93 12.13
 3 2 -4 67.95 10.44
 3 -2 4 165.04 22.87
 -3 2 -4 78.55 14.45
 3 -2 -4 121.2 10.17
 3 2 4 129.62 4.19
 -3 -2 4 96.4 15.57
 -3 2 -4 100.09 14.43
 3 -2 -4 125.47 11.14
 -3 -2 4 138.19 19.99
 -3 2 5 78.21 9.75
 3 2 -5 49.45 8.96
 3 -2 5 65.38 12.83
 3 -2 5 53.41 15.1
 -3 -2 5 76.95 13.77
 -3 2 -5 48.61 18.12
 -3 2 -5 54.67 12.69
 -3 -2 5 73.08 16.54
 3 -2 -5 69.39 8.46
 3 2 5 58.45 1.53
 3 -2 -5 62.3 7.94
 -3 2 6 40.42 8.6
 3 2 -6 23.47 9.9
 3 -2 6 40.08 11.48
 -3 -2 -6 39.68 9.66
 3 -2 6 22.17 8.62
 3 2 -6 43.15 12.76
 -3 -2 6 27.68 8.73
 -3 2 -6 39.59 10.8
 -3 2 -6 21.67 10.47
 3 -2 -6 40.47 7.36
 -3 -2 6 46.21 12.24
 3 2 -7 19.78 13.75
 -3 -2 -7 42.56 9.97
 3 2 -7 46.61 11.37
 3 -2 7 54.62 18.82
 3 -2 7 22.93 9.18
 -3 2 7 41.37 9.07
 -3 -2 7 43.42 11.01
 -3 2 -7 43.15 12.04
 -3 2 -7 40.62 11.41
 -3 -2 7 54.58 14.43
 3 -2 -7 55.64 8.12
 -3 -2 -8 7.04 11.43
 3 2 -8 20.37 13.57
 3 -2 8 -5.06 9.93
 3 2 -8 -1.33 7.04
 -3 2 8 4.16 7.09
 -3 -2 8 11.32 11.57
 3 2 8 5.27 1.33
 -3 -2 8 7.54 11.14
 3 -2 -8 15.15 6.37
 -3 2 -8 6.14 8.91
 3 -2 9 -4.97 10.06
 -3 -2 -9 -2.21 7.81
 3 2 -9 7.2 9.21
 -3 2 9 -6.59 7.43
 -3 -2 9 4.34 12
 -3 2 -9 8.21 9.3
 3 -2 -9 8.39 4.68
 -3 -2 9 9.79 11.46
 3 2 9 5.67 2.18
 3 2 9 9.27 3.08
 3 -2 10 16.47 12.09
 3 2 -10 7.38 10.76
 -3 -2 -10 15.6 9.05
 -3 2 10 13.84 8.19
 3 2 10 9.39 4.88
 -3 2 -10 25.32 11.05
 3 -2 -10 16.52 5.38
 -3 -2 10 7.92 13.53
 -3 -2 10 31.71 14.52
 -3 -2 -11 9.05 8.48
 3 -2 11 13.91 11.28
 3 2 -11 13.93 10.11
 -3 2 -11 -1.37 10.33
 -3 -2 11 14.88 13.73
 3 -2 -11 7.16 7.2
 3 2 11 9.54 5.76
 3 2 11 3.53 3.8
 -3 -2 11 2.7 7.67
 3 2 -12 10.6 13.23
 3 -2 12 -5.9 11.01
 -3 -2 -12 1.26 7.79
 -3 -2 12 7.99 13.23
 3 -2 -12 3.22 7.25
 3 2 12 0.61 6.64
 -3 2 -12 21.58 15.26
 3 2 12 1.4 2.75
 -3 2 13 26.2 9.84
 3 -2 13 24.71 13.82
 3 2 -13 20.73 11.84
 -3 -2 -13 26.11 16.29
 3 2 13 35.36 10.62
 3 -2 -13 29.39 6.26
 -3 2 -13 24.42 13.64
 -3 -2 13 32.34 18.91
 -3 2 14 33.04 16.2
 3 2 -14 3.24 12.42
 -3 -2 -14 23 11.14
 3 -2 14 30.88 14.45
 3 -2 -14 26.4 6.93
 3 2 14 22.66 8.76
 -3 -2 14 40.04 20.03
 -3 2 -14 33.49 14.56
 3 2 -15 43.87 24.22
 3 -2 15 30.63 15.98
 -3 -2 -15 32.45 12.69
 -3 2 15 42.02 11.95
 3 -2 -15 47.38 8.53
 -3 -2 15 50.62 23.45
 3 2 15 38.53 7.18
 -3 2 -15 25.7 16.81
 3 2 -16 24.22 13.84
 3 -2 16 21.4 14.04
 -3 -2 -16 16.65 11.77
 -3 2 16 7.31 9.84
 3 2 16 4.75 6.48
 -3 -2 16 25.43 20.14
 3 -2 -16 22.33 11.01
 -3 2 -16 4.93 14.09
 3 -2 17 -0.97 11.55
 3 2 -17 11.75 11.64
 -3 -2 -17 -13.57 9.7
 -3 2 17 4.16 8.44
 3 -2 -17 -0.34 1.08
 -3 -2 17 9.97 16.9
 3 -2 -17 7.22 5.78
 -3 2 -17 4.37 12.02
 3 2 17 -1.33 5.6
 3 2 -18 19.29 13.82
 -3 -2 -18 6.23 15.71
 3 -2 18 17.44 20.46
 -3 2 18 7 9.5
 3 -2 -18 -8.08 10.08
 -3 -2 18 1.01 19.56
 3 2 18 -1.08 6.95
 -3 2 -18 -3.8 14.18
 3 2 -19 26.02 16.95
 -3 -2 -19 11.39 12.67
 3 -2 19 39.97 26.24
 -3 2 19 13.57 12.18
 -3 2 -19 15.24 16.95
 3 -2 -19 3.08 8.15
 3 2 19 20.46 13.71
 -3 -2 19 32.23 37.36
 3 -2 20 26.81 28.94
 3 2 -20 20.23 29.62
 -3 2 20 22.01 13.12
 -3 -2 -20 23.97 14.36
 3 -2 -20 13.53 15.28
 -3 -2 20 8.26 19.81
 3 2 20 11.73 15.66
 -3 2 -20 43.12 18.97
 3 2 -21 7.4 23.74
 -3 2 21 -1.49 11.79
 3 -2 21 1.6 26.47
 -3 -2 -21 8.46 12.18
 3 -2 -21 -0.99 8.89
 -3 2 -21 3.15 17.06
 -3 -2 21 7.67 17.83
 3 2 21 10.89 9.3
 -3 -2 -22 -2.72 11.77
 3 -2 22 -0.14 16.11
 3 2 -22 1.26 23.74
 -3 2 22 -3.87 17.76
 3 -2 -22 5.76 13.19
 -3 -2 22 6.17 16.23
 3 2 22 -1.26 9.21
 -3 2 -22 6.91 16.92
 3 2 -23 17.69 17.15
 -3 -2 -23 -1.42 20.1
 3 -2 23 2.12 18.37
 -3 2 23 11.01 12.92
 3 2 23 -6.26 10.56
 3 -2 -23 -3.17 9.75
 -3 -2 23 10.26 18.7
 -3 2 -23 15.64 18.97
 3 -2 24 18.5 21.04
 -3 2 24 10.15 14.9
 3 2 -24 23.59 20.57
 -3 -2 -24 -4.57 16.36
 -3 -2 24 1.19 22.21
 3 -2 -24 6.95 11.46
 3 2 24 8.96 12.47
 -3 2 -24 24.19 21.94
 -3 -2 -25 10.2 17.56
 -3 2 25 2.16 16.83
 3 2 -25 3.76 22.37
 3 -2 25 22.19 22.39
 3 -2 -25 12.69 11.7
 3 2 25 6.91 20.62
 -3 -2 25 7.72 22.89
 -3 2 -25 23.92 23
 3 -2 26 14.18 35.38
 -3 -2 -26 -2.48 17.6
 -3 2 26 10.42 17.22
 3 2 -26 36.93 22.55
 3 -2 -26 -3.06 12.29
 3 2 26 10.38 22.62
 -3 -2 26 7.34 23.43
 -3 2 -26 12.69 22.71
 3 2 -27 -16.43 23.52
 3 -2 27 24.69 35.72
 -3 -2 -27 6.75 17.17
 -3 2 27 -2.41 17.13
 3 -2 -27 0.63 19.38
 -3 -2 27 29.55 35.13
 3 2 27 7.76 14.56
 -3 2 -27 -4.14 36.19
 3 2 -28 7.38 24.87
 -3 -2 -28 -1.6 17.58
 -3 2 28 -10.2 17.83
 3 -2 28 33.31 36.62
 3 -2 -28 -0.38 13.53
 3 2 28 2.36 15.19
 -3 2 -28 31.46 38.91
 -3 -2 28 16.23 23.72
 -3 -2 -29 13.8 20.8
 3 2 -29 10.31 44.47
 -3 2 29 3.56 21.43
 3 -2 29 3.4 42.13
 -3 2 -29 11.48 29.35
 3 2 29 1.53 17.92
 3 -2 -29 16.72 16.14
 -3 -2 29 23.32 27.37
 -3 -2 -30 1.26 30.02
 3 2 -30 8.62 42.65
 3 -2 30 -12.83 25.41
 -3 2 30 11.39 20.08
 -3 2 -30 -0.68 27.98
 3 -2 -30 -14.36 23.9
 -3 -2 30 31.89 26.38
 -3 2 31 8.19 21.61
 -3 -2 -31 1.96 20.23
 3 2 -31 -12.94 44.07
 3 -2 31 6.75 26.33
 -3 2 -31 4.93 28.65
 -3 -2 31 -10.02 27.12
 3 -2 -31 2.77 14.83
 -3 -2 -32 0.77 20.86
 3 2 -32 26.24 51.29
 3 -2 32 1.78 26.94
 -3 2 32 4.19 21.83
 -3 2 -32 12.38 29.64
 -3 -2 32 -18.97 28.31
 -3 -2 -33 -6.68 33.98
 3 2 -33 2.21 34.53
 3 -2 33 2.21 28.7
 -3 2 33 2.27 22.98
 -3 2 -33 -12.6 31.15
 -3 -2 33 1.08 44.2
 3 -2 34 7.58 30.92
 3 2 -34 0.29 36.1
 -3 2 34 -2.77 54.24
 -3 -2 -34 -1.49 24.76
 -3 2 -34 6.05 33.47
 -3 -2 34 15.39 50.19
 3 2 -35 -12.04 38.17
 3 -2 35 -4.84 33.83
 -3 2 35 12.69 37.14
 -3 -2 -35 9.16 26.67
 -3 -2 35 46.52 36.96
 -3 2 -35 -5.27 37.61
 3 -2 36 10.69 32.23
 -3 2 36 21.09 35.83
 -3 -2 -36 -10.08 25.3
 -3 -2 36 -6.8 36.28
 -3 2 -36 35.25 55.21
 -4 -2 0 13.64 9.45
 -4 2 0 19.11 7.07
 -4 2 0 25.23 8.12
 4 -2 0 23.65 8.39
 4 -2 0 18.59 10.31
 4 2 0 11.86 3.89
 -4 2 1 158.99 15.42
 4 -2 1 151.6 14.22
 4 -2 1 88.27 11.37
 -4 2 1 125.63 18.86
 -4 -2 -1 137.72 10.44
 4 2 -1 93.58 11.19
 -4 2 -1 142.94 21.09
 4 -2 -1 170.28 13.19
 -4 2 -1 138.8 13.64
 4 -2 -1 126.33 15.87
 -4 -2 1 107.78 9.36
 -4 -2 -2 -1.06 2.5
 -4 2 2 6.86 6.48
 -4 2 2 2.23 5.67
 4 -2 2 4.25 8.01
 4 2 -2 3.06 3.74
 4 -2 2 7.56 5.24
 4 2 2 2.43 2.07
 -4 2 -2 -6.68 10.69
 -4 2 -2 -1.17 7.11
 4 -2 -2 16.05 6.46
 4 -2 -2 1.37 4.86
 -4 -2 2 10.98 4.46
 -4 -2 2 1.49 0.95
 -4 2 3 8.62 5.87
 4 2 -3 14.38 5.18
 -4 2 3 21.76 7.47
 -4 -2 -3 10.98 3.17
 4 -2 3 24.58 14.72
 4 -2 3 14.38 9.16
 -4 2 -3 15.44 13.23
 -4 2 -3 10.33 7.99
 4 2 3 8.33 2.84
 -4 -2 3 9.95 5.69
 4 -2 -3 19.87 9.14
 4 -2 -3 9.93 6.98
 -4 2 4 3.76 6.5
 4 -2 4 5.27 7.85
 -4 -2 -4 1.76 1.71
 4 2 -4 4.19 4.95
 4 -2 4 1.89 5.65
 4 2 4 2.86 1.33
 4 -2 -4 6.39 6.89
 -4 2 -4 -1.06 7.72
 -4 -2 4 4.59 5.63
 -4 -2 4 0.52 10.74
 -4 2 -4 10.17 7.2
 4 -2 -4 -2.34 6.37
 -4 2 5 6.26 10.56
 -4 -2 -5 10.49 7.45
 4 -2 5 5.54 8.19
 4 -2 5 -1.64 5.87
 -4 -2 -5 0.97 1.4
 4 2 -5 2.95 5.33
 -4 2 -5 -1.26 7.74
 -4 2 -5 8.89 8.28
 -4 -2 5 7.45 6.23
 -4 -2 5 -5.47 11.32
 4 -2 -5 12.85 7.2
 4 -2 -5 8.12 6.19
 -4 2 6 50.12 10.08
 4 -2 6 46.32 11.86
 -4 -2 -6 42.74 9.84
 4 2 -6 20.1 8.17
 4 -2 6 30.79 8.69
 4 -2 -6 37.32 6.59
 4 -2 -6 43.33 8.37
 -4 -2 6 31.94 8.91
 -4 2 -6 21 10.49
 -4 2 -6 27.03 11.73
 -4 -2 6 23.11 10.15
 4 2 -7 4.59 7.02
 4 -2 7 16.36 9.97
 -4 -2 -7 8.73 8.33
 4 -2 -7 4.07 5.04
 -4 -2 7 0.16 7.4
 -4 -2 7 10.62 7.74
 4 -2 -7 19.85 6.8
 -4 2 -7 -3.67 8.64
 4 -2 8 18.97 11.55
 -4 -2 -8 2.63 9.45
 4 2 -8 27.75 9.5
 -4 2 8 6.41 14.58
 -4 -2 8 22.37 9.84
 -4 2 -8 -1.76 10.67
 4 -2 -8 28.11 8.12
 -4 -2 8 27.3 9.39
 4 2 -9 36.91 10.85
 4 -2 9 27.91 13.26
 -4 -2 -9 33.26 10.06
 4 -2 -9 26.54 6.1
 -4 -2 9 33.13 9.43
 -4 -2 9 17.01 10.83
 -4 2 -9 25.68 17.31
 4 -2 -9 15.8 9.14
 -4 -2 -10 17.74 10.76
 4 -2 10 12.54 19.2
 4 2 -10 19.83 10.67
 -4 -2 10 15.87 10.85
 -4 2 -10 22.15 11.23
 4 -2 -10 18.55 4.77
 -4 -2 10 17.31 9
 4 -2 11 26.4 12.58
 -4 -2 -11 14.79 9.86
 4 2 -11 21.83 11.7
 4 2 11 14.13 3.35
 -4 -2 11 14.63 11.41
 -4 -2 11 26.47 13.26
 4 -2 -11 27.64 7.29
 -4 2 -11 28.94 12.47
 4 -2 12 9.3 11.48
 -4 -2 -12 8.98 9.05
 4 2 -12 6.53 10.24
 -4 -2 12 9.12 10.58
 4 -2 -12 10.96 6.1
 -4 2 -12 15.37 10.89
 -4 -2 12 2.12 7.76
 4 2 12 2.7 2.59
 4 2 12 -0.16 3.67
 -4 -2 -13 21.36 10.26
 4 -2 13 29.3 21.31
 4 2 -13 20.57 12
 4 -2 -13 12.51 7.43
 4 2 13 9.32 5.51
 -4 -2 13 11.52 12.69
 -4 2 -13 15.21 12.9
 -4 2 14 10.85 9.81
 4 -2 14 10.15 13.86
 -4 -2 -14 1.19 10.6
 4 2 -14 20.77 11.93
 -4 2 -14 26.22 13.19
 4 -2 -14 5.9 8.03
 4 2 14 7.61 4.23
 -4 -2 14 31.01 12.83
 4 2 -15 29.51 18.61
 4 -2 15 26.06 15.66
 -4 2 15 32.5 17.92
 4 -2 -15 24.89 6.8
 -4 2 -15 19.74 16.18
 -4 -2 15 23.11 15.53
 4 2 15 17.13 5.58
 4 2 -16 9.88 11.3
 -4 -2 -16 13.3 11.66
 4 -2 16 25.07 14.67
 -4 2 16 19.54 11.05
 -4 -2 16 27.12 22.19
 4 2 16 0.09 8.48
 -4 2 -16 10.92 14.92
 4 -2 -16 4.12 5.94
 4 2 -17 1.19 12.85
 4 -2 17 14.52 16.32
 -4 -2 -17 15.84 13.23
 -4 2 17 16.11 11.88
 4 -2 -17 11.64 10.13
 4 2 17 9.66 10.51
 -4 -2 17 57.19 22.33
 4 2 17 13.19 10.38
 -4 2 -17 20.86 16.36
 4 2 -18 6.37 12.69
 4 -2 18 12.4 24.44
 -4 -2 -18 5.18 12.38
 -4 2 18 4.66 11.52
 4 -2 -18 11.57 6.55
 4 2 18 6.84 10.92
 -4 -2 18 -0.83 22.01
 -4 2 -18 15.03 16.05
 -4 -2 -19 9.3 11.55
 4 2 -19 0.7 18.52
 4 -2 19 18.14 21.79
 -4 2 19 -1.46 16.95
 -4 -2 19 28.74 21.34
 4 -2 -19 -3.42 6.91
 -4 2 -19 2.3 14.99
 4 2 19 0.05 11.32
 4 2 -20 15.44 24.69
 4 -2 20 10.4 15.84
 -4 2 20 2.05 12.78
 -4 -2 -20 -9.84 13.03
 4 -2 -20 7.2 8.06
 -4 -2 20 17.33 25.16
 4 2 20 19.47 13.8
 -4 2 -20 -5.22 17.65
 4 2 20 11.28 13.44
 4 2 -21 22.55 20.05
 -4 2 21 24.73 24.51
 -4 -2 -21 18.52 15.69
 4 -2 21 23.5 19.69
 4 2 21 21.76 16.43
 4 -2 -21 19.94 9.77
 4 2 21 23.77 17.33
 -4 2 -21 -4.07 21.22
 -4 -2 21 49.65 30.47
 4 2 -22 10.76 21
 -4 -2 -22 21.56 15.96
 -4 2 22 14.79 15.12
 4 -2 22 19.6 20.1
 -4 -2 22 30.72 30.43
 -4 2 -22 21.61 21.58
 4 2 22 23.11 18.48
 4 -2 -22 11.28 10.15
 4 2 -23 28.65 23.54
 -4 -2 -23 33.13 18.52
 -4 2 23 41.21 17.78
 4 -2 23 32.66 22.55
 4 -2 -23 21.31 17.6
 4 2 23 9.68 13.95
 -4 2 -23 23.02 24.87
 -4 -2 23 47.02 34.1
 -4 -2 -24 -9 14.67
 4 -2 24 -6.08 17.62
 -4 2 24 -3.69 13.3
 4 2 -24 -6.03 18.66
 4 -2 -24 3.42 8.85
 4 2 24 4.5 11.05
 -4 -2 24 34.71 30.11
 -4 2 -24 -0.92 18.95
 -4 -2 -25 5.27 18.46
 4 2 -25 15.24 24.58
 4 -2 25 11.41 22.24
 -4 2 25 10.83 16.83
 4 -2 -25 2.45 11.57
 -4 -2 25 43.24 24.42
 -4 2 -25 15.75 24.1
 4 2 25 13.1 14.38
 -4 -2 -26 13.19 17.6
 -4 2 26 3.92 24.96
 4 2 -26 3.94 23.27
 4 -2 26 23.25 20.77
 4 -2 -26 -0.77 11.68
 -4 2 -26 11.5 22.73
 -4 -2 26 -14.79 23.7
 4 2 26 -2.86 13.73
 -4 -2 -27 34.19 28.13
 4 -2 27 10.33 22.19
 4 2 -27 2.81 25.3
 -4 2 27 -3.38 17.71
 4 -2 -27 6.21 12.49
 4 2 27 2.3 14.58
 -4 -2 27 3.22 24.22
 -4 2 -27 -21.49 24.73
 -4 -2 -28 -1.51 19.51
 4 2 -28 -5.18 28.65
 4 -2 28 -0.95 24.67
 -4 2 28 10.42 19.47
 4 2 28 8.33 15.55
 -4 -2 28 4.3 26.72
 4 -2 -28 11.7 20.89
 -4 2 -28 7.76 26.51
 -4 -2 -29 20.68 19.78
 4 2 -29 11.07 29.46
 -4 2 29 11.64 30.61
 4 -2 29 -2.52 25
 -4 -2 29 -3.02 26.78
 -4 2 -29 14.22 26.67
 4 -2 -29 -5.9 12.87
 -4 -2 -30 6.17 34.71
 4 -2 30 18.86 27.75
 -4 2 30 -2.25 23.25
 4 2 -30 -5.69 33.8
 -4 2 -30 34.14 46.63
 -4 -2 30 32.05 47.51
 -4 -2 -31 -12.56 21.94
 4 2 -31 8.08 34.34
 4 -2 31 15.28 28.27
 -4 2 31 14.56 22.89
 -4 2 -31 12.96 49.09
 -4 -2 31 4.59 29.46
 -4 -2 -32 12.18 24.49
 4 2 -32 15.82 37.77
 4 -2 32 60.63 49.06
 -4 2 32 -2.5 39.25
 -4 -2 32 21.52 32.81
 -4 2 -32 -24.49 35.18
 -4 -2 -33 14.54 26.31
 4 -2 33 38.87 56.85
 4 2 -33 2.61 39.27
 -4 2 33 0.74 28.34
 -4 -2 33 18.03 34.75
 -4 2 -33 14.2 36.57
 4 -2 34 -13.68 51.95
 -4 -2 -34 -30.65 39.41
 -4 2 34 5.42 25.14
 -4 -2 34 -0.97 31.33
 -4 2 -34 30.7 33.89
 -4 -2 -35 10.38 28.61
 4 -2 35 5.58 37.02
 -4 2 35 12.42 28.11
 -4 -2 35 15.42 37.05
 -4 2 -35 -3.67 38.4
 -4 2 36 41.1 46.68
 -4 -2 -36 20.17 32.97
 4 -2 36 30.36 43.24
 -4 -2 36 21.07 65.94
 -4 2 -36 20.55 44.52
 -5 -2 0 2.48 5.69
 5 -2 0 11.77 7.43
 -5 2 0 9.45 8.35
 -5 2 0 5.51 10.15
 5 2 0 1.13 5.29
 -5 -2 0 1.73 1.62
 5 -2 0 1.13 4.88
 -5 2 1 18.19 8.6
 -5 2 1 5 7.58
 5 2 -1 0.77 4.14
 5 -2 1 7.49 7.67
 -5 -2 -1 3.4 3.29
 5 -2 1 2.45 4.95
 5 2 1 3.6 3.04
 -5 2 -1 7.92 8.06
 -5 2 -1 19.02 11.37
 5 -2 -1 5.2 7.72
 5 -2 -1 3.38 7.54
 -5 -2 1 5.99 6.5
 5 -2 2 -1.42 7.22
 -5 2 2 14.38 10.83
 -5 -2 -2 2.09 2.52
 5 2 -2 -0.38 6.23
 5 -2 2 -0.47 4.84
 -5 2 2 11.97 8.62
 -5 -2 -2 1.24 1.13
 5 2 -2 -1.35 1.51
 5 2 2 2.05 1.33
 -5 -2 2 -11.86 6.71
 -5 2 -2 -3.92 7.52
 -5 2 -2 4.3 6.28
 -5 -2 2 0.36 1.37
 5 -2 -2 0.54 4.25
 5 -2 -2 3.67 6.37
 -5 2 3 1.49 7.09
 5 -2 3 0.63 7.72
 -5 -2 -3 0.52 1.24
 -5 -2 -3 0.97 3.06
 5 2 -3 -0.9 4.46
 -5 2 3 0.99 5.15
 5 -2 3 -1.13 5.09
 5 2 -3 1.04 0.99
 5 2 3 1.53 1.35
 5 -2 -3 -13.44 10.98
 -5 2 -3 9.05 8.03
 -5 -2 3 6.41 7.45
 5 2 3 0.23 0.56
 5 -2 -3 -1.06 4.34
 -5 -2 3 1.08 1.35
 -5 2 -3 3.47 6.75
 -5 -2 -4 21.34 8.96
 5 -2 4 23.95 11.23
 -5 -2 -4 19.51 3.26
 -5 -2 -4 17.31 2.72
 5 -2 4 25.25 7.18
 5 2 -4 10.76 6.53
 -5 2 -4 20.57 9.77
 5 -2 -4 31.17 5.63
 -5 -2 4 25.54 13.77
 -5 -2 4 18.88 11.12
 5 -2 -4 24.35 8.85
 5 2 -5 3.38 6.05
 5 -2 5 7.4 9
 -5 -2 -5 19.42 7.76
 5 -2 5 4.12 6.17
 -5 -2 5 0.29 7.58
 -5 2 -5 -1.08 7.94
 5 -2 -5 0.18 5.06
 -5 -2 5 8.21 10.15
 5 -2 -5 16.07 7.45
 5 -2 6 65.83 13.8
 5 2 -6 53.03 15.15
 -5 -2 -6 55.82 12.04
 5 -2 -6 67.27 6.64
 -5 2 -6 61.22 12.92
 -5 -2 6 58.09 11.19
 -5 -2 6 68.8 12.24
 5 -2 -6 65.52 10.67
 5 -2 7 176.72 20.53
 -5 -2 -7 181.63 18.5
 -5 -2 7 160.29 17.31
 -5 2 -7 175.37 26.78
 5 -2 -7 181.07 16.25
 -5 -2 7 176.09 17.69
 5 -2 -7 189.84 15.35
 -5 -2 -8 40.31 17.53
 5 -2 8 62.07 21.04
 -5 2 -8 45.19 12.47
 -5 -2 8 36.01 10.11
 5 -2 -8 49.85 9.66
 5 -2 -8 45.06 10.96
 -5 -2 8 38.62 11.46
 5 -2 9 179.65 22.73
 -5 -2 -9 161.08 19.85
 -5 -2 9 201.23 19.36
 -5 -2 9 155.48 18.91
 -5 2 -9 155.99 20.66
 5 -2 -9 184.78 10.96
 5 -2 -9 182.64 18.16
 5 -2 10 65.56 22.98
 5 2 -10 58.04 11.82
 -5 -2 -10 57.46 19.9
 -5 -2 10 52.13 12.92
 5 -2 -10 39.03 4.97
 -5 2 -10 41.5 13.98
 -5 -2 10 40.11 11.14
 5 2 -11 154.62 27.66
 -5 -2 -11 155.21 19.76
 5 -2 11 184.06 23.38
 -5 2 -11 180.55 21.65
 -5 -2 11 162 16.47
 -5 -2 11 144.65 21.18
 5 -2 -11 156.17 11.34
 5 -2 12 6.95 11.48
 -5 -2 -12 9.97 8.82
 5 2 -12 12.42 9.18
 -5 2 -12 -11.23 11.03
 -5 -2 12 0.52 7.25
 -5 -2 12 9.45 10.04
 5 2 12 -0.14 2.36
 5 -2 -12 1.08 3.22
 -5 -2 -13 18.07 10.33
 5 2 -13 26.15 17.53
 5 -2 13 7.4 20.75
 5 -2 -13 9.75 4.03
 -5 2 -13 11.82 20.23
 -5 -2 13 -3.53 17.71
 5 2 13 4.21 5
 -5 2 -13 6.46 17.83
 5 -2 14 49.69 18.84
 -5 -2 -14 58.36 15.15
 5 2 -14 60.99 16.74
 -5 2 14 58.18 14.58
 -5 -2 14 64.01 27.55
 5 2 14 48.57 8.73
 5 -2 -14 54.58 6.62
 -5 2 -14 52.42 17.31
 -5 2 15 12.06 12.22
 5 -2 15 31.42 15.87
 -5 -2 -15 11.7 20.59
 -5 -2 -15 19.47 6.55
 5 2 -15 18.43 14.22
 5 -2 -15 19.02 5.27
 -5 -2 15 14.45 15.82
 5 2 15 11.61 7.63
 -5 2 -15 15.26 14.52
 -5 -2 -16 14.27 7.47
 -5 -2 -16 28.85 14.11
 -5 2 16 17.29 13.21
 5 -2 16 21.02 16.18
 5 2 -16 38.35 21.74
 5 2 16 13.93 5.6
 -5 -2 16 13.23 16.2
 -5 2 -16 15.28 14.63
 5 -2 -16 16.88 8.48
 -5 2 17 3.62 12.02
 -5 -2 -17 12.96 12.4
 -5 -2 -17 0.65 7.04
 5 -2 17 15.98 14.72
 5 2 -17 -6.98 13.08
 5 -2 -17 2.63 5.22
 -5 -2 17 1.69 15.21
 5 2 17 6.3 7.31
 -5 2 -17 8.69 13.86
 -5 -2 -18 3.87 8.78
 5 -2 18 8.64 24.51
 -5 2 18 -0.74 12.47
 -5 -2 -18 -2.7 12.38
 5 2 -18 -0.79 13.86
 5 -2 -18 15.15 6.21
 5 2 18 5.31 5.72
 -5 -2 18 4.75 17.04
 -5 2 -18 15.55 14.54
 -5 2 19 6.1 12.85
 5 -2 19 18.07 16.86
 -5 -2 -19 0.83 13.26
 -5 -2 -19 7.29 9.43
 5 2 -19 21.16 21.67
 5 2 19 -1.8 6.75
 5 -2 -19 12.72 10.22
 -5 2 -19 7.27 15.62
 -5 -2 19 6.21 17.58
 5 2 -20 7.92 21.65
 5 -2 20 11.64 19.36
 -5 -2 -20 5.6 14.47
 -5 2 20 9.95 22.66
 -5 -2 -20 18.01 11.14
 5 -2 -20 9.21 7.52
 5 2 20 8.64 12.58
 -5 -2 20 2.09 29.82
 -5 2 -20 17.33 17.56
 5 2 -21 36.82 19.04
 -5 -2 -21 45.89 19.15
 -5 2 21 54.42 19.94
 5 -2 21 46.79 24.78
 5 2 21 46.61 17.85
 -5 -2 21 104.97 57.05
 -5 2 -21 67.88 35.63
 5 -2 -21 43.05 15.93
 5 2 -22 20.19 17.98
 -5 -2 -22 24.17 17.83
 5 -2 22 29.87 23.34
 -5 2 22 20.91 28.52
 -5 -2 22 34.55 34.62
 5 -2 -22 21.38 9.95
 5 2 22 41.14 18.7
 -5 2 -22 42.67 37.65
 5 2 -23 16.2 17.19
 -5 2 23 16.52 16.68
 -5 -2 -23 2.03 16.68
 5 -2 23 12.38 22.3
 5 -2 -23 10.42 9.23
 -5 -2 23 40.76 31.76
 -5 2 -23 -13.41 35.4
 5 2 23 9.99 18.75
 5 2 -24 1.82 16.54
 -5 -2 -24 4.52 16.54
 5 -2 24 14.38 21.18
 -5 2 24 3.24 15.51
 5 2 24 -4.57 18.82
 -5 2 -24 6.75 21.38
 5 -2 -24 1.91 9.59
 -5 -2 24 5.18 30.92
 -5 -2 -25 21.7 20.44
 5 2 -25 5.27 20.53
 5 -2 25 33.62 25.39
 -5 2 25 12.92 28.94
 -5 2 -25 33.89 25.63
 5 2 25 17.31 23.74
 5 -2 -25 8.24 11.46
 -5 -2 25 -6.19 37.43
 5 2 -26 26.63 21.29
 -5 -2 -26 12.67 19.65
 5 -2 26 11.68 26.06
 -5 2 26 3.87 18.43
 -5 -2 26 7.65 36.55
 5 2 26 13.5 22.55
 5 -2 -26 -6.32 18.34
 -5 2 -26 18.12 26.4
 5 2 -27 16.47 21.88
 -5 -2 -27 14.04 30.61
 5 -2 27 12.36 26.11
 -5 2 27 -2.72 18.82
 -5 -2 27 25.41 41.59
 -5 2 -27 9.09 27.14
 5 -2 -27 3.78 11.59
 5 2 -28 11.61 26.81
 -5 -2 -28 24.33 23.65
 5 -2 28 20.68 30.97
 -5 2 28 14.92 23.83
 -5 -2 28 19.31 32
 -5 2 -28 33.76 30.41
 5 2 -29 5.78 26.31
 -5 -2 -29 1.87 21.52
 -5 2 29 11.79 22.21
 5 -2 29 1.76 29.55
 -5 -2 29 4.01 29.46
 -5 2 -29 16.05 29.55
 5 -2 30 7.43 32.39
 5 2 -30 18.37 28.63
 -5 -2 -30 -0.34 23.81
 -5 2 30 8.96 24.4
 -5 -2 30 13.93 32.61
 -5 2 -30 21.09 32.61
 -5 -2 -31 13.28 24.89
 5 2 -31 10.89 31.35
 -5 2 31 17.24 26.69
 5 -2 31 -5.9 33.89
 -5 2 -31 9.57 33.89
 -5 -2 31 15.17 33.87
 5 -2 32 8.53 37.18
 -5 2 32 2.81 28.58
 -5 -2 -32 22.33 27.46
 -5 -2 32 17.96 36.8
 -5 2 -32 37.47 57.46
 5 -2 33 -1.94 36.93
 -5 2 33 19.54 27.73
 -5 -2 -33 2.5 27.46
 -5 2 -33 29.28 58.85
 -5 -2 33 21.67 55.28
 -5 -2 -34 -7.76 42.67
 5 -2 34 17.47 37.05
 -5 2 34 12.04 45.78
 -5 -2 34 5.33 37.2
 -5 2 -34 19.92 38.71
 5 -2 35 13.35 39.3
 -5 -2 -35 11.59 30.99
 -5 2 35 21.11 30.41
 -5 -2 35 -12.47 38.89
 -5 2 -35 28.79 40.65
 6 -2 0 22.8 9.57
 -6 -2 0 18.73 4.82
 -6 2 0 11.52 13.23
 6 -2 0 17.85 5.6
 6 -2 1 7.99 9.03
 -6 -2 -1 3.67 3.76
 6 -2 1 5 5.22
 6 -2 -1 9.25 4.59
 -6 -2 1 7.61 4.82
 6 -2 -1 7.85 12.65
 -6 2 -1 3.83 7
 -6 -2 -2 4.3 3.2
 6 -2 2 2.39 9.03
 6 2 -2 9.27 4.97
 -6 -2 -2 1.01 2.07
 6 -2 2 7.63 5.18
 -6 -2 -2 -1.6 3.56
 -6 2 2 -1.58 9.48
 -6 2 -2 12.18 7
 6 -2 -2 4.39 4.14
 -6 -2 2 14.45 5
 6 -2 -2 10.04 7.83
 6 -2 3 7.29 10.02
 6 2 -3 12.4 6.23
 -6 -2 -3 15.87 3.08
 -6 -2 -3 14.97 3.22
 -6 2 3 8.24 6.64
 6 -2 3 12.87 6.46
 -6 -2 -3 28.76 8.76
 -6 -2 3 18.43 6.37
 -6 2 -3 13.35 13.46
 6 -2 -3 14.83 4.86
 6 -2 -3 18.39 9.7
 -6 2 4 4.59 8.28
 6 -2 4 17.8 9.45
 -6 -2 -4 4.32 2.36
 6 2 -4 8.48 9.84
 -6 -2 -4 5.13 3.58
 6 -2 4 15.89 9.43
 -6 -2 -4 2.27 7.85
 6 -2 -4 3.29 6.55
 -6 -2 4 8.42 9.61
 -6 2 -4 5.04 7.65
 6 -2 -4 2.77 8.06
 -6 -2 -5 17.87 3.53
 6 2 -5 20.39 8.03
 6 -2 5 5.87 12.36
 -6 -2 -5 21.11 9.39
 6 -2 -5 20.28 13.8
 -6 -2 5 19.54 12.65
 -6 -2 5 22.78 9.21
 6 -2 -5 21.74 7.22
 -6 2 -5 27.71 9.7
 6 -2 6 132.61 20.35
 -6 -2 -6 122.3 4.73
 -6 -2 -6 144.6 4.79
 -6 -2 -6 137.63 15.64
 -6 2 -6 145.21 16.02
 6 -2 -6 139.59 8.57
 -6 -2 6 138.42 14.94
 -6 -2 6 143.7 16.18
 6 -2 -6 125.54 14.94
 6 -2 7 31.76 12.29
 -6 -2 -7 11.32 10.26
 6 -2 -7 23.09 7.18
 -6 -2 7 17.19 9.43
 6 -2 -7 28.83 9.32
 -6 2 -7 19.18 10.49
 -6 -2 7 18.21 10.26
 6 -2 8 18.77 13.03
 -6 -2 -8 27.19 10.98
 6 -2 -8 25.39 7.88
 6 -2 -8 17.35 10.29
 -6 2 -8 33.42 11.59
 -6 -2 8 26.67 10.76
 -6 -2 8 15.66 10.04
 -6 -2 -9 20.75 11.52
 6 -2 9 30.86 13.37
 -6 2 -9 28.97 12.13
 -6 -2 9 27.66 9.43
 -6 -2 9 33.38 11.66
 6 -2 -9 22.15 10.87
 6 -2 -9 27.32 7.85
 6 -2 10 -0.65 11.03
 -6 -2 -10 1.33 9.39
 -6 2 -10 15.17 14.56
 -6 -2 10 7.61 8.76
 -6 -2 10 2.45 9.99
 6 -2 -10 0.5 4.28
 6 -2 -10 3.74 4.1
 -6 -2 -11 -2.88 10.02
 6 -2 11 21.45 11.79
 6 -2 -11 3.49 4.19
 6 -2 -11 1.8 2.77
 -6 2 -11 -0.43 9.97
 -6 -2 11 11.82 8.08
 -6 -2 11 18.32 15.93
 -6 -2 -12 50.26 3.04
 6 -2 12 54.8 17.49
 -6 -2 -12 50.98 14.76
 6 -2 -12 45.8 6.17
 -6 -2 12 54.04 11.79
 6 -2 -12 42.22 9.7
 -6 2 -12 41.93 15.37
 -6 -2 12 50.71 15.53
 -6 -2 -13 113.23 6.19
 6 -2 13 101.44 22.28
 6 2 -13 87.51 16.95
 -6 -2 -13 88.5 18.07
 -6 -2 13 94.01 14.13
 6 -2 -13 101.68 6.59
 -6 -2 13 113.46 20.86
 -6 2 -13 99.21 19.58
 -6 -2 -14 2.7 19.76
 6 2 -14 21.43 18.41
 6 -2 14 24.69 15.53
 -6 -2 -14 18.55 4.55
 6 2 14 11.86 5.11
 -6 -2 14 14.97 14
 6 -2 -14 10.35 4.03
 -6 2 -14 13.82 14.02
 -6 -2 -15 6.84 4.82
 -6 -2 -15 -10.74 12.11
 6 -2 15 3.83 13.35
 6 2 -15 -7.31 10.94
 -6 2 15 5.54 11.12
 -6 2 -15 -15.42 12.31
 -6 -2 15 8.96 12.99
 6 -2 -15 3.69 3.56
 6 2 15 0 3.44
 -6 2 16 31.24 16.32
 6 -2 16 59.98 20.68
 -6 -2 -16 40.38 18.28
 6 2 -16 52.82 17.04
 -6 -2 -16 54.15 8.44
 6 2 16 46.45 7.43
 -6 2 -16 39.27 19.58
 -6 -2 16 42.78 20.14
 6 -2 -16 45.06 9.81
 -6 -2 -17 8.6 7.09
 -6 -2 -17 6.64 21.74
 -6 2 17 6.05 13.64
 6 2 -17 9 14.18
 6 -2 17 -0.2 16.5
 6 2 17 -0.9 9.9
 -6 -2 17 18.03 23.97
 -6 2 -17 6.86 15.64
 6 -2 -17 8.64 7.65
 6 -2 18 -8.1 23.23
 -6 -2 -18 4.46 12.2
 -6 2 18 1.6 12.54
 6 2 -18 16.9 13.21
 -6 -2 -18 -2.79 6.98
 6 -2 -18 3.44 4.7
 6 2 18 -2.61 6.48
 -6 -2 18 13.1 24.15
 6 -2 -18 0.83 1.17
 -6 2 -18 -7.38 14.47
 6 -2 19 17.35 16.43
 -6 2 19 -7.47 13.14
 6 2 -19 9.34 14.36
 -6 -2 -19 1.37 13.48
 -6 -2 -19 -7.11 8.24
 6 -2 -19 4.79 8.28
 6 2 19 4.01 10.83
 -6 -2 19 1.69 17.6
 -6 2 -19 17.92 15.71
 -6 2 20 30.05 17.01
 6 -2 20 31.89 20.64
 -6 -2 -20 19.33 27.14
 -6 -2 -20 25.41 7.52
 6 2 -20 36.96 28.52
 6 -2 -20 9.93 7.54
 6 2 20 17.35 8.96
 -6 2 -20 28.76 20.35
 -6 -2 20 27.48 22.06
 -6 -2 -21 -2.52 14.74
 6 -2 21 23.86 19.38
 -6 2 21 20.66 24.67
 6 2 -21 2.68 16.52
 6 -2 -21 2.32 11.1
 6 2 21 4.97 7.97
 -6 -2 21 19.29 20.75
 -6 2 -21 8.15 18.75
 -6 -2 -22 137.4 27.75
 6 -2 22 150.5 34.89
 -6 2 22 171.34 29.28
 6 2 -22 119.42 29.48
 6 2 22 126.69 23.23
 -6 -2 22 136.86 37.18
 -6 2 -22 144.92 32.95
 6 -2 -22 84.51 15.3
 -6 -2 -23 -1.62 17.17
 -6 2 23 15.6 27.66
 6 -2 23 11.23 21.58
 6 2 -23 2.95 17.51
 6 2 23 16.88 14.94
 6 -2 -23 8.35 13.55
 -6 -2 23 -22.57 35.79
 -6 2 -23 6.08 20.64
 -6 -2 -24 17.51 21.9
 6 -2 24 17.69 25.32
 -6 2 24 17.13 19.67
 6 2 -24 22.91 20.95
 6 2 24 28.43 12.81
 -6 -2 24 10.31 38.8
 -6 2 -24 56.38 24.6
 6 -2 -24 11.28 10.06
 -6 -2 -25 28.34 19
 -6 2 25 9.88 17.96
 6 -2 25 7.58 23.02
 6 2 -25 -0.63 18.61
 6 2 25 -0.72 12.15
 -6 -2 25 8.12 34.3
 6 -2 -25 -0.72 8.96
 -6 2 -25 34.25 38.69
 -6 -2 -26 -11.16 19.13
 -6 2 26 4.52 27.55
 6 -2 26 7.49 23.43
 6 2 -26 6.03 19.38
 -6 2 -26 20.8 23.9
 -6 -2 26 -21.09 34.05
 -6 -2 -27 -1.69 32.86
 6 -2 27 14.27 27.12
 -6 2 27 10.85 20.62
 6 2 -27 0.18 23.36
 -6 2 -27 19.96 28.27
 -6 -2 27 6.03 39.99
 -6 -2 -28 19.65 23.77
 6 -2 28 18.03 31.33
 -6 2 28 12.87 23.25
 6 2 -28 7.25 42.85
 -6 2 -28 14.36 32.52
 -6 -2 28 37.97 44.09
 -6 -2 -29 4.21 21.9
 6 -2 29 -1.91 27.95
 -6 2 29 14.63 35.49
 6 2 -29 11.34 40.53
 -6 2 -29 -3.89 30.02
 -6 -2 29 21.29 63.51
 -6 -2 -30 0.61 23.52
 6 -2 30 -8.01 30.07
 -6 2 30 2.3 23.7
 -6 -2 30 7.67 31.19
 -6 2 -30 23.38 31.13
 6 -2 31 5.15 34.86
 -6 2 31 4.68 27.28
 -6 -2 -31 13.77 41.03
 -6 -2 31 22.66 35.25
 -6 2 -31 19.02 35.9
 6 -2 32 1.96 36.64
 -6 -2 -32 4.91 28.25
 -6 2 32 19.47 45.73
 -6 -2 32 36.75 37.29
 -6 2 -32 17.15 37.83
 -6 -2 -33 13.05 28.79
 -6 2 33 8.24 29.91
 6 -2 33 25.12 37.34
 -6 2 -33 21.85 38.69
 -6 -2 33 -6.23 38.35
 -6 -2 -34 5.11 27.62
 6 -2 34 34.12 36.28
 -6 2 34 -6.57 28.4
 -6 -2 34 -16.99 37.36
 -6 2 -34 50.21 57.46
 6 -2 35 -5.51 38.44
 -6 2 35 26.4 46.97
 -6 -2 -35 13.95 30.65
 -6 2 -35 2.52 42
 -6 -2 35 37.29 60.16
 7 -2 0 9.66 13.68
 -7 -2 0 1.58 1.24
 -7 -2 0 5.6 4.48
 7 -2 0 -3.29 6.95
 -7 2 0 5.49 6.35
 7 2 0 0.52 1.22
 7 -2 1 21.74 10.92
 7 -2 1 21.79 6.71
 -7 2 1 24.89 8.33
 -7 -2 -1 10.8 8.08
 -7 -2 -1 12.42 4.97
 -7 -2 -1 28.88 8.87
 -7 -2 1 17.19 6.35
 -7 2 -1 21.83 8.39
 7 -2 -1 19.76 5.33
 7 -2 -1 28.34 10.44
 7 -2 2 3.44 9.39
 -7 -2 -2 7.38 6.55
 7 -2 2 -0.29 6.05
 -7 -2 -2 1.01 7.97
 -7 -2 -2 3.47 3.8
 -7 2 -2 21.88 12.13
 -7 -2 2 11.46 5.94
 7 -2 -2 16.02 9.48
 7 -2 -2 3.8 4.14
 7 -2 3 84.62 22.96
 7 -2 3 74.7 11.25
 -7 -2 -3 79.38 6.62
 -7 -2 -3 78.93 9.23
 -7 -2 -3 79.13 13.03
 -7 2 3 87.55 10.38
 7 -2 -3 111.41 23.18
 -7 2 -3 94.71 12.81
 -7 -2 3 76.43 15.53
 7 -2 -3 81.99 7.07
 7 -2 4 44.74 13.44
 -7 -2 -4 33.04 17.44
 -7 -2 -4 39.21 4.73
 -7 2 4 43.93 11.93
 -7 -2 -4 37.29 7.16
 -7 -2 4 42.4 9.07
 -7 2 -4 30.34 11.03
 7 -2 -4 38.33 11.97
 7 -2 -4 35.22 5
 -7 -2 -5 13.53 3.13
 -7 -2 -5 12.56 4.64
 -7 2 5 6.89 5.36
 7 -2 5 11.25 11.39
 -7 -2 -5 21.18 9.25
 7 -2 -5 5.29 9.72
 -7 -2 5 5.67 8.1
 -7 2 -5 17.87 9.27
 7 -2 -5 8.15 5.6
 7 -2 6 1.64 9.72
 -7 -2 -6 5.9 3.47
 -7 -2 -6 3.92 2.68
 -7 -2 -6 11.86 13.35
 7 -2 -6 1.64 12.96
 -7 2 -6 5.63 8.8
 -7 -2 6 0.07 7.54
 -7 -2 6 9.57 8.03
 7 -2 -6 -1.85 3.02
 -7 -2 -7 2.59 3.11
 7 -2 7 12.42 11.34
 -7 -2 -7 -10.62 8.91
 -7 -2 -7 2.36 2.54
 -7 2 -7 7.02 9.16
 -7 -2 7 7.2 8.15
 7 -2 -7 5.33 8.82
 7 -2 -7 0.74 3.04
 -7 -2 7 -2.03 12.69
 7 -2 8 101.17 20.37
 -7 -2 -8 103.17 5.11
 -7 -2 -8 82.35 16.65
 -7 -2 -8 93.72 4.64
 -7 2 -8 91.08 26.2
 7 -2 -8 103.87 8.46
 -7 -2 8 98.69 15.44
 7 -2 -8 117.12 16.56
 -7 2 -8 87.19 23.11
 -7 -2 8 120.36 22.51
 7 -2 9 -3.11 11.77
 -7 -2 -9 8.1 9.66
 -7 -2 -9 4.23 1.6
 -7 -2 -9 7.09 1.76
 -7 2 9 0.74 1.55
 -7 -2 9 -1.71 7.74
 -7 -2 9 -1.94 15.51
 7 -2 -9 10.76 4.97
 7 -2 -9 12.94 9.66
 -7 2 -9 -2.79 9.81
 7 -2 10 80.55 18.19
 -7 -2 -10 61.47 15.91
 -7 -2 10 67.25 21.18
 7 -2 -10 84.13 7.74
 -7 -2 10 58.79 16.59
 7 -2 -10 60.95 5.33
 -7 2 -10 62.84 16.25
 -7 -2 -11 1.87 14.88
 7 2 -11 0.9 0.99
 7 -2 11 -2.66 11.68
 -7 -2 -11 1.76 1.42
 -7 -2 11 7 7.74
 7 -2 -11 0.7 1.96
 7 -2 -11 2.03 3.26
 -7 -2 11 3.06 10.51
 -7 2 -11 3.26 9.77
 7 -2 12 18.3 13.91
 -7 -2 -12 15.12 12.2
 -7 -2 -12 9.34 2.36
 -7 -2 12 11.41 13.91
 7 -2 -12 9.99 2.59
 -7 -2 12 16.05 12.83
 -7 2 -12 9.79 12.29
 7 -2 -12 8.06 5.83
 7 -2 13 12.49 12.31
 -7 -2 -13 22.26 10.83
 -7 -2 -13 -0.09 2.68
 -7 -2 13 2.27 11.93
 7 -2 -13 0.83 3.42
 7 -2 -13 -0.09 3.53
 -7 2 -13 7.36 11.37
 7 2 13 1.53 2.36
 -7 -2 13 5.92 11.7
 7 -2 14 10.74 14.36
 -7 -2 -14 0.34 13.37
 7 2 14 6.5 3.51
 7 -2 -14 5.24 4.12
 7 -2 -14 2.39 4.32
 -7 -2 14 -17.42 20.44
 -7 2 -14 15.28 13.21
 -7 2 15 41.34 16.74
 -7 -2 -15 28 4.19
 7 -2 15 53.77 18.84
 -7 -2 -15 37.77 17.35
 7 2 15 31.37 5.92
 7 -2 -15 29.66 6.14
 -7 -2 15 41.73 18.84
 7 -2 -15 24.69 8.87
 -7 2 -15 47.56 17.98
 7 -2 16 34.1 17.71
 -7 2 16 28.52 15.48
 -7 -2 -16 25.7 16.25
 -7 -2 -16 13.46 4.1
 7 2 -16 19.85 12.92
 7 2 16 17.49 7.38
 7 -2 -16 10.67 6.08
 -7 2 -16 10.49 16.43
 -7 -2 16 24.37 17.78
 7 -2 17 18.61 23.09
 -7 -2 -17 -2.09 12.87
 -7 2 17 -5.49 20.95
 7 2 -17 14.52 11.43
 -7 -2 -17 -1.22 5.83
 7 -2 -17 1.26 3.6
 7 2 17 -0.2 6.48
 -7 -2 17 4.28 15.33
 -7 2 -17 2.25 14.38
 7 -2 18 2.72 27.59
 -7 -2 -18 12.65 14.92
 -7 2 18 8.44 16.14
 -7 -2 -18 11.07 7.83
 7 2 -18 3.96 21.83
 7 2 18 8.26 8.87
 -7 -2 18 20.64 17.83
 7 -2 -18 3.33 7.54
 -7 2 -18 -1.87 17.74
 -7 -2 -19 66.6 9.39
 -7 -2 -19 46.79 23.14
 7 2 -19 109.76 22.44
 -7 2 19 87.06 36.35
 7 -2 19 94.84 27.26
 7 -2 -19 54.78 8.89
 -7 -2 19 92.25 28.09
 7 2 19 75.73 10.92
 -7 2 -19 67.77 25.93
 -7 2 20 -5.2 14.97
 7 -2 20 -4.14 18.19
 -7 -2 -20 16.86 22.8
 7 2 -20 13.98 15.01
 7 2 20 7.56 12.45
 -7 -2 20 3.71 27.21
 -7 2 -20 13.39 18.03
 7 -2 -20 -3.29 8.19
 -7 -2 -21 4.79 16.43
 7 -2 21 24.94 20.01
 7 2 -21 -4.12 26.04
 -7 2 21 19.29 17.33
 -7 -2 21 2.27 21.76
 7 2 21 8.55 10.04
 7 -2 -21 1.42 6.26
 -7 2 -21 30.74 19.31
 -7 2 22 31.49 20.73
 -7 -2 -22 29.42 19.6
 7 -2 22 33.74 24.35
 7 2 -22 30.83 20.98
 7 2 22 4.57 19.45
 -7 -2 22 23.88 25.32
 -7 2 -22 1.85 23.79
 7 -2 -22 12.24 11.93
 -7 -2 -23 5.67 28.07
 7 -2 23 7.09 22.51
 -7 2 23 31.01 18.23
 7 2 -23 4.28 19.31
 -7 2 -23 22.39 21.4
 7 2 23 2.12 18.3
 -7 -2 23 3.89 23.45
 7 -2 -23 0.7 7.54
 -7 -2 -24 -7.25 21.9
 -7 2 24 5.92 33.62
 7 -2 24 25.77 25.05
 7 2 -24 5.99 21.4
 -7 -2 24 40.89 27.01
 -7 2 -24 17.83 25.36
 -7 2 25 19.99 22.12
 -7 -2 -25 6.35 23.52
 7 -2 25 36.12 43.1
 7 2 -25 20.64 23.32
 -7 -2 25 12.27 28.88
 -7 2 -25 16.16 27.03
 7 2 -26 11.34 23.16
 -7 -2 -26 17.26 23.86
 7 -2 26 22.91 44.7
 -7 2 26 16.79 22.46
 -7 -2 26 40.56 65.38
 -7 2 -26 2.9 27.26
 -7 -2 -27 -18.46 32.93
 -7 2 27 -3.74 32.43
 7 -2 27 5.56 41.84
 7 2 -27 -24.76 20.8
 -7 2 -27 21.94 41.7
 -7 -2 27 42.29 37.52
 -7 2 -27 11.12 39.36
 -7 -2 -28 13.5 26.69
 -7 2 28 32.79 25.79
 -7 2 -28 4.32 35.47
 -7 -2 28 36.21 48.75
 -7 -2 -29 -28.99 26.4
 -7 2 29 0.38 25.72
 -7 2 -29 -6.39 34.71
 -7 -2 29 -39.32 48.61
 -7 2 30 21.11 44.61
 -7 -2 -30 21.16 27.44
 -7 -2 30 2.45 51.34
 -7 2 -30 8.55 36.12
 7 -2 31 -2.86 55.79
 -7 -2 -31 29.87 41.86
 -7 2 31 -5.24 27.64
 -7 2 -31 15.98 35.81
 -7 -2 31 43.96 75.35
 -7 2 32 1.08 29.06
 -7 -2 -32 21.52 28.13
 7 -2 32 7.7 58.16
 -7 -2 32 -0.95 37.16
 -7 2 -32 15.08 38.22
 -7 2 33 28.92 40.11
 -7 -2 -33 -6.57 24.8
 7 -2 33 23.59 49.6
 -7 2 -33 5.33 33.87
 -7 -2 33 -27.21 32.81
 -7 -2 -34 2.84 26.36
 7 -2 34 -19.54 33.94
 -7 2 34 -7.67 27.48
 -7 -2 34 30.86 35.72
 -7 2 -34 10.02 35.47
 8 -2 0 -1.67 5.04
 8 -2 0 -7.65 9.09
 -8 2 0 -1.24 6.57
 -8 -2 0 0.43 5.6
 -8 -2 0 -1.44 5.18
 -8 -2 0 0.45 7.16
 8 -2 1 10.08 6.37
 -8 -2 -1 14.2 5.54
 -8 -2 -1 7.94 6.05
 -8 2 1 6.57 7.36
 8 -2 1 14.58 17.35
 -8 -2 -1 7.16 13.21
 8 -2 -1 13.08 8.37
 -8 2 -1 17.87 8.46
 -8 -2 1 10.47 7.16
 -8 -2 1 5.33 7.49
 8 -2 -1 23.86 11.01
 8 -2 2 -11.46 9.88
 8 -2 2 6.1 5.96
 8 2 -2 1.96 1.35
 -8 2 2 1.89 6.77
 -8 -2 -2 5.85 7.2
 -8 -2 -2 1.4 4.3
 -8 -2 -2 3.11 7.74
 -8 -2 2 1.13 10.22
 -8 2 -2 4.68 7.38
 8 -2 -2 -0.29 7.02
 8 -2 -2 11.84 9.61
 8 -2 3 14.16 9.18
 -8 2 3 0.05 5.11
 8 2 -3 0.7 1.26
 -8 -2 -3 -7.99 11.34
 -8 -2 -3 2.68 6.41
 -8 -2 -3 0.2 3.98
 8 -2 -3 1.51 3.96
 -8 -2 3 -0.77 6.28
 -8 -2 3 0.23 1.1
 -8 2 -3 8.76 7.49
 8 -2 -3 0.18 9
 8 -2 4 18.01 10.2
 -8 -2 -4 7.31 8.35
 -8 -2 -4 0.05 3.89
 -8 -2 -4 2.45 3.69
 -8 2 4 10.24 8.71
 8 -2 -4 0.47 3.96
 -8 2 -4 7.04 8.33
 8 -2 -4 31.76 14.88
 -8 -2 4 -2.54 7.34
 -8 -2 -5 13.14 4.5
 8 -2 5 25.86 12.51
 -8 -2 -5 21.49 15.39
 -8 -2 -5 11.97 6.48
 -8 2 5 13.98 5.87
 8 -2 -5 13.86 4.14
 -8 -2 5 16.16 9.21
 -8 2 -5 14.81 10.38
 8 -2 -5 8.3 10.51
 8 -2 6 -6.1 17.76
 -8 -2 -6 -1.22 5.38
 -8 -2 -6 6.57 3.42
 -8 -2 -6 4.39 9.7
 8 -2 -6 8.1 5.15
 -8 2 -6 13.5 9.9
 -8 -2 6 7.36 8.91
 -8 -2 6 5.69 9.34
 8 -2 -6 18.55 10.24
 8 -2 7 2.43 10.71
 -8 2 7 0.79 0.59
 8 2 -7 -0.23 1.01
 -8 -2 -7 0.59 2.88
 -8 -2 -7 -1.01 8.98
 -8 -2 -7 1.85 3.87
 8 -2 -7 4.52 3.85
 -8 -2 7 2.07 8.17
 -8 -2 7 -1.33 13.05
 8 -2 -7 7.04 9.34
 -8 2 -7 2.88 13.14
 8 -2 8 3.29 16.61
 -8 -2 -8 0.88 3.96
 -8 -2 -8 3.8 8.78
 -8 -2 -8 -0.77 3.42
 8 -2 -8 15.46 9.43
 -8 -2 8 6.12 8.87
 -8 -2 8 -1.78 8.26
 -8 2 -8 13.66 8.87
 8 -2 -8 -3.04 3.04
 8 -2 9 16.05 13.41
 -8 -2 -9 5.99 9.95
 -8 -2 -9 4.41 4.01
 -8 -2 9 3.15 10.29
 8 -2 -9 10.26 10.92
 -8 2 -9 15.35 10.24
 8 -2 -9 1.1 2.63
 -8 -2 9 6.66 9.16
 8 -2 10 7.02 15.39
 -8 -2 -10 7.38 3.8
 -8 -2 -10 34.62 17.78
 -8 -2 10 14.43 8.96
 -8 -2 10 4.1 11.79
 -8 2 -10 18.88 11.64
 -8 -2 -11 0.36 2.61
 -8 -2 -11 0.7 10.15
 8 2 -11 0.72 0.97
 8 -2 11 6.23 11.84
 -8 -2 11 -4.48 8.71
 8 -2 -11 0.11 0.74
 -8 -2 11 -10.58 10.58
 -8 2 -11 14.97 10.17
 8 -2 -11 0.02 1.13
 8 -2 12 6.84 14.61
 -8 -2 -12 12.99 12.38
 -8 -2 -12 6.73 3.47
 -8 -2 12 22.89 21.31
 -8 -2 12 16.02 9.07
 -8 2 -12 11.14 12.94
 8 -2 13 -4.77 13.95
 -8 -2 -13 24.67 20.37
 -8 -2 -13 2.07 3.33
 -8 2 -13 5.83 12.85
 -8 -2 13 19.38 13.37
 -8 -2 13 0.74 8.53
 8 -2 14 6.46 15.73
 -8 -2 -14 7.02 15.17
 -8 -2 -14 9.48 3.87
 -8 2 -14 10.62 14.31
 -8 -2 14 3.33 15.78
 8 2 14 6.62 4.05
 -8 -2 -15 -8.51 14.54
 8 -2 15 13.84 15.1
 -8 -2 -15 5.11 3.04
 -8 2 -15 13.19 15.01
 -8 -2 15 15.06 15.69
 8 2 15 6.23 2.9
 -8 2 16 12.51 14.11
 -8 -2 -16 22.26 22.98
 8 -2 16 17.51 15.03
 -8 -2 -16 3.8 3.42
 8 2 16 3.31 5.27
 8 -2 -16 1.87 3.15
 -8 2 -16 11.1 15.12
 -8 -2 16 11.46 16.05
 -8 -2 -17 -8.19 14.36
 8 -2 17 38.13 23.09
 -8 2 17 3.2 14.49
 -8 -2 -17 0.11 5.76
 8 2 17 5.92 5.85
 8 -2 -17 1.4 3.24
 8 -2 -17 0.63 2.9
 -8 2 -17 7.85 15.24
 -8 -2 17 -29.75 25.14
 -8 2 18 1.31 14.81
 -8 -2 -18 3.83 13.55
 8 -2 18 -4.12 15.53
 -8 -2 -18 -2.79 6.37
 8 2 18 5.2 6.39
 -8 -2 18 -4.01 16.11
 8 -2 -18 -0.05 5.11
 8 -2 -18 -0.43 2.48
 -8 2 -18 7.2 14.94
 -8 -2 -19 -12.09 15.12
 8 -2 19 13.62 16.56
 -8 2 19 -9.48 15.55
 8 -2 -19 -0.63 3.31
 -8 2 -19 -3.26 16.5
 -8 -2 19 7.04 17.78
 -8 2 20 13.12 16.83
 8 -2 20 21.02 19.4
 8 2 -20 1.15 13.73
 -8 -2 -20 -4.91 17.06
 8 -2 -20 2.45 6.71
 -8 -2 20 26.65 20.57
 8 2 20 4.93 6.86
 -8 2 -20 9.52 19.99
 -8 -2 -21 26.83 18.59
 8 -2 21 19.56 21.47
 8 2 -21 4.88 15.96
 -8 2 21 8.39 19.45
 8 2 21 9.18 11.77
 -8 -2 21 -2.12 23.54
 -8 2 -21 15.28 22.46
 8 -2 22 18.86 22.71
 -8 -2 -22 7.65 19.87
 -8 2 22 38.44 21.02
 8 2 -22 8.19 17.76
 -8 2 -22 15.84 23.86
 -8 -2 22 -19.04 39.66
 -8 -2 -23 22.08 32.7
 8 -2 23 16.99 36.6
 -8 2 23 8.08 21
 8 2 -23 8.26 28.72
 -8 -2 23 16.16 26.42
 -8 2 -23 1.62 24.69
 -8 -2 -24 -3.44 21.92
 8 -2 24 34.55 36.33
 8 2 -24 -5.92 19.09
 -8 2 24 10.04 21.49
 -8 -2 24 11.77 26.92
 -8 2 -24 17.29 23.41
 8 2 -25 9.25 20.08
 -8 -2 -25 -11.5 21.49
 -8 2 25 34.28 33.71
 8 -2 25 42.09 38.6
 -8 -2 25 -3.35 27.68
 -8 2 -25 -4.73 24.51
 -8 2 26 9.07 24.49
 -8 -2 -26 12.67 25.86
 8 -2 26 33.89 30.36
 -8 -2 26 1.53 32.43
 -8 2 -26 31.28 28.76
 -8 2 27 0.27 22.98
 -8 -2 -27 24.58 36.44
 8 -2 27 -0.43 28.76
 -8 -2 27 5.81 30.5
 -8 2 -27 11.28 27.62
 -8 -2 -28 8.57 26.29
 8 -2 28 -3.49 32.79
 -8 2 28 10.2 39.86
 -8 -2 28 52.96 72.49
 -8 2 -28 32.97 53.39
 -8 2 -28 22.66 48.05
 -8 -2 -29 8.26 25.36
 8 -2 29 3.92 32.39
 -8 2 29 12.2 25.09
 -8 2 -29 8.37 33.96
 -8 -2 29 -13.37 45.8
 -8 2 30 -26.69 26.74
 -8 -2 -30 -5.65 27.08
 8 -2 30 -2.18 34.55
 -8 2 -30 24.58 35.52
 -8 -2 30 -28.43 49.2
 -8 -2 -31 -25.34 40.76
 8 -2 31 -3.51 33.83
 -8 2 31 30.18 41.7
 -8 -2 31 37.23 47.11
 -8 2 -31 -4.57 34.53
 -8 -2 -32 -12.74 27.44
 -8 2 32 -0.54 28.25
 8 -2 32 -9.95 34.68
 -8 2 -32 6.05 35.74
 -8 -2 32 12.99 48.93
 -8 -2 -33 -13.91 26.36
 8 -2 33 -3.8 33.26
 -8 2 33 15.82 27.57
 -8 -2 33 24.13 53.41
 -8 2 -33 -1.62 34.14
 -8 -2 -34 14.45 30.38
 8 -2 34 29.91 38.85
 -8 2 34 -2.48 48.57
 -8 -2 34 -2.68 39.03
 -8 2 -34 -7.31 39.5
 9 -2 0 0.25 5.6
 -9 -2 0 6.55 9.54
 -9 2 0 -7.76 7.2
 -9 -2 0 -2.81 5.99
 -9 -2 0 -2.05 7.18
 9 -2 0 9.32 15.82
 9 -2 1 5.87 6.71
 -9 2 1 1.19 11.59
 -9 -2 -1 4.95 6.39
 -9 -2 -1 5.47 5.81
 -9 -2 -1 6.73 8.51
 9 -2 1 -4.19 10.76
 9 -2 -1 2.59 5.76
 9 -2 -1 5.74 11.23
 -9 2 -1 15.21 8.06
 -9 -2 1 3.26 12.78
 -9 -2 1 7.36 10.65
 -9 -2 1 12.24 7.36
 9 -2 2 22.55 16.38
 -9 2 2 6.12 9.63
 -9 -2 -2 -3.76 8.06
 -9 -2 -2 0.59 5.54
 -9 -2 -2 1.4 5.33
 9 -2 -2 2.14 4.84
 -9 2 -2 0.47 8.01
 -9 -2 2 -3.47 7.4
 -9 -2 2 8.35 7.58
 9 -2 -2 6.71 10.08
 9 -2 3 -7.7 10.24
 9 2 -3 0.81 1.35
 -9 -2 -3 -1.69 7.74
 -9 2 3 4.16 9.84
 -9 -2 -3 -2.54 8.15
 -9 -2 -3 3.47 8.06
 -9 -2 3 3.24 7.52
 9 -2 -3 3.2 4.3
 9 -2 -3 -14.74 9.63
 -9 2 -3 5.63 7.83
 -9 -2 -4 15.8 9.21
 9 -2 4 19.33 12.99
 -9 2 4 14.79 7.07
 -9 -2 -4 10.56 10.44
 -9 -2 -4 14 5.96
 9 -2 -4 15.46 5.13
 -9 -2 4 30.77 15.55
 -9 2 -4 6.93 10.58
 9 -2 -4 21.45 11.88
 9 -2 5 16.95 11.88
 -9 -2 -5 8.64 5.13
 -9 -2 -5 9.99 9.84
 -9 -2 -5 6.12 7.36
 -9 2 5 6.53 5.87
 9 -2 -5 2.77 3.92
 -9 -2 5 8.98 9.41
 9 -2 -5 7.29 10.94
 -9 2 -5 21.31 10.15
 9 -2 6 5.94 12.9
 -9 2 6 4.39 4.93
 -9 -2 -6 2.07 16.41
 -9 -2 -6 9.57 4.77
 -9 -2 -6 8.91 4.34
 9 -2 -6 5.85 5.31
 -9 -2 6 14.49 9.72
 9 -2 -6 14.38 11.1
 -9 2 -6 -0.38 14.97
 9 -2 7 11.03 13.84
 -9 -2 -7 9.21 4.84
 -9 -2 -7 18.1 11.23
 -9 -2 -7 14.65 4.41
 -9 -2 7 4.52 11.46
 9 -2 -7 10.24 4.75
 -9 -2 7 21.16 16.54
 9 -2 -7 20.08 12.58
 -9 2 -7 29.42 10.98
 9 -2 8 20.68 22.51
 -9 -2 -8 12.36 4.64
 -9 -2 -8 0.7 11.61
 9 -2 -8 14.16 3.47
 -9 -2 8 21.72 12.15
 -9 -2 8 16.59 16.68
 9 -2 -8 12.85 13.14
 -9 2 -8 8.42 11.86
 -9 -2 -9 13.35 6.66
 9 -2 9 18.23 15.17
 -9 -2 -9 22.35 18.75
 -9 -2 9 12.56 19.92
 9 -2 -9 19.56 13.86
 -9 2 -9 10.92 12.76
 -9 -2 9 21.18 16.81
 9 -2 10 6.57 14.25
 -9 -2 -10 11.16 11.82
 -9 -2 -10 8.28 5.6
 -9 -2 10 9.66 8.94
 -9 -2 10 5.56 12.78
 -9 2 -10 4.97 12.47
 9 -2 11 5.54 14.9
 -9 -2 -11 1.58 3.02
 -9 -2 -11 7.16 11.68
 -9 -2 11 12.94 14.72
 -9 -2 11 9.59 12.09
 -9 2 -11 -2.21 11.95
 9 -2 12 16.18 15.82
 -9 -2 -12 2.95 2.93
 -9 -2 12 8.39 12.78
 9 2 12 1.31 2.5
 -9 2 -12 11.07 12.65
 -9 -2 12 -5.74 8.53
 9 -2 13 -1.73 23.54
 -9 -2 -13 6.82 12.81
 -9 -2 -13 0.18 4.3
 -9 -2 13 2.81 7.88
 -9 -2 13 4.93 12.65
 9 2 13 -0.45 3.6
 -9 2 -13 -0.52 12.65
 9 -2 14 13.37 14.99
 -9 -2 -14 -12.27 14.45
 -9 -2 -14 5.36 2.9
 -9 -2 14 20.41 22.98
 -9 -2 14 3.06 7.72
 -9 2 -14 0.02 13.59
 9 2 14 -4.43 4.01
 9 -2 15 14.16 15.42
 -9 -2 -15 -4.64 15.1
 -9 -2 -15 1.98 4.86
 -9 -2 15 -10.74 16.16
 -9 2 -15 15.69 14.76
 9 2 15 1.6 2.97
 -9 2 16 2.48 15.78
 9 -2 16 11.86 16.61
 -9 -2 -16 4.07 5.24
 -9 -2 -16 9.59 15.17
 -9 -2 16 4.68 16.95
 -9 2 -16 20.26 16.11
 9 2 16 1.46 3.69
 -9 2 17 1.85 15.69
 9 -2 17 -0.05 25.52
 -9 -2 -17 0.25 4.12
 -9 -2 -17 13.41 15.57
 -9 -2 17 22.82 17.24
 -9 2 -17 7.83 16.38
 9 2 17 3.22 3.71
 -9 2 18 -3.94 16.99
 -9 -2 -18 12.72 16.14
 9 -2 18 -5.13 17.13
 9 2 18 2.99 4.37
 -9 -2 18 11.19 18.46
 -9 2 -18 -10.56 16.9
 9 -2 19 1.19 17.06
 -9 -2 -19 -3.08 24.1
 -9 2 19 -0.23 17.8
 9 2 19 1.76 4.61
 -9 2 -19 -7.4 17.31
 -9 -2 19 11.57 29.84
 -9 -2 -20 -7.72 18.68
 -9 2 20 26.69 32.16
 9 -2 20 6.8 19.87
 -9 -2 20 8.42 22.71
 -9 2 -20 19.33 20.84
 -9 2 21 12.76 20.19
 9 -2 21 0.32 20.35
 -9 -2 -21 4.37 19.09
 -9 2 -21 8.96 22.33
 -9 -2 21 17.96 23.95
 -9 2 22 -0.41 19.38
 9 -2 22 -0.68 30.09
 -9 -2 -22 -10.92 18.68
 -9 2 -22 2.9 21.58
 -9 -2 22 -1.28 23.59
 -9 2 23 21.31 33.94
 -9 -2 -23 -1.58 22.84
 9 -2 23 19.54 36.69
 -9 -2 23 12.06 26.6
 -9 2 -23 8.33 24.24
 -9 -2 -24 5.87 25.88
 9 -2 24 27.66 27.59
 -9 2 24 26.11 25.7
 -9 2 -24 21.18 29.17
 -9 -2 -25 -19.85 23.25
 9 -2 25 1.31 24.28
 -9 2 25 25.05 22.73
 -9 -2 25 5.51 28.83
 -9 2 -25 7.25 24.64
 -9 2 26 19 22.08
 -9 -2 -26 -18.95 22.84
 9 -2 26 10.26 25.12
 -9 -2 26 -14.56 28.67
 -9 2 -26 11.66 26.27
 -9 -2 -27 -23.32 23.92
 -9 2 27 30.95 23.18
 9 -2 27 -11.37 26.78
 -9 -2 27 14.09 30.27
 -9 2 -27 2.75 27.01
 -9 -2 -28 22.57 27.21
 9 -2 28 0.86 32.39
 -9 2 28 15.91 27.1
 -9 -2 28 6.75 35
 -9 2 -28 9.16 31.4
 -9 2 29 23.38 28.63
 -9 -2 -29 7.2 28.58
 9 -2 29 -6.71 34.37
 -9 -2 29 5.04 56.74
 -9 2 -29 42.49 57.57
 -9 -2 -30 8.48 28.04
 9 -2 30 30.43 33.85
 -9 2 30 7.97 27.98
 -9 2 -30 -20.23 37.41
 -9 -2 30 12.92 51.38
 9 -2 31 18.16 40.15
 -9 -2 -31 48.79 50.39
 -9 2 31 8.44 32.95
 -9 -2 31 23.47 59.48
 -9 2 -31 26.33 43.26
 -9 2 32 21.4 41.41
 -9 -2 -32 -28.11 25.7
 9 -2 32 -11.86 30.86
 -9 2 -32 3.26 33.44
 -9 -2 32 83.03 46.18
 -9 2 33 4.16 30.07
 -9 -2 -33 14.18 28.58
 9 -2 33 3.13 35.85
 -9 2 -33 -16.02 38.17
 -9 -2 33 13.19 53.54
 10 -2 0 2.5 7.18
 -10 2 0 10.38 13.48
 -10 -2 0 7.74 7.74
 10 -2 0 18.46 12.4
 -10 -2 0 2.7 8.44
 -10 -2 -1 20.84 8.12
 -10 2 1 12.51 8.91
 -10 -2 -1 25.27 9.99
 -10 -2 -1 13.23 8.15
 10 -2 1 14.58 21.07
 10 -2 -1 15.39 7.43
 -10 2 -1 15.42 9.75
 -10 -2 1 8.6 9.03
 10 -2 -1 11.75 20.1
 -10 -2 1 19.09 9.75
 -10 -2 -2 28.74 13.55
 -10 2 2 21.54 9.66
 -10 -2 -2 26.65 17.83
 -10 -2 -2 29.96 9.54
 10 -2 2 41.28 14.81
 -10 -2 2 32.77 16.79
 -10 -2 2 32.99 11.1
 -10 2 -2 29.17 17.94
 10 -2 -2 52.49 14.49
 -10 -2 2 28.18 16.79
 10 -2 -2 32.18 11.88
 -10 2 3 1.22 7.65
 -10 -2 -3 -4.16 9.77
 -10 -2 -3 4.66 6.66
 -10 -2 -3 7.31 6.66
 10 -2 3 21.25 18.1
 -10 -2 3 12.67 12.65
 10 -2 -3 9.95 8.01
 -10 2 -3 9.39 9.48
 10 -2 -3 21.72 17.04
 -10 -2 3 0.29 9.52
 -10 2 4 7.76 5.76
 10 -2 4 -8.39 12.49
 -10 -2 -4 -2.18 6.03
 -10 -2 -4 -4.86 9.75
 -10 -2 -4 6.48 5.92
 -10 2 -4 7.31 9.79
 10 -2 -4 13.8 11.28
 -10 -2 4 3.89 9.54
 -10 -2 4 3.78 7.76
 10 -2 -4 2.86 4.28
 10 -2 5 -0.95 12.33
 -10 -2 -5 3.58 9.52
 -10 -2 -5 4.43 9.75
 -10 2 5 5.54 9.39
 -10 -2 -5 9.14 8.17
 -10 -2 5 10.2 10.24
 10 -2 -5 1.71 3.74
 10 -2 -5 -0.18 11.7
 -10 2 -5 10.51 16.09
 -10 -2 -6 10.35 6.64
 10 -2 6 18.41 14.99
 -10 -2 -6 31.01 11.97
 -10 2 6 10.58 9.12
 -10 -2 -6 18.46 5.92
 -10 -2 6 24.51 19.13
 10 -2 -6 9.43 5.96
 10 -2 -6 30.63 13.59
 -10 2 -6 21 11.75
 10 -2 7 17.33 13.75
 -10 -2 -7 9.9 8.6
 -10 -2 -7 14.04 10.96
 10 -2 -7 4.48 4.05
 -10 -2 7 8.1 11.46
 10 -2 -7 13.68 12.65
 -10 2 -7 9.5 11.19
 10 -2 8 9.14 12.65
 10 2 -8 0.36 1.22
 -10 -2 -8 -4.19 6.86
 -10 -2 -8 8.62 10.17
 10 -2 -8 1.37 1.4
 -10 -2 8 7.22 9.7
 -10 -2 8 3.02 10.49
 10 -2 -8 -10.6 12.04
 -10 2 -8 13.89 10.26
 10 -2 9 10.67 13.8
 -10 -2 -9 -2.63 11.16
 -10 -2 -9 -4.37 7.2
 10 -2 -9 26.78 14.38
 -10 -2 9 -4.84 10.26
 -10 2 -9 0.38 11.77
 -10 -2 9 13.57 11.84
 -10 -2 -10 33.6 13.89
 -10 -2 -10 14.88 5.27
 10 -2 10 23.95 25.63
 -10 -2 10 5.47 14.83
 -10 2 -10 14.74 14.47
 -10 -2 10 5.47 11.64
 10 -2 11 -0.63 14.04
 -10 -2 -11 -1.31 3.96
 10 2 -11 0.92 1.71
 -10 -2 11 5 12.42
 -10 -2 11 4.14 12.58
 -10 2 -11 -4.01 12.13
 10 -2 12 -1.33 13.64
 -10 -2 -12 -3.47 12.96
 10 2 -12 -0.05 1.08
 -10 -2 -12 2.16 3.53
 -10 -2 12 2.54 9
 -10 -2 12 3.89 12.78
 -10 2 -12 7.49 19.27
 -10 -2 -13 17.01 13.71
 -10 -2 -13 -0.47 5.45
 10 -2 13 -12.2 25.88
 -10 -2 13 5.27 13.53
 -10 -2 13 8.51 12.4
 10 2 13 -1.22 3.08
 -10 2 -13 25.41 20.12
 10 -2 14 9.05 19.13
 -10 -2 -14 7.29 15.91
 -10 -2 -14 0.83 8.39
 10 2 14 5.42 5.31
 -10 -2 14 -2.77 16.45
 -10 -2 14 12.09 13.53
 -10 2 -14 10.89 24.33
 10 -2 15 3.24 19.99
 -10 -2 -15 -0.88 16.07
 -10 -2 15 21.65 13.14
 -10 -2 15 35.63 27.3
 10 2 15 3.8 5.58
 -10 2 -15 12.2 26.56
 -10 -2 -16 1.06 16.32
 10 -2 16 17.33 20.84
 -10 2 16 25.23 17.92
 -10 2 -16 49.67 28.63
 -10 -2 16 5.31 19.63
 10 2 16 5.33 5.81
 10 -2 17 27.14 18.61
 -10 -2 -17 -5.78 17.26
 -10 2 17 9.9 17.53
 -10 -2 17 27.77 19.42
 -10 2 -17 16.36 28.43
 10 2 17 -0.99 6.3
 10 -2 18 -5.51 18.41
 -10 -2 -18 34.55 26.45
 -10 2 18 -3.04 27.77
 -10 -2 18 -1.26 20.37
 -10 2 -18 3.15 28.72
 10 -2 19 1.46 19.51
 -10 -2 -19 3.2 18.52
 -10 2 19 3.08 19.63
 -10 -2 19 8.87 21.63
 -10 2 -19 7.72 20.01
 -10 2 20 28.52 24.26
 10 -2 20 10.62 23.34
 -10 -2 -20 17.38 21.72
 -10 -2 20 14.45 39.61
 -10 2 -20 12.38 23.74
 -10 2 21 27.05 24.73
 10 -2 21 29.06 36.33
 -10 -2 -21 18.28 22.96
 -10 2 -21 17.31 26.29
 -10 -2 21 9.72 28.54
 -10 -2 -22 13.12 33.69
 10 -2 22 12.09 35.97
 -10 2 22 28.22 24.01
 -10 -2 22 -1.69 27.93
 -10 2 -22 -1.33 24.51
 -10 2 23 -4.23 23.29
 10 -2 23 1.98 22.03
 -10 -2 -23 3.35 23.38
 -10 -2 23 30.41 26.58
 -10 2 -23 3.15 24.85
 -10 -2 -24 21 24.17
 -10 2 24 -23.29 24.33
 10 -2 24 -1.08 23.32
 -10 2 -24 11.1 26.24
 -10 -2 24 24.64 27.95
 -10 -2 -25 -7.74 23.23
 10 -2 25 5.74 23.23
 -10 2 25 4.28 24.06
 -10 -2 25 22.98 42.72
 -10 2 -25 -0.95 25.95
 -10 -2 -26 7.38 44.68
 -10 2 26 51.67 44.72
 10 -2 26 5.11 28.85
 -10 -2 26 12.6 35.45
 -10 2 -26 21.65 31.8
 10 -2 27 15.39 24.1
 -10 -2 -27 -19.29 23.36
 -10 2 27 7.45 23.29
 -10 -2 27 2.66 29.24
 -10 2 -27 -3.94 27.08
 -10 2 28 19.11 30.72
 -10 -2 -28 10.31 30.81
 10 -2 28 6.62 32.95
 -10 -2 28 10.15 39.59
 -10 2 -28 45.33 34.55
 10 -2 29 26.33 33.08
 -10 -2 -29 27.64 30.2
 -10 2 29 12.11 30.43
 -10 -2 29 -4.21 38.44
 -10 2 -29 -10.85 34.55
 -10 2 30 39.88 32.97
 -10 -2 -30 5.96 50.64
 10 -2 30 12.51 35.76
 -10 -2 30 -6.37 42.11
 -10 2 -30 6.5 65.49
 -10 2 -30 26.78 58.29
 -10 -2 -31 -6.68 28.13
 10 -2 31 4.37 31.8
 -10 2 31 19.13 28.2
 -10 -2 31 12.99 79.97
 -10 2 -31 -13.37 36.82
 -10 -2 -32 33.38 31.28
 10 -2 32 18.1 36.33
 -10 2 32 -11.82 32.54
 -10 -2 32 -2.77 57.35
 -10 2 -32 -1.26 41.46
 -11 -2 0 -4.25 7.81
 -11 2 0 -5.54 7.88
 -11 -2 0 6.1 12.96
 11 -2 0 15.64 17.71
 -11 -2 -1 6.26 13.12
 -11 2 1 2.21 8.8
 -11 -2 -1 9.63 9.48
 11 -2 1 15.21 13.23
 11 -2 -1 -2.66 10.85
 11 -2 -1 10.24 13.23
 -11 2 -1 11.5 9.36
 -11 -2 1 10.24 8.91
 -11 -2 1 1.85 9.12
 -11 2 2 19.72 8.87
 -11 -2 -2 7.94 10.85
 -11 -2 -2 13.21 8.98
 11 -2 2 27.39 14.72
 11 -2 -2 7.61 6.95
 -11 -2 2 14.79 9.41
 -11 -2 2 21.18 10.51
 -11 2 -2 15.62 16.52
 11 -2 -2 18.12 21.79
 -11 2 3 4.52 12.22
 -11 -2 -3 15.24 14.16
 11 -2 3 -0.61 12.4
 -11 -2 -3 9.97 7.16
 -11 -2 -3 9.54 10.74
 11 -2 -3 -1.67 5.4
 -11 2 -3 3.62 9.88
 -11 -2 3 1.58 8.26
 -11 -2 3 8.19 14.79
 11 -2 -3 -9.61 11.82
 -11 -2 -4 3.08 10.83
 -11 2 4 7.65 9.54
 -11 -2 -4 6.73 9.39
 -11 -2 -4 6.44 10.02
 11 -2 4 -2.66 12.24
 11 -2 -4 2.41 7.36
 -11 -2 4 8.62 10.13
 -11 2 -4 0.27 10.35
 11 -2 -4 -3.6 18.07
 -11 -2 4 -6.21 7.94
 11 -2 5 6.14 13.05
 -11 -2 -5 -9.09 6.48
 -11 -2 -5 7.07 9.9
 -11 -2 -5 0.5 5.9
 -11 2 5 1.73 6.14
 11 -2 -5 1.53 11.68
 11 -2 -5 5.13 4.19
 -11 -2 5 -3.89 10.38
 -11 2 -5 2.84 15.24
 -11 -2 5 3.02 11.68
 11 -2 6 7.38 15.64
 -11 -2 -6 12.11 7.67
 -11 2 6 5.06 9.23
 -11 -2 -6 18.77 18.48
 -11 -2 -6 14.38 6.82
 -11 -2 6 19.92 9.21
 11 -2 -6 13.32 5.85
 -11 2 -6 11.59 12.2
 11 -2 -6 15.44 13.84
 -11 -2 6 7.16 13.26
 11 -2 7 -0.25 21.9
 -11 -2 -7 5.47 10.78
 -11 -2 -7 2.54 10.94
 11 -2 -7 2.21 3.83
 -11 -2 7 13.55 19.04
 11 -2 -7 17.33 13.35
 -11 2 -7 -1.42 11.39
 -11 -2 7 5.81 7.85
 11 -2 8 19.11 16.43
 -11 -2 -8 14.58 6.75
 -11 -2 -8 18.01 13.1
 -11 -2 8 0.47 13.98
 11 -2 -8 9.45 15.62
 -11 2 -8 16.18 13.62
 11 -2 9 12.76 14.04
 11 2 -9 0.97 1.22
 -11 -2 -9 0.36 8.71
 -11 -2 -9 -0.14 11.52
 -11 -2 9 1.37 12.06
 -11 2 -9 9.21 12
 11 -2 10 54.31 22.44
 -11 -2 -10 47.89 8.15
 -11 -2 -10 65.76 29.91
 -11 2 -10 61.47 19.65
 -11 -2 10 45.06 19.65
 -11 -2 10 50.23 15.06
 11 -2 11 58.29 23.5
 -11 -2 -11 58.88 7.74
 -11 -2 -11 57.23 21.65
 -11 -2 11 56.33 13.3
 -11 -2 11 41.66 21.7
 -11 2 -11 58.72 20.57
 11 -2 12 15.1 27.41
 -11 -2 -12 1.58 8.51
 -11 -2 -12 12.69 16.18
 -11 -2 12 12.04 10.94
 -11 -2 12 32.86 26.11
 -11 2 -12 25.05 24.76
 11 -2 13 1.85 19.02
 -11 -2 -13 -0.27 16.86
 -11 -2 -13 11.39 5.51
 -11 -2 13 8.19 17.24
 -11 2 -13 12.63 26.27
 -11 -2 13 5.02 9.52
 11 -2 14 -0.41 16.54
 -11 -2 -14 21.16 14.09
 11 2 -14 -0.27 1.62
 -11 -2 14 -7.02 15.78
 -11 -2 14 2.03 8.44
 11 2 14 4.07 3.78
 -11 2 -14 8.17 23.59
 11 -2 15 38.31 22.37
 -11 -2 -15 22.48 20.3
 -11 -2 15 45.71 21.65
 11 2 15 11.19 7.9
 -11 2 -15 44.47 31.35
 -11 2 16 21.61 18.57
 11 -2 16 33.13 34.82
 -11 -2 -16 -19.83 17.71
 -11 -2 16 2.41 19.74
 -11 2 -16 28.99 28.61
 -11 2 17 10.06 20.28
 -11 -2 -17 -1.55 30.29
 11 -2 17 10.02 23.77
 -11 -2 17 5.27 34.03
 -11 2 -17 28.7 32.39
 -11 2 18 56.63 39
 11 -2 18 34.57 30.07
 -11 -2 -18 23.88 23.97
 -11 -2 18 52.22 28.92
 -11 2 -18 25.32 41.07
 -11 -2 -19 22.48 22.64
 11 -2 19 26.45 27.75
 -11 2 19 18.88 25.52
 -11 2 -19 23.05 39.48
 -11 -2 19 22.06 26.87
 11 -2 20 34.32 44.99
 -11 -2 -20 29.78 23.7
 -11 2 20 23.41 26.96
 -11 -2 20 0.38 28.65
 -11 2 -20 43.89 27.41
 -11 2 21 15.75 36.17
 11 -2 21 -1.37 37
 -11 -2 -21 10.74 22.24
 -11 -2 21 15.82 26.47
 -11 2 -21 2.81 24.55
 -11 2 22 -12.15 23.65
 11 -2 22 12.9 22.57
 -11 -2 -22 4.16 23.5
 -11 2 -22 12.24 24.69
 -11 -2 22 11.01 41.88
 11 -2 23 20.68 22.98
 -11 -2 -23 -19.18 24.44
 -11 2 23 -0.83 24.26
 -11 -2 23 -3.56 27.77
 -11 2 -23 -18.5 25.25
 -11 -2 -24 -4.77 26.11
 11 -2 24 8.53 24.73
 -11 2 24 33.78 42.38
 -11 -2 24 32.14 30.38
 -11 2 -24 -11.32 28.54
 11 -2 25 19.65 22.71
 -11 -2 -25 -22.55 24.13
 -11 2 25 -12.67 25.97
 -11 -2 25 0.23 28.47
 -11 2 -25 19.4 26.38
 -11 -2 -26 27.57 43.19
 11 -2 26 5.94 26.51
 -11 2 26 1.96 29.24
 -11 -2 26 -45.1 33.71
 -11 2 -26 48.39 30.36
 -11 -2 -27 14.36 26.81
 11 -2 27 -4.39 26.78
 -11 2 27 14.54 43.21
 -11 -2 27 24.85 53.61
 -11 2 -27 -9.21 31.22
 -11 -2 -28 27.32 31.87
 11 -2 28 -1.94 32.25
 -11 2 28 17.74 32.23
 -11 -2 28 37.77 41.66
 -11 2 -28 7.25 36.08
 11 -2 29 8.51 30.61
 -11 -2 -29 16.47 30.68
 -11 2 29 4.43 31.24
 -11 -2 29 3.24 38.76
 -11 2 -29 7.94 34.43
 11 -2 30 45.78 52.53
 -11 2 30 -7.11 52.85
 -11 -2 30 0.05 42.72
 -11 2 -30 5.29 65.45
 -11 2 -30 36.87 59.93
 -11 -2 -31 14.92 32.48
 11 -2 31 1.78 52.58
 -11 2 31 -10.35 33.08
 -11 -2 31 17.74 40.76
 -11 2 -31 25.95 41.1
 -12 -2 0 -0.92 9.03
 -12 2 0 2.79 8.64
 -12 -2 0 -2.93 14.49
 12 -2 0 6.5 12.29
 -12 -2 -1 14.29 13.55
 -12 2 1 -7.65 8.6
 -12 -2 -1 2.86 8.44
 12 -2 1 16.9 19.02
 12 -2 -1 -2.09 11.61
 -12 -2 1 1.51 8.64
 -12 2 -1 0.52 9.23
 -12 -2 1 1.49 9.12
 12 -2 -1 -8.26 19.11
 -12 -2 -2 -2.41 8.15
 -12 -2 -2 -0.05 9.23
 -12 2 2 6.73 12.13
 12 -2 2 2.59 13.12
 -12 -2 2 4.16 12.87
 12 -2 -2 2.21 6.71
 -12 -2 2 -3.87 9.68
 -12 2 -2 2.48 9.63
 12 -2 -2 0.59 11.77
 -12 -2 -3 12.4 11.41
 -12 -2 -3 12.45 14.04
 -12 2 3 13.26 8.35
 12 -2 3 11.41 15.73
 12 -2 -3 7.74 6.93
 -12 -2 3 6.86 9.3
 -12 -2 3 5.96 11.75
 -12 2 -3 10.29 11.79
 12 -2 -3 7.94 13.95
 -12 -2 -4 21.36 12.67
 -12 2 4 5.56 13.12
 -12 -2 -4 4.84 17.89
 12 -2 4 11.48 14.99
 -12 -2 4 18.73 18.84
 12 -2 -4 -9.52 14.52
 -12 -2 4 5.06 19.6
 -12 -2 4 17.15 9.05
 -12 2 -4 12.67 12.51
 12 -2 -4 4.34 8.8
 -12 -2 -5 13.82 8.76
 -12 -2 -5 6.03 12.06
 -12 -2 -5 12.4 8.17
 12 -2 5 23.38 15.78
 -12 2 5 6.75 12.24
 12 -2 -5 13.12 7.72
 -12 -2 5 6.53 14.11
 -12 -2 5 17.65 13.5
 12 -2 -5 22.48 15.12
 -12 2 -5 -0.18 19.4
 -12 -2 -6 -0.65 7.92
 -12 -2 -6 -1.98 11.46
 -12 -2 -6 7.61 6.95
 -12 2 6 3.71 5.9
 12 -2 6 7.56 21.67
 -12 -2 6 19.76 12.69
 -12 -2 6 0.54 8.03
 12 -2 -6 1.24 5.42
 12 -2 -6 8.62 14.2
 -12 2 -6 7.2 11.75
 -12 -2 -7 4.16 12.92
 -12 2 7 7.63 6.8
 -12 -2 -7 13.14 12.06
 12 -2 7 4.7 15.89
 -12 -2 7 11.16 13.66
 12 -2 -7 3.51 3.94
 -12 -2 7 4.34 8.37
 12 -2 -7 -20.19 14.4
 -12 2 -7 8.21 12.85
 12 -2 8 6.14 14.99
 -12 -2 -8 -4.73 10.67
 -12 -2 8 -1.98 20.71
 12 -2 -8 3.11 14.45
 -12 2 -8 9.12 12.63
 -12 -2 8 -1.01 12.13
 -12 -2 -9 34.19 9.81
 -12 -2 -9 46.52 19.31
 12 -2 9 49.49 21.79
 -12 -2 9 24.89 19.4
 -12 -2 9 47.26 10.94
 -12 2 -9 46.86 18.64
 12 -2 10 8.71 17.8
 -12 -2 -10 -4.75 15.6
 -12 -2 10 7.38 8.53
 -12 -2 10 9.54 15.78
 -12 2 -10 22.1 15.28
 12 -2 11 4.84 17.67
 -12 -2 -11 14.63 16.14
 -12 2 -11 -0.92 15.96
 -12 -2 11 6.01 16.25
 12 -2 12 2.95 19.42
 -12 -2 -12 33.29 26.15
 -12 -2 12 13.08 17.17
 -12 2 -12 -18.55 26.45
 12 -2 13 118.2 32.09
 -12 -2 -13 98.11 27.86
 -12 -2 13 112.58 45.49
 -12 2 -13 118.99 44.72
 -12 -2 -14 0.7 19.99
 12 -2 14 23.83 22.96
 -12 -2 14 27.62 21.61
 -12 2 -14 42.22 32.25
 12 -2 15 -19.18 31.49
 -12 -2 -15 4.48 17.67
 -12 -2 15 6.64 19.63
 -12 2 -15 26.99 28.65
 12 -2 16 30.11 24.26
 -12 2 16 0.27 22.64
 -12 -2 -16 42.18 31.91
 -12 -2 16 -0.32 23.14
 -12 2 -16 42.87 34.16
 -12 -2 -17 11.14 19.4
 -12 2 17 9.36 20.64
 12 -2 17 -9.75 22.57
 -12 -2 17 20.55 21.4
 -12 2 -17 -4.14 33.15
 12 -2 18 8.98 23.68
 -12 2 18 2.86 21.49
 -12 -2 -18 20.8 20.5
 -12 -2 18 25.86 38.4
 -12 2 -18 -18.43 35.58
 12 -2 19 28 36.51
 -12 -2 -19 -7.2 21.76
 -12 2 19 6.39 24.22
 -12 -2 19 37.05 25.25
 -12 2 -19 -22.35 36.87
 -12 -2 -20 -4.75 24.15
 12 -2 20 27.55 45.22
 -12 2 20 21.27 26.22
 -12 -2 20 36.26 29.01
 -12 2 -20 17.71 26.96
 -12 2 21 16.59 46.97
 12 -2 21 31.67 32.39
 -12 -2 -21 25.86 45.78
 -12 -2 21 18.64 32.5
 -12 2 -21 33.58 29.39
 12 -2 22 23.9 29.19
 -12 -2 -22 3.24 26.65
 -12 2 22 9.93 26.22
 -12 2 -22 23.63 28.29
 -12 -2 22 -8.76 29.51
 -12 -2 -23 5.02 24.89
 -12 2 23 1.8 25.68
 12 -2 23 -1.98 27.26
 -12 2 -23 9.95 25.86
 -12 -2 23 -0.36 45.53
 -12 2 24 40.65 45.06
 12 -2 24 11.01 29.93
 -12 -2 -24 14.81 29.15
 -12 -2 24 10.47 33.76
 -12 2 -24 -4.93 30.74
 12 -2 25 26.85 28.27
 -12 -2 -25 -24.85 44.05
 -12 2 25 -14.74 28.94
 -12 -2 25 14.7 32.41
 -12 2 -25 7.07 29.42
 -12 -2 -26 -22.96 25.39
 12 -2 26 11.48 26.6
 -12 2 26 -15.75 28.04
 -12 2 -26 15.37 29.03
 -12 -2 26 12.65 31.69
 -12 -2 -27 -12.49 27.95
 12 -2 27 15.98 43.87
 -12 2 27 3.78 47.98
 -12 2 -27 21.29 30.81
 -12 -2 27 -3.83 33.85
 -12 2 28 3.85 32.54
 -12 -2 -28 27.23 30.29
 12 -2 28 9.75 43.42
 -12 -2 28 -8.57 59.98
 -12 2 -28 -14.74 34.53
 -12 -2 -29 -2.54 32.32
 12 -2 29 0.16 45.35
 -12 2 29 10.67 33.2
 -12 -2 29 30.81 40.65
 -12 2 -29 10.31 36.37
 12 -2 30 14.58 30.27
 -12 -2 -30 -5.33 49.85
 -12 2 30 9.41 33.26
 -12 -2 30 8.62 40.92
 -12 2 -30 0.2 62.93
 -12 2 -30 -7.47 58
 -13 -2 0 12.78 9.99
 13 -2 0 15.71 23.09
 -13 2 0 -3.71 10.29
 -13 -2 0 1.31 17.44
 -13 -2 -1 8.48 10.53
 -13 -2 -1 2.3 10.13
 -13 2 1 5.06 10.35
 13 -2 1 9.21 14.83
 -13 -2 1 2.34 10.78
 -13 -2 1 2.77 9.52
 -13 2 -1 -3.33 10.85
 13 -2 -1 11.1 13.77
 -13 2 2 13.39 17.53
 -13 -2 -2 34.05 20.01
 -13 -2 -2 21.88 12.38
 13 -2 2 26.24 18.03
 13 -2 -2 21.74 9
 -13 -2 2 17.01 18.55
 13 -2 -2 26.13 17.29
 -13 -2 2 21.9 14.11
 -13 2 -2 27.73 13.62
 -13 -2 -3 15.82 15.75
 -13 2 3 7.92 9.07
 -13 -2 -3 6.26 11.68
 13 -2 3 8.69 16.65
 13 -2 -3 13.1 10.4
 -13 -2 3 1.26 9.95
 13 -2 -3 10.98 15.08
 -13 -2 3 6.71 12.69
 -13 2 -3 4.93 12.63
 -13 -2 -4 28.22 9.99
 -13 -2 -4 8.64 13.1
 -13 2 4 16.68 9.95
 13 -2 4 14.94 17.24
 -13 -2 4 20.68 14.63
 13 -2 -4 4.19 6.53
 -13 -2 4 22.57 10.38
 -13 2 -4 24.53 14.29
 13 -2 -4 22.93 16.99
 -13 2 5 -0.07 9.68
 -13 -2 -5 8.1 11.16
 -13 -2 -5 3.04 7.99
 -13 -2 5 -0.7 19.96
 -13 -2 5 8.12 12.96
 13 -2 -5 -3.4 7.34
 13 -2 -5 6.46 22.3
 -13 2 -5 5.85 18.03
 -13 -2 -6 29.48 24.49
 -13 -2 -6 34.68 10.04
 -13 2 6 15.46 8.19
 13 -2 6 41.73 19.78
 13 -2 -6 24.46 19.92
 -13 -2 6 29.8 10.78
 -13 2 -6 41.68 16.36
 -13 -2 6 37.43 18.1
 -13 -2 -7 6.95 13.71
 -13 2 7 -0.5 4.48
 13 -2 7 0.74 15.62
 -13 -2 7 10.74 8.15
 -13 -2 7 18.64 14.56
 13 -2 -7 4.77 15.87
 -13 2 -7 5.2 13.23
 13 -2 8 14.07 24.53
 -13 -2 -8 -7.4 13.41
 -13 -2 8 -5.38 14.25
 -13 -2 8 3.85 7.18
 -13 2 -8 -9.48 12.96
 13 -2 9 26.74 20.59
 -13 -2 -9 6.68 17.85
 -13 -2 9 29.91 29.24
 -13 2 -9 25.09 17.35
 -13 -2 9 15.84 14.74
 13 -2 10 15.66 19.81
 -13 -2 -10 10.94 17.53
 -13 -2 10 8.96 8.64
 -13 2 -10 17.06 17.1
 -13 -2 10 16.02 17.98
 -13 -2 -11 11.97 29.55
 13 -2 11 12.96 35
 -13 -2 11 30.14 9.48
 -13 -2 11 15.75 20.93
 -13 2 -11 21.02 20.14
 13 -2 12 6.19 19.99
 -13 -2 -12 10.26 17.04
 -13 -2 12 10.13 12.45
 -13 2 -12 2.14 27.82
 -13 -2 12 -3.58 18.84
 13 -2 13 5.76 23.14
 -13 -2 -13 20.23 19.78
 -13 -2 13 30.25 21.61
 -13 -2 13 18.46 8.91
 -13 2 -13 15.6 32.41
 13 -2 14 38.49 38.15
 -13 -2 -14 2.52 20.86
 -13 -2 14 19.13 35.36
 -13 -2 14 21.72 8.91
 -13 2 -14 17.01 35.02
 13 -2 15 4.57 23.5
 -13 -2 -15 4.43 30.72
 -13 -2 15 11.21 22.06
 -13 2 -15 30.29 32.97
 13 -2 16 -1.51 24.42
 -13 -2 -16 15.21 20.5
 -13 2 16 21.7 22.87
 -13 -2 16 3.38 23.2
 -13 2 -16 34.73 35.36
 13 -2 17 -5.94 21.4
 -13 2 17 -4.82 20.39
 -13 -2 -17 -3.17 18.55
 -13 -2 17 10.8 20.62
 -13 2 -17 20.37 31.31
 13 -2 18 17.65 42.94
 -13 -2 -18 17.31 23.38
 -13 2 18 21.07 24.98
 -13 -2 18 1.42 26.06
 -13 2 -18 31.78 40.35
 13 -2 19 66.62 44.72
 -13 -2 -19 8.55 24.17
 -13 2 19 25.93 27.17
 -13 -2 19 -11.86 45.17
 -13 2 -19 8.35 27.19
 13 -2 20 19.45 28.9
 -13 -2 -20 27.46 39.66
 -13 2 20 9.99 26.83
 -13 -2 20 12.6 29.28
 -13 2 -20 -0.68 27.8
 13 -2 21 15.57 29.21
 -13 -2 -21 28.74 26.74
 -13 2 21 11.61 29.21
 -13 2 -21 23.27 28.92
 -13 -2 21 -17.22 31.19
 13 -2 22 -2.18 28.2
 -13 -2 -22 2.27 27.91
 -13 2 22 4.91 27.19
 -13 2 -22 15.33 28.36
 -13 -2 22 20.35 30.56
 13 -2 23 -7.02 24.6
 -13 -2 -23 -8.51 24.53
 -13 2 23 -14.63 24.31
 -13 -2 23 6.23 27.26
 -13 2 -23 24.33 25.21
 -13 2 24 8.39 26.2
 13 -2 24 20.12 39.61
 -13 -2 -24 -16.88 40.58
 -13 -2 24 -8.1 29.96
 -13 2 -24 -9.75 27.93
 -13 2 25 12.63 29.98
 -13 -2 -25 -12.2 27.73
 -13 -2 25 8.82 33.89
 -13 2 -25 10.76 30.99
 -13 -2 -26 -16.72 28.02
 13 -2 26 18.88 44.05
 -13 2 26 -2.43 30.25
 -13 -2 26 8.1 33.44
 -13 2 -26 18.1 30.36
 -13 -2 -27 25.34 28.25
 13 -2 27 11.03 27.77
 -13 2 27 -18.55 29.84
 -13 2 -27 -3.53 30.77
 -13 -2 27 -16.95 33.53
 -13 -2 -28 -6.08 30.45
 13 -2 28 18.95 28.76
 -13 2 28 2.12 31.51
 -13 -2 28 -4.95 36.37
 -13 2 -28 2.61 33.58
 13 -2 29 -14.85 28.18
 -13 2 29 8.85 32.34
 -13 -2 29 13.55 60.39
 -13 2 -29 -3.02 33.56
 -14 -2 0 1.69 11.73
 -14 2 0 12.81 12.02
 -14 -2 0 15.3 13.5
 14 -2 0 12.45 16.52
 -14 -2 -1 75.22 19.15
 -14 2 1 56.4 19.6
 -14 -2 -1 84.47 20.93
 14 -2 1 119.37 39.52
 -14 -2 1 89.04 31.17
 -14 -2 1 100.42 26.72
 -14 2 -1 74.11 20.39
 14 -2 -1 114.81 25.61
 -14 -2 -2 6.14 13.12
 -14 2 2 13.73 17.35
 -14 -2 -2 16.86 12.96
 14 -2 2 0.52 18.52
 -14 -2 2 6.21 11.25
 -14 -2 2 16.23 14.43
 -14 2 -2 20.39 14.02
 14 -2 -2 23.5 17.6
 -14 2 3 -0.68 9.03
 -14 -2 -3 -1.28 11.34
 -14 -2 -3 -6.26 16.43
 14 -2 3 16.86 15.84
 -14 -2 3 -3.85 9.32
 14 -2 -3 32.66 15.42
 -14 -2 3 2.75 12.76
 -14 2 -3 0.23 12.72
 14 -2 4 -8.6 23.02
 -14 2 4 -7.2 8.12
 -14 -2 -4 -10.87 13.37
 -14 -2 4 4.48 12
 14 -2 -4 8.48 13.59
 -14 -2 4 5.99 7.94
 -14 2 -4 2.07 12.31
 -14 -2 -5 15.51 9.23
 -14 2 5 -1.42 7.49
 -14 -2 -5 0 14.22
 14 -2 5 7.02 17.98
 -14 -2 5 7.13 14.94
 -14 -2 5 16.77 22.84
 -14 2 -5 19.49 23.74
 14 -2 -5 8.39 17.38
 -14 2 -5 5.74 21.04
 -14 -2 -6 -2.45 8.62
 -14 -2 -6 7.2 13.62
 -14 2 6 8.48 9.63
 14 -2 6 5.11 16.86
 -14 -2 6 -3.67 8.48
 14 -2 -6 15.62 16.07
 -14 2 -6 -3.98 13.28
 -14 -2 6 2.25 14.67
 -14 2 7 -2.63 7.18
 -14 -2 -7 4.59 13.98
 -14 -2 -7 -2.43 12.31
 14 -2 7 9.99 24.76
 14 -2 -7 -0.23 16.18
 -14 -2 7 11.84 14.99
 -14 -2 7 1.19 8.03
 -14 2 -7 1.51 13.64
 -14 -2 -8 1.58 16.81
 14 -2 8 11.43 18.91
 -14 -2 8 21.85 18.23
 -14 -2 8 8.69 9.14
 -14 2 -8 9.7 16.77
 -14 -2 -9 -6.62 25.66
 14 -2 9 20.01 18.23
 -14 -2 9 0.56 18.41
 -14 -2 9 13.12 12.58
 -14 2 -9 -9.59 16.97
 14 -2 10 -2.34 32.41
 -14 -2 -10 19.58 16.9
 -14 -2 10 11.97 29.15
 -14 -2 10 8.6 12.27
 -14 2 -10 -0.86 18.03
 -14 -2 -11 17.04 16.23
 14 -2 11 12.51 19.6
 -14 -2 11 1.49 7.16
 -14 -2 11 -12.04 18.19
 -14 2 -11 0.63 17.15
 14 -2 12 -5.18 21.11
 -14 -2 -12 3.29 18.23
 -14 -2 12 8.78 7.52
 -14 2 -12 9.54 18.84
 -14 -2 12 9.21 19.94
 14 -2 13 13.21 35.99
 -14 -2 -13 5.87 19.6
 -14 -2 13 19.45 21.97
 -14 2 -13 6.75 21.07
 14 -2 14 -9.61 21.16
 -14 -2 -14 19.76 27.5
 -14 -2 14 8.64 31.19
 -14 2 -14 1.28 19.85
 14 -2 15 2.03 24.49
 -14 -2 -15 10.62 19.9
 -14 -2 15 10.06 23.56
 -14 2 -15 10.71 22.44
 14 -2 16 21.52 25.14
 -14 2 16 -4.86 23.14
 -14 -2 -16 13.53 20.89
 -14 -2 16 16.47 23.65
 -14 2 -16 -7.99 23.63
 14 -2 17 20.35 43.26
 -14 -2 -17 10.53 22.75
 -14 2 17 9.57 24.62
 -14 -2 17 12.87 25.91
 -14 2 -17 11.88 25.57
 14 -2 18 -5.04 27.01
 -14 2 18 -0.16 23.9
 -14 -2 -18 -6.3 21.76
 -14 -2 18 21.13 24.8
 -14 2 -18 16.99 24.73
 -14 -2 -19 18.3 40.24
 14 -2 19 30.61 29.26
 -14 2 19 2.05 27.91
 -14 -2 19 16.56 41.91
 -14 2 -19 -5.24 27.8
 14 -2 20 5.65 27.91
 -14 -2 -20 -7.13 25.36
 -14 2 20 13.55 26.54
 -14 -2 20 24.58 28.04
 -14 2 -20 -10.17 27.12
 14 -2 21 -7.81 30.5
 -14 -2 -21 20.17 27.35
 -14 2 21 9.54 29.12
 -14 -2 21 3.13 31.08
 -14 2 -21 13.46 29.19
 14 -2 22 23.16 36.06
 -14 2 22 24.37 33.58
 -14 -2 -22 17.53 32.66
 -14 -2 22 33.85 37.29
 -14 2 -22 37.86 35.38
 14 -2 23 49.18 44.25
 -14 -2 -23 -42.51 40.69
 -14 2 23 -12.54 26.24
 -14 -2 23 17.08 29.06
 -14 2 -23 -4.3 27.5
 -14 2 24 10.31 31.08
 14 -2 24 -11.73 49.45
 -14 -2 -24 13.44 29.57
 -14 -2 24 10.06 52.71
 -14 2 -24 4.39 31.51
 14 -2 25 3.06 30.34
 -14 -2 -25 -14.88 29.51
 -14 2 25 13.01 31.46
 -14 -2 25 -21.99 34.71
 -14 2 -25 -5.65 32.39
 14 -2 26 12.83 32.68
 -14 -2 -26 14.25 34.32
 -14 2 26 17.01 36.71
 -14 2 -26 8.89 36.84
 -14 -2 26 18.93 40.85
 14 -2 27 18.93 31.44
 -14 -2 -27 -11.84 35.81
 -14 2 27 15.66 37.7
 -14 -2 27 47.67 41.55
 -14 2 -27 9.52 38.71
 -14 2 28 26.29 53.18
 -14 -2 -28 1.13 52.15
 -14 -2 28 1.87 39
 -14 2 -28 6.19 36.64
 -15 -2 0 6.62 12.2
 -15 2 0 6.75 12.72
 -15 -2 0 7.36 22.42
 15 -2 0 10.85 16.92
 -15 -2 -1 20.01 15.03
 -15 2 1 8.37 14.25
 -15 -2 -1 17.49 21.67
 15 -2 1 15.35 19.2
 15 -2 -1 17.15 20.03
 -15 -2 1 23.45 12.65
 -15 2 -1 15.87 15.37
 -15 -2 1 8.87 24.42
 -15 2 2 19.87 19.72
 -15 -2 -2 38.04 23.68
 -15 -2 -2 8.37 14.92
 15 -2 2 44.41 30.2
 -15 -2 2 17.78 12.54
 -15 -2 2 13.21 16.86
 -15 2 -2 19.74 25.07
 15 -2 -2 19.96 20.84
 15 -2 3 25.88 19.99
 -15 -2 -3 9.48 13.89
 -15 -2 -3 13.32 15.75
 -15 2 3 11.75 11.61
 15 -2 -3 -1.35 20.46
 -15 -2 3 31.46 17.13
 -15 -2 3 18.86 11.77
 -15 2 -3 13.37 16.9
 -15 2 4 2.12 10.15
 -15 -2 -4 9.5 14.47
 -15 -2 -4 3.76 16.88
 15 -2 4 6.08 18.03
 -15 -2 4 1.26 15.71
 -15 -2 4 12.76 15.35
 -15 2 -4 0.09 15.75
 15 -2 -4 4.68 17.98
 -15 2 5 1.6 8.19
 -15 -2 -5 -3.89 15.26
 -15 -2 -5 15.62 10.26
 15 -2 5 25.93 28.49
 -15 -2 5 5.2 25.21
 -15 -2 5 18.28 14.67
 -15 2 -5 1.22 16.79
 15 -2 -5 -17.69 18.55
 -15 -2 -6 10.26 11.16
 -15 -2 -6 5.6 17.17
 15 -2 6 32.84 21
 -15 2 -6 16.2 26.65
 -15 -2 6 13.48 9.9
 15 -2 -6 15.82 20.26
 -15 -2 6 7.58 18.86
 -15 -2 -7 7.74 10.13
 -15 -2 -7 28.38 24.06
 15 -2 7 2.3 19.69
 -15 -2 7 3.67 8.71
 -15 2 -7 -9.48 16.77
 -15 -2 7 21.83 18.12
 -15 -2 -8 0.2 17.38
 -15 -2 -8 21.58 15.66
 15 -2 8 4.97 21.83
 -15 2 -8 20.59 18.12
 -15 -2 8 9.32 9.07
 -15 -2 8 15.89 20.17
 -15 -2 -9 18.21 17.83
 15 -2 9 -10.22 21.58
 -15 -2 9 11.73 8.69
 -15 -2 9 24.08 21.22
 -15 2 -9 19.27 19.65
 -15 -2 -10 1.01 15.82
 15 -2 10 9.52 17.96
 -15 -2 10 -4.88 11.14
 -15 -2 10 0.5 26.9
 -15 2 -10 6.01 17.42
 -15 -2 -11 9.66 16.23
 15 -2 11 -8.87 19.36
 -15 -2 11 -1.13 18.68
 -15 2 -11 2.39 18.1
 -15 -2 -12 20.73 30.81
 15 -2 12 -5.18 34.71
 -15 2 -12 12.11 21.25
 -15 -2 12 4.84 21.97
 15 -2 13 14.27 24.22
 -15 -2 -13 8.1 19.87
 -15 -2 13 -2.36 22.71
 -15 2 -13 10.87 21.94
 15 -2 14 26.11 26.92
 -15 -2 -14 5.31 21.94
 -15 -2 14 20.68 24.96
 -15 2 -14 6.71 24.31
 15 -2 15 8.91 23.65
 -15 -2 -15 -7.13 19.54
 -15 -2 15 30.32 33.65
 -15 2 -15 -5.85 21.94
 15 -2 16 41.46 45.67
 -15 -2 -16 17.94 24.06
 -15 2 16 22.03 27.48
 -15 -2 16 5.4 27.91
 -15 2 -16 12.96 27.28
 15 -2 17 0.7 32.12
 -15 2 17 29.66 28.7
 -15 -2 -17 23.99 40.8
 -15 -2 17 16.99 29.8
 -15 2 -17 39.34 28.88
 -15 -2 -18 -15.15 22.48
 15 -2 18 -6.32 24.71
 -15 2 18 9.5 35.18
 -15 -2 18 2.18 23.72
 -15 2 -18 17.15 23.5
 15 -2 19 19.15 29.98
 -15 -2 -19 16.88 26.92
 -15 2 19 10.4 28.79
 -15 -2 19 -7.4 28.76
 -15 2 -19 3.67 28.92
 15 -2 20 5.42 33.31
 -15 -2 -20 25.5 29.55
 -15 2 20 4.12 31.8
 -15 -2 20 -4.23 51.83
 -15 2 -20 21.92 31.17
 15 -2 21 18.68 50.39
 -15 -2 -21 5.51 28.81
 -15 2 21 -1.44 30.79
 -15 -2 21 21.72 31.96
 -15 2 -21 1.67 30.38
 15 -2 22 17.8 51.88
 -15 -2 -22 4.19 45.51
 -15 2 22 3.53 29.87
 -15 -2 22 -7.79 32.95
 -15 2 -22 20.62 31.35
 15 -2 23 18.19 34.8
 -15 2 23 9.61 31.35
 -15 -2 -23 18.05 30.32
 -15 -2 23 1.46 35.09
 -15 2 -23 -7.27 33.92
 -15 2 24 21.9 30.59
 15 -2 24 -1.37 32.32
 -15 -2 -24 4.95 29.1
 -15 -2 24 -12.11 33.69
 -15 2 -24 2.14 32.59
 15 -2 25 12.87 35.34
 -15 2 25 2.84 35.16
 -15 -2 -25 4.73 33.8
 -15 -2 25 30.52 61.17
 -15 2 -25 19.94 36.82
 -15 -2 -26 -9.84 28.36
 -15 2 26 -6.1 30.74
 -15 -2 26 6.37 33.83
 -15 2 -26 9.95 30.56
 -16 -2 0 46.77 18.59
 -16 2 0 29.73 27.1
 16 -2 0 44.45 25.39
 -16 -2 0 40.08 31.87
 -16 -2 -1 12.67 16.68
 -16 -2 -1 7.76 16.29
 -16 2 1 17.06 14.76
 16 -2 1 51.34 20.98
 -16 -2 1 20.68 14.38
 -16 2 -1 -7.88 16.27
 -16 -2 1 22.08 17.1
 16 -2 -1 17.38 21.43
 -16 -2 -2 21.4 17.6
 -16 -2 -2 16.11 16.43
 16 -2 2 13.3 22.08
 -16 2 2 25.86 21.63
 -16 2 -2 9.09 27.68
 -16 -2 2 21.13 18.68
 -16 -2 2 27.39 22.21
 16 -2 -2 36.06 22.75
 -16 -2 -3 -1.06 13.91
 -16 -2 -3 10.04 15.64
 -16 2 3 9.97 11.97
 16 -2 3 10.6 19.06
 -16 -2 3 16.95 17.19
 -16 2 -3 15.96 16.77
 16 -2 -3 -5.85 19.87
 -16 -2 -4 -13.57 23.36
 16 -2 4 -1.06 29.3
 -16 -2 -4 17.8 18.93
 -16 -2 4 0.92 16.02
 -16 -2 4 14.61 16.79
 -16 2 -4 1.4 16.65
 16 -2 -4 -3.92 19.78
 -16 -2 -5 15.55 16.99
 -16 -2 -5 4.16 14.52
 16 -2 5 1.98 18.91
 -16 -2 5 -3.89 9.36
 -16 -2 5 9.9 25.66
 -16 2 -5 3.71 17.26
 16 -2 -5 4.21 19.18
 -16 -2 -6 7.79 16.56
 -16 -2 -6 9.23 11.64
 16 -2 6 1.64 20.62
 -16 -2 6 12.11 9.9
 -16 2 -6 -10.78 30.68
 -16 -2 6 2.61 19.33
 -16 -2 -7 21.54 16.7
 -16 -2 -7 7.31 10.92
 16 -2 7 0.32 31.89
 -16 -2 7 -0.63 9.32
 -16 -2 7 5.31 20.08
 -16 2 -7 17.38 18.25
 16 -2 8 33.35 25.07
 -16 -2 -8 11.37 19.9
 -16 -2 -8 13.23 12.45
 -16 -2 8 17.85 10.69
 -16 2 -8 32.93 21.38
 -16 -2 8 25.05 23.43
 -16 -2 -9 -6.01 17.76
 16 -2 9 -3.69 21.81
 -16 -2 9 23.5 20.71
 -16 2 -9 8.89 19.15
 -16 -2 -10 3.83 29.57
 16 -2 10 0.77 23.25
 -16 2 -10 13.28 20.86
 -16 -2 10 10.6 34.64
 -16 -2 -11 10.33 20.55
 16 -2 11 21.22 37.38
 -16 2 -11 19.56 23.32
 -16 -2 11 7.36 23.29
 -16 -2 -12 9 20.39
 16 -2 12 14.18 23.18
 -16 -2 12 6.44 23.54
 -16 2 -12 4.19 23.34
 -16 -2 -13 2.25 19.74
 16 -2 13 -8.3 22.64
 -16 -2 13 16.02 22.51
 -16 2 -13 5.6 22.66
 -16 -2 -14 8.87 19.72
 16 -2 14 -4.01 23.23
 -16 -2 14 5.38 23.32
 -16 2 -14 -2.66 22.93
 16 -2 15 -1.8 41.43
 -16 2 15 38.8 39.75
 -16 -2 -15 -2.81 21.9
 -16 -2 15 -8.82 39.9
 -16 2 -15 15.6 25.12
 16 -2 16 -1.51 30.47
 -16 -2 -16 12.78 43.15
 -16 2 16 16.9 28.4
 -16 -2 16 24.96 29.15
 -16 2 -16 25.66 29.08
 -16 2 17 4.61 24.22
 -16 -2 -17 2.75 22.82
 16 -2 17 25.57 26
 -16 -2 17 -2.97 24.69
 -16 2 -17 -23.2 24.64
 16 -2 18 14.45 32.16
 -16 -2 -18 10.35 28.85
 -16 2 18 16.74 45.89
 -16 -2 18 15.19 30.5
 -16 2 -18 10.8 30.2
 16 -2 19 26.29 31.13
 -16 -2 -19 5.49 27.46
 -16 2 19 -12.49 29.75
 -16 -2 19 -2.21 29.71
 -16 2 -19 15.96 29.78
 16 -2 20 51.77 50.91
 -16 -2 -20 28.11 28.16
 -16 2 20 -26.65 31.73
 -16 -2 20 -20.91 47.98
 -16 2 -20 9.86 30.83
 16 -2 21 -6.37 33.42
 -16 -2 -21 7.58 46.57
 -16 2 21 23.43 50.01
 -16 -2 21 -10.4 33.49
 -16 2 -21 25.88 31.91
 16 -2 22 11.68 35.29
 -16 2 22 1.31 33.08
 -16 -2 -22 -11.19 31.55
 -16 2 -22 37.9 34.39
 -16 -2 22 21.94 36.6
 16 -2 23 9.77 35.52
 -16 -2 -23 6.3 31.49
 -16 2 23 2.81 33.56
 -16 -2 23 19.54 37.81
 -16 2 -23 12.96 35.02
 16 -2 24 31.04 37.2
 -16 2 24 -12.04 35.45
 -16 -2 -24 15.3 33.89
 -16 2 -24 45.87 37.92
 -16 -2 24 -16.41 39.12
 -16 2 25 -10.89 32.34
 -16 -2 -25 -21.76 30.25
 -16 2 -25 32.7 33.69
 -16 -2 25 41.3 54.08
 -17 -2 0 -11.19 23.38
 -17 2 0 -1.78 25.61
 17 -2 0 -26.09 22.35
 -17 -2 0 -6.3 26.49
 -17 -2 -1 6.64 22.21
 17 -2 1 15.78 21.29
 -17 -2 -1 -0.34 16.14
 -17 -2 1 10.85 16.92
 -17 -2 1 1.67 21
 -17 2 -1 10.11 15.66
 17 -2 -1 10.56 21.13
 -17 -2 -2 -2.48 14.34
 -17 -2 -2 -7.67 13.64
 17 -2 2 27.3 29.84
 -17 -2 2 13.14 12.09
 -17 2 -2 12.81 15.82
 17 -2 -2 -7.36 20.05
 -17 -2 2 -5.2 16.61
 -17 -2 -3 14.34 13.44
 -17 -2 -3 -6.35 13.73
 17 -2 3 -8.48 18.34
 -17 -2 3 -4.05 11.25
 -17 -2 3 -1.85 16.14
 -17 2 -3 0.95 24.01
 17 -2 -3 22.66 19.83
 -17 -2 -4 8.78 15.08
 -17 -2 -4 -8.55 13.32
 17 -2 4 2.66 19
 -17 2 -4 7.02 17.15
 17 -2 -4 17.19 19.63
 -17 -2 4 -6.19 17.58
 -17 -2 4 2.52 10.96
 -17 -2 -5 4.95 16.43
 -17 -2 -5 0.68 20.46
 17 -2 5 7.72 20.57
 -17 -2 5 0.25 11.21
 -17 -2 5 26.11 30
 -17 2 -5 4.88 19.51
 -17 -2 5 32.75 30.5
 17 -2 6 2.86 22.71
 -17 -2 -6 13.91 18.16
 -17 -2 -6 23.7 20.46
 -17 2 -6 9.52 21.74
 -17 -2 6 -6.37 21.99
 -17 -2 -7 6.75 28.67
 -17 -2 -7 13.35 13.82
 17 -2 7 5.51 22.57
 -17 2 -7 18.79 34.98
 -17 -2 7 -2.61 22.28
 -17 -2 -8 -11.3 29.06
 17 -2 8 9.07 23.56
 -17 2 -8 50.93 33.58
 -17 -2 8 7.63 23.16
 -17 -2 -9 5.76 18.43
 17 -2 9 -4.03 34.84
 -17 2 -9 1.1 21.49
 -17 -2 9 14.4 23.02
 -17 -2 -10 5.36 17.76
 17 -2 10 9.45 22.33
 -17 -2 10 0.9 34.14
 -17 2 -10 -10.62 20.57
 -17 -2 -11 1.76 19.2
 17 -2 11 -11.25 23.77
 -17 -2 11 22.15 22.62
 -17 2 -11 -2.43 22.42
 -17 -2 -12 -5.63 20.57
 17 -2 12 9.21 24.71
 -17 -2 12 18.34 24.1
 -17 2 -12 4.48 24.06
 -17 -2 -13 12.63 22.8
 17 -2 13 -3.33 43.03
 -17 -2 13 28.34 26.78
 -17 2 -13 -3.98 27.14
 -17 -2 -14 13.62 31.85
 17 -2 14 8.28 22.19
 -17 -2 14 -10.24 22.8
 -17 2 -14 -5.15 22.55
 -17 2 15 -12.6 25.3
 -17 -2 -15 10.49 22.98
 17 -2 15 7.31 24.55
 -17 -2 15 3.8 39.63
 -17 2 -15 -0.2 25.36
 -17 2 16 5.02 24.01
 -17 -2 -16 19.33 22.73
 17 -2 16 9.48 23.02
 -17 -2 16 -20.82 24.85
 -17 2 -16 -19.58 24.58
 -17 2 17 12.51 28.11
 -17 -2 -17 16.18 26.36
 17 -2 17 -0.59 26.92
 -17 -2 17 -9.61 29.12
 -17 2 -17 3.06 28.9
 -17 2 18 13.8 53.61
 -17 -2 -18 24.42 31.53
 17 -2 18 8.89 48.97
 -17 -2 18 19.56 34.64
 -17 2 -18 13.89 34.12
 17 -2 19 13.91 35.45
 -17 -2 -19 13.39 33.02
 -17 2 19 22.6 36.75
 -17 -2 19 17.38 35.22
 -17 2 -19 38.76 36.06
 17 -2 20 13.44 32.18
 -17 -2 -20 19.78 45.85
 -17 2 20 12.78 32.88
 -17 -2 20 -3.15 51.63
 -17 2 -20 -5.47 33.02
 17 -2 21 17.35 35.34
 -17 2 21 30.05 56.27
 -17 -2 -21 3.58 32.84
 -17 -2 21 11.32 38.35
 -17 2 -21 19.02 36.53
 17 -2 22 -5.38 29.66
 -17 -2 -22 1.73 29.17
 -17 2 22 -12.06 30.59
 -17 -2 22 22.15 33.65
 -17 2 -22 13.1 32.59
 -17 2 23 14.97 36.08
 -17 -2 -23 -6.98 33.74
 -17 -2 23 16.61 39.77
 -17 2 -23 37.92 37.92
 -18 -2 0 1.46 14.54
 -18 -2 0 14.85 17.38
 18 -2 0 18.88 36.64
 -18 -2 -1 18.61 16.52
 18 -2 1 39.86 25.77
 -18 -2 -1 38.28 30.65
 -18 -2 1 10.92 15.35
 -18 -2 1 32.5 20.3
 18 -2 -1 2.93 26.96
 -18 -2 -2 26.11 16.72
 -18 -2 -2 -2.63 15.37
 18 -2 2 2.97 22.66
 -18 -2 2 -0.02 12.81
 -18 2 -2 8.51 19.29
 18 -2 -2 2.77 23.5
 -18 -2 2 14.18 18.97
 -18 -2 -3 10.62 21.81
 -18 -2 -3 -2.21 14.13
 18 -2 3 11.12 19.72
 18 -2 -3 7.45 20.37
 -18 -2 3 -2.52 11.32
 -18 -2 3 -2.86 16.95
 -18 2 -3 -10.53 16.7
 -18 -2 -4 -1.42 26.24
 18 -2 4 21.4 23
 -18 -2 -4 -3.24 16.02
 -18 -2 4 20.62 32.57
 -18 2 -4 42.29 31.33
 -18 -2 -5 5.09 16.97
 -18 -2 -5 6.19 17.98
 18 -2 5 13.1 23.16
 -18 -2 5 46.7 34.64
 -18 2 -5 4.59 21.79
 -18 -2 -6 12.85 20.21
 18 -2 6 18.82 25.39
 -18 -2 6 12.9 24.85
 -18 2 -6 28.79 24.94
 -18 -2 -7 -1.4 17.42
 18 -2 7 17.65 32.72
 -18 -2 7 11.84 22.51
 -18 2 -7 -6.05 21.97
 -18 -2 -8 2.61 16.97
 18 -2 8 -15.55 20.73
 -18 -2 8 11.25 21.56
 -18 2 -8 0.25 21.13
 -18 -2 -9 -15.42 17.98
 18 -2 9 12.29 21.43
 -18 -2 9 0.95 22.73
 -18 2 -9 18.97 35.31
 -18 2 -9 9.27 31.78
 -18 -2 -10 -10.35 21.31
 18 -2 10 42.31 25.27
 -18 2 -10 -18.52 39.12
 -18 -2 10 28.07 42.33
 -18 -2 -11 -0.59 31.58
 -18 2 -11 9.75 24.04
 -18 -2 11 -21.56 25.16
 -18 -2 -12 1.64 37.79
 18 -2 12 1.94 27.5
 -18 -2 12 10.65 27.35
 -18 2 -12 13.84 26.96
 -18 -2 -13 1.98 24.53
 18 -2 13 0.59 27.44
 -18 -2 13 8.71 27.59
 -18 2 -13 17.49 27.46
 -18 -2 -14 13.21 22.82
 18 -2 14 -20.41 24.44
 -18 2 14 13.44 38.89
 -18 -2 14 0.05 25.45
 -18 2 -14 -1.62 24.26
 -18 2 15 27.57 29.19
 -18 -2 -15 -8.44 26.74
 18 -2 15 -13.62 29.33
 -18 -2 15 24.91 46.03
 -18 2 -15 18.97 29.42
 -18 2 16 4.34 26.54
 -18 -2 -16 -9.39 25.59
 18 -2 16 -0.56 42.15
 -18 -2 16 -8.26 27.86
 -18 2 -16 5.56 28.11
 -18 2 17 -3.24 53.61
 -18 -2 -17 29.84 32.48
 18 -2 17 1.94 49.56
 -18 -2 17 22.42 35.29
 -18 2 -17 27.91 35.47
 -18 2 18 14.52 30.2
 -18 -2 -18 0.59 41.95
 18 -2 18 -3.51 27.3
 -18 -2 18 1.91 30.9
 -18 2 -18 2.93 30.59
 -18 2 19 -13.14 30.61
 -18 -2 -19 -2.88 27.01
 18 -2 19 9.27 26.65
 -18 -2 19 19.81 30.02
 -18 2 -19 -3.76 30.36
 -18 -2 -20 24.96 32.54
 -18 2 20 12.63 36.93
 18 -2 20 5.51 31.33
 -18 -2 20 -3.49 36.08
 -18 2 -20 27.89 35.9
 -18 2 21 2.05 50.28
 -18 -2 -21 -5.56 29.8
 -18 -2 21 -15.78 54.53
 -18 2 -21 -3.51 33.87
 -19 -2 0 -5.02 13.32
 19 -2 0 5.31 22.66
 -19 -2 0 0.68 16.63
 -19 -2 -1 0.02 13.28
 -19 -2 -1 -8.57 16.07
 19 -2 1 11.57 34.34
 19 -2 -1 20.95 22.37
 -19 -2 1 -1.78 17.19
 -19 -2 -2 0.88 15.42
 19 -2 2 11.34 24.33
 -19 -2 -2 8.42 28.16
 -19 -2 2 10.47 19.9
 19 -2 -2 4.82 25.21
 -19 -2 -3 2.18 15.93
 -19 -2 -3 22.08 18.82
 19 -2 3 -19.06 24.19
 -19 -2 3 7.02 20.5
 -19 -2 -4 12.87 18.01
 19 -2 4 11.28 26.38
 -19 -2 4 3.58 36.08
 -19 -2 4 13.48 34.73
 -19 -2 -5 -4.41 16.7
 19 -2 5 26.76 36.28
 -19 -2 5 -3.26 22.03
 -19 2 -5 24.22 33.53
 -19 -2 -6 8.78 19.13
 19 -2 6 8.37 24.8
 -19 2 -6 15.69 23.7
 -19 -2 6 -2.54 24.31
 -19 -2 -7 5.94 33.29
 19 -2 7 8.78 26.47
 -19 -2 7 34.37 27.64
 -19 2 -7 18.12 27.39
 -19 -2 -8 0.9 29.71
 19 -2 8 3.42 23.54
 -19 -2 8 -1.49 24.62
 -19 2 -8 -14.31 23.77
 -19 -2 -9 -2.34 22.6
 19 -2 9 2.34 24.22
 -19 -2 9 -8.96 27.1
 -19 2 -9 -16.61 26.51
 -19 -2 -10 -0.95 23.07
 19 -2 10 17.67 39.66
 -19 -2 10 5.9 40.24
 -19 2 -10 4.12 27.26
 -19 -2 -11 9.14 24.28
 19 -2 11 -2 26.2
 -19 2 -11 34.07 43.84
 -19 -2 11 -5.76 27.12
 -19 -2 -12 16.05 26.67
 19 -2 12 9.75 28.22
 -19 -2 12 -5.76 29.98
 -19 2 -12 36.73 49.2
 -19 -2 -13 1.89 24.94
 19 -2 13 -4.41 25.95
 -19 -2 13 15.1 28.47
 -19 2 -13 5.63 42.47
 -19 -2 -14 -2.48 24.13
 -19 2 14 18.59 27.21
 19 -2 14 14.18 38.28
 -19 -2 14 -22.19 27.8
 -19 2 -14 -5.33 26.4
 -19 -2 -15 36.03 49.63
 -19 2 15 33.44 35.2
 19 -2 15 5.11 33.02
 -19 -2 15 -14.25 56.18
 -19 2 -15 32 34.71
 -19 2 16 9.77 31.35
 -19 -2 -16 -14.11 44.02
 19 -2 16 -8.1 30.2
 -19 -2 16 1.98 32.59
 -19 2 -16 42.47 31.91
 -19 -2 -17 -0.74 26.29
 -19 2 17 -9.9 47.2
 19 -2 17 -30.81 27.03
 -19 -2 17 11.95 29.24
 -19 2 -17 20.44 28.83
 -19 -2 -18 -12.74 25.88
 -19 2 18 16.29 30.14
 19 -2 18 10.15 25.72
 -19 -2 18 -5.02 29.71
 -19 2 -18 -10.38 29.01
 -20 -2 0 -2.97 18.48
 20 -2 0 8.82 24.82
 20 -2 1 -17.85 26.47
 -20 -2 1 15.3 19.96
 20 -2 -1 6.95 26.87
 20 -2 2 -10.29 26.04
 -20 -2 2 0.54 20.5
 -20 -2 -3 3.69 28.38
 20 -2 3 -13.12 42.49
 -20 -2 3 -21.52 35.11
 -20 -2 -4 26.67 33.85
 20 -2 4 21.22 31.28
 -20 -2 4 27.35 27.01
 -20 -2 -5 16.92 20.86
 20 -2 5 20.5 28.47
 -20 -2 5 -0.79 25.5
 -20 -2 -6 11.46 18.03
 20 -2 6 2.61 23.9
 -20 -2 6 -17.71 22.46
 -20 -2 -7 -1.58 20.73
 20 -2 7 9.07 41.48
 -20 -2 7 15.8 26
 -20 -2 -8 -7.76 19.67
 20 -2 8 -4.21 23.11
 -20 2 -8 7.61 24.04
 -20 -2 8 6.01 24.06
 -20 -2 -9 17.15 23.65
 20 -2 9 2.63 27.14
 -20 2 -9 -0.77 27.39
 -20 -2 9 20.3 45.22
 -20 -2 -10 8.67 23.86
 20 -2 10 10.67 25.86
 -20 -2 10 1.87 27.32
 -20 2 -10 1.01 27.12
 -20 -2 -11 1.06 22.08
 20 -2 11 2.32 22.87
 -20 -2 11 -26.92 25.43
 -20 2 -11 20.8 25.45
 -20 -2 -12 32.86 35.79
 20 -2 12 4.46 36.21
 -20 -2 12 -10.26 26.87
 -20 2 -12 -7.9 26.67
 -20 2 13 8.03 29.42
 -20 -2 -13 41.84 38.01
 20 -2 13 -3.42 25.72
 -20 -2 13 -17.94 28.94
 -20 2 -13 1.53 29.24
 -20 2 14 -0.47 27.8
 -20 -2 -14 -10.69 23.95
 20 -2 14 1.42 24.51
 -20 -2 14 19.78 28.38
 -20 2 -14 -1.06 29.01
 -20 2 15 4.88 31.33
 -20 -2 -15 -4.73 26.78
 20 -2 15 6.12 26.74
 -20 -2 15 22.26 49.11
 -20 2 -15 14.97 50.59
 21 -2 1 -2.86 27.14
 21 -2 2 14.11 30.16
 -21 -2 2 2.77 38.53
 21 -2 3 -6.68 29.03
 -21 -2 3 15.51 23.25
 21 -2 4 -21.18 28.67
 -21 -2 4 4.12 23.74
 21 -2 5 -4.55 45.85
 -21 -2 5 14.38 25.54
 -21 -2 -6 11.88 19.78
 21 -2 6 13.64 26.38
 -21 -2 6 -18.86 23.86
 -21 -2 -7 -0.9 20.01
 21 -2 7 4.59 25.91
 -21 -2 7 12 25.68
 -21 -2 -8 46.97 38.94
 21 -2 8 -3.17 31.49
 -21 -2 8 35.61 48.23
 -21 -2 -9 -11.86 31.17
 21 -2 9 13.3 25.32
 -21 -2 9 -6.77 38.04
 -21 -2 -10 6.57 37.16
 21 -2 10 2.14 43.87
 -21 -2 10 17.42 28.85
 -21 -2 -11 6.12 22.78
 21 -2 11 1.49 26.29
 -21 -2 11 8.89 28.63
 22 -2 2 10.53 36.08
 0 -3 0 5.24 9.59
 0 3 0 -0.56 1.1
 0 3 0 1.98 5.63
 0 -3 0 -2.07 8.64
 0 3 1 -6.26 6.68
 0 3 -1 7.25 7.29
 0 -3 -1 14.38 14.67
 0 -3 1 29.21 11.39
 0 -3 1 -1.46 9.99
 0 -3 -1 18.41 10.11
 0 3 2 6.55 6.37
 0 3 -2 11.37 7.49
 0 -3 2 9.93 8.33
 0 -3 -2 -0.68 6.62
 0 -3 -2 12.58 9.81
 0 3 3 -1.62 1.13
 0 -3 -3 -2.88 5
 0 3 -3 -11.39 9.7
 0 3 3 0.05 5.33
 0 -3 -3 0.18 0.99
 0 3 -3 4.28 6.62
 0 -3 3 -0.95 7.58
 0 -3 -4 1.76 5.13
 0 3 -4 13.68 10.65
 0 3 -4 5.02 8.06
 0 3 4 1.55 5.54
 0 -3 4 12.04 8.71
 0 -3 -5 4.82 4.64
 0 -3 -5 -2.14 1.62
 0 3 5 0.88 1.69
 0 -3 5 -4.3 8.33
 0 3 -5 6.84 10.17
 0 3 5 0.14 4.73
 0 -3 6 -2.77 8.67
 0 3 6 1.85 1.26
 0 3 6 0.92 4.93
 0 -3 -6 3.6 4.66
 0 3 -6 -9.61 11.68
 0 -3 7 0.29 9.48
 0 3 7 3.06 5.45
 0 -3 -7 4.41 7.22
 0 3 -7 12.36 18.37
 0 3 8 1.26 1.33
 0 3 8 -1.15 4.82
 0 -3 -8 0.72 4.3
 0 -3 8 -10.33 9.25
 0 3 -8 7.56 11.77
 0 3 9 0.34 1.4
 0 -3 -9 -1.33 4.3
 0 -3 9 7.16 10.11
 0 3 9 1.96 7.47
 0 3 -9 -4.79 11.39
 0 3 -10 6.62 10.38
 0 3 10 -0.23 1.19
 0 -3 -10 -4.84 5.11
 0 -3 10 7.92 10.2
 0 -3 -10 3.51 7.67
 0 3 10 2.63 8.1
 0 3 10 1.31 1.51
 0 3 -11 13.23 11.64
 0 -3 -11 11.12 13.17
 0 3 11 -1.17 6.08
 0 -3 11 4.23 12.06
 0 3 -12 -16.47 11.95
 0 -3 12 9.7 11.86
 0 3 12 4.01 6.28
 0 -3 -12 3.13 8.6
 0 3 -13 4.14 22.17
 0 3 13 -0.81 5.27
 0 -3 13 22.12 20.1
 0 -3 -13 6.91 8.35
 0 3 13 2.48 6.48
 0 3 -14 13.28 14.65
 0 -3 14 1.19 11.64
 0 -3 -14 15.48 12.85
 0 3 14 -5.15 5.72
 0 3 14 2.95 6.64
 0 3 15 -6.26 7.67
 0 3 -15 0.92 15.48
 0 -3 15 1.35 13.26
 0 -3 -15 14.49 8.91
 0 3 15 2.12 9.18
 0 3 16 4.3 9.79
 0 3 -16 -21.76 16.59
 0 -3 16 19.42 13.77
 0 -3 -16 5.56 8.57
 0 3 16 -4.66 8.26
 0 3 -17 13.08 18.91
 0 3 17 16.11 7.67
 0 -3 17 -0.23 16.14
 0 -3 -17 -6.86 10.13
 0 3 -18 4.07 30.56
 0 -3 18 7.02 16.18
 0 -3 -18 10.17 10.33
 0 3 18 3.26 11.82
 0 3 19 -2.27 7.7
 0 -3 19 10.8 15.48
 0 -3 -19 6.21 9.77
 0 3 -19 -3.71 26.15
 0 3 -20 -2.9 18.3
 0 -3 20 2.79 16.2
 0 -3 -20 -12.4 11.01
 0 3 20 11.39 8.3
 0 3 21 9.39 9.03
 0 -3 21 7.54 18.1
 0 3 -21 -10.51 19.76
 0 -3 -21 -2.68 12.38
 0 -3 22 20.26 20.12
 0 -3 -22 16.77 19.72
 0 3 -22 16.32 22.55
 0 3 22 1.28 10.74
 0 3 -23 2.32 20.95
 0 3 23 -5.42 10.47
 0 -3 -23 3.62 11.97
 0 -3 23 17.19 19.24
 0 -3 -24 7.92 22.35
 0 3 -24 3.17 25.61
 0 -3 24 19.74 23.43
 0 3 24 13.28 20.28
 0 -3 -25 18.21 13.8
 0 -3 25 4.01 22.57
 0 3 -25 -4.37 25.93
 0 3 25 -2.81 12.81
 0 -3 -26 13.48 14.11
 0 -3 26 -3.62 23.09
 0 3 -26 0.34 26.47
 0 3 26 -8.87 19.47
 0 -3 27 7.85 24.1
 0 -3 -27 1.01 15.66
 0 3 27 -2.63 14.4
 0 3 -27 22.39 26.85
 0 3 -28 -2.54 27.46
 0 3 28 4.95 14.72
 0 -3 28 22.46 24.64
 0 -3 -28 -8.71 15.64
 0 3 -29 11.01 33.13
 0 -3 -29 12.51 28.92
 0 -3 29 4.91 44.45
 0 3 29 5.47 27.08
 0 3 -30 20.98 33.89
 0 -3 -30 -8.8 18.57
 0 -3 30 5.15 48.01
 0 3 30 -20.21 24.04
 0 3 -31 4.82 39.9
 0 -3 31 38.46 36.69
 0 -3 -31 13.23 21.27
 0 -3 -32 6.48 30.14
 0 -3 32 -4.86 32.9
 0 3 -32 18.7 56
 0 -3 -33 4.57 20.39
 0 3 -33 -15.33 61.58
 0 -3 33 21.07 35.83
 0 -3 -34 24.55 23.79
 0 3 -34 56.54 80.71
 0 -3 34 13.59 43.46
 0 -3 -35 -4.66 33.04
 0 3 -35 40.76 45.51
 0 -3 35 1.33 38.64
 -1 3 0 3.11 6.71
 -1 3 0 1.06 1.17
 1 -3 0 3.22 6.62
 1 3 0 0.45 5.4
 1 -3 0 3.76 8.96
 -1 -3 0 6.53 6.1
 -1 -3 -1 60.3 9.86
 -1 3 1 67.86 16.7
 1 3 -1 51.88 9.59
 1 -3 1 90.3 11.88
 1 -3 1 86.74 15.69
 -1 -3 1 51.34 11.28
 1 -3 -1 65.92 11.66
 -1 3 -1 67.18 12.31
 -1 3 -1 113.82 23.23
 1 -3 -1 69.68 21.67
 1 3 1 62.64 9.41
 -1 3 2 21.49 8.17
 1 3 -2 13.98 8.03
 1 -3 2 12.29 9.59
 -1 -3 -2 26.94 9.84
 1 -3 -2 18.16 7.52
 -1 -3 2 24.51 8.76
 -1 3 -2 21.81 9.07
 1 -3 -2 9.25 11.03
 -1 3 -2 25.75 12.02
 1 3 2 17.92 6.35
 -1 3 3 5.69 6.37
 1 -3 3 -11.73 8.94
 1 3 -3 2.66 1.35
 1 3 -3 5.58 6.75
 -1 -3 -3 -0.61 5.13
 -1 -3 3 3.85 7.61
 1 -3 -3 10.04 8.73
 1 -3 -3 13.48 6.12
 -1 3 -3 3.98 12.2
 -1 3 -3 18.41 10.49
 1 3 3 3.6 5.22
 -1 -3 -4 130.81 13.5
 1 -3 4 115.71 26
 1 3 -4 60.93 13.68
 1 3 -4 137.45 19.24
 -1 3 4 106.25 12
 1 3 4 119.78 10.35
 1 -3 -4 138.89 11.7
 -1 -3 4 113.95 14.9
 -1 3 -4 95.72 16.61
 -1 3 -4 109.11 20.95
 -1 -3 -5 47.96 6.19
 -1 3 5 33.33 8.48
 1 -3 5 28.27 13.23
 1 3 -5 48.95 14.85
 1 3 -5 30.25 11.19
 1 3 5 47.96 7.11
 -1 -3 5 50.37 17.58
 1 -3 -5 39.75 8.26
 -1 3 -5 60.95 16.2
 -1 3 6 21.7 8.06
 1 -3 6 34.01 19.02
 1 3 -6 18.21 14.02
 -1 -3 -6 28.92 5.04
 -1 -3 6 22.21 11.39
 1 3 6 22.57 5.72
 1 -3 -6 13.82 10.56
 -1 3 -6 16.65 13.37
 -1 3 7 8.01 6.35
 1 -3 7 10.06 11.64
 1 3 -7 11.79 19.81
 -1 -3 -7 8.73 6.41
 1 3 7 5.9 4.55
 -1 -3 7 6.21 10.4
 1 -3 -7 18.1 9.14
 -1 3 -7 8.82 12.72
 -1 3 8 6.35 9
 1 -3 8 -4.77 10.47
 -1 3 8 1.46 1.85
 1 3 -8 8.03 11.39
 -1 -3 -8 2.59 3.6
 -1 3 -8 -0.74 10.78
 1 -3 -8 0.2 1.69
 1 3 8 2.97 3.98
 -1 -3 8 4.34 14.61
 1 3 8 -0.77 2.21
 1 -3 -8 3.33 5
 -1 3 9 1.98 6.64
 -1 -3 -9 5.09 3.87
 1 -3 9 10.13 11.1
 1 3 -9 23.09 19.81
 -1 -3 9 0.95 9.95
 -1 3 -9 5.51 11.7
 1 3 9 3.11 7.67
 1 -3 -9 8.69 5.94
 -1 3 10 8.94 7.67
 1 -3 10 10.26 11.97
 -1 -3 -10 -2.32 10.31
 1 3 -10 17.15 14.07
 1 3 10 18.37 7.72
 -1 3 -10 9.43 20.44
 -1 -3 10 10.26 11.5
 1 -3 -10 14.9 6.5
 -1 3 11 3.24 7.99
 1 -3 11 7.38 12.58
 -1 -3 -11 19.11 9.81
 1 3 -11 3.6 14.31
 1 3 11 7.31 8.24
 -1 3 -11 30.45 15.46
 -1 -3 11 5.81 11.93
 1 -3 -11 8.6 8.87
 -1 3 12 27.77 9.39
 1 3 -12 37.27 22.42
 1 -3 12 2.45 14.81
 -1 -3 -12 28.99 11.28
 1 3 12 16.14 9.97
 1 3 12 18.23 5.27
 -1 3 -12 26.94 17.67
 -1 -3 12 23.43 13.95
 1 -3 -12 17.65 10.35
 1 -3 13 27.08 27.01
 1 3 -13 48.52 16.68
 -1 -3 -13 35.54 12.36
 -1 3 13 31.01 10.33
 1 3 13 25.93 7.88
 -1 -3 13 13.64 16.38
 -1 3 -13 24.06 20.32
 1 -3 -13 37.81 16.29
 1 3 13 32.18 6.46
 1 3 -14 -1.87 15.48
 -1 -3 -14 37.81 17.83
 1 -3 14 23 16.38
 -1 3 14 25.57 15.06
 -1 3 14 18.48 8.08
 1 3 14 17.4 6.01
 -1 3 -14 37.7 19.18
 -1 -3 14 8.12 23
 1 -3 -14 25.81 10.02
 -1 -3 14 5.56 24.22
 1 3 14 12.69 7.29
 -1 3 15 19.47 8.8
 1 3 -15 34.14 16.34
 -1 -3 -15 6.82 11.97
 1 -3 15 26.49 17.4
 -1 -3 15 16.45 16.54
 1 -3 -15 24.96 10.38
 1 3 15 15.71 6.55
 -1 3 -15 33.4 27.14
 1 -3 16 5.63 13.23
 -1 -3 -16 -9 8.73
 -1 3 16 0.86 10.58
 1 3 16 -0.43 5.02
 -1 -3 16 8.57 12.78
 -1 3 -16 -12.58 14.07
 1 -3 -16 2.32 11.57
 1 3 16 3.56 6.44
 1 -3 17 -4.61 16.97
 1 3 -17 13.5 18.68
 -1 -3 -17 20.32 10.85
 -1 3 17 6.84 8.35
 -1 -3 17 9.03 16.63
 1 -3 -17 13.21 9.57
 -1 3 -17 -0.92 17.83
 1 3 17 9 10.31
 1 3 17 -1.78 13.28
 1 -3 18 4.19 15.64
 1 3 -18 10.6 18.39
 -1 -3 -18 -11.95 10.47
 -1 3 18 5.51 12.63
 -1 -3 18 3.53 16.16
 1 -3 -18 -6.23 9.21
 1 3 18 3.02 6.5
 -1 3 -18 10.24 17.24
 1 3 18 12.78 7.94
 1 3 -19 27.98 21.04
 -1 -3 -19 23.2 12.04
 -1 3 19 0.63 10.24
 1 -3 19 0.36 19.02
 -1 -3 19 6.86 18.82
 1 -3 -19 12.96 10.67
 1 3 19 11.52 12.27
 -1 3 -19 14.34 20.66
 -1 3 20 21.25 12.09
 1 3 -20 17.8 26.36
 1 -3 20 40.56 23.41
 -1 -3 -20 29.26 15.82
 1 -3 -20 37.79 13.95
 -1 3 -20 36.01 24.51
 -1 -3 20 25.25 22.84
 1 3 20 25.75 10.51
 1 -3 21 13.57 24.73
 1 3 -21 16.83 28.25
 -1 -3 -21 35.76 16.81
 -1 3 21 31.91 12.69
 -1 -3 21 53 24.19
 1 3 21 17.44 17.29
 -1 3 -21 47.04 25.72
 1 -3 -21 33.17 15.01
 1 3 -22 16.32 22.75
 -1 3 22 6.3 10.53
 -1 -3 -22 -0.54 20.8
 1 -3 22 8.33 19.96
 1 -3 -22 7.16 11.32
 1 3 22 -2.12 9.75
 -1 3 -22 -5.63 21.72
 -1 -3 22 2.18 19.54
 -1 3 23 3.44 11.25
 1 3 -23 20.41 24.8
 -1 -3 -23 6.64 13.12
 1 -3 23 9.12 20.91
 1 -3 -23 -9.61 12
 -1 -3 23 22.73 20.62
 1 3 23 3.56 10.33
 -1 3 -23 -3.06 22.8
 1 -3 24 26.96 25.97
 1 3 -24 39.54 28.72
 -1 -3 -24 2.25 16.09
 -1 3 24 9.36 14.29
 -1 -3 24 27.57 38.33
 1 3 24 9.07 13.3
 1 -3 -24 34.07 21.4
 -1 3 -24 18.93 27.77
 -1 3 25 11.64 14.38
 1 3 -25 4.03 29.89
 -1 -3 -25 10.96 15.37
 1 -3 25 18.5 25.23
 1 -3 -25 7.52 13.82
 -1 -3 25 17.04 24.82
 1 3 25 2.25 13.14
 -1 3 -25 17.15 27.37
 1 3 -26 23.97 32
 -1 -3 -26 12.02 16.27
 -1 3 26 15.75 23.56
 1 -3 26 -4.84 26.85
 1 -3 -26 2.52 22.57
 1 3 26 8.57 21.83
 -1 3 -26 19.56 29.17
 -1 -3 26 8.6 25.77
 -1 -3 -27 18.95 25.75
 1 3 -27 9.52 33.4
 1 -3 27 11.3 27.1
 -1 3 27 8.46 16.07
 1 -3 -27 14.2 16.36
 -1 -3 27 -3.29 27.17
 -1 3 -27 14.04 30.59
 1 3 27 -1.85 20.37
 1 3 -28 12.22 33.71
 1 -3 28 32.63 28.16
 -1 -3 -28 -4.55 17.96
 -1 3 28 -1.35 16
 -1 -3 28 7.49 26.6
 1 -3 -28 15.75 16.27
 1 3 28 2.14 20.89
 -1 3 -28 -6.93 30.86
 -1 3 29 7.61 31.96
 1 3 -29 11.14 40.8
 -1 -3 -29 25.21 21.54
 1 -3 29 14.56 33.85
 -1 3 -29 18.28 36.87
 -1 -3 29 23.72 32.34
 1 -3 -29 20.68 19
 1 3 -30 -8.91 36.71
 -1 -3 -30 5.31 29.1
 -1 3 30 8.42 18.16
 1 -3 30 9.09 30.54
 -1 3 -30 6.57 33.13
 -1 -3 30 7.45 28.97
 1 -3 -30 -0.9 16.99
 1 3 -31 19.69 42.4
 -1 -3 -31 21.79 21.72
 1 -3 31 9.7 34.64
 -1 3 31 -1.01 20.32
 -1 -3 31 25.86 33.24
 -1 3 -31 -16.74 38.35
 1 -3 -31 20.82 30.32
 -1 -3 -32 3.13 21.22
 1 3 -32 28.29 43.03
 1 -3 32 5.38 33.98
 -1 3 -32 -5.45 39.07
 1 -3 -32 14.16 19.56
 -1 -3 32 10.24 34.28
 -1 -3 -33 13.89 34.66
 1 -3 33 29.46 36.39
 1 3 -33 12.15 43.55
 -1 -3 33 7.34 35.61
 -1 3 -33 -2.88 40.33
 1 -3 -33 4.59 19.15
 1 3 -34 48.77 47.35
 -1 -3 -34 -7.92 23.43
 1 -3 34 32.99 60.72
 -1 -3 34 25.25 57.55
 -1 3 -34 32.36 43.96
 -1 -3 -35 -4.66 23.07
 1 3 -35 8.57 46.81
 1 -3 35 28.88 59.75
 -1 -3 35 91.26 63.45
 -1 3 -35 20.37 43.42
 -2 3 0 144.69 15.93
 2 -3 0 147.82 16.16
 -2 -3 0 136.12 17.49
 2 3 0 118.25 10.76
 -2 3 0 133.31 17.51
 2 -3 0 140.49 17.69
 2 -3 1 38.53 11.77
 -2 3 1 52.33 15.98
 -2 -3 -1 43.78 7.92
 2 3 -1 36.48 11.75
 2 -3 1 37.99 11.39
 2 -3 -1 41.7 9.93
 -2 3 -1 44.25 11.39
 -2 -3 1 37.52 9.27
 -2 3 -1 63.11 20.48
 2 3 1 39.95 7.2
 2 -3 -1 46.99 12.18
 -2 3 2 1.78 7.72
 2 -3 2 4.25 9.16
 2 3 -2 -1.06 6.57
 -2 -3 -2 12.13 5.29
 2 3 2 14.63 7.45
 2 -3 -2 -0.68 11.41
 -2 -3 2 12.72 6.91
 -2 3 -2 9.05 9.07
 -2 3 -2 1.46 10.94
 2 -3 -2 11.55 9.52
 -2 -3 -3 240.62 17.19
 -2 3 3 238.79 18.01
 2 3 -3 235.24 18.88
 2 -3 3 256.66 23.29
 2 -3 -3 262.9 25.61
 2 -3 -3 260.45 22.51
 -2 -3 3 240.05 19.38
 2 3 3 246.63 12.76
 -2 3 -3 267.69 26.99
 -2 -3 -4 12.2 4.88
 -2 3 4 12.49 7.94
 2 -3 4 19.87 11.03
 2 3 -4 16.47 11.82
 2 3 4 11.12 4.97
 -2 -3 4 19.11 8.78
 2 -3 -4 18.88 9.43
 -2 3 -4 17.19 19.45
 2 -3 -4 13.05 7.58
 -2 -3 -5 2 5.13
 2 3 -5 6.39 9.93
 2 3 -5 -0.23 1.17
 -2 3 5 -0.09 1.17
 -2 3 5 1.26 6.75
 2 -3 5 -6.82 9.41
 2 3 5 1.13 1.33
 2 -3 -5 8.21 5.83
 2 3 5 -1.06 3.42
 2 -3 -5 11.82 7.74
 -2 -3 5 2.52 7.27
 -2 3 -5 7.36 10.04
 -2 3 6 2.63 6.55
 2 -3 6 -2.27 10.38
 -2 -3 -6 8.69 4.79
 2 3 -6 3.76 10.71
 -2 3 -6 13.91 15.6
 2 3 6 1.19 1.55
 2 3 6 6.01 5.9
 -2 -3 6 7.04 8.08
 2 -3 -6 6.55 6.28
 -2 3 7 16.92 8.51
 -2 -3 -7 17.89 3.71
 2 -3 7 18.39 13.23
 2 3 -7 5.74 21.63
 -2 3 -7 30.83 13.21
 2 3 7 21.45 6.95
 -2 -3 7 23.9 10.69
 2 -3 -7 22.53 7.74
 -2 3 8 7.11 7.65
 2 -3 8 9.32 12.56
 2 3 -8 8.46 12.83
 -2 -3 -8 9.25 2.9
 -2 3 -8 13.35 19.06
 2 3 8 7.22 3.74
 -2 -3 8 13.77 10.24
 2 -3 -8 2.72 6.48
 -2 3 9 -4.28 7.02
 -2 3 9 1.33 1.28
 2 -3 9 -2.18 17.19
 -2 -3 -9 -1.78 8.39
 2 3 -9 10.67 17.98
 2 3 9 3.17 4.84
 2 -3 -9 0.45 1.13
 -2 3 -9 3.42 12.65
 -2 -3 9 7.36 9.32
 2 -3 -9 2.81 6.08
 -2 3 10 4.52 11.14
 2 -3 10 7.25 11.77
 -2 3 10 0.79 1.31
 -2 3 10 1.08 1.6
 -2 -3 -10 7.27 13.37
 2 3 -10 -3.2 12.04
 2 3 10 2.12 3.51
 2 -3 -10 0.45 1.19
 -2 3 -10 0.65 12.65
 2 -3 -10 2.09 6.26
 -2 -3 10 -5.76 9.75
 -2 3 11 13.93 8.98
 2 -3 11 26.99 14.11
 2 3 -11 21.88 14.58
 -2 -3 -11 1.26 10.22
 2 3 11 10.87 6.3
 -2 3 -11 6.98 15.84
 2 -3 -11 2.88 8.6
 2 3 11 6.32 3.51
 -2 -3 11 20.48 12.11
 2 -3 12 27.08 23.72
 -2 -3 -12 19.92 10.8
 2 3 -12 13.86 15.48
 2 3 12 14.63 7.45
 -2 3 -12 6.68 23.81
 -2 -3 12 12.51 12.9
 2 3 12 14.27 3.92
 2 -3 -12 8.48 8.87
 2 -3 13 6.01 12.78
 -2 -3 -13 -7.16 9.95
 2 3 -13 6.62 13.5
 2 3 13 5.06 7.2
 -2 -3 13 -14.81 12.33
 -2 3 -13 8.69 14.38
 2 3 13 4.32 3.65
 2 -3 -13 5.56 12.15
 2 -3 14 24.37 15.6
 -2 -3 -14 6.01 12.06
 2 3 -14 14.99 16.43
 2 3 14 14.79 8.98
 -2 3 -14 12.42 17.1
 -2 -3 14 23.07 15.26
 2 -3 -14 14.83 9.03
 2 3 14 15.1 4.5
 -2 3 15 9.63 8.17
 2 3 -15 18.68 14.13
 -2 -3 -15 9.3 11.25
 2 -3 15 23.47 15.01
 -2 3 -15 14.49 16.11
 -2 -3 15 35.16 22.24
 2 -3 -15 3.65 8.37
 2 3 15 3.69 4.82
 2 3 15 4.03 5.72
 2 3 -16 3.04 14.81
 2 -3 16 1.82 15.8
 -2 -3 -16 10.53 11.14
 -2 3 16 10.04 14.04
 -2 -3 16 -7.7 24.33
 2 3 16 5.29 6.55
 -2 3 -16 5.29 17.89
 2 -3 -16 28.4 12.92
 2 3 16 6.75 8.15
 2 3 -17 35.56 16.54
 2 -3 17 18.23 17.44
 -2 -3 -17 -2.86 12.04
 -2 3 17 17.26 10.26
 -2 3 -17 25.25 19
 2 -3 -17 15.46 9.09
 2 3 17 13.32 6.53
 -2 -3 17 1.89 27.14
 2 3 17 3.08 7.56
 2 3 -18 9.3 16.18
 2 -3 18 15.12 16.07
 -2 -3 -18 3.69 11.41
 -2 3 18 2.09 9.16
 -2 3 -18 0.27 28.38
 -2 -3 18 11.97 26.47
 2 -3 -18 7.16 8.42
 2 3 18 2.27 10.38
 2 3 18 5.18 7.22
 2 -3 19 20.5 21.9
 -2 3 19 36.15 20.32
 -2 -3 -19 34.71 15.44
 2 3 -19 42.78 21.45
 -2 -3 19 52.06 23.74
 -2 3 -19 37.9 37.34
 2 -3 -19 56.69 18.79
 2 3 19 42.36 9.5
 2 3 19 23.5 10.53
 2 -3 20 28.13 32.07
 2 3 -20 -8.17 31.01
 -2 -3 -20 19.18 15.6
 -2 3 20 23.95 12.56
 -2 -3 20 20.03 21.4
 -2 3 -20 35.4 23.27
 2 3 20 6.93 15.12
 2 -3 -20 18.61 12.02
 2 -3 21 23.97 32.43
 -2 -3 -21 23.16 15.19
 -2 3 21 5.33 19.49
 2 3 21 10.47 9.88
 -2 3 -21 -3.49 23.09
 2 -3 -21 32.25 18.55
 -2 -3 21 -1.53 21.76
 2 3 -22 80.8 44.02
 2 -3 22 36.98 39.66
 -2 -3 -22 49.65 28.22
 -2 3 22 19.9 14.49
 -2 3 -22 35.49 26.56
 2 -3 -22 16.18 13.5
 -2 -3 22 50.89 26.27
 2 3 22 31.13 11.82
 2 -3 23 33.29 38.22
 2 3 -23 9.25 28.65
 -2 -3 -23 12.24 16.86
 -2 3 23 13.41 21.97
 -2 3 -23 20.35 27.3
 2 -3 -23 19.58 20.73
 2 3 23 30.38 25.39
 -2 -3 23 35.63 25.41
 2 3 -24 32.99 26.11
 -2 -3 -24 10.2 15.19
 2 -3 24 29.19 35.38
 -2 3 24 11.93 13.03
 2 -3 -24 -7.38 11.88
 -2 3 -24 12.49 24.33
 -2 -3 24 5.49 23.02
 2 3 24 -1.87 15.6
 -2 -3 -25 26.18 16.88
 2 -3 25 56.27 39.81
 2 3 -25 13.08 29.93
 -2 3 25 7.97 15.35
 -2 -3 25 9.66 26.29
 2 -3 -25 7.18 13.5
 2 3 25 9.39 18.37
 -2 3 -25 16.27 28
 -2 -3 -26 9.54 16.97
 2 3 -26 26.65 30.86
 2 -3 26 14.65 39.27
 -2 3 26 9.84 16.18
 2 3 26 35.11 20.77
 2 -3 -26 3.6 14.99
 -2 3 -26 -20.86 28.38
 -2 -3 26 -0.05 26.96
 2 -3 27 -4.03 39.68
 -2 -3 -27 -2.93 17.15
 2 3 -27 5.83 31.55
 -2 3 27 13.89 16.47
 2 -3 -27 6.71 14.61
 -2 3 -27 17.49 28.61
 -2 -3 27 28.83 26.87
 2 3 27 -1.4 13.46
 2 3 -28 47.11 33.85
 2 -3 28 20.53 42.13
 -2 -3 -28 -11.91 19.36
 -2 3 28 -0.2 26.51
 2 -3 -28 -7.27 23.7
 -2 -3 28 35.45 27.26
 -2 3 -28 11.28 47.85
 -2 -3 -29 -0.99 22.03
 2 3 -29 -2.93 39
 2 -3 29 12.56 30.77
 -2 3 29 26.78 20.03
 2 -3 -29 3.2 17.49
 -2 -3 29 63.36 31.67
 -2 3 -29 31.69 54.42
 2 3 -30 15.01 37.38
 2 -3 30 22.37 29.75
 -2 -3 -30 -5.47 31.78
 -2 3 30 7.7 18.93
 2 -3 -30 3.31 16.38
 -2 -3 30 6.53 46.68
 -2 3 -30 6.37 52.69
 -2 -3 30 -34.59 47.53
 -2 -3 -31 -2.5 20.14
 2 3 -31 15.24 37.16
 2 -3 31 -5.49 29.26
 -2 3 31 0.05 30.32
 -2 -3 31 20.37 30.38
 -2 3 -31 42.74 53
 2 -3 -31 -1.67 15.57
 -2 3 32 2.14 22.19
 -2 -3 -32 8.24 23.14
 2 3 -32 16.65 43.64
 2 -3 32 18.55 34.03
 -2 -3 32 23.32 35.7
 -2 3 -32 13.86 40.76
 -2 -3 -33 12.4 31.82
 2 3 -33 -3.8 60.75
 2 -3 33 -0.74 30.95
 -2 -3 33 -10.49 31.76
 -2 3 -33 -7.88 36.28
 2 3 -34 29.91 66.64
 2 -3 34 16.09 34.75
 -2 -3 -34 -1.15 22.71
 -2 3 -34 -10.13 41.21
 -2 -3 34 15.66 36.08
 -2 -3 -35 8.53 23.65
 2 -3 35 32.5 36.87
 -2 -3 35 -8.33 37.7
 -2 3 -35 -6.01 42.81
 3 -3 0 7.2 7.61
 3 3 0 -0.95 1.26
 3 -3 0 -3.53 13.37
 -3 -3 0 -7.45 5.11
 -3 3 0 10.6 13.48
 3 3 0 4.05 6.55
 3 3 -1 -1.73 8.46
 3 -3 1 6.37 9.12
 3 -3 1 -4.79 9.66
 -3 3 1 3.78 12.69
 -3 -3 -1 3.33 5.04
 -3 3 1 5.56 8.89
 3 -3 -1 9.66 7.88
 3 -3 -1 7.07 12.13
 3 3 1 7.9 6.39
 -3 -3 1 -4.21 6.12
 -3 3 -1 12.11 9.63
 3 -3 2 242.01 23.02
 -3 3 2 230.92 20.28
 -3 -3 -2 254.91 13.08
 3 3 -2 285.11 17.26
 -3 -3 2 272.96 24.06
 3 3 2 393.55 23.97
 3 -3 -2 236.61 20.21
 -3 3 -2 260.4 25.84
 3 -3 -2 257.74 22.39
 3 3 -3 41.59 9.39
 -3 3 3 42.99 10.69
 -3 -3 -3 42.38 5.85
 3 -3 3 53.81 20.12
 3 -3 -3 50.12 10.71
 3 3 3 50.05 5.29
 -3 -3 3 40.04 9.84
 3 -3 -3 34.34 18.19
 -3 3 -3 37.95 15.1
 -3 3 4 68.06 12.6
 -3 -3 -4 55.16 5.29
 3 -3 4 59.46 14.31
 3 3 -4 74.36 16.72
 3 -3 -4 47.76 11.14
 3 3 4 62.91 7.45
 -3 -3 4 61.24 11.43
 3 -3 -4 63.63 12.72
 -3 3 -4 64.01 16.34
 -3 -3 -5 304.31 14.22
 -3 3 5 333.68 34.57
 3 -3 5 308.07 28.13
 3 3 -5 362.85 22.78
 -3 3 -5 293.06 27.62
 3 3 5 326.64 10.87
 -3 -3 5 328.6 23.29
 3 -3 -5 307.8 23.63
 3 -3 -5 291.93 20.19
 -3 3 6 13.89 9.05
 3 -3 6 29.6 13.1
 -3 -3 -6 19.72 3.04
 -3 3 -6 10.87 12.04
 3 -3 -6 15.06 9.86
 -3 -3 6 19.6 9.9
 3 -3 -6 18.07 8.91
 3 3 6 14.76 2.93
 3 -3 7 9.88 12.02
 3 3 -7 2.41 2.23
 3 3 -7 7.9 17.44
 -3 -3 -7 5.13 3.29
 3 3 7 7.9 3.4
 -3 -3 7 -7.92 14.49
 -3 3 -7 16.86 12.76
 3 -3 -7 15.03 7.22
 3 3 -8 17.62 14
 -3 -3 -8 13.91 11.19
 3 -3 8 27.62 15.08
 -3 3 -8 15.33 16.18
 -3 -3 8 33.85 11.16
 3 -3 -8 21.38 8.42
 3 -3 9 11.95 21
 3 3 -9 9.7 20.62
 -3 -3 -9 11.73 10.8
 -3 -3 9 7.02 10.53
 3 3 9 11.68 3.96
 -3 3 -9 4.82 14.81
 3 -3 -9 9.52 8.08
 3 3 9 10.22 2.81
 3 3 -10 13.64 12.9
 -3 -3 -10 18.07 10.22
 3 -3 10 2.3 13.55
 3 -3 -10 13.71 12.49
 3 3 10 4.43 3.67
 -3 -3 10 18.57 10.6
 -3 3 -10 -4.93 13.68
 3 -3 11 70.74 20.28
 3 3 -11 57.12 28.74
 -3 -3 -11 72.74 22.51
 3 3 11 54.87 5.85
 3 -3 -11 66.53 12
 -3 -3 11 65.49 15.64
 3 3 11 59.37 3.4
 -3 3 -11 55.61 20.12
 3 -3 12 79.09 32.48
 -3 -3 -12 62.23 15.53
 3 3 -12 85.03 21.02
 3 3 12 66.17 7
 -3 -3 12 85.57 16.99
 3 3 12 68.58 7.63
 3 3 12 62.48 5.63
 3 -3 -12 82.6 17.56
 -3 3 -12 76.93 22.28
 -3 -3 -13 62.73 22.73
 3 3 -13 61.65 20.37
 3 -3 13 61.78 20.64
 3 3 13 52.04 5.2
 3 3 13 48.46 6.57
 -3 3 -13 38.8 20.77
 3 -3 -13 53.21 10.69
 -3 -3 13 56.27 17.42
 3 -3 14 -6.59 15.1
 -3 -3 -14 -1.71 11.01
 3 3 -14 14 22.75
 3 3 14 4.19 5.83
 -3 3 -14 34.28 23.99
 -3 -3 14 10.58 12.76
 3 3 14 4.16 3.53
 3 -3 -14 4.59 7.13
 -3 -3 -15 3.56 18.21
 3 -3 15 17.29 17.1
 3 3 -15 4.64 16.02
 3 3 15 7.99 7.34
 -3 -3 15 8.1 14.29
 3 3 15 14.09 6.98
 -3 3 -15 3.33 17.15
 3 -3 -15 10.35 8.1
 3 -3 16 5.29 16.52
 -3 -3 -16 1.98 11.16
 -3 3 16 5.2 9.27
 3 3 -16 4.64 15.55
 3 3 16 3.04 4.66
 -3 -3 16 13.08 13.77
 3 -3 -16 2.41 7.25
 -3 3 -16 17.94 16.5
 3 3 16 2.32 4.86
 -3 3 17 7.27 10.56
 -3 -3 -17 -1.82 19.31
 3 -3 17 -3.87 17.58
 3 3 -17 34.43 17.01
 3 3 17 11.23 8.53
 -3 -3 17 15.75 15.75
 3 -3 -17 1.33 8.1
 -3 3 -17 15.28 18.61
 3 3 17 4.39 5.69
 3 -3 18 11.82 23.92
 -3 -3 -18 7.47 11.03
 -3 3 18 -0.81 10.02
 3 3 -18 -6.75 25
 3 3 18 -4.03 7.74
 -3 -3 18 3.8 15.1
 3 -3 -18 -0.54 7.34
 -3 3 -18 10.89 16.95
 3 3 18 -9.23 9.03
 3 3 -19 4.52 15.51
 3 -3 19 24.98 25.93
 -3 -3 -19 5.74 12.27
 -3 3 19 13.01 10.29
 3 -3 -19 8.21 13.35
 -3 3 -19 14.29 18.23
 3 3 19 2.7 9.21
 3 3 19 -4.64 6.21
 -3 -3 19 -10.24 16.45
 -3 -3 -20 7.79 14.94
 3 3 -20 1.37 18.12
 -3 3 20 -3.17 11.79
 3 -3 20 -8.03 18.64
 3 -3 -20 5.94 9.9
 -3 3 -20 4.1 20.5
 3 3 20 16.11 16.5
 -3 -3 20 20.95 18.39
 3 3 20 14.9 11.37
 -3 3 21 10.8 13.1
 3 -3 21 23.02 20.14
 -3 -3 -21 20.26 15.37
 3 3 -21 6.39 18.88
 -3 -3 21 7.22 20.39
 3 3 21 5.56 8.8
 3 -3 -21 0.88 9.99
 -3 3 -21 6.62 22.3
 3 -3 22 2.14 17.56
 -3 -3 -22 14.38 21.29
 -3 3 22 -11.79 11.37
 3 3 -22 14.34 16.65
 3 -3 -22 9.97 8.71
 3 3 22 -2.95 8.06
 -3 3 -22 -16.05 19.4
 -3 -3 22 -13.01 18.07
 3 3 -23 15.91 24.26
 -3 3 23 27.89 15.62
 -3 -3 -23 17.04 17.83
 3 -3 23 17.8 25.16
 3 -3 -23 24.49 12.49
 -3 3 -23 24.53 28.07
 -3 -3 23 8.33 25.07
 3 3 23 26.9 18.12
 3 3 -24 20.66 21.81
 -3 -3 -24 17.4 15.93
 3 -3 24 15.44 22.15
 -3 3 24 0.86 13.89
 3 -3 -24 -4.32 10.87
 -3 -3 24 16.72 22.87
 3 3 24 -2.03 15.62
 -3 3 -24 1.82 24.69
 3 3 -25 -9.72 23.65
 -3 -3 -25 22.15 25.52
 3 -3 25 32.57 22.89
 -3 3 25 -3.17 14.97
 3 -3 -25 4.84 12.4
 3 3 25 1.13 10.87
 -3 3 -25 21.11 26.54
 -3 -3 25 16.05 23.7
 3 3 -26 13.82 23.79
 -3 3 26 2.09 14.63
 -3 -3 -26 5.6 16.43
 3 -3 26 -3.04 23.29
 3 -3 -26 8.19 12.49
 -3 -3 26 20.46 36.51
 -3 3 -26 -41.75 26.4
 3 3 -27 5.81 27.62
 -3 -3 -27 4.91 17.98
 3 -3 27 19.54 26.33
 -3 3 27 -3.42 25.91
 -3 -3 27 22.1 27.93
 3 -3 -27 -11.21 21.49
 -3 3 -27 29.93 29.48
 3 3 -28 33.35 26.58
 3 -3 28 10.24 24.91
 -3 -3 -28 -12.24 18.84
 -3 3 28 1.13 17.22
 3 -3 -28 -5.78 13.21
 -3 -3 28 16.36 26.51
 -3 3 -28 8.28 29.17
 3 3 -29 12.18 31.82
 3 -3 29 23.41 29.62
 -3 3 29 16.56 20.17
 -3 -3 -29 1.1 21.67
 3 -3 -29 6.35 15.73
 -3 -3 29 11.97 31.89
 -3 3 -29 7.72 33.6
 3 3 -30 14.67 33.26
 3 -3 30 -5.6 31.06
 -3 -3 -30 14.92 22.35
 -3 3 30 -2.99 32.45
 -3 -3 30 -9.18 32.57
 -3 3 -30 15.06 35
 3 -3 -30 12.47 15.8
 -3 -3 -31 11.52 24.06
 3 3 -31 11.41 38.1
 3 -3 31 55.64 34.55
 -3 3 31 8.42 23.97
 -3 3 -31 -34.19 40.49
 -3 -3 31 48.73 36.73
 -3 -3 -32 -7.25 23.97
 3 -3 32 37 51.88
 -3 3 32 5.09 22.44
 3 3 -32 19.29 37.32
 -3 -3 32 15.87 36.06
 -3 3 -32 37.97 39.36
 -3 -3 -33 16.27 26.04
 3 3 -33 24.19 41.1
 3 -3 33 3.62 58
 -3 3 33 20.14 39.25
 -3 3 -33 12.45 68.1
 -3 -3 33 10.04 40.69
 -3 -3 -34 39.48 43.24
 3 3 -34 7.47 42.94
 3 -3 34 44.47 67.99
 -3 3 -34 47.74 75.04
 -3 -3 34 -5.27 66.71
 -3 -3 34 1.62 65.36
 -3 -3 -35 -3.71 21.11
 3 3 -35 -14.58 32.16
 3 -3 35 19.45 32.68
 -3 3 -35 17.74 37.14
 -3 -3 35 -8.78 32.63
 4 -3 0 -5.67 7.99
 4 -3 0 -5.87 12.47
 -4 -3 0 1.96 4.77
 -4 3 0 -4.7 8.67
 4 3 0 -0.34 4.52
 -4 3 1 15.19 16.09
 4 -3 1 6.86 10.13
 4 -3 1 23.45 15.12
 -4 -3 -1 13.12 5.51
 4 3 -1 6.5 6.12
 4 -3 -1 15.06 9.79
 4 -3 -1 19.51 10.33
 4 3 1 12.92 7.38
 -4 -3 1 13.12 10.17
 -4 3 -1 20.55 11.41
 -4 -3 1 16.86 10.15
 -4 3 2 13.55 14.74
 4 -3 2 12.85 11.59
 4 3 -2 10.47 6.46
 -4 -3 -2 8.62 6.89
 4 -3 -2 13.03 9.23
 -4 -3 2 12.6 7.2
 4 3 2 8.35 6.39
 -4 3 -2 17.85 11.39
 4 -3 3 38.26 21.16
 -4 -3 -3 39.59 5.27
 4 3 -3 36.35 9.14
 4 -3 -3 42.63 10.22
 4 3 3 48.28 7.11
 -4 -3 3 36.8 13.89
 -4 3 -3 58.76 15.26
 4 -3 -3 42.69 11.52
 4 -3 4 41.46 13.44
 -4 -3 -4 30.05 4.32
 4 3 -4 24.06 9.16
 -4 3 -4 17.42 13.08
 4 3 4 27.98 5.38
 -4 -3 4 23.07 9.32
 4 -3 -4 29.78 10.85
 4 -3 -4 33.71 10.24
 -4 -3 -5 61.22 6.8
 4 -3 5 92.75 17.38
 4 3 -5 66.57 12.06
 -4 3 -5 56.81 25.07
 -4 -3 5 77.49 12.45
 4 3 5 70.58 4.12
 4 -3 -5 81.16 13.37
 4 -3 -5 105.71 18.48
 4 -3 6 42.99 14.29
 -4 -3 -6 36.17 3.74
 -4 3 -6 53.3 16.52
 -4 -3 6 45.35 10.83
 4 3 6 31.91 3.04
 4 -3 -6 49.76 11.01
 4 -3 -6 36.64 10.98
 4 -3 7 55.34 16.95
 -4 3 -7 48.66 18.97
 4 -3 -7 52.42 11.86
 -4 -3 7 62.07 19.76
 4 -3 -7 45.78 11.34
 4 -3 8 35.52 16.7
 -4 -3 -8 41.39 13.5
 4 -3 -8 33.33 11.05
 -4 3 -8 27.12 24.31
 -4 -3 8 26.22 12.76
 4 -3 -8 45.64 10.58
 4 3 -9 7.65 18.86
 4 -3 9 -1.87 14.18
 -4 -3 -9 15.69 10.29
 -4 3 -9 8.73 13.05
 4 -3 -9 3.13 8.62
 -4 -3 9 4.55 10.53
 4 -3 10 -6.19 13.26
 4 3 -10 9.3 12.24
 -4 -3 -10 12.96 10.29
 -4 3 -10 -3.51 13.5
 -4 -3 10 2.72 10.74
 4 -3 -10 1.64 13.12
 4 3 -11 99.73 30.59
 4 -3 11 67.74 22.87
 -4 -3 -11 66.75 16.74
 -4 3 -11 74.25 21.43
 -4 -3 11 85.75 18.03
 4 -3 -11 89.6 14.18
 4 -3 12 43.12 27.39
 -4 -3 -12 27.19 13.3
 4 3 -12 19.99 16.92
 -4 -3 12 30.23 14.7
 -4 3 -12 18.41 27.26
 4 -3 -12 22.39 8.82
 4 -3 13 21.2 18.14
 -4 -3 -13 8.78 14.18
 4 3 -13 42.78 17.01
 -4 -3 13 27.57 15.73
 -4 3 -13 14.27 18.5
 4 -3 -13 28.2 8.39
 4 -3 14 17.58 14.61
 -4 -3 -14 12.24 10.94
 4 3 -14 10.94 21.79
 4 3 14 0.25 2.57
 4 3 14 2.21 1.87
 4 3 14 -0.59 2.61
 -4 -3 14 -11.03 12.54
 -4 3 -14 7.07 15.01
 4 -3 -14 -0.77 6.21
 4 -3 15 15.06 15.37
 -4 -3 -15 -5.04 11.14
 4 3 -15 -0.74 14.67
 -4 -3 15 -24.31 13.86
 4 3 15 2.66 3.98
 4 3 15 1.8 2.7
 -4 3 -15 -6.37 15.82
 4 -3 -15 4.57 6.39
 -4 3 16 4.73 14.61
 4 -3 16 16.38 15.89
 -4 -3 -16 3.85 11.23
 4 3 -16 14.63 14.58
 4 3 16 -2.95 3.22
 -4 -3 16 11.34 13.37
 -4 3 -16 4.52 16.05
 4 -3 -16 -0.97 6.21
 4 3 16 -0.86 3.33
 -4 3 17 12.36 10.13
 -4 -3 -17 10.58 11.68
 4 -3 17 -1.82 26.06
 4 3 -17 10.06 15.84
 4 3 17 -2.81 4.16
 4 -3 -17 2.99 10.29
 -4 3 -17 0.59 16.9
 4 3 17 2.09 3.94
 -4 -3 17 0.88 15.26
 4 -3 18 -1.06 16.97
 -4 -3 -18 8.37 12.4
 -4 3 18 -0.02 11.05
 4 3 -18 16.27 24.58
 4 3 18 -3.4 5.06
 4 -3 -18 5.9 6.77
 -4 -3 18 -2.61 15.8
 -4 3 -18 18.41 17.78
 4 3 18 0.54 4.61
 -4 -3 -19 31.87 22.15
 -4 3 19 9.52 13.26
 4 -3 19 6.37 20.66
 4 3 -19 13.82 18.86
 4 -3 -19 5.04 8.94
 4 3 19 7.22 6.64
 -4 -3 19 2.81 20.01
 -4 3 -19 23.36 20.71
 4 3 19 5.69 8.46
 -4 3 20 4.32 11.75
 -4 -3 -20 5.58 14.47
 4 -3 20 22.17 19.02
 4 3 -20 14.54 17.42
 4 3 20 -3.13 6.82
 4 -3 -20 -5.15 13.23
 -4 -3 20 15.66 27.86
 -4 3 -20 -1.31 20.26
 4 -3 21 8.42 21.94
 -4 -3 -21 -2.32 16.41
 -4 3 21 13.64 13.62
 4 3 -21 26.13 20.86
 4 -3 -21 6.53 9.21
 4 3 21 5.45 8.42
 -4 3 -21 3.11 23.23
 -4 -3 21 5.6 31.46
 4 -3 22 27.46 22.24
 -4 -3 -22 -5.87 25.52
 -4 3 22 4.37 14.22
 4 3 -22 1.96 20.57
 4 -3 -22 -17.85 14.07
 -4 -3 22 17.42 20.55
 -4 3 -22 11.95 22.84
 4 3 22 7.45 8.87
 -4 -3 -23 -8.1 15.71
 4 -3 23 -8.1 22.71
 -4 3 23 18.1 14.43
 4 3 -23 -9.93 21.79
 4 3 23 -7.92 14.34
 4 -3 -23 12.6 9.43
 -4 -3 23 -20.98 21.25
 -4 3 -23 19.92 24.22
 -4 3 24 -5.4 14.16
 -4 -3 -24 10.17 16.25
 4 -3 24 -16.5 23.18
 4 3 -24 9.18 33.89
 4 -3 -24 -11.25 16.27
 -4 -3 24 2.23 22.15
 -4 3 -24 7.25 24.49
 4 -3 25 -28.16 22.98
 -4 -3 -25 11.59 23.59
 4 3 -25 24.8 30.59
 -4 3 25 4.25 14.09
 4 -3 -25 3.69 10.42
 -4 3 -25 -30.5 24.78
 -4 -3 25 4.88 21.92
 -4 -3 -26 29.87 18.86
 4 3 -26 11.28 40.24
 -4 3 26 -1.08 27.26
 4 -3 26 -8.06 28.92
 4 -3 -26 -3.51 19.72
 -4 -3 26 6.53 27.32
 -4 3 -26 32.21 30.43
 4 3 -27 5.15 38.76
 -4 -3 -27 4.5 18.41
 -4 3 27 10.42 16.88
 4 -3 27 4.5 27.68
 4 -3 -27 0.72 12.4
 -4 3 -27 8.44 29.84
 -4 -3 27 -2.25 26.24
 4 3 -28 24.94 48.1
 -4 -3 -28 0.68 37.16
 -4 3 28 2.5 20.28
 4 -3 28 15.33 33.13
 4 -3 -28 22.62 22.3
 -4 -3 28 23.29 31.62
 -4 3 -28 39.68 35.65
 -4 -3 -29 20.01 24.53
 4 3 -29 4.03 33.29
 -4 3 29 13.01 22.89
 4 -3 29 6.23 34.71
 -4 3 -29 38.51 37.72
 -4 -3 29 20.84 32.86
 4 3 -30 4.48 36.62
 -4 -3 -30 -1.13 26.06
 -4 3 30 26.9 24.71
 4 -3 30 33.44 36.91
 -4 -3 30 58.4 54.2
 -4 3 -30 33.13 40.71
 -4 -3 -31 48.88 39.36
 4 3 -31 -17.98 57.1
 4 -3 31 18.97 37.77
 -4 3 31 3.62 37.25
 -4 -3 31 -4.75 37.54
 -4 3 -31 21.61 40.74
 -4 -3 -32 -8.01 24.06
 4 3 -32 -5.49 51.92
 4 -3 32 -18.57 35.04
 -4 3 32 -6.3 22.37
 -4 -3 32 -0.41 34.07
 -4 3 -32 24.73 38.28
 -4 -3 -33 -2.12 26.67
 4 3 -33 45.13 59.75
 4 -3 33 25.07 39.07
 -4 3 33 6.84 24.85
 -4 3 -33 32 43.42
 -4 -3 33 15.39 39.81
 -4 -3 -34 -4.97 39.5
 -4 3 34 -0.81 37.16
 4 -3 34 13.37 38.31
 -4 -3 34 18.23 38.78
 -4 3 -34 11.59 42.6
 -4 -3 -35 -4.1 27.05
 4 -3 35 15.75 40.62
 -4 3 -35 25.7 43.89
 -4 -3 35 22.1 40.08
 5 3 0 3.22 4.1
 5 -3 0 -0.32 8.94
 5 -3 0 5.78 7.7
 5 3 0 -0.45 1.35
 -5 -3 0 1.62 6.98
 -5 3 0 5.13 9.16
 5 -3 1 34.95 16.5
 -5 -3 -1 12.38 5.63
 -5 3 1 21.7 10.71
 5 3 -1 6.62 5.92
 5 -3 -1 17.94 10.8
 5 3 1 12.45 4.79
 5 -3 -1 24.49 13.95
 -5 -3 1 5.45 6.41
 -5 3 -1 18.86 11.39
 -5 -3 -2 15.91 5.15
 5 -3 2 37.61 12.04
 -5 3 2 31.17 10.85
 5 3 -2 16.25 6.95
 5 -3 -2 19.51 9.9
 5 3 2 18.64 6.91
 -5 -3 2 30.2 11.75
 -5 3 -2 17.13 19.9
 5 -3 -2 28.83 11.43
 5 3 -3 54.06 10.24
 5 -3 3 99.64 19.24
 -5 -3 -3 56.87 9.21
 -5 3 -3 77.06 16.09
 5 -3 -3 108.82 14.43
 -5 -3 3 64.01 11.41
 5 3 3 57.19 5.65
 5 -3 -3 107.24 14.83
 -5 -3 -4 116.63 10.22
 5 -3 4 194.95 23.83
 5 3 -4 78.05 14.04
 5 -3 -4 154.48 24.6
 5 -3 -4 180.93 17.51
 -5 -3 4 94.48 15.57
 5 3 4 133.44 6.19
 -5 -3 -5 6.28 3.51
 5 -3 5 4.12 11.79
 5 -3 -5 5.33 7.38
 5 -3 -5 13.41 9.39
 -5 3 -5 6.21 13.17
 5 3 5 4.86 2.43
 -5 -3 5 -5.4 8.26
 5 -3 6 7.94 10.89
 5 3 -6 -0.05 1.37
 -5 -3 -6 1.69 1.24
 -5 3 6 0.25 0.92
 -5 3 -6 4.91 11.79
 5 3 6 -0.68 1.73
 -5 -3 6 4.1 7.99
 5 3 6 0.02 1.01
 5 -3 -6 2.23 12.24
 5 -3 -6 6.84 7.31
 5 -3 7 78.1 19.04
 -5 -3 -7 63.83 16.63
 -5 3 -7 63.4 18.39
 -5 -3 7 57.46 22.53
 5 -3 -7 78.59 19.78
 5 -3 -7 77.72 14.2
 5 -3 8 12.09 16.68
 -5 -3 -8 35.49 12.94
 -5 -3 8 44.07 27.05
 -5 3 -8 22.75 16.27
 5 -3 -8 35.88 10.58
 5 -3 -8 30.45 11.07
 5 -3 9 41.21 17.24
 -5 -3 -9 21.47 14.2
 -5 -3 9 19.2 28.61
 -5 3 -9 34.07 17.22
 5 -3 -9 37.81 10.53
 5 -3 -9 30 11.7
 5 -3 10 12.51 17.38
 -5 -3 -10 22.42 13.14
 5 -3 -10 23.9 15.28
 -5 3 -10 42.6 25.63
 -5 -3 10 23.02 19.42
 5 -3 -10 33.44 17.69
 5 -3 11 -0.79 15.96
 -5 -3 -11 13.75 12.56
 5 -3 -11 16.56 10.65
 5 -3 -11 9.43 9.32
 -5 -3 11 26.56 17.8
 -5 3 -11 4.68 15.55
 5 -3 12 -5.13 16.9
 5 3 -12 17.6 14.2
 -5 -3 -12 1.15 12.74
 -5 -3 12 12.72 18.95
 -5 3 -12 7.85 16
 5 -3 -12 14.31 6.95
 5 -3 13 -5.94 16.2
 5 3 -13 7.76 14.25
 -5 -3 -13 0.74 12.4
 -5 -3 13 33.74 30
 -5 3 -13 2.27 15.93
 5 -3 -13 9.09 6.35
 5 -3 14 13.26 17.71
 -5 -3 -14 16.56 19.13
 5 3 -14 -0.07 24.17
 -5 -3 14 15.87 31.33
 -5 3 -14 -0.02 17.35
 5 -3 -14 6.98 6.41
 5 -3 15 5.02 16.81
 -5 -3 -15 -5.22 12.49
 5 3 -15 10.44 15.15
 -5 -3 15 19.13 23.36
 -5 3 -15 9.79 17.51
 5 -3 -15 2.9 6.26
 5 -3 16 12.27 30.95
 -5 -3 -16 7.22 14.99
 5 3 -16 20.57 18.48
 -5 -3 16 -20.93 27.44
 -5 3 -16 23.16 31.08
 5 -3 -16 18.01 7.04
 -5 3 17 20.19 12.13
 5 -3 17 19.76 18.66
 -5 -3 -17 0.38 13.73
 5 3 -17 -2.93 25.91
 5 3 17 2.63 3.42
 5 -3 -17 6.73 6.64
 -5 -3 17 15.42 17.33
 -5 3 -17 30.97 27.37
 -5 3 18 1.19 11.91
 5 -3 18 3.87 18.41
 -5 -3 -18 12.2 13.41
 5 3 -18 9.12 17.26
 5 -3 -18 -10.67 11.14
 -5 -3 18 17.87 16.65
 5 3 18 1.08 3.49
 -5 3 -18 13.57 17.78
 5 3 18 3.6 4.43
 -5 3 19 25.12 14.76
 5 -3 19 19.22 22.06
 5 3 -19 8.85 20.37
 5 -3 -19 12.99 8.69
 -5 -3 19 8.37 21.29
 5 3 19 6.48 7.07
 -5 3 -19 14.94 21.25
 -5 -3 -20 -6.86 17.96
 5 -3 20 17.4 23.11
 -5 3 20 9.54 15.73
 5 3 -20 1.4 21.4
 5 3 20 12.49 7.63
 -5 -3 20 26.11 22.75
 5 -3 -20 16.88 8.53
 -5 3 -20 28.34 22.37
 5 -3 21 6.71 21.22
 -5 -3 -21 11.25 16.52
 -5 3 21 0.65 13.91
 5 3 -21 8.73 19.2
 5 -3 -21 17.24 12
 5 3 21 -1.67 5.33
 -5 -3 21 1.55 21.13
 -5 3 -21 8.71 21.2
 5 -3 22 13.86 27.12
 -5 -3 -22 49.56 30.38
 -5 3 22 22.96 18.43
 5 3 -22 10.58 39.34
 -5 -3 22 33.17 27.28
 5 -3 -22 20.39 10.53
 -5 3 -22 34.07 27.08
 -5 3 23 2.77 14.29
 5 3 -23 10.98 30.16
 5 -3 23 -13.01 21.34
 -5 -3 -23 3.62 15.37
 5 -3 -23 11.95 13.59
 -5 -3 23 -3.17 21.97
 -5 3 -23 -27.17 21.58
 5 -3 24 19.78 24.78
 -5 -3 -24 8.62 18.16
 -5 3 24 4.91 17.08
 5 3 -24 9.79 22.44
 5 -3 -24 0.77 10.17
 -5 -3 24 3.76 25.43
 -5 3 -24 14.65 25.34
 -5 -3 -25 7.38 30.36
 5 -3 25 25 42.45
 -5 3 25 23.5 28.36
 5 3 -25 -3.02 25.75
 5 -3 -25 12.27 11.19
 -5 -3 25 28.18 43.37
 -5 3 -25 -11.16 28.2
 -5 -3 -26 -14.2 19
 5 -3 26 14.54 41.3
 -5 3 26 17.24 17.29
 5 3 -26 8.03 25.41
 5 -3 -26 0.54 10.87
 -5 -3 26 56.99 40.51
 -5 3 -26 -1.73 42.36
 5 3 -27 -0.27 28.67
 -5 -3 -27 5.38 20.75
 5 -3 27 9.93 46.32
 -5 3 27 31.17 30.65
 -5 3 -27 5.36 45.6
 -5 -3 27 5.38 29.3
 5 3 -28 -13.71 30.9
 -5 -3 -28 -9.81 35.79
 5 -3 28 -2.05 47.33
 -5 3 28 5.69 20.12
 -5 -3 28 -37.45 30.5
 -5 3 -28 3.49 53.09
 5 3 -29 -4.79 29.96
 5 -3 29 17.71 45.78
 -5 -3 -29 3.13 21.72
 -5 3 29 5.81 18.91
 -5 -3 29 -12.83 28.72
 -5 3 -29 21 50.75
 5 3 -30 16.61 33.02
 5 -3 30 10.85 48.82
 -5 3 30 18.32 33.89
 -5 -3 -30 -15.78 23.05
 -5 3 -30 17.4 35.16
 -5 -3 30 -3.67 30.34
 5 3 -31 -2.16 38.35
 5 -3 31 29.17 35.83
 -5 -3 -31 19.54 41.23
 -5 3 31 0.99 24.87
 -5 3 -31 14.85 39.66
 -5 -3 31 11.7 34.75
 5 3 -32 -10.8 40.15
 -5 -3 -32 18.97 26.92
 5 -3 32 27.48 38.44
 -5 3 32 -2.86 25.48
 -5 -3 32 16.99 36.73
 -5 3 -32 30.92 42.15
 -5 -3 -33 3.74 25.03
 -5 3 33 -14.81 36.93
 5 -3 33 9.93 36.21
 -5 3 -33 14.74 38.1
 -5 -3 33 5.9 54.44
 -5 -3 -34 6.08 27.26
 5 -3 34 17.74 38.26
 -5 3 34 13.73 25.39
 -5 3 -34 17.47 41.1
 -5 -3 34 -22.98 39.07
 6 -3 0 79.52 15.28
 6 3 0 40.78 7.52
 6 -3 0 51.95 18.79
 -6 -3 0 52.4 8.82
 -6 3 0 72.11 14.81
 6 -3 1 8.37 11.66
 -6 -3 -1 15.53 8.33
 6 3 -1 10.96 6.01
 -6 3 1 15.71 10.62
 6 -3 -1 22.1 17.4
 6 -3 -1 5.18 8.17
 -6 -3 1 14.97 10.22
 6 3 1 1.53 4.79
 -6 3 -1 15.69 11.28
 6 -3 2 20.12 12.18
 -6 3 2 16.86 10.08
 6 3 -2 7.02 10.22
 -6 -3 -2 6.93 4.77
 -6 3 -2 6.41 10.8
 -6 -3 2 18.86 10.53
 6 3 2 3.33 6.55
 6 -3 -2 20.01 9.12
 6 -3 -2 36.55 11.14
 6 -3 3 23.61 11.88
 -6 -3 -3 6.5 4.28
 6 3 -3 11.88 7.43
 -6 3 3 7.72 9.41
 -6 -3 3 17.19 11.05
 6 3 3 7.38 5.2
 6 -3 -3 15.15 8.51
 6 -3 -3 5.06 10.67
 6 -3 4 38.96 20.14
 -6 -3 -4 14.97 5.54
 6 3 -4 10.24 8.28
 6 -3 -4 10.26 8.91
 -6 -3 4 28.88 12.29
 -6 3 -4 6.28 13.98
 6 -3 -4 10.96 17.92
 6 -3 5 15.82 14.56
 -6 -3 -5 8.08 3.87
 -6 -3 5 3.31 13.03
 6 -3 -5 16.68 12.6
 6 -3 -5 14.92 10.89
 -6 3 -5 10.78 21.47
 6 -3 6 235.91 45.87
 -6 -3 -6 202.99 25.41
 6 -3 -6 210.05 20.82
 -6 3 -6 182.26 27.98
 -6 -3 6 207.96 31.24
 6 -3 -6 235.64 23.54
 6 -3 7 41.82 16.05
 -6 -3 -7 19.67 13.35
 -6 -3 7 7.63 17.13
 6 -3 -7 30.68 9.07
 -6 3 -7 7.25 15.53
 6 -3 -7 19.9 17.96
 6 -3 8 99.19 21.49
 -6 -3 -8 77.35 18.43
 6 -3 -8 81.18 17.62
 -6 3 -8 68.19 33.2
 -6 -3 8 72.54 24.64
 6 -3 -8 96.91 16.2
 6 -3 9 0.36 14.43
 -6 -3 -9 11.07 11.55
 -6 3 -9 -2.59 13.66
 -6 -3 9 5.92 16.61
 6 -3 -9 13.03 10.65
 6 -3 -9 8.35 7.97
 6 -3 10 12.51 17.06
 -6 -3 -10 43.51 13.82
 -6 -3 10 43.87 20.23
 -6 3 -10 12.04 16.81
 6 -3 -10 19.54 9.95
 6 -3 -10 21.36 19.38
 6 -3 11 33.38 25.57
 -6 -3 -11 -3.65 21.74
 -6 3 -11 16.68 17.62
 -6 -3 11 18.39 20.48
 6 -3 -11 18.59 14.45
 6 -3 -11 24.82 12.76
 -6 -3 -12 12 13.14
 6 -3 12 9.23 16.25
 -6 -3 12 16.68 19.2
 -6 3 -12 -5.4 16.23
 6 -3 -12 11.61 8.55
 6 -3 -12 3.13 6.14
 6 -3 13 -1.76 16.11
 -6 -3 -13 -2.84 13.32
 6 -3 -13 6.28 8.21
 -6 3 -13 20.03 25.7
 -6 -3 13 11.52 19.38
 6 -3 -13 5.22 8.98
 6 -3 14 -3.4 17.35
 -6 -3 -14 3.06 13.14
 6 -3 -14 4.43 13.95
 -6 -3 14 12.54 21.02
 6 -3 -14 6.68 8.85
 -6 3 -14 31.6 24.62
 6 -3 15 7.45 26.49
 6 3 -15 20.59 14.43
 -6 -3 -15 0.86 12.99
 -6 -3 15 2.41 20.98
 6 -3 -15 -1.87 8.67
 -6 3 -15 -3.53 16.09
 6 -3 16 19.96 19.58
 6 3 -16 3.17 16.77
 -6 -3 -16 4.61 23.34
 -6 -3 16 1.31 25.18
 6 -3 -16 13.84 9.61
 -6 3 -16 5.22 18.73
 6 3 -17 34.75 30
 -6 -3 -17 9.7 16.56
 6 -3 17 22.6 22.55
 -6 3 17 9.93 23.88
 -6 -3 17 19.15 28.31
 6 -3 -17 19.74 10.51
 -6 3 -17 4.61 20.05
 -6 3 18 10.67 14
 6 -3 18 11.88 21
 -6 -3 -18 12.42 15.37
 6 3 -18 13.19 18.86
 6 -3 -18 1.1 6.91
 -6 3 -18 20.5 19.85
 -6 -3 18 8.51 26.99
 6 -3 19 6.71 21.22
 6 3 -19 -5.38 18.97
 -6 3 19 10.33 23.77
 -6 -3 -19 -10.13 17.15
 -6 -3 19 8.28 28.07
 6 -3 -19 7.63 6.66
 -6 3 -19 15.57 20.95
 6 3 -20 35.2 22.35
 6 -3 20 22.33 25.03
 -6 -3 -20 -7.18 20.19
 -6 3 20 22.57 18.25
 6 -3 -20 8.44 12.38
 -6 -3 20 71.62 50.77
 -6 3 -20 32.41 24.89
 6 3 -21 3.42 19.94
 6 -3 21 5.56 34.84
 -6 -3 -21 -6.1 17.83
 -6 3 21 3.58 24.71
 6 -3 -21 4.66 7.27
 -6 -3 21 -5.83 33.89
 -6 3 -21 7.38 22.17
 -6 -3 -22 56.22 25.07
 6 -3 22 94.17 50.35
 -6 3 22 49.81 23.14
 6 3 -22 115.84 47.02
 6 -3 -22 40.87 12.6
 -6 -3 22 53.16 32
 -6 3 -22 58.13 33.78
 -6 3 23 8.15 18.12
 6 -3 23 6.39 41.01
 -6 -3 -23 13.48 20.12
 6 3 -23 15.03 23.81
 6 -3 -23 11.75 14.54
 -6 -3 23 29.98 26.15
 -6 3 -23 -16.41 27.68
 6 -3 24 14.61 28.18
 -6 -3 -24 15.3 20.62
 -6 3 24 16.61 19.85
 6 3 -24 1.19 24.69
 6 -3 -24 11.14 9.88
 -6 3 -24 -10.85 28.99
 -6 -3 24 22.71 28.4
 -6 -3 -25 24.8 22.44
 6 -3 25 27.84 31.46
 -6 3 25 21.22 22.17
 6 3 -25 9.77 27.66
 -6 -3 25 8.76 32
 -6 3 -25 24.96 31.55
 -6 -3 -26 -10.08 19.54
 6 -3 26 -9.05 26.69
 -6 3 26 12.11 18.14
 6 3 -26 21.22 24.35
 -6 -3 26 3.2 27.41
 -6 3 -26 1.55 28.61
 -6 -3 -27 1.51 21.29
 6 -3 27 -0.63 29.69
 -6 3 27 7.92 19.67
 6 3 -27 4.01 26.49
 -6 -3 27 8.39 30
 -6 3 -27 15.3 29.93
 -6 -3 -28 31.06 42.6
 6 -3 28 1.8 36.51
 -6 3 28 24.82 38.46
 6 3 -28 12.78 32.95
 -6 -3 28 36.89 36.84
 -6 3 -28 24.69 36.57
 -6 -3 -29 22.15 25.72
 6 -3 29 18.61 34.19
 -6 3 29 -1.98 23.09
 6 3 -29 10.96 31.22
 -6 -3 29 14.76 49.54
 -6 3 -29 -2.39 34.8
 -6 -3 -30 -2.25 24.44
 6 -3 30 15.51 32.5
 -6 3 30 1.49 22.17
 6 3 -30 10.69 32
 -6 -3 30 2.63 32.68
 -6 3 -30 12.56 52.91
 -6 -3 -31 32.39 43.69
 6 -3 31 17.04 37.9
 -6 3 31 -13.08 38.91
 -6 3 -31 5.94 64.95
 -6 -3 31 15.06 37.11
 -6 -3 -32 12.2 23.09
 -6 3 32 -1.64 21.88
 6 -3 32 -41.25 32.41
 -6 -3 32 9.36 30.61
 -6 3 -32 13.03 35.58
 -6 -3 -33 17.33 29.69
 6 -3 33 37.16 40.53
 -6 3 33 14.25 27.89
 -6 3 -33 1.37 46.63
 -6 -3 33 -4.03 40.02
 -6 -3 -34 -2.32 27.41
 6 -3 34 -6.95 39.05
 -6 3 34 9.14 42.92
 -6 3 -34 6.71 43.05
 -6 -3 34 36.17 37.56
 7 3 0 5.74 4.86
 7 3 0 1.24 1.64
 -7 -3 0 0.05 12.11
 -7 3 0 -3.22 9.75
 7 -3 0 15.87 17.01
 7 -3 1 -2.93 11.84
 -7 -3 -1 0.16 7.61
 7 3 -1 1.35 8.98
 -7 3 1 6.73 15.55
 -7 3 -1 7.13 9.77
 -7 -3 1 19.92 9.99
 7 -3 -1 4.05 7.92
 7 -3 -1 0.14 11.37
 7 -3 2 62.07 15.03
 -7 -3 -2 32.86 13.48
 7 3 -2 20.73 8.78
 -7 3 2 32.03 12.67
 -7 -3 2 19.85 9.34
 7 -3 -2 30 10.44
 7 -3 -2 43.96 13.8
 7 -3 3 14.76 13.3
 -7 -3 -3 5.81 4.61
 -7 3 3 -0.2 9.59
 7 3 -3 2.95 7.81
 -7 -3 3 3.65 8.26
 7 -3 -3 8.55 8.01
 -7 3 -3 21.63 12.38
 7 -3 -3 25.16 11.05
 7 -3 4 89.53 19.63
 -7 3 4 79.56 13.84
 -7 -3 -4 72.58 16.63
 -7 -3 4 63.38 13.53
 7 -3 -4 80.96 12.45
 -7 3 -4 69.14 31.04
 7 -3 -4 98.89 18.07
 7 -3 5 7.72 11.93
 -7 -3 -5 3.89 3.62
 -7 -3 -5 -10.4 10.24
 -7 -3 -5 4.21 3.02
 -7 3 5 0.99 1.28
 7 3 -5 -0.99 1.44
 7 -3 -5 0.29 7.11
 -7 3 -5 0.72 11.05
 -7 -3 5 18.32 8.24
 7 -3 -5 -19.42 14.94
 7 -3 6 45.17 20.17
 -7 -3 -6 31.85 15.01
 -7 -3 6 38.6 13.1
 -7 3 -6 42.31 17.31
 7 -3 -6 63.45 14.72
 7 -3 -6 36.91 10.24
 7 -3 7 38.58 19.76
 -7 -3 -7 16.77 14.81
 7 -3 -7 27.89 9.77
 -7 -3 7 39.39 13.71
 -7 3 -7 22.39 25.75
 7 -3 -7 44.27 13.91
 7 -3 8 149.06 37.59
 -7 -3 -8 52.19 18.01
 -7 -3 8 80.98 18.73
 -7 3 -8 80.1 22.66
 7 -3 -8 83.12 17.87
 7 -3 -8 122.55 17.96
 7 -3 9 24.08 15.75
 -7 -3 -9 6.73 12.76
 7 -3 -9 12.67 8.3
 -7 3 -9 26.15 14.85
 -7 -3 9 5.81 12.81
 7 -3 -9 -1.73 12.65
 7 -3 10 26.94 15.51
 -7 -3 -10 -6.3 18.75
 -7 -3 10 -1.94 12.47
 7 -3 -10 5.74 6.55
 -7 3 -10 7.81 15.19
 7 -3 -10 5.81 17.69
 7 -3 11 20.21 25.25
 -7 -3 -11 15.44 13.8
 7 -3 -11 7.7 10.74
 -7 3 -11 12.63 25.36
 -7 -3 11 19.56 13.71
 7 -3 -11 -4.3 12.56
 7 -3 12 9.66 15.19
 -7 -3 -12 -2.5 12.99
 -7 -3 12 11.21 13.3
 -7 3 -12 12.69 14.49
 7 -3 -12 3.24 7.7
 7 -3 -12 -4.12 7.16
 7 -3 13 17.31 16.65
 -7 -3 -13 5.96 13.41
 -7 -3 13 6.23 14.9
 7 -3 -13 7.16 7.61
 -7 3 -13 4.84 15.93
 7 -3 -13 0.02 7.9
 7 -3 14 19 28.07
 -7 -3 -14 10.89 14.31
 -7 -3 14 14.27 15.89
 7 -3 -14 6.84 5.18
 -7 3 -14 22.6 17.83
 7 -3 -14 7.09 13.28
 7 -3 15 18.5 19.31
 -7 -3 -15 16 24.24
 7 -3 -15 7.9 5.22
 -7 -3 15 25.05 27.55
 7 -3 -15 14.79 8.98
 -7 3 -15 9.32 18.77
 7 -3 16 14.47 19.33
 -7 -3 -16 1.76 14.92
 7 -3 -16 10.06 13.39
 7 -3 -16 2.21 5.09
 -7 -3 16 2.72 38.35
 -7 3 -16 27.68 18.16
 7 -3 17 2.57 20.44
 -7 -3 -17 -15.15 15.91
 7 -3 -17 10.42 9.16
 7 -3 -17 7.36 5.76
 -7 -3 17 1.46 26.2
 -7 3 -17 11.03 19.96
 -7 3 18 62.03 20.28
 7 -3 18 19.29 26.6
 7 3 -18 59.75 22.55
 7 -3 -18 24.8 7.65
 -7 -3 18 45.46 35.2
 -7 3 -18 33.62 27.08
 7 -3 19 24.69 34.8
 -7 3 19 9.61 16.65
 7 3 -19 16.59 19.92
 -7 -3 -19 36.12 19.02
 -7 -3 19 -5.42 30.36
 7 -3 -19 -4.55 9.3
 -7 3 -19 16.02 22.24
 7 -3 20 162.9 58.94
 -7 -3 -20 127.9 32.54
 7 3 -20 120 33.62
 -7 3 20 136.03 30.56
 7 -3 -20 67.32 16.95
 -7 3 -20 116.92 40.22
 -7 -3 20 148.75 53.27
 -7 -3 -21 -12.2 31.4
 7 -3 21 -3.69 25.18
 7 3 -21 20.32 21.65
 -7 3 21 -0.77 19
 7 -3 -21 8.37 7.27
 -7 3 -21 9.32 25.3
 -7 -3 21 31.96 34.39
 -7 -3 -22 22.12 21.65
 7 3 -22 22.39 37.68
 -7 3 22 12.74 20.19
 7 -3 22 10.15 28.67
 -7 -3 22 50.82 38.44
 -7 3 -22 6.28 28.31
 7 -3 23 -6.41 27.03
 -7 -3 -23 21.94 20.41
 -7 3 23 6.17 19.42
 7 3 -23 7.31 24.04
 -7 -3 23 -15.84 37.74
 -7 3 -23 16.74 27.62
 7 -3 24 1.04 32.07
 -7 -3 -24 17.53 36.6
 7 3 -24 34.62 27.98
 -7 3 24 20.28 34.25
 -7 -3 24 6.17 66.42
 -7 3 -24 25.72 32.23
 7 -3 25 -10.6 31.01
 -7 -3 -25 11.46 22.53
 -7 3 25 5.36 22.71
 7 3 -25 23.77 26.47
 -7 -3 25 26.47 29.55
 -7 3 -25 21 31.1
 7 3 -26 0.02 25.36
 -7 -3 -26 -5.15 21.49
 -7 3 26 -0.74 21.43
 7 -3 26 24.6 29.71
 -7 -3 26 25.3 29.53
 -7 3 -26 6.32 30.54
 -7 -3 -27 9.68 24.28
 -7 3 27 -3.44 23.43
 7 -3 27 32.84 33.17
 7 3 -27 19.76 27.1
 -7 -3 27 13.14 34.39
 -7 3 -27 14.27 34.84
 7 -3 28 -2.61 36.1
 -7 3 28 16.23 24.89
 7 3 -28 17.49 28.74
 -7 -3 -28 14.85 28.04
 -7 -3 28 16.32 34.89
 -7 3 -28 16.74 36.46
 7 -3 29 17.74 38.96
 -7 -3 -29 14.61 30.02
 -7 3 29 1.67 41.39
 -7 -3 29 26.27 38.49
 -7 3 -29 32.45 39.16
 -7 -3 -30 3.85 28.34
 7 -3 30 20.46 37.83
 -7 3 30 12.27 26.18
 -7 -3 30 11.66 37.95
 -7 3 -30 11.37 38.37
 -7 -3 -31 15.78 42.6
 7 -3 31 27.39 36.26
 -7 3 31 0.74 24.53
 -7 -3 31 -20.37 55.93
 -7 3 -31 -7.99 36.98
 -7 -3 -32 -7.61 25.72
 -7 3 32 -0.32 36.51
 7 -3 32 -1.69 35.97
 -7 -3 32 -1.89 33.51
 -7 3 -32 27.8 55.01
 -7 -3 -33 10.92 29.28
 7 -3 33 49.54 40.17
 -7 3 33 -3.49 28.18
 -7 3 -33 1.73 68.98
 -7 -3 33 -12.76 38.78
 -8 3 0 3.76 8.42
 8 3 0 -0.16 2.34
 8 -3 0 -6.64 11.61
 -8 -3 0 -3.74 9.5
 -8 -3 -1 11.03 6.82
 -8 3 1 20.98 11.79
 8 -3 1 -2.9 13.91
 -8 3 -1 14.85 11.32
 -8 -3 1 25.32 12.22
 8 -3 -1 26.69 13.5
 8 3 -2 0.77 2.61
 8 -3 2 -1.76 13.12
 -8 -3 -2 12.99 5.38
 -8 3 2 4.86 9.95
 -8 3 -2 29.66 12.13
 -8 -3 2 5.87 7.49
 8 -3 -2 5.72 7.18
 8 -3 -2 2.84 11.48
 8 -3 3 142.89 32.57
 -8 -3 -3 69.61 11.1
 -8 -3 -3 94.12 12.85
 -8 3 3 111.07 15.84
 -8 -3 -3 96.53 17.92
 -8 3 -3 100.74 21.52
 -8 -3 3 99.82 14.02
 8 -3 -3 81.81 11.93
 8 -3 -3 117.6 20.08
 -8 -3 -4 19.9 6.8
 -8 3 4 25.03 9.86
 8 -3 4 6.01 14.92
 -8 -3 -4 21.47 12.56
 -8 -3 -4 10.53 3.89
 -8 3 -4 27.8 13.55
 -8 -3 4 12.11 10.06
 8 -3 -4 21.7 11.25
 8 -3 -4 20.93 13.53
 8 -3 5 28.45 15.37
 -8 -3 -5 13.37 4.03
 -8 -3 -5 6.59 12.58
 -8 -3 -5 12.69 3.67
 -8 -3 5 8.39 10.47
 -8 3 -5 19.87 14.31
 8 -3 -5 16.32 7.99
 8 -3 -5 36.1 12.99
 8 -3 6 17.83 17.19
 -8 -3 -6 22.48 4.66
 -8 -3 -6 28.83 13.82
 -8 3 -6 15.42 24.08
 -8 -3 6 24.71 12.13
 8 -3 -6 31.96 12.4
 8 -3 -6 26.15 21.56
 8 -3 7 1.69 13.03
 -8 3 7 -0.72 1.17
 -8 -3 -7 4.03 10.38
 8 3 -7 0.43 1.37
 -8 -3 7 7.13 9.39
 8 -3 -7 -2.41 5.87
 -8 3 -7 7.61 12.24
 8 -3 -7 -7.27 10.13
 8 -3 8 34.82 21.79
 -8 -3 -8 54.33 15.93
 -8 -3 8 29.57 15.37
 -8 3 -8 46.07 19.51
 8 -3 -8 42.99 8.91
 8 -3 -8 41.5 24.17
 8 -3 9 3.38 15.84
 -8 -3 -9 -0.61 17.51
 -8 3 -9 9.41 13.93
 8 -3 -9 -0.54 6.03
 -8 -3 9 14.27 17.47
 8 -3 -9 -2.07 11.59
 8 -3 10 9.27 17.19
 -8 -3 -10 7.74 13.1
 8 -3 -10 5.94 9.84
 -8 3 -10 -6.93 22.75
 8 -3 -10 6.05 12.6
 8 -3 11 33.11 19.33
 -8 -3 -11 20.84 15.98
 8 -3 -11 37.05 15.37
 8 -3 -11 19 7.47
 -8 -3 11 25.5 26.15
 -8 3 -11 6.37 18.23
 8 -3 12 10.92 17.19
 -8 -3 -12 4.84 14.2
 -8 -3 12 5.04 15.82
 8 -3 -12 13.57 10.4
 8 -3 -12 7.02 7.27
 -8 3 -12 0.63 16.25
 8 -3 13 -5.02 17.89
 -8 -3 -13 16.97 14.18
 -8 3 -13 -5.99 16.86
 8 -3 -13 4.25 6.73
 8 -3 -13 5.54 4.34
 -8 -3 13 18.55 16.14
 8 -3 14 35.4 30.52
 -8 -3 -14 7.63 16.11
 -8 3 -14 -12.78 19.18
 8 -3 -14 15.46 6.66
 -8 -3 14 31.55 18.34
 8 -3 -14 7.09 7.29
 8 -3 15 42.11 25.88
 -8 -3 -15 44.99 21.22
 -8 3 -15 68.49 25.41
 8 -3 -15 50.26 6.05
 -8 -3 15 34.48 23.5
 8 -3 -15 33.53 15.01
 8 -3 16 52.8 24.26
 -8 -3 -16 45.8 20.39
 8 -3 -16 30.74 6.46
 -8 -3 16 52.89 23.9
 -8 3 -16 47.11 26.36
 8 -3 17 8.8 20.26
 -8 -3 -17 -8.21 16.83
 -8 -3 17 5.27 20.1
 8 -3 -17 6.93 4.73
 -8 3 -17 18.95 21.49
 -8 3 18 30.54 20.5
 8 -3 18 11.28 37.56
 -8 -3 -18 53.86 22.8
 8 -3 -18 21.45 5.78
 -8 -3 18 14.45 25.03
 -8 3 -18 53.39 26.22
 -8 -3 -19 18.03 19.22
 8 -3 19 -7.2 22.69
 -8 3 19 8.19 18.16
 8 -3 -19 4.82 5.06
 -8 -3 19 2.27 33.67
 -8 3 -19 13.8 23.07
 -8 -3 -20 40.53 25.91
 8 -3 20 30.05 29.17
 -8 3 20 37.59 37.02
 -8 -3 20 13.12 61.92
 -8 3 -20 29.64 30.25
 8 -3 21 80.42 35.36
 -8 -3 -21 60.27 28.99
 -8 3 21 56.24 29.12
 -8 -3 21 128.33 51
 -8 3 -21 55.03 37.54
 8 -3 22 33.31 26.94
 -8 -3 -22 -12.06 22.69
 -8 3 22 40.74 34.3
 -8 -3 22 32.79 39.72
 -8 3 -22 7.38 30.18
 -8 3 23 5.42 21.02
 -8 -3 -23 7.94 21.76
 8 3 -23 -10.96 35.92
 8 -3 23 25.14 27.75
 -8 3 -23 14.27 28.92
 -8 -3 23 10.87 39.86
 8 -3 24 24.1 31.6
 -8 -3 -24 36.12 37.34
 8 3 -24 10.15 27.28
 -8 3 24 17.71 23.32
 -8 -3 24 37.36 44.09
 -8 3 -24 -6.66 33.33
 8 -3 25 35.29 31.46
 -8 -3 -25 -2.36 23.81
 8 3 -25 14.85 27.26
 -8 3 25 22.71 24.31
 -8 3 -25 -5.31 33.38
 -8 -3 25 22.66 44.43
 8 -3 26 -19.63 30.16
 -8 -3 -26 13.39 22.87
 8 3 -26 -3.29 26.69
 -8 3 26 8.67 22.46
 -8 3 -26 2.45 31.76
 -8 -3 26 45.17 43.35
 -8 -3 -27 17.53 23.74
 8 -3 27 -15.96 31.53
 -8 3 27 6.73 24.22
 -8 -3 27 16.11 50.93
 -8 3 -27 1.58 33.08
 -8 -3 -28 13.66 22.98
 8 -3 28 -19.29 45.37
 -8 3 28 1.53 21.02
 -8 -3 28 -9 30.18
 -8 3 -28 -7.11 30.86
 -8 -3 -29 -0.43 27.75
 8 -3 29 30.7 53.3
 -8 3 29 8.42 25.43
 -8 3 -29 -7.2 36.6
 -8 -3 29 17.65 35.81
 8 -3 30 -2.03 59.48
 -8 -3 -30 17.74 30.43
 -8 3 30 1.31 43.21
 -8 -3 30 9.18 39
 -8 3 -30 16.56 39.93
 -8 -3 -31 23.74 42.09
 8 -3 31 -11.19 55.61
 -8 3 31 -6.66 25.52
 -8 -3 31 1.67 36.1
 -8 3 -31 16.05 36.96
 -8 -3 -32 -9.7 29.28
 8 -3 32 14.34 59.87
 -8 3 32 10.24 26.45
 -8 -3 32 -7.63 39.39
 -8 3 -32 35.61 40.29
 8 -3 33 8.21 73.46
 -8 3 33 33.11 54.62
 -8 3 -33 41.95 49.49
 -8 -3 33 20.44 75.76
 -9 3 0 4.01 10.76
 -9 -3 0 4.25 7.49
 9 -3 0 28.7 13.46
 9 3 -1 0.14 1.73
 -9 -3 -1 6.41 6.1
 -9 -3 -1 4.59 9.79
 -9 -3 -1 2.21 5.63
 -9 3 1 21.94 15.51
 9 -3 1 -16.56 12.58
 -9 -3 1 5.06 11.12
 -9 3 -1 2.63 11.28
 9 -3 -1 10.62 11.93
 -9 -3 -2 12.78 6.64
 -9 -3 -2 13.53 11.93
 -9 -3 -2 4.41 8.87
 -9 3 2 14.31 11.14
 9 -3 2 0.23 14.76
 -9 -3 2 14.36 13.98
 -9 3 -2 11.43 13.68
 9 -3 -2 8.37 7.29
 9 -3 -2 5.87 14.63
 9 -3 3 42.78 19.4
 -9 -3 -3 48.82 7.83
 -9 -3 -3 68.62 23.47
 -9 3 3 50.44 13.55
 -9 -3 -3 41.19 6.5
 -9 -3 3 49.29 18.95
 9 -3 -3 38.35 18.61
 -9 3 -3 48.59 16.34
 9 -3 -3 50.03 14.25
 9 -3 4 18.95 17.04
 -9 -3 -4 26.6 8.78
 -9 3 4 32.88 10.69
 -9 -3 -4 21.43 13.35
 -9 -3 -4 14.85 5.33
 -9 -3 4 34.89 17.69
 -9 3 -4 23.92 14.76
 9 -3 -4 20.66 7.4
 9 -3 -4 25.07 15.19
 9 -3 5 11.32 16.18
 -9 3 5 17.38 9.05
 -9 -3 -5 11.46 4.55
 -9 -3 -5 5.38 12.81
 -9 -3 -5 6.59 3.89
 -9 3 -5 20.86 22.35
 -9 -3 5 4.39 11.1
 9 -3 -5 16.2 6.44
 9 -3 -5 18.14 13.77
 -9 -3 -6 32.5 6.37
 9 -3 6 50.64 19.67
 -9 -3 -6 40.83 6.59
 -9 -3 -6 28.67 15.24
 -9 3 -6 53.14 17.47
 -9 -3 6 28.36 14.38
 9 -3 -6 40.35 15.75
 9 -3 -6 26.06 11.01
 -9 -3 -7 7.9 3.56
 -9 -3 -7 22.42 12.9
 9 -3 7 12.02 25.36
 -9 -3 7 13.17 12.74
 -9 3 -7 24.91 15.37
 9 -3 -7 9.25 8.78
 9 -3 -7 18.39 13.12
 9 -3 8 45.91 22.15
 -9 -3 -8 50.1 27.1
 -9 3 -8 80.33 21.45
 -9 -3 8 67.32 18.03
 9 -3 -8 58.09 7.65
 9 -3 -8 37.32 18.88
 9 -3 9 2.16 18.07
 -9 -3 -9 18.01 14.61
 -9 -3 9 8.55 14.65
 -9 3 -9 1.22 24.98
 9 -3 -9 13.71 8.24
 9 -3 -9 23.74 14.11
 9 -3 10 64.14 38.35
 -9 -3 -10 58.13 19.22
 -9 -3 10 66.03 19.72
 -9 3 -10 42.85 21.11
 9 -3 -10 55.37 11.32
 9 -3 -10 39.59 19.51
 9 -3 11 13.05 18.61
 -9 -3 -11 0.83 13.35
 9 -3 -11 -0.92 13.86
 -9 3 -11 10.51 15.57
 9 -3 -11 4.97 4.86
 -9 -3 11 -6.91 14.47
 9 -3 12 9.16 17.76
 -9 -3 -12 4.37 13.12
 -9 -3 12 7.25 14.02
 9 -3 -12 2.66 6.91
 -9 3 -12 6.01 15.26
 9 -3 -12 -0.61 3.56
 9 -3 13 23.61 28.29
 -9 -3 -13 8.67 14.83
 -9 -3 13 -2 16.09
 9 -3 -13 2.32 4.64
 9 -3 -13 5.31 3.38
 -9 3 -13 1.37 17.1
 9 -3 14 7.85 20.01
 -9 -3 -14 7.09 16.54
 -9 -3 14 24.17 27.68
 9 -3 -14 9.12 5.04
 9 -3 -14 11.79 7.27
 -9 3 -14 17.69 20.14
 9 -3 15 9.39 19.45
 -9 -3 -15 11.32 16.27
 9 -3 -15 4.21 4.86
 -9 -3 15 2.45 28.65
 -9 3 -15 25.18 19.78
 9 -3 16 32.43 18.97
 -9 -3 -16 7.31 16.63
 9 -3 -16 1.71 4.23
 -9 -3 16 1.6 19.24
 -9 3 -16 -2.9 19.38
 9 -3 17 14.16 34.5
 -9 -3 -17 4.88 32.45
 -9 -3 17 27.08 22.51
 -9 3 -17 -0.23 24.01
 -9 3 18 117.28 43.05
 9 -3 18 87.87 31.17
 -9 -3 -18 48.57 30.07
 -9 -3 18 86.38 33.96
 -9 3 -18 57.46 53.48
 -9 3 19 2.84 22.69
 9 -3 19 24.62 25.68
 -9 -3 -19 40.58 24.71
 -9 -3 19 18.46 26.47
 -9 3 -19 29.84 43.8
 -9 -3 -20 87.44 53.23
 9 -3 20 102.74 37.41
 -9 3 20 87.37 49.6
 -9 -3 20 107.92 41.07
 -9 3 -20 142.47 64.19
 -9 -3 -21 -0.7 24.55
 9 -3 21 34.66 27.86
 -9 3 21 20.21 25.86
 -9 3 -21 12.29 47.62
 -9 -3 21 43.08 29.69
 9 -3 22 8.17 24.53
 -9 -3 -22 -7.22 21.63
 -9 3 22 14.36 21.79
 -9 -3 22 35.63 40.69
 -9 3 -22 -23.97 43.28
 9 -3 23 11.25 23.11
 -9 -3 -23 -18.93 20.46
 -9 3 23 14.47 19.15
 -9 -3 23 1.85 35.04
 -9 3 -23 -15.91 26.58
 9 -3 24 43.03 47.31
 -9 -3 -24 6.71 25.39
 -9 3 24 23.92 25.91
 -9 -3 24 3.69 46.7
 -9 3 -24 25.41 35.45
 -9 -3 -25 13.73 27.23
 9 -3 25 30.63 53.54
 -9 3 25 26.45 41.82
 -9 -3 25 49.76 49.49
 -9 3 -25 12.69 37.2
 9 -3 26 29.15 47.42
 -9 -3 -26 9.99 24.15
 -9 3 26 1.89 24.49
 -9 3 -26 -3.94 32.34
 -9 -3 26 -13.8 44.63
 9 -3 27 -0.7 38.06
 -9 -3 -27 22.33 45.89
 -9 3 27 25.84 30.43
 -9 -3 27 29.35 54.51
 -9 3 -27 37.38 41.73
 9 -3 28 -13.37 35.47
 -9 3 28 13.21 41.39
 -9 -3 -28 -7.76 29.1
 -9 -3 28 14.72 51.79
 -9 3 -28 -32.43 38.35
 -9 -3 -29 16.09 28.29
 9 -3 29 -15.28 34.25
 -9 3 29 -11.37 25.36
 -9 -3 29 -10.26 55.41
 -9 3 -29 -10.33 37.27
 9 -3 30 3.38 41.16
 -9 -3 -30 24.31 32.34
 -9 3 30 3.29 29.51
 -9 -3 30 30.68 41.28
 -9 3 -30 6.32 42.67
 -9 -3 -31 4.32 40.74
 -9 3 31 13.35 38.6
 9 -3 31 -17.65 33.35
 -9 -3 31 -1.78 34.55
 -9 3 -31 5.09 35.9
 -9 -3 -32 -8.67 27.57
 9 -3 32 34.95 34.5
 -9 3 32 -9.75 25.36
 -9 -3 32 -1.49 34.98
 -9 3 -32 4.73 37.41
 -10 -3 0 108.82 15.64
 -10 3 0 94.68 28.88
 10 -3 0 116.76 25.21
 -10 -3 0 121.67 20.03
 -10 3 1 3.17 11.07
 -10 -3 -1 12.67 8.15
 -10 -3 -1 10.71 12.33
 -10 -3 -1 10.06 7.18
 10 -3 1 10.08 15.62
 -10 3 -1 12.09 14.27
 -10 -3 1 14.04 9.66
 10 -3 -1 11.86 15.98
 -10 -3 -2 0.7 7.07
 -10 -3 -2 6.37 11.34
 -10 -3 -2 2.54 5.76
 -10 3 2 12.42 10.87
 10 -3 2 23.79 14.65
 -10 3 -2 14.56 18.86
 -10 -3 2 1.01 9.5
 10 -3 -2 -2.21 15.01
 -10 -3 -3 68.35 10.49
 -10 -3 -3 81.18 18.57
 -10 3 3 64.53 16.45
 -10 -3 -3 59.35 9.23
 10 -3 3 89.96 23.56
 -10 3 -3 73.57 20.12
 -10 -3 3 83.21 15.71
 10 -3 -3 96.28 32.43
 10 -3 -3 61.4 11.5
 10 -3 4 32.45 22.53
 10 3 -4 1.44 1.6
 -10 -3 -4 3.11 8.1
 -10 -3 -4 -1.13 16.83
 -10 3 4 2.57 8.8
 -10 -3 -4 -2.16 5.04
 -10 3 -4 6.5 12.47
 -10 -3 4 10.38 9.66
 10 -3 -4 0.97 13.32
 10 -3 -4 -0.77 6.35
 -10 3 5 32.36 11.39
 -10 -3 -5 44.92 16.25
 -10 -3 -5 33.29 10.2
 10 -3 5 39.79 20.03
 -10 -3 -5 31.42 9.63
 -10 -3 5 43.21 14.54
 10 -3 -5 36.3 26.63
 -10 3 -5 47.13 17.8
 10 -3 -5 35.63 12.69
 10 -3 6 9.45 30.14
 -10 -3 -6 20.05 5.31
 -10 -3 -6 19.96 7.45
 -10 -3 -6 28.11 15.17
 -10 -3 6 27.73 14.4
 10 -3 -6 42.15 16.02
 -10 3 -6 36.75 17.22
 10 -3 -6 22.62 10.92
 10 -3 7 10.11 15.73
 -10 -3 -7 3.58 5.06
 -10 -3 -7 -2.34 5.29
 -10 -3 -7 6.21 12.22
 -10 3 -7 -1.49 14.88
 -10 -3 7 5.31 11.75
 10 -3 -7 4.55 20.14
 10 -3 -7 8.21 7.58
 -10 -3 -8 1.53 3.04
 10 3 -8 1.55 2.32
 10 -3 8 -9.95 15.69
 -10 -3 -8 1.24 2.88
 -10 -3 -8 -0.45 12.81
 -10 -3 8 31.08 18.93
 -10 3 -8 8.76 21.56
 10 -3 -8 8.1 13.14
 10 -3 -8 3.11 6.89
 10 -3 9 11.03 27.35
 -10 -3 -9 4.68 14.38
 -10 -3 9 7.92 21.85
 -10 3 -9 17.04 15.75
 10 -3 -9 17.65 22.62
 10 -3 -9 2.93 6.93
 10 -3 10 -1.51 16.09
 -10 -3 -10 -4.82 12.65
 10 3 -10 0.72 1.55
 10 -3 -10 13.1 13.17
 -10 -3 10 4.84 13.8
 -10 3 -10 16.52 15.26
 10 -3 -10 1.15 3.62
 10 -3 11 32.68 20.17
 -10 -3 -11 20.23 15.82
 10 -3 -11 20.57 16.7
 -10 -3 11 14.61 17.76
 -10 3 -11 3.35 19.51
 10 -3 -11 13.89 6.14
 10 -3 12 15.12 27.86
 -10 -3 -12 17.8 14.61
 -10 3 -12 13.39 17.8
 -10 -3 12 11.01 16.25
 10 -3 -12 1.19 4.39
 -10 -3 -13 9.39 14.13
 10 -3 13 -17.4 19.18
 10 3 -13 1.31 2.14
 10 -3 -13 -1.17 2.54
 -10 -3 13 8.17 15.8
 -10 3 -13 7.43 16.36
 10 -3 14 47.11 28.56
 -10 -3 -14 37.09 21.4
 -10 -3 14 42.29 24.22
 -10 3 -14 37.59 26.36
 10 -3 15 26.85 27.03
 -10 -3 -15 21.07 20.5
 -10 -3 15 33.24 23.61
 -10 3 -15 24.15 39.75
 10 -3 16 52.31 49.45
 -10 -3 -16 33.13 39.95
 -10 -3 16 56.09 28.27
 -10 3 -16 54.47 47.51
 10 -3 17 -12.18 20.1
 -10 -3 -17 2.32 18.52
 -10 -3 17 21.74 30.18
 -10 3 -17 8.21 31.55
 -10 3 18 12.51 29.71
 10 -3 18 3.51 21.58
 -10 -3 -18 4.79 20.37
 -10 -3 18 -4.66 22.57
 -10 3 -18 10.29 35.27
 -10 -3 -19 5.15 22.01
 10 -3 19 -2.66 23.32
 -10 3 19 2.9 20.26
 -10 -3 19 18.82 24.46
 -10 3 -19 10.13 37.36
 -10 3 20 37.88 22.8
 10 -3 20 9.05 25.81
 -10 -3 -20 -14.31 23.29
 -10 -3 20 29.51 28.94
 -10 3 -20 2.99 42.81
 10 -3 21 13.64 26.27
 -10 -3 -21 34.93 23.18
 -10 3 21 -4.88 24.44
 -10 3 -21 15.01 43.98
 -10 -3 21 -8.51 28.49
 10 -3 22 41.01 47.31
 -10 -3 -22 16.18 27.48
 -10 3 22 35.88 28.2
 -10 -3 22 4.25 33.33
 -10 3 -22 23.41 51.52
 10 -3 23 3.26 30.77
 -10 -3 -23 41.39 41.03
 -10 3 23 31.06 44.14
 -10 3 -23 58.22 53.72
 -10 -3 23 4.01 34.1
 10 -3 24 27.75 28.02
 -10 -3 -24 10.98 25.09
 -10 3 24 -12.92 25.12
 -10 -3 24 25.03 48.28
 -10 3 -24 -17.33 50.89
 10 -3 25 9.32 29.08
 -10 -3 -25 -13.1 24.87
 -10 3 25 2.12 25.75
 -10 3 -25 7.79 52.42
 -10 -3 25 72.52 45.73
 10 -3 26 17.76 27.44
 -10 -3 -26 -3.15 23.45
 -10 3 26 -2.23 36.89
 -10 -3 26 -31.73 42.67
 -10 3 -26 -1.6 31.24
 10 -3 27 36.71 35.29
 -10 -3 -27 6.41 32.5
 -10 3 27 12.11 31.71
 -10 3 -27 -1.04 39.9
 -10 -3 27 61.58 55.86
 10 -3 28 -3.67 33.8
 -10 -3 -28 2.88 29.89
 -10 3 28 -11.28 28.97
 -10 3 -28 26.33 37.92
 -10 -3 28 53.09 51.29
 10 -3 29 -15.35 30.43
 -10 3 29 9.99 24.8
 -10 -3 -29 -26.63 26.87
 -10 -3 29 66.6 46.84
 -10 3 -29 6.3 33.71
 10 -3 30 34.41 38.17
 -10 -3 -30 5.4 33.92
 -10 3 30 -2.63 31.55
 -10 -3 30 0.32 92.3
 -10 3 -30 26.29 42.81
 -10 -3 -31 -1.98 31.46
 10 -3 31 15.19 37.16
 -10 3 31 8.01 30.56
 -10 -3 31 -9.81 40.67
 -10 3 -31 35.92 41.88
 -11 3 0 2.32 12.18
 -11 -3 0 8.17 12.69
 -11 -3 0 4.59 10.87
 11 -3 0 -14.94 15.03
 -11 3 1 -1.96 12.04
 -11 -3 -1 8.15 14.07
 -11 -3 -1 26.6 13.17
 11 -3 1 20.41 16.7
 -11 3 -1 13.59 15.53
 -11 -3 1 4.82 16.45
 -11 -3 1 17.94 13.05
 11 -3 -1 22.91 17.51
 -11 -3 -2 -2.9 12.2
 -11 -3 -2 21.43 19.2
 -11 -3 -2 7.09 7.18
 11 -3 2 28 16.34
 -11 3 2 2.25 18.1
 -11 3 -2 5.92 13.59
 -11 -3 2 7.47 16.29
 -11 -3 2 1.19 12.04
 11 -3 -2 13.05 23.61
 -11 -3 -3 14.79 12.33
 -11 -3 -3 19.06 13.53
 -11 -3 -3 7.81 7.88
 -11 3 3 15.53 18.75
 11 -3 3 32.57 28
 -11 3 -3 9.84 15.78
 11 -3 -3 14.45 13.17
 -11 -3 3 42.15 19.38
 11 -3 -3 15.35 16.34
 -11 -3 -4 0.27 10.4
 -11 -3 -4 7 13.32
 -11 3 4 10.33 16.54
 -11 -3 -4 9.52 6.19
 11 -3 4 2.25 17.74
 -11 3 -4 9.03 22.6
 11 -3 -4 9.79 11.43
 -11 -3 4 2.45 18.97
 11 -3 -4 19.78 24.87
 11 3 -5 -0.81 1.64
 -11 -3 -5 8.87 8.03
 -11 -3 -5 5.83 17.15
 -11 3 5 -6.59 12.76
 -11 -3 -5 5.33 7.47
 11 -3 5 -8.57 14.88
 11 -3 -5 11.77 9.14
 -11 3 -5 1.42 12.94
 -11 -3 5 2.75 10.85
 11 -3 -5 -16.97 13.03
 11 -3 6 25.84 16.52
 -11 -3 -6 0.59 4.82
 11 3 -6 4.66 2.59
 -11 -3 -6 7.27 13.35
 -11 -3 -6 0.9 5.22
 -11 3 -6 5.65 15.42
 11 -3 -6 2.9 9.3
 -11 -3 6 11.48 12.76
 11 -3 -6 8.44 14.52
 11 -3 7 19.99 17.47
 -11 -3 -7 -1.26 4.79
 -11 -3 -7 8.3 13.53
 -11 -3 -7 2.23 4.34
 11 -3 -7 5.94 8.53
 -11 3 -7 35.65 24.37
 -11 -3 7 9.39 13.64
 11 -3 -7 10.69 14.63
 11 -3 8 1.78 26.87
 -11 -3 -8 6.03 5.42
 -11 -3 -8 28.63 22.17
 -11 -3 -8 3.17 3.58
 11 -3 -8 3.69 7.9
 -11 -3 8 13.12 14.31
 -11 3 -8 4.3 15.48
 11 -3 -8 8.21 15.46
 11 3 -9 0.45 1.76
 11 -3 9 -11.46 16.83
 -11 -3 -9 1.73 3.35
 -11 -3 -9 1.42 2.16
 -11 -3 -9 11.23 12.87
 11 -3 -9 0.97 3.98
 11 -3 -9 22.87 14.97
 -11 -3 9 6.39 13.8
 -11 3 -9 6.37 14.94
 11 3 -10 -0.38 1.6
 11 -3 10 -6.66 16.56
 -11 -3 -10 7.43 13.1
 11 -3 -10 -9.95 14.65
 -11 -3 10 21.11 13.71
 -11 3 -10 7.83 15.37
 11 -3 11 -22.12 31.69
 -11 -3 -11 -3.92 25.39
 -11 -3 11 -0.68 17.65
 -11 3 -11 -24.46 19.38
 11 -3 -11 -3.26 20.68
 11 -3 12 -19.85 19.65
 -11 -3 -12 2.34 15.51
 -11 -3 12 22.08 27.26
 -11 3 -12 17.56 18.84
 11 -3 13 6.44 20.48
 -11 -3 -13 -10.56 16.68
 -11 -3 13 28.4 18.82
 -11 3 -13 -1.69 20.05
 11 -3 14 17.33 22.26
 -11 -3 -14 14.67 17.87
 -11 -3 14 -12.54 20.86
 -11 3 -14 19.96 34.21
 -11 -3 -15 12.65 32.99
 -11 -3 15 20.05 23.72
 -11 3 -15 15.15 39.14
 11 -3 16 -12.36 22.62
 -11 -3 -16 5.67 18.52
 11 3 -16 1.51 1.51
 -11 3 -16 9.81 30.88
 -11 -3 16 -3.85 20.28
 11 -3 17 17.62 23.07
 -11 -3 -17 -7.2 19.06
 -11 -3 17 -5.18 20.84
 -11 3 -17 6.89 33.38
 11 -3 18 -17.58 26.22
 -11 -3 -18 -21.38 22.1
 -11 -3 18 9.5 24.1
 -11 3 -18 7.83 24.58
 11 -3 19 24.71 31.26
 -11 -3 -19 3.96 25.16
 -11 3 19 35.34 24.96
 -11 -3 19 25.88 43.91
 -11 3 -19 20.35 29.78
 11 -3 20 -8.12 41.77
 -11 -3 -20 23.65 21.97
 -11 3 20 -14.61 22.1
 -11 3 -20 12.72 26.74
 -11 -3 20 1.37 27.05
 11 -3 21 4.68 25.97
 -11 -3 -21 18.88 23.47
 -11 3 21 -12.06 25.07
 -11 3 -21 13.73 28.58
 -11 -3 21 9.12 28.79
 -11 -3 -22 4.14 39.32
 -11 3 22 17.13 26.76
 11 -3 22 11.25 27.73
 -11 -3 22 12.99 31.04
 -11 3 -22 -18.03 47.51
 11 -3 23 6.57 29.98
 -11 -3 -23 6.82 25.45
 -11 3 23 24.06 28.65
 -11 -3 23 6.1 34.03
 -11 3 -23 31.08 52.04
 11 -3 24 -11.43 29.35
 -11 -3 -24 -2.88 25.3
 -11 3 24 21 26.36
 -11 -3 24 28.29 31.98
 -11 3 -24 -0.38 51.18
 11 -3 25 3.33 29.15
 -11 3 25 13.73 27.86
 -11 -3 -25 -8.06 25.91
 -11 3 -25 9.86 52.76
 -11 -3 25 10.71 32.34
 11 -3 26 2.75 33.49
 -11 -3 -26 27.35 45.89
 -11 3 26 17.94 50.03
 -11 3 -26 24.26 61.13
 -11 -3 26 -3.38 84.56
 11 -3 27 19.27 33.24
 -11 3 27 15.98 31.15
 -11 -3 -27 -1.1 31.64
 -11 -3 27 32.77 53.68
 -11 3 -27 -14.04 39.79
 11 -3 28 17.35 33.2
 -11 -3 -28 -1.04 32.34
 -11 3 28 -0.52 31.89
 -11 3 -28 9.32 40.26
 -11 -3 28 35.52 55.46
 11 -3 29 4.73 36.39
 -11 -3 -29 -2.21 34.48
 -11 3 29 31.49 52.33
 -11 -3 29 6.64 58.88
 -11 3 -29 35.92 43.51
 11 -3 30 17.4 34.28
 -11 3 30 1.67 29.33
 -11 -3 -30 -8.21 48.28
 -11 -3 30 -18.57 54.65
 -11 3 -30 9.72 39.57
 -12 3 0 35.61 18.43
 -12 -3 0 22.82 12.81
 -12 -3 0 41.88 24.06
 12 -3 0 60.16 23.2
 -12 3 1 30.23 13.68
 -12 -3 -1 15.69 10.8
 -12 -3 -1 19.6 14.76
 12 -3 1 32.23 20.05
 -12 3 -1 1.42 27.17
 -12 -3 1 15.57 14.43
 -12 -3 1 20.03 12.38
 12 -3 -1 46.95 29.33
 -12 3 2 22.15 19.09
 -12 -3 -2 10.83 9.72
 -12 -3 -2 5.09 13.82
 12 -3 2 22.35 18.75
 -12 3 -2 33.44 15.66
 -12 -3 2 13.82 13.35
 -12 -3 2 18.55 12.45
 12 -3 -2 8.53 18.14
 -12 -3 -3 5.15 8.37
 -12 -3 -3 -4.91 21.58
 -12 -3 -3 14.97 11.91
 12 -3 3 3.74 18.01
 -12 3 3 20.55 12.51
 -12 -3 3 20.05 12.51
 -12 3 -3 14.58 15.69
 -12 -3 3 4.88 20.46
 12 -3 -3 14.65 17.42
 -12 -3 -4 17.96 15.01
 -12 -3 -4 9.18 8.15
 -12 3 4 16.61 11.93
 12 -3 4 15.98 18.91
 -12 -3 -4 15.3 11.95
 -12 3 -4 16.9 16.29
 12 -3 -4 2.99 9.09
 -12 -3 4 17.83 13.44
 -12 -3 4 26.45 13.35
 12 -3 -4 -0.16 17.22
 -12 -3 -5 4.1 6.95
 12 -3 5 26.45 19.38
 -12 -3 -5 7.16 14.65
 -12 -3 -5 3.02 6.95
 -12 3 5 7.07 10.31
 12 -3 -5 8.91 7.74
 -12 -3 5 13.5 13.44
 -12 -3 5 21.56 12.4
 12 -3 -5 34.3 17.13
 -12 3 -5 10.26 16.7
 -12 -3 -6 12.47 11.07
 -12 -3 -6 9.34 7
 -12 3 6 10.69 15.03
 -12 -3 -6 28.63 15.96
 12 -3 6 34.64 21.09
 -12 3 -6 19.27 18.88
 -12 -3 6 18.52 23.5
 12 -3 -6 15.08 18.61
 -12 -3 -7 22.24 16.38
 -12 -3 -7 14.61 9.7
 12 -3 7 47.24 34.25
 12 -3 -7 7.09 19.81
 -12 -3 7 26.85 26.96
 -12 3 -7 42.38 31.46
 12 -3 8 0.05 20.05
 -12 -3 -8 17.65 15.19
 -12 -3 -8 3.58 7.61
 -12 3 -8 15.78 17.26
 -12 -3 8 3.6 15.91
 12 -3 -8 19.6 26.67
 12 -3 9 9.84 22.01
 -12 -3 -9 -1.73 16.74
 -12 -3 9 14.13 18.34
 -12 3 -9 20.73 19.27
 12 -3 -9 24.46 19.49
 12 -3 10 35.83 32.14
 -12 -3 -10 -8.42 23.9
 -12 -3 10 3.71 17.94
 -12 3 -10 4.19 18.88
 12 -3 -10 10.98 18.7
 12 3 -11 -1.01 1.71
 -12 -3 -11 6.82 14.49
 12 -3 11 0.72 19.02
 -12 -3 11 15.78 16.23
 -12 3 -11 -8.57 17.33
 12 3 -12 0.34 2.5
 12 -3 12 26.22 19.36
 -12 -3 -12 7.76 15.39
 -12 3 -12 -5.99 19
 -12 -3 12 1.06 17.01
 12 -3 13 8.51 24.49
 -12 -3 -13 15.12 19.58
 -12 -3 13 29.64 22.42
 -12 3 -13 6.32 23.9
 -12 -3 -14 -3.53 31.98
 12 -3 14 -0.11 37.25
 -12 -3 14 22.19 34.98
 -12 3 -14 28.76 37.97
 12 -3 15 30.11 24.04
 -12 -3 -15 6.14 20.98
 -12 3 -15 28.22 36.93
 -12 -3 15 -17.71 23.72
 12 -3 16 6.1 23.52
 -12 -3 -16 7.7 21.13
 -12 3 -16 9.93 37.5
 -12 -3 16 1.76 23.43
 12 -3 17 11.82 24.69
 -12 -3 -17 3.06 21.7
 -12 -3 17 2.09 24.73
 -12 3 -17 4.93 25.18
 12 -3 18 -13.53 33.94
 -12 -3 -18 0.83 18.86
 12 3 -18 -0.5 2.34
 -12 -3 18 8.39 22.26
 -12 3 -18 24.78 22.91
 12 -3 19 -19.09 39.05
 -12 -3 -19 14.07 20.19
 -12 3 19 -8.96 20.71
 -12 -3 19 -15.71 23.81
 -12 3 -19 13.53 24.01
 -12 3 20 15.24 24.76
 -12 -3 -20 5.67 23.86
 12 -3 20 17.85 29.8
 -12 -3 20 -3.74 45.19
 -12 3 -20 0.56 29.57
 12 -3 21 -8.03 32.14
 -12 -3 -21 5.47 26.51
 -12 3 21 26.04 43.28
 -12 -3 21 29.37 51.47
 -12 3 -21 29.66 32.05
 12 -3 22 9.75 31.35
 -12 -3 -22 10.11 25.45
 -12 3 22 8.3 26.87
 -12 3 -22 19.38 32.25
 -12 -3 22 -13.05 33.02
 12 -3 23 6.44 32.34
 -12 -3 -23 11.25 26.36
 -12 3 23 10.42 29.73
 -12 -3 23 6.66 34.82
 -12 3 -23 13.46 51.99
 12 -3 24 -4.73 29.08
 -12 3 24 -8.17 26.18
 -12 -3 -24 10.89 24.08
 -12 3 -24 -14.13 48.5
 -12 -3 24 9.36 30.72
 12 -3 25 14.27 35.99
 -12 -3 -25 7.56 30.16
 -12 3 25 2.23 32.25
 -12 3 -25 62.23 59.57
 -12 -3 25 21.22 38.46
 12 -3 26 28.88 53.52
 -12 -3 -26 4.07 31.62
 -12 3 26 -8.51 31.33
 -12 3 -26 29.82 60.61
 -12 -3 26 17.6 37.83
 -12 -3 -27 -14.72 33.2
 12 -3 27 -3.4 53.03
 -12 3 27 22.93 34.03
 -12 -3 27 -1.8 61.08
 -12 3 -27 40.74 41.48
 12 -3 28 4.14 48.16
 -12 3 28 -7.97 30.59
 -12 -3 -28 8.69 29.96
 -12 3 -28 0.72 37.86
 -12 -3 28 8.46 51.9
 12 -3 29 32.57 33.8
 -12 -3 -29 -15.08 31.64
 -12 3 29 -10.62 32.9
 -12 3 -29 -3.42 40.62
 -12 -3 29 59.15 55.77
 -13 3 0 12.99 14.27
 -13 -3 0 -6.44 12.36
 13 -3 0 1.31 25.84
 -13 -3 0 3.6 15.51
 -13 3 1 29.8 20.3
 -13 -3 -1 15.91 16.16
 -13 -3 -1 5.99 21.04
 13 -3 1 26.58 19.85
 -13 3 -1 -10.56 22.69
 -13 -3 1 4.82 12.27
 -13 -3 1 -2 13.17
 13 -3 -1 12.72 18.39
 -13 3 2 15.46 14.4
 -13 -3 -2 19.6 17.78
 -13 -3 -2 39.77 16.68
 13 -3 2 49 23.27
 -13 -3 2 16.38 14.88
 -13 3 -2 16.54 18.48
 -13 -3 2 27.41 22.71
 13 -3 -2 44.05 21.63
 -13 -3 -3 11.14 14.85
 -13 -3 -3 -3.13 13.95
 -13 3 3 8.85 12.99
 -13 3 -3 13.89 16.65
 -13 -3 3 11.91 13.5
 -13 -3 3 25.86 13.37
 13 -3 -3 -11.7 17.24
 -13 -3 -4 -1.22 13.62
 -13 -3 -4 5.13 11.59
 -13 3 4 5.92 10.67
 13 -3 4 5.72 17.6
 -13 3 -4 -5.02 15.17
 -13 -3 4 -9.43 12.51
 -13 -3 4 -5.51 11.52
 13 -3 -4 24.24 15.55
 -13 -3 -5 7.49 20.71
 -13 -3 -5 2.23 10.94
 -13 3 5 -6.86 9.54
 13 -3 5 13.57 17.6
 -13 -3 5 0.95 13.12
 -13 -3 5 4.55 11.43
 -13 3 -5 8.03 15.87
 13 -3 -5 5.63 25.41
 -13 3 6 6.75 9.05
 -13 -3 -6 14.49 14.67
 -13 -3 -6 7.56 11.12
 13 -3 6 -8.94 32.07
 -13 3 -6 7.97 18.46
 -13 -3 6 8.06 12.87
 13 -3 -6 -4.95 18.34
 -13 -3 6 6.37 14.83
 -13 -3 -7 -7.29 9.18
 -13 -3 -7 5.04 14.79
 13 -3 7 13.89 19.92
 -13 -3 7 10.08 14.72
 -13 3 -7 19.27 26.13
 -13 -3 7 4.48 11.93
 13 -3 -7 11.21 17.17
 -13 -3 -8 20.62 21.83
 -13 -3 -8 -3.58 5.18
 13 -3 8 21.2 18.48
 -13 -3 8 12.29 22.57
 -13 3 -8 25.7 16.43
 -13 -3 8 -6.44 10.74
 13 -3 -8 -2.93 17.38
 13 -3 9 76.21 45.4
 -13 -3 -9 32.39 22.01
 -13 -3 9 37.77 37.54
 -13 3 -9 36.66 26.22
 13 -3 -9 57.17 25.75
 13 -3 10 16.34 25.05
 -13 -3 -10 11.05 19.54
 -13 -3 10 35.04 21.49
 -13 3 -10 14.45 22.8
 13 -3 -10 9.63 22.87
 13 -3 11 -9.43 20.57
 -13 -3 -11 0.36 15.71
 13 3 -11 0.92 1.78
 -13 3 -11 4.14 18.68
 -13 -3 11 -10.94 17.78
 13 -3 12 -1.17 21.47
 -13 -3 -12 -2.41 26.51
 13 3 -12 1.46 2.72
 -13 -3 12 23.14 19.2
 -13 3 -12 6.39 20.73
 -13 -3 -13 23.34 21.36
 13 -3 13 8.12 25.79
 -13 -3 13 4.43 22.24
 -13 3 -13 -5.2 37.34
 13 -3 14 24.01 28.29
 -13 -3 -14 13.66 22.96
 -13 -3 14 19.27 24.64
 -13 3 -14 17.69 41.5
 13 -3 15 -2.43 26.63
 -13 -3 -15 8.94 22.78
 -13 -3 15 -3.4 37.5
 -13 3 -15 43.44 38.44
 13 -3 16 26.76 31.73
 -13 -3 -16 42.83 42.49
 -13 -3 16 40.06 46.61
 -13 3 -16 9.81 48.97
 13 -3 17 47.85 49.27
 -13 -3 -17 17.22 25.63
 -13 -3 17 31.04 31.08
 -13 3 -17 18.28 32.21
 -13 -3 -18 0.29 23.92
 13 -3 18 16.43 27.89
 -13 3 -18 1.58 29.53
 -13 -3 18 22.62 28.65
 13 -3 19 3.13 29.75
 -13 -3 -19 8.8 25.23
 -13 3 19 9.36 26.49
 -13 -3 19 18.37 29.57
 -13 3 -19 20.73 31.08
 13 -3 20 -5.94 26.6
 -13 3 20 11.32 24.6
 -13 -3 -20 -1.37 23.74
 -13 -3 20 6.68 28.04
 -13 3 -20 7.18 28.38
 13 -3 21 13.68 25.54
 -13 -3 -21 -3.65 22.06
 -13 3 21 5.09 38.64
 -13 3 -21 -10.17 29.1
 -13 -3 21 1.37 27.46
 13 -3 22 13.19 28.22
 -13 -3 -22 15.21 25.66
 -13 3 22 -26.27 28.65
 -13 3 -22 24.42 32.88
 13 -3 23 -9.9 46.61
 -13 -3 -23 32.88 28
 -13 3 23 17.74 30.83
 -13 -3 23 -18.3 35.9
 -13 3 -23 -22.24 54.29
 13 -3 24 16.79 55.32
 -13 -3 -24 4.03 28.9
 -13 3 24 13.26 31.51
 -13 3 -24 17.56 57.44
 -13 -3 24 10.51 38.44
 13 -3 25 11.55 36.71
 -13 -3 -25 15.17 52.22
 -13 3 25 18.3 33.6
 -13 3 -25 -22.66 61.96
 -13 -3 25 22.89 40.69
 -13 3 26 6.59 31.35
 13 -3 26 -3.13 33.87
 -13 -3 -26 -4.05 31.85
 -13 -3 26 19.92 37.47
 -13 3 -26 15.08 60.48
 13 -3 27 28.18 41.64
 -13 -3 -27 15.21 39.32
 -13 3 27 40.35 39.86
 -13 3 -27 46.68 75.22
 -13 -3 27 13.44 47.44
 13 -3 28 29.75 39.59
 -13 -3 -28 -0.36 36.82
 -13 3 28 19.6 37.9
 -13 -3 28 29.44 69.21
 -13 3 -28 13.23 46.07
 -14 3 0 60.95 26.27
 -14 -3 0 102.52 21.97
 -14 -3 0 64.53 28.54
 14 -3 0 97.9 29.51
 -14 -3 -1 15.46 12.6
 -14 -3 -1 37.43 16.65
 14 -3 1 6.32 22.89
 -14 3 -1 -1.49 27.37
 -14 -3 1 25.84 24.28
 -14 -3 1 20.57 21.72
 14 -3 -1 23.34 21.88
 -14 3 2 -6.05 12.31
 -14 -3 -2 2.21 14.56
 -14 -3 -2 10.38 10.33
 14 -3 2 13.23 19.87
 -14 3 -2 3.11 16.36
 -14 -3 2 -4.32 13.37
 14 -3 -2 27.26 18.39
 -14 -3 2 12.69 19.96
 -14 -3 -3 3.76 13.41
 -14 -3 -3 -0.27 9.14
 14 -3 3 -5.58 19.83
 -14 3 3 -1.35 11.82
 -14 -3 3 4.19 13.05
 -14 3 -3 14.92 24.62
 -14 -3 3 4.88 12.13
 14 -3 -3 6.3 17.49
 -14 -3 -4 -4.57 14.36
 -14 -3 -4 1.85 8.94
 -14 3 4 10.26 11.86
 14 -3 4 -5.9 21.49
 -14 3 -4 -3.78 17.67
 -14 -3 4 11.95 14.16
 -14 -3 4 10.53 12.65
 14 -3 -4 18.28 28.22
 -14 -3 -5 8.35 8.55
 -14 -3 -5 10.02 14.99
 -14 3 5 -0.14 10.51
 14 -3 5 27.66 20.28
 -14 3 -5 3.89 19.06
 -14 -3 5 -3.22 19.06
 14 -3 -5 17.8 19.33
 -14 -3 5 0.52 15.46
 -14 3 6 3.76 9.45
 -14 -3 -6 10.51 15.53
 -14 -3 -6 -0.61 7.81
 14 -3 6 4.03 20.48
 -14 3 -6 8.3 19.36
 -14 -3 6 1.44 15.96
 -14 -3 6 12.06 12.51
 14 -3 -6 21.61 18.73
 -14 -3 -7 33.29 20.84
 -14 -3 -7 20.39 10.42
 14 -3 7 85.46 27.53
 -14 -3 7 46.54 21.72
 -14 3 -7 29.78 37.72
 -14 -3 7 49.4 16.09
 14 -3 -7 62.3 40.26
 -14 -3 -8 24.1 18.68
 14 -3 8 15.69 40.47
 -14 -3 8 18.34 19.92
 -14 3 -8 13.93 21.76
 -14 -3 8 13.32 13.48
 14 -3 -8 18.43 23.45
 -14 -3 -9 8.71 16.95
 14 -3 9 -21.13 23.65
 -14 -3 9 27.01 28.22
 -14 3 -9 11.61 20.66
 -14 -3 9 -3.42 18.66
 14 -3 -9 13.68 20.59
 -14 -3 -10 -5.33 18.43
 14 -3 10 24.15 24.06
 -14 -3 10 -17.42 32.41
 -14 3 -10 17.58 21.74
 -14 -3 10 7.92 12.47
 -14 -3 -11 -8.44 31.37
 14 -3 11 25.12 38.71
 -14 -3 11 0.5 21.25
 -14 3 -11 1.62 22.87
 -14 -3 11 10.51 12.22
 14 -3 12 3.89 27.21
 -14 -3 -12 8.37 22.15
 -14 -3 12 7.04 24.01
 -14 3 -12 33.65 25.21
 14 -3 13 3.15 28.29
 -14 -3 -13 15.42 23.36
 -14 3 -13 13.71 27.37
 -14 -3 13 18.79 24.71
 14 -3 14 20.19 22.6
 14 3 -14 0.09 1.44
 -14 -3 -14 -11.01 18.95
 -14 -3 14 -19.76 20.37
 -14 3 -14 -0.95 34.16
 14 -3 15 -12.92 47.94
 -14 -3 -15 46.39 40.78
 -14 -3 15 8.42 28.54
 -14 3 -15 44.36 45.35
 14 -3 16 -0.34 28.52
 -14 -3 -16 -1.58 22.35
 -14 3 -16 22.53 40.87
 -14 -3 16 21.25 40.22
 -14 -3 -17 14.29 25.59
 14 -3 17 9.09 32.54
 -14 -3 17 31.15 48.21
 -14 3 -17 30.43 49.2
 14 -3 18 -3.67 31.96
 -14 -3 -18 19.13 25.97
 -14 3 18 32.34 43.42
 -14 3 -18 22.84 31.51
 -14 -3 18 -1.55 30.77
 14 -3 19 19.04 32.25
 -14 3 19 19.15 28.2
 -14 -3 -19 10.11 41.32
 -14 3 -19 4.55 33.08
 -14 -3 19 1.71 31.96
 14 -3 20 6.46 30.68
 -14 3 20 8.67 27.44
 -14 -3 -20 7.99 25.59
 -14 -3 20 4.55 31.44
 -14 3 -20 7.31 32.75
 14 -3 21 24.1 49.42
 -14 -3 -21 -0.32 26.94
 -14 3 21 -5.13 47.89
 -14 -3 21 15.62 33.83
 -14 3 -21 21.56 35
 14 -3 22 -7.13 33.44
 -14 -3 -22 35.36 28.56
 -14 3 22 0.79 31.35
 -14 -3 22 1.55 35.56
 -14 3 -22 18.43 36.62
 14 -3 23 0.09 32.23
 -14 -3 -23 -16.88 28.2
 -14 3 23 2.07 31.87
 -14 3 -23 -32.14 57.44
 14 -3 24 -28.9 30.63
 -14 -3 -24 21.02 47.78
 -14 3 24 36.28 47.38
 -14 -3 24 -17.13 38.1
 -14 3 -24 7.29 56.78
 14 -3 25 17.65 29.93
 -14 -3 -25 -10.96 30.81
 -14 3 25 6.53 30.88
 -14 -3 25 -4.25 37.43
 -14 3 -25 12.51 57.23
 14 -3 26 24.24 30.09
 -14 -3 -26 20.91 31.35
 -14 3 26 -20.86 32.23
 -14 -3 26 -11.64 38.8
 -14 3 -26 -12.54 60.9
 14 -3 27 31.04 36.37
 -14 3 27 19.13 64.23
 -14 -3 27 25.93 47.62
 -14 3 -27 27.93 47.53
 -15 3 0 -1.49 17.49
 -15 -3 0 14.22 21.99
 -15 -3 0 5.36 12.65
 15 -3 0 35.38 32.63
 -15 -3 -1 14.97 13.59
 -15 -3 -1 3.31 11.32
 15 -3 1 -9.84 19.56
 -15 -3 1 -0.32 12.42
 -15 3 -1 25.91 23.74
 -15 -3 1 -7.25 14.02
 15 -3 -1 -0.65 18.28
 -15 -3 -2 10.31 11.48
 -15 3 2 -2.79 13.68
 -15 -3 -2 11.93 15.39
 15 -3 2 20.55 21.7
 -15 3 -2 -5.36 18.19
 -15 -3 2 13.75 14.83
 -15 -3 2 31.71 22.37
 15 -3 -2 -1.89 20.37
 -15 -3 -3 -0.83 13.8
 -15 -3 -3 0.25 9.5
 15 -3 3 28.11 32.03
 -15 3 3 -10.2 12.2
 -15 3 -3 9.77 26.54
 -15 -3 3 1.51 12.42
 -15 -3 3 5.24 20.84
 15 -3 -3 -18.1 27.73
 -15 -3 -4 29.66 27.35
 -15 -3 -4 13.93 11.57
 -15 3 4 3.13 14.94
 15 -3 4 27.39 25.97
 -15 3 -4 19.45 21.79
 -15 -3 4 27.75 22.91
 -15 -3 4 13.37 17.62
 15 -3 -4 36.87 23.23
 -15 -3 -5 2.59 16.05
 -15 -3 -5 -0.41 9.36
 15 -3 5 17.47 23.05
 -15 -3 5 7.99 16.02
 -15 3 -5 30.65 19.83
 -15 -3 5 -5.63 19.51
 15 -3 -5 2.23 20.73
 -15 -3 -6 14.99 17.31
 15 -3 6 9.5 38.44
 -15 3 -6 7.18 21.85
 -15 -3 6 3.47 18.07
 -15 -3 6 9.88 13.05
 15 -3 -6 1.73 33.49
 -15 -3 -7 -11.41 16.72
 15 -3 7 5.56 21.47
 -15 3 -7 -14.13 32.84
 -15 -3 7 6.46 17.49
 -15 -3 7 11.12 11.73
 15 -3 -7 5.63 20.84
 -15 -3 -8 3.6 16.2
 15 -3 8 7.72 20.91
 -15 -3 8 -4.88 17.1
 -15 -3 8 -1.28 10.44
 -15 3 -8 -11.41 18.88
 15 -3 -8 4.75 19.69
 15 -3 9 11.88 24.73
 -15 -3 9 11.46 21.29
 -15 3 -9 19.13 23.59
 -15 -3 9 14.04 20.26
 15 -3 -9 -5.06 27.23
 -15 -3 -10 12.94 22.1
 15 -3 10 15.26 42.02
 -15 3 -10 -6.12 25.12
 -15 -3 10 11.73 12.9
 -15 -3 10 32.84 33.35
 -15 -3 -11 14.65 19.31
 15 -3 11 -0.11 24.26
 -15 3 -11 -6.3 22.33
 -15 -3 11 -5.24 10.87
 -15 -3 11 0.36 30.95
 -15 -3 -12 -18.05 22.33
 15 -3 12 4.95 27.91
 -15 -3 12 -15.03 24.17
 -15 3 -12 3.76 25.36
 -15 -3 -13 9.5 25.39
 15 -3 13 11.39 31.58
 -15 -3 13 28.31 27.5
 -15 3 -13 22.57 29.53
 15 -3 14 18.66 47.65
 -15 -3 -14 -10.69 23.92
 -15 3 -14 35.61 45.44
 -15 -3 14 30.38 27.68
 15 -3 15 11.66 29.37
 -15 -3 -15 6.77 22.6
 -15 3 -15 10.33 44.34
 -15 -3 15 -4.43 26.54
 15 -3 16 22.53 34.01
 -15 -3 -16 3.04 26.36
 -15 -3 16 37.14 30.61
 -15 3 -16 6.14 49.99
 15 -3 17 -3.17 35.99
 -15 -3 -17 39.34 28.27
 -15 -3 17 25.54 49.51
 -15 3 -17 -9.09 53.34
 15 -3 18 22.35 34.57
 -15 3 18 6.41 30.23
 -15 -3 -18 10.87 43.55
 -15 -3 18 23 51.97
 -15 3 -18 25.88 53.59
 15 -3 19 -8.69 48.12
 -15 -3 -19 -2.79 24.19
 -15 3 19 0.43 26.27
 -15 -3 19 1.28 30.02
 -15 3 -19 -13.23 47.8
 15 -3 20 -1.33 33.15
 -15 -3 -20 -0.02 26.76
 -15 3 20 -1.08 28.92
 -15 -3 20 17.62 32.9
 -15 3 -20 37.68 51.16
 15 -3 21 -1.58 35.76
 -15 -3 -21 10.58 28.54
 -15 3 21 25.72 32.7
 -15 -3 21 12.4 35.81
 -15 3 -21 -9.66 57.62
 15 -3 22 16.11 35.56
 -15 3 22 4.93 33.62
 -15 -3 -22 4.03 30.2
 -15 -3 22 5.85 36.78
 -15 3 -22 56.56 59.66
 15 -3 23 5.78 34.1
 -15 -3 -23 -19.2 51.18
 -15 3 23 26.33 33.62
 -15 3 -23 46.81 61.22
 -15 -3 23 -5.78 37.88
 15 -3 24 -0.07 35
 -15 -3 -24 11.84 34.46
 -15 3 24 35.34 53.5
 -15 -3 24 15.33 65.13
 -15 3 -24 22.82 64.35
 15 -3 25 27.8 35.54
 -15 -3 -25 30.92 36.44
 -15 3 25 20.44 37.7
 -15 -3 25 -7.88 44.74
 -15 3 -25 2.59 72.31
 -16 -3 0 9.48 13.82
 -16 3 0 9.86 18.19
 -16 -3 0 -1.31 15.21
 16 -3 0 4.52 21.29
 -16 3 1 13.37 22.21
 -16 -3 -1 2.23 23.36
 -16 -3 -1 -2.61 12.6
 16 -3 1 18.28 31.44
 -16 3 -1 16.45 29.57
 -16 -3 1 -2.63 14.02
 -16 -3 1 11.86 13.93
 16 -3 -1 -4.43 20.28
 -16 -3 -2 12.36 27.12
 -16 -3 -2 20.48 14
 16 -3 2 29.91 25.21
 -16 3 -2 8.42 21.13
 -16 -3 2 10.94 15.87
 -16 -3 2 12.63 16.56
 16 -3 -2 45.85 37.56
 -16 -3 -3 -4.14 15.44
 -16 -3 -3 0.52 11.25
 16 -3 3 -0.18 22.06
 -16 3 -3 17.85 18.66
 -16 -3 3 -2.14 20.1
 -16 -3 3 8.42 23.77
 16 -3 -3 9.59 20.89
 -16 -3 -4 6.46 16.83
 -16 -3 -4 10.06 12.04
 16 -3 4 -4.01 23.36
 -16 -3 4 7.63 21.65
 -16 -3 4 5.29 26
 -16 3 -4 25.5 31.76
 16 -3 -4 -7.36 22.01
 -16 -3 -5 2.52 17.96
 16 -3 5 21.36 26.49
 -16 -3 5 14.85 18.95
 -16 3 -5 1.76 22.98
 -16 -3 5 10.96 14.2
 16 -3 -5 42.31 37.07
 -16 -3 -6 -5.9 27.46
 16 -3 6 4.07 24.69
 -16 -3 6 -0.88 18.1
 -16 -3 6 -6.03 12.65
 -16 3 -6 -5.06 22.33
 16 -3 -6 -5.04 21.88
 -16 -3 -7 12.47 32.32
 16 -3 7 22.15 26.81
 -16 -3 7 22.01 20.37
 -16 3 -7 -21.43 39.79
 -16 -3 7 3.98 13.23
 16 -3 -7 16.09 24.73
 -16 -3 -8 1.82 21.38
 16 -3 8 -2.7 43.57
 -16 -3 8 8.57 20.08
 -16 -3 8 10.26 21.88
 -16 3 -8 11.23 38.17
 16 -3 -8 31.26 24.82
 -16 -3 -9 0.23 21.18
 16 -3 9 18.07 25.54
 -16 -3 9 1.55 21.34
 -16 -3 9 5.45 19.85
 -16 3 -9 10.06 24.6
 -16 -3 -10 14.88 21.56
 16 -3 10 0.32 26.36
 -16 -3 10 2 22.35
 -16 3 -10 3.94 25.41
 -16 -3 -11 2.9 21.88
 16 -3 11 12.58 25.95
 -16 -3 11 -0.32 34.14
 -16 3 -11 -1.13 25.41
 -16 -3 -12 3.8 30.7
 16 -3 12 20.98 39.61
 -16 -3 12 11.59 36.01
 -16 3 -12 -13.5 25.45
 16 -3 13 -22.12 29.69
 -16 -3 -13 13.68 22.12
 -16 3 -13 11.23 27.91
 -16 -3 13 -26.78 25.23
 16 -3 14 9.57 33.13
 -16 -3 -14 5.58 24.51
 -16 -3 14 17.29 28.81
 -16 3 -14 18.82 31.6
 16 -3 15 11.48 29.53
 -16 -3 -15 -4.23 22.08
 -16 -3 15 0.47 25.81
 -16 3 -15 2.09 28
 16 -3 16 32.48 37.27
 -16 -3 -16 13.68 28.81
 -16 3 -16 24.58 56.31
 -16 -3 16 13.12 32.84
 -16 -3 -17 12.78 42.94
 16 -3 17 22.87 57.28
 -16 -3 17 20.93 33.26
 -16 3 -17 -6.64 56.54
 16 -3 18 -7.13 35.65
 -16 3 18 -18.86 29.24
 -16 -3 -18 -5.18 26.42
 -16 -3 18 18.57 49.51
 -16 3 -18 -11.03 52.8
 16 -3 19 -10.35 38.71
 -16 3 19 23.45 31.98
 -16 -3 -19 24.28 28.85
 -16 -3 19 -5.33 36.3
 -16 3 -19 39.97 58.02
 16 -3 20 13.08 34.98
 -16 -3 -20 3.71 27.59
 -16 3 20 11.37 30.45
 -16 -3 20 -0.99 34.48
 -16 3 -20 7.9 56.18
 16 -3 21 5.9 36.91
 -16 -3 -21 3.11 45.22
 -16 3 21 2.93 33.87
 -16 3 -21 -27.59 58.65
 -16 -3 21 34.23 36.46
 16 -3 22 32.63 34.43
 -16 -3 -22 12.51 31.13
 -16 3 22 -4.19 33.17
 -16 3 -22 -18.46 60.2
 -16 -3 22 -12.78 35.58
 16 -3 23 19.51 36.39
 -16 -3 -23 -14.2 33.17
 -16 3 23 19.51 35.2
 -16 -3 23 7.94 38.78
 -16 3 -23 29.89 63.76
 -17 -3 0 6.93 14.43
 -17 -3 0 -8.1 15.06
 17 -3 0 26.63 22.26
 -17 -3 -1 -1.8 15.93
 -17 -3 -1 -3.85 13.75
 17 -3 1 19.09 22.78
 -17 3 -1 20.82 33.47
 -17 -3 1 -1.24 14.72
 -17 -3 1 14.7 15.01
 17 -3 -1 16.09 35.52
 -17 -3 -2 1.28 16.81
 -17 -3 -2 4.91 14.56
 17 -3 2 7.7 22.96
 -17 3 -2 -6.14 19.54
 -17 -3 2 -2.68 22.12
 -17 -3 2 15.71 16.38
 17 -3 -2 12.6 23.5
 -17 -3 -3 5.06 16.02
 17 -3 3 -1.67 35.76
 -17 3 -3 -5.22 19.51
 -17 -3 3 3.83 12.92
 -17 -3 3 4.32 24.55
 17 -3 -3 -5.4 22.03
 17 -3 4 7.94 27.48
 -17 -3 4 -5.85 30.29
 -17 3 -4 13.1 36.24
 -17 -3 4 18.77 14.43
 17 -3 -4 9.86 40.94
 -17 -3 -5 0.16 18.79
 17 -3 5 16.65 23.95
 -17 -3 5 -11.16 12.54
 -17 -3 5 8.55 27.64
 -17 3 -5 9.07 21.56
 17 -3 -5 -19.09 22.87
 -17 -3 -6 12.78 19.04
 17 -3 6 19.87 37.16
 -17 -3 6 -2.09 12.36
 -17 3 -6 5.54 23
 17 -3 -6 -24.06 22.75
 -17 -3 6 15.08 18.55
 -17 -3 -7 0.38 21.94
 17 -3 7 35.11 28.56
 -17 3 -7 24.08 26.78
 -17 -3 7 6.55 21.27
 17 -3 -7 -12.11 26.56
 -17 -3 -8 10.98 23.79
 17 -3 8 52.87 30.99
 -17 -3 8 -2.21 23.74
 -17 3 -8 7.02 42.13
 -17 -3 -9 4.75 22.35
 17 -3 9 -2.9 28.2
 -17 -3 9 7.11 22.15
 -17 3 -9 8.26 25.66
 -17 -3 -10 16.79 33.49
 17 -3 10 -24.76 45.31
 -17 -3 10 4.1 23.47
 -17 3 -10 9.25 26.96
 -17 -3 -11 3.92 20.98
 17 -3 11 -13.8 26.69
 -17 -3 11 7.2 22.84
 -17 3 -11 6.48 26.47
 -17 -3 -12 -3.38 20.46
 17 -3 12 -9.14 26.15
 -17 -3 12 1.53 37.68
 -17 3 -12 11.43 25.7
 -17 -3 -13 9.05 23.38
 17 -3 13 15.89 29.8
 -17 -3 13 -9.99 27.84
 -17 3 -13 2.09 28.74
 -17 -3 -14 3.62 25.36
 17 -3 14 23.68 32.36
 -17 3 -14 18.1 33.2
 -17 -3 14 -5.72 30.16
 -17 -3 -15 7.11 37.81
 17 -3 15 -33.04 49.81
 -17 -3 15 -0.43 29.62
 -17 3 -15 23.95 32.23
 17 -3 16 26 36.42
 -17 -3 -16 2.68 26.06
 -17 -3 16 1.53 32.32
 -17 3 -16 14.54 35.29
 17 -3 17 14.54 33.22
 -17 -3 -17 -7.02 23.99
 -17 3 17 27.8 42.56
 -17 -3 17 -14.81 29.1
 -17 3 -17 -4.57 31.82
 17 -3 18 16.99 42.99
 -17 3 18 36.71 35.4
 -17 -3 -18 22.24 31.51
 -17 -3 18 -1.44 60.07
 -17 3 -18 15.03 64.91
 17 -3 19 19.76 40.71
 -17 -3 -19 15.73 30.79
 -17 3 19 2.52 33.49
 -17 -3 19 -0.7 59.6
 -17 3 -19 59.66 63.33
 17 -3 20 19 35.52
 -17 -3 -20 -5.22 42.42
 -17 3 20 -4.12 46.86
 -17 3 -20 -42.99 55.5
 -17 -3 20 14.31 33.87
 17 -3 21 44.59 62.41
 -17 -3 -21 26.4 33.06
 -17 3 21 16.38 36.19
 -17 -3 21 -10.44 38.98
 -17 3 -21 -26.81 63.83
 -18 -3 0 5 25.32
 -18 -3 0 12.9 17.4
 18 -3 0 -6.98 25.18
 -18 -3 -1 -0.27 26.27
 18 -3 1 -3.15 24.13
 -18 -3 1 7.67 15.96
 -18 -3 1 4.12 14.74
 18 -3 -1 -0.65 24.58
 -18 -3 -2 1.42 18.05
 18 -3 2 2.93 23.88
 -18 -3 2 -2.39 14.27
 -18 -3 2 -6.14 16.56
 18 -3 -2 -14.56 24.53
 -18 -3 -3 9.84 19.87
 18 -3 3 4.61 25.54
 -18 -3 3 5.6 14.61
 18 -3 -3 29.51 40.78
 -18 -3 3 -3.87 28.16
 -18 -3 -4 8.01 21.52
 18 -3 4 20.17 42.49
 -18 3 -4 10.53 40.69
 -18 -3 4 9.72 31.4
 -18 -3 4 5.4 15.91
 18 -3 -4 38.31 28
 -18 -3 -5 7.9 21.45
 18 -3 5 7.22 27.1
 -18 -3 5 17.67 30.63
 -18 3 -5 8.67 23.72
 18 -3 -5 -9.39 26.76
 -18 -3 -6 3.49 20.59
 18 -3 6 1.8 25.57
 -18 3 -6 -0.83 24.19
 -18 -3 6 7.25 19.54
 18 -3 -6 -4.88 25.07
 -18 -3 -7 29.78 33.17
 18 -3 7 -12.18 26.81
 -18 -3 7 9.95 21.04
 -18 3 -7 -8.62 25.7
 -18 -3 -8 -6.44 21.2
 18 -3 8 8.46 43.08
 -18 -3 8 -4.01 22.28
 -18 3 -8 -4.28 26.24
 -18 -3 -9 19.56 22.64
 18 -3 9 -12.49 30.56
 -18 -3 9 3.78 23.88
 -18 3 -9 2.66 43.33
 -18 -3 -10 20.84 22.33
 18 -3 10 -12.85 30.59
 -18 -3 10 2.34 24.51
 -18 3 -10 -7.65 27.95
 -18 -3 -11 25.7 25.32
 -18 -3 11 -4.84 27.32
 -18 3 -11 7.9 32.07
 -18 -3 -12 2.68 22.57
 18 -3 12 -17.42 30.23
 -18 -3 12 -29.62 38.26
 -18 3 -12 33.24 28.61
 -18 -3 -13 20.53 34.89
 -18 -3 13 -20.57 27.03
 -18 3 -13 6.75 29.44
 -18 -3 -14 16.59 27.08
 18 -3 14 18.84 36.6
 -18 -3 14 7.67 34.05
 -18 3 -14 12.31 36.12
 -18 -3 -15 9.12 28.34
 18 -3 15 18.61 37.5
 -18 -3 15 17.35 34.37
 -18 3 -15 11.12 37.14
 -18 -3 -16 13.41 28.25
 18 -3 16 19.15 36.21
 -18 -3 16 4.03 35.07
 -18 3 -16 0.2 37.47
 -18 -3 -17 4.46 26.58
 -18 3 17 -12.85 31.51
 18 -3 17 24.04 33.92
 -18 -3 17 3.58 33.24
 -18 3 -17 12.83 36.19
 -18 3 18 -0.72 28.43
 -18 -3 -18 9.9 39.03
 18 -3 18 7.74 32.21
 -18 -3 18 -25.03 30.92
 -18 3 -18 11.37 33.33
 18 -3 19 -14.36 68.15
 -18 -3 -19 24.01 34.77
 -18 3 19 27.71 36.48
 -18 3 -19 18.39 43.24
 -18 -3 19 9.7 64.03
 -19 -3 0 3.65 15.98
 19 -3 0 -3.33 25.59
 -19 -3 -1 -3.76 16.54
 19 -3 1 13.71 24.4
 -19 -3 1 6.14 15.75
 19 -3 -1 -15.19 24.67
 -19 -3 -2 10.96 16.79
 19 -3 2 14.25 37.92
 19 -3 -2 -30.27 24.49
 -19 -3 -3 14.81 31.35
 19 -3 3 2.77 27.37
 -19 -3 3 6.46 30.68
 19 -3 -3 6.66 28.52
 -19 -3 -4 -11.07 31.1
 19 -3 4 3.08 28.76
 -19 -3 4 32.52 32.32
 19 -3 -4 12.31 28.43
 -19 -3 -5 8.62 20.46
 19 -3 5 3.13 27.93
 -19 -3 5 -8.12 32.99
 19 -3 -5 15.35 27.84
 -19 -3 -6 -0.92 21.45
 19 -3 6 29.93 44.83
 -19 -3 6 12.04 22.53
 -19 -3 -7 4.95 21.4
 19 -3 7 5.31 29.73
 -19 3 -7 2.25 28
 -19 -3 7 5.9 22.69
 -19 -3 -8 6.98 22.37
 19 -3 8 -7.4 29.78
 -19 -3 8 -0.09 22.91
 -19 3 -8 16.23 28.22
 -19 -3 -9 12.09 26.13
 19 -3 9 30.18 33.78
 -19 3 -9 9.97 32.81
 -19 -3 9 7.52 26.54
 -19 -3 -10 10.47 40.31
 19 -3 10 -2.66 33.87
 -19 -3 10 22.33 26.87
 -19 3 -10 -0.38 47.78
 -19 -3 -11 1.78 24.22
 19 -3 11 16.07 53.34
 -19 -3 11 8.24 26.87
 -19 3 -11 5.22 30.43
 -19 -3 -12 7.65 26.96
 19 -3 12 24.98 37.74
 -19 -3 12 34.25 47.62
 -19 3 -12 2.88 34.03
 -19 -3 -13 -2.99 27.32
 19 -3 13 18.52 37.56
 -19 -3 13 33.8 32.36
 -19 3 -13 3.51 34.39
 -19 -3 -14 0.97 23.99
 19 -3 14 24.33 32.5
 -19 -3 14 -7.36 28.29
 -19 3 -14 -20.66 30.81
 -19 -3 -15 11.59 26.69
 19 -3 15 16.16 36.62
 -19 -3 15 2.12 32.61
 -19 3 -15 -8.57 34.89
 -19 -3 -16 7.7 44.41
 -19 3 16 4.91 53.07
 19 -3 16 34.98 60.66
 -19 -3 16 28.63 35.18
 -19 3 -16 -18.21 38.4
 20 -3 0 26.29 55.61
 20 -3 1 19.38 33.13
 20 -3 -1 11.03 32.99
 -20 -3 -2 -4.66 18.43
 20 -3 2 21.16 28.27
 20 -3 -2 11.73 29.3
 -20 -3 -3 7.67 19.24
 20 -3 3 32.3 31.53
 20 -3 -3 -7.4 31.44
 -20 -3 -4 -2.99 19.56
 20 -3 4 12.92 45.24
 20 -3 -4 -24.76 30.38
 -20 -3 -5 14.25 20.39
 20 -3 5 19.38 30.25
 -20 -3 5 -8.35 23.88
 -20 -3 -6 -15.98 20.17
 20 -3 6 14.79 28.9
 -20 -3 6 -0.34 21.56
 -20 -3 -7 -12.92 35.85
 20 -3 7 16.9 31.46
 -20 -3 7 17.53 24.33
 -20 -3 -8 4.01 23.56
 20 -3 8 39.86 32.3
 -20 -3 8 6.05 25.81
 -20 -3 -9 8.15 24.62
 20 -3 9 33.78 54.04
 -20 -3 9 14.54 26.9
 -20 -3 -10 15.39 25.68
 20 -3 10 41.16 35.9
 -20 -3 10 -8.76 28.92
 -20 3 -10 30.14 37.45
 -20 -3 -11 10.4 26.54
 20 -3 11 21.81 35.34
 -20 3 -11 -36.84 54.33
 -20 -3 11 36.44 43.87
 -20 -3 -12 -9.09 27.71
 20 -3 12 14.13 35.76
 -20 -3 12 48.7 49.96
 -20 3 -12 61.83 52.69
 21 -3 0 14.25 34.41
 21 -3 1 19.51 31.37
 21 -3 -1 -8.1 31.4
 21 -3 2 4.28 49.22
 21 -3 -2 10.76 32.66
 21 -3 3 8.55 28.4
 21 -3 -3 -8.64 33.06
 21 -3 4 15.33 33.78
 -21 -3 -5 -14.85 22.98
 21 -3 5 -15.03 34.66
 -21 -3 -6 3.83 19.9
 21 -3 6 20.91 49.31
 0 -4 0 253.56 22.62
 0 -4 -1 451.73 29.98
 0 -4 1 505.63 47.15
 0 4 1 502.59 31.85
 0 -4 -2 6.1 8.35
 0 4 2 0.95 1.55
 0 4 -2 2.41 1.73
 0 4 2 10.35 13.41
 0 -4 2 -1.58 9.93
 0 -4 3 108.62 19.6
 0 4 3 117.87 15.75
 0 -4 -3 107.2 14.16
 0 -4 4 125.95 20.14
 0 -4 -4 87.73 13.23
 0 4 4 108.1 14.63
 0 -4 -5 104.52 12.81
 0 -4 5 106.61 19.69
 0 4 -5 115.86 24.64
 0 4 6 46.12 11.3
 0 -4 6 31.31 16.92
 0 4 -6 40.92 31.82
 0 -4 -6 53.32 10.06
 0 4 7 36.26 10.31
 0 -4 7 33.98 16.97
 0 4 -7 28.16 20.44
 0 -4 -7 45.42 9.07
 0 4 8 3.49 12.13
 0 -4 8 12.65 14.4
 0 4 -8 7.63 17.04
 0 -4 -8 10.8 7.49
 0 4 9 15.19 8.6
 0 -4 9 27.77 15.98
 0 4 -9 4.19 19.27
 0 -4 -9 20.91 11.82
 0 4 10 8.82 8.46
 0 -4 10 21.49 22.46
 0 -4 -10 20.66 11.48
 0 4 -10 5.87 19.56
 0 4 11 12.92 15.24
 0 -4 11 22.46 16
 0 -4 -11 16.86 11.28
 0 4 -11 13.75 20.48
 0 4 -12 11.95 32.3
 0 4 12 20.5 10.38
 0 -4 -12 39.97 12.99
 0 -4 -12 -1.31 8.35
 0 -4 12 40.08 17.06
 0 4 -13 69.19 27.75
 0 4 13 55.12 12.65
 0 -4 13 66.87 21.97
 0 -4 -13 72.45 17.35
 0 4 -14 28.99 25.36
 0 4 14 26.67 18.48
 0 -4 14 41.34 21.29
 0 -4 -14 48.68 15.26
 0 4 -15 69.66 27.59
 0 4 15 46.5 13.21
 0 -4 15 3.31 22.46
 0 -4 -15 58.18 25.81
 0 4 15 47.35 9.81
 0 4 -16 53.63 35.47
 0 -4 16 32.5 31.01
 0 -4 -16 9.23 13.64
 0 4 16 4.48 12.58
 0 4 -17 12.67 19.51
 0 -4 17 2.68 19.27
 0 -4 -17 0.92 12.72
 0 4 17 4.97 12.04
 0 4 18 12.56 8.98
 0 4 -18 33.4 22.78
 0 -4 18 -2.36 22.98
 0 -4 -18 18.52 14.97
 0 4 -19 24.13 22.75
 0 -4 19 -1.15 23.14
 0 -4 -19 9.61 13.93
 0 4 19 11.57 9.3
 0 4 -20 94.78 35.92
 0 -4 20 133.01 35.25
 0 -4 -20 81.43 21.61
 0 4 20 76.27 23.02
 0 4 -21 23.68 27.77
 0 -4 21 10.67 26.94
 0 -4 -21 16.43 15.87
 0 4 21 24.8 10.74
 0 4 22 25.91 17.31
 0 4 -22 14.65 28.45
 0 -4 -22 12.29 16.36
 0 -4 22 15.35 27.75
 0 4 -23 54.08 32.21
 0 -4 23 34.3 30.18
 0 -4 -23 36.93 29.44
 0 4 23 20.21 12.85
 0 4 -24 -3.96 29.21
 0 -4 24 13.73 28.04
 0 -4 -24 16.56 17.87
 0 4 24 11.93 19.36
 0 4 -25 22.69 48.28
 0 -4 25 20.03 29.1
 0 -4 -25 17.26 28.29
 0 4 25 7.58 13.03
 0 4 -26 16.07 47.71
 0 -4 26 0.72 29.06
 0 -4 -26 7.27 17.13
 0 4 -27 -21.58 56.29
 0 -4 -27 23.25 19.6
 0 -4 27 13.26 33.87
 0 4 -28 22.17 49.65
 0 -4 -28 -7.76 16.54
 0 -4 28 7.67 29.48
 0 4 -29 5.67 48.91
 0 -4 29 9.45 28.25
 0 -4 -29 -3.38 16.02
 0 4 -30 38.44 70.81
 0 -4 30 -0.32 65.18
 0 -4 -30 37.63 36.19
 0 4 -31 56.49 58.92
 0 -4 -31 -15.98 20.66
 0 -4 31 22.51 54.08
 0 4 -32 17.89 45.82
 0 -4 -32 15.64 23.11
 0 -4 32 28.63 62.34
 0 -4 -33 3.04 20.08
 0 4 -33 -3.44 40.76
 0 -4 33 17.26 36.37
 0 4 -34 10.74 41.23
 0 -4 34 -0.47 36.15
 1 -4 0 7.02 8.67
 1 4 0 -1.87 2.16
 -1 -4 0 -0.77 7.97
 -1 4 0 1.67 1.55
 1 4 0 -0.29 7.65
 1 -4 1 7.31 11.86
 -1 -4 -1 22.71 9.41
 -1 -4 1 26.29 17.38
 1 -4 -1 27.59 11.68
 1 4 1 12.02 15.71
 1 -4 2 3.53 9.5
 -1 4 2 1.51 2.25
 1 4 -2 -0.7 1.35
 -1 -4 -2 12.09 6.75
 1 -4 -2 2.52 7.7
 1 4 2 -0.95 1.55
 -1 -4 2 3.67 8.8
 -1 4 -2 0.59 1.49
 1 4 2 0.9 7.34
 -1 -4 -3 674.39 39.66
 1 -4 3 673.37 51.2
 1 -4 -3 669.73 51.25
 -1 -4 3 650.15 46.7
 1 4 3 710.58 39.81
 -1 4 -3 650.82 55.32
 -1 -4 -4 463.86 26.96
 1 -4 4 469.33 56.02
 1 -4 -4 473.31 40.69
 -1 4 -4 454.05 45.85
 -1 -4 4 485.65 38.31
 1 4 4 472.03 30.09
 -1 -4 -5 16.07 7.13
 1 -4 5 21.74 13.93
 -1 4 5 -0.38 15.15
 1 -4 -5 5.51 13.71
 1 4 5 10.22 8.53
 -1 -4 5 -1.17 12.54
 -1 4 -5 19.45 16.59
 -1 4 6 93.83 14.76
 1 -4 6 96.33 21.76
 1 4 -6 97.3 24.89
 -1 -4 -6 102.74 16.09
 -1 -4 6 64.03 19.6
 -1 4 -6 99.95 25.57
 1 4 6 75.69 12.02
 1 -4 -6 107.58 13.35
 -1 4 7 258.98 22.33
 1 -4 7 283.42 33.6
 1 4 -7 268.84 37.72
 -1 -4 -7 293.8 17.42
 1 4 7 301.2 27.1
 -1 -4 7 244.47 42.78
 -1 4 -7 291.77 59.19
 1 -4 -7 299.38 20.82
 -1 4 8 -0.97 1.67
 -1 4 8 -9.88 11.48
 1 -4 8 11.46 11.97
 1 4 -8 15.1 21.36
 -1 -4 -8 -1.37 5.31
 1 4 8 5.04 6.1
 1 4 8 0.92 2.23
 -1 -4 8 -7.13 10.53
 -1 4 -8 3.26 14.7
 1 -4 -8 4.5 6.91
 -1 4 9 34.57 11.59
 1 -4 9 12.11 18.75
 1 4 -9 40.42 21.83
 -1 -4 -9 51.79 11.19
 1 4 9 38.15 9
 -1 -4 9 32.25 16.61
 -1 4 -9 49.15 22.3
 1 -4 -9 38.85 10.2
 1 -4 10 27.1 19.81
 1 4 -10 58.88 21.56
 -1 -4 -10 25.61 6.86
 -1 4 -10 22.33 22.35
 1 4 10 29.19 12.63
 -1 -4 10 24.33 17.04
 1 -4 -10 42.67 9.3
 -1 -4 -11 43.35 7.67
 1 4 -11 43.6 24.73
 1 -4 11 32.97 21.99
 -1 4 -11 53.95 25.23
 1 4 11 45.71 14.13
 1 -4 -11 54.02 10.44
 -1 -4 11 60.25 30.29
 1 -4 12 13.28 17.24
 -1 -4 -12 5.54 12.69
 1 4 -12 4.28 19.27
 -1 4 -12 8.37 19.54
 1 4 12 10.51 7.36
 -1 -4 12 10.04 15.87
 1 -4 -12 5.09 7.81
 1 -4 13 66.44 24.96
 -1 -4 -13 67.83 17.92
 1 4 -13 73.42 28.72
 -1 4 -13 62.5 43.15
 1 4 13 74.77 12.72
 -1 -4 13 64.57 23.99
 1 -4 -13 68.73 17.42
 1 -4 14 25.21 25.54
 -1 -4 -14 10.17 12.67
 1 4 -14 0.95 29.66
 1 4 14 3.94 11.55
 1 4 14 0.68 5.49
 -1 4 -14 42.72 18.12
 -1 -4 14 8.17 16.32
 1 -4 -14 0.32 11.34
 1 4 -15 25.59 22.78
 1 -4 15 24.46 19.04
 -1 -4 -15 25.54 13.86
 1 4 15 8.71 9.16
 -1 4 -15 30.16 20.53
 -1 -4 15 23.92 19.83
 1 -4 -15 12.22 13.89
 1 4 15 15.17 7.11
 1 4 -16 -6.46 20.66
 1 -4 16 13.75 16.74
 -1 -4 -16 4.32 13.03
 -1 4 16 5.51 8.42
 1 4 16 4.43 8.24
 -1 4 -16 7.38 19.47
 1 4 16 2.25 6.01
 -1 -4 16 1.01 18.86
 1 -4 -16 7.49 11.57
 1 4 -17 8.03 22.3
 1 -4 17 14.97 19.67
 -1 -4 -17 8.53 13.82
 -1 4 17 7.52 14.27
 1 4 17 5.33 9.23
 -1 4 -17 6.21 20.95
 -1 -4 17 -1.08 20.03
 1 -4 -17 10.83 19.56
 1 4 -18 14.43 23.86
 -1 4 18 8.64 9.61
 1 -4 18 -12.24 20.3
 -1 -4 -18 16.63 14.45
 1 4 18 2.03 9.57
 -1 4 -18 24.67 21.76
 -1 -4 18 8.3 20.86
 1 -4 -18 28.56 12.65
 1 4 18 0.18 7.31
 1 4 -19 31.26 32.12
 -1 4 19 41.05 12.94
 1 -4 19 64.44 27.41
 -1 -4 -19 49.83 18.75
 -1 4 -19 32.66 45.06
 1 4 19 36.1 10.06
 -1 -4 19 30.5 28.58
 1 -4 -19 55.55 16.2
 1 4 -20 21.52 29.69
 1 -4 20 6.62 18.82
 -1 -4 -20 -5.58 12.72
 -1 4 20 -2.57 13.62
 -1 -4 20 8.94 19.47
 1 -4 -20 -3.58 11.01
 1 4 20 3.06 10.51
 1 4 -21 27.01 27.84
 -1 -4 -21 25.63 17.01
 -1 4 21 12.92 13.12
 1 -4 21 25.36 26.49
 -1 4 -21 46.5 50.73
 -1 -4 21 10.78 27.89
 1 4 21 23.05 10.02
 1 -4 -21 23.56 15.28
 1 4 -22 23.14 26.99
 -1 -4 -22 11.34 17.04
 1 -4 22 20.5 26.22
 -1 4 22 3.51 18.97
 1 4 22 19.72 10.4
 -1 4 -22 23.61 32.9
 -1 -4 22 4.43 27.39
 1 -4 -22 10.71 14.97
 1 4 -23 26.09 30.54
 1 -4 23 28.09 29.1
 -1 -4 -23 15.6 30.83
 -1 4 23 26 13.55
 -1 -4 23 17.6 29.44
 -1 4 -23 64.95 35.92
 1 -4 -23 20.01 17.8
 1 4 23 11.16 17.96
 1 4 -24 28.04 26
 1 -4 24 23.41 24.76
 -1 -4 -24 17.51 16.95
 -1 4 24 -2 11.88
 -1 4 -24 -7.61 31.64
 -1 -4 24 11.05 26.6
 1 -4 -24 12.78 14.92
 1 4 24 -7 10.51
 1 4 -25 9.59 29.64
 -1 -4 -25 7.94 18.77
 1 -4 25 10.83 27.46
 -1 4 25 0.18 13.37
 -1 4 -25 42.87 35.38
 1 -4 -25 22.15 23.86
 -1 -4 25 7.81 29.26
 1 4 -26 16.14 26.74
 -1 4 26 6.5 12.47
 -1 -4 -26 -4.88 15.78
 1 -4 26 5.83 23.81
 -1 4 -26 6.17 32
 1 -4 -26 -11.16 13.86
 -1 -4 26 -7.25 25.32
 1 4 -27 37.88 35.16
 -1 -4 -27 0.59 20.46
 1 -4 27 42.51 31.44
 -1 4 27 14.09 15.73
 -1 -4 27 -7.99 33.58
 -1 4 -27 52.89 41.25
 1 -4 -27 2.54 28.31
 -1 -4 -28 -2.5 26.11
 1 4 -28 18.61 30.23
 1 -4 28 -16.83 26.99
 1 -4 -28 -9.61 15.08
 -1 4 -28 35.54 35.76
 -1 -4 28 21.94 28.02
 -1 -4 -29 1.87 18.75
 1 4 -29 17.83 34.43
 1 -4 29 -14.92 30.52
 -1 4 -29 19.36 40.96
 -1 -4 29 16.47 32.63
 1 -4 -29 3.62 16.9
 1 4 -30 10.15 35.2
 -1 -4 -30 3.22 18.86
 1 -4 30 -8.42 30.77
 1 -4 -30 -10.26 18.05
 -1 4 -30 8.78 41.75
 -1 -4 30 -3.24 32.75
 1 4 -31 4.12 41.95
 -1 -4 -31 13.91 23.25
 1 -4 31 12.42 36.26
 -1 -4 31 6.3 36.93
 1 -4 -31 3.2 20.44
 -1 4 -31 50.62 47.87
 1 4 -32 9.3 40.98
 -1 -4 -32 -15.73 22.71
 1 -4 32 -17.26 35.7
 1 -4 -32 39.07 30.47
 -1 4 -32 55.19 47.98
 -1 -4 32 16.99 37.79
 1 4 -33 -7.49 44.65
 -1 -4 -33 24.71 38.94
 1 -4 33 36.46 40.22
 -1 4 -33 2.32 80.73
 -1 -4 33 2.88 42.6
 1 4 -34 18.64 50.05
 1 -4 34 22.08 44.88
 -1 4 -34 -16.54 91.53
 -1 -4 34 51.2 47.58
 2 4 0 2.57 7.04
 2 -4 0 18.43 10.33
 2 4 0 -0.36 1.55
 -2 -4 0 0.29 8.01
 -2 4 0 -1.4 2.09
 -2 -4 -1 174.83 19.67
 2 -4 1 222.3 25
 2 4 -1 139.56 19.38
 -2 -4 1 211.25 30.05
 2 4 1 164.82 18.64
 2 -4 -1 234.41 31.82
 2 -4 2 18.57 20.08
 -2 -4 -2 26.69 8.69
 2 -4 -2 23.99 11.55
 -2 4 -2 6.17 16.11
 -2 -4 2 11.46 11.46
 2 4 2 25.09 9.12
 -2 -4 -3 32.93 9
 2 -4 3 30.9 15.26
 2 -4 -3 53.07 12.38
 -2 4 -3 57.05 18.21
 -2 -4 3 34.05 13.55
 2 4 3 27.39 9.5
 -2 -4 -4 6.41 10.94
 2 -4 4 11.46 19.96
 2 -4 -4 14.76 9.52
 -2 -4 4 8.69 11.23
 2 4 4 -2.7 10.94
 -2 4 -4 8.55 14.97
 -2 -4 -5 77.87 9.72
 2 -4 5 77.6 21.07
 -2 -4 5 71.44 17.56
 2 4 5 76.59 11.95
 -2 4 -5 82.58 24.31
 2 -4 -5 100.92 14.47
 -2 -4 -6 18.68 6.55
 2 -4 6 16.74 23.79
 -2 -4 6 21.88 12.72
 2 4 6 11.3 7.52
 -2 4 -6 30.77 18.55
 2 -4 -6 31.04 9.97
 2 -4 7 90.86 23.56
 -2 -4 -7 94.84 13.3
 -2 -4 7 72.02 29.46
 2 4 7 88.5 15.84
 -2 4 -7 116.34 27.37
 2 -4 -7 121.4 22.57
 2 -4 8 2.45 12.72
 -2 4 8 -0.88 1.49
 2 4 -8 2.95 13.84
 -2 -4 -8 8.62 4.52
 -2 4 -8 -8.21 23.45
 -2 -4 8 -0.23 10.65
 2 4 8 -0.81 1.8
 2 4 8 0.41 5.6
 2 -4 -8 -3.53 12.22
 -2 4 9 1.4 1.62
 2 -4 9 4.3 21.04
 2 4 -9 6.41 14.85
 -2 -4 -9 -1.01 3.89
 -2 4 -9 7.88 15.44
 2 4 9 1.17 5.31
 -2 -4 9 -4.64 12
 2 4 9 -0.7 1.91
 2 -4 -9 9.88 7.65
 2 4 -10 59.08 36.17
 -2 -4 -10 59.48 9.99
 2 -4 10 33.53 22.62
 -2 4 -10 46.77 26.15
 2 4 10 58.43 8.85
 -2 -4 10 39.16 20.05
 2 -4 -10 57.59 11.91
 2 -4 11 36.12 19.09
 2 4 -11 14.34 19.94
 -2 -4 -11 25.79 14.22
 -2 4 -11 30.32 32.25
 2 4 11 10.56 10.13
 -2 -4 11 20.53 16.34
 2 -4 -11 17.53 10.47
 2 -4 12 32.57 24.71
 2 4 -12 58.7 25.59
 -2 -4 -12 68.96 18.48
 -2 4 -12 59.17 25.23
 2 4 12 44.65 12.63
 -2 -4 12 61.58 30.09
 2 -4 -12 67.99 12.9
 2 -4 13 30.63 25.88
 -2 -4 -13 11.14 12.09
 2 4 -13 4.61 27.53
 -2 4 -13 -7.97 16.95
 2 4 13 2.32 8.37
 -2 -4 13 0.52 14.29
 2 -4 -13 -0.25 10.83
 2 4 13 2.45 4.3
 2 -4 14 12 19.11
 -2 -4 -14 8.15 20.41
 2 4 -14 22.44 19.96
 -2 -4 14 11.82 15.57
 -2 4 -14 8.37 18.16
 2 4 14 1.82 6.01
 2 -4 -14 0.95 17.38
 2 4 14 5.9 7.22
 2 -4 15 15.15 20.64
 -2 -4 -15 21.13 13.5
 2 4 -15 10.31 20.8
 2 4 15 5.47 7.4
 -2 4 -15 7.76 20.46
 -2 -4 15 -2.23 17.13
 2 -4 -15 14.79 12.11
 2 4 15 6.44 7.92
 2 -4 16 4.19 18.75
 -2 -4 -16 0.52 19.81
 2 4 -16 0.02 19.87
 2 4 16 -2.95 6.59
 -2 -4 16 1.13 15.51
 2 -4 -16 5.63 10.69
 2 4 16 8.21 7.67
 2 -4 17 5.4 20.84
 -2 -4 -17 7.79 14.72
 2 4 -17 15.96 33.56
 -2 4 17 1.67 9.81
 2 4 17 7.16 11.41
 -2 4 -17 14.81 36.37
 -2 -4 17 11.07 17.89
 2 -4 -17 21.79 17.62
 2 4 17 2.32 5.4
 2 4 -18 9.05 22.62
 -2 -4 -18 24.87 24.22
 -2 4 18 0.5 17.38
 2 -4 18 25.25 22.62
 -2 4 -18 12.11 26.09
 -2 -4 18 15.84 20.21
 2 -4 -18 18.84 12.31
 2 4 18 2.97 6.08
 2 4 -19 5.65 22.82
 2 -4 19 14.81 22.6
 -2 -4 -19 2.9 14.45
 -2 4 19 3.85 11.03
 -2 4 -19 21.76 25.7
 -2 -4 19 15.3 19.63
 2 -4 -19 -5.18 11.1
 2 4 19 6.71 10.06
 2 4 -20 36.28 26.15
 2 -4 20 -0.72 39.52
 -2 -4 -20 21.4 16.36
 -2 4 20 10.29 12.06
 -2 4 -20 32.75 29.21
 -2 -4 20 21.18 22.75
 2 -4 -20 2.09 12.87
 2 4 20 11.57 7.81
 2 4 -21 43.1 31.37
 2 -4 21 77.49 42.99
 -2 -4 -21 32.34 19.27
 -2 4 21 29.17 14.61
 -2 4 -21 62.97 35.2
 -2 -4 21 24.44 28.13
 2 -4 -21 42.02 14.99
 2 4 21 15.17 10.02
 2 4 -22 -2.32 29.19
 2 -4 22 32.68 39.48
 -2 4 22 9.41 13.84
 -2 -4 -22 11.73 17.4
 -2 4 -22 10.74 33.04
 2 -4 -22 20.71 13.73
 -2 -4 22 -5.13 25.41
 2 4 22 11.59 13.77
 2 4 -23 1.51 30.68
 2 -4 23 11.23 27.73
 -2 -4 -23 24.26 30.38
 -2 4 23 3.87 22.51
 -2 4 -23 23.47 35.61
 2 -4 -23 15.08 15.44
 -2 -4 23 20.44 27.64
 2 4 -24 10.96 30.79
 2 -4 24 6.53 25.48
 -2 -4 -24 5.13 18.41
 -2 4 24 6.19 13.32
 -2 4 -24 -8.94 33.71
 2 -4 -24 3.4 14.88
 -2 -4 24 25.81 26.49
 2 4 -25 37.77 29.06
 -2 4 25 -1.13 19.65
 2 -4 25 -22.91 24.46
 -2 -4 -25 7.29 17.53
 -2 4 -25 -22.46 31.62
 2 -4 -25 -0.83 13.32
 -2 -4 25 18.41 24.96
 2 4 -26 43.89 53.34
 -2 -4 -26 -3.26 19.15
 -2 4 26 3.26 14.72
 2 -4 26 8.85 27.91
 -2 4 -26 -0.63 36.66
 2 -4 -26 17.67 15.44
 -2 -4 26 6.59 28.47
 2 4 -27 55.75 49.76
 -2 -4 -27 2.5 17.71
 2 -4 27 -2.39 25.88
 -2 4 27 -1.42 13.59
 2 -4 -27 -5.31 13.73
 -2 4 -27 -3.67 34.34
 -2 -4 27 -2.81 26.15
 2 4 -28 24.28 55.34
 -2 -4 -28 5.54 29.39
 -2 4 28 7.38 15.87
 2 -4 28 6.41 28.09
 -2 4 -28 29.12 38.69
 -2 -4 28 11.1 29.64
 2 -4 -28 -9.81 15.01
 -2 -4 -29 5.72 22.42
 2 -4 29 2.95 54.02
 2 4 -29 51.36 60.11
 2 -4 -29 34.32 29.75
 -2 4 -29 16.81 45.04
 -2 -4 29 2.79 35.58
 2 4 -30 5.85 59.35
 -2 -4 -30 30.02 21.45
 2 -4 30 3.38 52.6
 -2 -4 30 10.6 54.22
 2 -4 -30 -0.86 18.43
 -2 4 -30 -26.2 44.54
 2 4 -31 33.22 81.27
 -2 -4 -31 21.09 43.93
 2 -4 31 40.33 68.92
 -2 -4 31 49.92 69.07
 -2 4 -31 17.62 54.69
 2 4 -32 -5.13 63.9
 -2 -4 -32 -5.9 21.65
 2 -4 32 17.31 55.23
 -2 4 -32 35.63 42.99
 -2 -4 32 -7.11 34.71
 2 4 -33 -41.93 65.76
 -2 -4 -33 -2.14 21.79
 2 -4 33 -1.46 36.33
 -2 4 -33 3.8 44.38
 -2 -4 33 26.6 36.24
 3 -4 0 17.67 9.27
 3 4 0 -0.83 1.62
 -3 4 0 1.6 1.46
 3 4 0 -9.43 10.26
 -3 -4 0 0.09 7.45
 3 -4 1 3.31 10.98
 3 4 -1 1.55 2.36
 -3 -4 -1 0.97 7.16
 -3 4 1 1.58 2.14
 3 4 -1 1.55 10.11
 3 -4 -1 4.61 9.57
 3 4 1 -2.14 6.03
 -3 -4 1 5.15 12.51
 3 4 1 -1.26 2.5
 -3 4 -1 3.42 12.13
 3 -4 2 21.61 13.68
 -3 -4 -2 12.31 8.39
 3 -4 -2 21.67 11.95
 -3 -4 2 23.38 11.03
 -3 4 -2 25.77 15.84
 3 4 2 20.41 7.63
 3 -4 3 3.17 15.08
 -3 -4 -3 30.45 7.9
 3 -4 -3 30.11 11.97
 -3 -4 3 12.51 11.37
 3 4 3 18.37 10.74
 -3 4 -3 32.3 17.83
 -3 -4 -4 167.02 21.43
 3 -4 4 253.6 30.02
 3 -4 -4 292.88 33.35
 -3 -4 4 201.73 23.97
 3 4 4 168.24 14.81
 -3 4 -4 259.05 48.79
 -3 -4 -5 71.17 8.6
 3 -4 5 44.99 20.39
 -3 -4 5 64.17 16.36
 3 4 5 61.4 12.09
 -3 4 -5 75.01 23.86
 -3 -4 -6 61.78 11.66
 3 -4 6 83.41 22.1
 -3 -4 6 63.45 17.56
 3 4 6 54.83 8.24
 -3 4 -6 68.46 24.37
 3 -4 -6 84.96 14.11
 3 -4 7 18.16 18.41
 -3 -4 -7 23.7 8.48
 -3 4 -7 15.44 20.46
 -3 -4 7 21.22 14.25
 3 4 7 26.54 8.73
 3 -4 8 36.03 26.09
 -3 -4 -8 8.44 7.49
 -3 4 -8 9.41 19.18
 -3 -4 8 16.9 19.72
 3 4 8 14.22 7.61
 3 -4 -8 20.32 10.33
 3 -4 9 38.96 16.88
 -3 -4 -9 12.58 5.54
 -3 4 -9 -1.17 19.51
 -3 -4 9 13.28 13.32
 3 4 9 7.79 5.02
 3 -4 -9 -4.37 15.73
 3 -4 10 5.27 18.52
 3 4 -10 34.46 18.7
 -3 -4 -10 2.95 14.02
 -3 -4 -10 7.74 4.23
 -3 4 -10 28.94 17.83
 3 4 10 15.53 4.97
 -3 -4 10 22.98 14.52
 3 -4 -10 26.81 10.11
 3 -4 11 7.11 17.31
 3 4 -11 -0.72 16.36
 -3 -4 -11 -7.58 12.36
 -3 4 -11 17.22 16.29
 3 4 11 1.62 4.37
 -3 -4 11 11.57 13.26
 3 -4 -11 5.54 9.18
 3 -4 12 20.73 32.88
 3 4 -12 17.53 32.54
 -3 -4 -12 34.8 15.46
 -3 4 -12 24.04 21.7
 3 4 12 23.41 5.45
 -3 -4 12 22.42 17.42
 3 4 12 23.7 3.94
 3 -4 -12 40.35 12.13
 3 -4 13 24.64 19.96
 -3 -4 -13 1.85 14.22
 3 4 -13 12.27 20.17
 -3 4 -13 31.4 29.78
 3 4 13 11.5 4.91
 -3 -4 13 12.29 16.45
 3 4 13 9.75 5.2
 3 -4 -13 15.75 12.11
 3 -4 -13 10.35 12.63
 3 -4 14 15.15 18.55
 -3 -4 -14 4.34 12.22
 3 4 -14 -2.95 18.12
 3 4 14 3.53 4.21
 -3 4 -14 22.73 32.68
 -3 -4 14 -8.87 23.72
 -3 -4 14 2.57 24.06
 3 -4 -14 2.77 16.41
 3 4 14 2.57 4.75
 3 -4 15 -4.39 19.47
 -3 -4 -15 15.08 12.9
 3 4 -15 21.47 18.41
 3 4 15 1.94 4.23
 -3 4 -15 20.95 21.79
 -3 -4 15 10.2 24.31
 3 4 15 0.65 3.38
 -3 -4 15 20.93 24.82
 3 -4 -15 4.41 10.4
 3 -4 16 -0.54 22.62
 -3 -4 -16 35.76 15.12
 3 4 -16 20.01 35
 3 4 16 6.12 5.45
 -3 4 -16 27.86 25
 -3 -4 16 22.6 19.36
 3 -4 -16 26.87 11.48
 3 4 16 10.04 4.5
 3 -4 17 9.59 34.73
 -3 -4 -17 15.39 16.32
 3 4 -17 18.91 23.11
 -3 4 -17 23.41 26.31
 3 4 17 5.54 7.34
 3 -4 -17 19.87 17.96
 -3 -4 17 20.71 20.03
 3 -4 18 -9.7 21.63
 -3 -4 -18 20.01 23.18
 -3 4 18 8.46 11.37
 3 4 -18 8.01 22.39
 -3 4 -18 0.59 25.93
 -3 -4 18 -0.52 19.94
 3 -4 -18 1.71 10.94
 3 4 18 6.28 7.72
 -3 -4 -19 27.53 16.41
 3 -4 19 19.27 24.42
 -3 4 19 15.35 20.46
 3 4 -19 -2.16 24.69
 -3 -4 19 -5.67 22.66
 -3 4 -19 22.03 28.18
 3 4 19 7.61 6.28
 3 -4 -19 9.88 11.52
 3 -4 20 50.3 28.34
 -3 -4 -20 22.03 29.03
 -3 4 20 14.4 15.62
 3 4 -20 53.86 29.01
 3 4 20 8.53 11.91
 -3 4 -20 41.68 33.06
 -3 -4 20 44.09 26.81
 3 -4 -20 24.49 13.37
 -3 4 21 10.29 11.64
 -3 -4 -21 12.45 14.88
 3 -4 21 -24.82 22.66
 3 4 -21 13.93 36.44
 -3 4 -21 31.87 26.02
 -3 -4 21 0.25 21.04
 3 -4 -21 -12.78 10.56
 -3 4 22 19.02 14.83
 3 4 -22 22.93 44.09
 3 -4 22 5.69 28.11
 -3 -4 -22 4.57 18.46
 3 -4 -22 10.08 20.17
 -3 4 -22 18.91 33.85
 -3 -4 22 21.76 26.51
 3 4 -23 -15.91 26.38
 -3 -4 -23 -20.19 27.66
 -3 4 23 16.99 13.64
 3 -4 23 3.08 25.81
 -3 4 -23 38.15 47.58
 3 -4 -23 -5.51 12.63
 -3 -4 23 21.85 36.51
 3 4 -24 0.92 28.16
 3 -4 24 3.69 26.38
 -3 -4 -24 11.5 18.82
 -3 4 24 6.86 14.72
 -3 4 -24 35.88 51.16
 3 -4 -24 -26.04 20.98
 -3 -4 24 15.57 39.99
 -3 -4 24 18.66 39.57
 3 4 -25 10.04 33.35
 3 -4 25 21.74 31.04
 -3 -4 -25 26.04 21.81
 -3 4 25 9.32 16.07
 -3 4 -25 -6.71 58.54
 3 -4 -25 6.19 14.4
 -3 -4 25 13.14 29.71
 3 4 -26 20.8 32.93
 3 -4 26 9.99 30.61
 -3 -4 -26 -0.11 20.14
 -3 4 26 1.13 16.09
 -3 4 -26 -24.69 58.18
 3 -4 -26 10.94 22.55
 -3 -4 26 28.88 29.53
 -3 4 27 -4.14 17.56
 3 4 -27 32.21 36.62
 -3 -4 -27 5.9 21.79
 3 -4 27 0.54 33.71
 -3 4 -27 28.13 63.2
 3 -4 -27 21.9 14.92
 -3 -4 27 2.68 31.96
 3 4 -28 7.67 35.9
 3 -4 28 11.37 32.36
 -3 -4 -28 6.75 32.59
 -3 4 28 4.82 16.99
 -3 4 -28 6.59 63.18
 -3 -4 28 4.82 30.92
 3 -4 -28 1.82 22.66
 3 4 -29 39.12 42.72
 3 -4 29 7.72 37.79
 -3 -4 -29 27.35 23.09
 -3 4 29 -7.83 31.67
 -3 4 -29 -8.28 73.03
 -3 -4 29 5.22 35.72
 3 4 -30 8.89 38.17
 -3 -4 -30 -7.31 20.77
 3 -4 30 -10.38 33.49
 -3 -4 30 0.74 31.78
 -3 4 -30 43.73 64.77
 3 4 -31 -10.17 42.27
 3 -4 31 -23.99 38.06
 -3 -4 -31 -38.87 38.22
 -3 4 -31 10.4 46.9
 -3 -4 31 30.45 35.22
 3 4 -32 25.5 47.56
 -3 -4 -32 20.68 26.96
 3 -4 32 11.28 41.66
 -3 4 -32 38.58 53.3
 -3 -4 32 -15.84 40.87
 3 4 -33 -4.37 42
 -3 -4 -33 8.01 23.43
 3 -4 33 -27.55 37.47
 -3 4 -33 37.65 46.99
 -3 -4 33 1.42 35.16
 4 4 0 25.34 9.48
 4 -4 0 44.27 14.56
 -4 -4 0 30.25 10.31
 -4 4 0 13.64 16.54
 4 -4 1 71.93 17.01
 -4 -4 -1 46.95 11.07
 4 4 -1 45.8 17.78
 4 -4 -1 79.09 16.47
 -4 4 -1 76.39 19.18
 4 4 1 43.12 10.35
 -4 -4 1 44.61 11.95
 4 -4 2 11.07 13.05
 4 4 -2 1.6 1.85
 -4 -4 -2 8.73 6.5
 4 4 -2 1.62 12.24
 4 4 2 4.19 6.03
 4 -4 -2 7.47 15.53
 -4 -4 2 -1.4 8.12
 -4 4 -2 5.6 13.08
 4 -4 3 5.06 12.78
 4 4 -3 -1.19 1.69
 -4 -4 -3 -1.67 5.67
 -4 4 3 1.91 1.35
 4 -4 -3 -9.52 10.02
 -4 -4 3 7.4 8.73
 4 4 3 1.96 1.89
 -4 4 -3 -2.3 20.48
 4 4 3 2.41 5.15
 -4 -4 -4 -7.56 8.33
 4 -4 4 11.03 13.41
 4 4 4 12.63 8.06
 -4 -4 4 10.92 10.08
 -4 4 -4 0.09 15.6
 4 -4 -4 7.4 11.12
 -4 -4 -5 64.08 9.07
 4 -4 5 88.36 21.22
 -4 -4 5 79.29 24.58
 4 4 5 84.76 16.7
 -4 4 -5 89.24 37.7
 4 -4 -5 101.32 15.93
 -4 -4 -6 2.43 3.83
 -4 4 6 1.4 1.31
 4 -4 6 -0.45 13.08
 4 4 -6 -0.36 1.73
 -4 4 -6 15.01 14.45
 4 4 6 1.76 1.98
 -4 -4 6 -2.68 9.84
 4 4 6 -0.2 8.28
 4 -4 -6 19.4 14.22
 4 -4 7 43.35 19.69
 -4 -4 -7 33.17 8.21
 -4 4 -7 54.92 22.82
 4 4 7 49.94 7.27
 -4 -4 7 23.77 15.46
 4 -4 -7 46.5 14.36
 4 -4 8 11.41 16.9
 -4 -4 -8 8.44 2.95
 -4 4 -8 8.15 24.76
 -4 -4 8 1.96 12.6
 4 4 8 14.61 4.66
 4 -4 -8 14.94 10.89
 4 -4 9 3.87 17.1
 -4 -4 -9 6.95 2.16
 -4 4 -9 3.06 16.88
 -4 -4 9 -2.21 13.1
 4 4 9 8.57 3.53
 4 -4 -9 24.08 15.73
 4 -4 10 23.18 20.17
 -4 -4 -10 20.71 15.66
 -4 4 -10 10.69 20.12
 -4 -4 10 16.2 15.84
 4 4 10 20.5 3.11
 4 -4 -10 29.42 11.88
 4 -4 11 19.49 32.14
 -4 -4 -11 38.69 22.82
 -4 4 -11 20.75 29.8
 -4 -4 11 9.86 15.96
 4 -4 -11 13.64 11.91
 4 -4 12 8.26 19.18
 4 4 -12 8.15 17.94
 -4 -4 -12 -11.16 13.53
 -4 4 -12 33.69 32.36
 -4 -4 12 1.98 14.72
 4 -4 -12 16.5 11.01
 4 -4 13 13.28 20.66
 4 4 -13 10.26 18.48
 -4 -4 -13 1.19 21.18
 -4 4 -13 -1.91 21.99
 -4 -4 13 9.77 15.89
 4 -4 -13 7.11 11.86
 4 -4 14 28.27 20.95
 4 4 -14 12.99 19.18
 -4 -4 -14 6.19 14.25
 -4 4 -14 7.74 23.05
 -4 -4 14 -3.89 17.17
 4 -4 -14 4.16 10.53
 4 -4 15 6.28 32.41
 -4 -4 -15 8.08 22.24
 4 4 -15 22.53 29.91
 -4 -4 15 10.89 16.92
 -4 4 -15 -3.53 24.04
 4 -4 -15 1.55 10.2
 4 -4 16 5.63 21.9
 -4 -4 -16 11.55 15.55
 4 4 -16 1.82 21.07
 -4 4 -16 25.25 25.97
 -4 -4 16 -8.08 18.73
 4 -4 -16 9.03 10.15
 4 -4 17 22.75 29.15
 -4 -4 -17 51.63 21.11
 4 4 -17 28.27 28.18
 -4 4 -17 60.14 34.21
 4 -4 -17 41.05 20.95
 -4 -4 17 50.21 25.45
 -4 4 18 35.02 21.65
 4 -4 18 20.71 24.51
 -4 -4 -18 6.5 17.13
 4 4 -18 19.72 23.83
 -4 4 -18 63.72 45.49
 -4 -4 18 8.33 22.55
 4 -4 -18 5.78 11.55
 4 -4 19 -7.7 26.56
 -4 4 19 13.1 14.52
 -4 -4 -19 15.66 18.37
 4 4 -19 58.83 38.73
 -4 -4 19 45.42 22.62
 -4 4 -19 54.26 42.18
 4 -4 -19 2.39 11.32
 -4 -4 -20 15.8 28.38
 4 -4 20 15.44 26.4
 -4 4 20 7.88 15.35
 4 4 -20 -1.31 40.78
 -4 -4 20 -5.22 23.27
 -4 4 -20 0.61 28.7
 4 -4 -20 32.68 17.31
 4 -4 21 -2.81 23.72
 -4 -4 -21 -4.79 16.95
 -4 4 21 -4.73 13.82
 4 4 -21 12.42 23.23
 -4 -4 21 1.44 22.96
 -4 4 -21 -6.66 25.43
 4 -4 -21 -5 10.24
 4 -4 22 -9.25 23.56
 -4 4 22 3.62 13.48
 -4 -4 -22 2.27 16.56
 4 4 -22 -17.15 23.72
 4 -4 -22 0.38 16.86
 -4 -4 22 3.92 22.8
 -4 4 -22 -6.53 25.7
 4 -4 23 17.69 29.78
 -4 -4 -23 44.18 21.72
 -4 4 23 11.84 16.45
 4 4 -23 -1.89 29.98
 -4 -4 23 21.65 27.8
 4 -4 -23 5.83 13.53
 -4 4 -23 -19.58 32.48
 4 -4 24 -2.03 24.6
 -4 -4 -24 -10.4 17.87
 -4 4 24 16.05 14.52
 4 4 -24 0.07 25.79
 4 -4 -24 -5.38 10.94
 -4 -4 24 -17.1 24.15
 -4 4 -24 19.13 27.19
 4 -4 25 -28.94 42.51
 -4 -4 -25 -22.96 19.87
 -4 4 25 5.67 16.25
 4 4 -25 2 28.88
 4 -4 -25 13.3 11.88
 -4 -4 25 -1.98 26.92
 -4 4 -25 -6.46 30.32
 -4 4 26 13.64 18.25
 4 -4 26 31.4 50.98
 -4 -4 -26 9.25 22.3
 4 4 -26 0.2 34.59
 -4 -4 26 1.33 32.45
 -4 4 -26 3.85 36.17
 4 -4 -26 13.21 13.64
 -4 -4 -27 30.16 22.87
 -4 4 27 -1.17 18.93
 4 4 -27 0.79 36.17
 4 -4 27 33.4 51.29
 -4 -4 27 10.8 33.94
 -4 4 -27 2.57 37.07
 4 -4 28 -17.51 50.95
 -4 -4 -28 4.21 35.18
 -4 4 28 25.61 28.9
 4 4 -28 7.81 35.76
 -4 -4 28 -14.63 32.88
 -4 4 -28 13.73 36.98
 -4 -4 -29 -15.87 21.9
 4 -4 29 3.78 51.86
 -4 4 29 1.15 18.61
 4 4 -29 -5.78 37.83
 -4 -4 29 30.77 49.83
 -4 4 -29 -14.11 38.44
 -4 4 30 13.08 27.62
 -4 -4 -30 -2.88 21.43
 4 -4 30 -9.61 50.73
 4 4 -30 -5.99 36.6
 -4 -4 30 3.38 49.54
 -4 -4 30 -15.33 49.45
 -4 4 -30 14.49 36.89
 -4 -4 -31 40.87 39.48
 4 -4 31 4.68 41.43
 4 4 -31 33.2 47.62
 -4 -4 31 10.42 40.11
 -4 4 -31 -19.65 46.79
 -4 -4 -32 -13.14 27.57
 4 -4 32 -7.09 39.77
 4 4 -32 -11.37 46.14
 -4 -4 32 5.94 38.91
 -4 4 -32 -23.86 69.73
 -4 -4 -33 8.71 26.31
 4 -4 33 9.75 38.46
 4 4 -33 3.35 45.73
 -4 -4 33 -7.81 38.94
 -4 4 -33 27.28 70.36
 5 -4 0 -1.6 11.82
 -5 -4 0 4.32 6.84
 5 4 0 2.84 6.64
 -5 4 0 2.39 11.95
 5 4 0 1.33 2.7
 5 -4 1 29.98 16.2
 -5 -4 -1 38.1 14.81
 5 4 -1 38.37 10.26
 -5 4 1 43.84 16.61
 5 -4 -1 46.75 23.68
 5 4 1 33.62 8.62
 -5 -4 1 36.1 10.92
 -5 4 -1 46.43 18.23
 5 -4 2 -5.33 11.66
 5 4 -2 -0.79 2.48
 -5 -4 -2 -1.6 9.25
 -5 4 2 0.56 1.44
 5 -4 -2 10.42 10.71
 -5 -4 2 17.31 8.08
 5 4 2 0.79 2.7
 5 4 2 3.47 5.13
 -5 4 -2 10.53 20.03
 5 -4 3 14.85 16.38
 -5 -4 -3 11.73 6.55
 -5 -4 3 12.94 9.66
 5 4 3 8.62 8.69
 -5 4 -3 17.22 16.52
 5 -4 -3 0.5 12.72
 5 -4 4 20.86 16.38
 -5 -4 -4 14.2 5.74
 -5 -4 4 3.2 10.24
 5 4 4 5.96 7.45
 -5 4 -4 27.44 26.31
 5 -4 -4 38.58 19.69
 -5 -4 -5 9.5 4.48
 5 -4 5 5.74 15.12
 -5 4 -5 15.26 16.47
 -5 -4 5 13.46 17.04
 5 4 5 9.39 3.98
 5 -4 -5 9.07 11.55
 -5 -4 -6 4.16 5.13
 5 -4 6 12.42 14.4
 -5 4 6 2.5 1.46
 5 4 -6 0.02 2.77
 -5 4 -6 10.22 15.84
 5 4 6 2.72 3.15
 -5 -4 6 0.77 10.47
 5 4 6 3.17 4.32
 5 -4 -6 4.37 11.28
 5 -4 7 63.31 28.92
 -5 -4 -7 21.16 5.11
 -5 4 -7 40.08 18.01
 -5 -4 7 27.3 14.34
 5 -4 -7 18.43 14.22
 5 -4 8 14.63 18.68
 -5 4 -8 35.2 18.66
 -5 -4 8 22.03 14.4
 5 -4 -8 12.76 12.63
 5 -4 9 -9.43 14.94
 -5 4 9 -0.59 1.4
 -5 -4 -9 -3.29 12.06
 -5 4 -9 7.85 14.7
 -5 -4 9 5.94 11.68
 5 -4 -9 -1.64 9.5
 5 -4 10 -0.7 28.09
 -5 -4 -10 54.31 22.06
 -5 -4 10 1.82 21.45
 5 -4 -10 1.62 11.3
 5 -4 11 16.5 17.83
 -5 4 11 1.98 2.27
 -5 -4 -11 8.06 13.28
 -5 4 -11 13.91 20.03
 -5 -4 11 9.23 12.83
 5 -4 -11 -5.81 10.78
 5 -4 12 5.9 18.84
 -5 4 12 2.63 2.61
 -5 -4 -12 1.98 13.59
 -5 4 -12 34.05 20.12
 -5 -4 12 5.69 13.53
 5 -4 -12 2.81 11.25
 5 -4 13 63.81 25.61
 -5 -4 -13 26.6 18.19
 -5 4 -13 45.62 29.53
 -5 -4 13 36.08 19.92
 5 -4 -13 44.07 16.41
 5 -4 14 45.71 32.14
 -5 -4 -14 12.87 15.08
 -5 4 -14 22.93 23.27
 -5 -4 14 6.91 16.99
 5 -4 -14 -1.33 10.49
 5 -4 15 32.86 22.71
 5 4 -15 19.24 21.2
 -5 -4 -15 14.02 16.07
 -5 4 -15 1.64 39.14
 -5 -4 15 4.73 17.74
 5 -4 -15 2.14 9.79
 5 -4 16 4.41 23.56
 5 4 -16 18.93 21.49
 -5 -4 -16 6.62 16.7
 -5 4 -16 1.42 36.98
 -5 -4 16 11.16 18.52
 5 -4 -16 9.86 9.86
 5 -4 17 22.03 27.23
 5 4 -17 9.3 25.61
 -5 -4 -17 41.39 28.83
 -5 4 -17 14.4 28.76
 -5 -4 17 44.27 22.15
 5 -4 -17 21.63 17.49
 5 -4 18 21.25 25.27
 5 4 -18 4.86 35.72
 -5 -4 -18 0.2 17.49
 -5 4 -18 1.06 26.4
 -5 -4 18 12.99 21.47
 5 -4 -18 12.42 10.26
 5 -4 19 26.13 26.69
 -5 -4 -19 6.66 18.86
 5 4 -19 21.74 25.43
 -5 4 19 20.62 15.96
 -5 4 -19 29.21 28.34
 -5 -4 19 7 22.48
 5 -4 -19 5.85 10.42
 5 -4 20 28.43 41.91
 -5 -4 -20 -2.79 18.68
 5 4 -20 16.34 25.18
 -5 4 20 4.91 15.3
 5 -4 -20 9.52 9.9
 -5 4 -20 27.35 29.19
 -5 -4 20 19.6 23.11
 -5 -4 -21 18.52 20.37
 5 4 -21 6.91 26.87
 -5 4 21 7.54 17.65
 5 -4 21 11.5 43.57
 -5 4 -21 -1.15 29.78
 -5 -4 21 20.3 24.67
 5 -4 -21 16.88 16.95
 -5 4 22 12.56 16.54
 -5 -4 -22 -4.3 30.09
 5 -4 22 19.83 26.94
 5 4 -22 4.25 25.18
 5 -4 -22 -1.37 11.43
 -5 4 -22 23.88 29.89
 -5 -4 22 25.18 37.95
 5 -4 23 -7.18 29.89
 -5 -4 -23 8.6 22.89
 5 4 -23 25.54 27.5
 -5 4 23 12.02 18.1
 5 -4 -23 16.97 17.94
 -5 4 -23 -4.93 31.89
 -5 -4 23 5.33 42.56
 -5 4 24 4.84 18.43
 5 -4 24 25.52 31.4
 -5 -4 -24 -5.9 23.81
 5 4 -24 45.17 46.05
 5 -4 -24 19.65 12.06
 -5 -4 24 -20.98 47.11
 -5 4 -24 3.85 33.24
 5 -4 25 4.43 32.3
 -5 -4 -25 24.73 37.95
 5 4 -25 13.53 47.35
 -5 4 25 5.56 19.18
 -5 -4 25 8.3 31.87
 -5 4 -25 27.71 34.71
 5 -4 26 22.87 32.18
 -5 -4 -26 11.82 22.28
 -5 4 26 2.99 20.14
 5 4 -26 29.03 49.65
 -5 -4 26 -20.01 31.78
 -5 4 -26 22.78 35.36
 5 -4 27 25.14 32.12
 -5 -4 -27 -3.08 22.51
 -5 4 27 6.98 18.97
 5 4 -27 5.04 32.41
 -5 4 -27 12.67 35.54
 -5 -4 27 -14.81 32.16
 5 -4 28 5.94 35.81
 -5 4 28 9.54 20.71
 -5 -4 -28 -8.28 38.98
 5 4 -28 2.14 36.28
 -5 -4 28 27.28 35.29
 -5 4 -28 26.69 40.13
 -5 -4 -29 -16.09 22.21
 -5 4 29 10.78 29.33
 5 -4 29 -14.7 33.15
 5 4 -29 25.39 34.07
 -5 -4 29 -5.96 32.57
 -5 4 -29 7.99 37.07
 -5 -4 -30 23.43 25.21
 5 -4 30 7.72 38.51
 -5 4 30 -8.55 21.72
 5 4 -30 -1.1 40.76
 -5 -4 30 11.95 37.88
 -5 4 -30 41.55 42.6
 -5 -4 -31 12.33 33.44
 5 -4 31 -6.84 34.46
 -5 4 31 1.13 18.82
 5 4 -31 9.81 36.19
 -5 -4 31 -20.41 33.62
 -5 4 -31 -3.58 37.65
 -5 -4 -32 37.18 30.27
 5 -4 32 -3.33 44.05
 5 4 -32 0.45 46.32
 -5 -4 32 10.42 42.92
 -5 4 -32 9.03 49.45
 5 -4 33 -0.65 47.06
 -5 -4 33 87.93 71.82
 -5 -4 33 43.17 73.26
 -5 4 -33 12.92 50.84
 6 -4 0 15.39 22.42
 -6 -4 0 10.47 8.55
 6 4 0 14.31 7.29
 -6 4 0 13.48 14.81
 6 -4 1 3.89 12.22
 -6 -4 -1 5.02 9.93
 6 4 -1 1.19 1.82
 6 4 -1 6.35 6.75
 -6 4 1 4.66 11.93
 6 -4 -1 5.94 11.82
 6 4 1 -0.86 1.82
 -6 -4 1 -0.16 7.18
 6 4 1 7.38 5.49
 -6 4 -1 4.57 19.83
 6 -4 2 18.66 19.72
 -6 -4 -2 0.92 5.74
 -6 4 2 13.28 17.76
 6 4 -2 1.1 1.71
 6 4 2 0.9 1.82
 -6 -4 2 12.11 12.4
 6 4 2 4.77 7.88
 -6 4 -2 3.6 13.55
 6 -4 -2 -4.7 12.06
 6 -4 3 -2.66 12.65
 -6 4 3 -1.06 1.35
 -6 -4 -3 8.24 8.1
 6 4 -3 -0.34 1.64
 6 4 3 0.18 2.68
 -6 -4 3 -7.74 8.48
 6 4 3 4.48 4.37
 -6 4 -3 -0.07 22.08
 6 -4 -3 -2.03 11.43
 6 -4 4 27.46 25.79
 -6 -4 -4 19.09 5.96
 -6 4 -4 11.55 17.89
 6 4 4 12.94 6.98
 6 -4 -4 21.67 13.53
 -6 -4 4 18.97 11.61
 6 -4 5 7.49 17.47
 -6 -4 -5 11.66 6.08
 -6 4 -5 20.93 16.43
 -6 -4 5 23.38 16.7
 6 4 5 3.33 5.24
 6 4 5 4.77 3.35
 6 -4 -5 23.43 18.46
 -6 -4 -6 11.86 5.15
 6 -4 6 26.27 18.59
 -6 4 -6 16.56 16.23
 -6 -4 6 7.65 11.84
 6 4 6 9.63 2.16
 6 -4 -6 18.32 13.5
 6 -4 7 21.83 20.77
 -6 4 -7 23.86 19.85
 -6 -4 7 41.12 14.79
 6 -4 -7 37.9 14.94
 6 -4 8 18.16 18.88
 -6 -4 -8 14.76 15.39
 -6 4 -8 11.46 18.28
 -6 -4 8 9.27 13.62
 6 -4 -8 22.03 13.23
 6 -4 9 15.19 19.06
 -6 -4 -9 14.47 25.36
 -6 4 -9 39.39 33.49
 -6 -4 9 18.93 14.45
 6 -4 -9 10.42 12.9
 6 -4 10 -3.06 16.5
 -6 4 10 0.63 1.96
 -6 -4 -10 23.95 12.96
 -6 4 -10 -6.62 19
 -6 -4 10 2.99 12.36
 6 -4 -10 10.89 16.95
 6 -4 11 18.95 19.47
 -6 -4 -11 24.51 15.73
 -6 4 -11 7.43 22.53
 -6 -4 11 2.7 15.15
 6 -4 -11 2.12 13.39
 6 -4 12 -14.27 20.95
 -6 -4 -12 20.95 15.98
 -6 4 -12 9.23 23.88
 -6 -4 12 22.39 16.27
 6 -4 -12 20.55 14.25
 -6 -4 -13 11.41 16.25
 6 -4 13 18.95 34.05
 -6 4 -13 14.94 37.88
 -6 -4 13 4.46 16.95
 6 -4 -13 13.26 14.47
 6 -4 14 -1.69 20.68
 -6 -4 -14 23.16 23.02
 -6 4 -14 -18.66 20.75
 -6 -4 14 -1.87 16.23
 6 -4 -14 7.85 9
 6 -4 15 -9.97 22.44
 -6 -4 -15 -3.96 16.32
 -6 -4 15 7.34 18.25
 -6 4 -15 -2.54 22.73
 6 -4 -15 -11.59 9.27
 6 -4 16 0.14 23.63
 -6 -4 -16 -2.16 17.96
 -6 4 -16 21.13 24.58
 -6 -4 16 6.12 19.15
 6 -4 -16 12.99 9.14
 6 -4 17 -3.94 24.85
 -6 -4 -17 20.01 17.56
 -6 4 -17 -2.75 25.72
 -6 -4 17 17.8 20.3
 6 -4 -17 11.23 9.3
 6 -4 18 34.46 47.78
 6 4 -18 29.66 28.4
 -6 -4 -18 25.41 21.85
 -6 4 -18 54.92 32.25
 -6 -4 18 37.14 26.11
 6 -4 -18 29.19 16.56
 -6 4 19 7.34 21.97
 6 -4 19 7.13 22.98
 6 4 -19 -6.21 20.55
 -6 -4 -19 27.57 23.81
 -6 4 -19 20.62 24.01
 6 -4 -19 -3.94 7.88
 -6 -4 19 -8.1 18.16
 6 -4 20 -26.63 24.87
 -6 4 20 16 15.03
 6 4 -20 21.47 22.48
 -6 -4 -20 11.3 16.97
 -6 4 -20 0.92 26.22
 -6 -4 20 13.55 21.2
 6 -4 -20 -6.12 8.57
 6 -4 21 36.01 28.63
 6 4 -21 12.99 26
 -6 4 21 37.16 29.1
 -6 -4 -21 9.88 20.19
 6 -4 -21 1.67 10.33
 -6 4 -21 9.72 30.02
 -6 -4 21 12.78 24.8
 6 -4 22 15.64 29.87
 -6 -4 -22 -2.5 35.2
 6 4 -22 17.76 42.22
 -6 4 22 11.84 19.24
 6 -4 -22 7.22 16.9
 -6 4 -22 -9.23 32.36
 -6 -4 22 32.21 26.58
 -6 4 23 14.09 31.53
 6 -4 23 22.1 32.61
 -6 -4 -23 9.09 25.21
 6 4 -23 41.61 47.15
 -6 4 -23 1.8 35.43
 -6 -4 23 21.74 29.26
 -6 4 24 11.21 17.35
 6 -4 24 -9.9 28.7
 -6 -4 -24 -40.33 22.37
 6 4 -24 8.64 25.66
 -6 4 -24 19.24 30.36
 -6 -4 24 0.14 25.14
 -6 4 25 26.36 34.07
 6 -4 25 20.84 35.49
 -6 -4 -25 41.77 38.94
 6 4 -25 -5.67 32.09
 -6 4 -25 24.35 38.4
 -6 -4 25 3.8 31.67
 6 -4 26 9.81 31.31
 -6 -4 -26 -10.26 22.24
 -6 4 26 4.37 18.93
 6 4 -26 13.66 28.04
 -6 4 -26 -23.92 34.32
 -6 -4 26 21.52 28.67
 6 -4 27 37.47 35.81
 -6 -4 -27 -19.9 25.23
 -6 4 27 9.61 22.28
 6 4 -27 35.02 31.51
 -6 4 -27 4.7 39.59
 -6 -4 27 2.86 49.92
 6 -4 28 13.44 36.6
 -6 -4 -28 -5.11 38.73
 -6 4 28 11.64 22.35
 6 4 -28 11.66 33.26
 -6 -4 28 8.89 55.55
 -6 4 -28 -1.87 40.38
 -6 -4 -29 -12.51 24.91
 6 -4 29 -8.48 37.61
 -6 4 29 -7.72 21.72
 6 4 -29 5.96 33.56
 -6 -4 29 -9.7 36.42
 -6 4 -29 7.67 40.62
 -6 4 30 -0.56 33.53
 -6 -4 -30 4.39 24.28
 6 -4 30 37.92 37.54
 6 4 -30 -7.11 33.76
 -6 4 -30 -6.32 40.44
 -6 -4 30 -5.65 36.26
 -6 -4 -31 4.48 42.06
 6 -4 31 22.6 40.83
 -6 4 31 9.36 22.96
 -6 -4 31 10.98 39.27
 -6 4 -31 -19.78 45.51
 -6 -4 -32 9.16 29.57
 6 -4 32 26.65 43.15
 -6 4 32 2.9 24.17
 -6 4 -32 22.98 48.28
 -6 -4 32 15.26 42.22
 7 -4 0 3.33 13.08
 7 4 0 -1.31 1.85
 7 4 0 0.54 6.1
 -7 -4 0 -5.45 10.89
 -7 -4 0 2.3 10.69
 -7 4 0 12.58 12.67
 7 -4 1 10.87 12.94
 -7 -4 -1 -0.23 6.37
 7 4 -1 -1.55 1.8
 -7 4 1 0.63 12.02
 7 4 -1 -2.7 6.8
 7 4 1 0 1.82
 7 4 1 -0.29 8.44
 -7 -4 1 6.01 7.58
 -7 4 -1 -0.65 13.32
 7 -4 -1 3.8 12.67
 7 -4 2 13.1 13.1
 -7 -4 -2 4.16 5.87
 7 4 -2 -0.47 1.87
 -7 4 2 -14.38 11.25
 7 4 2 -0.52 1.94
 -7 -4 2 10.24 12.47
 7 4 2 2.9 4.88
 -7 4 -2 11.28 13.62
 7 -4 -2 13.1 12.36
 7 -4 3 70.15 19.83
 -7 -4 -3 33.11 7.94
 -7 4 -3 53.03 21.4
 -7 -4 3 44.09 12.9
 7 4 3 39.03 9.59
 7 -4 -3 69.57 17.26
 7 -4 4 6.17 15.06
 -7 -4 -4 10.08 7.25
 -7 4 -4 15.84 15.35
 -7 -4 4 1.44 9.57
 7 4 4 8.53 5.49
 7 4 4 0.56 2.14
 7 -4 -4 -5.22 12.45
 7 -4 5 10.56 16.09
 -7 -4 -5 2.48 4.16
 -7 4 -5 -3.87 14.74
 -7 -4 5 8.33 10.67
 7 -4 -5 24.33 13.75
 7 -4 6 54.92 29.69
 -7 -4 -6 9.88 3.98
 -7 4 -6 9.61 17.04
 -7 -4 6 9.32 18.75
 7 -4 -6 9.95 14.83
 7 -4 7 48.28 22.66
 -7 -4 -7 29.39 16.88
 -7 4 -7 42.29 30.72
 -7 -4 7 16.61 23.05
 7 -4 -7 16.65 15.6
 7 -4 8 18.55 19.78
 -7 -4 -8 27.55 22.64
 -7 4 -8 -7.13 20.05
 -7 -4 8 0.86 13.66
 7 -4 -8 18.1 20.84
 7 -4 9 22.46 15.87
 -7 -4 -9 -2.3 12.74
 -7 4 9 0.59 1.1
 -7 4 -9 7.99 18.1
 -7 -4 9 -6.21 12.42
 7 -4 -9 -5.69 11.43
 7 -4 10 8.53 19.85
 -7 -4 -10 20.59 15.69
 -7 4 -10 -12 21.94
 -7 -4 10 5.47 14.94
 7 -4 -10 11.97 20.95
 7 -4 11 5.81 19.67
 -7 -4 -11 12.4 15.1
 -7 4 -11 11.52 21.94
 -7 -4 11 6.53 15.66
 7 -4 -11 2.77 13.84
 7 -4 12 8.08 32.07
 -7 -4 -12 19.65 16.32
 -7 4 -12 27.66 33.65
 -7 -4 12 3.69 17.24
 7 -4 -12 7.27 14.97
 7 -4 13 -6.37 20.12
 -7 -4 -13 4.93 24.71
 -7 -4 13 6.93 16.9
 -7 4 -13 14.16 21.74
 7 -4 -13 10.49 15.21
 7 -4 14 14.27 21.97
 -7 -4 -14 12.63 17.15
 -7 4 -14 7.81 23.25
 -7 -4 14 11.66 19
 7 -4 -14 6.77 8.94
 7 -4 15 -16.92 22.6
 -7 -4 -15 14.58 17.56
 -7 -4 15 -16.9 19.9
 7 -4 -15 12.69 8.62
 -7 4 -15 28.34 24.51
 7 -4 16 17.74 35.49
 -7 -4 -16 -5.38 16.61
 -7 4 -16 8.98 24.69
 -7 -4 16 20.82 19.94
 7 -4 -16 6.05 8.01
 -7 -4 -17 4.07 17.96
 7 -4 17 23.32 25.14
 -7 4 -17 -1.01 27.01
 -7 -4 17 6.57 21.76
 7 -4 -17 10.33 8.57
 7 -4 18 21.52 23.07
 -7 -4 -18 6.32 17.15
 -7 4 -18 -11.32 24.76
 -7 -4 18 -9.88 20.93
 7 -4 -18 2.45 7.43
 -7 -4 -19 30 23.92
 7 -4 19 25.05 33.87
 -7 4 -19 24.35 35.13
 7 -4 -19 40.2 10.67
 -7 -4 19 40.62 30.05
 7 -4 20 22.55 26.06
 -7 4 20 0.47 17.13
 -7 -4 -20 -36.21 19.11
 -7 -4 20 25 36.28
 -7 4 -20 13.64 43.39
 -7 -4 -21 4.34 33.94
 7 -4 21 5.74 30.43
 -7 4 21 18.46 19.74
 -7 4 -21 28.02 51.18
 -7 -4 21 2.84 42.47
 7 -4 22 2.21 29.15
 -7 -4 -22 -22.8 23.27
 7 4 -22 25.72 42.31
 -7 4 22 -5.15 19.51
 -7 4 -22 20.14 48.48
 -7 -4 22 -23.74 40.4
 7 -4 23 6.08 31.94
 -7 -4 -23 40.11 25.81
 7 4 -23 7.97 29.8
 -7 4 23 6.91 22.06
 -7 -4 23 -9.72 29.6
 -7 4 -23 19.09 53.84
 7 -4 24 28.83 52.04
 -7 -4 -24 40.42 26.15
 7 4 -24 -4.59 30.81
 -7 4 24 -5.45 22.19
 -7 -4 24 26.36 30.79
 -7 4 -24 2.77 55.97
 -7 4 25 4.01 21.22
 7 -4 25 24.37 51.38
 -7 -4 -25 -10.58 24.08
 7 4 -25 25.36 29.17
 -7 -4 25 4.34 30
 -7 4 -25 12.49 53.81
 7 -4 26 28.45 57.84
 -7 -4 -26 29.24 26.99
 7 4 -26 -11.91 32.81
 -7 4 26 6.17 38.26
 -7 4 -26 13.37 62.91
 -7 -4 26 19.11 33.83
 7 -4 27 11.39 38.22
 -7 -4 -27 25.43 27.01
 7 4 -27 2 30.77
 -7 4 27 0.61 24.78
 -7 4 -27 6.3 63.96
 -7 -4 27 19.92 34.82
 -7 -4 -28 13.98 25.07
 7 -4 28 -16 36.15
 7 4 -28 -16.05 29.28
 -7 4 28 10.04 23.52
 -7 4 -28 19.87 60.93
 -7 -4 28 10.67 32.75
 -7 -4 -29 7.34 26.22
 7 -4 29 22.55 37.72
 7 4 -29 3.83 29.73
 -7 4 29 1.98 23.2
 -7 4 -29 8.08 41.64
 -7 -4 29 -8.78 34.57
 -7 -4 -30 -44.45 29.62
 7 -4 30 17.78 42.78
 -7 4 30 -4.3 25.68
 -7 4 -30 -26.6 46.57
 -7 -4 30 10.22 39.27
 -7 -4 -31 36.84 49.72
 7 -4 31 -4.82 44.97
 -7 4 31 36.06 42
 -7 -4 31 -3.98 68.78
 -7 4 -31 2.68 49.36
 7 -4 32 -5.56 41.16
 -7 4 32 13.39 23.99
 -7 -4 32 2.97 39.16
 -7 4 -32 -11.03 45.76
 -8 -4 0 8.64 13.5
 8 4 0 12.11 7.76
 -8 4 0 16.27 16.65
 8 -4 0 29.98 17.17
 8 -4 1 7.97 14.45
 8 4 -1 0.27 1.96
 -8 4 1 5.38 12.87
 -8 -4 -1 6.84 7.11
 8 4 1 1.17 2.09
 -8 -4 1 -1.67 7.88
 8 4 1 4.48 5.81
 -8 4 -1 6.17 14.45
 8 -4 -1 7.67 13.93
 8 -4 2 -4.57 13.91
 8 4 -2 -1.6 1.96
 -8 -4 -2 2.77 6.05
 -8 4 2 9.57 18.3
 -8 4 -2 -3.11 14.47
 -8 -4 2 -5.04 8.37
 8 4 2 0.54 2.93
 8 -4 -2 0.34 12.94
 8 -4 3 9.36 17.47
 -8 -4 -3 12.72 9.88
 -8 4 3 11.7 13.48
 -8 4 -3 11.66 17.33
 -8 -4 3 7.04 16.56
 8 -4 -3 5.27 15.46
 8 -4 4 9.16 15.69
 -8 -4 -4 4.79 4.46
 8 4 -4 1.19 1.87
 -8 4 -4 10.29 13.5
 -8 -4 4 2.48 10.15
 8 4 4 -0.32 2.16
 8 -4 -4 4.64 13.32
 8 -4 5 4.41 23
 -8 -4 -5 -3.78 5.33
 -8 -4 -5 17.94 12.18
 -8 -4 -5 1.08 2.59
 8 4 -5 -1.19 2.66
 -8 4 -5 3.04 13.75
 -8 -4 5 -2.93 9.9
 8 -4 -5 -2.79 12.85
 8 -4 6 14.92 17.08
 -8 -4 -6 3.92 3.51
 -8 -4 -6 -4.77 13.71
 -8 -4 -6 3.49 2.7
 8 4 -6 1.26 1.85
 -8 4 -6 5.18 24.46
 -8 -4 6 8.1 11.91
 8 -4 -6 11.95 13.21
 8 -4 7 -2.88 18.01
 -8 -4 -7 4.66 22.37
 -8 4 -7 27.64 19.4
 -8 -4 7 2.07 13.14
 8 -4 -7 2.16 14.34
 8 -4 8 2.81 21.45
 -8 -4 -8 10.87 15.03
 -8 4 -8 23.29 20.55
 -8 -4 8 -5.9 14.16
 8 -4 -8 13.26 13.86
 8 -4 9 10.17 19.9
 -8 -4 -9 0.86 14.94
 -8 4 -9 5.69 20.32
 -8 -4 9 0.77 13.93
 8 -4 -9 3.74 13.21
 8 -4 10 8.06 19.47
 -8 4 10 0.59 1.19
 -8 -4 -10 8.15 13.77
 -8 4 -10 -16.72 30.43
 -8 -4 10 0.27 13.46
 8 -4 -10 -13.68 12.96
 -8 4 11 -0.25 1.22
 8 -4 11 -16.02 26.4
 -8 -4 -11 8.39 14
 -8 4 -11 12.76 17.15
 -8 -4 11 7.94 14.04
 8 -4 -11 2.68 12.36
 8 -4 12 -12.58 20.01
 -8 -4 -12 36.6 25.05
 8 -4 -12 2.79 11.12
 -8 4 -12 3.92 21.09
 -8 -4 12 3.96 16.72
 8 -4 -12 6.17 15.08
 8 -4 13 -25.12 19.36
 -8 -4 -13 10.2 15.15
 -8 4 13 0.7 1.26
 -8 -4 13 5.31 16.16
 -8 4 -13 3.08 20.12
 8 -4 -13 13.66 14
 8 -4 14 0.38 22.39
 -8 -4 -14 21.34 19.47
 -8 4 -14 15.3 24.22
 -8 -4 14 -2.23 19.99
 8 -4 -14 13.26 13.32
 8 -4 15 30.97 36.98
 -8 -4 -15 27.89 27.44
 -8 4 -15 12.9 24.64
 -8 -4 15 -0.36 20.14
 8 -4 -15 5.54 11.93
 -8 -4 -16 9.34 18.37
 8 -4 16 -5.47 24.46
 -8 -4 16 7.25 21.52
 8 -4 -16 8.48 11.64
 -8 4 -16 14.07 25.95
 8 -4 17 24.98 25.95
 -8 -4 -17 30.05 19.47
 -8 4 -17 33.76 43.44
 -8 -4 17 -3.44 23.9
 8 -4 -17 2.23 12.18
 -8 -4 -18 21.29 20.01
 8 -4 18 10.51 26.13
 -8 -4 18 -2.16 23.97
 8 -4 -18 5.96 11.03
 -8 4 -18 40.38 42.9
 8 -4 19 25.93 28.99
 -8 -4 -19 10.56 21.85
 -8 -4 19 19.31 27.35
 -8 4 -19 21.45 47.89
 -8 -4 -20 -1.82 21.49
 8 -4 20 4.79 28.11
 -8 4 20 10.35 21.65
 -8 -4 20 17.74 26.49
 -8 4 -20 25.66 30.43
 8 -4 21 14.27 43.17
 -8 -4 -21 -7.16 33.51
 -8 4 21 5.47 19.04
 -8 -4 21 -5.49 26.06
 -8 4 -21 11.43 30.05
 8 -4 22 12.69 32.52
 -8 -4 -22 7.49 26.22
 -8 4 22 8.91 23.7
 -8 -4 22 18.86 30.41
 -8 4 -22 34.28 35.09
 8 -4 23 2.34 31.55
 -8 -4 -23 24.17 24.89
 -8 4 23 -8.3 23.07
 -8 -4 23 -5.69 30.11
 -8 4 -23 32.63 33.71
 8 -4 24 3.6 34.21
 -8 -4 -24 25.36 41.93
 -8 4 24 24.69 39.21
 -8 -4 24 0.61 33.29
 -8 4 -24 18.75 37.68
 8 -4 25 -12.09 35.45
 -8 -4 -25 3.65 26.78
 -8 4 25 18.97 23.97
 -8 -4 25 6.75 50.89
 -8 4 -25 31.44 38.19
 -8 4 26 9.41 28.74
 8 -4 26 19.6 41.93
 -8 -4 -26 30.92 31.73
 -8 -4 26 55.05 38.71
 -8 4 -26 45.17 44.25
 8 -4 27 3.85 40.26
 -8 -4 -27 69.12 46.9
 -8 4 27 12.2 28.25
 -8 -4 27 10.15 37.74
 -8 4 -27 11.1 44.38
 8 -4 28 -12.92 35.65
 -8 -4 -28 -10.02 25.77
 -8 4 28 -9.39 24.37
 -8 -4 28 17.44 33.92
 -8 4 -28 15.26 38.35
 8 -4 29 21.49 39.3
 -8 -4 -29 6.26 28.61
 -8 4 29 16.74 40.62
 -8 -4 29 -9.95 37.25
 -8 4 -29 -4.05 65.81
 8 -4 30 -4.19 40.94
 -8 -4 -30 13.55 28.94
 -8 4 30 10.15 26.22
 -8 -4 30 2.27 38.64
 -8 4 -30 16.32 69.28
 -8 -4 -31 10.4 52.58
 8 -4 31 15.96 44.74
 -8 4 31 13.28 28.25
 -8 -4 31 28.49 42.33
 -8 4 -31 -15.19 78.57
 -9 -4 0 9.7 14.38
 -9 4 0 8.73 16.83
 9 -4 0 23.99 18.46
 -9 -4 -1 6.55 7.07
 9 4 -1 0.81 1.94
 -9 4 1 17.58 20.1
 9 -4 1 -0.11 15.98
 -9 4 -1 5.67 22.57
 -9 -4 1 -3.58 8.69
 9 4 1 0.63 2.12
 9 -4 -1 16.43 14.29
 9 -4 2 8.62 15.57
 9 4 -2 2.61 3.11
 -9 -4 -2 0.02 9.77
 -9 4 2 3.92 12.58
 -9 4 -2 -2.36 14.85
 -9 -4 2 7.67 9.3
 9 4 2 -0.59 2.16
 9 -4 -2 1.46 14.22
 9 -4 3 15.3 17.13
 -9 -4 -3 1.24 6.35
 -9 4 3 22.03 12.78
 -9 -4 -3 1.42 5.63
 -9 4 -3 -4.37 23.11
 -9 -4 3 7.81 10.87
 9 -4 -3 15.46 24.17
 9 -4 4 31.51 25.21
 9 4 -4 1.37 2.05
 -9 -4 -4 0.02 7.65
 -9 -4 -4 1.6 13.05
 -9 -4 -4 0.81 5.85
 -9 4 -4 4.75 14.61
 -9 -4 4 7.85 16.79
 9 -4 -4 0.34 15.15
 9 -4 5 7.92 16.83
 -9 -4 -5 9.59 5.87
 9 4 -5 1.15 1.82
 -9 -4 -5 -15.1 14.31
 -9 -4 -5 5.6 4.64
 -9 4 -5 19.11 15.39
 -9 -4 5 3.17 25.03
 9 -4 -5 -7.07 23.74
 9 -4 6 43.87 23.77
 -9 -4 -6 17.74 18.28
 -9 4 -6 41.55 37.16
 -9 -4 6 28.56 22.35
 9 -4 -6 31.26 19.15
 9 -4 7 -10.49 19.04
 -9 -4 -7 4.79 15.1
 -9 4 -7 26.72 20.75
 -9 -4 7 -9.59 19.83
 9 -4 -7 44.61 24.62
 9 -4 8 2.68 17.8
 -9 -4 -8 9.45 14.4
 9 4 -8 0.97 1.94
 -9 4 -8 1.44 19.38
 9 -4 -8 6.77 13.35
 -9 -4 8 -11.19 18.59
 9 -4 9 25.07 23.36
 -9 -4 -9 22.24 18.75
 -9 4 -9 27.53 39.99
 -9 -4 9 7.2 25.66
 9 -4 -9 45.31 27.01
 9 -4 10 -17.22 34.07
 -9 -4 -10 -2.23 15.96
 9 -4 -10 4.59 9.68
 -9 4 -10 16.2 19.81
 9 -4 -10 7.25 15.01
 -9 -4 10 11.7 22.46
 9 -4 11 -4.55 22.55
 -9 -4 -11 36.64 25.05
 -9 4 -11 -9.95 20.62
 -9 -4 11 8.26 23.43
 9 -4 -11 -2.34 24.01
 9 -4 12 5.18 21.07
 -9 4 12 0.41 1.06
 -9 -4 -12 -9.86 15.17
 -9 -4 12 16.23 22.01
 -9 4 -12 4.46 19.49
 9 -4 -12 3.44 14.72
 9 -4 13 12.47 25.05
 -9 -4 -13 -12.15 18.95
 -9 4 -13 32.32 24.4
 -9 -4 13 30.61 28
 9 -4 -13 12.51 17.74
 9 -4 14 4.14 22.51
 -9 -4 -14 -8.21 25.97
 -9 4 -14 -12.58 23.47
 9 -4 -14 5.49 6.75
 -9 -4 14 7.67 26.63
 9 -4 15 14.49 21.45
 -9 -4 -15 -24.37 16.47
 -9 4 -15 -0.02 35.38
 -9 -4 15 32.43 26.36
 9 -4 -15 1.64 5.94
 9 -4 16 19.49 25.25
 -9 -4 -16 -1.49 19.56
 -9 4 -16 16.41 41.5
 -9 -4 16 21 31.94
 -9 -4 -17 27.84 26.54
 9 -4 17 -4.73 22.01
 -9 4 -17 -16.27 23.34
 -9 -4 17 -4.57 44.34
 9 -4 18 30.38 44.74
 -9 -4 -18 8.67 22.87
 -9 4 -18 37.79 31.62
 -9 -4 18 10.17 44.32
 9 -4 19 27.57 44.27
 -9 -4 -19 16.59 22.21
 -9 4 -19 2.84 30.2
 -9 -4 19 4.57 27.32
 9 -4 20 11.55 31.49
 -9 -4 -20 32 37.99
 -9 4 20 41.1 24.6
 -9 -4 20 -22.17 30.99
 -9 4 -20 18.07 33.96
 9 -4 21 21.07 25.93
 -9 -4 -21 -7.02 21.99
 -9 4 21 -9.93 20.46
 -9 -4 21 13.26 25.97
 -9 4 -21 -2.3 28.52
 -9 4 22 25.93 34.84
 9 -4 22 -13.5 28.04
 -9 -4 -22 -14 23.79
 -9 -4 22 7.97 27.44
 -9 4 -22 32.07 31.8
 9 -4 23 -25.34 29.66
 -9 -4 -23 8.35 24.17
 -9 4 23 11.12 23.09
 -9 -4 23 8.19 29.24
 -9 4 -23 4.79 32.57
 -9 -4 -24 17.92 25.54
 9 -4 24 14.9 31.98
 -9 4 24 -1.89 25.43
 -9 -4 24 -2.05 32.95
 -9 4 -24 4.86 36.44
 -9 4 25 -3.13 26.2
 9 -4 25 10.85 34.95
 -9 -4 -25 19.56 27.68
 -9 -4 25 16.27 35.18
 -9 4 -25 16.59 39.45
 9 -4 26 20.84 30.81
 -9 -4 -26 -25.43 24.55
 -9 4 26 9.48 23.11
 -9 -4 26 -15.26 31.71
 -9 4 -26 15.87 35.11
 9 -4 27 -7.83 33.58
 -9 -4 -27 -0.61 42.09
 -9 4 27 22.64 39.45
 -9 -4 27 7.47 55.25
 -9 4 -27 4.88 39.52
 9 -4 28 -8.06 39.75
 -9 -4 -28 31.71 31.53
 -9 4 28 18.97 29.51
 -9 -4 28 2.52 61.22
 -9 4 -28 -1.58 44.72
 -9 4 29 13.46 30.27
 9 -4 29 19.2 63.11
 -9 -4 -29 14.56 31.35
 -9 -4 29 4.64 40.35
 -9 4 -29 18.01 46.36
 9 -4 30 19.58 63.56
 -9 -4 -30 -1.1 30.74
 -9 4 30 15.8 28.11
 -9 -4 30 5.45 41.37
 -9 4 -30 28.45 46.3
 -10 4 0 4.39 16.25
 -10 -4 0 1.51 9.9
 10 -4 0 25.84 17.47
 -10 -4 -1 1.06 8.17
 10 4 -1 2.41 3.49
 -10 4 1 3.53 14.34
 10 -4 1 8.91 16.68
 -10 4 -1 13.44 15.48
 -10 -4 1 13.19 20.82
 10 4 1 1.4 2.39
 10 -4 -1 2.05 15.8
 -10 -4 -2 18.86 12.83
 -10 4 2 17.22 15.28
 -10 -4 -2 8.15 15.69
 -10 -4 -2 5.63 6.64
 10 -4 2 42.78 20.35
 -10 4 -2 10.35 18.93
 -10 -4 2 10.65 16.77
 10 -4 3 -14.79 30
 -10 4 3 4.95 13.73
 -10 -4 -3 2.48 6.91
 -10 -4 -3 25.84 15.06
 -10 -4 -3 1.33 5.45
 -10 4 -3 12.4 16.18
 -10 -4 3 27.5 16.83
 10 -4 -3 25.09 17.56
 10 -4 4 2.07 17.62
 10 4 -4 -0.27 2.81
 -10 -4 -4 7.63 5.58
 -10 4 4 -10.17 18.64
 -10 -4 -4 -10.47 21.85
 -10 -4 -4 -0.92 4.1
 -10 4 -4 12.9 15.15
 -10 -4 4 18.12 15.89
 10 -4 -4 9.43 16.25
 10 -4 5 -4.07 18.16
 10 4 -5 2.66 2.16
 -10 -4 -5 5.02 4.32
 -10 -4 -5 -8.55 13.89
 -10 -4 -5 -1.15 3.94
 -10 -4 5 4.37 17.69
 10 -4 -5 4.95 15.6
 10 -4 6 -11.88 18.7
 10 4 -6 0.81 2.09
 -10 -4 -6 2.79 2.93
 -10 -4 -6 4.28 14.47
 -10 -4 -6 3.17 2.7
 -10 4 -6 12.76 19.54
 -10 -4 6 11.64 18.55
 10 -4 -6 11.75 15.75
 10 -4 7 15.39 17.85
 10 4 -7 -1.1 2.61
 -10 -4 -7 2.41 21.4
 -10 4 -7 13.66 19.18
 10 -4 -7 -7.2 14.2
 -10 -4 7 1.17 18.59
 10 -4 8 1.01 19.11
 10 4 -8 2.27 2.16
 -10 -4 -8 -6.21 14.79
 -10 4 -8 20.21 21.16
 -10 -4 8 22.48 20.95
 10 -4 -8 9.39 15.28
 10 -4 9 11.43 23.43
 -10 -4 -9 12.24 17.96
 -10 -4 9 15.62 25.09
 -10 4 -9 3.22 22.46
 10 -4 -9 30.09 18.37
 10 -4 10 16.81 22.44
 -10 -4 -10 30.16 26.78
 -10 4 -10 -3.4 22.3
 -10 -4 10 19.65 25.39
 10 -4 -10 -2 17.1
 10 -4 11 -6.14 23.79
 -10 -4 -11 21.97 18.91
 -10 4 -11 -1.8 24.82
 -10 -4 11 56.09 27.95
 10 -4 -11 1.53 29.06
 10 -4 12 -6.32 35.18
 -10 -4 -12 12.45 19.18
 -10 4 -12 2.43 23.63
 -10 -4 12 17.4 28.09
 10 -4 -12 7.92 18.48
 10 -4 13 0.34 24.89
 -10 -4 -13 -14.7 27.3
 -10 -4 13 -9.97 28.07
 -10 4 -13 20.28 24.4
 10 -4 -13 6.08 6.73
 10 -4 -13 11.12 21.16
 10 -4 14 -3.6 27.08
 -10 -4 -14 14.13 19
 -10 4 -14 2 40.94
 -10 -4 14 16.02 30.81
 10 -4 15 15.84 27.75
 -10 -4 -15 15.91 21.22
 -10 -4 15 23.47 33.67
 -10 4 -15 -16.81 43.1
 10 -4 16 0.99 25.79
 -10 -4 -16 -9.81 29.19
 -10 -4 16 -0.27 31.15
 -10 4 -16 -1.71 25.12
 10 -4 17 -5.33 43.73
 -10 -4 -17 1.46 22.51
 -10 -4 17 26.29 37.56
 -10 4 -17 37.54 30.5
 -10 -4 -18 25.63 22.71
 10 -4 18 -19.29 28.25
 -10 -4 18 30.36 38.96
 -10 4 -18 13.55 31.01
 -10 -4 -19 23.27 38.06
 10 -4 19 4.21 30.86
 -10 -4 19 29.64 41.59
 -10 4 -19 20.55 33.13
 10 -4 20 37.05 33.53
 -10 -4 -20 5.22 29.35
 -10 4 20 20.73 41.28
 -10 -4 20 50.17 46.36
 -10 4 -20 19.63 37.7
 10 -4 21 -16.41 30.02
 -10 4 21 7.38 24.69
 -10 -4 -21 -15.3 25.7
 -10 -4 21 3.51 65.43
 -10 4 -21 -15.01 34.37
 10 -4 22 11.28 34.1
 -10 -4 -22 7.79 28.81
 -10 4 22 22.73 27.46
 -10 -4 22 17.65 53.81
 -10 4 -22 26.09 37.99
 10 -4 23 3.8 33.4
 -10 -4 -23 59.53 42.13
 -10 4 23 1.35 29.1
 -10 -4 23 12.81 34.77
 -10 4 -23 -0.95 38.78
 10 -4 24 42.4 45.28
 -10 -4 -24 5.36 24.06
 -10 4 24 -12.15 25.63
 -10 -4 24 -17.58 30.77
 -10 4 -24 16.32 34.21
 -10 4 25 16.47 42.74
 10 -4 25 16.99 55.66
 -10 -4 -25 8.8 29.06
 -10 -4 25 -8.57 36.96
 -10 4 -25 21.97 39.81
 -10 4 26 6.59 26.54
 10 -4 26 -10.06 33.29
 -10 -4 -26 22.75 27.39
 -10 4 -26 -21.97 39.21
 -10 -4 26 5.94 35.34
 10 -4 27 11.3 39.05
 -10 4 27 -6.32 30.5
 -10 -4 -27 22.19 29.73
 -10 4 -27 21 44.68
 -10 -4 27 14.83 39.09
 10 -4 28 2.9 35.34
 -10 -4 -28 7.11 27.44
 -10 4 28 -8.57 26.94
 -10 -4 28 -27.01 37
 -10 4 -28 14.81 40.71
 10 -4 29 -7.92 41.84
 -10 -4 -29 17.8 32.93
 -10 4 29 21.7 32.81
 -10 4 -29 19.51 48.82
 -10 -4 29 35.11 68.94
 -11 4 0 21.58 23.56
 -11 -4 0 -1.6 13.57
 11 -4 0 -20.12 17.42
 -11 -4 0 2.52 13.55
 -11 -4 -1 9.18 14.45
 -11 -4 -1 13.37 15.84
 -11 4 1 1.87 17.67
 11 -4 1 6.26 20.03
 -11 4 -1 16.61 18.93
 -11 -4 1 11.07 17.06
 11 -4 -1 24.06 32.09
 -11 -4 -2 8.1 12.63
 -11 4 2 -0.95 14.25
 -11 -4 -2 12.56 14.63
 -11 -4 -2 -5.47 7.04
 11 -4 2 16.88 19.63
 -11 4 -2 15.3 23.54
 -11 -4 2 4.91 16.41
 11 -4 -2 20.14 18.32
 -11 -4 -3 13.08 8.24
 -11 4 3 15.19 24.04
 -11 -4 -3 5.81 16.45
 11 -4 3 16.65 22.15
 -11 -4 3 14.11 30.16
 -11 4 -3 -0.47 18.19
 11 -4 -3 22.28 20.46
 11 4 -4 2.34 2.41
 -11 4 4 6.44 13.1
 -11 -4 -4 13.44 9.48
 -11 -4 -4 9.86 14.88
 11 -4 4 -15.35 19.65
 -11 4 -4 21.72 16.81
 -11 -4 4 -4.75 20.35
 11 -4 -4 -12.63 17.33
 11 -4 5 12.49 18.95
 11 4 -5 0.54 2.09
 -11 -4 -5 6.48 7.88
 -11 -4 -5 -10.04 14.9
 -11 -4 5 -8.19 19.9
 -11 4 -5 16.11 19
 11 -4 -5 13.77 16.65
 11 -4 6 -11.57 19.78
 11 4 -6 2.14 3.4
 -11 -4 -6 1.6 3.76
 -11 -4 -6 9.54 14.99
 -11 4 -6 4.68 20.32
 -11 -4 6 2.72 14.22
 11 -4 -6 14.25 16.2
 11 -4 7 11.91 22.69
 -11 -4 -7 12.47 16.99
 -11 4 -7 14.52 24.22
 -11 -4 7 17.01 16.86
 11 -4 -7 0.36 18.73
 11 -4 8 -9.32 23.61
 -11 -4 -8 20.48 17.83
 -11 4 -8 0 34.55
 -11 -4 8 19.29 18.01
 11 -4 -8 11.46 28.74
 11 -4 9 26.81 27.62
 -11 -4 -9 27.66 21.09
 -11 4 -9 13.82 26.49
 -11 -4 9 40.83 21.72
 11 -4 -9 22.87 22.12
 11 -4 10 -9.72 19.45
 -11 4 10 -0.14 0.95
 -11 -4 -10 2 15.53
 11 4 -10 0.25 1.8
 -11 4 -10 -7.81 18.95
 -11 -4 10 -3.8 15.64
 11 -4 -10 18.3 15.1
 11 -4 11 -6.84 40.49
 -11 -4 -11 22.33 20.05
 -11 4 -11 9.7 26.2
 -11 -4 11 36.51 33.62
 11 -4 -11 10.76 21.31
 11 -4 12 37.41 26.45
 -11 -4 -12 10.87 19.56
 -11 4 -12 -0.77 26.85
 -11 -4 12 9 34.75
 11 -4 -12 14.92 20.82
 11 -4 13 3.6 26.51
 -11 -4 -13 31.76 20.59
 -11 4 -13 19.92 43.48
 -11 -4 13 13.46 36.64
 11 -4 -13 -1.26 24.49
 11 -4 14 10.58 26.18
 -11 -4 -14 12.36 20.73
 -11 4 -14 5.85 43.57
 -11 -4 14 28.13 52.73
 -11 -4 -15 25.25 34.62
 -11 -4 15 12.15 36.66
 -11 4 -15 13.23 30.14
 11 -4 16 3.11 26.18
 -11 -4 -16 4.25 19.04
 11 4 -16 0.72 2.77
 -11 -4 16 2.36 31.73
 -11 4 -16 15.3 25.7
 -11 -4 -17 16 23.74
 11 -4 17 4.01 32.88
 -11 -4 17 37.05 40.69
 -11 4 -17 18.79 32.45
 -11 -4 -18 31.67 25.86
 11 -4 18 20.37 36.06
 -11 -4 18 26.38 44.27
 -11 4 -18 10.62 35.36
 11 -4 19 -9.54 28.63
 -11 -4 -19 -1.13 22.8
 -11 -4 19 5.11 37.02
 -11 4 -19 14.11 29.19
 11 -4 20 21.76 32.95
 -11 4 20 -5.11 38.67
 -11 -4 -20 -10.42 26.04
 -11 4 -20 12.96 33.2
 -11 -4 20 29.51 41.28
 11 -4 21 33.92 52.04
 -11 -4 -21 16.86 29.12
 -11 4 21 12.4 27.62
 -11 -4 21 9.07 46.75
 -11 4 -21 8.57 38.51
 -11 4 22 17.1 29.53
 11 -4 22 44.7 35.7
 -11 -4 -22 -8.51 46.88
 -11 -4 22 6.64 51.13
 -11 4 -22 12.33 39.9
 11 -4 23 8.53 33.2
 -11 -4 -23 3.92 27.62
 -11 4 23 11.64 29.42
 -11 -4 23 36.24 74.05
 -11 4 -23 -0.29 37.95
 11 -4 24 8.26 34.37
 -11 -4 -24 -5.02 28.18
 -11 4 24 23.65 30.83
 -11 -4 24 -8.69 56.74
 -11 4 -24 24.55 39.84
 11 -4 25 35.36 37.43
 -11 -4 -25 7.54 31.01
 -11 4 25 13.1 52.06
 -11 -4 25 -10.56 38.8
 -11 4 -25 17.94 43.39
 11 -4 26 19.9 33.33
 -11 -4 -26 -17.83 41.5
 -11 4 26 5.13 28.25
 -11 -4 26 -22.17 35.27
 -11 4 -26 18.03 39.05
 11 -4 27 8.96 38.17
 -11 -4 -27 15.28 29.87
 -11 4 27 0.09 30.65
 -11 -4 27 8.39 40.26
 -11 4 -27 11.91 44.72
 11 -4 28 23.43 40.6
 -11 -4 -28 -4.16 31.49
 -11 4 28 32.36 51.52
 -11 -4 28 55.66 43.19
 -11 4 -28 -31.8 47.53
 -12 4 0 84.62 28.2
 -12 -4 0 86.63 27.75
 -12 -4 0 95.34 25.07
 12 -4 0 79.88 51.13
 -12 -4 -1 11.5 22.48
 -12 -4 -1 4.19 15.33
 -12 4 1 1.35 16.97
 12 -4 1 3.11 20.35
 -12 4 -1 9.48 18.05
 -12 -4 1 3.42 11.66
 -12 -4 1 1.13 15.53
 12 -4 -1 11.64 20.77
 -12 -4 -2 0.09 13.44
 -12 4 2 0.05 25.09
 -12 -4 -2 -2.72 16.11
 12 -4 2 12.69 21.16
 -12 4 -2 7.29 17.49
 -12 -4 2 6.77 13.28
 -12 -4 2 18.66 15.37
 12 -4 -2 14.04 20.89
 -12 -4 -3 2.68 16.52
 -12 4 3 7.61 13.55
 -12 -4 -3 14.92 14.47
 12 4 -3 -0.34 2.16
 12 -4 3 -22.26 27.77
 -12 4 -3 10.26 15.84
 -12 -4 3 6.05 12.36
 12 -4 -3 4.46 17.56
 -12 4 4 2.79 12.63
 -12 -4 -4 26.51 21.67
 -12 -4 -4 -6.35 7.13
 12 4 -4 1.06 2.32
 12 -4 4 9.95 18.79
 -12 -4 4 18.57 13.35
 12 -4 -4 -27.35 17.83
 -12 -4 -5 22.15 11.21
 -12 -4 -5 6.14 18.28
 12 -4 5 32.88 23.92
 -12 4 -5 12.76 24.24
 -12 -4 5 -10.94 17.4
 12 -4 -5 24.6 31.31
 -12 -4 -6 45.1 22.42
 12 -4 6 67.47 46.5
 -12 -4 6 45.35 22.46
 -12 4 -6 24.35 30.16
 12 -4 -6 49.38 24.44
 12 -4 7 44.45 29.66
 -12 -4 -7 41.73 35.4
 -12 4 -7 59.08 31.55
 -12 -4 7 29.64 23.18
 12 -4 -7 44.68 23.97
 12 -4 8 12.29 27.59
 -12 -4 -8 30.29 21.43
 -12 -4 8 11.79 21.34
 -12 4 -8 16.23 26.29
 12 -4 -8 41.91 22.84
 12 -4 9 24.71 20.1
 12 4 -9 -0.2 2.93
 -12 -4 -9 9.99 16.02
 -12 4 -9 -18.05 20.1
 -12 -4 9 -5.42 16.95
 12 -4 -9 -7 17.06
 12 -4 10 -5 21.47
 12 4 -10 0.38 1.98
 -12 -4 -10 7.18 16.41
 -12 4 -10 15.19 21.29
 -12 -4 10 3.31 17.92
 12 -4 -10 -6.93 28.13
 12 -4 11 17.98 21.45
 12 4 -11 -0.61 2.09
 -12 -4 -11 4.84 15.75
 -12 4 -11 16.97 21.63
 -12 -4 11 4.23 18.19
 12 -4 -11 -11.39 18.37
 12 -4 12 21.36 26.81
 -12 -4 -12 -6.82 20.37
 -12 -4 12 14.61 23.61
 -12 4 -12 14 27.95
 12 -4 -12 23.07 22.26
 12 -4 13 -1.37 38.62
 -12 -4 -13 -3.38 19.29
 -12 -4 13 2.25 22.01
 -12 4 -13 39.68 39
 12 -4 14 -1.17 24.17
 -12 -4 -14 -12.58 29.01
 12 4 -14 -1.17 2.09
 -12 -4 14 -3.06 21.74
 -12 4 -14 6.3 24.71
 12 -4 15 37.11 32.12
 -12 -4 -15 7.7 25.61
 -12 -4 15 35.02 30.38
 -12 4 -15 39.81 34.5
 12 -4 16 -7.67 24.04
 12 4 -16 0.18 3.04
 -12 -4 -16 14.72 19.6
 -12 -4 16 6.41 35.22
 -12 4 -16 2.93 25.79
 12 -4 17 4.57 24.67
 -12 -4 -17 12.83 30.32
 12 4 -17 -0.29 2.03
 -12 -4 17 -11.1 52.49
 -12 4 -17 -6.1 26.9
 12 -4 18 29.06 45.49
 -12 -4 -18 -0.25 25
 -12 -4 18 -5.83 41.32
 -12 4 -18 23.77 33.47
 12 -4 19 43.03 55.46
 -12 -4 -19 8.28 28.22
 -12 -4 19 2.52 45.73
 -12 4 -19 18.34 36.24
 12 -4 20 11.03 34.82
 -12 -4 -20 22.84 27.28
 -12 4 20 22.26 41.28
 -12 -4 20 14.29 45.33
 -12 4 -20 -36.57 36.15
 12 -4 21 3.35 33.83
 -12 -4 -21 13.8 43.48
 -12 4 21 -4.03 26.51
 -12 -4 21 -11.64 44.68
 -12 4 -21 30.41 35.11
 12 -4 22 12.2 38.62
 -12 -4 -22 10.49 28.83
 -12 4 22 24.26 29.75
 -12 4 -22 8.69 41.07
 -12 -4 22 1.73 51.92
 12 -4 23 2.27 39.93
 -12 -4 -23 0.52 31.13
 -12 4 23 17.65 33.26
 -12 -4 23 28.36 53.9
 -12 4 -23 49.54 43.37
 12 -4 24 21.4 34.93
 -12 4 24 0.54 29.26
 -12 -4 -24 -14.85 26.96
 -12 -4 24 -0.74 48.12
 -12 4 -24 -12.11 38.42
 12 -4 25 12.47 42.02
 -12 -4 -25 7.27 50.1
 -12 4 25 23.25 35.54
 -12 -4 25 0.38 92.05
 -12 4 -25 20.23 46.18
 12 -4 26 -1.35 39.79
 -12 -4 -26 14.97 29.71
 -12 4 26 7.83 32.14
 -12 -4 26 -29.35 60.97
 -12 4 -26 14.54 43.37
 12 -4 27 -2.34 56.15
 -12 -4 -27 10.2 26.94
 -12 4 27 -4.34 28.49
 -12 -4 27 0.56 36.3
 -12 4 -27 -19.78 40.24
 -13 4 0 5.74 18.7
 -13 -4 0 6.08 12.31
 -13 -4 0 -0.97 15.89
 13 -4 0 13.68 22.46
 -13 -4 -1 13.75 12.85
 -13 -4 -1 34.16 18.95
 -13 4 1 18.41 20.62
 13 -4 1 21.04 25.91
 -13 4 -1 15.15 22.12
 -13 -4 1 -9.09 18.19
 13 -4 -1 43.73 25.5
 -13 -4 1 18.41 15.06
 -13 -4 -2 29.98 20.55
 -13 -4 -2 18.91 30.25
 -13 4 2 17.01 32.23
 13 -4 2 50.23 26.94
 -13 4 -2 28.76 21.9
 -13 -4 2 9.45 17.67
 -13 -4 2 41.68 30.99
 13 -4 -2 46.45 25.18
 -13 -4 -3 -0.65 19.96
 -13 -4 -3 0.7 15.87
 -13 4 3 2.5 14.99
 13 -4 3 0.09 21.45
 -13 4 -3 17.22 18.14
 -13 -4 3 -4.37 14.74
 -13 -4 3 6.37 15.53
 13 -4 -3 8.67 19.94
 -13 4 4 23.16 15.78
 -13 -4 -4 15.37 14.22
 -13 -4 -4 10.62 18.73
 13 -4 4 27.66 24.71
 -13 4 -4 9.52 38.87
 -13 -4 4 11.48 17.96
 -13 -4 4 1.85 17.85
 13 -4 -4 24.17 35.31
 -13 -4 -5 2.9 25.05
 13 4 -5 -1.64 2.07
 13 -4 5 0.05 22.3
 -13 4 -5 -0.27 21.29
 -13 -4 5 -19.13 23.95
 13 -4 -5 24.58 18.19
 -13 -4 -6 4.5 19.18
 13 -4 6 25.91 26.15
 -13 4 -6 -5.45 26.96
 -13 -4 6 9.48 30.56
 13 -4 -6 31.1 22.42
 -13 -4 -7 27.01 19.76
 13 -4 7 33.53 26.74
 -13 4 -7 6.82 42.87
 -13 -4 7 0.32 20.73
 13 -4 -7 -3.44 22.53
 13 -4 8 4.3 34.62
 -13 -4 -8 11.34 17.33
 13 4 -8 0.56 2.21
 -13 4 -8 9.81 21.4
 -13 -4 8 10.24 18.32
 13 -4 -8 -2.07 18.77
 13 -4 9 29.21 28.4
 -13 -4 -9 9.57 31.98
 -13 -4 9 -0.52 23.32
 -13 4 -9 21.16 27.59
 13 -4 -9 27.12 23.43
 13 -4 10 19.76 27.46
 -13 -4 -10 3.42 20.26
 -13 4 -10 13.95 26.76
 -13 -4 10 -0.02 23.34
 13 -4 -10 20.62 22.73
 13 -4 11 9.3 28.49
 -13 -4 -11 25.68 21.22
 -13 4 -11 0.7 28.31
 -13 -4 11 -22.48 24.04
 13 -4 -11 32.59 22.66
 13 4 -12 4.34 3.53
 13 -4 12 12.13 41.14
 -13 -4 -12 16.81 20.28
 -13 4 -12 30.09 41.95
 -13 -4 12 -9.48 23.02
 13 -4 -12 5.13 25.27
 13 -4 13 21.58 30.41
 -13 -4 -13 9.34 22.91
 -13 -4 13 11.7 28.02
 -13 4 -13 21.07 47.42
 13 -4 14 14.63 28.02
 -13 -4 -14 -8.1 22.15
 -13 -4 14 20.73 26.22
 -13 4 -14 10.83 29.37
 13 -4 15 34.68 32.86
 -13 -4 -15 20.37 25.86
 -13 4 -15 -2.99 34.21
 -13 -4 15 32.3 30.83
 13 -4 16 7.31 51.25
 -13 -4 -16 24.91 41.46
 -13 -4 16 25.18 32.79
 -13 4 -16 18.64 36.1
 13 -4 17 19.31 26.49
 -13 -4 -17 22.87 22.98
 13 4 -17 0.68 3.08
 -13 -4 17 5.76 26.58
 -13 4 -17 -2.75 28.97
 13 -4 18 23.99 30.81
 -13 -4 -18 4.25 27.26
 -13 -4 18 -5.58 48.16
 -13 4 -18 3.89 34.48
 13 -4 19 16.56 28.4
 -13 -4 -19 -23.56 26.06
 -13 -4 19 51.49 64.21
 -13 4 -19 9.63 32.57
 13 -4 20 4.59 33.76
 -13 4 20 -2.57 46.05
 -13 -4 -20 31.4 47.02
 -13 -4 20 28.38 50.28
 -13 4 -20 11.52 39.57
 13 -4 21 -1.87 35.31
 -13 -4 -21 7.56 29.6
 -13 4 21 7.13 30.65
 -13 -4 21 65.22 52.6
 -13 4 -21 27.57 41.91
 13 -4 22 17.15 33.49
 -13 4 22 -5.51 29.98
 -13 -4 -22 10.42 27.93
 -13 -4 22 13.37 51.67
 -13 4 -22 9.7 40.4
 13 -4 23 10.96 49.18
 -13 -4 -23 -6.91 26.85
 -13 4 23 -13.59 30
 -13 -4 23 5.47 48.34
 -13 4 -23 38.06 37.88
 13 -4 24 19.27 57.03
 -13 -4 -24 31.71 44.59
 -13 4 24 -30.25 31.13
 -13 -4 24 -30.14 51.79
 -13 4 -24 17.6 40.13
 13 -4 25 38.64 45.67
 -13 -4 -25 5.29 34.34
 -13 4 25 28.61 39.54
 -13 -4 25 1.42 63.38
 -13 4 -25 51.74 50.62
 13 -4 26 11.66 40.24
 -13 -4 -26 30.36 30.9
 -13 4 26 6.14 32.43
 -13 -4 26 -12.29 57.28
 -13 4 -26 -33.53 45.17
 -14 4 0 18.41 22.82
 -14 -4 0 26.96 23.74
 -14 -4 0 17.96 19.51
 14 -4 0 22.21 43.53
 -14 -4 -1 49.76 23.7
 -14 4 1 48.05 25.66
 -14 -4 -1 23.07 17.83
 14 -4 1 64.77 32.3
 -14 4 -1 54.51 42.99
 -14 -4 1 45.42 23.47
 14 -4 -1 86.13 31.62
 -14 -4 -2 8.98 11.55
 -14 -4 -2 -3.69 17.67
 -14 4 2 -7.61 17.33
 14 -4 2 14.72 25.25
 -14 4 -2 23.63 19.15
 -14 -4 2 -0.65 21.76
 -14 -4 2 -4.7 16.95
 14 -4 -2 33.87 22.8
 -14 -4 -3 11.66 27.82
 -14 4 3 12.87 16.41
 -14 4 -3 -0.16 21.29
 -14 -4 3 14.4 24.15
 -14 -4 3 11.79 17.49
 14 -4 -3 -17.22 37.23
 -14 4 4 7.65 14.45
 -14 -4 -4 5.92 18.32
 14 -4 4 8.82 24.24
 -14 4 -4 -20.59 37.61
 -14 -4 4 20.48 25.79
 -14 -4 4 20.84 24.98
 14 -4 -4 -8.08 22.01
 -14 -4 -5 18.7 19.24
 14 -4 5 18.52 25.41
 -14 4 -5 -15.64 26.49
 -14 -4 5 -5.29 27.53
 -14 -4 5 12.69 17.53
 14 -4 -5 11.61 22.19
 -14 -4 -6 18.16 19.85
 14 -4 6 -9.84 26.31
 -14 4 -6 -0.41 27.64
 -14 -4 6 36.33 29.26
 -14 -4 6 2.23 17.62
 14 -4 -6 23.05 36.62
 -14 -4 -7 22.73 29.39
 14 -4 7 4.39 25.23
 -14 4 -7 -6.39 40.38
 -14 -4 7 -15.6 28.56
 -14 -4 7 -0.32 15.93
 14 -4 -7 13.55 21.49
 -14 -4 -8 8.82 20.89
 14 -4 8 16.79 28.65
 -14 4 -8 8.35 26.85
 -14 -4 8 21.74 34.01
 14 -4 -8 21.09 25.07
 -14 -4 -9 3.31 17.56
 14 4 -9 0.83 2.32
 14 -4 9 3.89 24.58
 -14 4 -9 5.78 23.34
 -14 -4 9 13.86 29.71
 14 -4 -9 -1.82 21
 -14 -4 -10 25.36 22.06
 14 -4 10 45.87 46.21
 -14 4 -10 -3.26 28.85
 -14 -4 10 29.69 38.98
 14 -4 -10 -9.16 24.78
 14 -4 11 -0.02 26.81
 -14 -4 -11 -0.59 30.14
 -14 4 -11 5.2 27.32
 -14 -4 11 41.61 35.94
 14 -4 -11 -8.24 21.49
 14 -4 12 17.98 27.26
 -14 -4 -12 -5.96 20.32
 14 4 -12 2.21 3.42
 -14 4 -12 14.52 42.76
 -14 -4 12 10.26 23.97
 14 -4 13 5.2 25.68
 14 4 -13 -0.63 2.14
 -14 -4 -13 -4.03 19.87
 -14 4 -13 1.4 40.92
 -14 -4 13 13.19 23.61
 14 -4 14 43.66 47.62
 -14 -4 -14 3.76 23.79
 -14 -4 14 8.89 28.58
 -14 4 -14 7.92 31.71
 14 -4 15 19.02 34.64
 -14 -4 15 25.12 31.69
 -14 4 -15 4.23 36.71
 14 -4 16 1.87 30.34
 -14 -4 -16 -5.99 25.27
 -14 -4 16 10.62 28.83
 -14 4 -16 -27.89 32.59
 14 -4 17 27.68 35.45
 -14 -4 -17 31.33 30.27
 -14 -4 17 17.69 34.89
 -14 4 -17 -5.13 39.03
 14 -4 18 24.22 33.4
 -14 -4 -18 13.08 28.58
 -14 -4 18 -2.59 33.87
 -14 4 -18 4.34 37.88
 14 -4 19 8.48 29.24
 -14 -4 -19 1.71 40.78
 -14 -4 19 18.52 30.02
 -14 4 -19 -30.59 34.12
 14 -4 20 5.15 55.07
 -14 -4 -20 10.98 29.37
 -14 4 20 -23.83 49.38
 -14 -4 20 37.63 57.44
 -14 4 -20 28.36 40.74
 14 -4 21 -22.3 60.23
 -14 -4 -21 31.22 32.34
 -14 4 21 23.05 33.89
 -14 -4 21 15.08 90
 -14 4 -21 19.24 46.03
 -14 4 22 -17.74 31.28
 14 -4 22 11.37 34.71
 -14 -4 -22 28.83 29.06
 -14 -4 22 4.05 53.66
 -14 4 -22 6.28 42.09
 14 -4 23 -7.74 36.01
 -14 -4 -23 38.17 49.54
 -14 4 23 23.81 35.07
 -14 -4 23 25.32 57.21
 -14 4 -23 -5.13 44.79
 14 -4 24 9.86 30.34
 -14 -4 -24 -11.84 25.75
 -14 4 24 -5.54 29.6
 -14 -4 24 28.63 48.3
 -14 4 -24 -0.79 38.49
 -15 4 0 12.94 20.08
 -15 -4 0 11.77 17.71
 -15 -4 0 -0.23 13.66
 15 -4 0 2.77 24.35
 -15 -4 -1 19.13 20.55
 -15 -4 -1 17.8 26.69
 -15 4 1 3.02 28.4
 15 -4 1 -16.29 36.71
 -15 4 -1 29.35 32.23
 -15 -4 1 -12.54 13.8
 -15 -4 1 -1.69 16.9
 15 -4 -1 16.9 23.02
 -15 -4 -2 7.94 17.96
 -15 4 2 -4.75 17.42
 15 -4 2 -12.4 25.84
 -15 4 -2 25.23 19.69
 -15 -4 2 -6.26 16.47
 15 -4 -2 -10.04 34.84
 -15 -4 2 11.61 14.9
 -15 -4 -3 1.1 20.17
 15 -4 3 20.41 27.66
 -15 4 -3 3.2 22.24
 -15 -4 3 12.06 16.72
 -15 -4 3 23.09 27.73
 15 -4 -3 9.52 24.51
 -15 -4 -4 -0.32 18.25
 15 -4 4 -5.96 25.03
 -15 4 -4 -5.4 37.47
 -15 -4 4 3.49 16.45
 -15 -4 4 16.43 15.91
 15 -4 -4 -13.41 21.72
 -15 -4 -5 8.85 32.41
 15 -4 5 -21.29 41.55
 -15 4 -5 -1.26 27.57
 -15 -4 5 1.31 18.46
 -15 -4 5 19.06 17.71
 15 -4 -5 46.27 38.98
 -15 -4 -6 5.13 20.5
 15 -4 6 -7.58 27.84
 -15 4 -6 38.37 29.93
 -15 -4 6 25.93 17.71
 -15 -4 6 3.38 20.39
 15 -4 -6 -1.51 26.22
 -15 -4 -7 -10.62 20.53
 15 -4 7 7.36 27.21
 -15 4 -7 -14 47.02
 -15 -4 7 20.23 20.93
 -15 -4 7 1.1 25.41
 15 -4 -7 33.98 24.98
 -15 -4 -8 5.94 22.26
 15 -4 8 25.21 44.79
 -15 4 -8 21.56 29.6
 -15 -4 8 14.79 22.6
 -15 -4 8 11.28 28.52
 15 -4 -8 16.9 42.22
 -15 -4 -9 11.3 34.34
 15 -4 9 8.96 30.23
 15 -4 -9 12.04 25.45
 -15 4 -9 6.17 29.17
 -15 -4 9 9.41 22.57
 -15 -4 9 7.83 17.17
 -15 -4 -10 25.93 22.84
 15 -4 10 34.16 32.59
 -15 4 -10 -1.91 31.69
 -15 -4 10 -0.77 17.51
 -15 -4 10 18.95 25.45
 15 -4 -10 20.55 27.5
 -15 -4 -11 3.08 20.01
 15 -4 11 -7.34 26.96
 -15 4 -11 -13.12 26.81
 -15 -4 11 27.8 33.62
 -15 -4 11 -2.32 14.43
 15 -4 -11 10.11 26.56
 -15 -4 -12 -0.02 22.66
 15 -4 12 9.41 30.16
 -15 4 -12 21.7 48.59
 15 -4 13 12.36 48.91
 -15 -4 -13 -1.78 36.8
 -15 -4 13 22.53 43.33
 -15 4 -13 -7.76 50.05
 15 -4 14 11.05 34.89
 -15 -4 -14 49.38 42.76
 -15 -4 14 -9.07 32
 -15 4 -14 20.8 35.18
 15 -4 15 29.48 35.09
 -15 -4 -15 10.53 28.38
 -15 -4 15 3.02 31.58
[truncated: 170,907 more chars]
