# Supplementary material for: Synthesis of C70-fragment buckybowls bearing alkoxy substituents
Source: Beilstein J Org Chem. 2020 Apr 15;16:681–90. doi: 10.3762/bjoc.16.66 (PMC7176931; doi:10.3762/bjoc.16.66)
Supplement: File 1 — CIF files of compounds 5a–c. [file Beilstein_J_Org_Chem-16-681-s001.zip › Dioxole-5b.cif]

data_Dioxole5b
_audit_creation_date               2020-01-29
_audit_creation_method
;
Olex2 1.2
(compiled 2018.05.29 svn.r3508 for OlexSys, GUI svn.r5506)
;
_shelx_SHELXL_version_number       '2018/3'
_audit_contact_author_address      ?
_audit_contact_author_email        ?
_audit_contact_author_name         ''
_audit_contact_author_phone        ?
_publ_contact_author_id_orcid      ?
_publ_section_references
;
Dolomanov, O.V., Bourhis, L.J., Gildea, R.J, Howard, J.A.K. & Puschmann, H.
 (2009), J. Appl. Cryst. 42, 339-341.

Sheldrick, G.M. (2015). Acta Cryst. A71, 3-8.

Sheldrick, G.M. (2015). Acta Cryst. C71, 3-8.
;
_chemical_name_common              ?
_chemical_name_systematic          ?
_chemical_formula_moiety           'C14.5 H7 O'
_chemical_formula_sum              'C14.50 H7 O'
_chemical_formula_weight           197.20
_chemical_melting_point            ?
loop_
  _atom_type_symbol
  _atom_type_description
  _atom_type_scat_dispersion_real
  _atom_type_scat_dispersion_imag
  _atom_type_scat_source
 'C' 'C' 0.0033 0.0016 'International Tables Vol C Tables 4.2.6.8 and 6.1.1.4'
 'H' 'H' 0.0000 0.0000 'International Tables Vol C Tables 4.2.6.8 and 6.1.1.4'
 'O' 'O' 0.0106 0.0060 'International Tables Vol C Tables 4.2.6.8 and 6.1.1.4'

_shelx_space_group_comment
;
The symmetry employed for this shelxl refinement is uniquely defined
by the following loop, which should always be used as a source of
symmetry information in preference to the above space-group names.
They are only intended as comments.
;
_space_group_crystal_system        'monoclinic'
_space_group_IT_number             11
_space_group_name_H-M_alt          'P 1 21/m 1'
_space_group_name_Hall             '-P 2yb'
loop_
  _space_group_symop_operation_xyz
 'x, y, z'
 '-x, y+1/2, -z'
 '-x, -y, -z'
 'x, -y-1/2, z'

_cell_length_a                     3.7712(7)
_cell_length_b                     15.097(3)
_cell_length_c                     14.845(3)
_cell_angle_alpha                  90
_cell_angle_beta                   90.85(3)
_cell_angle_gamma                  90
_cell_volume                       845.1(3)
_cell_formula_units_Z              4
_cell_measurement_reflns_used      28392
_cell_measurement_temperature      150(2)
_cell_measurement_theta_max        30.033
_cell_measurement_theta_min        1.924
_shelx_estimated_absorpt_T_max     ?
_shelx_estimated_absorpt_T_min     ?
_exptl_absorpt_coefficient_mu      0.096
_exptl_absorpt_correction_T_max    ?
_exptl_absorpt_correction_T_min    ?
_exptl_absorpt_correction_type     none
_exptl_absorpt_process_details     ?
_exptl_absorpt_special_details     ?
_exptl_crystal_colour              orange
_exptl_crystal_density_diffrn      1.550
_exptl_crystal_density_meas        ?
_exptl_crystal_density_method      ?
_exptl_crystal_description         block
_exptl_crystal_F_000               408
_exptl_crystal_size_max            0.18
_exptl_crystal_size_mid            0.03
_exptl_crystal_size_min            0.03
_exptl_transmission_factor_max     ?
_exptl_transmission_factor_min     ?
_diffrn_reflns_av_R_equivalents    0.0393
_diffrn_reflns_av_unetI/netI       0.0229
_diffrn_reflns_Laue_measured_fraction_full  0.989
_diffrn_reflns_Laue_measured_fraction_max  0.959
_diffrn_reflns_limit_h_max         5
_diffrn_reflns_limit_h_min         -5
_diffrn_reflns_limit_k_max         21
_diffrn_reflns_limit_k_min         -21
_diffrn_reflns_limit_l_max         20
_diffrn_reflns_limit_l_min         -20
_diffrn_reflns_number              14421
_diffrn_reflns_point_group_measured_fraction_full  0.989
_diffrn_reflns_point_group_measured_fraction_max  0.959
_diffrn_reflns_theta_full          25.242
_diffrn_reflns_theta_max           30.033
_diffrn_reflns_theta_min           1.924
_diffrn_ambient_temperature        150(2)
_diffrn_detector_area_resol_mean   ?
_diffrn_measured_fraction_theta_full  0.989
_diffrn_measured_fraction_theta_max  0.959
_diffrn_measurement_device_type    'ADSC Q210 CCD area detector'
_diffrn_measurement_method         'omega scan'
_diffrn_radiation_monochromator    'Si(111) double crystal monochromator'
_diffrn_radiation_type             synchrotron
_diffrn_radiation_wavelength       0.700
_diffrn_source                     'PLSII 2D bending magnet'
_reflns_Friedel_coverage           0.000
_reflns_Friedel_fraction_full      .
_reflns_Friedel_fraction_max       .
_reflns_number_gt                  2296
_reflns_number_total               2458
_reflns_special_details
;
 Reflections were merged by SHELXL according to the crystal
 class for the calculation of statistics and refinement.
 
 _reflns_Friedel_fraction is defined as the number of unique
 Friedel pairs measured divided by the number that would be
 possible theoretically, ignoring centric projections and
 systematic absences.
;
_reflns_threshold_expression       'I > 2\s(I)'
_computing_cell_refinement         'HKL3000 (Minor et al., 2006)'
_computing_data_collection         'HKL3000 (Minor et al., 2006)'
_computing_data_reduction          'HKL3000 (Minor et al., 2006)'
_computing_molecular_graphics      'Olex2 (Dolomanov et al., 2009)'
_computing_publication_material    'Olex2 (Dolomanov et al., 2009)'
_computing_structure_refinement    'ShelXL (Sheldrick, 2015)'
_computing_structure_solution      'ShelXT (Sheldrick, 2015)'
_refine_diff_density_max           0.545
_refine_diff_density_min           -0.491
_refine_diff_density_rms           0.128
_refine_ls_extinction_coef         .
_refine_ls_extinction_method       none
_refine_ls_goodness_of_fit_ref     1.153
_refine_ls_hydrogen_treatment      constr
_refine_ls_matrix_type             full
_refine_ls_number_parameters       166
_refine_ls_number_reflns           2458
_refine_ls_number_restraints       0
_refine_ls_R_factor_all            0.0740
_refine_ls_R_factor_gt             0.0718
_refine_ls_restrained_S_all        1.153
_refine_ls_shift/su_max            0.000
_refine_ls_shift/su_mean           0.000
_refine_ls_structure_factor_coef   Fsqd
_refine_ls_weighting_details      
 'w=1/[\s^2^(Fo^2^)+(0.1014P)^2^+2.3168P] where P=(Fo^2^+2Fc^2^)/3'
_refine_ls_weighting_scheme        calc
_refine_ls_wR_factor_gt            0.2346
_refine_ls_wR_factor_ref           0.2360
_refine_special_details            ?
_olex2_refinement_description
;
1. Fixed Uiso
 At 1.2 times of:
  All C(H) groups, All C(H,H) groups, All C(H,H,H) groups
2. Others
 Fixed Sof: H9A(0.5) H9BA(0.5) H9BB(0.5) H6B(0.5) H6AA(0.5) H6AB(0.5) C8B(0.5)
 H8B(0.5) C7A(0.5) H7A(0.5) C8A(0.5) C7B(0.5)
3.a Secondary CH2 refined with riding coordinates:
 C17(H17A,H17B), C9(H9BA,H9BB), C6(H6AA,H6AB)
3.b Aromatic/amide H refined with riding coordinates:
 C11(H11), C15(H15), C9(H9A), C6(H6B), C8B(H8B), C7A(H7A)
;
_atom_sites_solution_hydrogens     geom
_atom_sites_solution_primary       dual
_atom_sites_solution_secondary     ?
loop_
  _atom_site_label
  _atom_site_type_symbol
  _atom_site_fract_x
  _atom_site_fract_y
  _atom_site_fract_z
  _atom_site_U_iso_or_equiv
  _atom_site_adp_type
  _atom_site_occupancy
  _atom_site_site_symmetry_order
  _atom_site_calc_flag
  _atom_site_refinement_flags_posn
  _atom_site_refinement_flags_adp
  _atom_site_refinement_flags_occupancy
  _atom_site_disorder_assembly
  _atom_site_disorder_group
 O1 O 0.5281(5) 0.67332(12) 0.77167(11) 0.0162(4) Uani 1 1 d . . . . .
 C12 C 0.0607(6) 0.67133(14) 0.45090(15) 0.0112(4) Uani 1 1 d . . . . .
 C10 C -0.0124(6) 0.58983(15) 0.30966(15) 0.0123(4) Uani 1 1 d . . . . .
 C14 C 0.1952(6) 0.70249(14) 0.53923(14) 0.0116(4) Uani 1 1 d . . . . .
 C11 C 0.0780(6) 0.59146(15) 0.40405(15) 0.0128(4) Uani 1 1 d . . . . .
 H11 H 0.147223 0.539793 0.433542 0.015 Uiso 1 1 calc R . . . .
 C2 C -0.1388(6) 0.66824(15) 0.26914(15) 0.0122(4) Uani 1 1 d . . . . .
 C3 C -0.1283(6) 0.66930(17) 0.17465(16) 0.0163(5) Uani 1 1 d . . . . .
 C1 C -0.1485(8) 0.750000 0.3159(2) 0.0106(6) Uani 1 2 d S T P . .
 C13 C -0.0429(8) 0.750000 0.4047(2) 0.0108(6) Uani 1 2 d S T P . .
 C16 C 0.4236(6) 0.70380(15) 0.68752(14) 0.0127(4) Uani 1 1 d . . . . .
 C15 C 0.3127(6) 0.65421(15) 0.61453(14) 0.0128(4) Uani 1 1 d . . . . .
 H15 H 0.315673 0.592618 0.615184 0.015 Uiso 1 1 calc R . . . .
 C17 C 0.6722(9) 0.750000 0.8160(2) 0.0155(6) Uani 1 2 d S T P . .
 H17A H 0.928807 0.750000 0.812172 0.019 Uiso 1 2 calc RS T P . .
 H17B H 0.608656 0.750000 0.879027 0.019 Uiso 1 2 calc RS T P . .
 C5 C 0.0252(9) 0.750000 0.0425(2) 0.0163(6) Uani 1 2 d S T P E .
 C4 C -0.1240(9) 0.750000 0.1282(2) 0.0213(8) Uani 1 2 d S T P E .
 C9 C 0.0759(7) 0.52286(16) 0.2405(2) 0.0214(5) Uani 1 1 d . . . . .
 H9A H 0.113529 0.465851 0.262382 0.026 Uiso 0.5 1 calc R . . A 1
 H9BA H -0.081233 0.472075 0.242853 0.026 Uiso 0.5 1 calc R . . B 2
 H9BB H 0.320006 0.503157 0.246294 0.026 Uiso 0.5 1 calc R . . B 2
 C6 C 0.1146(8) 0.65957(18) 0.0153(2) 0.0239(6) Uani 1 1 d . . . . .
 H6B H 0.174472 0.655062 -0.045096 0.029 Uiso 0.5 1 calc R . . C 2
 H6AA H 0.362682 0.653022 0.000277 0.029 Uiso 0.5 1 calc R . . D 1
 H6AB H -0.034654 0.638138 -0.033835 0.029 Uiso 0.5 1 calc R . . D 1
 C8B C 0.1081(13) 0.5316(3) 0.1556(3) 0.0142(8) Uani 0.5 1 d . . . E 1
 H8B H 0.192192 0.485032 0.120868 0.017 Uiso 0.5 1 calc R . . E 1
 C7A C 0.1281(12) 0.5830(3) 0.0584(3) 0.0142(8) Uani 0.5 1 d . . . E 2
 H7A H 0.212543 0.531953 0.030926 0.017 Uiso 0.5 1 calc R . . E 2
 C8A C 0.0092(13) 0.5822(4) 0.1476(4) 0.0123(9) Uani 0.5 1 d . . . E 2
 C7B C 0.0150(13) 0.6123(4) 0.1155(4) 0.0134(9) Uani 0.5 1 d . . . E 1

loop_
  _atom_site_aniso_label
  _atom_site_aniso_U_11
  _atom_site_aniso_U_22
  _atom_site_aniso_U_33
  _atom_site_aniso_U_23
  _atom_site_aniso_U_13
  _atom_site_aniso_U_12
 O1 0.0221(8) 0.0167(8) 0.0097(8) 0.0014(6) -0.0037(6) 0.0013(6)
 C12 0.0119(9) 0.0119(9) 0.0099(9) 0.0016(7) 0.0003(7) -0.0012(7)
 C10 0.0130(9) 0.0114(9) 0.0124(10) -0.0006(7) -0.0005(7) -0.0019(7)
 C14 0.0120(9) 0.0131(10) 0.0096(10) 0.0008(7) 0.0009(7) -0.0006(7)
 C11 0.0142(9) 0.0120(9) 0.0121(10) 0.0021(7) -0.0004(8) -0.0015(7)
 C2 0.0107(9) 0.0121(9) 0.0137(10) -0.0014(7) -0.0021(7) -0.0007(7)
 C3 0.0119(9) 0.0242(12) 0.0128(10) -0.0056(8) -0.0031(8) 0.0009(8)
 C1 0.0096(12) 0.0120(13) 0.0102(13) 0.000 -0.0003(10) 0.000
 C13 0.0110(12) 0.0121(13) 0.0093(13) 0.000 0.0005(10) 0.000
 C16 0.0127(9) 0.0174(11) 0.0079(10) 0.0016(7) -0.0004(7) 0.0012(7)
 C15 0.0153(10) 0.0121(9) 0.0110(10) 0.0010(7) 0.0010(8) 0.0004(7)
 C17 0.0155(14) 0.0193(15) 0.0115(14) 0.000 -0.0032(11) 0.000
 C5 0.0154(14) 0.0235(16) 0.0100(14) 0.000 -0.0024(11) 0.000
 C4 0.0109(13) 0.044(2) 0.0092(14) 0.000 -0.0031(11) 0.000
 C9 0.0206(11) 0.0101(10) 0.0338(14) -0.0039(9) 0.0057(10) -0.0026(8)
 C6 0.0264(12) 0.0174(12) 0.0276(13) -0.0085(10) -0.0122(11) 0.0032(9)
 C8B 0.018(2) 0.009(2) 0.015(2) -0.0022(16) -0.0018(16) 0.0004(17)
 C7A 0.018(2) 0.015(2) 0.0101(19) -0.0018(15) 0.0004(16) -0.0017(16)
 C8A 0.015(2) 0.011(3) 0.011(2) 0.0006(19) -0.0049(17) -0.0015(19)
 C7B 0.013(2) 0.014(2) 0.013(2) -0.002(2) -0.0056(18) -0.0002(17)

_geom_special_details
;
 All esds (except the esd in the dihedral angle between two l.s. planes)
 are estimated using the full covariance matrix.  The cell esds are taken
 into account individually in the estimation of esds in distances, angles
 and torsion angles; correlations between esds in cell parameters are only
 used when they are defined by crystal symmetry.  An approximate (isotropic)
 treatment of cell esds is used for estimating esds involving l.s. planes.
;
loop_
  _geom_bond_atom_site_label_1
  _geom_bond_atom_site_label_2
  _geom_bond_distance
  _geom_bond_site_symmetry_2
  _geom_bond_publ_flag
 O1 C16 1.383(3) . ?
 O1 C17 1.434(3) . ?
 C12 C14 1.476(3) . ?
 C12 C11 1.394(3) . ?
 C12 C13 1.423(3) . ?
 C10 C11 1.437(3) . ?
 C10 C2 1.408(3) . ?
 C10 C9 1.482(3) . ?
 C14 C14 1.435(4) 4_575 ?
 C14 C15 1.401(3) . ?
 C2 C3 1.404(3) . ?
 C2 C1 1.417(3) . ?
 C3 C4 1.401(3) . ?
 C3 C8A 1.472(6) . ?
 C3 C7B 1.348(5) . ?
 C1 C13 1.372(4) . ?
 C16 C16 1.395(5) 4_575 ?
 C16 C15 1.377(3) . ?
 C5 C4 1.398(5) . ?
 C5 C6 1.464(3) 4_575 ?
 C5 C6 1.464(3) . ?
 C9 C8B 1.275(5) . ?
 C9 C8A 1.660(7) . ?
 C6 C7A 1.323(5) . ?
 C6 C7B 1.697(8) . ?
 C8B C7B 1.399(8) . ?
 C7A C8A 1.405(7) . ?

loop_
  _geom_angle_atom_site_label_1
  _geom_angle_atom_site_label_2
  _geom_angle_atom_site_label_3
  _geom_angle
  _geom_angle_site_symmetry_1
  _geom_angle_site_symmetry_3
  _geom_angle_publ_flag
 C16 O1 C17 104.27(19) . . ?
 C11 C12 C14 134.5(2) . . ?
 C11 C12 C13 119.8(2) . . ?
 C13 C12 C14 104.48(19) . . ?
 C11 C10 C9 129.4(2) . . ?
 C2 C10 C11 118.4(2) . . ?
 C2 C10 C9 110.8(2) . . ?
 C14 C14 C12 108.58(12) 4_575 . ?
 C15 C14 C12 130.1(2) . . ?
 C15 C14 C14 121.35(13) . 4_575 ?
 C12 C11 C10 119.3(2) . . ?
 C10 C2 C1 122.3(2) . . ?
 C3 C2 C10 115.0(2) . . ?
 C3 C2 C1 118.8(2) . . ?
 C2 C3 C8A 106.1(3) . . ?
 C4 C3 C2 120.2(2) . . ?
 C4 C3 C8A 129.5(3) . . ?
 C7B C3 C2 131.4(4) . . ?
 C7B C3 C4 103.1(4) . . ?
 C2 C1 C2 121.2(3) 4_575 . ?
 C13 C1 C2 117.51(15) . . ?
 C13 C1 C2 117.51(15) . 4_575 ?
 C12 C13 C12 113.2(3) 4_575 . ?
 C1 C13 C12 122.45(14) . 4_575 ?
 C1 C13 C12 122.45(14) . . ?
 O1 C16 C16 109.43(12) . 4_575 ?
 C15 C16 O1 127.5(2) . . ?
 C15 C16 C16 122.94(13) . 4_575 ?
 C16 C15 C14 115.7(2) . . ?
 O1 C17 O1 107.6(3) . 4_575 ?
 C4 C5 C6 110.38(17) . 4_575 ?
 C4 C5 C6 110.39(18) . . ?
 C6 C5 C6 137.6(4) . 4_575 ?
 C3 C4 C3 120.9(3) . 4_575 ?
 C5 C4 C3 117.13(17) . . ?
 C5 C4 C3 117.13(17) . 4_575 ?
 C10 C9 C8A 100.1(2) . . ?
 C8B C9 C10 129.8(3) . . ?
 C5 C6 C7B 95.5(3) . . ?
 C7A C6 C5 133.5(3) . . ?
 C9 C8B C7B 118.9(4) . . ?
 C6 C7A C8A 117.0(4) . . ?
 C3 C8A C9 107.8(3) . . ?
 C7A C8A C3 111.6(5) . . ?
 C7A C8A C9 137.8(4) . . ?
 C3 C7B C6 113.5(5) . . ?
 C3 C7B C8B 112.3(5) . . ?
 C8B C7B C6 133.0(4) . . ?

loop_
  _refln_index_h
  _refln_index_k
  _refln_index_l
  _refln_F_squared_meas
  _refln_F_squared_sigma
 0 0 -2 778.47 26.77
 0 0 2 900.42 26.98
 0 0 2 921.31 26.89
 0 0 -3 0.91 0.13
 0 0 -3 0.79 0.12
 0 0 3 0.68 0.08
 0 0 3 0.93 0.12
 0 0 -4 197.28 6.26
 0 0 -4 204.76 6.17
 0 0 4 174.52 6.2
 0 0 4 206.14 6.02
 0 0 -5 516.07 15.7
 0 0 -5 480.38 15.69
 0 0 5 498.98 15.56
 0 0 -6 39.01 1.46
 0 0 -6 39.51 1.36
 0 0 6 40.86 1.4
 0 0 6 42.39 1.34
 0 0 -7 667.09 20.86
 0 0 -7 662.84 21.13
 0 0 7 607 21.36
 0 0 7 720.54 20.96
 0 0 -8 26.91 1.03
 0 0 -8 26.47 1.13
 0 0 8 28.8 1.06
 0 0 8 27.6 0.96
 0 0 -9 8.73 0.46
 0 0 -9 9.76 0.51
 0 0 9 9.62 0.44
 0 0 9 10.38 0.44
 0 0 -10 2.75 0.28
 0 0 -10 2.6 0.24
 0 0 10 2.63 0.2
 0 0 10 2.99 0.27
 0 0 -11 277.39 9.36
 0 0 -11 294.79 9.5
 0 0 11 296.36 9.38
 0 0 11 300.85 9.24
 0 0 -12 40.81 1.76
 0 0 -12 39.03 1.35
 0 0 12 39.96 1.5
 0 0 12 43.53 1.54
 0 0 -13 650.24 20.42
 0 0 -13 637.96 20.6
 0 0 13 626.52 20.37
 0 0 13 681.14 20.57
 0 0 -14 546.7 17.56
 0 0 -14 546.84 17.49
 0 0 14 549.83 17.84
 0 0 14 586.11 17.48
 0 0 -15 0.43 0.36
 0 0 -15 0.32 0.59
 0 0 15 0.23 0.38
 0 0 15 0.2 0.43
 0 0 -16 21.66 0.95
 0 0 -16 22.13 1.27
 0 0 16 23.83 1.18
 0 0 -17 30.81 1.13
 0 0 -17 28.43 1.49
 0 0 17 22.39 1.23
 0 0 17 26.25 1.45
 0 0 -18 30.12 1.42
 0 0 -19 1.14 0.75
 0 0 -20 0.16 0.77
 0 0 20 -0.38 0.85
 0 1 0 -0.18 0.14
 0 1 1 258.31 8.36
 0 -1 1 257.96 8.75
 0 -1 -1 276.93 8.42
 0 -1 -1 267.07 8.41
 0 1 -2 318.28 9.24
 0 1 -2 282.69 9.03
 0 1 2 263.48 9.01
 0 -1 2 293.44 9.26
 0 1 -3 688.07 22.27
 0 1 3 702.67 22.5
 0 -1 3 651.92 21.85
 0 -1 -3 748.68 22.58
 0 -1 -3 733.38 21.94
 0 1 -4 190.82 6.12
 0 1 -4 187.38 5.92
 0 1 4 185.31 5.89
 0 1 4 198.32 6.07
 0 -1 4 179.84 5.93
 0 -1 4 188.81 5.95
 0 -1 -4 193.16 6.1
 0 -1 -4 199.87 6.09
 0 1 -5 2.15 0.18
 0 1 -5 1.99 0.16
 0 1 5 1.83 0.13
 0 1 5 1.85 0.17
 0 -1 5 1.95 0.15
 0 -1 5 2.25 0.2
 0 -1 -5 1.97 0.17
 0 -1 -5 1.78 0.18
 0 1 -6 381.34 11.93
 0 1 -6 375.49 11.62
 0 1 6 348.82 11.42
 0 1 6 358.39 11.77
 0 -1 6 372.02 11.67
 0 -1 6 394.76 11.75
 0 -1 -6 342.03 11.72
 0 -1 -6 390.39 11.63
 0 1 -7 64.68 2.18
 0 1 -7 62.94 2.11
 0 1 7 61.48 2.07
 0 1 7 64.67 2.12
 0 -1 7 62.99 2.07
 0 -1 7 64.2 2.07
 0 -1 -7 64.82 2.23
 0 -1 -7 62.99 2.18
 0 1 -8 976.06 32.11
 0 1 -8 951.71 32.59
 0 1 8 922.53 32.21
 0 1 8 1136.12 32.62
 0 -1 8 978.74 32.19
 0 -1 8 1056.06 31.79
 0 -1 -8 1098.86 32.16
 0 -1 -8 1110.4 32.93
 0 1 -9 1.74 0.2
 0 1 -9 1.78 0.22
 0 1 9 1.93 0.19
 0 1 9 2.1 0.22
 0 -1 9 1.64 0.16
 0 -1 9 2.12 0.21
 0 -1 -9 1.95 0.23
 0 -1 -9 1.64 0.24
 0 1 -10 7.93 0.4
 0 1 -10 6.86 0.38
 0 1 10 6.9 0.36
 0 1 10 8.31 0.38
 0 -1 10 6.47 0.37
 0 -1 10 8.19 0.4
 0 -1 -10 7.64 0.4
 0 -1 -10 7.04 0.36
 0 1 -11 43.05 1.57
 0 1 -11 39.88 1.53
 0 1 11 37.69 1.6
 0 1 11 43.13 1.5
 0 -1 11 40.18 1.48
 0 -1 11 44.3 1.46
 0 -1 -11 42.02 1.59
 0 -1 -11 39.53 1.57
 0 1 -12 222.44 7.18
 0 1 -12 232.09 7.28
 0 1 12 188.71 7.09
 0 1 12 219.18 7.17
 0 -1 12 209.79 7.22
 0 -1 12 235.98 7.31
 0 -1 -12 212.27 7.24
 0 -1 -12 217.15 7.26
 0 1 -13 17.16 0.94
 0 1 -13 14.08 0.7
 0 -1 13 15.63 0.73
 0 -1 13 13.63 0.82
 0 1 -14 123.4 4.15
 0 1 -14 129.86 4.53
 0 1 14 125.17 4.39
 0 1 14 142.07 4.91
 0 -1 14 131.96 4.21
 0 -1 14 135.31 4.62
 0 -1 -14 139.8 4.63
 0 -1 -14 131.56 4.11
 0 1 -15 3.3 0.37
 0 1 -15 4.09 0.53
 0 1 15 3.28 0.3
 0 1 15 3.2 0.29
 0 -1 15 2.8 0.31
 0 -1 15 3.14 0.39
 0 -1 -15 4.13 0.42
 0 -1 -15 3.54 0.29
 0 1 -16 6.69 0.44
 0 1 -16 5.84 0.42
 0 1 16 6.07 0.43
 0 1 16 5.63 0.44
 0 -1 16 5.45 0.44
 0 -1 16 5.89 0.44
 0 -1 -16 4.42 0.41
 0 1 -17 0.22 0.41
 0 1 -17 -0.13 0.24
 0 1 17 0.58 0.29
 0 -1 17 0.69 0.47
 0 -1 -17 0.84 0.28
 0 -1 -17 0.25 0.3
 0 -1 -18 0.91 0.36
 0 1 -19 0.99 0.73
 0 -1 19 0.92 0.78
 0 -1 -19 0.23 0.55
 0 1 -20 50.28 2.14
 0 1 20 53.2 2.03
 0 -1 20 46.62 2
 0 -1 -20 39.23 2.27
 0 2 1 175.64 5.06
 0 2 1 168.7 4.98
 0 -2 1 154.05 5.48
 0 -2 -1 154.6 5.13
 0 -2 -1 139.68 5.03
 0 2 -2 85.53 2.66
 0 2 -2 80 2.59
 0 2 2 77.54 2.5
 0 2 2 82.23 2.59
 0 -2 2 80.8 2.53
 0 -2 2 82.69 2.81
 0 -2 -2 74.14 2.53
 0 -2 -2 76.5 2.47
 0 2 -3 2.98 0.36
 0 2 -3 1.77 0.17
 0 2 3 2 0.16
 0 2 3 1.81 0.22
 0 -2 3 2.27 0.21
 0 -2 -3 1.86 0.16
 0 -2 -3 1.96 0.14
 0 2 4 109.21 3.51
 0 2 4 110.15 3.51
 0 -2 -4 110.78 3.51
 0 -2 -4 111.27 3.66
 0 2 -5 8.75 0.44
 0 2 -5 10.63 0.45
 0 2 5 8.25 0.37
 0 -2 5 9.06 0.38
 0 -2 5 9.85 0.45
 0 -2 -5 8.93 0.37
 0 -2 -5 7.88 0.41
 0 2 -6 221.21 7.28
 0 2 -6 217.48 7.34
 0 2 6 230.8 7.06
 0 -2 6 216.07 7.19
 0 -2 6 227.49 7.17
 0 -2 -6 257.15 7.37
 0 -2 -6 234.09 7.3
 0 2 -7 34.31 1.33
 0 2 -7 33.72 1.3
 0 2 7 31.81 1.08
 0 2 7 35.64 1.18
 0 -2 7 34.42 1.18
 0 -2 7 33.99 1.28
 0 -2 -7 31.08 1.21
 0 2 -8 236.45 7.63
 0 2 -8 236.13 7.49
 0 2 8 226.36 7.3
 0 2 8 241.16 7.4
 0 -2 8 236.07 7.4
 0 -2 8 238.74 7.63
 0 -2 -8 232.95 7.57
 0 -2 -8 228.82 7.62
 0 2 -9 83.27 2.84
 0 2 -9 76.76 2.57
 0 2 9 74.49 2.6
 0 2 9 75.87 2.52
 0 -2 9 81.17 2.69
 0 -2 9 82.9 2.78
 0 -2 -9 76.86 2.62
 0 -2 -9 71.12 2.75
 0 2 -10 26.05 1.06
 0 2 -10 25.89 0.96
 0 2 10 26.2 1
 0 2 10 27.15 0.92
 0 -2 10 26.98 1.04
 0 -2 10 29.35 1.1
 0 -2 -10 26.8 1.03
 0 -2 -10 27.22 1.1
 0 2 -11 32.78 1.28
 0 -2 11 30.44 1.11
 0 -2 11 28.5 1.18
 0 2 -12 128.62 4.36
 0 2 -12 139.92 4.59
 0 -2 12 134.58 4.56
 0 -2 12 141.47 4.58
 0 -2 -12 149.28 4.97
 0 2 -13 7.07 0.44
 0 2 -13 8.64 0.56
 0 2 13 7.73 0.39
 0 2 13 8.65 0.45
 0 -2 13 6.69 0.41
 0 -2 13 8.71 0.63
 0 -2 -13 6.92 0.39
 0 -2 -13 6.99 0.42
 0 2 -14 169.69 5.92
 0 2 -14 172.16 5.77
 0 2 14 167.84 5.77
 0 2 14 177.63 5.58
 0 -2 14 157.46 5.6
 0 -2 14 177.73 5.73
 0 -2 -14 177.64 5.61
 0 -2 -14 180.14 6.19
 0 2 -15 13.17 0.67
 0 2 -15 13.18 1.11
 0 2 15 13.21 0.53
 0 2 15 14.56 0.61
 0 -2 15 13.25 0.66
 0 -2 15 12.23 0.74
 0 -2 -15 13.74 0.66
 0 -2 -15 11.76 0.68
 0 2 -16 9.74 0.89
 0 2 -16 8.25 0.56
 0 2 16 8.18 0.44
 0 -2 16 9.28 0.74
 0 -2 16 7.84 0.65
 0 -2 -16 8.1 0.58
 0 2 -17 0.17 0.39
 0 -2 17 0.28 0.43
 0 -2 -17 0.32 0.42
 0 -2 -18 7.03 0.55
 0 -2 -18 7 0.66
 0 2 -19 6.29 0.89
 0 -2 19 8.45 0.85
 0 -2 -19 4.84 0.64
 0 2 -20 52.37 2.95
 0 2 -20 48.37 2.25
 0 2 20 51.15 2.31
 0 -2 20 58.35 2.2
 0 -2 -20 62.98 2.38
 0 3 0 0.07 0.17
 0 3 0 0.02 0.13
 0 -3 0 0.21 0.13
 0 -3 0 0.34 0.15
 0 3 1 1060.86 32.69
 0 3 1 1091.08 33.25
 0 -3 -1 966.68 33.06
 0 3 -2 4.84 0.31
 0 3 -2 5.89 0.35
 0 3 2 4.24 0.23
 0 -3 2 4.33 0.22
 0 -3 2 5.02 0.28
 0 -3 -2 4.46 0.24
 0 3 -3 2.87 0.24
 0 3 -3 2.79 0.21
 0 3 3 2.66 0.22
 0 3 3 2.74 0.2
 0 -3 3 2.68 0.19
 0 -3 3 3.17 0.27
 0 -3 -3 2.91 0.18
 0 -3 -3 2.82 0.2
 0 3 -4 47.56 1.57
 0 3 -4 42.05 1.52
 0 3 4 46.08 1.52
 0 3 4 44.91 1.56
 0 -3 4 46.4 1.45
 0 -3 4 50.23 1.59
 0 -3 -4 41.96 1.48
 0 -3 -4 43.48 1.46
 0 3 -5 2.77 0.39
 0 3 -5 3.21 0.27
 0 3 5 2.86 0.17
 0 3 5 3.54 0.23
 0 -3 5 3.09 0.18
 0 -3 5 3.29 0.24
 0 -3 -5 3.21 0.19
 0 -3 -5 3.59 0.22
 0 3 -6 249.13 7.03
 0 3 -6 244.51 7.18
 0 3 6 203.41 6.89
 0 3 6 205.24 6.97
 0 -3 6 229.67 7.16
 0 -3 6 246.01 7.1
 0 -3 -6 207.9 7.1
 0 -3 -6 197.48 6.93
 0 3 -7 189.84 6.05
 0 3 -7 193.91 6.21
 0 3 7 182.06 5.89
 0 3 7 194.08 6.14
 0 -3 7 184.55 6.05
 0 -3 7 180.31 6.14
 0 -3 -7 188.19 5.93
 0 -3 -7 180.52 6.07
 0 3 -8 1.62 0.21
 0 3 -8 2.32 0.3
 0 3 8 2.12 0.16
 0 3 8 2.1 0.18
 0 -3 8 1.96 0.2
 0 -3 8 2.36 0.22
 0 -3 -8 2 0.17
 0 -3 -8 2.2 0.19
 0 3 -9 74 2.63
 0 3 -9 74.49 2.74
 0 3 9 76.13 2.5
 0 3 9 85.18 2.8
 0 -3 9 75.77 2.61
 0 -3 9 83.12 2.76
 0 -3 -9 82.7 2.66
 0 -3 -9 78.29 2.67
 0 3 -10 1.49 0.26
 0 3 -10 1.53 0.26
 0 3 10 1.77 0.15
 0 3 10 2.08 0.22
 0 -3 10 1.59 0.21
 0 -3 10 1.74 0.25
 0 -3 -10 1.85 0.2
 0 -3 -10 1.91 0.21
 0 3 11 0.49 0.16
 0 3 11 0.71 0.24
 0 -3 -11 0.13 0.19
 0 -3 -11 0.5 0.28
 0 3 -12 97.69 3.51
 0 3 -12 95.11 3.47
 0 3 12 98.66 3.3
 0 3 12 101.61 3.3
 0 -3 12 91.08 3.3
 0 -3 12 103.23 3.44
 0 -3 -12 107.21 3.39
 0 -3 -12 98.38 3.72
 0 3 -13 14.92 0.72
 0 3 -13 18.66 0.84
 0 3 13 17.17 0.81
 0 3 13 20.33 0.9
 0 -3 13 16.18 0.69
 0 -3 13 17.96 0.77
 0 -3 -13 19.33 0.82
 0 -3 -13 16.72 0.74
 0 3 -14 31.1 1.23
 0 3 -14 32.12 1.31
 0 -3 14 28.48 1.31
 0 -3 14 36.03 1.61
 0 -3 -14 27.15 1.3
 0 3 -15 6.75 0.52
 0 3 -15 7.81 0.57
 0 3 15 7.17 0.45
 0 -3 15 5.38 0.55
 0 -3 15 7.6 0.51
 0 -3 -15 8.23 0.63
 0 -3 -15 7.65 0.6
 0 3 -16 1.91 0.58
 0 3 16 1.75 0.23
 0 3 16 2.48 0.67
 0 -3 16 1.6 0.38
 0 -3 -16 2.66 0.45
 0 -3 -16 1.93 0.26
 0 3 -17 4.84 0.51
 0 3 17 6.38 0.71
 0 -3 17 6.54 0.81
 0 -3 -17 7.17 0.69
 0 3 -18 18.96 1.03
 0 3 18 20.8 1.3
 0 -3 18 16.72 0.9
 0 3 -19 37.02 1.74
 0 3 19 29.08 1.49
 0 -3 19 34.24 1.4
 0 3 -20 94.62 3.59
 0 -3 20 85.24 3.18
 0 -3 -20 95.11 3.16
 0 -3 -20 80.28 3.44
 0 4 0 107.69 3.56
 0 4 0 109.98 3.54
 0 -4 0 107.58 3.57
 0 -4 0 115.8 3.66
 0 4 -1 11.12 0.5
 0 4 -1 12.75 0.52
 0 4 1 9.6 0.6
 0 4 1 12.67 0.51
 0 -4 -1 12.14 0.46
 0 -4 -1 12.4 0.51
 0 4 2 186.57 6.02
 0 4 2 199.26 6.01
 0 -4 2 203.2 6.38
 0 -4 2 184.61 5.91
 0 -4 -2 168.48 6.07
 0 4 -3 374.25 12.02
 0 4 -3 370.51 12.13
 0 -4 3 381.04 11.98
 0 -4 3 382.41 11.85
 0 4 -4 23.77 0.92
 0 4 -4 22.85 0.94
 0 4 4 23.59 0.91
 0 4 4 23.23 0.81
 0 -4 4 23.26 0.89
 0 -4 4 24.22 1.03
 0 -4 -4 20.18 0.81
 0 -4 -4 22.91 0.86
 0 4 -5 150.11 4.99
 0 4 -5 147.01 4.72
 0 4 5 150.86 4.83
 0 4 5 147.7 4.96
 0 -4 5 149.13 4.83
 0 -4 5 155.71 4.76
 0 -4 -5 150.2 4.75
 0 -4 -5 156.44 4.75
 0 4 -6 33.23 1.22
 0 4 -6 33.5 1.32
 0 4 6 33.33 1.23
 0 4 6 35.33 1.23
 0 -4 6 32.05 1.12
 0 -4 6 38.18 1.43
 0 -4 -6 32.69 1.15
 0 -4 -6 33.93 1.21
 0 4 -7 13.21 0.63
 0 4 -7 15.88 0.72
 0 4 7 15.31 0.55
 0 -4 7 14 0.57
 0 -4 7 15.41 0.57
 0 -4 -7 15.79 0.62
 0 4 8 90.4 2.9
 0 4 8 93.82 3.22
 0 -4 -8 88.51 2.98
 0 -4 -8 89.22 2.98
 0 4 -9 24.7 0.87
 0 4 -9 27.71 1.05
 0 4 9 26.11 0.86
 0 4 9 26.66 1
 0 -4 9 22.73 0.92
 0 -4 9 25.75 1
 0 -4 -9 26.87 1
 0 -4 -9 27.63 1.16
 0 4 -10 78.28 2.82
 0 4 -10 88.02 3.1
 0 4 10 84.61 2.66
 0 4 10 82.15 2.89
 0 -4 10 81.23 2.7
 0 -4 10 87.23 3.05
 0 -4 -10 84.03 2.83
 0 -4 -10 83.29 2.81
 0 4 -11 53.5 1.81
 0 4 -11 58.43 2.16
 0 4 11 53.34 1.82
 0 4 11 53.54 1.94
 0 -4 11 51.5 1.82
 0 -4 11 59.81 1.98
 0 -4 -11 55.69 1.99
 0 -4 -11 56.18 1.97
 0 4 -12 2.96 0.27
 0 4 -12 2.43 0.37
 0 4 12 3.02 0.23
 0 4 12 3.22 0.34
 0 -4 12 2.9 0.29
 0 -4 12 2.95 0.35
 0 -4 -12 3.5 0.24
 0 -4 -12 3.11 0.36
 0 4 -13 23.1 1.25
 0 4 -13 17.62 1.3
 0 4 13 20.3 0.99
 0 -4 13 18.57 1.14
 0 -4 13 19.33 1.42
 0 4 -14 13.15 0.74
 0 4 -14 13.67 0.73
 0 4 14 11.52 0.57
 0 4 14 15.42 0.7
 0 -4 14 13.42 0.61
 0 -4 14 14.74 0.79
 0 -4 -14 12.89 0.55
 0 -4 -14 13.68 0.67
 0 4 -15 -0.21 0.35
 0 4 -15 0.43 0.32
 0 4 15 0.61 0.25
 0 4 15 0.41 0.34
 0 -4 15 0.59 0.21
 0 -4 15 0.13 0.32
 0 -4 -15 0.42 0.24
 0 -4 -15 0.2 0.23
 0 4 -16 2.94 0.68
 0 4 16 2.47 0.35
 0 -4 16 4.42 0.82
 0 -4 -16 3.12 0.45
 0 4 -17 3.3 0.45
 0 4 -17 2.94 0.36
 0 4 17 2.95 0.46
 0 -4 17 3.51 0.45
 0 -4 17 2.19 0.35
 0 -4 -17 2.26 0.45
 0 4 -18 119.16 3.95
 0 4 18 105.09 3.44
 0 4 18 101.72 3.85
 0 -4 18 102.33 3.88
 0 -4 -18 113.23 3.69
 0 4 -19 2.12 0.99
 0 4 19 1 0.82
 0 -4 19 1.08 0.87
 0 4 -20 1.36 0.95
 0 -4 20 1.74 0.83
 0 5 0 2.09 0.5
 0 5 0 0.92 0.42
 0 -5 0 0.52 0.36
 0 -5 0 1.11 0.4
 0 5 -1 472.76 13.91
 0 -5 1 409.81 14.07
 0 -5 1 422.56 13.73
 0 5 2 151.16 5.04
 0 5 2 157.52 5.2
 0 -5 2 163.71 5.02
 0 -5 -2 157.23 5.2
 0 -5 -2 153.11 4.81
 0 5 -3 107.03 3.75
 0 5 -3 109.22 3.9
 0 5 3 115.14 3.73
 0 5 3 112.01 3.64
 0 -5 3 111.63 3.59
 0 -5 3 115.44 3.6
 0 -5 -3 105.52 3.6
 0 -5 -3 120.09 3.75
 0 5 -4 56.19 2.01
 0 5 -4 52.09 1.91
 0 5 4 54.19 1.83
 0 5 4 58.24 1.98
 0 -5 4 54.32 1.9
 0 -5 4 60.97 2.11
 0 -5 -4 57.49 1.9
 0 -5 -4 57.88 1.92
 0 5 -5 16.14 1
 0 5 -5 14.48 0.84
 0 -5 5 16.07 0.85
 0 -5 5 16.62 1.26
 0 5 -6 420.93 12.98
 0 5 -6 428.12 13.25
 0 5 6 433.27 12.78
 0 5 6 431.9 12.93
 0 -5 6 410.44 12.93
 0 -5 6 385.07 12.92
 0 -5 -6 388.83 12.67
 0 -5 -6 383.53 12.84
 0 5 -7 603.02 17.04
 0 5 7 564 16.52
 0 5 7 511.95 16.69
 0 -5 7 501.2 17.07
 0 -5 7 532.71 17.18
 0 -5 -7 505.73 16.47
 0 -5 -7 503.51 16.52
 0 5 -8 0.26 0.31
 0 5 -8 -0.06 0.25
 0 5 8 0.22 0.15
 0 5 8 0.15 0.19
 0 -5 8 0.25 0.23
 0 -5 8 0.44 0.21
 0 -5 -8 0.26 0.21
 0 -5 -8 0.29 0.17
 0 5 -9 7.28 0.41
 0 5 -9 6.26 0.42
 0 5 9 7.87 0.34
 0 5 9 6.63 0.49
 0 -5 9 7.39 0.4
 0 -5 9 7.79 0.43
 0 -5 -9 7.85 0.41
 0 -5 -9 7.03 0.35
 0 5 -10 400.18 12.34
 0 5 -10 408.65 12.86
 0 5 10 354.01 12.67
 0 -5 10 398.75 12.59
 0 -5 10 388.71 12.28
 0 5 -11 0.31 0.27
 0 5 -11 0.21 0.32
 0 5 11 0.48 0.17
 0 5 11 1.23 0.44
 0 -5 11 0.35 0.25
 0 -5 11 -0.01 0.29
 0 -5 -11 0.64 0.26
 0 -5 -11 0.31 0.18
 0 5 -12 1202.63 36.51
 0 5 -12 1227.23 36.41
 0 5 12 1091.83 36.22
 0 5 12 1031.67 36.62
 0 -5 12 1160.82 36.47
 0 -5 12 1264.22 36.87
 0 -5 -12 1152.15 36.26
 0 -5 -12 1236.74 37.22
 0 5 -13 11.09 0.78
 0 5 -13 14.05 0.75
 0 5 13 11.29 0.49
 0 5 13 13.41 0.62
 0 -5 13 9.69 0.75
 0 -5 13 13.08 0.65
 0 -5 -13 13.8 0.58
 0 -5 -13 13.42 0.8
 0 5 -14 4 0.35
 0 5 -14 4.44 0.51
 0 5 14 4.19 0.34
 0 -5 14 4.07 0.31
 0 -5 14 5.79 0.52
 0 -5 -14 5.14 0.3
 0 5 -15 0.02 0.31
 0 5 -15 0.01 0.39
 0 5 15 -0.07 0.23
 0 -5 15 -0.13 0.29
 0 -5 15 -0.09 0.46
 0 5 -16 28.25 1.08
 0 5 -16 27.49 1.22
 0 5 16 23.53 1.08
 0 -5 16 27.85 1.13
 0 -5 16 25.64 1.31
 0 -5 -16 24.95 0.99
 0 5 -17 8.31 0.63
 0 5 -17 9.4 0.82
 0 5 17 6.09 0.55
 0 -5 17 7.45 0.7
 0 -5 17 8.81 1.01
 0 5 -18 27.39 1.46
 0 5 -18 29.8 1.49
 0 5 18 24.64 1.4
 0 -5 18 24.61 1.45
 0 -5 -18 27.31 1.59
 0 5 -19 18.29 1.38
 0 5 -19 20.74 1.62
 0 -5 19 15.6 1.23
 0 -5 19 20.75 1.29
 0 5 -20 20.53 2.23
 0 -5 20 21.75 1.55
 0 -5 -20 19.36 1.03
 0 6 0 457.57 13.54
 0 6 0 446.35 13.39
 0 -6 0 396.97 13.69
 0 6 -1 4.44 0.32
 0 6 -1 5.33 0.32
 0 6 1 4.32 0.49
 0 6 1 5.49 0.25
 0 -6 1 5.48 0.3
 0 -6 1 5.99 0.31
 0 -6 -1 5.87 0.28
 0 -6 -1 6.46 0.35
 0 6 -2 269.68 8.18
 0 6 2 235.38 7.81
 0 6 2 237.38 7.65
 0 -6 -2 234.11 7.63
 0 -6 -2 228.51 7.36
 0 6 -3 208.28 7.06
 0 6 3 211.45 6.88
 0 6 3 237.03 6.98
 0 -6 3 206.19 6.69
 0 -6 3 205.2 7.01
 0 -6 -3 227.57 6.97
 0 6 -4 1734.92 52.65
 0 6 4 1735.82 51.98
 0 6 4 1565.1 52.66
 0 -6 4 1784.59 51.86
 0 -6 -4 1510.25 52.12
 0 6 -5 533.07 15.54
 0 6 -5 517.68 15.75
 0 6 5 537.55 15.67
 0 6 5 509.74 15.81
 0 -6 5 536.43 15.65
 0 -6 5 441.37 15.9
 0 -6 -5 441.84 15.65
 0 -6 -5 492.49 15.76
 0 6 -6 95.15 3.22
 0 6 -6 92.76 3.28
 0 6 6 96.27 3.18
 0 6 6 98.4 3.37
 0 -6 6 95.91 3.24
 0 -6 6 107.24 3.47
 0 -6 -6 89.38 3.09
 0 -6 -6 96.68 3.05
 0 6 7 43.08 1.48
 0 6 7 45.4 1.61
 0 -6 -7 43.9 1.57
 0 -6 -7 40.28 1.44
 0 6 -8 387.47 12.56
 0 6 -8 387.49 12.41
 0 6 8 394.38 12.16
 0 6 8 399.68 12.67
 0 -6 8 378.76 12.16
 0 -6 8 404.23 12.66
 0 -6 -8 377.71 12.11
 0 -6 -8 385.82 12.19
 0 6 -9 155.96 4.92
 0 6 -9 152.28 5.08
 0 6 9 155.52 4.81
 0 6 9 161.15 5.14
 0 -6 9 151.92 5.11
 0 -6 9 151.58 5.05
 0 -6 -9 151.86 4.93
 0 -6 -9 161.1 5.38
 0 6 -10 247.17 7.93
 0 6 -10 258.33 8.31
 0 6 10 251.88 7.93
 0 6 10 250.97 8.17
 0 -6 10 242.93 8.06
 0 -6 10 258.64 8.37
 0 -6 -10 250.8 7.83
 0 -6 -10 249.53 8.04
 0 6 -11 630.96 20.19
 0 6 -11 628.69 20.1
 0 6 11 640.91 19.36
 0 6 11 629.92 20.08
 0 -6 11 600.05 19.51
 0 -6 11 646.51 19.66
 0 -6 -11 614.9 19.35
 0 -6 -11 657.41 20.22
 0 6 -12 7.66 0.46
 0 6 -12 8.66 0.56
 0 6 12 6.14 0.36
 0 6 12 7.03 0.45
 0 -6 12 7.62 0.42
 0 -6 -12 7.36 0.34
 0 -6 -12 5.84 0.4
 0 6 -13 113.48 3.66
 0 6 -13 110.61 3.77
 0 6 13 110.12 3.71
 0 6 13 110.56 3.93
 0 -6 13 107.88 3.62
 0 -6 13 108.18 3.72
 0 -6 -13 112.23 3.55
 0 -6 -13 119.94 4.34
 0 6 -14 0.69 0.38
 0 6 -14 0.92 0.43
 0 6 14 1.45 0.27
 0 -6 14 0.44 0.28
 0 -6 14 1.01 0.35
 0 -6 -14 1.17 0.2
 0 6 -15 70.96 2.54
 0 6 -15 70.97 2.81
 0 6 15 72.97 2.36
 0 6 15 69.67 2.48
 0 -6 15 70.41 2.72
 0 -6 15 74.47 2.63
 0 -6 -15 66.05 2.55
 0 -6 -15 72.05 2.87
 0 6 -16 15.24 0.82
 0 -6 16 14.1 0.75
 0 -6 16 14.72 0.91
 0 6 -17 30.47 1.27
 0 6 17 25.3 1.12
 0 -6 17 23.82 1.47
 0 6 -18 283.85 9.83
 0 6 -18 288.28 9.88
 0 6 18 258.9 8.61
 0 6 18 259.48 8.96
 0 -6 18 261.55 8.59
 0 -6 18 291.01 9.82
 0 -6 -18 268.07 9.03
 0 -6 -18 291.68 8.43
 0 6 -19 51.86 2.53
 0 6 -19 47.13 2.18
 0 6 19 49.21 1.85
 0 -6 19 50.39 1.88
 0 -6 19 52.57 2.36
 0 6 -20 111.25 5.05
 0 6 -20 123.64 5.26
 0 -6 20 126.63 4.44
 0 7 0 0.2 0.24
 0 7 0 0.13 0.24
 0 -7 0 0.13 0.12
 0 -7 0 -0.05 0.17
 0 7 -1 183.58 6.09
 0 7 -1 197.39 6.49
 0 7 1 181.61 6.44
 0 7 1 198.32 6.13
 0 -7 1 197.24 6.46
 0 -7 1 192.49 6.23
 0 -7 -1 188.98 6.11
 0 -7 -1 195.44 6.25
 0 7 -2 324.78 10.32
 0 7 -2 338.11 10.57
 0 7 2 329.78 10.35
 0 -7 -2 324.48 10.23
 0 7 3 290.13 9.36
 0 7 3 293.33 9.29
 0 -7 3 295.55 9.14
 0 -7 3 285.72 9.34
 0 -7 -3 288.81 9.34
 0 -7 -3 293.46 9.11
 0 7 -4 756.85 24.86
 0 7 -4 758.41 25.24
 0 -7 4 746.02 25.59
 0 -7 4 778.48 24.58
 0 7 -5 19.36 0.81
 0 7 -5 18.35 0.86
 0 7 5 18.94 0.75
 0 7 5 17.37 0.79
 0 -7 5 20.32 0.78
 0 -7 5 18.81 0.79
 0 -7 -5 19.25 0.79
 0 -7 -5 20.81 0.79
 0 7 -6 18.24 0.79
 0 7 -6 19.56 0.9
 0 7 6 20.67 0.84
 0 7 6 19.22 0.85
 0 -7 6 20.08 0.74
 0 -7 6 23.78 0.92
 0 -7 -6 18.75 0.71
 0 -7 -6 21.46 0.73
 0 7 -7 200.75 6.75
 0 7 -7 194.73 6.57
 0 7 7 206.69 6.57
 0 7 7 223.03 6.7
 0 -7 7 192.58 6.47
 0 -7 7 203.85 6.71
 0 -7 -7 209.72 6.72
 0 -7 -7 211.95 6.52
 0 7 -8 51.61 1.78
 0 7 -8 52.67 1.93
 0 7 8 52.85 1.87
 0 7 8 52.51 1.89
 0 -7 8 49.86 1.73
 0 -7 8 55.78 2.17
 0 -7 -8 47.44 1.75
 0 -7 -8 54.47 1.9
 0 7 -9 102.04 3.29
 0 7 -9 103.41 3.61
 0 7 9 101.25 3.28
 0 7 9 103.39 3.59
 0 -7 9 99.85 3.42
 0 -7 9 107.2 3.41
 0 -7 -9 90.98 3.32
 0 -7 -9 101.84 3.46
 0 7 -10 584.66 17.75
 0 7 -10 555.03 18.35
 0 7 10 578.98 17.57
 0 7 10 580.95 18.36
 0 -7 10 571.46 18.26
 0 -7 10 564.33 18.35
 0 -7 -10 590.42 18.42
 0 7 -11 257.91 8.24
 0 7 -11 259.77 8.77
 0 7 11 255.4 8.22
 0 7 11 290.07 8.88
 0 -7 11 239.88 8.18
 0 -7 11 252.82 8.56
 0 -7 -11 300.41 8.88
 0 -7 -11 252.7 8.43
 0 7 -12 960.1 29.27
 0 7 -12 917.99 29.48
 0 7 12 976.96 29.06
 0 7 12 975.38 29.51
 0 -7 12 936.98 28.87
 0 -7 12 929.03 30.02
 0 -7 -12 869.71 29.85
 0 -7 -12 1010.41 30.62
 0 7 -13 11.26 0.53
 0 7 -13 10.1 0.83
 0 7 13 8.54 0.46
 0 7 13 11.43 0.47
 0 -7 13 9.95 0.5
 0 -7 13 13.27 0.84
 0 -7 -13 10.06 0.55
 0 -7 -13 10.5 0.56
 0 7 -14 19.74 0.82
 0 7 -14 19.46 0.84
 0 7 14 15.13 0.78
 0 -7 14 17.88 0.77
 0 -7 14 17.27 0.89
 0 -7 -14 16.37 0.81
 0 -7 -14 18.49 1.22
 0 7 -15 7.57 0.53
 0 7 15 7.65 0.62
 0 -7 15 7.19 0.47
 0 -7 -15 9.45 0.63
 0 7 -16 36.57 1.64
 0 7 -16 31.87 1.8
 0 7 16 35.48 1.6
 0 -7 16 34.96 1.3
 0 -7 16 38.19 1.71
 0 -7 -16 36.02 1.61
 0 7 -17 1.28 0.78
 0 7 17 1.04 0.5
 0 -7 17 0.59 0.49
 0 -7 -17 1.38 0.45
 0 7 -18 0.61 0.96
 0 7 18 -0.14 0.37
 0 -7 18 -0.12 0.86
 0 7 -19 32.05 2.62
 0 7 -19 35.41 2.08
 0 -7 19 36.58 1.61
 0 -7 19 33.83 2.13
 0 8 0 245.05 8.73
 0 -8 0 285.76 8.86
 0 -8 0 275.35 9.07
 0 8 -1 190.58 6.33
 0 8 -1 204.83 6.76
 0 8 1 203.13 6.73
 0 8 1 196.41 6.23
 0 -8 1 203.41 6.69
 0 -8 1 197.14 6.31
 0 -8 -1 194.62 6.15
 0 -8 -1 198.75 6.25
 0 8 -2 28.69 1.09
 0 8 -2 31.12 1.13
 0 8 2 31.24 1.14
 0 8 2 30.11 1.07
 0 -8 2 32.89 1.15
 0 -8 2 31.5 1.09
 0 -8 -2 31.1 1.13
 0 -8 -2 31.96 1.09
 0 8 3 40.16 1.49
 0 8 3 43.4 1.58
 0 -8 -3 43.02 1.59
 0 -8 -3 46.72 1.53
 0 8 -4 339.81 11.13
 0 8 -4 348.63 11.42
 0 8 4 355.35 11.35
 0 8 4 376.65 11.57
 0 -8 4 342.8 11.42
 0 -8 4 333.97 11
 0 -8 -4 385.75 11.35
 0 8 -5 1.54 0.25
 0 8 -5 1.52 0.28
 0 8 5 2.65 0.29
 0 -8 5 1.61 0.24
 0 -8 5 1.22 0.25
 0 -8 -5 1.43 0.3
 0 -8 -5 1.55 0.18
 0 8 -6 0.35 0.3
 0 8 -6 0.77 0.27
 0 8 6 -0.05 0.26
 0 8 6 0 0.19
 0 -8 6 0.23 0.27
 0 -8 6 0.14 0.25
 0 -8 -6 0.07 0.12
 0 -8 -6 0.06 0.17
 0 8 -7 0.59 0.28
 0 8 -7 0.63 0.3
 0 8 7 0.9 0.21
 0 8 7 0.96 0.23
 0 -8 7 0.94 0.26
 0 -8 7 1.04 0.16
 0 -8 -7 0.92 0.16
 0 -8 -7 0.97 0.18
 0 8 -8 44.36 1.71
 0 8 -8 47.68 1.8
 0 8 8 47.02 1.61
 0 8 8 45.46 1.68
 0 -8 8 46.59 1.53
 0 -8 8 54.75 2.08
 0 -8 -8 40.22 1.55
 0 -8 -8 48.21 1.54
 0 8 -9 28.19 1.09
 0 8 -9 30.63 1.24
 0 8 9 29.93 1.11
 0 8 9 27.6 1.13
 0 -8 9 29.9 1.1
 0 -8 9 31.23 1.15
 0 -8 -9 27.52 1.07
 0 -8 -9 29.33 1.25
 0 8 -10 83.12 2.86
 0 8 -10 85.96 3.07
 0 8 10 90.22 2.86
 0 8 10 89.32 3.08
 0 -8 10 82.83 2.76
 0 -8 10 88.16 3.16
 0 -8 -10 82.57 2.82
 0 -8 -10 92.51 3.19
 0 8 -11 67.99 2.34
 0 8 -11 65.79 2.54
 0 8 11 71.24 2.34
 0 8 11 66.2 2.3
 0 -8 11 70.57 2.37
 0 -8 11 70.67 2.43
 0 -8 -11 66.73 2.45
 0 -8 -11 71.81 2.64
 0 8 -12 0.38 0.3
 0 8 -12 -0.08 0.37
 0 8 12 0.46 0.19
 0 -8 12 0.81 0.28
 0 -8 12 0.92 0.39
 0 -8 -12 0.47 0.18
 0 -8 -12 0.6 0.29
 0 8 -13 224.88 7.13
 0 8 -13 208.92 7.22
 0 8 13 228.38 7.06
 0 8 13 215.74 7.1
 0 -8 13 211.52 7.07
 0 -8 13 235.2 7.43
 0 -8 -13 210.08 7.19
 0 -8 -13 241.49 7.5
 0 8 -14 12.25 0.77
 0 8 -14 13.33 0.89
 0 8 14 11.56 0.65
 0 8 14 12.62 0.64
 0 -8 14 12.95 0.64
 0 -8 14 11.94 0.81
 0 -8 -14 14.24 0.55
 0 -8 -14 13.26 1.02
 0 8 -15 -0.32 0.68
 0 -8 15 0.97 0.44
 0 8 -16 29.12 1.64
 0 8 -16 21.96 1.17
 0 -8 16 26.44 1.07
 0 8 -17 1.64 0.87
 0 -8 17 1.99 0.74
 0 -8 17 1.67 0.77
 0 -8 -17 0.75 0.28
 0 8 -18 26.54 2.3
 0 8 18 28.22 1.11
 0 -8 18 31.42 1.47
 0 8 -19 6.38 1.1
 0 -8 19 4.61 0.88
 0 -8 -19 3.34 0.58
 0 9 0 0.03 0.39
 0 9 0 -0.59 0.28
 0 -9 0 0.07 0.15
 0 -9 0 0.37 0.22
 0 9 -1 50.79 1.89
 0 9 -1 52.29 1.9
 0 9 1 51.9 1.96
 0 9 1 52.49 1.88
 0 -9 1 52.04 1.95
 0 -9 1 52.32 1.89
 0 -9 -1 50.26 1.78
 0 -9 -1 53.11 1.73
 0 9 -2 3.24 0.74
 0 9 -2 3.46 0.72
 0 9 2 3.85 0.37
 0 9 2 3.34 0.35
 0 -9 2 3.54 0.65
 0 -9 2 3.45 0.63
 0 -9 -2 3.32 0.25
 0 -9 -2 3.42 0.19
 0 9 -3 79.94 3.11
 0 9 -3 95.62 3.57
 0 9 3 87.15 3.04
 0 9 3 82.66 2.94
 0 -9 -3 81.26 2.8
 0 -9 -3 88.48 3.04
 0 9 4 2.59 0.27
 0 9 4 2.07 0.24
 0 -9 4 2.38 0.22
 0 -9 4 2.13 0.24
 0 -9 -4 2.35 0.24
 0 -9 -4 2.26 0.21
 0 9 -5 172.47 5.86
 0 9 -5 167.25 5.65
 0 9 5 180.88 5.79
 0 9 5 174.9 5.77
 0 -9 5 168.04 5.7
 0 -9 5 177.41 5.81
 0 -9 -5 171.39 5.77
 0 -9 -5 169.81 5.49
 0 9 -6 26.42 1.02
 0 9 -6 25.52 1.1
 0 9 6 27.09 1.13
 0 9 6 25.18 1.06
 0 -9 6 26.32 1.01
 0 -9 6 26.25 1.02
 0 -9 -6 24.67 1.02
 0 -9 -6 28.16 1.07
 0 9 -7 16.78 0.81
 0 9 -7 16.88 0.75
 0 9 7 19.51 0.91
 0 9 7 21.95 1.17
 0 -9 7 16.96 0.79
 0 -9 7 18.84 0.73
 0 -9 -7 15.68 0.95
 0 -9 -7 18.64 0.72
 0 9 -8 128.91 4.96
 0 9 8 133.38 4.38
 0 9 8 121.65 4.19
 0 -9 8 152.15 4.92
 0 -9 -8 129.86 4.32
 0 9 -9 147.21 4.96
 0 9 -9 144.45 5.14
 0 9 9 147.17 4.68
 0 9 9 144.94 4.87
 0 -9 9 146.92 4.99
 0 -9 9 151.91 4.99
 0 -9 -9 144.47 4.75
 0 -9 -9 142.14 4.76
 0 9 -10 198.87 6.56
 0 9 -10 187.88 6.26
 0 9 10 192.92 6.11
 0 9 10 190.11 6.07
 0 -9 10 193.69 6.26
 0 -9 10 190.46 6.04
 0 -9 -10 179.51 6.25
 0 -9 -10 196.74 6.49
 0 9 -11 1.7 0.39
 0 9 -11 1.56 0.38
 0 9 11 0.4 0.27
 0 9 11 0.66 0.19
 0 -9 11 0.78 0.32
 0 -9 11 0.99 0.3
 0 -9 -11 0.59 0.19
 0 -9 -11 0.77 0.3
 0 9 -12 5.34 0.46
 0 9 -12 5.49 0.5
 0 9 12 5.68 0.35
 0 9 12 4.87 0.34
 0 -9 12 5.49 0.37
 0 -9 12 5.91 0.6
 0 -9 -12 5 0.3
 0 -9 -12 6.3 0.47
 0 9 -13 6.51 0.47
 0 9 -13 7.3 0.55
 0 9 13 7.68 0.39
 0 9 13 6.51 0.4
 0 -9 13 5.98 0.46
 0 -9 13 6.89 0.49
 0 -9 -13 6.26 0.39
 0 -9 -13 7.69 0.57
 0 9 -14 26.67 1.22
 0 9 14 27.29 1.22
 0 -9 14 27.97 1.1
 0 -9 14 26.49 1.22
 0 -9 -14 31.17 1.25
 0 9 -15 0.12 0.55
 0 9 -15 0.15 0.56
 0 9 15 0.34 0.42
 0 -9 15 0.04 0.36
 0 -9 15 -0.47 0.58
 0 -9 -15 -0.06 0.32
 0 9 -16 4.41 0.62
 0 -9 16 6.26 0.57
 0 -9 -16 6.29 0.49
 0 -9 17 -0.02 0.7
 0 9 -18 0.41 1.17
 0 9 -18 1.38 0.94
 0 -9 18 -0.17 0.72
 0 10 0 119.63 5.11
 0 10 0 97.29 4.93
 0 -10 0 116.47 5.11
 0 -10 0 129.4 5.41
 0 10 -1 207.38 6.94
 0 10 -1 205.81 6.84
 0 10 1 207.4 6.78
 0 -10 1 202 6.87
 0 -10 1 202.34 6.67
 0 10 -2 5.25 0.4
 0 10 -2 5.36 0.4
 0 10 2 5.14 0.44
 0 10 2 5.77 0.37
 0 -10 2 5.52 0.3
 0 -10 2 5.45 0.31
 0 -10 -2 5.41 0.27
 0 -10 -2 5.87 0.31
 0 10 -3 0.42 0.25
 0 10 -3 0.77 0.39
 0 10 3 1.01 0.29
 0 10 3 0.16 0.21
 0 -10 3 0.18 0.19
 0 -10 -3 0.29 0.19
 0 -10 -3 0.59 0.2
 0 10 4 -0.24 0.24
 0 10 4 -0.04 0.2
 0 -10 4 0.77 0.26
 0 -10 4 0.14 0.22
 0 -10 -4 0.03 0.17
 0 -10 -4 0.09 0.17
 0 10 -5 379.54 12.11
 0 10 -5 359.5 12.05
 0 10 5 374.85 12.4
 0 10 5 421.66 12.74
 0 -10 5 368.34 12.1
 0 -10 5 378.68 12.25
 0 -10 -5 431.42 12.8
 0 -10 -5 397.73 12.31
 0 10 -6 2.21 0.37
 0 10 -6 1.99 0.35
 0 -10 6 2.12 0.29
 0 -10 6 2.23 0.3
 0 10 -7 0.58 0.35
 0 10 -7 0.63 0.31
 0 10 7 0.21 0.37
 0 10 7 0.47 0.19
 0 -10 7 0.43 0.27
 0 -10 7 0.41 0.28
 0 -10 -7 0.69 0.2
 0 -10 -7 1.07 0.23
 0 10 -8 93.12 3.11
 0 10 -8 87.62 3.21
 0 10 8 91.81 3.08
 0 10 8 86.1 2.88
 0 -10 8 91.68 3.11
 0 -10 8 95.29 3.24
 0 -10 -8 83.9 3
 0 -10 -8 86.83 2.88
 0 10 -9 83.95 2.88
 0 10 -9 78.85 2.96
 0 10 9 81.52 2.79
 0 10 9 83.96 3
 0 -10 9 80.34 2.85
 0 -10 9 84.8 2.92
 0 -10 -9 75.46 2.76
 0 -10 -9 85.16 2.8
 0 10 10 0.34 0.3
 0 10 10 0.12 0.35
 0 -10 -10 0 0.2
 0 -10 -10 0 0.25
 0 10 -11 55.64 2.07
 0 10 -11 46.5 1.94
 0 10 11 57.23 1.85
 0 10 11 57.88 2.04
 0 -10 11 53.67 1.97
 0 -10 11 47.85 1.85
 0 -10 -11 50.16 1.88
 0 -10 -11 59.21 1.94
 0 10 -12 1.08 0.43
 0 10 -12 1.07 0.36
 0 10 12 0.77 0.26
 0 10 12 1.42 0.35
 0 -10 12 1.65 0.39
 0 -10 12 0.91 0.36
 0 -10 -12 1.59 0.24
 0 -10 -12 1.05 0.34
 0 10 -13 83.43 3.06
 0 10 -13 79.4 3.11
 0 10 13 80.55 2.65
 0 -10 13 70.79 3.01
 0 -10 13 79.17 3.14
 0 -10 -13 78.15 2.81
 0 10 -14 1.38 0.51
 0 10 -14 1.04 0.28
 0 10 14 0.75 0.24
 0 -10 14 0.7 0.35
 0 -10 14 0.58 0.39
 0 -10 -14 0.77 0.29
 0 -10 -14 1.09 0.43
 0 10 -15 0.49 0.59
 0 -10 15 0.62 0.43
 0 -10 15 0.9 0.72
 0 10 -16 0.36 0.63
 0 -10 16 1.6 0.6
 0 10 -17 26.75 2.07
 0 -10 17 34.24 1.31
 0 10 -18 49.31 2.31
 0 10 18 46.5 2.13
 0 -10 18 50.41 1.97
 0 -10 18 52.29 2.32
 0 -10 -18 43.52 1.8
 0 11 0 -0.09 0.35
 0 11 0 0.18 0.2
 0 -11 0 -0.5 0.24
 0 -11 0 0.1 0.14
 0 11 1 17.7 0.81
 0 11 1 17.17 0.79
 0 -11 -1 16.39 0.77
 0 -11 -1 17.94 0.78
 0 11 2 61.77 2.39
 0 11 2 63.83 2.5
 0 -11 2 66.41 2.25
 0 -11 -2 62 2.22
 0 -11 -2 66.09 2.23
 0 11 -3 89.46 3.06
 0 11 -3 95.27 3.7
 0 11 3 94.63 3.13
 0 11 3 93.19 3.08
 0 -11 3 97.01 3.45
 0 -11 3 94.25 3.05
 0 -11 -3 90.67 3
 0 -11 -3 100.19 3.19
 0 11 -4 109.24 3.42
 0 11 -4 105.08 3.7
 0 11 4 105.46 3.65
 0 11 4 98.95 3.48
 0 -11 -4 102.28 3.37
 0 -11 -4 110 3.64
 0 11 -5 52.41 1.85
 0 11 -5 55.6 1.98
 0 11 5 52.06 1.78
 0 11 5 50.05 1.95
 0 -11 5 50.35 1.77
 0 -11 5 51.92 1.99
 0 -11 -5 50.3 1.79
 0 -11 -5 55.32 1.8
 0 11 -6 318.69 9.97
 0 11 -6 303.58 9.86
 0 11 6 326 10.35
 0 11 6 304.93 9.64
 0 -11 6 313.33 9.88
 0 -11 6 323.42 10.17
 0 -11 -6 305.61 9.97
 0 -11 -6 311.28 10.24
 0 11 -7 670.47 20.38
 0 11 -7 621.4 20.26
 0 11 7 675.4 20.93
 0 11 7 691.22 20.9
 0 -11 7 634.84 20.05
 0 -11 7 641.7 20.2
 0 -11 -7 645.65 20.55
 0 -11 -7 694.54 20.82
 0 11 -8 49.15 1.73
 0 11 -8 47.67 1.67
 0 11 8 48.06 1.77
 0 11 8 46.3 1.86
 0 -11 8 47.73 1.61
 0 -11 8 48.06 1.67
 0 -11 -8 48.68 1.77
 0 -11 -8 50.41 1.61
 0 11 -9 2.9 0.44
 0 11 -9 2.57 0.36
 0 -11 9 3.29 0.36
 0 -11 9 3.39 0.3
 0 11 -10 0.22 0.38
 0 11 -10 0.09 0.39
 0 11 10 0.17 0.29
 0 11 10 -0.01 0.22
 0 -11 10 -0.02 0.32
 0 -11 10 0.4 0.26
 0 -11 -10 -0.21 0.22
 0 -11 -10 0.4 0.26
 0 11 -11 9.73 0.6
 0 11 -11 6.64 0.52
 0 11 11 7.74 0.43
 0 11 11 6.67 0.44
 0 -11 11 9.01 0.52
 0 -11 11 7.33 0.41
 0 -11 -11 6.1 0.5
 0 -11 -11 8.24 0.48
 0 11 -12 13.43 0.75
 0 11 -12 12.88 0.74
 0 11 12 14.79 0.72
 0 11 12 10.28 0.63
 0 -11 12 12 0.72
 0 -11 12 11.46 0.69
 0 -11 -12 14.73 0.71
 0 11 -13 0.6 0.48
 0 11 -13 -0.04 0.46
 0 11 13 0.4 0.28
 0 -11 13 0.62 0.42
 0 -11 13 1.17 0.52
 0 -11 -13 -0.08 0.23
 0 11 -14 8.53 0.73
 0 11 -14 6.52 0.68
 0 -11 14 7.11 0.77
 0 -11 14 7.75 0.56
 0 11 -15 7.43 0.95
 0 11 -15 11.05 0.99
 0 11 15 8.1 0.65
 0 -11 15 10.69 0.8
 0 -11 15 11.32 0.97
 0 -11 -15 10.64 0.93
 0 11 -16 106.52 3.97
 0 11 -16 110.18 3.7
 0 11 16 105.9 3.69
 0 -11 16 111.47 3.65
 0 -11 16 107.55 3.84
 0 11 -17 -0.26 1.08
 0 11 17 0.19 0.66
 0 -11 17 1.6 1.03
 0 -11 -17 -0.46 0.61
 0 12 0 1673.33 51.23
 0 12 0 1717.09 51.54
 0 -12 0 1545.39 51.19
 0 12 -1 13.75 0.89
 0 12 -1 12.16 0.63
 0 12 1 13.38 0.67
 0 12 1 12.98 0.68
 0 -12 1 11.25 0.63
 0 -12 1 14.37 0.78
 0 -12 -1 12.27 0.58
 0 -12 -1 13.57 0.7
 0 12 -2 45.99 1.83
 0 12 -2 51.7 2.01
 0 -12 2 47.41 1.83
 0 -12 2 46.51 1.75
 0 -12 -2 58.01 2.24
 0 12 -3 17.51 0.8
 0 12 -3 20.44 1.1
 0 12 3 18.91 0.88
 0 12 3 18.14 0.93
 0 -12 3 19.48 1
 0 -12 3 18.63 0.78
 0 -12 -3 17.92 0.73
 0 -12 -3 18.29 0.7
 0 12 -4 1.79 0.32
 0 12 -4 1.54 0.35
 0 12 4 1.55 0.35
 0 12 4 1.62 0.31
 0 -12 -4 1.72 0.23
 0 -12 -4 1.71 0.25
 0 12 5 267.48 8.74
 0 12 5 258.96 8.36
 0 -12 5 264.82 8.68
 0 -12 5 267.63 8.44
 0 -12 -5 254.42 8.58
 0 -12 -5 277.52 8.5
 0 12 -6 30.08 1.12
 0 12 -6 27.33 1.13
 0 12 6 30.97 1.23
 0 12 6 27.26 1.07
 0 -12 6 29.01 1.09
 0 -12 6 30.43 1.26
 0 -12 -6 28.2 1.11
 0 -12 -6 32.64 1.21
 0 12 -7 17.66 0.78
 0 12 -7 17.58 0.67
 0 -12 7 18.71 0.77
 0 -12 7 16.91 0.65
 0 12 -8 -0.17 0.37
 0 12 -8 0.06 0.39
 0 12 8 0.07 0.44
 0 12 8 0.21 0.26
 0 -12 8 -0.43 0.31
 0 -12 8 0.13 0.17
 0 -12 -8 0.3 0.28
 0 -12 -8 0.63 0.26
 0 12 -9 76.89 2.73
 0 12 -9 74.44 2.92
 0 12 9 81.45 2.67
 0 12 9 73.88 2.58
 0 -12 9 76.82 2.65
 0 -12 9 77.93 3
 0 -12 -9 76.51 2.82
 0 -12 -9 87.93 2.86
 0 12 -10 6.89 0.51
 0 12 -10 7.29 0.72
 0 12 10 7.4 0.44
 0 12 10 7.34 0.44
 0 -12 10 6.54 0.48
 0 -12 10 7.08 0.61
 0 -12 -10 6.68 0.42
 0 -12 -10 7.09 0.4
 0 12 -11 18.99 0.94
 0 12 -11 17.78 1.01
 0 12 11 19.31 1.02
 0 12 11 22.12 0.79
 0 -12 11 18.25 0.92
 0 -12 11 19.17 0.96
 0 -12 -11 20.2 0.87
 0 -12 -11 22.01 0.85
 0 12 -12 7 0.52
 0 12 -12 7.23 0.5
 0 12 12 9.36 0.56
 0 12 12 6.86 0.46
 0 -12 12 5.99 0.52
 0 -12 12 7.02 0.55
 0 -12 -12 5.79 0.45
 0 -12 -12 8.48 0.53
 0 12 -13 0.49 0.57
 0 12 -13 0.88 0.52
 0 12 13 1.37 0.44
 0 -12 13 0.81 0.5
 0 -12 13 1.06 0.52
 0 -12 -13 0.17 0.48
 0 12 -14 13.65 1.36
 0 12 -14 12.21 1.45
 0 12 14 13.18 0.78
 0 12 14 15.25 0.8
 0 -12 14 13.77 1.44
 0 -12 14 14.92 1.2
 0 -12 -14 10.79 1.07
 0 12 -15 9.25 1.01
 0 12 -15 10.93 1.1
 0 12 15 11.35 0.84
 0 -12 15 12.35 0.88
 0 -12 15 11.48 0.94
 0 -12 -15 8.22 0.81
 0 12 -16 3.99 0.95
 0 12 -16 3.83 0.88
 0 12 16 4.4 1.01
 0 -12 16 3.61 0.82
 0 -12 16 4.8 0.82
 0 -12 -16 2.48 0.68
 0 12 -17 2.21 1.28
 0 -12 17 1.22 0.87
 0 13 0 5.58 1.07
 0 13 0 3.38 0.85
 0 -13 0 1.82 0.8
 0 13 -1 537.5 17.3
 0 13 -1 530.1 16.33
 0 13 1 521.47 16.29
 0 13 1 526.9 16.37
 0 -13 1 528.82 16.34
 0 -13 1 513.03 16.64
 0 -13 -1 524.53 16.59
 0 -13 -1 519.4 16.43
 0 13 -2 138.2 5.11
 0 13 -2 140.41 5.01
 0 13 2 149.28 5.16
 0 13 2 137.36 4.79
 0 -13 2 135.3 4.74
 0 -13 2 141.88 5.12
 0 -13 -2 136.51 4.76
 0 -13 -2 147.4 4.85
 0 13 -3 98.94 3.54
 0 13 -3 98.75 3.57
 0 13 3 102.9 3.28
 0 13 3 105.81 3.78
 0 -13 3 89.65 3.16
 0 -13 3 95.77 3.44
 0 -13 -3 101.2 3.44
 0 -13 -3 96.66 3.19
 0 13 -4 8.62 0.52
 0 13 -4 9.51 0.56
 0 13 4 10.64 0.64
 0 13 4 9.24 0.48
 0 -13 4 10.1 0.48
 0 -13 4 12.1 0.61
 0 -13 -4 8.75 0.56
 0 -13 -4 9.73 0.57
 0 13 5 38.16 1.46
 0 13 5 33.93 1.33
 0 -13 5 31 1.35
 0 -13 5 30.56 1.42
 0 -13 -5 36.59 1.36
 0 -13 -5 38.45 1.33
 0 13 -6 245.8 7.97
 0 13 -6 251.75 8.26
 0 13 6 264.9 8.44
 0 13 6 266.14 8.34
 0 -13 6 251.28 8.32
 0 -13 6 256.13 8.26
 0 -13 -6 243.43 7.91
 0 -13 -6 273.32 8.66
 0 13 -7 122.26 3.83
 0 13 -7 116.87 3.91
 0 13 7 127.41 4.2
 0 13 7 121.12 4.35
 0 -13 7 119.32 3.89
 0 -13 7 114.77 3.88
 0 -13 -7 121.13 3.86
 0 -13 -7 124.9 3.98
 0 13 -8 146.66 5.28
 0 13 -8 141.62 4.89
 0 13 8 156.8 5.04
 0 13 8 145.51 4.73
 0 -13 8 143.06 5.21
 0 -13 8 141.94 4.75
 0 -13 -8 138.04 4.72
 0 -13 -8 147.84 4.58
 0 13 -9 0.59 0.42
 0 13 -9 0.79 0.37
 0 13 9 0.67 0.34
 0 13 9 0.26 0.3
 0 -13 9 0.59 0.24
 0 -13 9 0.82 0.4
 0 -13 -9 0.27 0.24
 0 -13 -9 0.56 0.25
 0 13 -10 -0.65 0.45
 0 13 -10 -0.14 0.32
 0 13 10 0.13 0.28
 0 13 10 -0.22 0.41
 0 -13 10 -0.67 0.4
 0 -13 10 0.21 0.39
 0 -13 -10 -0.06 0.26
 0 -13 -10 0.06 0.23
 0 13 -11 0.91 0.49
 0 13 -11 0.09 0.36
 0 13 11 0.35 0.47
 0 13 11 0.56 0.38
 0 -13 11 0.72 0.42
 0 -13 11 1.16 0.32
 0 -13 -11 0.36 0.24
 0 -13 -11 1.28 0.36
 0 13 -12 38.84 1.76
 0 13 12 42.13 1.55
 0 13 12 37.96 1.64
 0 -13 12 35.1 1.82
 0 -13 12 40.82 1.56
 0 13 -13 66.48 3.19
 0 13 -13 63.45 2.34
 0 13 13 64.83 2.83
 0 -13 13 69.36 2.5
 0 -13 13 58.79 2.78
 0 -13 -13 66.65 2.41
 0 13 -14 1.14 0.83
 0 13 14 1.56 0.77
 0 -13 14 0.3 0.7
 0 -13 14 0.2 0.63
 0 -13 -14 0.2 0.28
 0 13 -15 141.58 6.07
 0 13 -15 154.96 4.93
 0 13 15 160.2 5.57
 0 -13 15 149.56 5.39
 0 -13 15 145.07 5.05
 0 -13 -15 151 5.23
 0 13 -16 53.67 2.26
 0 -13 16 55.12 2.24
 0 14 0 489.7 16.01
 0 14 0 503.23 15.93
 0 -14 0 465.29 15.13
 0 -14 0 493.4 15.99
 0 14 -1 7 0.58
 0 14 -1 8.47 0.65
 0 14 1 8.19 0.59
 0 14 1 7.19 0.49
 0 -14 1 6.99 0.43
 0 -14 1 6.8 0.43
 0 -14 -1 6.75 0.49
 0 -14 -1 7.02 0.42
 0 14 2 129.4 4.6
 0 14 2 121.84 4.19
 0 -14 -2 118.33 4.2
 0 -14 -2 127.73 4.44
 0 14 -3 91.11 3.66
 0 14 -3 91.12 3.27
 0 14 3 92.99 3.25
 0 14 3 98.62 3.53
 0 -14 3 84.52 2.92
 0 -14 3 97.99 3.62
 0 -14 -3 95.74 3.27
 0 -14 -3 91.14 3
 0 14 -4 14.17 0.71
 0 14 -4 14.24 0.78
 0 14 4 10.82 0.86
 0 14 4 15.6 0.66
 0 -14 4 14.94 0.68
 0 -14 4 14.24 0.79
 0 -14 -4 14.63 0.63
 0 -14 -4 14.25 0.83
 0 14 -5 27.19 1.5
 0 14 -5 28.77 1.21
 0 14 5 28.44 1.22
 0 14 5 31.36 1.13
 0 -14 -5 28.87 1.26
 0 -14 -5 30.96 1.25
 0 14 -6 22.09 0.93
 0 14 6 24.52 0.97
 0 14 6 19.3 1.1
 0 -14 6 19.66 0.93
 0 -14 6 23.26 0.9
 0 -14 -6 18.8 0.92
 0 14 -7 5.72 0.48
 0 14 -7 5.9 0.51
 0 14 7 6.55 0.59
 0 14 7 5.46 0.48
 0 -14 7 5.21 0.45
 0 -14 7 5.48 0.42
 0 -14 -7 4.78 0.42
 0 -14 -7 6.91 0.43
 0 14 -8 0.49 0.42
 0 14 -8 0.4 0.25
 0 -14 8 -0.06 0.27
 0 -14 8 0.57 0.23
 0 14 -9 13.17 0.71
 0 14 -9 12.6 0.78
 0 14 9 12.76 0.68
 0 14 9 9.48 0.68
 0 -14 9 11.86 0.64
 0 -14 9 8.98 0.62
 0 -14 -9 8.62 0.67
 0 -14 -9 10.45 0.58
 0 14 -10 7.99 0.7
 0 -14 10 7.69 0.59
 0 -14 -10 7.75 0.49
 0 14 -11 3.98 0.62
 0 14 11 4.53 0.65
 0 -14 -11 2.89 0.38
 0 -14 -11 5.77 0.6
 0 14 -12 11.3 1.07
 0 14 12 13.51 1.2
 0 -14 12 10.41 0.84
 0 -14 -12 12.62 0.77
 0 14 -13 8.16 1.17
 0 14 -13 14.81 1.17
 0 14 13 12.35 0.94
 0 14 13 15.46 1.11
 0 -14 13 17.55 1.37
 0 -14 -13 11.67 0.94
 0 14 -14 5.48 0.93
 0 14 14 9.92 0.85
 0 -14 14 5.47 0.79
 0 14 -15 10.57 0.97
 0 14 15 9.92 0.95
 0 -14 15 8.45 0.93
 0 15 0 -0.09 0.43
 0 15 0 -0.07 0.43
 0 -15 0 -0.21 0.31
 0 -15 0 0 0.24
 0 15 -1 28.64 1.45
 0 15 1 35.66 1.46
 0 15 1 35.27 1.5
 0 -15 -1 32.17 1.51
 0 -15 -1 34.44 1.65
 0 15 -2 45.38 2.04
 0 15 -2 43.56 1.86
 0 15 2 43.23 1.67
 0 15 2 45.87 1.7
 0 -15 2 41.04 1.53
 0 -15 2 47.31 1.87
 0 -15 -2 39.64 1.89
 0 -15 -2 47.89 1.86
 0 15 -3 118.22 4.52
 0 15 -3 123.7 4.22
 0 15 3 119.85 3.89
 0 15 3 116.32 4.34
 0 -15 3 125.1 4.42
 0 -15 -3 119.54 4.02
 0 -15 -3 110.09 3.97
 0 15 -4 0.66 0.34
 0 15 -4 0.92 0.46
 0 15 4 0.52 0.38
 0 -15 4 0.51 0.23
 0 -15 4 0.36 0.29
 0 -15 -4 0.62 0.28
 0 15 -5 20.22 1.07
 0 15 -5 20.36 1.04
 0 15 5 23.19 1.07
 0 15 5 21.81 0.88
 0 -15 5 19.72 1.09
 0 -15 -5 20 0.88
 0 -15 -5 22.06 0.88
 0 15 6 40.54 1.52
 0 15 6 34.81 1.42
 0 -15 6 35.17 1.42
 0 -15 6 35.74 1.53
 0 -15 -6 39.86 1.38
 0 -15 -6 41.03 1.53
 0 15 -7 0.9 0.48
 0 15 -7 0.84 0.27
 0 15 7 0.53 0.57
 0 15 7 0.99 0.32
 0 -15 7 0.82 0.36
 0 -15 7 0.75 0.2
 0 -15 -7 1.18 0.35
 0 -15 -7 0.81 0.28
 0 15 -8 0.49 0.55
 0 15 -8 0.13 0.38
 0 15 8 0.73 0.39
 0 -15 8 0.36 0.4
 0 -15 8 0.45 0.35
 0 -15 -8 0.66 0.36
 0 15 -9 0.05 0.3
 0 15 -9 0.24 0.55
 0 15 9 0.04 0.63
 0 15 9 0.13 0.43
 0 -15 9 0.06 0.22
 0 -15 9 -0.17 0.44
 0 -15 -9 0.44 0.38
 0 -15 -9 0.29 0.35
 0 15 -10 14.72 1.18
 0 -15 -10 16.62 0.83
 0 15 -11 36.3 1.91
 0 15 11 44.55 1.86
 0 15 11 42.65 1.65
 0 -15 -11 44.04 1.73
 0 15 -12 12.66 0.95
 0 15 -12 17.82 1.16
 0 15 12 12.2 0.85
 0 -15 12 15.98 1.2
 0 -15 -12 15.17 0.89
 0 15 -13 3.05 0.68
 0 15 -13 5.09 0.93
 0 15 13 4.05 0.94
 0 15 13 3.61 0.81
 0 -15 13 4.99 1.01
 0 15 14 5.46 0.87
 0 -15 14 2.95 0.66
 0 16 0 201.32 6.88
 0 16 0 195.14 7.16
 0 -16 0 191.2 6.77
 0 -16 0 201.53 6.82
 0 16 -1 4.98 0.57
 0 16 -1 4.92 0.43
 0 16 1 4.82 0.59
 0 16 1 5.12 0.56
 0 -16 1 4.62 0.44
 0 -16 1 5.4 0.43
 0 -16 -1 4.97 0.48
 0 -16 -1 4.34 0.45
 0 16 -2 2.62 0.48
 0 16 -2 1.65 0.42
 0 16 2 1.56 0.52
 0 16 2 2.08 0.42
 0 -16 2 1.53 0.32
 0 -16 2 1.99 0.31
 0 -16 -2 1.89 0.32
 0 -16 -2 1.93 0.28
 0 16 -3 40.55 1.98
 0 16 3 41.16 1.46
 0 16 3 41.27 1.71
 0 -16 3 40.25 1.71
 0 -16 3 38.64 1.8
 0 -16 -3 42.66 1.5
 0 -16 -3 35.31 1.38
 0 16 -4 0.34 0.51
 0 16 -4 -0.15 0.37
 0 16 4 0.05 0.41
 0 -16 4 -0.16 0.36
 0 -16 4 0.44 0.31
 0 -16 -4 0.14 0.32
 0 16 -5 38.01 1.74
 0 16 -5 33.12 1.66
 0 16 5 36.16 1.45
 0 16 5 39.17 1.66
 0 -16 5 36.5 1.66
 0 -16 5 33.29 1.4
 0 -16 -5 38.17 1.34
 0 -16 -5 35.07 1.55
 0 16 6 0.82 0.5
 0 16 6 1.03 0.48
 0 -16 6 1.27 0.51
 0 -16 -6 1.1 0.39
 0 -16 -6 1.14 0.37
 0 16 -7 29.48 1.53
 0 16 -7 22.86 1.29
 0 16 7 26.38 1.34
 0 16 7 29.14 1.15
 0 -16 7 27.11 1.28
 0 -16 7 25.28 1.21
 0 -16 -7 25.58 1.44
 0 -16 -7 28.37 1.27
 0 16 -8 29.31 1.45
 0 16 -8 23.83 1.2
 0 16 8 29.95 1.24
 0 -16 8 27.91 1.3
 0 -16 8 26.42 1.16
 0 -16 -8 30.34 1.15
 0 16 -9 33.11 1.44
 0 16 -9 32.71 1.29
 0 -16 9 31.97 1.33
 0 -16 9 34.1 1.5
 0 16 -10 7.89 1
 0 16 10 6.16 0.61
 0 -16 10 8.05 0.85
 0 -16 -10 7.16 0.77
 0 16 -11 1.6 1.03
 0 16 11 1.93 0.96
 0 16 11 1.15 0.77
 0 -16 11 1.58 0.8
 0 -16 -11 0.82 0.67
 0 -16 -11 1.65 0.91
 0 16 -12 8.49 1.14
 0 16 -12 7.31 1.07
 0 16 12 7.45 1.02
 0 -16 12 5.59 0.92
 0 -16 12 7.29 1.05
 0 -16 -12 6.38 0.93
 0 -16 -12 6.91 0.95
 0 16 -13 95.15 4.42
 0 16 -13 99.66 4.15
 0 16 13 101.87 3.42
 0 16 13 95.62 3.42
 0 -16 13 88.38 3.84
 0 -16 13 98.53 4.25
 0 -16 -13 98.42 4.35
 0 -16 -13 84.67 3.81
 0 17 0 0.6 0.55
 0 17 0 0.21 0.29
 0 -17 0 -0.27 0.4
 0 -17 0 -0.08 0.35
 0 17 -1 -0.01 0.55
 0 17 -1 0.2 0.43
 0 17 1 -0.07 0.5
 0 17 1 0.28 0.63
 0 -17 1 0.07 0.3
 0 -17 1 -0.15 0.31
 0 -17 -1 0.25 0.48
 0 -17 -1 0.12 0.3
 0 17 -2 2.2 0.56
 0 17 2 3.6 0.52
 0 17 2 5.01 0.61
 0 -17 2 2.56 0.39
 0 -17 -2 4.87 0.4
 0 -17 -2 3.57 0.41
 0 17 -3 0.67 0.36
 0 17 3 1.27 0.5
 0 -17 3 2.1 0.57
 0 -17 -3 1.78 0.32
 0 -17 -3 1.09 0.3
 0 17 -4 11.83 1.05
 0 17 -4 13.03 1.03
 0 17 4 14.36 0.73
 0 -17 4 11.72 0.85
 0 -17 4 12.49 0.74
 0 -17 -4 13.89 0.74
 0 17 -5 1.15 0.5
 0 17 -5 1.94 0.67
 0 17 5 1.85 0.51
 0 -17 5 1.64 0.41
 0 -17 5 1.57 0.46
 0 -17 -5 2.15 0.37
 0 -17 -5 2.11 0.47
 0 17 -6 57.47 1.93
 0 17 -6 56.66 2.55
 0 17 6 59.05 2.67
 0 17 6 58.38 2.23
 0 -17 -6 52.97 2.14
 0 -17 -6 59.78 2.35
 0 17 -7 78.44 2.69
 0 17 7 87.86 3.3
 0 17 7 79.7 3.17
 0 -17 7 78.17 2.81
 0 -17 7 76.03 2.94
 0 -17 -7 81.53 2.86
 0 -17 -7 87.59 2.87
 0 17 -8 -0.26 1.22
 0 17 -8 -0.91 1.3
 0 17 8 1.13 0.52
 0 -17 8 0.51 0.92
 0 -17 8 0.31 1.07
 0 -17 -8 0.66 0.47
 0 17 -9 1.21 0.63
 0 17 -9 0.77 0.72
 0 17 9 2.09 0.93
 0 17 9 1.04 0.67
 0 -17 9 1.75 0.62
 0 -17 9 1.9 0.69
 0 -17 -9 0.69 0.48
 0 -17 -9 1.13 0.83
 0 17 -10 21.75 1.54
 0 17 -10 24.01 1.6
 0 17 10 23.4 1.43
 0 -17 10 22.34 1.58
 0 -17 10 25.44 1.54
 0 -17 -10 23.87 1.69
 0 17 -11 3.76 1.13
 0 17 -11 5.11 0.86
 0 17 11 4.56 1
 0 17 11 3.91 1
 0 -17 11 5.11 0.94
 0 -17 11 5.09 0.92
 0 -17 -11 5.02 1.06
 0 -17 -11 5.28 1
 0 17 -12 183.98 6.52
 0 17 -12 179.01 6.88
 0 17 12 178.85 7.35
 0 -17 12 189.52 6.68
 0 -17 12 199.11 7.07
 0 -17 -12 195.33 7.06
 0 -17 -12 187.66 6.5
 0 18 0 69.31 2.74
 0 18 0 67.01 2.79
 0 -18 0 67.33 2.41
 0 -18 0 73.14 3.1
 0 18 -1 9.56 0.9
 0 18 -1 5.68 0.78
 0 18 1 8.07 0.91
 0 18 1 6.22 0.71
 0 -18 1 7.57 0.79
 0 -18 -1 8.34 0.52
 0 -18 -1 7.25 0.74
 0 18 -2 1.37 0.69
 0 18 -2 0.29 0.34
 0 18 2 1.06 0.69
 0 18 2 1.11 0.62
 0 -18 2 1.17 0.44
 0 -18 -2 0.84 0.43
 0 -18 -2 1.06 0.41
 0 18 -3 14.75 1.17
 0 18 -3 14.24 0.88
 0 18 3 13.98 1.14
 0 18 3 12.95 0.84
 0 -18 3 14.79 0.94
 0 -18 -3 13.62 0.83
 0 -18 -3 16.02 1.06
 0 18 -4 55.87 3.04
 0 18 -4 54.04 2.65
 0 18 4 60.5 2.75
 0 18 4 54.61 2.17
 0 -18 4 56.41 2.74
 0 -18 4 53.87 2.77
 0 -18 -4 58.96 2.34
 0 -18 -4 59.11 2.21
 0 18 -5 8.9 1.06
 0 18 5 13.96 1.22
 0 18 5 15.67 1.11
 0 -18 5 7.71 0.77
 0 -18 5 9.5 0.85
 0 -18 -5 13.4 0.91
 0 18 -6 12 1.06
 0 18 6 10.25 0.99
 0 18 6 10.8 0.78
 0 -18 6 12.92 0.89
 0 -18 -6 10.3 0.92
 0 -18 -6 13.09 1.12
 0 18 7 0.25 0.58
 0 -18 7 -0.28 0.71
 0 -18 7 0.65 0.47
 0 -18 -7 0 0.43
 0 -18 -7 0.16 0.5
 0 18 -8 67.43 2.9
 0 18 -8 64.66 2.3
 0 18 8 72.21 2.63
 0 18 8 57.58 2.8
 0 -18 8 68.74 3.14
 0 -18 8 66.91 2.43
 0 -18 -8 72.46 2.47
 0 18 -9 26.08 1.22
 0 18 -9 24.12 1.36
 0 18 9 22.47 1.8
 0 18 9 25.63 1.91
 0 -18 9 25.36 1.51
 0 -18 9 25.47 1.33
 0 -18 -9 30.37 1.81
 0 -18 -9 24.86 1.61
 0 18 -10 -1.91 1.13
 0 18 -10 0.32 1.09
 0 18 10 2.98 1.07
 0 -18 10 -1.44 0.99
 0 -18 10 -0.36 0.97
 0 -18 -10 6.26 1.26
 0 18 -11 257.62 8.51
 0 18 -11 268.76 9.88
 0 18 11 244.92 9.25
 0 -18 11 266.04 10.13
 0 -18 11 269.22 10.1
 0 -18 -11 302.46 10.5
 0 -18 -11 276.48 9.01
 0 19 0 -0.01 0.88
 0 19 0 -0.16 0.87
 0 -19 0 0.36 0.72
 0 -19 0 0.17 0.52
 0 19 -1 0.89 0.86
 0 19 -1 0.63 0.85
 0 19 1 -0.57 1.04
 0 19 1 0.1 0.79
 0 -19 1 0.02 0.52
 0 -19 1 -0.37 0.72
 0 -19 -1 0.59 0.68
 0 -19 -1 -0.29 0.68
 0 19 -2 3.55 1.06
 0 19 -2 2.35 0.82
 0 19 2 2.2 1.07
 0 19 2 2.6 0.8
 0 -19 2 2.65 0.79
 0 -19 2 1.71 0.7
 0 -19 -2 1.96 0.71
 0 -19 -2 2.22 0.72
 0 19 -3 3.23 1.28
 0 19 -3 2.03 0.79
 0 19 3 3.82 0.85
 0 19 3 5.06 0.7
 0 -19 3 2.68 0.82
 0 -19 3 2.57 0.47
 0 -19 -3 3.97 0.8
 0 -19 -3 6.5 0.85
 0 19 -4 35.19 2.36
 0 19 -4 38.81 1.81
 0 19 4 35.67 2.19
 0 19 4 38.42 1.5
 0 -19 4 38.75 1.58
 0 -19 4 37.43 1.61
 0 -19 -4 38.01 1.67
 0 -19 -4 35.87 1.68
 0 19 -5 22.68 1.38
 0 19 -5 19.39 1.66
 0 19 5 18.73 1.26
 0 19 5 18.27 1.37
 0 -19 5 23.06 1.08
 0 -19 5 21.16 1.29
 0 -19 -5 23.25 1.2
 0 19 -6 79.45 2.75
 0 19 -6 79.7 2.68
 0 19 6 80.8 3.06
 0 19 6 78.12 2.76
 0 -19 6 78.49 2.83
 0 -19 6 77.59 2.82
 0 -19 -6 80.85 3.61
 0 -19 -6 87.35 3.92
 0 19 -7 18.35 1.77
 0 19 -7 22.66 1.51
 0 19 7 23.57 1.13
 0 -19 -7 21.27 1.36
 0 19 -8 20.78 1.69
 0 19 -8 24 1.17
 0 19 8 24.52 1.76
 0 19 8 27.68 1.31
 0 -19 8 18.71 1.71
 0 -19 8 24.14 1.12
 0 -19 -8 30.17 1.65
 0 19 -9 36.17 1.91
 0 19 -9 43.78 2.05
 0 19 9 42.56 2.27
 0 19 9 41.04 1.73
 0 -19 9 39.07 1.92
 0 -19 9 44.7 1.96
 0 -19 -9 44.05 2.19
 0 -19 -9 48.63 2.21
 0 20 0 2.64 0.92
 0 20 0 4.29 0.92
 0 -20 0 3.32 0.79
 0 -20 0 2.8 0.89
 0 20 -1 53.42 2.21
 0 20 -1 50.77 2.21
 0 -20 1 51.86 2.36
 0 -20 1 48.74 2.43
 0 20 -2 69.74 2.99
 0 20 -2 71.96 2.64
 0 20 2 64.97 3.1
 0 20 2 71.02 2.83
 0 -20 2 74.53 2.95
 0 -20 2 74.03 2.52
 0 -20 -2 73.27 2.94
 0 20 -3 129.64 4.95
 0 20 -3 118.26 5.04
 0 20 3 120.42 4.55
 0 20 3 124.94 4.29
 0 -20 3 134.87 4.86
 0 -20 3 110.16 4.59
 0 -20 -3 120.82 5.56
 0 -20 -3 132.96 4.75
 0 20 -4 78.49 3.73
 0 20 -4 77.4 3.01
 0 20 4 76.9 3.24
 0 20 4 85.58 2.92
 0 -20 4 79.96 3.25
 0 -20 4 79.5 2.67
 0 -20 -4 87.51 3.49
 0 20 -5 -0.04 0.84
 0 20 -5 0.86 0.88
 0 20 5 0.63 0.88
 0 20 5 1.28 0.89
 0 -20 5 0.46 0.75
 0 -20 5 0.71 0.69
 0 -20 -5 1.47 0.97
 0 20 -6 33.65 1.46
 0 20 -6 35.66 1.52
 0 -20 6 34.4 1.48
 0 -20 6 33.42 1.4
 0 20 -7 2.25 0.92
 0 20 7 3.17 1.33
 0 -20 7 4.69 0.72
 0 -20 -7 1.89 1.15
 0 21 0 0.27 1.17
 0 21 0 0.27 0.77
 0 -21 0 0.41 0.8
 0 -21 0 -0.28 0.44
 0 21 -1 43.15 2.07
 0 21 1 34.49 2.78
 0 21 1 46.07 2.25
 0 -21 1 43.77 2.27
 0 -21 1 46.52 1.82
 0 -21 -1 47.3 1.96
 0 -21 -1 51.35 1.98
 0 21 -2 25.58 1.57
 0 21 -2 27.48 1.61
 0 21 2 18.72 1.71
 0 21 2 24.31 1.9
 0 -21 2 23.73 1.55
 0 -21 2 23.29 1.5
 0 -21 -2 23.63 1.72
 0 21 -3 26.88 1.8
 0 21 -3 29.43 1.64
 0 21 3 29.43 1.79
 0 21 3 28.95 1.73
 0 -21 3 31.04 1.61
 0 -21 3 31.44 1.38
 0 -21 -3 28.04 1.54
 0 -21 -3 33.36 1.66
 -1 0 20 37.08 1.56
 -1 0 18 7.55 0.61
 -1 0 18 7.16 0.66
 -1 0 17 13.65 0.77
 -1 0 17 15.71 0.8
 1 0 -17 13.33 0.93
 1 0 -17 12.17 0.83
 -1 0 16 59.19 2.32
 -1 0 16 66.86 2.39
 1 0 -16 74.63 2.62
 1 0 -16 59.49 2.41
 -1 0 15 309.75 10.8
 -1 0 15 322.31 10.85
 1 0 -15 321.76 10.6
 1 0 -15 307.44 10.18
 -1 0 14 90.88 3.24
 -1 0 14 78.72 3
 1 0 -14 86.87 3.06
 1 0 -14 87 2.99
 -1 0 13 23.44 1.07
 -1 0 13 20.89 0.9
 1 0 -13 20.03 0.89
 1 0 -13 22.04 1.03
 -1 0 12 29.91 1.17
 -1 0 12 29.13 1.11
 1 0 -12 27.7 1.17
 1 0 -12 28.38 1.22
 -1 0 11 37.92 1.57
 -1 0 11 39.31 1.83
 1 0 -11 38.42 1.58
 1 0 -11 36.91 1.53
 -1 0 10 75.99 3.2
 -1 0 10 71.56 3.41
 1 0 -10 68.75 3.35
 1 0 -10 71.09 3.12
 -1 0 9 97.08 3.49
 -1 0 9 107.84 3.41
 1 0 -9 100.62 3.35
 1 0 -9 101.44 3.78
 -1 0 8 30.03 1.06
 -1 0 8 34.2 1.21
 1 0 -8 30.54 1.17
 1 0 -8 31.11 1.26
 -1 0 7 1164.52 37.62
 -1 0 7 1052.54 36.79
 1 0 -7 1149.54 36.65
 1 0 -7 1280.87 36.65
 -1 0 6 353.13 10.78
 -1 0 6 356.76 11.07
 1 0 -6 353.42 11.09
 1 0 -6 324.57 10.81
 -1 0 5 184.51 5.93
 1 0 -5 186.05 5.83
 1 0 -5 177.33 6.13
 -1 0 4 113.09 3.72
 -1 0 4 121.27 4.02
 1 0 -4 124.5 4.08
 1 0 -4 120.07 4.05
 -1 0 3 25.44 0.91
 -1 0 3 27.82 1.04
 1 0 -2 2019.82 64.52
 -1 0 1 165.02 5.38
 -1 0 1 150.85 5.51
 1 0 -1 168.69 5.48
 1 0 -1 151.74 5.51
 -1 0 0 9999 304.35
 -1 0 -1 392.95 14.63
 -1 0 -1 460.1 14.5
 1 0 1 488.37 14.02
 -1 0 -2 119.47 5.65
 1 0 2 97.2 5.45
 -1 0 -3 25.83 0.82
 -1 0 -3 21.88 0.79
 1 0 3 21.29 0.79
 1 0 3 26.06 0.93
 -1 0 -4 5.01 0.21
 1 0 4 6.03 0.24
 -1 0 -5 232.02 8.41
 -1 0 -5 264.01 8.31
 1 0 5 294.23 8.3
 1 0 5 282.95 8.21
 -1 0 -6 282.49 7.9
 -1 0 -6 233.87 8.04
 1 0 6 267.22 7.95
 1 0 6 242.32 8.13
 -1 0 -7 1007.14 32.52
 1 0 7 1095.83 32.42
 -1 0 -8 31.86 1.09
 -1 0 -8 29.43 1.08
 1 0 8 26.97 1.01
 1 0 8 30.28 1.01
 -1 0 -9 166.54 5.23
 -1 0 -9 163.35 5.38
 1 0 9 163.26 5.39
 1 0 9 175.89 5.28
 -1 0 -10 476.25 14.44
 -1 0 -10 451.54 14.35
 1 0 10 459.77 14.45
 1 0 10 474.85 14.23
 -1 0 -11 128.7 4.22
 -1 0 -11 122.07 3.99
 1 0 11 120.1 4.07
 1 0 11 128.86 3.97
 -1 0 -12 8.85 0.44
 1 0 12 10.38 0.43
 1 0 12 9.75 0.45
 -1 0 -13 17.26 0.73
 -1 0 -13 15.96 0.64
 1 0 13 15.7 0.64
 1 0 13 14.65 0.6
 -1 0 -14 73.55 2.62
 -1 0 -14 72.17 2.48
 1 0 14 77.14 2.63
 1 0 14 77.7 2.63
 -1 0 -15 24.99 1.44
 -1 0 -15 26.91 1.33
 1 0 15 28.62 1.43
 -1 0 -16 18.44 0.77
 1 0 16 16.4 0.77
 -1 0 -17 0.41 0.41
 1 0 17 0.36 0.32
 -1 1 19 2.85 0.59
 -1 -1 19 1.52 0.61
 1 1 -18 5.64 0.61
 1 -1 -18 5.66 0.63
 -1 -1 18 5.11 0.65
 -1 1 17 0.23 0.31
 -1 1 17 0.19 0.42
 1 1 -17 0.28 0.46
 1 1 -17 0.25 0.41
 1 -1 -17 0.21 0.46
 1 -1 -17 0.38 0.37
 -1 -1 17 0.3 0.38
 -1 -1 17 0.34 0.44
 -1 1 16 1.81 0.41
 -1 1 16 1.4 0.35
 1 1 -16 1.42 0.36
 1 1 -16 1.91 0.28
 1 -1 -16 1.85 0.42
 1 -1 -16 1.81 0.45
 -1 -1 16 1.58 0.35
 -1 -1 16 1.5 0.36
 -1 1 15 145.98 5.08
 -1 1 15 149.19 5.03
 1 1 -15 144.2 4.99
 1 1 -15 148.05 5.34
 1 -1 -15 137.41 4.74
 1 -1 -15 151.15 5.16
 -1 -1 15 139.92 4.76
 -1 -1 15 153.11 5.06
 -1 1 14 127.35 4.4
 -1 1 14 125 4.36
 1 1 -14 124.31 4.32
 1 1 -14 115.9 4.31
 1 -1 -14 116.51 4.16
 1 -1 -14 111.68 4.41
 -1 -1 14 119.69 4.38
 -1 -1 14 125.59 4.19
 -1 1 13 103.85 3.83
 -1 1 13 122.23 4.49
 1 1 -13 111.05 4.2
 1 1 -13 98.1 4.02
 1 -1 -13 129.59 4.43
 1 -1 -13 109.27 4.41
 -1 -1 13 112.21 4.07
 -1 -1 13 113.58 4.16
 -1 1 12 28.42 2.47
 1 1 -12 44.41 2.69
 1 1 -12 38.67 2.73
 1 -1 -12 34.22 2.48
 1 -1 -12 39.19 2.19
 -1 -1 12 44.36 2.38
 -1 -1 12 45.72 2.86
 -1 1 11 28.76 1.13
 -1 1 11 31.73 1.29
 1 1 -11 27.62 1.21
 1 1 -11 28.56 1.26
 1 -1 -11 31.12 1.3
 1 -1 -11 29.21 1.25
 -1 -1 11 30.91 1.25
 -1 -1 11 31 1.17
 -1 1 10 306.04 9.69
 -1 1 10 311.24 9.83
 1 1 -10 297.93 9.67
 1 1 -10 295.98 10.3
 1 -1 -10 314.05 9.99
 1 -1 -10 307.02 10.12
 -1 -1 10 311.06 9.75
 -1 -1 10 311.03 9.6
 -1 1 9 89.21 2.9
 -1 1 9 90.78 3
 1 1 -9 92.19 3.27
 1 1 -9 89.82 3.04
 1 -1 -9 89.13 3
 1 -1 -9 90.05 3.07
 -1 -1 9 88.87 2.92
 -1 -1 9 89.08 2.99
 1 1 -8 96.53 3.53
 1 1 -8 98.1 3.23
 -1 -1 8 98.34 3.28
 -1 -1 8 96.33 3.56
 1 1 -7 83.82 2.96
 1 1 -7 77.58 3.17
 -1 -1 7 82.43 2.92
 -1 -1 7 90.93 3.13
 -1 1 6 14.59 0.58
 -1 1 6 17.63 0.7
 1 1 -6 15.83 0.7
 1 1 -6 14.38 0.63
 1 -1 -6 16.98 0.67
 1 -1 -6 13.69 0.64
 -1 -1 6 14.66 0.57
 -1 -1 6 14.6 0.61
 -1 1 5 26.9 1.65
 -1 1 5 30.63 1.83
 1 1 -5 28.95 1.76
 1 1 -5 31.31 1.86
 1 -1 -5 37.24 1.86
 -1 -1 5 34.57 1.58
 -1 1 4 8.51 0.48
 -1 1 4 7.85 0.47
 1 1 -4 7.77 0.41
 1 1 -4 7.46 0.41
 1 -1 -4 6.44 0.36
 1 -1 -4 8.64 0.52
 -1 -1 4 6.86 0.32
 -1 -1 4 7.46 0.39
 -1 1 3 179.81 6.45
 -1 1 3 207.07 6.36
 1 -1 -3 205.38 6.36
 1 -1 -3 193.89 6.61
 -1 -1 3 165.74 6.32
 -1 -1 3 200.05 6.77
 1 1 -2 2306.86 67.16
 -1 -1 2 1973.12 67.53
 -1 1 0 128.6 4.48
 -1 1 0 148.67 4.73
 1 1 0 152.39 4.5
 1 1 0 135.66 4.41
 1 -1 0 141.42 4.55
 1 -1 0 135.6 4.51
 -1 -1 0 140.52 4.38
 -1 -1 0 139.88 4.57
 -1 1 -1 2442.59 75.92
 -1 1 -1 2246.54 75.27
 1 -1 1 2479.84 75.93
 -1 -1 -1 2387.38 75.03
 -1 1 -2 1455.16 46.86
 1 1 2 1512.3 46.35
 1 1 2 1459.2 46.69
 1 1 3 354.31 12.39
 1 1 3 440.44 12.39
 1 -1 3 363.65 12.25
 1 -1 3 404.45 12.3
 -1 -1 -3 427.92 12.49
 -1 1 -4 0.93 0.16
 -1 1 -4 0.06 0.14
 1 1 4 0.15 0.08
 1 1 4 0.24 0.1
 1 -1 4 0.24 0.16
 1 -1 4 0.47 0.19
 -1 -1 -4 0.62 0.1
 -1 -1 -4 0.2 0.07
 -1 1 -5 237.1 7.85
 -1 1 -5 268.49 7.66
 1 1 5 228.17 7.5
 1 1 5 263.54 7.42
 1 -1 5 252.68 7.79
 -1 -1 -5 233.65 7.53
 -1 -1 -5 217.46 7.46
 -1 1 -6 16.35 0.58
 -1 1 -6 13.29 0.59
 1 -1 6 15.65 0.59
 1 -1 6 16.27 0.59
 -1 -1 -6 15.2 0.5
 -1 1 -7 94.59 3.48
 -1 1 -7 94 3.39
 1 -1 7 101.58 3.34
 1 -1 7 83.96 3.35
 -1 1 -8 173.24 5.49
 -1 1 -8 165.93 5.64
 1 -1 8 178.84 5.52
 1 -1 8 179.24 5.62
 -1 1 -9 21.76 0.85
 -1 1 -9 17.23 0.83
 1 -1 9 18.99 0.81
 1 -1 9 18.99 0.84
 -1 -1 -9 21.68 0.65
 -1 -1 -9 20.33 0.68
 -1 1 -10 228.29 7.01
 -1 1 -10 201.97 6.95
 1 1 10 208.73 6.74
 1 1 10 235.85 6.64
 1 -1 10 201.86 6.76
 1 -1 10 217.51 6.94
 -1 -1 -10 231.06 6.75
 -1 -1 -10 209.66 6.67
 -1 1 -11 30.59 1.13
 -1 1 -11 28.47 1.17
 1 1 11 29.41 1.01
 1 1 11 30.59 0.97
 1 -1 11 30.45 1.09
 1 -1 11 29.88 1.07
 -1 -1 -11 33.84 1.04
 -1 -1 -11 28.5 1.01
 -1 1 -12 379.39 12.24
 -1 1 -12 391.2 12.13
 1 1 12 354.22 11.67
 1 1 12 398.66 11.67
 1 -1 12 391.01 12.14
 1 -1 12 409.81 12.22
 -1 -1 -12 393.25 11.87
 -1 -1 -12 361.39 11.71
 -1 1 -13 343.78 11.22
 -1 1 -13 335.87 10.76
 1 1 13 328.38 10.55
 1 1 13 369.2 10.59
 1 -1 13 324.72 10.99
 1 -1 13 346.17 10.93
 -1 -1 -13 372.3 10.68
 -1 -1 -13 344.9 10.53
 -1 1 -14 19.15 1.04
 1 -1 14 19.73 0.94
 1 -1 14 14.13 0.95
 -1 1 -15 46.85 1.75
 -1 1 -15 39.85 1.66
 1 -1 15 37.57 1.62
 -1 1 -16 10.9 0.87
 1 -1 16 12.9 0.86
 -1 1 -17 15.38 1.05
 1 -1 17 18.25 0.99
 -1 2 20 45.06 1.76
 1 2 -20 44.1 1.88
 1 -2 -20 45.16 1.88
 -1 2 19 1.81 0.64
 1 2 -19 1.77 0.6
 -1 2 18 5.63 0.5
 -1 -2 18 7.47 0.6
 -1 2 17 -0.4 0.39
 1 2 -17 0 0.34
 1 -2 -17 -0.08 0.41
 -1 -2 17 0.01 0.38
 -1 2 16 40.02 1.66
 -1 2 16 39.05 1.52
 1 2 -16 36.68 1.7
 1 2 -16 43.78 2.03
 1 -2 -16 37.14 1.5
 1 -2 -16 31.64 1.83
 -1 -2 16 44.62 1.97
 -1 -2 16 40.82 1.7
 -1 2 15 157.89 5.54
 -1 2 15 166.95 5.41
 1 2 -15 165.07 5.95
 1 2 -15 168.23 5.41
 1 -2 -15 168.1 5.81
 1 -2 -15 166.69 5.43
 -1 -2 15 161.66 5.81
 -1 -2 15 178.24 5.67
 -1 2 14 7.44 0.44
 -1 2 14 8.85 0.57
 1 2 -14 8.83 0.56
 1 2 -14 9.06 0.58
 1 -2 -14 7.3 0.57
 1 -2 -14 7.28 0.65
 -1 -2 14 7.84 0.47
 -1 -2 14 8.82 0.62
 -1 2 13 225.17 7.56
 -1 2 13 229.73 7.41
 1 2 -13 219 7.33
 1 2 -13 224.27 7.61
 1 -2 -13 228.27 7.76
 1 -2 -13 228.32 8.08
 -1 -2 13 220.52 7.29
 -1 -2 13 223.67 7.4
 -1 2 12 19.04 1.35
 -1 2 12 15.23 1.35
 1 2 -12 22.52 1.58
 1 2 -12 17.05 1.51
 1 -2 -12 19.59 1.52
 1 -2 -12 26.5 1.69
 -1 -2 12 21.17 1.65
 -1 -2 12 17.91 1.43
 -1 2 11 238.44 7.64
 -1 2 11 247.51 7.66
 1 2 -11 235.77 7.73
 1 2 -11 232.32 7.71
 1 -2 -11 231.55 7.85
 1 -2 -11 231.9 7.53
 -1 -2 11 250.3 7.86
 -1 -2 11 246.89 7.83
 -1 2 10 2.82 0.3
 -1 2 10 2.47 0.39
 1 2 -10 2.61 0.41
 1 2 -10 3.02 0.43
 1 -2 -10 2.37 0.35
 1 -2 -10 2.63 0.34
 -1 -2 10 3.12 0.32
 -1 -2 10 1.83 0.39
 -1 2 9 80.56 2.81
 -1 2 9 80.41 2.79
 1 2 -9 93.32 3.05
 1 -2 -9 80.48 3.02
 1 -2 -9 82.22 2.96
 -1 -2 9 91.71 3.13
 -1 2 8 57.03 1.85
 -1 2 8 56.69 1.92
 1 2 -8 55.69 1.96
 1 2 -8 55.93 1.97
 1 -2 -8 57.83 2.21
 1 -2 -8 57.95 2.02
 -1 -2 8 57.06 1.98
 -1 -2 8 58.76 2.01
 -1 2 7 98.21 3.2
 1 2 -7 100.65 3.45
 1 2 -7 95.02 3.31
 1 -2 -7 91.62 3.13
 -1 -2 7 97.18 3.23
 -1 -2 7 101.84 3.41
 -1 2 6 369.69 11.74
 -1 2 6 393.29 11.85
 1 2 -6 377.69 12.18
 1 2 -6 371.79 12.32
 1 -2 -6 368.74 11.68
 1 -2 -6 389.6 12.14
 -1 -2 6 358.42 11.71
 -1 -2 6 391.57 12.19
 -1 2 5 2.75 0.24
 -1 2 5 2.33 0.27
 1 2 -5 3.48 0.35
 1 2 -5 3.44 0.37
 1 -2 -5 2.51 0.29
 1 -2 -5 3.59 0.35
 -1 -2 5 3.53 0.27
 -1 -2 5 2.41 0.38
 -1 2 4 14.45 0.6
 -1 2 4 17.07 0.8
 1 2 -4 17.71 0.69
 1 -2 -4 17.66 0.83
 1 -2 -4 14.2 0.65
 -1 -2 4 17.27 0.62
 -1 2 3 36.1 1.49
 -1 2 3 40.21 1.54
 1 2 -3 38.14 1.36
 1 -2 -3 42.74 1.46
 1 -2 -3 36.57 1.43
 -1 2 2 1715.3 60.39
 -1 2 2 1987.55 60.47
 1 2 -2 1860.2 60.75
 1 2 -2 2030.13 60.72
 -1 -2 2 1854 60.37
 -1 -2 2 2022.06 61.65
 1 2 -1 892.3 30.22
 1 2 -1 974.45 29.22
 -1 -2 1 901.93 29.56
 -1 -2 1 981.27 30.72
 -1 2 0 169.36 5.56
 -1 2 0 156.76 5.28
 1 2 0 177.8 5.57
 1 2 0 175.76 5.56
 1 -2 0 168.61 5.29
 1 -2 0 164.57 5.44
 -1 -2 0 180.21 5.46
 -1 -2 0 171.81 5.48
 -1 2 -1 821.23 28.19
 1 2 1 922.34 28.89
 1 -2 1 842.86 28.72
 -1 -2 -1 996.53 28.47
 -1 -2 -1 936.58 28.44
 -1 2 -2 792.98 24.89
 1 2 2 773.74 24.33
 1 -2 2 757.93 25.12
 -1 -2 -2 764.4 24.69
 -1 2 -3 39.93 1.32
 -1 2 -3 38.34 1.29
 1 2 3 39.09 1.33
 1 2 3 42.22 1.32
 1 -2 3 38.99 1.33
 1 -2 3 40.84 1.31
 -1 -2 -3 39.94 1.33
 -1 -2 -3 38.38 1.34
 1 2 4 8.51 0.31
 1 -2 4 10.33 0.45
 1 -2 4 9.43 0.41
 -1 -2 -4 9.27 0.34
 -1 -2 -4 7.65 0.3
 -1 2 -5 20.53 0.78
 -1 2 -5 19.95 0.71
 1 -2 5 21.51 0.8
 1 -2 5 20.16 0.79
 -1 2 -6 140.2 4.4
 -1 2 -6 126.38 4.57
 1 -2 6 131.48 4.6
 1 -2 6 142.72 4.31
 -1 2 -7 108.19 3.56
 -1 2 -7 110.27 3.6
 1 -2 7 108.63 3.48
 1 -2 7 103.15 3.41
 -1 2 -8 0.57 0.35
 1 -2 8 1.29 0.3
 1 -2 8 0.29 0.19
 -1 2 -9 16.76 1.01
 -1 2 -9 12.15 0.81
 1 -2 9 12.89 0.95
 1 -2 9 15.59 0.87
 -1 2 -10 26.25 1.05
 -1 2 -10 21.48 0.99
 1 -2 10 28.05 1
 1 -2 10 24.55 1.02
 -1 2 -11 199.72 6.09
 -1 2 -11 189.11 6.26
 1 -2 11 177.64 6.14
 1 -2 11 194.34 6.3
 -1 2 -12 246.11 7.8
 -1 2 -12 229.63 7.54
 1 -2 12 218.99 7.73
 1 -2 12 237.65 7.36
 -1 2 -13 130.63 4.22
 -1 2 -13 122.23 4.33
 1 -2 13 113.05 4.11
 -1 2 -14 5.51 0.49
 -1 2 -14 4.47 0.42
 1 -2 14 5.02 0.43
 1 -2 14 4.2 0.38
 -1 2 -15 7.49 0.7
 1 -2 15 7.79 0.79
 -1 2 -16 1.96 0.67
 -1 2 -16 2.57 0.45
 1 -2 16 2.12 0.67
 -1 2 -17 10.68 0.96
 1 -2 17 12.57 1.01
 1 -2 17 10.68 0.85
 1 -2 18 2.83 0.77
 -1 3 20 17.91 1.39
 1 3 -19 0.61 0.64
 1 3 -19 -1.12 0.87
 1 -3 -19 0.61 0.72
 1 3 -18 0.08 0.21
 -1 3 17 6.93 0.43
 1 3 -17 6.37 0.66
 1 -3 -17 5.9 0.5
 -1 -3 17 4.89 0.5
 -1 -3 17 6.56 0.6
 -1 3 16 6.84 0.53
 1 3 -16 5.71 0.64
 1 3 -16 4.97 0.58
 1 -3 -16 6.42 0.59
 -1 -3 16 5.88 0.47
 -1 -3 16 5.23 0.58
 -1 3 15 0.06 0.59
 -1 3 15 0.14 0.46
 1 3 -15 0.36 0.36
 1 3 -15 0.21 0.62
 1 -3 -15 -0.2 0.58
 -1 -3 15 0.25 0.58
 -1 -3 15 0.53 0.46
 -1 3 14 8.4 0.47
 -1 3 14 9.06 0.63
 1 3 -14 8.29 0.65
 1 3 -14 8.76 0.55
 1 -3 -14 9.29 0.74
 -1 -3 14 9.43 0.6
 -1 -3 14 9.32 0.58
 -1 3 13 11.6 0.53
 -1 3 13 11.16 0.55
 1 3 -13 11.83 0.65
 1 3 -13 12.82 0.67
 1 -3 -13 11.01 0.73
 -1 -3 13 11.64 0.55
 -1 -3 13 11.2 0.59
 -1 3 12 98.5 3.27
 -1 3 12 97.48 3.16
 1 3 -12 96.28 3.48
 1 3 -12 105.1 3.57
 1 -3 -12 95.48 3.27
 1 -3 -12 89.69 3.42
 -1 -3 12 98.64 3.29
 -1 -3 12 97.02 3.3
 -1 3 11 39.06 1.39
 -1 3 11 36.27 1.47
 1 -3 -11 37.43 1.49
 1 -3 -11 39.57 1.51
 -1 3 10 53.83 1.79
 -1 3 10 55.73 1.95
 1 3 -10 52.33 1.9
 1 3 -10 55.99 2
 1 -3 -10 53.09 1.99
 1 -3 -10 55.34 2.1
 -1 -3 10 56.27 2.02
 -1 -3 10 59.61 2.08
 -1 3 9 73.84 2.46
 -1 3 9 76.8 2.56
 1 3 -9 70 2.54
 1 3 -9 70.79 2.64
 1 -3 -9 75.75 2.65
 1 -3 -9 72.64 2.62
 -1 -3 9 74.54 2.62
 -1 -3 9 74.78 2.58
 -1 3 8 2.14 0.32
 -1 3 8 1.77 0.35
 1 3 -8 1.33 0.35
 1 3 -8 1.25 0.37
 1 -3 -8 2.05 0.4
 1 -3 -8 1.76 0.37
 -1 -3 8 2.23 0.32
 -1 -3 8 1.85 0.38
 -1 3 7 55.82 1.89
 -1 3 7 51.76 1.95
 1 3 -7 45.55 1.86
 1 3 -7 50.82 1.97
 1 -3 -7 53.39 1.77
 1 -3 -7 50.12 1.8
 -1 -3 7 51.24 1.72
 -1 -3 7 47.91 1.74
 -1 3 6 4.47 0.5
 -1 3 6 3.85 0.65
 1 3 -6 7.5 0.88
 1 -3 -6 4.93 0.62
 1 -3 -6 4.04 0.48
 -1 -3 6 6.39 0.8
 -1 3 5 226.65 7.31
 -1 3 5 237.28 7.18
 1 3 -5 223.25 7.28
 1 3 -5 237.11 7.88
 1 -3 -5 224.1 7.28
 1 -3 -5 215.88 7.49
 -1 -3 5 230.16 7.46
 -1 -3 5 217.04 7.23
 -1 3 4 113.72 4.14
 -1 3 4 127.41 4.36
 1 -3 -4 132.7 4.59
 1 -3 -4 129.87 4.43
 -1 -3 4 129.04 4.47
 -1 3 3 41.8 1.64
 -1 3 3 49.74 1.74
 1 3 -3 45.44 1.67
 1 3 -3 50.3 1.8
 1 -3 -3 45.11 1.6
 1 -3 -3 47.38 1.7
 -1 3 2 27.35 1.15
 1 3 -2 27.7 1.16
 1 3 -2 29.58 1.2
 -1 -3 2 27.02 1.11
 -1 -3 2 26.55 0.99
 1 3 -1 83.25 3.98
 -1 -3 1 90.15 3.81
 -1 -3 1 70.2 3.54
 -1 3 0 514.85 18.09
 -1 3 0 594.9 17.84
 1 3 0 572.45 18.61
 1 -3 0 573.63 18.31
 -1 -3 0 584.16 18.36
 -1 3 -1 398.48 12.35
 1 3 1 369.24 12.45
 1 -3 1 407.06 13.42
 1 -3 1 437.76 12.62
 -1 -3 -1 419.37 12.61
 -1 -3 -1 376.81 12.62
 -1 3 -2 55.03 1.72
 -1 3 -2 55.08 1.81
 1 3 2 57.57 1.77
 1 3 2 50.6 1.73
 1 -3 2 53.15 1.74
 1 -3 2 52.22 1.74
 -1 -3 -2 49.37 1.68
 -1 -3 -2 54.9 1.73
 -1 3 -3 49.34 1.74
 -1 3 -3 47.35 1.62
 1 3 3 51.24 1.78
 1 3 3 46.46 1.68
 1 -3 3 51.41 1.67
 1 -3 3 52 1.78
 -1 -3 -3 50.63 1.71
 -1 -3 -3 51.19 1.66
 -1 3 -4 370.91 11.55
 -1 3 -4 352.8 11.25
 1 -3 4 368.73 11.41
 1 -3 4 388 11.55
 -1 -3 -4 309.53 11.12
 -1 3 -5 119.73 3.87
 -1 3 -5 98.67 3.57
 1 -3 5 112.5 3.74
 1 -3 5 119.62 3.6
 -1 3 -6 107.96 3.55
 -1 3 -6 109.69 3.54
 1 -3 6 113.29 3.53
 1 -3 6 107.81 3.54
 -1 3 -7 29.16 1.12
 -1 3 -7 31.66 1.2
 1 -3 7 31.69 1.1
 1 -3 7 32.79 1.16
 -1 3 -8 42.7 1.53
 -1 3 -8 39.01 1.58
 1 -3 8 39.93 1.44
 1 -3 8 43.14 1.56
 -1 3 -9 57.86 1.96
 -1 3 -9 52.42 1.89
 1 -3 9 50.93 1.8
 1 -3 9 53.81 1.87
 -1 3 -10 6.46 0.6
 -1 3 -10 4.77 0.46
 1 -3 10 8.07 0.58
 1 -3 10 6.08 0.47
 -1 3 -11 154.71 5.46
 1 -3 11 166.38 5.83
 1 -3 11 136.88 5.58
 -1 3 -12 4.89 0.61
 1 -3 12 6.2 0.67
 -1 3 -13 5.19 0.39
 -1 3 -13 3.29 0.38
 1 -3 13 5 0.4
 1 -3 13 3.6 0.37
 -1 3 -14 5.5 0.47
 -1 3 -14 5.42 0.48
 1 -3 14 4.42 0.47
 1 -3 14 4.99 0.5
 -1 3 -15 28.49 1.29
 -1 3 -15 26.45 1.15
 1 -3 15 29.2 1.25
 1 -3 15 26.94 1.26
 -1 3 -16 23.78 1.22
 -1 3 -16 18.03 0.92
 1 -3 16 22.84 1.09
 -1 3 -17 0.08 0.47
 1 -3 17 1.64 0.67
 1 -3 18 12.59 1.1
 1 -3 18 8.46 1.12
 1 -3 19 8.2 0.89
 -1 4 20 50.72 2.52
 1 4 -20 50.18 2.18
 1 4 -20 49.88 2.62
 1 -4 -20 58.87 2.19
 1 4 -18 13.9 0.93
 1 4 -18 13.17 1.27
 -1 -4 18 16.18 1.49
 -1 4 17 0.42 0.27
 -1 4 17 0.78 0.35
 1 -4 -17 1.21 0.41
 -1 -4 17 1.2 0.39
 -1 -4 17 1.57 0.73
 -1 4 16 37.38 1.46
 -1 4 16 36.26 1.58
 1 4 -16 37.06 1.67
 1 4 -16 36.57 1.68
 1 -4 -16 39.21 1.47
 -1 -4 16 40.26 1.55
 -1 4 15 18.42 0.87
 1 4 -15 19.75 0.95
 1 4 -15 17.12 0.86
 1 -4 -15 17.2 0.87
 1 -4 -15 18.09 1.23
 -1 -4 15 17.71 0.82
 -1 -4 15 21.18 1.02
 -1 4 14 2.17 0.28
 -1 4 14 1.78 0.35
 1 4 -14 1.92 0.36
 1 4 -14 1.8 0.46
 1 -4 -14 1.8 0.32
 1 -4 -14 1.83 0.35
 -1 -4 14 1.96 0.36
 -1 -4 14 1.93 0.29
 -1 4 13 17.75 0.86
 -1 4 13 19.09 0.99
 1 -4 -13 16.2 0.91
 1 -4 -13 17.67 0.9
 -1 4 12 19.37 0.82
 -1 4 12 19.38 0.95
 1 4 -12 18.38 0.87
 1 4 -12 19.79 1.06
 1 -4 -12 18.79 0.9
 1 -4 -12 18.85 0.96
 -1 -4 12 19.18 0.89
 -1 -4 12 21.74 0.94
 -1 4 11 129.17 4.25
 -1 4 11 127.49 4.2
 1 4 -11 131.32 4.38
 1 4 -11 133.42 4.48
 1 -4 -11 132 4.4
 1 -4 -11 131.84 4.58
 -1 -4 11 134.57 4.5
 -1 -4 11 131.85 4.44
 -1 4 10 456.8 14.11
 -1 4 10 456.49 14.07
 1 4 -10 447.78 14.44
 1 4 -10 463.65 14.84
 1 -4 -10 454.25 14.33
 1 -4 -10 456.9 14.6
 -1 -4 10 450.04 14.46
 -1 -4 10 450.55 14.3
 -1 4 9 2.42 0.27
 -1 4 9 2.45 0.26
 1 4 -9 2.24 0.3
 1 4 -9 3.09 0.36
 1 -4 -9 2.27 0.25
 1 -4 -9 2.74 0.3
 -1 -4 9 2.86 0.28
 -1 -4 9 2.83 0.28
 -1 4 8 288.16 10
 -1 4 8 289.43 9.96
 1 4 -8 335.18 10.03
 1 4 -8 338.66 10.17
 1 -4 -8 293.18 10.15
 1 -4 -8 286 10.22
 -1 -4 8 329.62 10.01
 -1 -4 8 338.04 9.99
 -1 4 7 426.53 13.46
 -1 4 7 461.84 13.84
 1 4 -7 432.97 13.94
 1 4 -7 444.06 14.04
 1 -4 -7 437.76 13.55
 1 -4 -7 405.44 13.39
 -1 -4 7 431.92 13.74
 -1 -4 7 424.35 13.77
 -1 4 6 55.29 2.59
 -1 4 6 53.92 3.02
 1 4 -6 57.39 2.67
 1 4 -6 46.16 2.95
 1 -4 -6 52.72 2.58
 -1 -4 6 48.56 2.82
 -1 -4 6 52.86 2.91
 -1 4 5 47.68 2.2
 -1 4 5 62.52 2.11
 1 4 -5 57.91 2.01
 1 4 -5 55.67 2.23
 1 -4 -5 48.87 2.11
 -1 -4 5 55.53 2.03
 -1 -4 5 56.17 2.18
 -1 4 4 14.71 0.75
 -1 4 4 20.4 1.3
 1 -4 -4 18.79 1.12
 -1 4 3 252.4 8.68
 -1 4 3 261.11 8.98
 1 4 -3 306.28 9.06
 1 4 -3 285.87 8.98
 1 -4 -3 255.98 8.67
 1 -4 -3 250.53 8.54
 -1 -4 3 301.12 9.01
 -1 -4 3 297.37 8.8
 -1 4 2 6.07 0.63
 1 4 -2 8.96 0.79
 1 4 -2 6.15 0.79
 1 -4 -2 5.03 0.77
 -1 -4 2 9.92 0.83
 -1 -4 2 11.06 0.91
 1 4 -1 108.88 3.32
 1 4 -1 94.95 3.31
 -1 -4 1 92.71 3.34
 -1 -4 1 107.47 3.41
 -1 4 0 28.51 1.06
 -1 4 0 30.46 1.12
 1 4 0 30.83 1.02
 1 4 0 28.3 1.02
 1 -4 0 30.87 1.26
 1 -4 0 26.76 1.07
 -1 -4 0 32.47 1.16
 -1 -4 0 29.01 1.03
 -1 4 -1 142.67 4.68
 -1 4 -1 129.45 4.42
 1 4 1 143.5 4.36
 1 4 1 139.18 4.5
 1 -4 1 135 4.37
 1 -4 1 137.81 4.42
 -1 -4 -1 137.5 4.41
 -1 -4 -1 141.9 4.36
 -1 4 -2 140.77 4.65
 -1 4 -2 142.47 4.62
 1 4 2 148.09 4.61
 1 -4 2 145.4 4.64
 1 -4 2 142.99 4.54
 -1 -4 -2 153.95 4.83
 -1 -4 -2 141.81 4.62
 -1 4 -3 120.85 4.72
 1 -4 3 124.96 4.63
 1 -4 3 126.06 4.52
 -1 4 -4 219.19 6.9
 -1 4 -4 213.21 6.93
 1 4 4 204.88 6.66
 1 4 4 211.86 6.51
 1 -4 4 221.88 6.63
 1 -4 4 221 6.9
 -1 -4 -4 211.36 6.57
 -1 -4 -4 200.84 6.61
 -1 4 -5 230.41 7.31
 -1 4 -5 235.37 7.22
 1 4 5 212.68 7.08
 1 4 5 218.18 6.99
 1 -4 5 238.47 7.24
 1 -4 5 243.3 7.46
 -1 -4 -5 227.54 6.92
 -1 -4 -5 218.53 7.11
 -1 4 -6 542.74 16.79
 -1 4 -6 545.1 16.63
 1 -4 6 515.61 16.49
 1 -4 6 519.09 16.48
 -1 4 -7 71.97 2.96
 -1 4 -7 74.7 2.87
 1 -4 7 64.53 2.77
 1 -4 7 79.41 3.16
 -1 4 -8 66.87 2.74
 -1 4 -8 70.05 2.81
 1 -4 8 68.71 3.04
 1 -4 8 70.17 2.76
 -1 4 -9 0.03 0.26
 -1 4 -9 -0.03 0.23
 1 -4 9 0.06 0.25
 1 -4 9 -0.04 0.23
 -1 4 -10 57.18 2.87
 1 -4 10 56.14 2.53
 1 -4 10 42.12 2.24
 -1 4 -11 44.77 1.68
 -1 4 -11 40.01 1.75
 1 -4 11 44.73 1.58
 1 -4 11 40.13 1.66
 -1 4 -12 27.64 1.21
 1 -4 12 30.32 1.23
 1 -4 12 30.28 1.3
 -1 4 -13 60.98 3.84
 -1 4 -13 67.47 3.48
 1 -4 13 73.23 3.65
 1 -4 13 67.91 3.41
 -1 4 -14 0.36 0.41
 -1 4 -14 -0.08 0.36
 1 -4 14 0.58 0.42
 1 -4 14 -0.35 0.36
 -1 4 -15 1.02 0.56
 -1 4 -15 0.08 0.59
 1 -4 15 1.45 0.52
 1 -4 15 -0.35 0.56
 -1 4 -16 6.5 0.78
 -1 4 -16 4.7 0.57
 1 -4 16 5.62 0.68
 1 -4 16 3.49 0.6
 1 -4 17 2.03 0.7
 1 -4 18 14.37 1.22
 1 5 -19 217.69 7.82
 1 5 -19 254.57 8.92
 1 -5 -19 251 8.94
 1 -5 -19 243.75 7.76
 -1 -5 19 248.7 7.65
 -1 -5 19 260.79 9.2
 -1 5 18 25.74 1.54
 -1 5 18 22.8 1.49
 1 5 -18 27.74 1.52
 1 -5 -18 28.32 1.97
 -1 -5 18 21.78 1.48
 -1 5 17 1.39 0.41
 -1 5 17 1.38 0.55
 1 5 -17 0.89 0.7
 1 5 -17 1.44 0.65
 1 -5 -17 1.55 0.56
 -1 -5 17 1.73 0.47
 -1 5 16 9.35 0.89
 1 5 -16 10.02 1
 1 -5 -16 9.1 0.9
 -1 -5 16 9.52 0.79
 -1 5 15 2.58 0.32
 -1 5 15 3.14 0.36
 1 5 -15 3.55 0.55
 1 5 -15 3.11 0.43
 1 -5 -15 2.88 0.41
 1 -5 -15 2.58 0.43
 -1 -5 15 3.76 0.45
 -1 -5 15 2.69 0.6
 -1 5 14 145.07 4.73
 -1 5 14 150.63 5.05
 1 5 -14 151.51 5.35
 1 5 -14 146.2 4.87
 1 -5 -14 148.37 5
 1 -5 -14 148.96 5.08
 -1 -5 14 141.74 5.29
 -1 -5 14 160.3 5.93
 -1 5 13 38.19 1.48
 -1 5 13 40.69 1.38
 1 5 -13 38.13 1.51
 1 5 -13 41.83 1.75
 1 -5 -13 40.26 1.65
 1 -5 -13 39.72 1.47
 -1 -5 13 40.18 1.61
 -1 -5 13 37.06 1.5
 -1 5 12 318.15 10.19
 -1 5 12 340.28 10.62
 1 5 -12 334.76 11.01
 1 5 -12 333.73 10.81
 1 -5 -12 315.21 10.61
 1 -5 -12 327.24 10.89
 -1 -5 12 320.78 10.65
 -1 -5 12 337.17 10.49
 -1 5 11 17.38 1.36
 1 5 -11 9.76 0.59
 1 5 -11 12.61 0.69
 -1 -5 11 10.98 0.68
 -1 -5 11 11.56 0.69
 -1 5 10 239.92 8.09
 -1 5 10 246.87 8.45
 1 5 -10 268.03 8.46
 1 5 -10 272.79 8.77
 1 -5 -10 255.15 8.67
 1 -5 -10 234.15 8.25
 -1 -5 10 277.63 8.76
 -1 -5 10 272.92 8.4
 -1 5 9 3.92 0.74
 1 5 -9 7.6 0.91
 1 5 -9 5.46 1.01
 1 -5 -9 4.44 0.75
 -1 -5 9 5.68 0.95
 -1 -5 9 8.96 0.99
 -1 5 8 204.08 6.37
 -1 5 8 201.71 6.58
 1 5 -8 205.79 6.99
 1 5 -8 201.74 6.65
 1 -5 -8 205.15 6.49
 1 -5 -8 198.32 6.58
 -1 -5 8 210.45 6.84
 -1 -5 8 201.6 6.6
 -1 5 7 10.03 0.48
 -1 5 7 9.32 0.5
 1 5 -7 9.05 0.56
 1 5 -7 8.75 0.45
 1 -5 -7 8.89 0.42
 1 -5 -7 8.74 0.51
 -1 -5 7 9.33 0.41
 -1 -5 7 9.12 0.51
 -1 5 6 24.26 1.11
 -1 5 6 27.69 1.43
 1 5 -6 24.76 1.1
 1 5 -6 21.26 1.12
 1 -5 -6 29.19 1.3
 1 -5 -6 20.68 0.96
 -1 -5 6 24.93 1.1
 -1 -5 6 24.75 1.16
 -1 5 5 94.78 3.69
 -1 5 5 107.03 3.94
 1 -5 -5 115.72 3.97
 -1 -5 5 97.08 3.72
 -1 -5 5 102.67 3.66
 -1 5 4 56.92 3.04
 -1 5 4 65.82 3.07
 1 5 -4 49.64 3.1
 1 -5 -4 64.09 3.08
 -1 5 3 500.01 15.14
 -1 5 3 495.32 15.05
 1 5 -3 507 15.72
 1 5 -3 491.33 15.13
 1 -5 -3 446.87 15.35
 1 -5 -3 492.39 15.31
 -1 -5 3 469.7 15.36
 -1 -5 3 481.22 15.39
 -1 5 2 287.24 9.3
 -1 5 2 293.78 9.34
 1 5 -2 307.59 9.25
 1 5 -2 302.91 9.36
 1 -5 -2 285.2 9.31
 1 -5 -2 283.97 9.46
 -1 -5 2 297.27 9.13
 -1 -5 2 296.42 9.52
 -1 5 1 25.77 1.16
 -1 5 1 27.77 1.07
 1 5 -1 25.97 0.94
 1 5 -1 29.57 1.12
 -1 -5 1 27.05 1.03
 -1 -5 1 26.47 1.1
 1 5 0 77.48 3.14
 1 5 0 81.2 3.27
 -1 -5 0 85.12 3.26
 -1 -5 0 76.59 3.14
 -1 5 -1 9.27 0.43
 -1 5 -1 9.69 0.45
 1 -5 1 8.5 0.43
 1 -5 1 8.22 0.4
 -1 5 -2 232.83 7.53
 -1 5 -2 231.95 7.44
 1 5 2 208.65 7.22
 1 5 2 243.55 7.53
 1 -5 2 236.19 7.49
 1 -5 2 232.26 7.39
 -1 -5 -2 226.16 7.24
 -1 -5 -2 230.81 7.42
 -1 5 -3 54.99 2.63
 -1 5 -3 51.21 2.5
 1 5 3 55.36 2.23
 1 -5 3 54.01 2.87
 1 -5 3 49.68 2.65
 -1 -5 -3 49.31 2.33
 -1 5 -4 601.6 17.86
 -1 5 -4 609.36 17.41
 1 5 4 507.28 17.42
 1 -5 4 530.39 17.65
 1 -5 4 568.9 18.09
 -1 -5 -4 556.32 17.33
 -1 -5 -4 538.45 17.45
 -1 5 -5 397.06 12.22
 -1 5 -5 383.54 12.14
 1 5 5 361.67 12.06
 1 5 5 428.7 12.23
 1 -5 5 417.11 12.19
 1 -5 5 374.21 12.24
 -1 -5 -5 353.5 11.93
 -1 -5 -5 409.15 12.14
 -1 5 -6 109.88 3.56
 -1 5 -6 111.33 3.66
 1 5 6 97.96 3.3
 1 5 6 107.25 3.29
 1 -5 6 108.1 3.45
 1 -5 6 109.68 3.53
 -1 -5 -6 101.84 3.24
 -1 -5 -6 98.85 3.35
 -1 5 -7 0.71 0.27
 -1 5 -7 1.33 0.25
 1 5 7 0.47 0.04
 1 -5 7 0.63 0.22
 1 -5 7 0.55 0.24
 -1 -5 -7 0.67 0.08
 -1 -5 -7 0.41 0.08
 -1 5 -8 62.43 2.17
 -1 5 -8 63.23 2.4
 1 -5 8 57.16 2.44
 1 -5 8 59.4 2.24
 -1 5 -9 149.06 5.48
 -1 5 -9 156.3 5.39
 1 -5 9 166.02 5.21
 1 -5 9 163.28 5.47
 -1 5 -10 77.1 3.04
 -1 5 -10 62.36 3
 1 -5 10 79.9 2.86
 1 -5 10 63.39 2.79
 -1 5 -11 3.03 0.44
 -1 5 -11 3.31 0.36
 1 -5 11 3.26 0.46
 1 -5 11 2.52 0.29
 -1 5 -12 56.38 2.42
 -1 5 -12 44.4 2.31
 1 -5 12 61.62 2.32
 1 -5 12 48.22 2.26
 -1 5 -13 10.39 0.66
 -1 5 -13 7.29 0.63
 1 -5 13 10.21 0.64
 1 -5 13 11.29 0.72
 -1 5 -14 45.43 1.82
 -1 5 -14 39.02 1.87
 1 -5 14 36.79 1.73
 1 -5 14 42.03 2.02
 -1 5 -15 18.52 0.96
 -1 5 -15 15.06 0.88
 1 -5 15 16.8 0.86
 1 -5 15 13.92 0.81
 -1 5 -16 116.46 4.37
 -1 5 -16 120.49 4.41
 1 -5 16 121.09 4.2
 1 -5 16 108.46 4.09
 1 -5 17 74.2 2.38
 1 -5 17 63.95 2.65
 1 -5 18 10.16 1.08
 1 -5 18 12.87 1.18
 1 -5 19 45.35 2.29
 -1 6 19 52.88 2.72
 -1 6 19 54.06 2.16
 1 6 -19 61.91 2.44
 1 6 -19 55.85 2.52
 1 -6 -19 62.57 2.35
 -1 -6 19 45.73 2.23
 1 6 -18 14.48 0.88
 1 6 -18 19.01 1.34
 -1 -6 18 13.48 1.24
 -1 -6 18 16.95 1.43
 1 6 -17 -0.13 0.82
 1 -6 -17 0.12 0.62
 -1 -6 17 0.23 0.81
 -1 6 16 6.86 0.48
 -1 6 16 4.69 0.55
 1 6 -16 8.23 0.69
 1 -6 -16 7.52 0.6
 -1 -6 16 7.2 0.44
 -1 6 15 18.51 0.89
 -1 6 15 21.89 1.04
 1 6 -15 21.72 1.1
 1 6 -15 20.05 1.27
 1 -6 -15 22.83 1.11
 1 -6 -15 22.44 1.14
 -1 -6 15 17.8 1.09
 -1 -6 15 24.94 1.34
 -1 6 14 65.16 2.32
 -1 6 14 75.24 2.78
 1 6 -14 65.13 2.68
 1 6 -14 61.01 2.37
 1 -6 -14 67.25 2.59
 1 -6 -14 73.75 2.72
 -1 -6 14 63.23 2.33
 -1 -6 14 56.54 2.48
 -1 6 13 117.94 3.93
 -1 6 13 122.51 3.99
 1 6 -13 118.34 4.29
 1 6 -13 115.7 4
 1 -6 -13 113.25 4.12
 1 -6 -13 113.65 3.94
 -1 -6 13 123.21 4.46
 -1 -6 13 116.94 3.93
 -1 6 12 5.22 0.52
 -1 6 12 6.79 0.62
 1 6 -12 5.39 0.75
 1 6 -12 10.81 0.94
 1 -6 -12 8.65 0.61
 1 -6 -12 5.38 0.64
 -1 -6 12 10.01 0.86
 -1 -6 12 7.1 0.91
 -1 6 11 1227.25 37.09
 -1 6 11 1237.22 37.92
 1 6 -11 1182.71 37.62
 1 6 -11 1225.82 37.52
 1 -6 -11 1131.01 37.57
 1 -6 -11 1260.21 38.89
 -1 -6 11 1228.27 37.82
 -1 -6 11 1208.22 37.63
 -1 6 10 137.85 5.41
 -1 6 10 140.1 6.03
 1 6 -10 127.77 5.62
 1 6 -10 135.95 5.65
 1 -6 -10 135.33 5.31
 1 -6 -10 146.6 5.92
 -1 -6 10 134.17 5.29
 -1 -6 10 134.13 5.77
 -1 6 9 40.48 1.51
 -1 6 9 46.78 1.68
 1 6 -9 44.13 1.74
 1 6 -9 48.02 1.77
 1 -6 -9 48.23 1.71
 1 -6 -9 43.14 1.71
 -1 -6 9 49.33 1.82
 -1 -6 9 46.22 1.77
 -1 6 8 118.41 4.07
 -1 6 8 120.41 3.98
 1 6 -8 117.67 4.27
 1 6 -8 122.56 3.98
 1 -6 -8 124.65 3.97
 1 -6 -8 118.04 4.2
 -1 -6 8 120.84 4.03
 -1 -6 8 115.5 4.1
 -1 6 7 99.76 3.56
 -1 6 7 110.37 3.99
 1 6 -7 112.04 3.72
 1 6 -7 119.24 4
 1 -6 -7 102.27 3.78
 1 -6 -7 98.02 3.53
 -1 -6 7 116.76 3.71
 -1 -6 7 111.96 3.71
 -1 6 6 29.25 2.02
 -1 6 6 35.31 2.05
 1 6 -6 23.4 1.91
 1 6 -6 21.63 2.05
 1 -6 -6 32.64 1.78
 1 -6 -6 32.45 1.93
 -1 -6 6 26.88 1.9
 -1 -6 6 27.99 1.96
 -1 6 5 17.44 0.7
 -1 6 5 19.13 0.77
 1 -6 -5 18.42 0.7
 1 -6 -5 16.9 0.69
 -1 -6 5 16.98 0.72
 -1 -6 5 19.09 0.75
 -1 6 4 639.7 19.55
 -1 6 4 662.33 20.04
 1 6 -4 629.83 19.95
 1 6 -4 607.44 19.71
 1 -6 -4 569.02 19.87
 1 -6 -4 662.85 19.67
 -1 6 3 341.63 10.36
 -1 6 3 328.98 10.28
 1 6 -3 309.61 10.48
 1 6 -3 310.4 10.4
 1 -6 -3 315.39 9.93
 1 -6 -3 338.21 10.4
 -1 -6 3 305.07 10.2
 -1 -6 3 293.83 10.7
 1 6 -2 198.45 6.58
 1 6 -2 190.98 6.68
 -1 -6 2 197.51 6.74
 -1 -6 2 175.38 6.34
 -1 6 1 68.5 2.84
 1 6 -1 87.41 2.98
 1 6 -1 85.52 3.28
 -1 -6 1 83.97 2.95
 -1 -6 1 78.31 3.09
 1 6 0 503.6 15.02
 1 6 0 487.07 14.94
 1 -6 0 472.06 14.49
 1 -6 0 440.78 14.47
 -1 -6 0 407.9 15.11
 -1 -6 0 492.65 14.63
 -1 6 -1 178.61 5.71
 -1 6 -1 182.53 5.77
 1 6 1 181.24 5.87
 1 6 1 177.44 5.78
 1 -6 1 180.3 5.72
 1 -6 1 169.52 5.64
 -1 -6 -1 185.72 5.74
 -1 -6 -1 180.91 5.65
 -1 6 -2 105.32 3.31
 1 6 2 90.95 3.14
 1 6 2 88.18 3.01
 -1 -6 -2 90.89 3.26
 -1 -6 -2 89.28 3.04
 -1 6 -3 118.11 3.93
 -1 6 -3 111.38 4.06
 1 -6 3 116.45 3.98
 1 -6 3 114.83 3.89
 -1 6 -4 209.33 7.11
 -1 6 -4 206.7 6.97
 1 6 4 194.65 6.68
 1 6 4 221.46 6.79
 1 -6 4 207.06 6.82
 1 -6 4 216.09 6.72
 -1 -6 -4 190.21 6.7
 -1 -6 -4 222.21 6.81
 -1 6 -5 4.36 0.37
 -1 6 -5 3.9 0.3
 1 6 5 3.3 0.22
 1 6 5 5.05 0.26
 1 -6 5 4.03 0.3
 1 -6 5 4.07 0.32
 -1 -6 -5 3.52 0.19
 -1 -6 -5 4.47 0.25
 -1 6 -6 356.71 11.28
 -1 6 -6 352.57 11.22
 1 6 6 340.02 10.93
 1 6 6 363.95 11.15
 1 -6 6 347.32 11.15
 1 -6 6 358.42 11.26
 -1 -6 -6 341.21 10.8
 -1 -6 -6 355.07 11.05
 -1 6 -7 49.44 1.65
 -1 6 -7 47.85 1.67
 1 6 7 41.61 1.51
 1 -6 7 46.93 1.74
 1 -6 7 46.4 1.73
 -1 -6 -7 44.16 1.54
 -1 6 -8 109.84 3.44
 -1 6 -8 106.34 3.72
 1 6 8 96.52 3.14
 1 6 8 102.7 3.19
 1 -6 8 104.97 3.52
 1 -6 8 107.45 3.38
 -1 -6 -8 97.11 3.25
 -1 6 -9 49.18 1.85
 -1 6 -9 44.76 1.62
 1 -6 9 44.53 1.6
 1 -6 9 50.53 1.79
 -1 6 -10 829.33 27.12
 -1 6 -10 859.36 26.53
 1 -6 10 798.62 27.03
 1 -6 10 913.21 26.43
 -1 6 -11 1267.88 37.73
 -1 6 -11 1188.47 37.4
 1 -6 11 1152.55 37.57
 1 -6 11 1230.07 37.87
 -1 6 -12 77.94 2.87
 -1 6 -12 72.77 2.88
 1 -6 12 76.24 2.9
 1 -6 12 73.96 2.82
 -1 6 -13 46.34 1.73
 -1 6 -13 33.38 1.73
 1 -6 13 43.2 1.69
 1 -6 13 36.97 1.62
 -1 6 -14 66.51 2.69
 -1 6 -14 65.2 2.7
 1 -6 14 75.63 2.6
 1 -6 14 62.65 2.53
 -1 6 -15 20.1 1
 -1 6 -15 16.14 1.31
 1 -6 15 20.84 0.93
 1 -6 15 19 1.46
 -1 6 -16 5.52 0.65
 1 -6 16 3.68 0.61
 -1 6 -17 96.68 3.39
 1 -6 17 99.22 3.24
 1 -6 17 98.96 3.47
 -1 6 -18 8.16 0.95
 -1 6 -18 8.25 1.08
 1 -6 18 6.68 0.81
 1 -6 18 5.54 1.15
 -1 6 -19 -0.77 0.94
 1 -6 19 -0.23 1.18
 -1 7 19 144.41 4.92
 -1 7 19 131.32 5.3
 1 7 -19 137.69 4.82
 1 -7 -19 148.05 4.56
 1 -7 -19 147.46 6.19
 -1 -7 19 135.18 4.58
 -1 -7 19 128.71 5.34
 1 7 -18 21.74 1.89
 1 -7 -18 17.61 1.14
 -1 -7 18 20.1 1.25
 1 7 -17 2.37 0.56
 1 7 -17 2.5 0.78
 1 -7 -17 2.81 0.62
 -1 -7 17 3.47 0.69
 -1 7 16 13.22 0.81
 1 7 -16 12.31 0.86
 1 7 -16 12.44 0.82
 1 -7 -16 10.47 0.85
 -1 -7 16 14.23 0.89
 -1 -7 16 11.22 0.89
 -1 7 15 5.47 0.42
 -1 7 15 5.49 0.44
 1 7 -15 5.58 0.51
 1 7 -15 4.69 0.55
 1 -7 -15 4.49 0.5
 1 -7 -15 6.28 0.71
 -1 -7 15 5.58 0.55
 -1 -7 15 5.02 0.55
 -1 7 14 439.41 15.23
 -1 7 14 440.46 15.69
 1 7 -14 535.79 16.07
 1 7 -14 532.41 16
 1 -7 -14 444.36 15.55
 1 -7 -14 451.81 15.69
 -1 -7 14 517.59 15.32
 -1 -7 14 521.16 15.92
 -1 7 13 115.78 4
 -1 7 13 127.72 4.16
 1 7 -13 120.76 4.65
 1 7 -13 116.73 4.04
 1 -7 -13 121.98 3.97
 1 -7 -13 125.05 4.37
 -1 -7 13 113.18 3.98
 -1 -7 13 125.92 4.26
 -1 7 12 91.1 3.1
 -1 7 12 100.61 3.26
 1 7 -12 97.47 3.82
 1 7 -12 92.09 3.75
 1 -7 -12 91.14 3.17
 1 -7 -12 95.17 3.22
 -1 -7 12 92.01 3.48
 -1 -7 12 96.44 3.5
 -1 7 11 114.89 4.03
 1 7 -11 97.63 3.72
 1 7 -11 92.8 3.38
 1 -7 -11 94.31 3.57
 -1 -7 11 97.78 3.34
 -1 -7 11 95.29 3.42
 -1 7 10 13.68 0.6
 -1 7 10 15.91 0.77
 1 7 -10 15.38 0.72
 1 7 -10 15.87 0.75
 1 -7 -10 15.06 0.68
 1 -7 -10 13.83 0.71
 -1 -7 10 13.7 0.7
 -1 -7 10 14.92 0.7
 -1 7 9 60.61 2.74
 -1 7 9 56.17 3.37
 1 7 -9 52.54 3.13
 1 -7 -9 51.95 2.98
 1 -7 -9 66.26 2.86
 -1 -7 9 55.44 2.97
 -1 -7 9 51.35 3.25
 -1 7 8 103.76 3.7
 -1 7 8 119.38 3.87
 1 7 -8 103.56 3.7
 1 7 -8 114.84 3.89
 1 -7 -8 117.67 3.81
 1 -7 -8 104.2 3.71
 -1 -7 8 117.16 3.97
 -1 -7 8 105.69 3.86
 -1 7 7 11.3 0.68
 1 7 -7 9.24 0.52
 1 7 -7 10.91 0.6
 1 -7 -7 13.82 1.13
 -1 -7 7 11.09 0.58
 -1 -7 7 9.61 0.5
 -1 7 6 26.09 1.55
 -1 7 6 24.4 1.76
 1 7 -6 23.48 1.58
 1 -7 -6 28.63 1.62
 -1 -7 6 28.54 1.46
 -1 7 5 322 10.35
 -1 7 5 331.53 10.76
 1 7 -5 329.81 10.46
 1 -7 -5 328.24 10.45
 1 -7 -5 320.25 10.29
 -1 7 4 254.72 8.58
 -1 7 4 270.2 8.88
 1 7 -4 272.47 8.73
 1 7 -4 276.87 8.92
 1 -7 -4 249.29 8.5
 1 -7 -4 244.03 8.5
 -1 -7 4 280.36 8.82
 -1 -7 4 277.21 8.97
 -1 7 3 831.96 24.58
 -1 7 3 840.61 24.47
 1 7 -3 840.42 24.6
 1 7 -3 846.05 24.69
 1 -7 -3 689.03 24.76
 1 -7 -3 716.59 25.48
 -1 -7 3 720.75 25.11
 -1 -7 3 755.52 25.38
 -1 7 2 35.53 1.86
 1 7 -2 31.3 1.6
 1 7 -2 33.81 1.48
 1 -7 -2 30.86 1.66
 -1 -7 2 34.71 1.64
 -1 -7 2 36.41 1.48
 -1 7 1 360.79 11.22
 -1 7 1 349.17 11.01
 1 7 -1 312.71 10.79
 1 7 -1 305.7 10.86
 1 -7 -1 346.04 10.88
 1 -7 -1 370.19 11.24
 -1 -7 1 326.09 10.77
 -1 7 0 223.71 7.62
 -1 7 0 271.38 7.95
 1 7 0 234.93 7.73
 1 7 0 247.03 7.59
 -1 -7 0 239.25 7.82
 -1 -7 0 232.57 7.82
 -1 7 -1 80.14 2.84
 1 -7 1 77.16 2.92
 1 -7 1 75.21 2.9
 -1 7 -2 197.95 6.61
 -1 7 -2 191.12 6.33
 1 -7 2 204.23 6.44
 1 -7 2 196.71 6.46
 -1 7 -3 821.57 23.89
 -1 7 -3 817.45 24.13
 1 7 3 821.61 23.98
 1 7 3 734.78 23.61
 1 -7 3 754.33 23.66
 1 -7 3 747.14 24.32
 -1 -7 -3 724.97 23.62
 -1 -7 -3 728.33 23.95
 -1 7 -4 406.72 12.62
 -1 7 -4 417.41 12.75
 1 7 4 371.87 12.43
 1 7 4 376.83 12.07
 1 -7 4 404.74 12.51
 1 -7 4 404.9 12.71
 -1 -7 -4 370.84 12.27
 -1 -7 -4 378.78 12.17
 -1 7 -5 367.64 11.5
 -1 7 -5 360.69 11.27
 1 7 5 338.9 11.06
 1 7 5 351.51 10.84
 1 -7 5 353.23 11.08
 1 -7 5 357.2 11.18
 -1 -7 -5 337.08 10.87
 -1 -7 -5 334.87 10.82
 -1 7 -6 217.6 6.95
 -1 7 -6 216.01 7
 1 7 6 209.24 6.7
 1 7 6 218.65 6.81
 1 -7 6 217.05 6.84
 1 -7 6 207.84 6.88
 -1 -7 -6 205.38 6.6
 -1 -7 -6 214.86 6.86
 -1 7 -7 17.62 0.78
 -1 7 -7 17.11 0.79
 1 7 7 21.46 0.69
 1 -7 7 18.78 0.79
 1 -7 7 17.28 0.72
 -1 -7 -7 20.37 0.71
 -1 -7 -7 19.5 0.8
 -1 7 -8 170.12 5.65
 -1 7 -8 173.15 6
 1 7 8 167.94 5.27
 1 7 8 160.16 5.48
 1 -7 8 190.52 5.91
 1 -7 8 167.57 5.54
 -1 -7 -8 176.12 5.43
 -1 -7 -8 170.48 5.47
 -1 7 -9 527.37 16.59
 -1 7 -9 515.71 16.34
 1 7 9 487.67 15.71
 1 7 9 514.24 16.05
 1 -7 9 528.58 16.4
 1 -7 9 551.83 16.82
 -1 -7 -9 527.9 16.08
 -1 7 -10 10.83 0.61
 -1 7 -10 9.07 0.53
 1 -7 10 9.53 0.51
 1 -7 10 8.04 0.43
 -1 7 -11 148.09 5.41
 -1 7 -11 160.68 5.51
 1 -7 11 163.44 5.4
 1 -7 11 155.16 5.18
 -1 7 -12 4.76 0.81
 -1 7 -12 1.34 0.48
 1 -7 12 1.28 0.55
 -1 7 -13 72.42 2.88
 -1 7 -13 78.23 3.01
 1 -7 13 76.08 2.7
 1 -7 13 77.35 2.81
 -1 7 -14 266.29 8.77
 -1 7 -14 253.24 8.63
 1 -7 14 229.72 8.85
 1 -7 14 269.06 8.82
 -1 7 -15 15.78 0.79
 -1 7 -15 13.97 1.11
 1 -7 15 14.66 0.8
 1 -7 15 15.55 1
 -1 7 -16 60.84 2.09
 -1 7 -16 60.09 2.38
 1 -7 16 59.71 2.27
 1 -7 16 58.69 2.29
 -1 7 -17 45.41 1.71
 1 -7 17 46.14 1.75
 -1 7 -18 6.07 0.94
 1 -7 18 4.61 0.79
 1 -7 18 5.91 1.06
 -1 7 -19 56.55 2.9
 1 -7 19 67.1 3.41
 -1 -8 18 1.91 0.84
 -1 8 17 4.61 0.72
 1 8 -17 4.85 1.03
 1 -8 -17 3.51 0.79
 -1 -8 17 5.57 0.65
 -1 8 16 1.28 0.39
 -1 8 16 1.03 0.37
 1 8 -16 1.39 0.49
 1 8 -16 1.51 0.56
 1 -8 -16 1.2 0.78
 -1 -8 16 1.17 0.46
 -1 -8 16 1.07 0.45
 -1 8 15 54.97 2.05
 -1 8 15 52.32 2.02
 1 8 -15 60.96 2.34
 1 8 -15 56 2.5
 1 -8 -15 59.8 1.99
 -1 -8 15 64.1 2.31
 -1 -8 15 57.22 2.25
 -1 8 14 7.83 0.49
 -1 8 14 8.16 0.56
 1 8 -14 8.7 0.8
 1 8 -14 6.95 0.65
 1 -8 -14 6.93 0.52
 1 -8 -14 8.78 0.67
 -1 -8 14 9.21 0.68
 -1 -8 14 9.52 0.83
 -1 8 13 19.36 0.86
 -1 8 13 19.26 0.89
 1 8 -13 20.3 1.05
 1 8 -13 20.34 1.25
 1 -8 -13 20.97 0.89
 1 -8 -13 20.12 1.04
 -1 -8 13 21.46 0.9
 -1 -8 13 19.59 1.06
 -1 8 12 30.61 1.28
 -1 8 12 27.11 1.12
 1 8 -12 27.98 1.25
 1 8 -12 28.66 1.26
 1 -8 -12 30.16 1.11
 1 -8 -12 24.05 1.27
 -1 -8 12 27.22 1.09
 -1 -8 12 26.37 1.32
 -1 8 11 446.68 13.87
 -1 8 11 443.05 14.65
 1 8 -11 435.16 13.81
 1 8 -11 446.02 14.06
 1 -8 -11 437.1 14.3
 1 -8 -11 444.06 14.74
 -1 -8 11 432.64 13.84
 -1 -8 11 446.12 14.01
 1 8 -10 12.01 1.34
 1 8 -10 15.46 1.32
 1 -8 -10 9.07 1.24
 -1 -8 10 14.19 1.27
 -1 -8 10 13.68 1.25
 -1 8 9 92.55 3.1
 -1 8 9 100.94 3.56
 1 8 -9 94.56 3.18
 1 8 -9 91.04 3.33
 1 -8 -9 99.01 3.26
 1 -8 -9 91.38 3.25
 -1 -8 9 98.12 3.25
 -1 -8 9 90.56 3.41
 -1 8 8 42.36 1.69
 -1 8 8 44.89 1.68
 1 8 -8 43.27 1.57
 1 8 -8 44.79 1.69
 1 -8 -8 44.06 1.53
 1 -8 -8 44.12 1.81
 -1 -8 8 44.05 1.55
 -1 -8 8 41.05 1.6
 -1 8 7 5.23 0.83
 -1 8 7 6.87 0.97
 1 8 -7 9.19 1.09
 1 8 -7 7.52 1
 1 -8 -7 4.58 0.71
 -1 -8 7 6.46 0.97
 -1 8 6 95.87 3.27
 -1 8 6 97.05 3.41
 1 -8 -6 94.31 3.38
 1 -8 -6 102.01 3.34
 -1 -8 6 118.62 4.02
 -1 -8 6 113.67 4.34
 -1 8 5 9.77 0.59
 -1 8 5 8.63 0.55
 1 8 -5 7.9 0.53
 1 8 -5 9.06 0.59
 1 -8 -5 7.98 0.52
 1 -8 -5 8.3 0.41
 -1 8 4 29.12 1.21
 -1 8 4 30.9 1.27
 1 8 -4 26.86 1.26
 1 8 -4 28.88 1.13
 1 -8 -4 29.31 1.15
 1 -8 -4 28.47 1.11
 -1 -8 4 32.06 1.16
 -1 -8 4 32.07 1.26
 -1 8 3 23.6 1.29
 -1 8 3 22.99 1.45
 1 8 -3 18.15 1.31
 1 8 -3 19.27 1.29
 1 -8 -3 24.46 1.33
 -1 -8 3 24.39 1.4
 -1 8 2 66.76 2.45
 -1 8 2 74.25 2.66
 1 8 -2 75.01 2.69
 1 8 -2 73.1 2.46
 1 -8 -2 67.55 2.67
 1 -8 -2 71.34 2.48
 -1 -8 2 75.69 2.59
 -1 -8 2 69.52 2.57
 1 8 -1 206.03 7.49
 1 8 -1 194.98 7.17
 -1 -8 1 210.35 7.57
 -1 -8 1 196.36 7.24
 -1 8 0 95.96 3.33
 -1 8 0 97.87 3.49
 1 8 0 106.01 3.62
 1 8 0 119.2 3.82
 -1 -8 0 108.85 3.69
 -1 -8 0 107.01 3.62
 1 8 1 13.87 0.93
 1 8 1 12.99 0.89
 -1 -8 -1 11.27 0.96
 -1 -8 -1 13.14 0.9
 -1 8 -2 169.15 5.64
 -1 8 -2 167.24 5.65
 1 8 2 176.95 5.7
 1 8 2 169.6 5.47
 1 -8 2 167.3 5.45
 1 -8 2 168.4 5.55
 -1 -8 -2 170.24 5.52
 -1 -8 -2 180.74 5.58
 -1 8 -3 187.76 6.1
 -1 8 -3 186.11 6.17
 1 8 3 195.25 6.27
 1 8 3 190.07 6.14
 1 -8 3 187.46 6.14
 1 -8 3 185.68 6.2
 -1 -8 -3 186.63 6
 -1 -8 -3 190.38 6.19
 -1 8 -4 44.11 1.61
 -1 8 -4 41.35 1.57
 1 8 4 44 1.73
 1 8 4 52.93 1.65
 1 -8 4 46.3 1.7
 1 -8 4 44.38 1.61
 -1 -8 -4 45.81 1.65
 -1 -8 -4 48.82 1.62
 -1 8 -5 6.02 0.47
 -1 8 -5 5.44 0.4
 1 8 5 7.55 0.36
 1 8 5 8.15 0.38
 1 -8 5 5.88 0.36
 1 -8 5 5.96 0.35
 -1 -8 -5 6.61 0.35
 -1 -8 -5 7.95 0.4
 1 8 6 39.86 1.51
 1 8 6 42.28 1.46
 -1 -8 -6 38.79 1.46
 -1 -8 -6 47.11 1.54
 -1 8 -7 169.47 5.78
 -1 8 -7 185.22 6.1
 1 8 7 164.84 5.58
 1 8 7 179.83 5.69
 1 -8 7 179.28 5.8
 1 -8 7 175.24 5.93
 -1 -8 -7 174.95 5.62
 -1 -8 -7 174.59 5.69
 -1 8 -8 34.62 1.3
 -1 8 -8 37.48 1.54
 1 8 8 32.79 1.16
 1 8 8 35.63 1.18
 1 -8 8 37.05 1.45
 1 -8 8 33.8 1.24
 -1 -8 -8 32.92 1.14
 -1 -8 -8 30.62 1.2
 -1 8 -9 61.85 2.03
 -1 8 -9 57.74 2.18
 1 8 9 57.41 1.91
 1 8 9 58.27 1.96
 1 -8 9 61.6 2.01
 1 -8 9 60.89 2.16
 -1 -8 -9 54.28 2.01
 -1 -8 -9 55.27 2.02
 -1 8 -10 186.75 6.27
 -1 8 -10 186.45 6.13
 1 8 10 188.17 5.82
 1 8 10 189.43 5.94
 1 -8 10 190.08 6.22
 1 -8 10 184.19 6.12
 -1 -8 -10 198.99 6.11
 -1 -8 -10 196.72 5.98
 -1 8 -11 361.27 11.65
 -1 8 -11 360.23 11.66
 1 -8 11 361.99 11.54
 1 -8 11 378.13 11.98
 -1 8 -12 54.18 1.96
 -1 8 -12 55.55 2.22
 1 -8 12 52.59 1.92
 1 -8 12 58.92 2.29
 -1 8 -13 14.46 0.79
 -1 8 -13 15.46 0.87
 1 -8 13 15.72 0.79
 1 -8 13 17.02 0.91
 -1 8 -14 3.69 0.5
 -1 8 -14 3.11 0.59
 1 -8 14 3.46 0.47
 1 -8 14 4.59 0.57
 -1 8 -15 9.98 0.89
 -1 8 -15 10.28 0.84
 1 -8 15 8.53 0.75
 1 -8 15 10.28 0.93
 -1 8 -16 1.95 0.62
 1 -8 16 1.87 0.64
 1 -8 16 1.43 0.78
 -1 8 -17 31.53 1.72
 -1 8 -17 27 1.46
 1 -8 17 26.51 1.43
 -1 8 -18 5.62 1.1
 -1 8 -18 3.83 0.81
 1 -8 18 5.59 1.24
 -1 -9 18 1.86 0.77
 1 9 -17 6.32 0.84
 -1 -9 17 7.64 1.06
 1 9 -16 1.03 0.57
 1 9 -16 2.69 0.62
 1 -9 -16 2.39 0.63
 -1 -9 16 2.37 0.66
 -1 9 15 47.22 1.86
 1 9 -15 40.85 2.24
 1 9 -15 44.13 2.1
 1 -9 -15 48.79 2.35
 1 -9 -15 51.64 1.92
 -1 -9 15 48.68 1.73
 -1 -9 15 44.52 1.9
 -1 9 14 58.8 2.11
 -1 9 14 63.59 2.7
 1 9 -14 59.28 2.67
 1 9 -14 59.44 2.16
 1 -9 -14 64.03 2.57
 1 -9 -14 67.93 2.22
 -1 -9 14 61.5 2.1
 -1 -9 14 58.37 2.17
 -1 9 13 6.64 0.53
 -1 9 13 7.15 0.56
 1 9 -13 5.08 0.66
 1 9 -13 4.65 0.64
 1 -9 -13 4.77 0.46
 1 -9 -13 6.41 0.56
 -1 -9 13 6.39 0.53
 -1 -9 13 5.58 0.53
 -1 9 12 30.44 1.65
 -1 9 12 29.33 1.77
 1 9 -12 30.03 1.65
 1 9 -12 30 1.51
 1 -9 -12 35.56 1.96
 1 -9 -12 35.59 1.61
 -1 -9 12 31.07 1.65
 -1 9 11 0.68 0.48
 -1 9 11 1.58 0.34
 1 9 -11 1.29 0.45
 1 9 -11 0.79 0.45
 1 -9 -11 0.8 0.28
 -1 -9 11 1.56 0.39
 -1 -9 11 1.24 0.36
 -1 9 10 0.84 0.36
 -1 9 10 0.57 0.34
 1 9 -10 0.91 0.37
 1 9 -10 0.38 0.44
 1 -9 -10 0.23 0.23
 1 -9 -10 1.26 0.37
 -1 -9 10 1.24 0.35
 -1 -9 10 0.41 0.4
 -1 9 9 208.14 6.74
 -1 9 9 216.14 7.06
 1 9 -9 217.39 7.09
 1 9 -9 216.35 7.14
 1 -9 -9 211.04 6.87
 1 -9 -9 218.48 6.97
 -1 -9 9 221.75 7.15
 -1 -9 9 205.53 7.09
 -1 9 8 127.27 4.37
 -1 9 8 128.58 4.44
 1 9 -8 144.47 4.76
 1 9 -8 131.78 4.73
 1 -9 -8 128.67 4.57
 1 -9 -8 139.9 4.55
 -1 -9 8 142.65 4.57
 -1 -9 8 130.35 4.82
 -1 9 7 12.22 0.66
 1 9 -7 12.54 0.95
 1 9 -7 11.9 0.99
 1 -9 -7 10.42 0.56
 1 -9 -7 10.44 0.65
 -1 -9 7 12.9 0.89
 -1 -9 7 11.45 1.06
 -1 9 6 82.01 2.91
 -1 9 6 83.54 2.87
 1 -9 -6 81.26 2.82
 1 -9 -6 79.63 2.74
 -1 -9 6 79.7 3
 -1 -9 6 88.76 3.14
 -1 9 5 19.69 1.13
 -1 9 5 22.19 1.17
 1 9 -5 21.5 1.26
 1 9 -5 21.27 1.15
 1 -9 -5 21.79 1.21
 1 -9 -5 16.64 1.07
 -1 -9 5 21.76 1.24
 -1 9 4 92.42 3.2
 -1 9 4 93.19 3.23
 1 9 -4 93.16 3.49
 1 9 -4 89.84 3.37
 1 -9 -4 93.27 3.08
 1 -9 -4 93.36 3.3
 -1 -9 4 97.47 3.35
 -1 -9 4 90.96 3.52
 -1 9 3 1.68 0.41
 -1 9 3 0.99 0.44
 1 9 -3 3.68 0.86
 1 9 -3 3.24 0.67
 1 -9 -3 0.48 0.34
 1 -9 -3 2.32 0.4
 -1 -9 3 4.19 0.8
 -1 -9 3 1.46 0.51
 -1 9 2 177.56 6.14
 -1 9 2 174.03 6.09
 1 9 -2 186.09 6.69
 1 9 -2 196.9 6.51
 1 -9 -2 153.76 5.73
 1 -9 -2 185.02 6.17
 -1 -9 2 181.24 6.56
 -1 -9 2 172.75 6.59
 -1 9 1 142.66 4.94
 -1 9 1 150.7 5.09
 1 9 -1 149.63 5.05
 1 9 -1 167.42 5.24
 1 -9 -1 144.02 5.12
 1 -9 -1 149.16 4.96
 -1 -9 1 157.63 5.02
 -1 -9 1 151.31 5.22
 -1 9 0 83.16 2.98
 -1 9 0 92.44 3.37
 1 9 0 89.57 3.26
 1 9 0 92.36 3.04
 1 -9 0 103.6 3.29
 1 -9 0 86.14 2.99
 -1 -9 0 98.84 3.3
 -1 -9 0 95.63 3.26
 1 9 1 14.33 1.02
 1 9 1 11.86 0.88
 -1 -9 -1 15.58 1.03
 -1 9 -2 26.71 1.5
 -1 9 -2 26.31 1.3
 1 9 2 24.93 1.14
 1 9 2 26.91 1.28
 1 -9 2 26.6 1.43
 -1 -9 -2 24.07 1.28
 -1 -9 -2 21.12 1.23
 -1 9 -3 38.15 1.6
 -1 9 -3 37.43 1.5
 1 9 3 40.45 1.42
 1 9 3 37.58 1.36
 1 -9 3 37.99 1.57
 1 -9 3 40.79 1.66
 -1 -9 -3 38.47 1.46
 -1 -9 -3 37.34 1.35
 -1 9 -4 13.87 0.84
 -1 9 -4 14.09 0.78
 1 9 4 14.49 0.88
 1 9 4 17.95 0.83
 1 -9 4 14.15 0.89
 1 -9 4 14.23 0.87
 -1 -9 -4 14.3 0.77
 -1 -9 -4 15.94 0.82
 -1 9 -5 142.05 4.95
 -1 9 -5 145.46 4.68
 1 9 5 138.61 4.53
 1 9 5 143.44 4.7
 1 -9 5 145.14 4.55
 1 -9 5 148.28 5
 -1 -9 -5 143.83 4.58
 -1 -9 -5 137.61 4.65
 -1 9 -6 15.63 0.97
 -1 9 -6 14.47 0.84
 1 9 6 13.59 0.69
 1 9 6 16.32 0.75
 1 -9 6 14.13 0.99
 1 -9 6 16.03 0.9
 -1 -9 -6 12.35 0.69
 -1 -9 -6 16.09 0.74
 -1 9 -7 44.85 1.67
 -1 9 -7 43.92 1.73
 1 9 7 41.81 1.57
 1 9 7 43.21 1.53
 1 -9 7 45.61 1.6
 1 -9 7 43.96 1.62
 -1 -9 -7 40.89 1.51
 -1 -9 -7 41.74 1.52
 1 9 8 139.81 4.52
 1 9 8 147.59 4.51
 -1 -9 -8 143.12 4.51
 -1 -9 -8 131.03 4.51
 -1 9 -9 76.74 2.8
 -1 9 -9 73.89 2.82
 1 9 9 74.12 2.55
 1 9 9 78.52 2.67
 1 -9 9 75.37 2.76
 1 -9 9 81.91 3.01
 -1 -9 -9 75.88 2.63
 -1 -9 -9 76.51 2.62
 -1 9 -10 20.41 0.85
 -1 9 -10 17.61 0.83
 1 9 10 19.3 0.67
 1 9 10 21.09 0.71
 1 -9 10 20.24 0.82
 1 -9 10 19.39 0.83
 -1 -9 -10 18.13 0.82
 -1 -9 -10 18.82 0.74
 -1 9 -11 -0.38 0.35
 -1 9 -11 0.38 0.39
 1 9 11 0.18 0.13
 1 -9 11 0.32 0.31
 1 -9 11 0.25 0.3
 -1 -9 -11 0.21 0.15
 -1 -9 -11 0.07 0.19
 -1 9 -12 148.96 4.96
 -1 9 -12 146.57 5.06
 1 -9 12 153.04 4.99
 1 -9 12 147.86 5.19
 -1 9 -13 8.4 0.63
 -1 9 -13 6.45 0.52
 1 -9 13 7.94 0.63
 1 -9 13 8.74 0.77
 -1 9 -14 1.21 0.69
 -1 9 -14 2.14 0.75
 1 -9 14 1.16 0.62
 1 -9 14 1.08 0.5
 -1 9 -15 64.55 2.45
 -1 9 -15 62.25 2.89
 1 -9 15 63.56 2.45
 1 -9 15 70.14 2.98
 -1 9 -16 6.17 0.86
 -1 9 -16 4.79 0.8
 1 -9 16 5.58 0.78
 1 -9 16 5.63 1.12
 -1 9 -17 58.72 2.54
 -1 9 -17 41.12 2.86
 1 -9 17 56.6 2.08
 1 -9 17 47.92 2.76
 -1 9 -18 41.15 2.09
 1 -9 18 39.83 2.66
 -1 -10 18 3 0.47
 -1 -10 17 10.07 0.78
 -1 10 16 1.68 0.61
 1 10 -16 0.37 0.6
 1 10 -16 0.06 0.43
 1 -10 -16 0.7 0.66
 -1 -10 16 -0.14 0.66
 -1 10 15 -0.05 0.45
 -1 10 15 -0.25 0.39
 1 10 -15 -1.38 0.62
 1 10 -15 -0.42 0.52
 1 -10 -15 0.08 0.53
 -1 -10 15 -0.74 0.44
 -1 -10 15 -1.43 0.69
 -1 10 14 35.05 1.28
 -1 10 14 28.94 1.51
 1 10 -14 34.86 1.31
 1 10 -14 29.6 1.36
 1 -10 -14 34.53 1.33
 -1 -10 14 26.59 1.46
 -1 -10 14 24.76 1.55
 -1 10 13 15.61 0.74
 1 10 -13 14.34 0.91
 1 10 -13 15.31 0.86
 1 -10 -13 14.16 0.73
 -1 -10 13 13.71 0.74
 -1 -10 13 13.36 0.77
 -1 10 12 34.22 1.32
 -1 10 12 34.47 1.34
 1 10 -12 34.83 1.39
 1 10 -12 26.81 1.67
 1 -10 -12 30.72 1.33
 1 -10 -12 33.55 1.53
 -1 -10 12 35.76 1.23
 -1 10 11 1.62 0.48
 -1 10 11 -0.22 0.35
 1 10 -11 0.22 0.42
 1 10 -11 0.37 0.43
 1 -10 -11 0.3 0.26
 1 -10 -11 0.79 0.38
 -1 -10 11 0.25 0.34
 -1 -10 11 0.29 0.39
 -1 10 10 1.33 0.29
 -1 10 10 1.34 0.36
 1 10 -10 1.57 0.46
 1 10 -10 1.12 0.42
 1 -10 -10 1.45 0.3
 1 -10 -10 1.18 0.31
 -1 -10 10 1.34 0.39
 -1 -10 10 0.93 0.25
 -1 10 9 17.55 0.9
 -1 10 9 17.09 0.89
 1 10 -9 16.17 1.4
 1 10 -9 19.41 1.49
 1 -10 -9 16.31 0.75
 1 -10 -9 19.39 0.93
 -1 -10 9 16.04 1.3
 -1 -10 9 17.56 1.42
 -1 10 8 99.28 3.35
 -1 10 8 95.21 3.64
 1 10 -8 97.23 3.32
 1 10 -8 107.7 4.12
 1 -10 -8 93.73 3.1
 1 -10 -8 96.02 3.27
 -1 -10 8 99.42 3.24
 -1 -10 8 102.39 4.14
 -1 10 7 372.56 11.91
 -1 10 7 392.22 12.12
 1 10 -7 379.76 12.61
 1 -10 -7 377.57 12.14
 1 -10 -7 404.32 12.14
 -1 -10 7 375.99 12.35
 -1 -10 7 382.48 12.55
 1 10 -6 7.8 1.2
 1 10 -6 7.34 0.83
 1 -10 -6 6.12 1.05
 -1 10 5 26.08 1.15
 -1 10 5 29.8 1.3
 1 -10 -5 28.84 1.18
 1 -10 -5 28.15 1.13
 -1 10 4 18.35 0.99
 -1 10 4 15.67 0.99
 1 10 -4 19.31 1.27
 1 10 -4 17.31 1.02
 1 -10 -4 14.14 0.88
 1 -10 -4 16.63 0.97
 -1 -10 4 21.6 1.09
 -1 -10 4 16.26 0.93
 -1 10 3 20.21 0.95
 -1 10 3 20 1.02
 1 10 -3 16.56 0.88
 1 10 -3 20.11 0.87
 1 -10 -3 17.78 0.95
 1 -10 -3 19.91 0.89
 -1 -10 3 17.26 0.88
 -1 -10 3 19.03 0.85
 -1 10 2 22.14 1.01
 -1 10 2 24.77 0.99
 1 10 -2 21.55 0.96
 1 10 -2 23.94 1.02
 1 -10 -2 24.72 1.08
 1 -10 -2 25.95 0.97
 -1 -10 2 22.25 0.92
 -1 -10 2 24.21 0.94
 -1 10 1 10.89 0.79
 -1 10 1 14.08 0.99
 1 10 -1 15.81 1
 1 10 -1 15.59 0.99
 1 -10 -1 12.97 1.11
 1 -10 -1 10.34 0.95
 -1 -10 1 16.97 1
 -1 -10 1 13.57 0.83
 -1 10 0 10.38 1.09
 -1 10 0 8.5 0.86
 1 10 0 8.44 1.11
 1 10 0 7.15 0.96
 1 -10 0 8.16 0.81
 1 -10 0 14.42 1.4
 -1 -10 0 7.03 0.78
 -1 -10 0 7.76 1
 -1 10 -1 112.69 4.34
 -1 10 -1 121.53 4.15
 1 10 1 113.46 3.85
 1 10 1 115.23 4.1
 -1 -10 -1 118.32 3.93
 -1 -10 -1 117.32 3.86
 -1 10 -2 9.37 0.56
 1 10 2 8.73 0.52
 1 10 2 9.97 0.48
 1 -10 2 8.75 0.47
 1 -10 2 10.51 0.53
 -1 -10 -2 9.19 0.5
 -1 -10 -2 9.42 0.53
 -1 10 -3 65.23 2.29
 -1 10 -3 67.77 2.41
 1 10 3 66.85 2.35
 1 10 3 67.67 2.31
 1 -10 3 68.58 2.5
 1 -10 3 68.97 2.35
 -1 -10 -3 72.83 2.36
 -1 -10 -3 64.68 2.36
 -1 10 -4 94.16 3.2
 -1 10 -4 96.45 3.35
 1 10 4 101.34 3.77
 1 10 4 99.59 3.26
 1 -10 4 97.05 3.22
 1 -10 4 93.81 3.18
 -1 -10 -4 96.37 3.31
 -1 -10 -4 94.76 3.26
 1 10 5 39.06 1.48
 1 10 5 43.86 1.55
 -1 -10 -5 41.54 1.48
 -1 -10 -5 42.43 1.57
 -1 10 -6 168.56 5.91
 -1 10 -6 166.09 5.87
 1 10 6 170.61 5.59
 1 10 6 173.12 5.47
 1 -10 6 162.5 5.68
 1 -10 6 170.31 5.84
 -1 -10 -6 175.41 5.41
 -1 10 -7 171.3 6.34
 -1 10 -7 179.05 6.1
 1 10 7 174.92 5.82
 1 10 7 175.14 5.65
 1 -10 7 172.43 5.83
 1 -10 7 175.59 6.17
 -1 -10 -7 183.34 5.78
 -1 10 -8 14.4 1.04
 1 10 8 13.24 0.67
 1 10 8 16.8 0.79
 1 -10 8 15.26 0.95
 -1 -10 -8 12.81 0.72
 -1 10 -9 2.66 0.43
 -1 10 -9 3.42 0.46
 1 10 9 3.16 0.28
 1 10 9 3.22 0.32
 1 -10 9 2.42 0.4
 1 -10 9 3.07 0.39
 -1 -10 -9 2.19 0.23
 -1 -10 -9 3.6 0.3
 -1 10 -10 11.46 0.63
 -1 10 -10 9.32 0.6
 1 10 10 10.61 0.46
 1 10 10 11.14 0.49
 1 -10 10 11.32 0.64
 1 -10 10 11.28 0.57
 -1 -10 -10 9.03 0.45
 -1 -10 -10 11.72 0.51
 -1 10 -11 0 0.38
 -1 10 -11 0.09 0.38
 1 10 11 1.13 0.22
 1 -10 11 0.55 0.35
 1 -10 11 0.2 0.3
 -1 -10 -11 1.38 0.22
 -1 -10 -11 1.55 0.27
 -1 10 -12 17.82 0.9
 -1 10 -12 15.82 0.97
 1 -10 12 16.54 0.86
 1 -10 12 17.49 0.87
 -1 10 -13 9.94 0.65
 -1 10 -13 7.11 0.56
 1 -10 13 10.97 0.7
 -1 10 -14 20.48 1.08
 -1 10 -14 23.29 1.3
 1 -10 14 23.14 1.14
 1 -10 14 25.32 1.24
 -1 10 -15 11.74 1.67
 -1 10 -15 10.46 1.49
 1 -10 15 11.94 1.49
 -1 10 -16 1.76 0.91
 -1 10 -16 0.7 0.62
 1 -10 16 2.48 0.92
 -1 10 -17 21.88 1.64
 1 -10 17 23.01 1.53
 1 -10 17 20.24 2.41
 -1 11 16 27.89 1.58
 1 11 -16 29.16 1.69
 -1 -11 16 31.75 1.18
 -1 -11 16 29.21 1.56
 -1 11 15 0.74 0.32
 1 11 -15 1.4 0.64
 1 11 -15 1.55 0.58
 1 -11 -15 1.53 0.44
 1 -11 -15 1.09 0.41
 -1 -11 15 1.46 0.43
 -1 -11 15 0.92 0.55
 -1 11 14 71.07 2.56
 1 11 -14 61.86 2.26
 1 11 -14 61.67 2.63
 1 -11 -14 67.22 2.5
 1 -11 -14 62.67 2.66
 -1 -11 14 59.03 2.15
 -1 -11 14 62.98 2.39
 -1 11 13 2.84 0.4
 -1 11 13 3.55 0.44
 1 11 -13 3.81 0.59
 1 11 -13 2.61 0.5
 1 -11 -13 3.54 0.42
 -1 -11 13 3.47 0.52
 -1 11 12 29.41 1.34
 -1 11 12 29.6 1.44
 1 11 -12 28.95 1.29
 1 11 -12 24.08 1.35
 1 -11 -12 30.37 1.17
 -1 -11 12 29.92 1.11
 -1 11 11 14.95 0.81
 -1 11 11 14.89 0.69
 1 11 -11 15.33 0.77
 1 11 -11 15.41 0.78
 1 -11 -11 13.6 0.63
 1 -11 -11 14.84 0.73
 -1 -11 11 12.75 0.82
 -1 -11 11 14.3 0.69
 -1 11 10 64.8 2.24
 -1 11 10 66.24 2.55
 1 11 -10 70.38 2.47
 1 11 -10 68.22 2.66
 1 -11 -10 65.3 2.5
 1 -11 -10 69.5 2.32
 -1 -11 10 67.17 2.25
 -1 -11 10 62.8 2.36
 -1 11 9 45.24 1.7
 -1 11 9 49.23 1.58
 1 11 -9 50.28 2.1
 1 11 -9 47.72 2.24
 1 -11 -9 44.64 1.81
 1 -11 -9 50.03 1.77
 -1 -11 9 48.53 1.88
 -1 -11 9 43.55 2.3
 -1 11 8 8.78 0.96
 -1 11 8 5.91 0.9
 1 11 -8 7.58 1.31
 1 11 -8 7.55 1.27
 1 -11 -8 4.14 0.86
 1 -11 -8 4.55 0.68
 -1 -11 8 10.58 1.06
 -1 -11 8 7.26 1.1
 -1 11 7 77.67 2.7
 -1 11 7 77.11 2.69
 1 -11 -7 77.65 2.79
 1 -11 -7 84.78 2.78
 -1 -11 7 84.01 2.85
 -1 -11 7 78.47 3.13
 -1 11 6 73.32 2.67
 -1 11 6 78.09 2.87
 1 11 -6 79.96 3.24
 1 11 -6 79.36 3.03
 1 -11 -6 72.7 2.58
 1 -11 -6 73.17 2.57
 -1 11 5 7.8 1.18
 -1 11 5 10.86 1.3
 1 11 -5 4.26 1.17
 1 11 -5 10.65 1.31
 1 -11 -5 2.76 0.83
 1 -11 -5 4.07 0.96
 -1 -11 5 6.08 1.14
 1 11 -4 7.22 0.94
 1 11 -4 12.28 1.01
 -1 -11 4 8.58 0.85
 -1 -11 4 11.47 0.99
 -1 11 3 31.16 2.11
 -1 11 3 37.89 1.95
 1 11 -3 39.97 2.14
 1 11 -3 35.43 2.07
 1 -11 -3 36.95 2.19
 1 -11 -3 39.35 2.14
 -1 -11 3 42.25 1.96
 -1 -11 3 32.79 2.09
 -1 11 2 220.67 7.73
 -1 11 2 222.94 7.71
 1 11 -2 253.59 8.22
 1 11 -2 249.54 8.13
 1 -11 -2 235.74 7.9
 1 -11 -2 225.59 7.69
 -1 -11 2 249.07 7.93
 -1 -11 2 228.95 8.03
 -1 11 1 22.93 1.27
 -1 11 1 26.56 1.25
 1 11 -1 28.02 1.39
 1 11 -1 29.51 1.26
 1 -11 -1 24.89 1.26
 1 -11 -1 22.96 1.24
 -1 -11 1 31.74 1.4
 -1 -11 1 29.06 1.27
 -1 11 0 189.15 6.42
 -1 11 0 189.25 6.33
 1 11 0 187.96 6.37
 1 11 0 189.48 6.25
 1 -11 0 177.81 6.19
 1 -11 0 182.37 6.25
 -1 -11 0 186.58 5.92
 -1 -11 0 186.33 6.02
 -1 11 -1 116.87 4.19
 -1 11 -1 111.16 3.73
 1 11 1 110.42 3.75
 1 11 1 114.17 3.7
 1 -11 1 119.33 4.18
 -1 -11 -1 113.27 3.87
 -1 -11 -1 114.48 4.06
 1 11 2 189.41 6.2
 1 11 2 191.86 6.02
 1 -11 2 186.89 6.39
 1 -11 2 187.65 6.46
 -1 -11 -2 185.92 6.15
 -1 -11 -2 185.46 5.99
 -1 11 -3 353.47 11.64
 -1 11 -3 341.47 11.07
 1 11 3 346.06 11.1
 1 11 3 345.54 11.02
 1 -11 3 344.49 11.24
 1 -11 3 349.89 11.45
 -1 -11 -3 356.86 11.51
 -1 -11 -3 350.51 11.2
 -1 11 -4 134.1 5
 -1 11 -4 130.03 4.72
 1 11 4 153.56 5.05
 1 11 4 152.36 4.73
 1 -11 4 137.94 4.89
 1 -11 4 140.12 4.89
 -1 -11 -4 146.2 4.8
 -1 -11 -4 146.63 4.75
 -1 11 -5 241.55 7.85
 -1 11 -5 245.68 8.22
 1 11 5 244.96 7.85
 1 11 5 243.88 7.76
 1 -11 5 250.55 7.9
 1 -11 5 230.92 7.78
 -1 -11 -5 250.94 7.88
 -1 -11 -5 237.39 7.94
 1 11 6 10.38 0.62
 1 11 6 12.64 0.71
 1 -11 6 9.77 0.8
 1 -11 6 11.96 1.7
 -1 -11 -6 7.57 0.59
 1 11 7 8.44 0.58
 1 11 7 7.79 0.68
 -1 -11 -7 10.05 0.65
 -1 11 -8 155.62 5.34
 -1 11 -8 153.07 5.2
 1 11 8 155.36 5
 1 11 8 145.58 5.14
 1 -11 8 158.24 5.52
 1 -11 8 156.21 5.31
 -1 -11 -8 157.42 5.08
 -1 11 -9 9.23 0.73
 -1 11 -9 10.16 0.77
 1 11 9 9.63 0.59
 1 -11 9 8.96 0.71
 1 -11 9 9.78 0.65
 -1 -11 -9 9.23 0.57
 -1 -11 -9 11.96 0.66
 -1 11 -10 1.16 0.6
 -1 11 -10 0.24 0.42
 1 11 10 1.23 0.32
 1 11 10 1.24 0.49
 1 -11 10 0.99 0.5
 1 -11 10 0.72 0.46
 -1 -11 -10 0.58 0.3
 -1 -11 -10 2.12 0.48
 -1 11 -11 2.72 0.45
 1 11 11 1.76 0.22
 1 11 11 1.96 0.31
 1 -11 11 1.54 0.47
 1 -11 11 2.67 0.42
 -1 -11 -11 1 0.25
 -1 -11 -11 2.38 0.38
 -1 11 -12 1.09 0.66
 -1 11 -12 0.44 0.38
 1 11 12 0.57 0.2
 1 11 12 0.26 0.24
 1 -11 12 0.28 0.6
 1 -11 12 0.36 0.43
 -1 -11 -12 0.16 0.25
 -1 -11 -12 0.22 0.36
 -1 11 -13 0.1 0.48
 -1 11 -13 0.38 0.51
 1 -11 13 -0.16 0.64
 -1 11 -14 35.97 1.61
 -1 11 -14 36.19 1.73
 1 -11 14 37.89 1.64
 1 -11 14 38.2 1.64
 -1 11 -15 0.99 0.88
 -1 11 -15 0.36 0.89
 1 -11 15 1.27 0.72
 -1 11 -16 39.7 2.27
 1 -11 16 39.75 1.69
 -1 11 -17 124.94 4.27
 1 -11 17 117.6 4.38
 1 -11 17 129.46 4.7
 -1 12 15 23.85 1.18
 1 12 -15 23.29 1.21
 1 12 -15 18.81 1.24
 -1 -12 15 19.48 1.29
 1 12 -14 13.26 1.22
 1 12 -14 13.62 1.22
 -1 -12 14 12.81 1.06
 -1 -12 14 15.01 1.15
 -1 12 13 0.5 0.37
 1 12 -13 0.1 0.55
 1 12 -13 0.37 0.53
 -1 -12 13 -0.04 0.36
 -1 12 12 1.06 0.4
 1 12 -12 0.01 0.52
 1 12 -12 0.19 0.52
 1 -12 -12 0.89 0.44
 -1 -12 12 0.44 0.46
 -1 12 11 4.31 0.49
 -1 12 11 4.72 0.52
 1 12 -11 4.68 0.68
 1 12 -11 4.91 0.71
 1 -12 -11 3.87 0.41
 1 -12 -11 4.69 0.52
 -1 -12 11 4.89 0.6
 -1 -12 11 4.78 0.59
 -1 12 10 54.75 1.87
 -1 12 10 53.56 2.08
 1 12 -10 55.38 2.08
 1 12 -10 51.14 2.18
 1 -12 -10 52.53 1.8
 1 -12 -10 55.34 2.02
 -1 -12 10 56.16 1.98
 -1 -12 10 49.67 2.03
 -1 12 9 35.63 1.58
 -1 12 9 40.11 1.45
 1 -12 -9 38.19 1.57
 1 -12 -9 39.14 1.47
 -1 12 8 389.99 12.53
 -1 12 8 381.12 12.36
 1 12 -8 394.92 13.27
 1 12 -8 389.02 12.7
 1 -12 -8 382.47 12.54
 1 -12 -8 403.69 12.1
 -1 -12 8 388.84 12.93
 -1 -12 8 385.78 12.81
 -1 12 7 635.01 20.04
 -1 12 7 639.73 19.75
 1 -12 -7 620.41 20.02
 1 -12 -7 629.53 19.59
 -1 -12 7 606.86 19.79
 -1 12 6 34.78 1.5
 -1 12 6 36.33 1.4
 1 12 -6 33.11 1.48
 1 12 -6 33.42 1.5
 1 -12 -6 35.92 1.48
 1 -12 -6 32.03 1.42
 -1 -12 6 34.09 1.47
 -1 -12 6 35.68 1.48
 -1 12 5 24.1 1.61
 -1 12 5 24.9 1.42
 1 12 -5 25.47 1.48
 1 12 -5 23.03 1.58
 1 -12 -5 29.47 1.52
 1 -12 -5 26.1 1.54
 -1 -12 5 28.78 1.33
 -1 -12 5 22.86 1.5
 -1 12 4 39.78 1.73
 -1 12 4 35.3 1.56
 1 12 -4 39.02 1.59
 1 12 -4 41.61 1.72
 1 -12 -4 43.71 1.71
 1 -12 -4 39.95 1.58
 -1 -12 4 38.03 1.48
 -1 -12 4 40.27 1.79
 -1 12 3 331.58 10.84
 -1 12 3 348.83 11.46
 1 12 -3 352.68 11.62
 1 12 -3 342.79 11.1
 1 -12 -3 340.52 11.28
 1 -12 -3 337.59 11.19
 -1 -12 3 365.7 11.32
 -1 -12 3 335.58 11.15
 1 12 -2 16.3 0.89
 1 12 -2 16.15 0.75
 -1 -12 2 17.39 0.72
 -1 -12 2 15.8 0.72
 -1 12 1 64.97 2.59
 -1 12 1 66.35 2.53
 1 12 -1 61.09 2.19
 1 12 -1 63.03 2.19
 1 -12 -1 64.44 2.42
 1 -12 -1 68.38 2.68
 -1 -12 1 65.28 2.36
 -1 -12 1 62.75 2.33
 -1 12 0 515.81 16.29
 -1 12 0 497.42 15.48
 1 12 0 511.28 16.26
 1 12 0 490.78 15.48
 1 -12 0 467.91 15.32
 1 -12 0 499.33 16
 -1 -12 0 500.49 15.59
 -1 -12 0 506.92 15.56
 -1 12 -1 5.52 0.67
 -1 12 -1 5.66 0.58
 1 12 1 4.8 0.77
 1 12 1 5.46 0.78
 1 -12 1 4.35 0.62
 -1 -12 -1 2.79 0.61
 -1 -12 -1 3.17 0.57
 1 12 2 42.17 2
 1 12 2 40.72 1.93
 -1 -12 -2 46.57 2.19
 -1 -12 -2 40.77 2.04
 -1 12 -3 72.26 3
 -1 12 -3 74.05 3.06
 1 12 3 86.32 3.44
 1 12 3 77.68 2.86
 1 -12 3 70.47 3.18
 1 -12 3 72.51 2.9
 -1 -12 -3 75.21 3.05
 -1 -12 -3 77.98 3.07
 -1 12 -4 1.44 0.48
 -1 12 -4 2.24 0.41
 1 12 4 2.88 0.39
 1 12 4 2.52 0.39
 1 -12 4 0.78 0.35
 1 -12 4 1.45 0.45
 -1 -12 -4 0.7 0.26
 -1 -12 -4 1.92 0.42
 -1 12 -5 202.64 7.13
 -1 12 -5 211.07 7.33
 1 12 5 207.24 7.02
 1 12 5 203.64 7.04
 1 -12 5 207.01 6.9
 1 -12 5 202.05 6.79
 -1 -12 -5 215.98 6.74
 -1 -12 -5 202.28 6.84
 -1 12 -6 58.02 2.24
 -1 12 -6 53.99 2.03
 1 12 6 54.08 2.08
 1 12 6 55.16 1.82
 1 -12 6 54.05 1.95
 1 -12 6 58.73 2.14
 -1 -12 -6 49.35 1.89
 -1 -12 -6 53.74 1.85
 -1 12 -7 101.25 4.69
 -1 12 -7 100.8 4.74
 1 12 7 111.91 3.74
 1 12 7 122.6 4.4
 1 -12 7 99.62 4.51
 1 -12 7 98.99 4.55
 -1 -12 -7 125.97 4.09
 -1 -12 -7 120.91 4.4
 -1 12 -8 58.15 3.01
 -1 12 -8 55.57 2.62
 1 12 8 51.15 2.32
 1 12 8 48.11 2.44
 1 -12 8 55.41 2.88
 1 -12 8 54.61 2.76
 -1 -12 -8 51.94 2.44
 -1 -12 -8 45.71 2.4
 -1 12 -9 71.91 2.89
 -1 12 -9 77.28 2.92
 1 12 9 62.36 2.31
 1 12 9 62.43 2.17
 1 -12 9 71.63 2.82
 -1 -12 -9 58.61 2.3
 -1 -12 -9 57.66 2.33
 -1 12 -10 1.4 0.64
 -1 12 -10 0.39 0.31
 1 12 10 2.22 0.52
 1 -12 10 1.05 0.58
 1 -12 10 0.72 0.42
 -1 -12 -10 1.35 0.5
 -1 12 -11 37.1 1.46
 1 12 11 32.96 1.23
 1 -12 11 36.1 1.85
 1 -12 11 35.07 1.35
 -1 -12 -11 37.62 1.31
 -1 12 -12 10.73 0.85
 -1 12 -12 10.32 1.03
 1 -12 12 9.62 0.88
 -1 -12 -12 10.56 0.92
 -1 12 -13 7.85 0.74
 -1 12 -13 4.46 0.69
 1 -12 13 5.87 0.81
 -1 12 -14 76.9 2.89
 -1 12 -14 79.96 3.33
 1 -12 14 81.85 2.78
 1 -12 14 80.62 2.91
 -1 12 -15 40.34 1.75
 -1 12 -15 38 1.75
 1 -12 15 39.65 1.68
 -1 12 -16 15.52 1.45
 1 -12 16 19.27 1.47
 -1 13 15 10.23 0.93
 1 13 -15 6.1 0.82
 -1 13 14 3.46 0.63
 1 13 -14 3.94 0.74
 1 13 -14 4.7 1
 1 -13 -14 3.57 0.59
 -1 -13 14 6.35 1.09
 -1 13 13 8.43 0.65
 -1 13 13 8.95 0.62
 1 13 -13 7.3 0.86
 1 13 -13 7.52 0.72
 1 -13 -13 7.29 0.56
 1 -13 -13 8.88 0.72
 -1 -13 13 8.27 0.74
 -1 13 12 68 2.53
 -1 13 12 64.89 2.25
 1 13 -12 66.42 2.21
 1 13 -12 71.22 2.29
 1 -13 -12 56.65 2.31
 1 -13 -12 66.6 2.29
 -1 -13 12 66.31 2.24
 -1 -13 12 67.45 2.5
 -1 13 11 5.37 0.65
 -1 13 11 6.23 0.58
 1 13 -11 5.95 0.73
 1 13 -11 5.08 0.52
 1 -13 -11 4.1 0.46
 1 -13 -11 5.43 0.5
 -1 -13 11 5.86 0.53
 -1 -13 11 4.8 0.47
 -1 13 10 39.64 1.61
 -1 13 10 36.74 1.47
 1 13 -10 37 1.37
 1 13 -10 31.01 1.49
 1 -13 -10 33.26 1.29
 1 -13 -10 37.7 1.48
 -1 -13 10 33.86 1.28
 -1 13 9 9.21 0.63
 1 13 -9 9.75 0.67
 1 13 -9 8.63 0.84
 1 -13 -9 8.72 0.59
 1 -13 -9 6.89 0.53
 -1 -13 9 8.77 0.59
 -1 -13 9 8.28 0.77
 -1 13 8 7.3 0.74
 -1 13 8 6.97 0.71
 1 13 -8 8.49 0.94
 1 -13 -8 7.36 0.59
 -1 -13 8 7.16 0.73
 -1 -13 8 5.23 0.59
 -1 13 7 0.64 0.43
 -1 13 7 1.22 0.43
 1 13 -7 0.83 0.61
 1 13 -7 1.12 0.5
 1 -13 -7 1.14 0.4
 1 -13 -7 0.46 0.29
 -1 13 6 48.78 2
 -1 13 6 46.18 1.88
 1 13 -6 45.91 1.86
 1 13 -6 45.97 1.85
 1 -13 -6 44.87 1.85
 1 -13 -6 48.46 1.66
 -1 -13 6 46.53 1.83
 -1 -13 6 49 1.98
 -1 13 5 95.53 4.39
 -1 13 5 108.82 4.14
 1 -13 -5 110.4 4.16
 1 -13 -5 121.57 4.85
 -1 13 4 86.41 3.03
 -1 13 4 95.82 3.47
 1 13 -4 90.21 3.11
 1 13 -4 87.72 3.27
 1 -13 -4 89.15 3.09
 1 -13 -4 87.89 3.04
 -1 -13 4 90.83 3.1
 -1 -13 4 91.27 2.98
 -1 13 3 6.78 0.53
 -1 13 3 6.63 0.51
 1 13 -3 7.12 0.55
 1 13 -3 6.69 0.49
 1 -13 -3 7.4 0.45
 1 -13 -3 7.12 0.47
 -1 -13 3 7.67 0.43
 -1 -13 3 5.82 0.51
 -1 13 2 91.96 3.33
 -1 13 2 91.63 3.07
 1 13 -2 91.98 3.33
 1 13 -2 88.72 3.16
 1 -13 -2 89.33 3.07
 1 -13 -2 91.79 3.27
 -1 -13 2 89.67 2.96
 -1 -13 2 90.68 3.18
 -1 13 1 637.18 20.48
 -1 13 1 631.13 19.99
 1 13 -1 648.71 20.56
 1 13 -1 644.16 19.84
 1 -13 -1 621.36 19.76
 1 -13 -1 638.17 20.41
 -1 -13 1 651.16 20.19
 -1 -13 1 615.42 19.9
 1 13 0 80.79 2.82
 1 13 0 80.33 2.69
 -1 -13 0 78.57 2.7
 -1 -13 0 81.23 2.69
 -1 13 -1 776.31 24.38
 -1 13 -1 767.61 23.45
 1 13 1 775.57 24.22
 1 13 1 774.08 23.66
 1 -13 1 767.47 23.49
 1 -13 1 742.75 24.14
 -1 -13 -1 761.09 24.14
 -1 -13 -1 737.82 23.93
 -1 13 -2 56.77 2.17
 -1 13 -2 54.92 2.13
 1 13 2 59.94 2.32
 1 13 2 58.11 1.96
 -1 -13 -2 58.09 1.96
 -1 -13 -2 55.87 2.23
 -1 13 -3 16.79 0.74
 1 13 3 17.5 0.9
 1 13 3 15.7 0.7
 1 -13 3 15.75 0.73
 1 -13 3 15.57 0.67
 -1 -13 -3 16.8 0.72
 -1 -13 -3 16.03 0.85
 -1 13 -4 128.85 4.44
 -1 13 -4 136.09 4.83
 1 13 4 122.67 4.37
 1 13 4 128.04 4.5
 1 -13 4 133.04 4.73
 1 -13 4 129.35 4.27
 -1 -13 -4 127.57 4.33
 -1 -13 -4 130.04 4.26
 -1 13 -5 300.61 10.27
 -1 13 -5 312.81 10.61
 1 -13 5 304.38 10.24
 1 -13 5 291.34 9.99
 -1 13 -6 13.91 0.82
 -1 13 -6 12.77 0.79
 1 13 6 15.02 0.82
 1 13 6 14.65 0.71
 1 -13 6 14.11 0.71
 1 -13 6 14.18 0.75
 -1 -13 -6 11.94 0.66
 -1 -13 -6 14.98 0.68
 -1 13 -7 13.29 0.84
 -1 13 -7 14.25 1.09
 1 13 7 11.58 0.72
 1 13 7 11.58 0.61
 1 -13 7 13.28 0.97
 1 -13 7 11.95 0.72
 -1 -13 -7 13.08 0.77
 -1 -13 -7 11.66 0.59
 -1 13 -8 75.15 3.14
 -1 13 -8 72.08 2.64
 1 13 8 72.69 2.69
 1 13 8 65.78 2.65
 1 -13 8 70.02 2.98
 1 -13 8 72.46 2.96
 -1 -13 -8 72.85 2.57
 -1 -13 -8 70.28 2.53
 -1 13 -9 33.84 1.75
 -1 13 -9 33.6 1.37
 1 13 9 28.67 1.3
 1 13 9 32.52 1.34
 1 -13 9 30.68 1.75
 1 -13 9 35.4 1.69
 -1 -13 -9 32.81 1.27
 -1 -13 -9 31.69 1.33
 -1 13 -10 11.98 0.95
 1 13 10 11.72 0.74
 1 -13 10 10.86 0.83
 1 -13 10 10.19 0.77
 -1 13 -11 30.13 1.5
 -1 13 -11 28.36 1.94
 1 13 11 27.95 1.08
 1 -13 11 31.04 1.48
 1 -13 11 31.01 1.26
 -1 -13 -11 29.04 1.29
 -1 13 -12 25.94 1.47
 -1 13 -12 27.47 1.75
 1 -13 12 25.46 1.5
 -1 -13 -12 27.79 1.38
 -1 13 -13 24.95 1.25
 -1 13 -13 28.28 1.33
 1 13 13 23.58 1.1
 1 -13 13 27.06 1.28
 1 -13 13 20.33 1.49
 -1 13 -14 79.69 3.03
 -1 13 -14 78.92 3.05
 1 -13 14 77.9 2.72
 1 -13 14 79.76 2.77
 -1 13 -15 27.71 1.51
 -1 13 -15 20.65 1.64
 1 -13 15 27.82 1.6
 -1 13 -16 5.5 1.04
 1 -13 16 4.52 1.01
 1 14 -14 5.99 1.44
 -1 -14 14 5.11 1.44
 1 14 -13 2.38 0.96
 -1 -14 13 2.61 1.02
 -1 14 12 7.44 0.78
 1 14 -12 6.08 0.89
 1 -14 -12 6.92 0.65
 -1 -14 12 7.29 0.85
 -1 14 11 5.23 0.5
 1 14 -11 4.3 0.65
 1 14 -11 5.78 0.6
 1 -14 -11 3.94 0.5
 -1 -14 11 4.67 0.48
 -1 -14 11 4.76 0.57
 -1 14 10 -0.06 0.49
 1 14 -10 0.05 0.5
 1 14 -10 -0.86 0.63
 1 -14 -10 -0.35 0.47
 -1 -14 10 0.14 0.36
 -1 -14 10 0.09 0.5
 -1 14 9 -0.07 0.29
 -1 14 9 1.31 0.46
 1 14 -9 1.37 0.52
 1 14 -9 1.23 0.78
 1 -14 -9 1.57 0.57
 -1 -14 9 1.11 0.43
 -1 -14 9 0.35 0.61
 -1 14 8 39.46 1.57
 -1 14 8 42.82 1.68
 1 -14 -8 39.11 1.91
 1 -14 -8 43.77 1.53
 -1 -14 8 36.54 1.65
 -1 14 7 99.51 3.44
 -1 14 7 110.87 3.51
 1 14 -7 98.89 3.67
 1 14 -7 101.32 3.77
 1 -14 -7 104.37 3.93
 1 -14 -7 97.73 3.38
 -1 -14 7 100.38 3.62
 -1 14 6 1.91 0.37
 -1 14 6 1.7 0.49
 1 14 -6 1.3 0.48
 1 14 -6 1.16 0.5
 1 -14 -6 1.03 0.36
 1 -14 -6 1.57 0.34
 -1 -14 6 1.06 0.35
 -1 -14 6 1.08 0.46
 -1 14 5 8.13 0.79
 -1 14 5 4.46 0.5
 1 14 -5 3.61 0.52
 1 14 -5 5.19 0.62
 1 -14 -5 4.53 0.45
 1 -14 -5 7.25 0.71
 -1 -14 5 4.18 0.45
 -1 -14 5 5.63 0.56
 -1 14 4 138.53 4.64
 -1 14 4 140.68 4.95
 1 14 -4 134.99 4.78
 1 14 -4 141.19 4.72
 1 -14 -4 132.74 4.69
 1 -14 -4 146.02 4.85
 -1 -14 4 136.99 4.78
 -1 -14 4 144.43 4.73
 -1 14 3 28.18 1.25
 -1 14 3 29.94 1.18
 1 14 -3 28.82 1.31
 1 14 -3 25.81 1.12
 1 -14 -3 30.21 1.07
 1 -14 -3 31.59 1.37
 -1 -14 3 27.19 1.15
 -1 -14 3 25.26 1.38
 -1 14 2 0.83 0.45
 -1 14 2 0.56 0.31
 1 14 -2 1.69 0.91
 1 14 -2 1.64 0.77
 1 -14 -2 0.97 0.32
 1 -14 -2 0.82 0.35
 -1 -14 2 1.15 0.72
 -1 -14 2 0.94 0.65
 -1 14 1 11.5 0.69
 -1 14 1 13.35 0.97
 1 14 -1 13.41 0.78
 1 14 -1 13.05 0.65
 1 -14 -1 13.52 0.96
 1 -14 -1 11.42 0.64
 -1 -14 1 12.43 0.69
 -1 -14 1 12.36 0.74
 -1 14 0 167.21 5.5
 -1 14 0 167.35 5.34
 1 14 0 158.47 5.67
 1 14 0 170.29 5.88
 1 -14 0 169.81 5.39
 1 -14 0 168.17 5.49
 -1 -14 0 174.94 5.95
 -1 -14 0 170.97 5.31
 -1 14 -1 29.26 1.26
 -1 14 -1 27.55 1.03
 1 14 1 26.19 1.24
 1 14 1 25.64 1.22
 1 -14 1 26.6 1
 1 -14 1 29.1 1.2
 -1 -14 -1 28.57 1.06
 -1 -14 -1 28.24 1.01
 -1 14 -2 15.11 0.96
 -1 14 -2 15.71 0.89
 1 14 2 14.96 0.78
 1 14 2 14.29 0.81
 1 -14 2 13.27 0.82
 -1 -14 -2 14.7 0.73
 -1 -14 -2 16.18 0.66
 1 14 3 3.19 0.65
 1 14 3 3.59 0.62
 1 -14 3 1.95 0.6
 1 -14 3 0.58 0.49
 -1 -14 -3 1.48 0.45
 -1 -14 -3 2.52 0.56
 -1 14 -4 6.97 0.96
 -1 14 -4 9.77 1.17
 1 14 4 8.91 0.89
 1 14 4 8.87 0.85
 1 -14 4 6.29 0.9
 -1 -14 -4 6.55 0.86
 -1 14 -5 23.42 1.26
 -1 14 -5 23.74 1.17
 1 14 5 27.09 1.16
 1 14 5 27.05 1.07
 1 -14 5 23.5 1.16
 1 -14 5 23.55 1.21
 -1 -14 -5 26.52 1.29
 -1 -14 -5 25.26 1.02
 -1 14 -6 0.24 0.41
 -1 14 -6 -0.58 0.71
 1 14 6 0.31 0.45
 1 14 6 0.43 0.4
 1 -14 6 0.17 0.58
 1 -14 6 0.14 0.35
 -1 -14 -6 0.22 0.23
 -1 -14 -6 -0.27 0.32
 -1 14 -7 58.36 2.5
 -1 14 -7 74.08 2.98
 1 14 7 65.2 2.41
 1 14 7 64.57 2.34
 1 -14 7 67.29 2.86
 1 -14 7 58.1 2.42
 -1 -14 -7 61.56 2.31
 -1 -14 -7 60.5 2.4
 -1 14 -8 4.63 0.88
 -1 14 -8 1.74 0.49
 1 14 8 2.62 0.55
 1 14 8 1.52 0.67
 1 -14 8 1.4 0.43
 1 -14 8 3.43 0.7
 -1 -14 -8 1.94 0.42
 -1 -14 -8 1.89 0.61
 -1 14 -9 18.48 1.47
 -1 14 -9 21.7 1.11
 1 14 9 21.91 1.01
 1 -14 9 19.05 1.31
 1 -14 9 22.07 0.99
 -1 -14 -9 20.52 1
 -1 14 -10 6.87 0.69
 1 14 10 5.73 0.6
 1 -14 10 6.92 0.78
 1 -14 10 6.88 0.46
 -1 -14 -10 7.31 0.66
 -1 14 -11 6.11 0.79
 -1 14 -11 5.51 0.84
 1 14 11 4.85 0.69
 1 -14 11 7.04 0.73
 -1 -14 -11 5.93 0.79
 -1 14 -12 2.99 0.87
 -1 14 -12 2.66 0.86
 1 14 12 2.63 0.57
 1 14 12 2.58 0.72
 1 -14 12 4.39 0.8
 -1 -14 -12 2.17 0.79
 -1 14 -13 0.4 0.88
 -1 14 -13 0.56 0.64
 1 14 13 2.09 1
 1 -14 13 -0.07 0.78
 1 -14 13 0.28 0.61
 -1 14 -14 171.05 5.62
 -1 14 -14 174.26 5.76
 1 -14 14 167.93 5.52
 1 -14 14 177.07 5.86
 -1 14 -15 15.25 1.23
 1 -14 15 14.38 1.36
 -1 15 14 87.17 3.34
 -1 15 14 85.03 3.13
 1 15 -14 87.4 3.03
 1 15 -14 84.1 3.33
 -1 -15 14 88.8 3.01
 -1 15 13 2.35 0.74
 1 15 -13 1.21 0.96
 1 15 -13 3.31 0.99
 1 -15 -13 3.74 1.04
 1 -15 -13 2.23 0.58
 -1 -15 13 2.81 0.95
 -1 -15 13 3.19 1
 -1 15 12 56 2.33
 -1 15 12 47.7 2.2
 1 15 -12 57.13 2.09
 1 15 -12 56.39 1.94
 1 -15 -12 52.98 2.7
 1 -15 -12 53.67 2.13
 -1 -15 12 57.54 2.12
 -1 -15 12 52.1 2.09
 1 15 -11 4.08 0.63
 1 15 -11 3.28 0.48
 1 -15 -11 3.35 0.59
 -1 -15 11 3.5 0.75
 -1 15 10 11.16 0.94
 1 15 -10 10.55 0.94
 1 15 -10 10.92 1.06
 1 -15 -10 10.06 0.68
 1 -15 -10 10.22 0.75
 -1 -15 10 10.23 0.88
 -1 -15 10 10.79 0.96
 1 15 -9 9.18 1.01
 1 15 -9 12.97 1.28
 1 -15 -9 9.17 0.74
 -1 -15 9 10.21 0.96
 -1 -15 9 9.53 1.03
 -1 15 8 17.63 1.07
 -1 15 8 17.18 0.99
 1 15 -8 15.59 1
 1 15 -8 23.34 1.38
 1 -15 -8 21.36 1.05
 1 -15 -8 18.74 1.24
 -1 15 7 -0.81 0.51
 -1 15 7 -0.01 0.37
 1 15 -7 -0.31 0.44
 1 15 -7 -0.2 0.42
 1 -15 -7 0.2 0.32
 1 -15 -7 0.01 0.3
 -1 -15 7 -0.15 0.36
 -1 -15 7 0.08 0.35
 -1 15 6 5.79 0.61
 -1 15 6 5.64 0.52
 1 15 -6 4.19 0.6
 1 15 -6 4.25 0.52
 1 -15 -6 4.21 0.43
 1 -15 -6 5.38 0.47
 -1 -15 6 3.51 0.34
 -1 -15 6 4.43 0.5
 -1 15 5 61.39 2.38
 -1 15 5 54.65 2.1
 1 15 -5 58.2 2.42
 1 15 -5 55.84 2.09
 1 -15 -5 58.53 2.01
 1 -15 -5 58.51 2.68
 -1 -15 5 58.09 2.13
 -1 -15 5 59.22 2.12
 -1 15 4 48.78 1.94
 -1 15 4 49.21 2.12
 1 15 -4 57.04 2.48
 1 15 -4 52.48 2.23
 1 -15 -4 49.64 1.8
 1 -15 -4 48.28 2.05
 -1 -15 4 58.51 2.17
 -1 -15 4 58.07 2.13
 -1 15 3 17.02 0.92
 -1 15 3 17.65 1.16
 1 15 -3 17.87 0.89
 1 15 -3 16.51 0.83
 1 -15 -3 17.8 1.13
 1 -15 -3 16.87 1.02
 -1 -15 3 18.13 0.79
 -1 -15 3 17.57 0.85
 -1 15 2 8.2 0.57
 -1 15 2 9.49 0.77
 1 15 -2 7.38 0.69
 1 15 -2 7.81 0.65
 1 -15 -2 11.11 0.71
 1 -15 -2 8.64 0.64
 -1 -15 2 7.52 0.59
 -1 -15 2 7.36 0.62
 -1 15 1 11.41 0.75
 -1 15 1 10.54 0.58
 1 15 -1 10.84 0.69
 1 15 -1 10.58 0.6
 1 -15 -1 10.13 0.51
 1 -15 -1 10.89 0.68
 -1 -15 1 11.02 0.71
 -1 -15 1 10.41 0.57
 -1 15 0 260.69 8.22
 -1 15 0 257.72 8.08
 1 15 0 255.41 8.36
 1 15 0 266.03 8.12
 1 -15 0 253.08 8.17
 1 -15 0 262.89 8.46
 -1 -15 0 255.48 8.27
 -1 -15 0 260.65 8.42
 -1 15 -1 3.98 0.57
 -1 15 -1 4.54 0.44
 1 15 1 4.69 0.47
 1 15 1 4.48 0.38
 1 -15 1 4.93 0.43
 1 -15 1 3.46 0.42
 -1 -15 -1 3.65 0.47
 -1 -15 -1 4.48 0.44
 -1 15 -2 37.26 1.81
 -1 15 -2 33.09 1.44
 1 15 2 40.04 1.49
 1 15 2 37.68 1.46
 1 -15 2 36.75 1.38
 1 -15 2 35.89 1.67
 -1 -15 -2 37.88 1.45
 -1 -15 -2 34.88 1.59
 -1 15 -3 2.25 0.62
 -1 15 -3 1.94 0.51
 1 15 3 3.02 0.47
 1 15 3 2.41 0.43
 -1 -15 -3 0.94 0.34
 -1 -15 -3 1.66 0.38
 -1 15 -4 11.92 1.22
 1 15 4 10.58 0.74
 1 15 4 11.86 0.73
 1 -15 4 9.1 0.91
 1 -15 4 13.14 1.21
 -1 -15 -4 8.96 0.63
 -1 -15 -4 9.62 0.7
 -1 15 -5 10.03 0.89
 -1 15 -5 9.06 0.7
 1 15 5 10.56 0.84
 1 15 5 11.22 0.78
 1 -15 5 8.03 0.63
 1 -15 5 10.26 0.85
 -1 -15 -5 9.85 0.93
 -1 -15 -5 10.1 0.75
 -1 15 -6 0.04 0.52
 -1 15 -6 1.43 0.88
 1 15 6 3.22 0.79
 1 -15 6 -0.03 0.74
 1 -15 6 -0.01 0.45
 -1 -15 -6 2.2 0.62
 -1 15 -7 -0.03 0.5
 -1 15 -7 0.01 0.58
 1 15 7 -0.03 0.45
 1 15 7 0.44 0.53
 1 -15 7 0.67 0.48
 1 -15 7 0.88 0.43
 -1 -15 -7 0.06 0.47
 -1 15 -8 56.63 2.8
 -1 15 -8 62.65 2.39
 1 15 8 60.83 2.51
 1 15 8 63.87 2.23
 1 -15 8 55.88 2.57
 1 -15 8 61.13 2.32
 -1 -15 -8 63.35 2.38
 -1 -15 -8 67.38 2.25
 -1 15 -9 33.25 1.64
 1 15 9 28.94 1.36
 1 -15 9 32.16 1.38
 1 -15 9 31.51 1.34
 -1 -15 -9 34.22 1.35
 -1 15 -10 3.76 0.82
 -1 15 -10 4.04 0.92
 1 15 10 3.61 0.64
 1 -15 10 3.26 0.69
 1 -15 10 3.83 0.66
 -1 -15 -10 3.19 0.73
 -1 15 -11 10.66 1.02
 -1 15 -11 10.41 0.96
 1 15 11 9.74 0.84
 1 -15 11 10.77 0.89
 -1 -15 -11 9.76 1.07
 -1 15 -12 40.96 1.81
 -1 15 -12 41.1 1.76
 1 15 12 38.93 1.86
 1 -15 12 40.99 1.71
 -1 -15 -12 37.55 1.68
 -1 15 -13 57.34 2.12
 -1 15 -13 58.94 2.3
 1 15 13 48.8 2.21
 1 -15 13 54.79 1.99
 -1 15 -14 1.94 1.01
 1 -15 14 1.67 0.9
 1 -15 14 1.95 0.73
 -1 16 13 39.85 1.9
 1 16 -13 42.9 1.79
 1 16 -13 39.57 1.72
 -1 -16 13 40.71 1.67
 -1 -16 13 38.17 1.76
 -1 16 12 2.37 0.84
 1 16 -12 1.74 1.02
 1 -16 -12 4.07 0.84
 -1 -16 12 2.14 0.88
 -1 -16 12 1.53 0.71
 -1 16 11 14.96 1.07
 1 16 -11 12.67 1.34
 1 -16 -11 15.34 0.96
 -1 -16 11 12.78 1.22
 -1 16 10 70.46 3.48
 1 16 -10 55.34 2.69
 1 16 -10 67.05 2.48
 1 -16 -10 63.16 2.33
 1 -16 -10 63.01 2.4
 -1 -16 10 56.98 2.53
 -1 -16 10 65.96 2.46
 1 16 -9 2.69 0.82
 1 -16 -9 1.88 0.53
 -1 -16 9 1.43 0.7
 -1 -16 9 3.6 0.65
 -1 16 8 0.45 0.48
 1 16 -8 -0.25 0.72
 1 16 -8 0.15 0.77
 1 -16 -8 0.13 0.28
 1 -16 -8 0.48 0.55
 -1 16 7 38.69 1.59
 -1 16 7 35.45 1.35
 1 16 -7 37.36 1.5
 1 16 -7 32.78 1.58
 1 -16 -7 36.61 1.36
 1 -16 -7 29.13 1.55
 -1 -16 7 38.15 1.47
 -1 16 6 2.07 0.43
 1 16 -6 3.76 0.68
 1 -16 -6 1.54 0.42
 1 -16 -6 1.37 0.35
 -1 -16 6 5.51 0.78
 -1 -16 6 2.99 0.57
 -1 16 5 17.6 1.07
 -1 16 5 18.49 0.82
 1 16 -5 16.54 0.97
 1 16 -5 16.31 0.89
 1 -16 -5 18.3 0.91
 1 -16 -5 17 1.14
 -1 -16 5 16.61 0.9
 -1 -16 5 16.36 0.83
 -1 16 4 38.91 1.5
 -1 16 4 46.12 1.66
 1 16 -4 39.75 1.69
 1 16 -4 36.38 1.73
 1 -16 -4 45.43 1.59
 1 -16 -4 42.44 1.59
 -1 -16 4 41.26 1.54
 -1 -16 4 33.57 1.95
 -1 16 3 2.78 0.43
 -1 16 3 2.82 0.48
 1 16 -3 1.8 0.51
 1 16 -3 2.63 0.5
 1 -16 -3 2.65 0.47
 1 -16 -3 2.33 0.34
 -1 -16 3 2.42 0.38
 -1 -16 3 2.88 0.34
 -1 16 2 17.37 1.12
 -1 16 2 16.18 0.79
 1 16 -2 16.23 0.92
 1 16 -2 17.77 0.85
 1 -16 -2 15.77 0.78
 1 -16 -2 17.42 1.18
 -1 -16 2 17.34 0.85
 -1 -16 2 16.23 0.91
 -1 16 1 3.14 0.55
 -1 16 1 2.84 0.47
 1 16 -1 2.96 0.56
 1 16 -1 3.03 0.48
 1 -16 -1 2.07 0.43
 1 -16 -1 3.33 0.47
 -1 -16 1 3.47 0.43
 -1 -16 1 2.96 0.45
 -1 16 0 101.08 3.91
 -1 16 0 98.88 3.34
 1 16 0 105.07 3.5
 1 16 0 100.38 3.76
 1 -16 0 107.29 3.45
 1 -16 0 100.78 3.74
 -1 -16 0 95.32 3.31
 -1 -16 0 99.56 3.31
 -1 16 -1 3.19 0.59
 -1 16 -1 2.95 0.41
 1 16 1 1.56 0.59
 1 16 1 1.9 0.45
 1 -16 1 3.21 0.38
 1 -16 1 2.8 0.42
 -1 -16 -1 2.13 0.42
 -1 16 -2 44.39 2.16
 -1 16 -2 40.81 1.65
 1 16 2 47.17 1.65
 1 16 2 43.11 1.67
 1 -16 2 42.56 1.64
 1 -16 2 42.8 1.81
 -1 -16 -2 43.55 1.79
 -1 -16 -2 43.94 1.6
 -1 16 -3 1.53 0.61
 -1 16 -3 1.33 0.62
 1 16 3 1.55 0.49
 1 16 3 1.94 0.49
 1 -16 3 2.24 0.58
 -1 -16 -3 1.77 0.29
 -1 -16 -3 1.21 0.39
 1 16 4 13.35 1.07
 1 16 4 12.66 0.92
 1 -16 4 9.1 0.81
 1 -16 4 11.22 0.91
 -1 -16 -4 13.94 0.95
 -1 -16 -4 10.88 0.86
 -1 16 -5 0.62 0.63
 -1 16 -5 0.46 0.68
 1 16 5 0.84 0.5
 1 16 5 0.21 0.61
 1 -16 5 0.78 0.56
 1 -16 5 0.39 0.52
 -1 -16 -5 -0.15 0.37
 -1 -16 -5 0.13 0.48
 -1 16 -6 34.79 2.05
 -1 16 -6 36.83 1.76
 1 -16 6 36.22 1.75
 1 -16 6 37.11 1.95
 -1 16 -7 6.97 0.83
 -1 16 -7 4.52 0.75
 1 16 7 5.03 0.64
 1 16 7 4.96 0.69
 1 -16 7 3.73 0.64
 1 -16 7 6.2 0.79
 -1 -16 -7 4.72 0.68
 -1 16 -8 2.5 0.77
 -1 16 -8 2.68 0.55
 1 16 8 1.92 0.63
 1 16 8 2.92 0.73
 1 -16 8 2.38 0.64
 1 -16 8 2.83 0.38
 -1 -16 -8 0.96 0.42
 -1 -16 -8 3.66 0.71
 -1 16 -9 0.13 0.83
 -1 16 -9 0.65 0.92
 1 16 9 0.3 0.78
 1 -16 9 1.01 0.65
 1 -16 9 0.63 0.66
 -1 -16 -9 0.92 0.73
 -1 16 -10 43.1 2.35
 -1 16 -10 51.35 1.83
 1 16 10 42.92 1.75
 1 -16 10 46.2 1.85
 1 -16 10 50.27 2.01
 -1 -16 -10 49.19 2.08
 -1 16 -11 2.9 0.93
 -1 16 -11 2.23 0.92
 1 16 11 1.99 0.92
 1 -16 11 2.14 0.82
 -1 -16 -11 1.77 0.78
 -1 16 -12 56.51 2.3
 -1 16 -12 51.68 2.98
 1 16 12 51.11 2.17
 1 -16 12 49.08 2.15
 -1 -16 -12 52.22 2.54
 -1 -16 -12 56.97 2.14
 -1 16 -13 4.32 1.01
 -1 16 -13 4.56 1.01
 1 -16 13 4.05 0.9
 1 -16 13 2.52 0.75
 -1 17 11 28.73 1.29
 1 17 -11 25.9 1.46
 1 -17 -11 27.7 1.34
 -1 -17 11 27 1.25
 -1 17 10 66.69 2.42
 1 17 -10 62.01 2.56
 1 17 -10 66.15 2.37
 1 -17 -10 58.58 2.6
 1 -17 -10 67.47 3.5
 -1 -17 10 62.35 2.37
 -1 -17 10 65.77 2.38
 -1 17 9 -0.31 0.71
 1 -17 -9 1.02 0.69
 -1 -17 9 0.27 0.8
 -1 -17 9 0.26 0.94
 -1 17 8 3.21 1.14
 -1 17 8 3.07 0.78
 1 17 -8 4.8 0.99
 1 17 -8 5.06 1.09
 1 -17 -8 3.76 0.68
 1 -17 -8 3.88 0.93
 -1 -17 8 4.08 0.85
 -1 17 7 1.33 0.64
 -1 17 7 2.29 0.5
 1 17 -7 1.59 0.83
 1 17 -7 2.09 0.77
 1 -17 -7 1.17 0.45
 1 -17 -7 0.96 0.35
 -1 -17 7 1.68 0.63
 -1 -17 7 1.39 0.67
 -1 17 6 27.38 1.2
 1 17 -6 30.84 1.4
 1 17 -6 27.63 1.43
 1 -17 -6 22.21 1.43
 -1 -17 6 29.03 1.25
 -1 -17 6 25.41 1.4
 -1 17 5 10.35 1.02
 -1 17 5 8.64 0.85
 1 17 -5 9.98 1.1
 1 17 -5 8.02 1.04
 1 -17 -5 8.36 0.75
 1 -17 -5 10.58 0.85
 -1 -17 5 11.07 0.91
 -1 -17 5 7.8 0.82
 -1 17 4 7.89 0.85
 -1 17 4 6.48 1
 1 17 -4 6.28 1.25
 1 17 -4 8.04 0.94
 1 -17 -4 6.3 0.7
 1 -17 -4 5.66 0.72
 -1 -17 4 7.57 1.04
 -1 -17 4 7.38 0.9
 -1 17 3 9.84 1.04
 -1 17 3 7.32 0.56
 1 17 -3 11.35 1.22
 1 -17 -3 7.85 0.55
 1 -17 -3 8.17 0.73
 -1 -17 3 9.58 1.11
 -1 17 2 37.29 1.57
 -1 17 2 29.07 1.46
 1 17 -2 32.16 1.68
 1 17 -2 34.56 2.09
 1 -17 -2 32.52 1.3
 -1 -17 2 31.87 1.6
 -1 -17 2 36.04 1.47
 -1 17 1 1.44 0.83
 -1 17 1 0.7 0.45
 1 17 -1 0.85 0.59
 1 17 -1 1.78 0.83
 1 -17 -1 0.26 0.43
 1 -17 -1 1.48 0.66
 -1 -17 1 1.08 0.5
 -1 -17 1 0.93 0.44
 -1 17 0 5.34 0.81
 -1 17 0 5.47 0.7
 1 17 0 4.57 0.66
 1 17 0 6.51 0.73
 1 -17 0 5.87 0.58
 1 -17 0 5.03 0.62
 -1 -17 0 5.67 0.72
 -1 -17 0 5.46 0.41
 -1 17 -1 -0.03 0.59
 -1 17 -1 0.78 0.86
 1 17 1 -0.2 0.69
 1 17 1 -0.14 0.51
 1 -17 1 -0.04 0.3
 1 -17 1 -0.04 0.38
 -1 -17 -1 0.05 0.31
 -1 -17 -1 0.06 0.29
 -1 17 -2 9.46 1.23
 -1 17 -2 10.16 1.28
 1 17 2 10.42 0.91
 1 17 2 8.71 0.71
 1 -17 2 8.32 0.74
 1 -17 2 8.82 0.85
 -1 -17 -2 9.96 0.83
 -1 -17 -2 9.86 0.7
 -1 17 -3 14.88 1.39
 -1 17 -3 16.73 1.32
 1 17 3 15.98 1.17
 1 17 3 14.3 0.77
 1 -17 3 18.54 0.97
 1 -17 3 15.84 1.14
 -1 -17 -3 14.12 0.83
 -1 -17 -3 11.75 0.95
 1 17 4 64.17 2.68
 1 17 4 74.67 2.66
 1 -17 4 66.31 2.7
 1 -17 4 79.63 2.87
 -1 -17 -4 75.9 2.57
 -1 -17 -4 73.6 2.46
 -1 17 -5 50.31 1.78
 -1 17 -5 51.86 1.97
 1 17 5 45.04 2.13
 1 -17 5 46.69 1.94
 1 -17 5 51.72 1.95
 -1 -17 -5 49.27 1.93
 -1 -17 -5 44.95 1.73
 -1 17 -6 3.47 0.81
 -1 17 -6 3.43 0.8
 1 17 6 4.18 0.93
 1 17 6 2.44 0.67
 1 -17 6 3.55 0.93
 1 -17 6 3.74 0.8
 -1 -17 -6 2.42 0.85
 -1 -17 -6 2.24 0.6
 -1 17 -7 1.57 0.74
 -1 17 -7 1.04 0.66
 1 17 7 2.72 0.69
 1 -17 7 1.6 0.73
 -1 -17 -7 2.2 0.56
 -1 17 -8 0.74 0.59
 -1 17 -8 0.7 0.46
 1 17 8 0.17 0.91
 1 17 8 0.93 0.8
 1 -17 8 1.96 0.82
 1 -17 8 0.61 0.41
 -1 -17 -8 0.96 0.95
 -1 -17 -8 0 0.67
 -1 17 -9 8.63 1.12
 -1 17 -9 14.37 1.35
 1 17 9 11.23 0.94
 1 -17 9 7.14 1.07
 1 -17 9 12.39 1.22
 -1 -17 -9 14.78 1.1
 -1 17 -10 11.74 1.18
 -1 17 -10 12.67 1.27
 1 17 10 12.2 1.24
 1 -17 10 14.47 1
 -1 -17 -10 13.53 1.43
 -1 17 -11 0.34 0.93
 -1 17 -11 1.51 0.87
 1 17 11 0.75 0.87
 1 -17 11 0.35 0.81
 -1 -17 -11 1.18 1.16
 1 18 -10 51.29 2.01
 -1 -18 10 43.46 2.56
 -1 -18 10 52.05 2.1
 -1 18 9 11.02 0.83
 1 18 -9 6.6 1.2
 1 18 -9 10.22 1.21
 1 -18 -9 8.19 1.05
 -1 18 8 57.21 3.32
 -1 18 8 58.72 2.72
 1 18 -8 53.74 2.51
 1 18 -8 52.06 3.25
 1 -18 -8 59.4 2.33
 1 -18 -8 65.17 2.38
 -1 -18 8 57.26 2.24
 -1 -18 8 43.02 3.37
 -1 18 7 57.75 2.21
 -1 18 7 68.06 2.47
 1 18 -7 60.45 2.77
 1 18 -7 64.06 2.5
 1 -18 -7 49.52 2.58
 -1 -18 7 62.13 2.69
 -1 -18 7 64.27 2.37
 -1 18 6 3.38 0.99
 1 18 -6 4.51 1.4
 1 18 -6 5.07 1.18
 1 -18 -6 4.9 0.89
 -1 -18 6 4.29 1.14
 -1 -18 6 2.83 0.82
 -1 18 5 7.13 0.93
 -1 18 5 7.16 0.91
 1 18 -5 7.6 1.09
 1 18 -5 9.54 0.94
 1 -18 -5 6.94 0.61
 1 -18 -5 6.78 0.75
 -1 -18 5 7.87 0.86
 -1 -18 5 7.17 0.9
 -1 18 4 8.81 0.95
 -1 18 4 11.44 1.04
 1 18 -4 12.05 1.12
 1 18 -4 9.66 1.06
 1 -18 -4 10.8 0.83
 1 -18 -4 9.56 0.89
 -1 -18 4 10.9 0.89
 -1 -18 4 9.69 1.08
 -1 18 3 5.6 1.04
 -1 18 3 5.03 0.78
 1 18 -3 5.92 1.1
 1 18 -3 4.8 0.85
 1 -18 -3 4.76 0.7
 1 -18 -3 4.59 0.97
 -1 -18 3 5.19 0.71
 -1 -18 3 5.22 0.84
 -1 18 2 6.19 1.02
 -1 18 2 6.79 1.03
 1 18 -2 3.63 0.83
 1 18 -2 7.84 1.16
 1 -18 -2 5.02 0.95
 -1 -18 2 5.78 0.89
 -1 -18 2 6.48 1
 -1 18 1 15.91 1.31
 -1 18 1 19.3 1
 1 18 -1 15.93 0.93
 1 18 -1 17.4 1.01
 1 -18 -1 16.27 0.91
 -1 -18 1 17.17 1.14
 -1 -18 1 18.48 0.99
 -1 18 0 68.95 2.44
 -1 18 0 71.53 2.78
 1 18 0 64.81 2.59
 1 18 0 69.52 2.52
 1 -18 0 59.89 2.55
 1 -18 0 73.55 2.33
 -1 -18 0 60.33 2.44
 -1 -18 0 67.05 2.38
 -1 18 -1 24.82 1.27
 -1 18 -1 18.81 1.52
 1 18 1 28.21 1.65
 1 18 1 26.21 1.27
 1 -18 1 25.38 1.24
 1 -18 1 24.49 1.13
 -1 -18 -1 27.39 1.24
 -1 -18 -1 25.76 1.1
 -1 18 -2 92.56 3.64
 -1 18 -2 85.64 2.96
 1 18 2 85.85 2.88
 1 18 2 87.89 3.16
 1 -18 2 81.98 2.91
 1 -18 2 81.96 3.45
 -1 -18 -2 80.88 2.99
 -1 -18 -2 89.01 2.99
 -1 18 -3 27.85 1.78
 -1 18 -3 25.6 1.55
 1 18 3 23.51 1.26
 1 18 3 27.12 1.27
 1 -18 3 22.99 1.44
 1 -18 3 25.45 1.45
 -1 -18 -3 22.52 1.35
 -1 -18 -3 26.44 1.57
 -1 18 -4 0.17 0.9
 -1 18 -4 0.6 0.97
 1 18 4 1.54 1.03
 1 18 4 0.74 0.72
 -1 -18 -4 0.6 0.69
 -1 -18 -4 0.34 0.68
 -1 18 -5 20.15 1.25
 -1 18 -5 19 1.32
 1 18 5 15.55 1.12
 1 -18 5 20.12 1.56
 1 -18 5 19.83 1.36
 -1 -18 -5 15.93 1.35
 -1 -18 -5 16.5 0.97
 -1 18 -6 87.75 3.02
 -1 18 -6 73.62 3.33
 1 18 6 87.86 3.09
 1 -18 6 85.97 3.62
 1 -18 6 87.14 3.13
 -1 -18 -6 85.74 3.37
 -1 -18 -6 88.96 3.11
 -1 18 -7 5.12 0.92
 1 18 7 2.81 0.97
 1 -18 7 5.44 0.93
 -1 -18 -7 2.45 1.09
 -1 18 -8 38.14 1.58
 1 18 8 30.93 1.91
 1 -18 8 38.18 1.62
 -1 -18 -8 35.2 2.78
 -1 -18 -8 34.27 1.98
 -1 18 -9 5.07 1.05
 1 18 9 4.06 1
 1 -18 9 3.28 0.89
 -1 -18 -9 4.33 1
 -1 18 -10 31.48 1.58
 1 18 10 30.04 2.04
 1 -18 10 30.16 1.37
 -1 -18 -10 23.47 2.36
 -1 19 8 87.63 4.04
 -1 19 8 95.22 3.4
 1 19 -8 74.07 3.24
 1 -19 -8 91.31 3.72
 1 -19 -8 100.55 3.33
 -1 -19 8 80.78 3.2
 -1 19 7 5.76 0.93
 -1 19 7 5.01 1.12
 1 19 -7 2.3 1.12
 1 19 -7 3.65 1.33
 1 -19 -7 5.98 0.97
 -1 -19 7 4.76 0.96
 -1 -19 7 3.65 1.12
 -1 19 6 21.23 1.29
 1 19 -6 18.49 1.13
 1 19 -6 16.53 1.13
 1 -19 -6 17.87 1.45
 -1 -19 6 18.53 1.11
 -1 -19 6 15.92 0.95
 -1 19 5 104.26 4
 -1 19 5 114.57 3.89
 1 19 -5 100.18 3.54
 1 19 -5 107.07 4.47
 1 -19 -5 111.54 4.59
 1 -19 -5 110.78 3.76
 -1 -19 5 105.03 3.41
 -1 19 4 64.96 2.4
 1 19 -4 70.48 2.56
 1 19 -4 67.31 2.55
 1 -19 -4 64.3 2.9
 1 -19 -4 69.59 2.61
 -1 -19 4 70.46 2.24
 -1 -19 4 68.96 2.56
 -1 19 3 49.54 2.25
 -1 19 3 50.71 2.04
 1 19 -3 47.51 2.08
 1 19 -3 50.78 1.87
 1 -19 -3 40.95 2.56
 1 -19 -3 50.67 2.33
 -1 -19 3 46.01 2.36
 -1 -19 3 53.57 2.13
 -1 19 2 35.26 2.37
 -1 19 2 43.78 1.69
 1 19 -2 42.27 1.94
 1 19 -2 42.53 1.6
 1 -19 -2 40.73 1.93
 -1 -19 2 41.27 1.65
 -1 -19 2 44.11 1.82
 -1 19 1 13.01 1
 -1 19 1 15.49 1.1
 1 19 -1 14.02 1.29
 1 19 -1 17.13 0.92
 1 -19 -1 15.92 0.87
 -1 -19 1 15.45 0.97
 -1 -19 1 13.57 1.06
 -1 19 0 39.7 1.59
 -1 19 0 33.01 2.15
 1 19 0 38.92 1.77
 1 19 0 37.96 1.49
 1 -19 0 37 1.89
 1 -19 0 40.22 1.48
 -1 -19 0 39.48 1.68
 -1 -19 0 41.35 1.59
 -1 19 -1 3.16 0.87
 -1 19 -1 2.14 0.56
 1 19 1 2.01 0.88
 1 19 1 2.61 0.87
 1 -19 1 1.32 0.63
 1 -19 1 3.56 0.8
 -1 -19 -1 2.03 0.62
 -1 -19 -1 2.15 0.72
 -1 19 -2 42.98 2.01
 -1 19 -2 44.94 1.98
 1 19 2 47.97 1.72
 1 19 2 48.38 1.97
 1 -19 2 36.31 2.21
 1 -19 2 47.94 2.63
 -1 -19 -2 42.32 1.76
 -1 -19 -2 50.33 1.87
 -1 19 -3 26.71 1.64
 -1 19 -3 27.56 1.49
 1 19 3 22.37 1.57
 1 19 3 28.21 1.33
 1 -19 3 25.56 1.37
 1 -19 3 27.22 1.45
 -1 -19 -3 22.18 1.48
 -1 -19 -3 28.87 1.4
 -1 19 -4 66.65 3.26
 -1 19 -4 71.75 2.43
 1 19 4 77.14 2.61
 1 -19 4 65.36 3.14
 -1 -19 -4 65.69 2.75
 -1 -19 -4 73.75 2.82
 1 19 5 71.57 2.76
 1 -19 5 75.49 2.88
 1 -19 5 60.95 3.51
 -1 -19 -5 76.53 2.84
 -1 -19 -5 77.26 2.76
 -1 19 -6 0.66 1
 1 19 6 0.86 0.87
 1 -19 6 0.88 0.9
 -1 -19 -6 0.38 0.96
 -1 19 -7 12.07 1.71
 1 19 7 17.13 1.29
 1 -19 7 14.05 1.53
 -1 -19 -7 15.68 1.52
 -1 19 -8 126.36 4.47
 1 19 8 141.86 5.65
 1 19 8 133.01 4.59
 1 -19 8 124.27 4.58
 -1 -19 -8 152.13 4.81
 -1 -19 -8 124.76 4.76
 -1 20 5 0.8 0.94
 -1 20 5 2.16 0.81
 1 20 -5 1.36 0.9
 1 20 -5 1.4 0.93
 1 -20 -5 1.67 0.81
 -1 -20 5 0.89 0.48
 -1 20 4 0.03 0.77
 -1 20 4 0.24 0.71
 1 20 -4 0.67 0.83
 1 20 -4 0.1 0.67
 1 -20 -4 0.7 0.6
 1 -20 -4 0.16 0.72
 -1 -20 4 0.46 0.67
 -1 -20 4 0 0.8
 -1 20 3 3.63 0.87
 -1 20 3 1.66 0.67
 1 20 -3 0.24 0.59
 1 20 -3 3.97 1.05
 1 -20 -3 3.11 0.81
 1 -20 -3 1.18 0.89
 -1 -20 3 3.91 0.79
 -1 -20 3 2.92 1.03
 -1 20 2 67.22 3.5
 -1 20 2 71.3 2.63
 1 20 -2 67.63 3.31
 1 20 -2 75.36 2.69
 1 -20 -2 80.53 2.85
 1 -20 -2 82.75 2.91
 -1 -20 2 77.14 2.84
 -1 -20 2 66.09 3.7
 -1 20 1 14.83 1.23
 1 20 -1 13.97 1.14
 1 20 -1 16.02 1
 1 -20 -1 16.27 1
 -1 -20 1 14.83 0.97
 -1 -20 1 14.71 1.3
 -1 20 0 7.09 0.91
 1 20 0 7 1
 1 20 0 9.97 1.01
 1 -20 0 5.77 0.7
 -1 -20 0 8.12 0.64
 -1 -20 0 9.57 0.96
 -1 20 -1 13.44 1.34
 -1 20 -1 15.05 1.06
 1 20 1 12.19 1.36
 1 20 1 17.47 1.16
 1 -20 1 15.04 0.89
 1 -20 1 16.09 1.05
 -1 -20 -1 15.03 0.97
 -1 -20 -1 16.93 0.93
 -1 20 -2 7.09 1.01
 -1 20 -2 7.78 1.17
 1 20 2 8.58 1.05
 1 -20 2 5.4 1.14
 1 -20 2 6.08 1.17
 -1 -20 -2 8.28 1.04
 -1 20 -3 44.77 2.37
 -1 20 -3 54.41 1.91
 1 20 3 58.38 2.56
 1 20 3 51.63 2.39
 1 -20 3 54.99 2.18
 1 -20 3 57.05 2.31
 -1 -20 -3 58.93 2.11
 -1 20 -4 3.18 0.91
 -1 20 -4 1.12 0.77
 1 20 4 0.96 0.82
 1 -20 4 3.4 1.02
 1 -20 4 2.16 0.88
 -1 -20 -4 0.5 0.89
 -1 -20 -4 1.24 0.89
 -1 20 -5 21.53 1.52
 1 20 5 24.03 1.57
 1 20 5 25.1 1.46
 1 -20 5 20.6 1.37
 -1 -20 -5 20.49 1.39
 -1 -20 -5 19.1 1.9
 -2 0 19 9.69 0.97
 2 0 -19 10.68 1
 -2 0 18 14.32 0.99
 2 0 -18 13.12 0.9
 -2 0 17 12 0.81
 -2 0 17 10.19 0.65
 2 0 -17 10.63 0.7
 2 0 -17 14.96 0.9
 -2 0 16 6.45 0.61
 -2 0 16 5.05 0.51
 2 0 -16 5.99 0.61
 2 0 -16 5.26 0.66
 -2 0 15 90.88 3.2
 -2 0 15 97.98 3.49
 2 0 -15 99.17 3.51
 2 0 -15 94.11 3.4
 -2 0 14 65.26 2.57
 -2 0 14 73.48 2.6
 2 0 -14 74.56 2.79
 2 0 -14 69.86 2.58
 -2 0 13 49.28 1.81
 -2 0 13 51.5 1.92
 2 0 -13 56.15 2.2
 2 0 -13 46.21 2.22
 -2 0 12 61.98 2.55
 -2 0 12 62.63 2.33
 2 0 -12 68.94 2.6
 2 0 -12 64.6 2.57
 -2 0 11 428.03 13.68
 -2 0 11 428.81 14.12
 2 0 -11 443.09 14.49
 2 0 -11 455.82 14.26
 -2 0 10 109.84 3.72
 -2 0 10 113.27 3.71
 2 0 -10 105.8 3.76
 2 0 -10 106.87 3.67
 -2 0 9 201.67 6.43
 -2 0 9 208.13 6.97
 2 0 -9 203.88 6.67
 2 0 -9 202.73 6.78
 -2 0 8 11.58 0.74
 -2 0 8 12.98 0.92
 2 0 -8 12.88 0.82
 2 0 -8 10.53 0.77
 -2 0 7 2.41 0.43
 -2 0 7 3.28 0.61
 2 0 -7 2.13 0.53
 2 0 -7 1.9 0.35
 -2 0 6 49.48 2.47
 -2 0 6 54.45 2.96
 2 0 -6 52.78 2.75
 2 0 -6 51.19 2.88
 -2 0 4 164.46 5.3
 -2 0 4 187.06 5.8
 2 0 -4 169.35 5.57
 2 0 -4 162.75 5.28
 -2 0 3 624.45 19.46
 -2 0 3 624.37 19.98
 2 0 -3 652.71 19.96
 2 0 -3 622.62 19.73
 -2 0 2 801.14 28.55
 -2 0 2 935.21 28.25
 2 0 -2 913.28 28.4
 2 0 -2 979.57 28.37
 -2 0 1 4.48 0.53
 -2 0 1 3.2 0.56
 2 0 -1 2.41 0.5
 2 0 -1 2.18 0.56
 -2 0 0 1571.92 49.31
 2 0 0 1519.79 48.91
 2 0 0 1465.67 48.18
 -2 0 -1 98.01 3.35
 -2 0 -1 98.48 3.18
 2 0 1 99.98 3.26
 2 0 1 101.91 3.42
 -2 0 -2 90.1 4.54
 2 0 2 76.31 4.57
 -2 0 -3 474.4 14.45
 -2 0 -3 435.22 14.52
 2 0 3 447.39 14.34
 2 0 3 473.41 14.48
 -2 0 -4 4.92 0.32
 2 0 4 5.81 0.34
 2 0 4 7.75 0.81
 -2 0 -5 268.11 9.29
 -2 0 -5 265.97 9.08
 2 0 5 270.56 9.01
 2 0 5 249.07 9.39
 -2 0 -6 354.1 11.33
 -2 0 -6 353.32 10.98
 2 0 6 361.14 11.25
 2 0 6 342.08 11.16
 -2 0 -7 72.46 2.47
 -2 0 -7 69.77 2.41
 2 0 7 71.82 2.41
 2 0 7 68.77 2.38
 -2 0 -8 78.6 2.58
 -2 0 -8 72.1 2.41
 2 0 8 75.07 2.38
 2 0 8 75.38 2.53
 -2 0 -9 112.99 3.48
 -2 0 -9 96.42 3.3
 2 0 9 103.15 3.29
 2 0 9 102.39 3.37
 -2 0 -10 100.58 2.95
 -2 0 -10 86.4 2.9
 2 0 10 90.19 2.86
 2 0 10 90.03 2.88
 -2 1 18 8.89 0.77
 2 1 -18 12.68 0.85
 2 -1 -18 11.51 0.86
 -2 1 17 126.28 4.75
 2 1 -17 129.08 4.65
 2 1 -17 137.18 4.28
 2 -1 -17 125.99 5.02
 2 -1 -17 129.89 4.21
 -2 -1 17 136.66 4.97
 -2 -1 17 125.39 4.97
 -2 1 16 169.17 5.83
 -2 1 16 185.44 6.08
 2 1 -16 187.86 6.42
 2 1 -16 192.29 6.51
 2 -1 -16 177.15 5.91
 2 -1 -16 164.98 5.88
 -2 -1 16 183.04 5.82
 -2 -1 16 176.11 5.89
 -2 1 15 73.04 2.39
 -2 1 15 77.49 2.66
 2 1 -15 78.6 2.74
 2 1 -15 75.81 2.53
 2 -1 -15 71.35 2.52
 2 -1 -15 68.95 2.9
 -2 -1 15 78.12 3.05
 -2 -1 15 74.51 2.89
 -2 1 14 33.33 1.29
 -2 1 14 34.84 1.27
 2 1 -14 31.45 1.45
 2 1 -14 32.52 1.58
 2 -1 -14 33.69 1.46
 2 -1 -14 34.88 1.68
 -2 -1 14 35.82 1.31
 -2 -1 14 31.49 1.42
 -2 1 13 2.81 0.39
 -2 1 13 2.37 0.51
 2 1 -13 1.61 0.36
 2 1 -13 1.01 0.5
 2 -1 -13 2.82 0.55
 2 -1 -13 3.01 0.52
 -2 -1 13 1.47 0.36
 -2 -1 13 0.91 0.35
 -2 1 12 35.77 1.39
 -2 1 12 42.38 1.51
 2 1 -12 37.16 1.64
 2 1 -12 42.5 1.5
 2 -1 -12 39.25 1.44
 2 -1 -12 37.35 1.51
 -2 -1 12 38.83 1.49
 -2 -1 12 37.41 1.47
 -2 1 11 2.76 0.3
 -2 1 11 4.54 0.65
 2 1 -11 3.54 0.55
 2 1 -11 3.29 0.69
 2 -1 -11 2.94 0.46
 2 -1 -11 2.87 0.57
 -2 -1 11 3.12 0.3
 -2 -1 11 3.32 0.65
 -2 1 10 2.04 0.63
 -2 1 10 5.25 0.97
 2 1 -10 4.93 1.02
 2 1 -10 4.52 1.14
 2 -1 -10 1.96 0.43
 -2 -1 10 2.8 0.67
 -2 -1 10 4.8 1.08
 -2 1 9 94.83 3.69
 -2 1 9 105.07 3.67
 2 1 -9 95.07 3.42
 2 1 -9 99.54 3.65
 2 -1 -9 100.78 3.33
 2 -1 -9 90.85 3.52
 -2 -1 9 98 3.69
 -2 -1 9 99 3.55
 2 1 -8 69.28 2.5
 2 1 -8 70.81 2.64
 2 -1 -8 82.73 2.63
 -2 -1 8 72.03 2.62
 -2 -1 8 72.63 2.68
 -2 1 7 149.6 4.89
 -2 1 7 151.6 5.16
 2 1 -7 163.31 5.18
 2 1 -7 155.86 5.06
 2 -1 -7 147.86 5.18
 2 -1 -7 149.97 5.13
 -2 -1 7 153.95 4.92
 -2 -1 7 157.79 5.22
 -2 1 6 0.12 0.47
 -2 1 6 0.68 0.64
 2 1 -6 0.85 0.69
 2 -1 -6 2.46 0.72
 2 -1 -6 0.34 0.61
 -2 -1 6 0.43 0.55
 -2 -1 6 1.13 0.7
 -2 1 5 120.74 4.13
 -2 1 5 117.81 4.22
 2 1 -5 122.43 3.93
 2 1 -5 113.46 4.15
 2 1 -4 551.78 17.29
 2 1 -4 553.62 17.72
 2 -1 -4 557.99 16.93
 2 -1 -4 539.8 16.86
 -2 -1 4 536.83 17.29
 -2 -1 4 555.52 17.6
 -2 1 3 1149.76 39.55
 -2 1 3 1125.7 40.12
 2 1 -3 1235.43 39.85
 2 -1 -3 1231.46 40.53
 2 -1 -3 1362.13 40.38
 -2 -1 3 1219 39.08
 -2 -1 3 1314.09 39.77
 -2 1 2 1164.36 35.88
 -2 1 2 1090.7 36.55
 2 1 -2 1103.11 37.33
 2 -1 -2 1085.23 36.65
 2 -1 -2 1232.88 36.69
 -2 -1 2 1260.57 38.95
 -2 1 1 1.68 0.32
 -2 1 1 1.5 0.38
 2 1 -1 1.57 0.39
 2 1 -1 0.96 0.37
 2 -1 -1 3.39 0.5
 2 -1 -1 0.97 0.21
 -2 -1 1 1.52 0.45
 -2 -1 1 1.21 0.6
 -2 1 0 23.14 0.89
 -2 1 0 23.9 0.94
 2 1 0 24.17 0.91
 2 1 0 23.13 0.91
 2 -1 0 24.13 0.92
 2 -1 0 22.3 0.94
 -2 -1 0 23.72 0.84
 -2 -1 0 23.24 0.89
 -2 1 -1 56.62 1.92
 -2 1 -1 60.48 1.98
 2 1 1 56.15 1.86
 2 1 1 50.71 1.92
 2 -1 1 56.72 2.01
 2 -1 1 53.16 1.98
 -2 -1 -1 55.01 1.88
 -2 -1 -1 54.87 1.86
 2 1 2 430.22 14.47
 2 1 2 475.54 14.45
 2 -1 2 413.39 14.23
 -2 -1 -2 493.98 14.77
 -2 1 -3 648.9 19.87
 2 1 3 558.23 19.21
 2 1 3 689 19.68
 2 -1 3 620.35 19.44
 -2 -1 -3 560.41 18.91
 -2 1 -4 40.15 1.44
 2 1 4 40.25 1.34
 2 -1 4 36.37 1.28
 -2 -1 -4 39.69 1.4
 -2 1 -5 237.55 7.55
 -2 1 -5 235.29 7.45
 2 1 5 234.86 7.6
 2 1 5 242.75 7.53
 2 -1 5 244.84 7.6
 2 -1 5 244.7 7.88
 -2 -1 -5 248.23 7.67
 -2 -1 -5 233.48 7.78
 -2 1 -6 144.79 4.74
 -2 1 -6 148 4.69
 2 1 6 159.28 4.79
 2 1 6 143.94 4.74
 2 -1 6 138.84 4.56
 2 -1 6 148.32 4.79
 -2 -1 -6 147.92 4.8
 -2 -1 -6 146.78 4.59
 2 1 7 0.24 0.12
 2 1 7 0.95 0.43
 -2 -1 -7 2.39 0.47
 -2 -1 -7 0.34 0.15
 -2 1 -8 106.46 3.37
 -2 1 -8 98.47 3.13
 2 1 8 102.96 3.12
 2 1 8 89.86 3.09
 2 -1 8 105.5 3.21
 2 -1 8 100.19 3.27
 -2 -1 -8 99.49 3.2
 -2 -1 -8 88.53 3.08
 -2 1 -9 243.12 7.69
 -2 1 -9 247.75 7.64
 2 -1 9 249.15 7.59
 2 -1 9 233.02 7.71
 -2 1 -10 234.53 7.44
 2 -1 10 225.16 7.52
 2 -1 10 251.35 7.36
 -2 1 -11 102.49 3.16
 -2 1 -11 99.64 3.23
 2 -1 11 95.27 3.27
 2 -1 11 97.61 3.2
 -2 1 -12 -0.1 0.17
 -2 1 -12 0.12 0.21
 2 -1 12 0.05 0.19
 -2 1 -13 16.04 0.65
 -2 1 -13 13.3 0.59
 2 2 -19 1.97 0.69
 -2 -2 19 2.99 0.82
 -2 2 18 9.57 0.71
 2 2 -18 8.32 0.74
 2 -2 -18 8.55 0.81
 -2 -2 18 8.55 0.89
 -2 2 17 3.71 0.42
 -2 2 17 3.51 0.43
 2 -2 -17 3.88 0.6
 -2 -2 17 3.57 0.57
 2 2 -16 -0.55 0.53
 2 -2 -16 0.82 0.46
 2 -2 -16 2.44 0.55
 -2 -2 16 0.04 0.61
 -2 2 15 7.78 0.44
 -2 2 15 8.04 0.52
 2 2 -15 6.15 0.57
 2 2 -15 10.16 0.89
 2 -2 -15 9.37 0.69
 -2 -2 15 7.95 0.53
 -2 2 14 69.83 2.45
 -2 2 14 73.9 2.67
 2 2 -14 82.05 2.75
 2 -2 -14 73.23 2.65
 2 -2 -14 73.45 2.92
 -2 2 13 60.18 2.15
 -2 2 13 63.97 2.19
 2 2 -13 61.81 2.39
 2 2 -13 65.28 2.37
 2 -2 -13 59.7 2.19
 2 -2 -13 63.28 2.63
 -2 -2 13 66.42 2.38
 -2 -2 13 66.43 2.42
 -2 2 12 2.94 0.29
 -2 2 12 3.02 0.4
 2 2 -12 3.62 0.48
 2 2 -12 2.82 0.42
 2 -2 -12 2.6 0.41
 2 -2 -12 2.94 0.44
 -2 -2 12 3.31 0.42
 -2 -2 12 4.18 0.55
 -2 2 11 1.44 0.61
 -2 2 11 0.87 0.77
 2 2 -11 0.02 0.66
 2 2 -11 0.8 0.53
 2 -2 -11 1.31 0.79
 2 -2 -11 2.66 0.9
 -2 -2 11 -0.03 0.53
 -2 -2 11 -0.8 0.64
 -2 2 10 21.05 0.81
 -2 2 10 21.68 0.94
 2 2 -10 20.34 1.11
 2 2 -10 20.67 0.91
 2 -2 -10 21.52 0.93
 2 -2 -10 21.2 0.97
 -2 -2 10 19.21 0.79
 -2 -2 10 23.22 1.16
 -2 2 9 0.61 0.34
 -2 2 9 0.75 0.46
 2 -2 -9 0.73 0.47
 2 -2 -9 0.83 0.4
 -2 2 8 38.42 1.39
 -2 2 8 40.59 1.65
 2 2 -8 38.08 1.47
 2 2 -8 39.17 1.45
 2 -2 -8 41.22 1.51
 2 -2 -8 39.24 1.5
 -2 -2 8 38.64 1.39
 -2 -2 8 42.22 1.6
 -2 2 7 7.86 0.55
 -2 2 7 6.91 0.69
 2 2 -7 7.74 0.71
 2 2 -7 7.94 0.7
 2 -2 -7 8.19 0.72
 2 -2 -7 7.41 0.42
 -2 -2 7 7.82 0.6
 -2 -2 7 7.81 0.86
 2 -2 -6 7.38 0.59
 -2 -2 6 8.22 0.74
 -2 -2 6 10.11 0.86
 -2 2 5 13.68 0.66
 -2 2 5 12.08 0.66
 2 2 -5 11.13 0.61
 2 2 -5 11.86 0.73
 2 -2 -5 12.95 0.75
 2 2 -4 353.33 11.32
 2 2 -4 346.56 11.65
 2 -2 -4 372.31 11.48
 2 -2 -4 334.83 11.19
 -2 -2 4 364.7 11.5
 -2 -2 4 353.49 11.52
 -2 2 3 73.83 2.48
 -2 2 3 76.59 2.64
 2 2 -3 89.35 3.03
 2 2 -3 76.29 2.65
 2 -2 -3 78.24 2.6
 2 -2 -3 69.99 2.51
 -2 -2 3 78.15 2.65
 -2 -2 3 77.05 2.64
 -2 2 2 64.36 2.54
 2 2 -2 82.15 2.67
 2 2 -2 66.96 2.69
 2 -2 -2 68.03 2.6
 -2 -2 2 73.21 2.67
 -2 -2 2 71.93 2.79
 2 2 -1 517.49 15.48
 2 2 -1 477.51 15.64
 -2 -2 1 496.82 15.42
 -2 -2 1 476.84 15.6
 -2 2 0 0.23 0.2
 -2 2 0 0.22 0.32
 2 2 0 -0.25 0.45
 2 2 0 -0.06 0.46
 2 -2 0 0.16 0.17
 -2 -2 0 -0.03 0.2
 -2 -2 0 -0.05 0.53
 -2 2 -1 760.51 26.44
 2 2 1 844.17 27.09
 2 2 1 890.22 25.94
 2 -2 1 831.6 25.98
 2 -2 1 846.79 26.26
 -2 -2 -1 862.14 26.64
 -2 -2 -1 854.47 26.44
 -2 2 -2 214.41 7.06
 -2 2 -2 200.12 7.11
 2 2 2 217.13 7.03
 2 2 2 241.27 7.23
 2 -2 2 225.44 7.21
 2 -2 2 217.34 7.08
 -2 -2 -2 240.79 7.25
 -2 -2 -2 206.19 7.02
 -2 2 -3 4.98 0.3
 2 2 3 6.25 0.35
 2 2 3 7.54 0.59
 2 -2 3 5.6 0.32
 2 -2 3 7.17 0.59
 -2 -2 -3 6 0.41
 -2 2 -4 121.74 4.47
 2 2 4 120.68 4.22
 2 -2 4 125.86 4.57
 2 -2 4 139.63 4.7
 -2 -2 -4 123.03 4.21
 -2 2 -5 34.86 1.22
 -2 2 -5 33.27 1.14
 2 2 5 31.86 1.14
 2 2 5 32.18 1.25
 2 -2 5 33.56 1.18
 2 -2 5 32.44 1.16
 -2 -2 -5 34.42 1.23
 -2 -2 -5 34.18 1.18
 -2 2 -6 72.29 2.45
 -2 2 -6 74.34 2.38
 2 2 6 78.16 2.57
 2 2 6 74.01 2.45
 2 -2 6 75.78 2.45
 2 -2 6 72.21 2.36
 -2 -2 -6 76.52 2.56
 -2 -2 -6 74.51 2.44
 -2 2 -7 83.81 2.96
 -2 2 -7 79.8 2.62
 2 2 7 83.9 2.54
 2 2 7 77.93 2.54
 2 -2 7 77.43 2.68
 2 -2 7 79.8 2.73
 -2 -2 -7 80.5 2.59
 -2 -2 -7 77.71 2.54
 -2 2 -8 3.59 0.22
 2 -2 8 3.44 0.22
 2 -2 8 4.07 0.44
 -2 2 -9 91.41 3.4
 -2 2 -9 90.35 3.19
 2 -2 9 95.26 3.42
 2 -2 9 86.4 3.5
 -2 2 -10 23.99 1.01
 -2 2 -10 21.74 0.93
 2 -2 10 24.97 1.09
 2 -2 10 23.85 0.94
 -2 2 -11 176.7 5.63
 2 -2 11 170.53 5.87
 2 -2 11 178.58 5.79
 -2 2 -12 16.3 0.73
 -2 2 -12 13.97 0.67
 2 -2 12 13.47 0.7
 2 -2 12 15.86 0.64
 -2 2 -13 0.72 0.34
 -2 2 -13 0.97 0.34
 2 -2 13 0.55 0.41
 -2 2 -14 12.34 0.68
 2 -2 14 11.46 0.77
 -2 3 18 5.39 0.46
 2 3 -18 4.4 0.49
 2 -3 -18 2.34 0.78
 -2 -3 18 4.96 0.61
 -2 3 17 13.31 0.71
 -2 -3 17 15.64 0.79
 -2 3 16 3.32 0.36
 2 3 -16 4.82 0.59
 2 3 -16 3.78 0.5
 -2 -3 16 4.06 0.4
 -2 -3 16 4.58 0.71
 -2 3 15 17.12 0.89
 -2 3 15 18.14 0.86
 2 3 -15 18.88 1.01
 2 3 -15 18.43 1.27
 2 -3 -15 20.55 0.96
 -2 -3 15 21.76 1.1
 -2 -3 15 19.48 1.15
 -2 3 14 42.59 1.66
 -2 3 14 44.77 1.51
 2 3 -14 38.42 1.82
 2 3 -14 38.84 1.89
 2 -3 -14 46.95 1.78
 -2 -3 14 38.23 1.52
 -2 -3 14 40.78 1.73
 -2 3 13 0.55 0.24
 -2 3 13 0.56 0.34
 2 3 -13 -0.01 0.45
 2 3 -13 1.04 0.45
 2 -3 -13 0.51 0.3
 -2 -3 13 0.44 0.32
 -2 -3 13 0.44 0.48
 -2 3 12 234.29 7.61
 -2 3 12 231.34 7.29
 2 3 -12 236.43 7.85
 2 3 -12 232.55 8.07
 2 -3 -12 225.49 7.31
 2 -3 -12 231.57 7.44
 -2 -3 12 235.17 7.79
 -2 -3 12 244.23 8.08
 -2 3 11 303.83 10.26
 -2 3 11 316.65 10.37
 2 3 -11 375.52 11.31
 2 3 -11 374.63 11.38
 2 -3 -11 308 10.46
 2 -3 -11 315.13 10.58
 -2 -3 11 361.2 10.97
 -2 3 10 19.7 0.85
 -2 3 10 20.36 1.24
 2 3 -10 18.59 1.08
 2 3 -10 18.44 0.97
 2 -3 -10 19.65 1.12
 2 -3 -10 19.55 1.05
 -2 -3 10 19.15 0.97
 -2 -3 10 17.53 1.11
 -2 3 9 22.16 0.81
 -2 3 9 21.34 1.01
 2 3 -9 18.06 0.94
 2 3 -9 19.34 0.96
 2 -3 -9 20.3 0.95
 2 -3 -9 22.87 1.03
 -2 -3 9 17.38 0.88
 -2 -3 9 16.92 0.95
 -2 3 8 7.8 0.41
 -2 3 8 8.4 0.47
 2 3 -8 7.36 0.49
 2 3 -8 7.93 0.46
 2 -3 -8 7.49 0.47
 2 -3 -8 8.28 0.51
 -2 -3 8 7.46 0.37
 -2 -3 8 7.21 0.43
 -2 3 7 120.47 3.95
 -2 3 7 125.66 4.04
 2 3 -7 119.36 3.96
 2 3 -7 124.47 4.38
 2 -3 -7 118.77 4.16
 2 -3 -7 124.82 4.19
 -2 -3 7 119.88 4.13
 -2 -3 7 118.75 4.08
 -2 3 6 33.29 1.45
 -2 3 6 30.08 1.56
 2 3 -6 25.31 1.34
 2 -3 -6 31.41 1.55
 2 -3 -6 23.87 1.36
 -2 3 5 101.3 3.55
 -2 3 5 119.91 4.05
 2 3 -5 113.24 4.03
 2 3 -5 106.78 4.04
 2 -3 -5 123.61 3.92
 2 -3 -5 95.25 3.6
 -2 -3 5 112.19 3.97
 -2 -3 5 114.58 4.13
 -2 3 4 317.81 9.97
 2 3 -4 327.8 10.35
 2 3 -4 321.55 10.33
 -2 -3 4 319.32 10.13
 -2 -3 4 316.97 10.2
 -2 3 3 182.91 6.5
 2 3 -3 190.36 6.33
 2 3 -3 187.93 6.04
 2 -3 -3 192.02 6.21
 2 -3 -3 179.56 6.46
 -2 -3 3 186.09 6.01
 -2 -3 3 190.77 5.96
 -2 3 2 1.08 0.45
 -2 3 2 0.99 0.45
 2 3 -2 0.21 0.43
 2 -3 -2 0.53 0.3
 2 -3 -2 1.67 0.72
 -2 -3 2 0.91 0.34
 2 3 -1 657.75 20.49
 2 3 -1 577.07 20.22
 -2 -3 1 646.57 20.76
 -2 -3 1 636.4 20.67
 -2 3 0 369.51 11.83
 -2 3 0 349.37 11.44
 2 3 0 377.12 11.93
 2 3 0 372.7 11.86
 2 -3 0 362.21 11.51
 2 -3 0 370.68 11.83
 -2 -3 0 394.65 11.95
 -2 -3 0 388.83 12.07
 2 3 1 394.73 12.38
 2 3 1 375.92 12.03
 -2 -3 -1 386.11 12.02
 -2 -3 -1 368.26 11.68
 -2 3 -2 52.88 1.75
 -2 3 -2 51.17 1.76
 2 3 2 56.16 1.91
 2 3 2 56.62 1.88
 2 -3 2 56.76 1.97
 2 -3 2 57.24 1.88
 -2 -3 -2 54.24 1.89
 -2 -3 -2 56.37 1.91
 -2 3 -3 0.49 0.53
 -2 3 -3 0.32 0.24
 2 3 3 0.32 0.14
 2 -3 3 1.18 0.52
 2 -3 3 1.28 0.69
 -2 -3 -3 0.31 0.18
 -2 3 -4 0.09 0.2
 2 3 4 0.32 0.38
 2 -3 4 0.31 0.17
 2 -3 4 2.05 0.68
 -2 -3 -4 0.43 0.48
 -2 3 -5 245.59 7.91
 -2 3 -5 228.83 7.4
 2 3 5 239.26 7.53
 2 3 5 232.19 7.51
 2 -3 5 242.1 7.38
 2 -3 5 251.4 7.67
 -2 -3 -5 223.93 7.41
 -2 -3 -5 232 7.45
 -2 3 -6 201.15 6.12
 -2 3 -6 191.3 5.95
 2 3 6 169.84 5.69
 2 3 6 165.06 5.76
 2 -3 6 197.59 6.09
 2 -3 6 201.32 6.21
 -2 -3 -6 163.76 5.7
 -2 -3 -6 159.37 5.6
 -2 3 -7 7.72 0.89
 -2 3 -7 4.04 0.37
 2 3 7 4.44 0.19
 2 -3 7 4.17 0.28
 2 -3 7 3.82 0.51
 -2 -3 -7 4.75 0.2
 -2 3 -8 5.71 0.38
 -2 3 -8 5.09 0.27
 2 -3 8 5.04 0.27
 2 -3 8 3.82 0.35
 -2 3 -9 53.45 1.98
 -2 3 -9 49.95 1.78
 2 -3 9 55.33 1.88
 2 -3 9 54.45 1.95
 -2 3 -10 127.43 4.09
 -2 3 -10 125.59 4.13
 2 -3 10 124.73 4.06
 2 -3 10 125.77 4.44
 -2 3 -11 282.69 9.37
 2 -3 11 295.61 9.66
 2 -3 11 277.06 9.41
 -2 3 -12 31.22 1.25
 -2 3 -12 26.49 1.32
 2 -3 12 26.44 1.36
 2 -3 12 25.62 1.09
 -2 3 -13 14.9 0.71
 -2 3 -13 9.55 0.81
 2 -3 13 14.52 0.83
 2 -3 13 11.31 0.74
 -2 3 -14 38.36 1.6
 -2 3 -14 42.76 1.83
 2 -3 14 39.39 1.59
 2 -3 14 40.64 1.77
 -2 3 -16 1.59 0.62
 2 -3 16 1.48 0.71
 2 4 -19 0.22 0.72
 -2 -4 18 24.32 1.17
 2 4 -17 7.33 0.64
 -2 -4 17 8.55 0.55
 -2 4 16 61.48 2.01
 -2 4 16 61.4 2.21
 2 4 -16 53.76 2.44
 2 4 -16 56.19 2.2
 2 -4 -16 58.43 2.26
 -2 -4 16 66.39 2.01
 -2 -4 16 66.63 2.32
 -2 4 15 11.53 0.69
 -2 4 15 12.32 0.64
 2 4 -15 11.21 0.71
 2 4 -15 11.65 0.7
 2 -4 -15 13.48 0.86
 -2 -4 15 11.4 0.63
 -2 -4 15 11.54 0.74
 -2 4 14 10.48 0.53
 -2 4 14 9.95 0.57
 2 4 -14 9.21 0.61
 2 4 -14 11.37 0.75
 2 -4 -14 8.19 0.51
 2 -4 -14 10.92 0.71
 -2 -4 14 9.75 0.62
 -2 -4 14 8.03 0.69
 -2 4 13 5.46 0.49
 -2 4 13 5.25 0.41
 2 4 -13 4.05 0.45
 2 4 -13 4.56 0.52
 2 -4 -13 4.08 0.4
 2 -4 -13 5.4 0.58
 -2 -4 13 4.99 0.49
 -2 -4 13 4.25 0.45
 -2 4 12 22.34 0.81
 -2 4 12 19.92 0.91
 2 4 -12 14.62 0.86
 2 4 -12 16.72 0.94
 2 -4 -12 18.58 0.95
 2 -4 -12 21.16 0.93
 -2 -4 12 17.85 0.89
 -2 -4 12 17.13 0.94
 -2 4 11 144.54 4.65
 -2 4 11 145.05 4.67
 2 4 -11 141.84 4.76
 2 4 -11 141.19 4.73
 2 -4 -11 141.66 4.78
 2 -4 -11 147.23 4.99
 -2 -4 11 140.42 4.76
 -2 -4 11 144.04 4.76
 -2 4 10 24.28 0.94
 -2 4 10 23.57 0.89
 2 4 -10 22.04 0.96
 2 4 -10 25.47 1.07
 2 -4 -10 22.54 0.92
 2 -4 -10 23.12 1
 -2 -4 10 25.11 1.06
 -2 -4 10 23.18 1
 -2 4 9 54.84 1.97
 -2 4 9 58.67 2.3
 2 4 -9 56.27 2.3
 2 4 -9 60.51 2.53
 2 -4 -9 55.36 2.33
 2 -4 -9 55.3 2.35
 -2 -4 9 59.94 2.27
 -2 -4 9 57.16 2.42
 -2 4 8 14.67 1.48
 2 4 -8 14.58 0.84
 2 4 -8 13.31 0.9
 2 -4 -8 13.85 1.5
 -2 -4 8 13.65 0.78
 -2 -4 8 12.89 0.81
 -2 4 7 23.53 0.91
 -2 4 7 23.52 0.92
 2 -4 -7 22.14 0.95
 2 -4 -7 23.86 1.02
 -2 -4 7 20.51 0.94
 -2 -4 7 23.47 1.04
 -2 4 6 59.82 1.95
 -2 4 6 58.44 2.01
 2 4 -6 66.41 2.55
 2 4 -6 56.29 2.12
 2 -4 -6 62.27 2.18
 2 -4 -6 60.05 2.11
 -2 4 5 110.46 3.67
 -2 4 5 115.26 3.74
 2 4 -5 122.13 4.16
 2 4 -5 110.43 3.91
 2 -4 -5 118.66 3.9
 2 -4 -5 113.17 3.9
 -2 -4 5 115.68 3.9
 -2 -4 5 119.68 3.99
 -2 4 4 8.29 0.47
 -2 4 4 8.86 0.52
 2 4 -4 9.89 0.52
 2 4 -4 8.02 0.43
 -2 -4 4 8.07 0.4
 -2 -4 4 9.15 0.49
 2 4 -3 337.51 10.63
 2 4 -3 314.97 10.9
 2 -4 -3 339.32 11.47
 -2 -4 3 314.81 10.92
 -2 -4 3 327.77 10.45
 -2 4 2 132.02 4.21
 -2 4 2 127.94 3.99
 2 4 -2 124.89 4.4
 2 4 -2 120.33 4.06
 2 -4 -2 123.45 3.97
 2 -4 -2 123.68 4.04
 -2 -4 2 119.49 4.02
 -2 -4 2 119.17 4.32
 -2 4 1 0.97 0.28
 -2 4 1 0.21 0.29
 2 4 -1 0.45 0.31
 2 4 -1 0.23 0.28
 2 -4 -1 0.43 0.27
 2 -4 -1 0.44 0.31
 -2 -4 1 0.27 0.14
 -2 -4 1 0.77 0.38
 -2 4 0 55.62 2.02
 -2 4 0 57.45 2.17
 2 4 0 61.61 2.08
 2 4 0 59.01 1.92
 2 -4 0 58.34 2.2
 2 -4 0 56 1.94
 -2 -4 0 59.81 2.02
 -2 -4 0 55.84 1.96
 -2 4 -1 -0.27 0.2
 -2 4 -1 -0.44 0.25
 2 4 1 0.43 0.23
 2 4 1 -0.12 0.23
 2 -4 1 0.09 0.22
 2 -4 1 -0.16 0.24
 -2 -4 -1 -0.22 0.19
 -2 -4 -1 -0.08 0.3
 -2 4 -2 31.4 1.24
 -2 4 -2 29.64 1.31
 2 4 2 37.57 1.5
 2 -4 2 28.97 1.18
 2 -4 2 29.74 1.27
 -2 4 -3 820.92 28.43
 -2 4 -3 894.04 27.29
 2 4 3 799.77 27.99
 2 -4 3 921.89 27.43
 2 -4 3 948.78 27.71
 -2 -4 -3 802.45 28.22
 -2 -4 -3 961.5 27.48
 -2 4 -4 13.74 0.61
 -2 4 -4 12.17 0.53
 2 4 4 13.33 0.53
 2 4 4 12.07 0.58
 2 -4 4 12.73 0.57
 2 -4 4 14.13 0.64
 -2 -4 -4 12.99 0.51
 -2 -4 -4 11.31 0.52
 -2 4 -5 20.47 0.77
 2 4 5 20.66 0.71
 2 4 5 20.24 0.74
 2 -4 5 21.73 0.83
 2 -4 5 22.4 1.09
 -2 -4 -5 18.84 0.7
 -2 -4 -5 21.47 0.81
 -2 4 -6 6.26 0.6
 -2 4 -6 7.32 0.47
 2 4 6 5.96 0.28
 2 -4 6 6.61 0.38
 2 -4 6 7.32 0.57
 -2 -4 -6 6.17 0.31
 -2 -4 -6 5.42 0.29
 -2 4 -7 31.83 1.13
 -2 4 -7 28.33 1.04
 2 -4 7 32.48 1.13
 2 -4 7 30.55 1.15
 -2 -4 -7 28.49 0.93
 -2 -4 -7 27.43 0.92
 -2 4 -8 44.07 1.67
 -2 4 -8 41.43 1.51
 2 -4 8 40.21 1.52
 2 -4 8 38.81 1.49
 -2 4 -9 154.8 5.29
 -2 4 -9 152.63 5.13
 2 -4 9 153.88 5.04
 2 -4 9 170.78 5.46
 -2 4 -10 5.35 0.38
 -2 4 -10 5.58 0.38
 2 -4 10 4.35 0.32
 2 -4 10 5.7 0.49
 -2 4 -11 84.46 2.76
 -2 4 -11 78.11 2.85
 2 -4 11 81.64 3
 2 -4 11 84.79 2.98
 -2 4 -12 0.29 0.26
 -2 4 -12 -0.22 0.35
 2 -4 12 0.26 0.45
 2 -4 12 0.32 0.25
 -2 4 -13 5.87 0.53
 -2 4 -13 6.13 0.49
 2 -4 13 5.49 0.73
 2 -4 13 5.6 0.58
 -2 4 -14 12.05 0.69
 -2 4 -15 3.46 0.57
 -2 4 -15 5.19 0.53
 2 -4 15 4.7 0.78
 -2 4 -16 28.73 1.82
 -2 4 -18 70.75 2.48
 -2 4 -18 60.17 2.44
 2 -4 18 61.44 2.48
 2 5 -18 3.66 0.61
 2 5 -18 4.64 0.77
 -2 -5 18 6.32 0.62
 -2 -5 18 4.82 0.59
 -2 5 17 2.1 0.42
 -2 5 17 2.42 0.38
 2 5 -17 2.66 0.65
 2 5 -17 3.22 0.61
 2 -5 -17 2.88 0.67
 -2 -5 17 3.64 0.49
 -2 -5 17 3.61 0.52
 -2 5 16 33.4 1.24
 -2 5 16 25.97 1.27
 2 5 -16 32.61 1.48
 2 5 -16 28.7 1.35
 2 -5 -16 25.47 1.26
 2 -5 -16 27.94 1.76
 -2 -5 16 29.27 1.34
 -2 -5 16 26.68 1.65
 -2 5 15 26.43 1.42
 -2 5 15 28.26 1.31
 2 5 -15 32.52 1.33
 2 5 -15 29.81 1.23
 2 -5 -15 26.9 1.32
 2 -5 -15 32.04 1.27
 -2 -5 15 33.41 1.14
 -2 -5 15 26.55 1.54
 -2 5 14 4.51 0.53
 -2 5 14 4 0.39
 2 5 -14 2.84 0.46
 2 5 -14 2.91 0.43
 2 -5 -14 3.41 0.43
 2 -5 -14 4.72 0.58
 -2 -5 14 3.4 0.44
 -2 -5 14 3.95 0.63
 -2 5 13 46.3 1.62
 -2 5 13 51.08 1.88
 2 5 -13 48 1.96
 2 5 -13 46.59 2.17
 2 -5 -13 47.79 1.87
 2 -5 -13 48.53 1.88
 -2 -5 13 47.66 1.85
 -2 -5 13 45.95 1.7
 -2 5 12 121.62 4.05
 -2 5 12 122.04 4.2
 2 5 -12 117.29 4
 2 5 -12 122.92 4.22
 2 -5 -12 116.5 4.16
 2 -5 -12 120.4 4.32
 -2 -5 12 114.21 3.96
 -2 -5 12 114.26 4.24
 -2 5 11 127.21 4.27
 -2 5 11 140.06 4.89
 2 5 -11 120.46 4.39
 2 5 -11 119.46 4.54
 2 -5 -11 130.41 4.44
 2 -5 -11 133.27 4.64
 -2 -5 11 124.15 4.3
 -2 -5 11 126.29 4.3
 -2 5 10 106.39 3.72
 -2 5 10 104.73 3.75
 2 5 -10 117.17 4.08
 2 5 -10 113.6 4.05
 2 -5 -10 107.61 4.03
 2 -5 -10 103.53 3.56
 -2 -5 10 113.11 4.02
 -2 -5 10 112.14 3.83
 -2 5 9 490.35 15.56
 -2 5 9 500.69 15.39
 2 5 -9 452.58 15.01
 2 5 -9 452.78 14.94
 2 -5 -9 475.06 14.95
 2 -5 -9 459.64 15.14
 -2 -5 9 459.43 15
 -2 -5 9 480.93 15.19
 -2 5 8 1.06 0.32
 -2 5 8 1.14 0.35
 2 5 -8 1.94 0.37
 2 5 -8 1.7 0.29
 2 -5 -8 1.61 0.36
 2 -5 -8 1.36 0.39
 -2 -5 8 1.88 0.29
 -2 -5 8 1.24 0.39
 -2 5 7 2.52 0.35
 -2 5 7 2.99 0.46
 2 -5 -7 3.95 0.45
 2 -5 -7 2.69 0.29
 -2 -5 7 1.74 0.35
 -2 -5 7 2.58 0.39
 -2 5 6 120.24 4.13
 -2 5 6 129.52 4.1
 2 5 -6 126.39 4.53
 2 5 -6 125.52 4.34
 2 -5 -6 133.86 4.21
 2 -5 -6 121.93 4.18
 -2 -5 6 124.91 4.35
 -2 5 5 24.16 1.33
 2 5 -5 30.34 2.05
 2 5 -5 24.81 1.83
 2 -5 -5 26.75 1.58
 2 -5 -5 27.72 1.49
 -2 -5 5 29.73 1.88
 -2 -5 5 25.85 2.08
 -2 5 4 2.59 0.34
 -2 5 4 3.31 0.46
 2 5 -4 10.44 1.62
 2 -5 -4 4.52 0.49
 2 -5 -4 2.34 0.36
 -2 -5 4 10.87 1.67
 2 5 -3 39.78 2.36
 2 5 -3 40.69 2.7
 -2 -5 3 40.87 2.42
 -2 -5 3 38.33 2.56
 -2 5 2 461.45 15.03
 -2 5 2 470.12 15.45
 2 5 -2 470.3 15.16
 2 5 -2 467.52 15.46
 2 -5 -2 476.52 15.11
 2 -5 -2 459.47 15.41
 -2 -5 2 487.32 15.38
 -2 -5 2 479.24 15.2
 -2 5 1 127.75 4.57
 2 5 -1 146.67 4.75
 2 5 -1 148.98 4.9
 2 -5 -1 127.7 4.43
 -2 -5 1 148.18 4.77
 -2 -5 1 147 4.84
 -2 5 0 104.91 3.59
 -2 5 0 108.68 3.75
 2 5 0 124.72 4.46
 2 -5 0 108.21 3.79
 2 -5 0 106.54 3.82
 -2 -5 0 131.4 4.68
 2 5 1 238.35 8
 2 5 1 240.91 8.15
 -2 -5 -1 235.61 8
 -2 -5 -1 238.5 8.51
 -2 5 -2 70.09 3.19
 -2 5 -2 70.44 3.3
 2 5 2 77.31 3.11
 2 -5 2 82.7 3.5
 2 -5 2 66.41 3.22
 -2 -5 -2 82.25 2.83
 -2 -5 -2 84.78 3.09
 -2 5 -3 424.64 13.9
 -2 5 -3 424.59 13.47
 2 5 3 422.33 13.96
 2 5 3 447.4 13.5
 2 -5 3 426.54 13.46
 2 -5 3 425.6 14
 -2 -5 -3 476.14 13.39
 -2 -5 -3 425.45 13.47
 -2 5 -4 40.52 1.39
 -2 5 -4 39.23 1.32
 2 5 4 38.16 1.37
 2 5 4 38.28 1.35
 2 -5 4 39.2 1.32
 2 -5 4 37.32 1.27
 -2 -5 -4 36.9 1.24
 -2 -5 -4 35.43 1.39
 -2 5 -5 153.28 5.56
 -2 5 -5 161.25 5.23
 2 5 5 173.84 5.23
 2 -5 5 160.77 5.33
 2 -5 5 163.35 5.35
 -2 -5 -5 162.23 5.43
 -2 -5 -5 156.48 5.21
 -2 5 -6 7.49 0.39
 2 5 6 8.26 0.39
 2 5 6 8.88 0.32
 2 -5 6 9.05 0.6
 2 -5 6 11.56 0.89
 -2 -5 -6 8.52 0.37
 -2 -5 -6 7.52 0.37
 -2 5 -7 38.32 1.35
 -2 5 -7 40.56 1.47
 2 5 7 38.88 1.2
 2 -5 7 40.44 1.43
 2 -5 7 39.82 1.66
 -2 -5 -7 36.75 1.23
 -2 -5 -7 33.05 1.2
 -2 5 -8 0.94 0.27
 -2 5 -8 1.1 0.23
 2 -5 8 0.87 0.21
 2 -5 8 0.52 0.39
 -2 5 -9 456.81 14.05
 -2 5 -9 424.17 13.83
 2 -5 9 448.46 13.9
 2 -5 9 441.02 13.95
 -2 5 -10 2.52 0.61
 -2 5 -10 1.49 0.5
 2 -5 10 1.33 0.41
 2 -5 10 2.8 0.67
 -2 5 -11 20.82 1.03
 -2 5 -11 20.96 0.89
 2 -5 11 17.77 1.03
 2 -5 11 17.51 0.77
 -2 5 -12 2.69 0.44
 -2 5 -12 2.58 0.38
 2 -5 12 3.05 0.48
 2 -5 12 3.39 0.3
 -2 5 -13 1.94 0.39
 -2 5 -13 2.62 0.47
 2 -5 13 1.55 0.47
 2 -5 13 1.49 0.48
 -2 5 -14 52.36 2.05
 -2 5 -14 49 2.05
 2 -5 14 50.37 1.94
 2 -5 14 47.11 1.78
 -2 5 -15 30.54 1.42
 -2 5 -15 28.42 1.47
 2 -5 15 26.04 1.47
 2 -5 15 26.57 1.35
 -2 5 -16 80.2 2.77
 -2 5 -16 74.08 2.87
 -2 5 -17 3.22 0.87
 -2 6 18 14.82 0.86
 2 6 -18 11.18 1.18
 2 -6 -18 11.63 0.82
 -2 -6 18 9.13 1.03
 -2 6 17 112.86 3.52
 -2 6 17 100.25 3.76
 2 6 -17 116.55 3.65
 2 6 -17 116.55 3.94
 2 -6 -17 102.12 3.71
 2 -6 -17 103.32 3.96
 -2 -6 17 103.08 3.94
 -2 -6 17 93.05 3.95
 -2 6 16 53.74 2.29
 -2 6 16 61.48 2.15
 2 6 -16 64.09 2.21
 2 6 -16 58.69 2.7
 2 -6 -16 58.89 2.27
 2 -6 -16 62.05 2.32
 -2 -6 16 57.24 2.32
 -2 6 15 131.13 4.29
 -2 6 15 136.41 4.55
 2 6 -15 123.83 4.79
 2 6 -15 135.98 4.49
 2 -6 -15 131.24 4.51
 2 -6 -15 137.15 4.84
 -2 -6 15 129.48 4.51
 -2 -6 15 132.61 4.65
 -2 6 14 221.17 7.35
 -2 6 14 215.46 6.92
 2 6 -14 220.58 7.65
 2 6 -14 218.69 7.55
 2 -6 -14 209.4 7.18
 2 -6 -14 223.42 6.89
 -2 -6 14 213.73 7.42
 -2 -6 14 222.96 7.01
 -2 6 13 3.59 0.41
 -2 6 13 2.3 0.46
 2 6 -13 2.11 0.51
 2 6 -13 2.09 0.38
 2 -6 -13 3.05 0.45
 2 -6 -13 2.69 0.58
 -2 -6 13 2.84 0.5
 -2 -6 13 2.01 0.49
 -2 6 12 -0.3 0.38
 -2 6 12 -0.01 0.29
 2 6 -12 0.08 0.43
 2 6 -12 0.09 0.45
 2 -6 -12 0.07 0.34
 2 -6 -12 -0.42 0.44
 -2 -6 12 0.23 0.26
 -2 -6 12 -0.02 0.43
 -2 6 11 191.84 6.14
 -2 6 11 189.31 6.09
 2 6 -11 186.29 6.38
 2 6 -11 192.56 6.65
 2 -6 -11 188.28 6.2
 2 -6 -11 189.17 6.3
 -2 -6 11 178.34 6.41
 -2 -6 11 193.4 6.53
 -2 6 10 1.26 0.78
 2 6 -10 2.5 1.49
 2 6 -10 7.34 1.53
 2 -6 -10 2.22 1.06
 2 -6 -10 1.96 0.51
 -2 -6 10 1.25 0.89
 -2 -6 10 1 1.31
 -2 6 9 366.33 11.86
 -2 6 9 366.62 11.74
 2 6 -9 354.86 12.11
 2 6 -9 374.04 12.01
 2 -6 -9 354.5 11.59
 2 -6 -9 377.86 12.08
 -2 -6 9 360.07 11.89
 -2 -6 9 358.1 12.34
 -2 6 8 34.3 1.31
 -2 6 8 41.72 1.51
 2 6 -8 40.79 1.58
 2 6 -8 33.85 1.56
 2 -6 -8 36.79 1.48
 2 -6 -8 38.25 1.46
 -2 -6 8 31.8 1.38
 -2 -6 8 36.28 1.62
 -2 6 7 31.66 1.6
 -2 6 7 40.16 2.11
 2 6 -7 41.3 1.87
 2 6 -7 31.3 2
 2 -6 -7 36.1 1.87
 2 -6 -7 28.98 1.81
 -2 6 6 70.22 2.39
 -2 6 6 73.9 2.62
 2 6 -6 72.34 2.64
 2 6 -6 76.98 2.87
 2 -6 -6 73.89 2.62
 2 -6 -6 71.67 2.48
 -2 -6 6 76.05 2.74
 -2 -6 6 71.77 2.8
 -2 6 5 3.97 0.49
 -2 6 5 5.16 0.67
 2 6 -5 5.82 0.69
 2 6 -5 5.25 0.81
 2 -6 -5 4.82 0.6
 2 -6 -5 4.05 0.6
 -2 -6 5 6.96 0.77
 -2 -6 5 5.65 0.7
 -2 6 4 395.19 12.77
 -2 6 4 377.61 12.89
 2 6 -4 405.6 12.78
 2 6 -4 403.67 12.68
 2 -6 -4 392.38 12.81
 2 -6 -4 384.51 13.12
 -2 -6 4 401.77 12.63
 -2 -6 4 393.59 12.43
 -2 6 3 39.82 2.35
 2 6 -3 47.75 2.47
 2 6 -3 47.27 2.54
 -2 -6 3 53.14 2.5
 -2 -6 3 45.58 2.53
 2 6 -2 192.69 6.41
 2 6 -2 190.38 6.37
 2 -6 -2 182.76 5.79
 2 -6 -2 183.28 5.79
 -2 -6 2 184.7 6.31
 -2 -6 2 178.9 6.1
 -2 6 1 0.37 0.35
 -2 6 1 0.24 0.3
 2 6 -1 2.39 0.65
 2 -6 -1 0.65 0.32
 2 -6 -1 0.48 0.31
 -2 -6 1 3.39 0.83
 -2 6 0 67.07 2.34
 -2 6 0 61.78 2.19
 2 6 0 70.89 2.33
 2 6 0 57.96 2.21
 2 -6 0 62.7 2.12
 2 -6 0 62.42 2.25
 -2 -6 0 59.87 2.15
 -2 -6 0 66.91 2.18
 -2 6 -1 24.38 1.09
 2 6 1 24.04 0.95
 2 6 1 21.86 0.83
 2 -6 1 21.47 1.23
 -2 -6 -1 22.04 0.9
 -2 -6 -1 24.11 0.97
 -2 6 -2 7.18 1.21
 2 6 2 8.7 0.9
 2 -6 2 5.19 1.2
 -2 -6 -2 12.31 0.94
 -2 -6 -2 8.89 1.05
 -2 6 -3 363.13 11.46
 -2 6 -3 367.32 11.6
 2 6 3 378.81 11.84
 2 6 3 373.16 11.65
 2 -6 3 375.05 11.8
 2 -6 3 365.04 11.68
 -2 -6 -3 376 11.74
 -2 -6 -3 373.55 12.33
 -2 6 -4 281.54 9.73
 -2 6 -4 261.99 9.28
 2 6 4 314.71 9.58
 2 6 4 304.76 9.79
 2 -6 4 282.93 9.33
 2 -6 4 302.81 9.48
 -2 -6 -4 305.11 9.48
 -2 -6 -4 289.19 9.77
 -2 6 -5 101.2 3.46
 -2 6 -5 105 3.72
 2 6 5 100.45 3.37
 2 6 5 103.28 3.31
 2 -6 5 105.17 3.55
 2 -6 5 106.38 3.42
 -2 -6 -5 99.22 3.4
 -2 -6 -5 98.63 3.4
 -2 6 -6 5.14 0.52
 -2 6 -6 4.96 0.36
 2 6 6 4.65 0.3
 2 6 6 5.61 0.27
 2 -6 6 5.31 0.53
 2 -6 6 5.41 0.73
 -2 -6 -6 5.67 0.28
 -2 -6 -6 4.54 0.37
 -2 6 -7 250.46 7.57
 -2 6 -7 235.8 7.58
 2 6 7 220.22 7.35
 2 6 7 245.02 7.28
 2 -6 7 255.38 7.8
 2 -6 7 245.97 7.64
 -2 -6 -7 230.32 7.36
 -2 -6 -7 224.16 7.29
 -2 6 -8 32.54 1.16
 -2 6 -8 29.97 1.13
 2 -6 8 31.2 1.1
 2 -6 8 29.46 1.14
 -2 6 -9 143 4.85
 -2 6 -9 126.98 4.43
 2 -6 9 125.82 4.3
 2 -6 9 133.35 4.65
 -2 6 -10 394.83 12.38
 -2 6 -10 392.68 12.45
 2 -6 10 400.03 12.03
 2 -6 10 372.42 12.14
 -2 6 -11 3.18 0.65
 -2 6 -11 3.13 0.36
 2 -6 11 2.79 0.66
 -2 6 -12 6.32 0.48
 -2 6 -12 5.49 0.49
 2 -6 12 6.19 0.49
 2 -6 12 7.86 0.49
 -2 6 -13 6.7 0.55
 -2 6 -13 6.87 0.52
 2 -6 13 6.74 0.56
 2 -6 13 7.93 0.53
 -2 6 -14 38.18 1.52
 -2 6 -14 39.41 1.93
 2 -6 14 37.19 1.54
 2 -6 14 39.55 1.65
 -2 6 -15 0.19 0.63
 2 -6 15 0.67 0.74
 2 -6 15 -0.23 0.7
 -2 6 -16 46.21 1.93
 2 -6 16 37.26 1.92
 2 -6 16 40.13 1.88
 -2 6 -17 37.76 1.82
 2 -6 17 33.14 1.89
 2 7 -18 8.11 0.97
 -2 -7 18 6.82 0.65
 -2 -7 18 6.47 0.86
 -2 7 17 0.43 0.41
 2 7 -17 -0.21 0.66
 2 7 -17 0.14 0.51
 2 -7 -17 0.86 0.41
 2 -7 -17 0.79 0.65
 -2 -7 17 -0.43 0.55
 -2 -7 17 0.68 0.58
 -2 7 16 57.78 2.05
 2 7 -16 59.94 2.37
 2 7 -16 55.14 2.84
 2 -7 -16 52.27 2.47
 2 -7 -16 65.74 2.24
 -2 -7 16 60.3 2.17
 -2 -7 16 63.6 2.18
 -2 7 15 0.24 0.36
 -2 7 15 -0.38 0.34
 2 7 -15 -0.62 0.53
 2 7 -15 0.01 0.39
 2 -7 -15 -0.13 0.36
 2 -7 -15 0.04 0.46
 -2 -7 15 -0.18 0.46
 -2 -7 15 -0.32 0.63
 -2 7 14 -0.14 0.32
 -2 7 14 0.06 0.38
 2 7 -14 -0.58 0.48
 2 7 -14 -0.08 0.4
 2 -7 -14 -0.22 0.45
 2 -7 -14 0.06 0.37
 -2 -7 14 0.04 0.38
 -2 -7 14 -0.39 0.52
 -2 7 13 234.89 7.6
 -2 7 13 236.25 7.97
 2 7 -13 239.72 8.02
 2 7 -13 239.12 7.55
 2 -7 -13 234.81 7.78
 2 -7 -13 240.2 7.89
 -2 -7 13 233.39 7.96
 -2 -7 13 231.3 7.61
 -2 7 12 118.37 3.92
 -2 7 12 119.08 4
 2 7 -12 111.92 3.88
 2 7 -12 117.56 3.97
 2 -7 -12 115.92 4.04
 2 -7 -12 117.38 3.9
 -2 -7 12 113.73 4.13
 -2 -7 12 111.82 4.05
 -2 7 11 6.87 0.7
 -2 7 11 6.05 0.7
 2 7 -11 4.19 0.59
 2 7 -11 3.94 0.41
 2 -7 -11 4.53 0.53
 2 -7 -11 8.18 0.99
 -2 -7 11 3.43 0.58
 -2 -7 11 4.36 0.56
 -2 7 10 12 1.03
 2 7 -10 12.86 1.23
 2 7 -10 10.95 1.06
 2 -7 -10 13.31 1.27
 2 -7 -10 10.8 0.78
 -2 -7 10 10.15 0.89
 -2 -7 10 11.13 0.88
 -2 7 9 174.23 7.02
 -2 7 9 185.19 7.73
 2 7 -9 230.15 7.71
 2 7 -9 211.35 7.8
 2 -7 -9 186.46 7.17
 2 -7 -9 206.07 7.54
 -2 -7 9 215.53 7.77
 -2 -7 9 231.8 7.8
 -2 7 8 104.77 3.74
 -2 7 8 105.75 3.67
 2 -7 -8 109.91 3.71
 2 -7 -8 103.91 3.66
 -2 -7 8 101.77 3.48
 -2 -7 8 101.07 3.68
 2 7 -7 7.98 0.57
 2 7 -7 8.27 0.6
 2 -7 -7 12.13 1.38
 2 -7 -7 7.96 1.22
 -2 7 6 76.64 2.8
 -2 7 6 84.56 3.19
 2 -7 -6 76.41 3.02
 2 -7 -6 80.08 2.81
 -2 7 5 21.31 0.97
 -2 7 5 20.34 0.88
 2 7 -5 18.75 0.85
 2 7 -5 20.86 0.82
 2 -7 -5 20.44 0.86
 2 -7 -5 20.85 1.03
 -2 -7 5 20.89 0.85
 -2 -7 5 18.29 0.8
 -2 7 4 142.51 4.86
 -2 7 4 146.37 4.84
 2 7 -4 154.57 5.28
 2 7 -4 160.79 5
 2 -7 -4 147.5 4.9
 2 -7 -4 145.92 5.13
 -2 -7 4 163.48 5.09
 -2 -7 4 141.59 4.85
 -2 7 3 37.8 1.56
 -2 7 3 40.95 1.5
 2 7 -3 44.5 1.6
 2 7 -3 43.02 1.56
 2 -7 -3 40.44 1.47
 -2 -7 3 46.16 1.71
 -2 -7 3 43.62 1.66
 2 7 -2 113.77 3.75
 2 7 -2 110.31 3.68
 2 -7 -2 117.78 3.78
 2 -7 -2 109.48 4.53
 -2 -7 2 121.39 3.99
 -2 -7 2 112.19 3.99
 -2 7 1 217 7.22
 -2 7 1 213.68 6.96
 2 7 -1 197.06 6.58
 2 7 -1 202.23 6.64
 2 -7 -1 211.15 6.85
 2 -7 -1 204.29 7.19
 -2 -7 1 200.96 6.72
 -2 -7 1 198.36 6.68
 -2 7 0 20.98 0.95
 -2 7 0 18.59 0.87
 2 7 0 19.23 0.73
 2 7 0 19.01 0.74
 2 -7 0 18.78 0.77
 2 -7 0 16.87 0.75
 -2 -7 0 18.24 0.72
 -2 -7 0 17.35 0.75
 -2 7 -1 270.31 8.59
 -2 7 -1 252.73 8.32
 2 7 1 267.66 8.33
 2 7 1 270.82 8.31
 2 -7 1 255.41 8.4
 2 -7 1 264.97 8.53
 -2 -7 -1 272.28 8.43
 -2 -7 -1 254.89 8.46
 -2 7 -2 9.2 0.71
 -2 7 -2 8.99 0.63
 2 -7 2 9.17 0.49
 2 -7 2 8.67 0.67
 -2 7 -3 8.23 0.92
 -2 7 -3 4.73 0.48
 2 7 3 5 0.42
 2 7 3 5.57 0.48
 2 -7 3 3.73 0.3
 2 -7 3 6.68 0.87
 -2 -7 -3 4.64 0.4
 -2 -7 -3 5.11 0.45
 -2 7 -4 26.37 1.64
 2 7 4 20.47 1.03
 2 -7 4 18.96 1.5
 2 -7 4 26.06 1.81
 -2 7 -5 -0.27 0.37
 -2 7 -5 0.31 0.36
 2 7 5 -0.15 0.22
 2 7 5 0.02 0.25
 2 -7 5 0.23 0.25
 2 -7 5 0.27 0.39
 -2 -7 -5 0.57 0.27
 -2 -7 -5 -0.27 0.37
 -2 7 -6 23.74 0.99
 -2 7 -6 23.51 1.02
 2 7 6 21.1 0.87
 2 -7 6 24.25 0.86
 2 -7 6 25.89 1.12
 -2 -7 -6 23.19 0.91
 -2 -7 -6 21.77 0.92
 -2 7 -7 46.74 1.75
 -2 7 -7 49.49 1.83
 2 7 7 57.15 1.78
 2 -7 7 49.28 1.77
 2 -7 7 50.19 1.79
 -2 -7 -7 58.35 1.75
 -2 -7 -7 54.76 1.92
 -2 7 -8 0.96 0.58
 -2 7 -8 0.61 0.44
 2 -7 8 0.09 0.18
 2 -7 8 1.03 0.61
 -2 7 -9 730.77 23.14
 -2 7 -9 725.17 23.4
 2 -7 9 768.41 23.53
 2 -7 9 738.84 23.03
 -2 7 -10 264.52 8.42
 -2 7 -10 263.96 8.17
 2 -7 10 263.52 8.05
 2 -7 10 238.77 8.06
 -2 7 -11 121.83 3.95
 -2 7 -11 118.36 3.92
 2 -7 11 125.57 4.12
 2 -7 11 120.18 4
 -2 7 -12 16.93 0.8
 -2 7 -12 15.39 0.85
 2 -7 12 16.51 0.82
 2 -7 12 16.74 0.86
 -2 7 -13 79.22 2.76
 -2 7 -13 86.11 2.75
 2 -7 13 72.91 2.87
 2 -7 13 78.58 2.89
 -2 7 -14 69.85 2.79
 -2 7 -14 71.94 2.52
 2 -7 14 66.39 2.5
 2 -7 14 73.53 2.54
 -2 7 -15 23.61 1.21
 2 -7 15 22.09 1.24
 2 -7 15 19.55 1.05
 -2 7 -16 84.38 2.88
 -2 7 -16 85.74 3.44
 2 -7 16 79.53 2.96
 -2 7 -17 -0.08 1.02
 2 -7 17 0.4 0.92
 2 -7 17 0.28 0.8
 -2 8 17 6.43 0.55
 -2 8 17 6.09 0.49
 2 8 -17 7.51 0.81
 2 8 -17 4.98 0.86
 2 -8 -17 6.22 0.87
 -2 -8 17 8.05 0.58
 -2 -8 17 7.16 0.99
 -2 8 16 39.67 1.92
 -2 8 16 41.21 1.7
 2 8 -16 48.46 1.97
 2 8 -16 42.67 2.26
 -2 -8 16 43.73 2.08
 -2 -8 16 50.18 1.89
 -2 8 15 59.42 2.38
 2 8 -15 56.87 2.51
 2 8 -15 66.05 2.36
 2 -8 -15 70.33 2.34
 -2 -8 15 66.1 2.39
 -2 -8 15 65.96 2.23
 -2 8 14 8.6 0.61
 2 8 -14 8.11 0.88
 2 8 -14 8.77 1.18
 2 -8 -14 6.2 0.55
 2 -8 -14 7.25 0.71
 -2 -8 14 8.58 0.72
 -2 -8 14 7.69 0.78
 -2 8 13 33.62 1.3
 -2 8 13 30.66 1.48
 2 8 -13 33.33 1.33
 2 8 -13 25.56 1.77
 2 -8 -13 30.28 1.22
 2 -8 -13 33.39 1.35
 -2 -8 13 35.2 1.55
 -2 -8 13 30.29 1.65
 -2 8 12 8.88 0.59
 -2 8 12 9.89 0.62
 2 8 -12 10.1 0.84
 2 8 -12 7.31 0.62
 2 -8 -12 9.46 0.51
 2 -8 -12 10.1 0.66
 -2 -8 12 8.09 0.51
 -2 -8 12 9.55 0.78
 -2 8 11 2.75 0.59
 -2 8 11 0.53 0.41
 2 8 -11 0.64 0.55
 2 8 -11 0.64 0.57
 2 -8 -11 0.71 0.29
 2 -8 -11 0.81 0.47
 -2 -8 11 0.53 0.46
 -2 -8 11 0.41 0.38
 -2 8 10 62.56 2.2
 -2 8 10 68.74 2.3
 2 8 -10 60.07 2.43
 2 -8 -10 59 2.24
 2 -8 -10 63.78 2.38
 -2 -8 10 59.15 2.24
 -2 -8 10 52.44 2.46
 2 8 -9 8.3 0.82
 2 8 -9 8.3 0.94
 2 -8 -9 13.38 1.51
 2 -8 -9 16.42 1.67
 -2 -8 9 9.1 0.72
 -2 -8 9 8.55 0.84
 -2 8 8 9.05 0.64
 -2 8 8 10.4 0.74
 2 -8 -8 8.84 0.62
 2 -8 -8 8.78 0.57
 -2 -8 8 7.61 0.49
 -2 -8 8 8.67 1.57
 -2 8 7 13.42 0.69
 -2 8 7 15.86 1.06
 2 8 -7 13.04 0.83
 2 8 -7 12.68 0.78
 2 -8 -7 14.72 0.94
 2 -8 -7 14.05 0.77
 -2 -8 7 12.79 0.75
 -2 -8 7 16.55 1
 -2 8 6 0.24 0.49
 -2 8 6 0.48 0.55
 2 8 -6 2.2 0.8
 2 8 -6 1.13 0.81
 2 -8 -6 0.44 0.42
 2 -8 -6 0.51 0.47
 -2 -8 6 1.68 0.69
 -2 -8 6 0.8 0.72
 -2 8 5 36.4 1.52
 -2 8 5 40.78 1.92
 2 8 -5 50.63 2.09
 2 8 -5 39.68 1.82
 2 -8 -5 43.8 1.88
 2 -8 -5 39.76 1.85
 -2 -8 5 45.39 1.82
 -2 -8 5 50.83 2.17
 -2 8 4 74.99 2.76
 -2 8 4 73.32 2.52
 2 8 -4 75.83 2.82
 2 8 -4 70.66 2.46
 2 -8 -4 73.3 2.47
 2 -8 -4 75.12 2.47
 -2 -8 4 66.67 2.43
 -2 -8 4 74.28 2.91
 -2 8 3 47.79 1.9
 -2 8 3 57.32 2.19
 2 8 -3 61.1 2.08
 2 8 -3 57.19 2.17
 2 -8 -3 53.46 2.1
 2 -8 -3 52.53 1.91
 -2 -8 3 56.16 2.15
 -2 -8 3 59.26 2.09
 -2 8 2 253.4 7.99
 -2 8 2 217.53 8.71
 2 8 -2 258.52 8.34
 2 8 -2 254.91 8.18
 -2 -8 2 258.8 8.31
 -2 -8 2 247.61 7.96
 -2 8 1 0.37 0.39
 2 8 -1 1.18 0.42
 2 8 -1 0.73 0.48
 2 -8 -1 0.46 0.27
 2 -8 -1 0.26 0.2
 -2 -8 1 0.67 0.42
 -2 -8 1 1.07 0.39
 -2 8 0 11.94 0.57
 -2 8 0 12.41 0.64
 2 8 0 14.72 0.95
 2 -8 0 12.46 0.61
 2 -8 0 11.44 0.58
 -2 -8 0 15.21 0.67
 -2 -8 0 13.02 0.88
 -2 8 -1 7.64 0.63
 -2 8 -1 6.42 0.4
 2 8 1 5.67 0.45
 2 8 1 5.51 0.38
 2 -8 1 7.72 0.45
 2 -8 1 7.3 0.6
 -2 -8 -1 5.98 0.41
 -2 -8 -1 5.21 0.43
 -2 8 -2 74.48 2.5
 -2 8 -2 60.79 2.66
 2 8 2 72.22 2.8
 2 8 2 72.4 2.53
 2 -8 2 68.12 2.9
 2 -8 2 65.09 2.3
 -2 -8 -2 75.74 2.78
 -2 -8 -2 72.32 2.76
 -2 8 -3 107.92 3.68
 -2 8 -3 100.94 3.35
 2 8 3 100.63 3.56
 2 8 3 103.63 3.35
 2 -8 3 105.5 3.51
 2 -8 3 100.96 3.41
 -2 -8 -3 104.78 3.51
 -2 -8 -3 103.04 3.44
 -2 8 -4 4.33 0.55
 -2 8 -4 4.74 0.44
 2 8 4 4.2 0.31
 2 8 4 8 0.69
 2 -8 4 5.79 0.45
 2 -8 4 4.21 0.6
 -2 -8 -4 4.55 0.74
 -2 8 -5 68.22 2.57
 -2 8 -5 68.6 2.32
 2 8 5 69.26 2.44
 2 8 5 74.27 2.57
 2 -8 5 73.07 2.45
 2 -8 5 77.15 3.03
 -2 -8 -5 71.25 2.5
 -2 -8 -5 68.39 2.55
 -2 8 -6 68.15 2.5
 -2 8 -6 74.61 2.74
 2 8 6 65.72 2.33
 2 8 6 65.92 2.22
 2 -8 6 73.08 2.43
 2 -8 6 71.89 2.88
 -2 -8 -6 64.22 2.25
 -2 -8 -6 59.42 2.17
 -2 8 -7 55.6 1.82
 -2 8 -7 49.71 1.77
 2 8 7 47.63 1.75
 2 8 7 51.06 1.73
 2 -8 7 53.59 1.93
 2 -8 7 52.73 1.77
 -2 -8 -7 48.08 1.7
 -2 -8 -7 46.22 1.76
 -2 8 -8 9.41 0.56
 2 8 8 10.25 0.38
 2 -8 8 9.84 0.5
 2 -8 8 11.3 0.62
 -2 -8 -8 11.5 0.42
 -2 -8 -8 10.3 0.45
 -2 8 -9 155.33 5.25
 -2 8 -9 157.87 5.54
 2 -8 9 158.66 5.48
 2 -8 9 164.71 5.2
 -2 8 -10 45.44 1.64
 -2 8 -10 43.19 1.69
 2 -8 10 42.42 1.45
 2 -8 10 43.99 1.59
 -2 8 -11 33.06 1.25
 -2 8 -11 32.07 1.37
 2 -8 11 32.29 1.22
 2 -8 11 29.49 1.32
 -2 8 -12 39.43 1.39
 -2 8 -12 33.7 1.52
 2 -8 12 37.72 1.44
 2 -8 12 36.01 1.35
 -2 8 -13 104.02 3.43
 -2 8 -13 97.33 3.55
 2 -8 13 93.42 3.69
 2 -8 13 97.2 3.28
 -2 8 -14 15.67 0.88
 -2 8 -14 15.35 1.02
 2 -8 14 16.55 1
 -2 8 -15 1.01 0.77
 -2 8 -15 0.5 0.72
 2 -8 15 0.95 0.77
 2 -8 15 0.42 0.64
 -2 8 -16 0.49 0.95
 2 -8 16 -0.18 0.88
 -2 8 -17 87.86 3.1
 -2 8 -17 81.5 3.55
 2 -8 17 84.85 3.24
 2 -8 17 77.52 3.56
 -2 9 17 2.32 0.58
 2 9 -17 1.32 0.92
 2 9 -17 1.97 0.77
 2 -9 -17 1.53 0.5
 2 -9 -17 2.42 0.78
 -2 -9 17 2.74 0.82
 -2 -9 17 2.61 0.68
 -2 9 16 57.5 2.02
 -2 9 16 52.79 2.13
 2 9 -16 54.47 2.19
 2 9 -16 51.33 2.12
 2 -9 -16 53.55 1.95
 -2 -9 16 51.24 2.16
 -2 -9 16 55.53 1.92
 -2 9 15 89.32 3.17
 -2 9 15 90.57 3.13
 2 9 -15 92.62 3.04
 2 9 -15 90.44 3.46
 2 -9 -15 86.65 3.08
 2 -9 -15 88.39 3.24
 -2 -9 15 88.63 3.18
 -2 -9 15 99.09 3.31
 -2 9 14 4.18 0.46
 -2 9 14 4.94 0.49
 2 9 -14 5.65 0.7
 2 9 -14 4.28 0.65
 2 -9 -14 4.51 0.55
 -2 -9 14 4.59 0.52
 -2 -9 14 4.05 0.7
 -2 9 13 11.94 1
 -2 9 13 11.88 0.99
 2 9 -13 12.7 0.84
 2 9 -13 12.54 0.93
 2 -9 -13 9.27 0.91
 2 -9 -13 11.75 0.96
 -2 -9 13 15.19 0.91
 -2 -9 13 11.95 0.99
 -2 9 12 34.83 1.44
 -2 9 12 30.78 1.39
 2 9 -12 31.38 1.67
 2 9 -12 29.47 1.57
 2 -9 -12 29.21 1.53
 2 -9 -12 32.45 1.42
 -2 -9 12 31.46 1.39
 -2 -9 12 30.75 1.57
 -2 9 11 7.75 0.46
 2 9 -11 7.28 0.59
 2 9 -11 7.13 0.55
 2 -9 -11 8.46 0.63
 2 -9 -11 9.89 0.7
 -2 -9 11 5.5 0.58
 -2 -9 11 6.68 0.49
 -2 9 10 19.24 1
 -2 9 10 17.17 0.81
 2 9 -10 16.1 0.83
 2 9 -10 19.84 1.29
 2 -9 -10 16.93 0.89
 2 -9 -10 15.25 0.82
 -2 -9 10 17.59 1.14
 -2 -9 10 13.31 1.09
 -2 9 9 0.28 0.51
 -2 9 9 -0.16 0.21
 2 9 -9 -0.36 0.36
 2 -9 -9 0.12 0.3
 2 -9 -9 -0.25 0.3
 -2 -9 9 -0.3 0.3
 -2 -9 9 0.24 0.32
 -2 9 8 7.13 0.94
 -2 9 8 10.49 1.3
 2 9 -8 5.74 0.81
 2 9 -8 8.56 0.8
 2 -9 -8 8.85 1.05
 2 -9 -8 6.94 0.94
 2 9 -7 118.67 4.68
 2 9 -7 112.4 4.81
 -2 -9 7 115.97 4.72
 -2 -9 7 123.84 4.84
 -2 9 6 58.35 3.3
 2 9 -6 56.85 2.91
 2 9 -6 58.72 3.02
 2 -9 -6 54.32 3
 2 -9 -6 59.63 3.02
 -2 -9 6 52.54 2.68
 -2 -9 6 58.86 3.14
 -2 9 5 20.46 0.91
 -2 9 5 22.2 0.92
 2 9 -5 20.05 0.86
 2 9 -5 21.63 1.07
 2 -9 -5 21.17 0.93
 2 -9 -5 20.4 0.82
 -2 -9 5 21.54 0.88
 -2 -9 5 19.96 0.83
 -2 9 4 55.58 2.14
 -2 9 4 63.19 2.36
 2 9 -4 59.81 2.13
 2 9 -4 63.48 2.55
 2 -9 -4 62.94 2.37
 2 -9 -4 56.62 2.04
 -2 -9 4 64.94 2.38
 -2 -9 4 57.81 2.2
 -2 9 3 17.74 1.02
 -2 9 3 18.67 1.17
 2 9 -3 20.44 0.97
 2 9 -3 22.76 1.34
 2 -9 -3 20.53 1.26
 2 -9 -3 19.29 0.87
 -2 -9 3 22.98 1.03
 -2 -9 3 19.68 0.91
 -2 9 2 260.36 8.9
 -2 9 2 262.93 8.62
 2 9 -2 262.32 8.8
 2 9 -2 269.57 8.55
 -2 -9 2 277.6 9.13
 -2 -9 2 268.52 8.54
 2 9 -1 52.23 2.12
 2 9 -1 47.67 1.86
 2 -9 -1 45.32 1.94
 2 -9 -1 41.94 1.72
 -2 -9 1 46.49 1.96
 -2 -9 1 45.28 1.93
 -2 9 0 12.68 0.62
 -2 9 0 11.72 0.63
 2 9 0 13.72 0.68
 2 9 0 13 0.64
 2 -9 0 12.77 0.63
 2 -9 0 11.68 0.58
 -2 -9 0 14.28 0.65
 -2 -9 0 13.76 0.64
 -2 9 -1 145.96 4.69
 -2 9 -1 149.29 5.14
 2 9 1 150.98 4.8
 2 9 1 146.09 4.77
 2 -9 1 155.97 5.06
 2 -9 1 145.27 4.64
 -2 -9 -1 142.11 4.78
 -2 -9 -1 136.13 4.74
 -2 9 -2 77.46 2.9
 -2 9 -2 66.26 2.92
 2 9 2 65.77 2.79
 2 9 2 70.53 2.8
 2 -9 2 63.95 2.67
 2 -9 2 71.44 2.85
 -2 -9 -2 61.13 2.67
 -2 -9 -2 69.6 2.82
 -2 9 -3 34.06 1.52
 -2 9 -3 32.25 1.3
 2 9 3 36.81 1.44
 2 9 3 37.15 1.35
 2 -9 3 35.86 1.54
 2 -9 3 33.61 1.56
 -2 -9 -3 37.56 1.54
 -2 -9 -3 38.83 1.44
 -2 9 -4 82.3 2.77
 -2 9 -4 81.62 2.76
 2 9 4 81.59 2.86
 2 9 4 86.62 2.68
 2 -9 4 83.71 2.77
 2 -9 4 82.69 2.85
 -2 -9 -4 84.54 2.97
 -2 -9 -4 81.19 2.79
 -2 9 -5 7.42 0.51
 -2 9 -5 7.65 0.57
 2 9 5 6.92 0.44
 2 9 5 7.51 0.41
 2 -9 5 7.09 0.46
 2 -9 5 7.74 0.55
 -2 -9 -5 7.57 0.39
 -2 -9 -5 8 0.49
 -2 9 -6 477.27 15.12
 -2 9 -6 487.6 15.39
 2 9 6 485.32 14.88
 2 9 6 471.46 15.26
 2 -9 6 477.49 14.94
 2 -9 6 480.4 15.1
 -2 -9 -6 486.75 14.97
 -2 -9 -6 457.41 14.91
 -2 9 -7 47.58 1.83
 -2 9 -7 45.56 1.66
 2 9 7 38.91 1.52
 2 9 7 47.15 1.48
 2 -9 7 46.94 1.59
 2 -9 7 47.38 1.83
 -2 -9 -7 39.31 1.51
 -2 -9 -7 40.2 1.52
 2 9 8 4.99 0.38
 2 9 8 4.41 0.36
 -2 -9 -8 5.49 0.45
 -2 -9 -8 3.99 0.49
 -2 9 -9 5.52 0.5
 -2 9 -9 5.62 0.49
 2 -9 9 5.78 0.44
 2 -9 9 5.95 0.56
 -2 9 -10 2.25 0.46
 -2 9 -10 2.41 0.4
 2 -9 10 2.16 0.38
 2 -9 10 2.05 0.49
 -2 9 -11 10.16 0.6
 -2 9 -11 9.45 0.66
 2 -9 11 8.63 0.61
 2 -9 11 8.1 0.61
 -2 9 -12 61.88 2.15
 2 -9 12 65.35 2.33
 -2 9 -13 0.13 0.66
 2 -9 13 0.43 0.69
 2 -9 13 1.55 0.6
 -2 9 -14 1.01 0.65
 -2 9 -14 0.42 0.57
 2 -9 14 0.93 0.71
 -2 9 -15 127.13 4.4
 -2 9 -15 124.23 4.44
 2 -9 15 132 4.48
 2 -9 15 135.36 4.38
 -2 9 -16 5.57 1.15
 2 -9 16 5.34 1.12
 2 -9 16 3.83 1.23
 -2 9 -17 13.07 1.39
 -2 9 -17 10.63 1.32
 2 -9 17 15.78 1.68
 -2 10 16 19.57 0.94
 2 10 -16 23.68 1.25
 2 -10 -16 17.38 1.34
 -2 -10 16 19.06 1.35
 2 10 -15 39.46 2.09
 2 10 -15 45.13 2.07
 -2 -10 15 42.72 1.94
 -2 -10 15 35.15 2.18
 -2 10 14 117.69 3.71
 -2 10 14 104.47 3.97
 2 10 -14 104.79 3.78
 2 10 -14 101.82 3.61
 2 -10 -14 108.84 3.66
 2 -10 -14 112.88 3.72
 -2 -10 14 111.11 3.63
 -2 -10 14 96.58 4.17
 -2 10 13 67.43 2.62
 -2 10 13 66.22 2.41
 2 10 -13 67.46 2.38
 2 10 -13 61.49 2.59
 2 -10 -13 58.56 2.4
 2 -10 -13 72.18 2.47
 -2 -10 13 69.41 2.34
 -2 10 12 2.95 0.7
 -2 10 12 2.72 0.5
 2 10 -12 1.53 0.43
 2 10 -12 0.92 0.45
 2 -10 -12 1.97 0.37
 2 -10 -12 1.86 0.49
 -2 -10 12 1.65 0.4
 -2 10 11 66.48 2.58
 -2 10 11 68.2 2.76
 2 10 -11 60.36 2.46
 2 10 -11 65.22 2.29
 2 -10 -11 75.87 2.79
 -2 -10 11 62.46 2.64
 -2 -10 11 62.23 2.3
 -2 10 10 210.22 7.04
 -2 10 10 202.41 7.2
 2 10 -10 204.82 6.55
 2 10 -10 216.15 7.28
 2 -10 -10 208.42 7.11
 2 -10 -10 205.02 6.57
 -2 -10 10 207.03 6.79
 -2 -10 10 203.21 6.56
 -2 10 9 183.4 5.69
 -2 10 9 173.53 6.35
 2 -10 -9 190.14 6.01
 2 -10 -9 186.11 5.82
 -2 -10 9 178.53 6.43
 -2 -10 9 169.54 7.72
 -2 10 8 10.22 0.62
 -2 10 8 11.48 0.69
 2 10 -8 11.04 0.85
 2 10 -8 12.4 0.79
 2 -10 -8 10.6 0.57
 2 -10 -8 10.53 0.6
 -2 -10 8 11.35 0.67
 -2 10 7 0.5 0.45
 -2 10 7 0.56 0.42
 2 10 -7 1.01 0.55
 2 10 -7 1.21 0.52
 2 -10 -7 0.59 0.27
 2 -10 -7 0.59 0.35
 -2 -10 7 0.03 0.41
 -2 -10 7 0.83 0.58
 -2 10 6 1.44 0.59
 -2 10 6 2.32 0.82
 2 10 -6 1.32 0.57
 2 10 -6 0.43 0.48
 2 -10 -6 1.77 0.63
 2 -10 -6 2.15 0.75
 -2 -10 6 1.03 0.43
 -2 -10 6 0.71 0.5
 -2 10 5 83.92 3.01
 -2 10 5 84.96 2.75
 2 10 -5 77.36 2.94
 2 10 -5 75.37 2.64
 2 -10 -5 81.53 2.74
 2 -10 -5 81.04 2.81
 -2 -10 5 80.49 2.76
 -2 -10 5 75.97 2.67
 2 10 -4 32.76 1.66
 2 10 -4 31.63 1.56
 -2 -10 4 32.7 1.54
 -2 -10 4 35 1.68
 -2 10 3 6.47 0.79
 -2 10 3 5.98 0.91
 2 10 -3 8.69 0.92
 2 10 -3 7.53 0.8
 2 -10 -3 6.8 0.87
 2 -10 -3 5.69 0.69
 -2 -10 3 7.01 0.73
 -2 -10 3 7.89 0.95
 -2 10 2 117.68 4.28
 -2 10 2 118.25 4.18
 2 10 -2 119.7 4.1
 2 10 -2 120.74 3.93
 2 -10 -2 131.48 4.19
 2 -10 -2 106.15 3.97
 -2 -10 2 117.28 3.99
 -2 -10 2 120.81 4.31
 2 10 -1 87.05 3.24
 2 10 -1 92.38 3.08
 2 -10 -1 96.63 3.1
 2 -10 -1 82.74 3.07
 -2 -10 1 96.89 3.29
 -2 -10 1 89.61 3.13
 -2 10 0 56.4 1.9
 -2 10 0 56.7 2.03
 2 10 0 59.01 2.08
 2 10 0 59.53 2.02
 2 -10 0 55.71 2.01
 2 -10 0 55.55 1.91
 -2 -10 0 54.17 2
 -2 -10 0 57.52 2.02
 -2 10 -1 151.71 5.65
 -2 10 -1 156.33 5.45
 2 10 1 159.54 5.31
 2 10 1 160.44 5.03
 2 -10 1 161.22 5.25
 2 -10 1 153.94 5.24
 -2 -10 -1 167.83 5.46
 -2 -10 -1 147.82 5
 -2 10 -2 120.68 4.11
 -2 10 -2 123.67 4.42
 2 10 2 129.57 4.16
 2 10 2 126.3 4.09
 2 -10 2 125.73 4.29
 2 -10 2 119.52 4.22
 -2 -10 -2 129.13 4.53
 -2 -10 -2 120.84 4.03
 -2 10 -3 128.2 4.18
 -2 10 -3 126.17 4.08
 2 10 3 131.23 4.58
 2 10 3 123.17 4.25
 2 -10 3 129.67 4.07
 2 -10 3 126.17 4.26
 -2 -10 -3 134.92 4.34
 -2 -10 -3 134.68 4.31
 -2 10 -4 152.28 4.91
 -2 10 -4 155.09 5.17
 2 10 4 151.94 5.08
 2 10 4 160.63 5.07
 2 -10 4 153.09 4.97
 2 -10 4 151.74 5.02
 -2 -10 -4 153.68 5.14
 -2 -10 -4 147.15 5
 -2 10 -5 4.73 1.35
 -2 10 -5 4.9 1.11
 2 10 5 5.23 0.42
 2 10 5 6.09 0.58
 2 -10 5 4.97 0.53
 2 -10 5 6.22 1.28
 -2 -10 -5 4.57 0.29
 -2 -10 -5 5.85 0.65
 -2 10 -6 50.1 1.73
 -2 10 -6 47.54 1.75
 2 10 6 46.78 1.72
 2 10 6 49.51 1.85
 2 -10 6 48.4 1.69
 2 -10 6 46.84 1.7
 -2 -10 -6 48.02 1.78
 -2 -10 -6 45.21 1.92
 -2 10 -7 30.78 1.15
 -2 10 -7 29.52 1.04
 2 10 7 26.61 1.05
 2 -10 7 27.57 1.21
 2 -10 7 28.15 1.08
 -2 -10 -7 25.83 1.04
 -2 -10 -7 25.83 1.1
 -2 10 -8 21.92 0.97
 -2 10 -8 21.06 1.02
 2 10 8 20.93 0.82
 2 -10 8 22.07 1.1
 2 -10 8 22.78 0.93
 -2 -10 -8 22.04 0.88
 -2 10 -9 88.04 3.03
 -2 10 -9 83.73 2.77
 2 10 9 78.56 2.56
 2 10 9 81.61 2.6
 2 -10 9 88.51 3.14
 2 -10 9 84.19 3.01
 -2 -10 -9 84.97 2.69
 -2 -10 -9 77.03 2.75
 -2 10 -10 64.95 2.32
 -2 10 -10 55.62 2.36
 2 -10 10 61.19 2.34
 2 -10 10 58.35 2.25
 -2 10 -11 7.23 0.69
 2 -10 11 6.13 0.46
 2 -10 11 5.45 0.62
 -2 10 -12 37.55 1.44
 -2 10 -13 0.47 0.62
 2 -10 13 -0.61 0.67
 2 -10 13 -0.61 0.56
 -2 10 -14 39.51 1.88
 2 -10 14 47.97 1.99
 -2 10 -15 1.16 1.09
 -2 10 -15 2.54 0.86
 2 -10 15 2.44 1.13
 2 -10 15 2.44 1.03
 -2 10 -16 156.68 5.47
 -2 10 -16 159.34 6.02
 2 -10 16 158.46 5.56
 2 -10 16 181.56 5.47
 2 11 -16 0.86 0.84
 2 -11 -16 0.45 0.69
 -2 -11 16 0.45 0.85
 -2 11 15 0.68 0.47
 2 11 -15 0.99 0.62
 -2 -11 15 0.6 0.66
 -2 11 14 28.24 1.42
 2 11 -14 24.8 1.23
 2 -11 -14 27.96 1.22
 -2 -11 14 25.87 1.24
 2 11 -13 -0.17 0.39
 2 11 -12 0.02 0.43
 2 11 -12 0.08 0.46
 2 -11 -12 0.07 0.48
 -2 -11 12 0.08 0.5
 -2 11 11 17.27 0.9
 -2 11 11 15.09 1.02
 2 11 -11 15.02 1.04
 2 11 -11 18.32 0.95
 2 -11 -11 11.89 1.12
 -2 -11 11 15.5 0.94
 -2 -11 11 16.4 0.91
 -2 11 10 36.96 1.65
 -2 11 10 34.23 1.48
 2 11 -10 34.26 1.31
 2 11 -10 39.06 1.59
 2 -11 -10 35.52 1.47
 -2 -11 10 34.81 1.28
 -2 -11 10 27.36 1.92
 -2 11 9 158.19 5.08
 -2 11 9 156.14 5.46
 2 11 -9 155.41 5.07
 2 -11 -9 164.57 5.26
 2 -11 -9 167.42 5.19
 -2 11 8 323.79 10.29
 -2 11 8 331.99 10.51
 2 11 -8 325.35 10.19
 2 11 -8 330.84 10.35
 2 -11 -8 337.07 10.39
 2 -11 -8 346.91 10.67
 -2 -11 8 314.05 10.2
 -2 -11 8 332.28 10.46
 -2 11 7 34.96 1.47
 -2 11 7 36.11 1.31
 2 11 -7 36.57 1.29
 2 11 -7 35.66 1.33
 2 -11 -7 35.9 1.29
 2 -11 -7 34.95 1.65
 -2 -11 7 35.67 1.27
 -2 -11 7 34.8 1.36
 -2 11 6 2.4 0.62
 -2 11 6 2.77 0.75
 2 11 -6 2.52 0.74
 2 11 -6 3.21 0.71
 2 -11 -6 2.18 0.53
 2 -11 -6 2.41 0.37
 -2 -11 6 4.51 0.73
 -2 -11 6 3.28 0.83
 -2 11 5 29.56 1.1
 -2 11 5 32.44 1.31
 2 11 -5 31.53 1.18
 2 11 -5 31.31 1.46
 2 -11 -5 28.92 1.32
 2 -11 -5 31.98 1.23
 -2 -11 5 32.21 1.2
 -2 -11 5 31 1.58
 -2 11 4 2.48 0.73
 -2 11 4 4.33 0.92
 2 11 -4 2.5 0.63
 2 11 -4 2.34 0.65
 2 -11 -4 3.94 0.79
 2 -11 -4 3.7 0.83
 -2 -11 4 2.29 0.53
 -2 -11 4 2.08 0.66
 -2 11 3 3.12 0.84
 -2 11 3 6.34 1.35
 2 11 -3 4.04 1.08
 2 11 -3 6.15 1.13
 2 -11 -3 3.35 1
 2 -11 -3 5.43 1.04
 -2 -11 3 5.84 1.06
 -2 -11 3 8.05 1.33
 -2 11 2 225.31 7.61
 -2 11 2 234.08 7.73
 2 11 -2 258.65 8.17
 2 11 -2 253.05 7.87
 2 -11 -2 230.86 7.9
 2 -11 -2 225.42 7.4
 -2 -11 2 252.81 7.67
 -2 -11 2 227.21 7.71
 2 11 -1 93.63 4.4
 2 11 -1 82.61 4.19
 -2 -11 1 84.99 3.54
 -2 -11 1 75.24 3.95
 -2 11 0 84.27 2.95
 2 11 0 89.58 3.37
 2 11 0 92.19 2.99
 2 -11 0 87.75 3.1
 2 -11 0 83.66 2.97
 -2 -11 0 90.59 3.12
 -2 -11 0 87.5 3.03
 -2 11 -1 41.62 2.13
 2 11 1 34.98 1.43
 2 11 1 37.99 1.36
 2 -11 1 43.64 2.07
 -2 -11 -1 35.34 1.49
 -2 -11 -1 37.39 1.47
 -2 11 -2 21.41 1.38
 2 11 2 17.44 1.31
 2 11 2 25.32 1.57
 2 -11 2 22 1.47
 -2 -11 -2 16.46 1.14
 -2 -11 -2 19.4 1.62
 -2 11 -3 246.22 8.31
 -2 11 -3 247.84 7.99
 2 11 3 254.41 8.41
 2 11 3 262.86 8.25
 2 -11 3 254.38 8.28
 2 -11 3 251.29 8.38
 -2 -11 -3 255.28 8.18
 -2 -11 -3 249.9 8.2
 -2 11 -4 59.27 2.26
 -2 11 -4 64.16 2.47
 2 11 4 61.26 2.32
 2 11 4 64.99 2.22
 2 -11 4 62.69 2.16
 2 -11 4 62.86 2.18
 -2 -11 -4 65.74 2.26
 -2 -11 -4 64.99 2.26
 -2 11 -5 30.3 1.14
 -2 11 -5 29.01 1.14
 2 11 5 27.99 1.21
 2 11 5 28.49 1.17
 2 -11 5 29.41 1.13
 2 -11 5 30.71 1.15
 -2 -11 -5 30.29 1.17
 -2 -11 -5 31.65 1.22
 -2 11 -6 120.82 4.03
 -2 11 -6 114.61 3.69
 2 11 6 108.39 4.17
 2 11 6 117.89 4
 2 -11 6 119.13 4.08
 2 -11 6 114.73 3.84
 -2 -11 -6 113.46 3.97
 -2 -11 -6 120.44 3.95
 -2 11 -7 15.68 0.79
 -2 11 -7 14.08 0.75
 2 11 7 14.16 0.7
 2 11 7 12.74 0.67
 2 -11 7 14.56 0.66
 2 -11 7 14.77 0.8
 -2 -11 -7 12.48 0.63
 -2 -11 -7 12.81 0.72
 -2 11 -8 12.8 1.1
 -2 11 -8 14.32 1.52
 2 -11 8 15.12 1.65
 -2 -11 -8 12.54 0.65
 -2 -11 -8 9.08 0.93
 -2 11 -9 3.84 0.69
 -2 11 -9 5.25 0.48
 2 -11 9 5.56 0.8
 2 -11 9 5.28 0.67
 -2 -11 -9 3.07 0.39
 -2 11 -10 3.2 0.5
 2 -11 10 2.09 0.49
 2 -11 10 2.56 0.53
 -2 11 -11 -0.17 0.57
 2 -11 11 0.16 0.43
 -2 11 -12 3.91 0.57
 -2 11 -13 0.22 0.49
 2 -11 13 0.86 0.56
 -2 11 -14 23.95 1.42
 2 -11 14 25.48 1.33
 2 -11 14 20.85 1.16
 -2 11 -15 40 1.81
 2 -11 15 35.85 1.72
 2 -11 15 37.3 1.62
 -2 12 15 3.78 0.5
 2 12 -15 3.24 0.67
 2 -12 -15 4.16 0.51
 -2 -12 15 1.98 0.61
 -2 12 14 -0.12 0.39
 2 12 -14 -0.13 0.43
 2 -12 -14 0.29 0.51
 -2 -12 14 -0.27 0.35
 2 12 -13 1.8 0.55
 -2 12 12 14.66 0.95
 -2 12 12 15.42 0.97
 2 12 -12 15.3 0.84
 2 12 -12 14.3 0.8
 2 -12 -12 14.01 0.87
 -2 -12 12 15.22 0.91
 -2 12 11 3.11 0.51
 -2 12 11 2.81 0.48
 2 12 -11 2.05 0.66
 2 12 -11 1.08 0.64
 2 -12 -11 3.29 0.39
 -2 -12 11 2.09 0.48
 -2 12 10 35.4 1.35
 -2 12 10 33.47 1.49
 2 12 -10 35.11 1.44
 2 -12 -10 31.82 1.32
 2 -12 -10 36.27 1.45
 -2 -12 10 31.66 1.33
 -2 12 9 107.12 4.07
 -2 12 9 114.23 3.71
 2 12 -9 122.96 4.17
 2 12 -9 108.69 4.05
 2 -12 -9 116.37 3.7
 2 -12 -9 120.98 3.91
 -2 12 8 49.27 1.74
 -2 12 8 46.63 1.7
 2 12 -8 48.66 2.01
 2 12 -8 45.66 1.65
 2 -12 -8 43.69 1.91
 2 -12 -8 49.55 1.79
 -2 -12 8 45.36 1.8
 -2 -12 8 47.25 1.7
 -2 12 7 2.01 0.45
 -2 12 7 2.8 0.63
 2 12 -7 2.54 0.68
 2 12 -7 2.29 0.53
 2 -12 -7 2.07 0.52
 2 -12 -7 2.35 0.52
 -2 -12 7 1.82 0.42
 -2 -12 7 1.77 0.57
 -2 12 6 4.63 0.77
 -2 12 6 5.62 0.68
 2 12 -6 5.91 0.79
 2 12 -6 4.92 0.71
 2 -12 -6 5.5 0.65
 2 -12 -6 4.77 0.67
 -2 -12 6 5.71 0.66
 -2 -12 6 6.01 0.78
 -2 12 5 157.55 5.62
 -2 12 5 172.45 5.85
 2 12 -5 176.55 6.03
 2 12 -5 160.24 5.55
 2 -12 -5 173.01 5.65
 2 -12 -5 170.13 5.5
 -2 -12 5 176.31 5.86
 -2 -12 5 168.31 5.87
 -2 12 4 2.01 0.68
 -2 12 4 2.1 0.58
 2 12 -4 1.31 0.68
 2 12 -4 2.74 0.65
 2 -12 -4 1.86 0.45
 2 -12 -4 1.73 0.57
 -2 -12 4 1.58 0.64
 -2 -12 4 1.71 0.71
 -2 12 3 197.34 6.8
 -2 12 3 204.46 7.28
 2 12 -3 207.4 7.28
 2 12 -3 211.14 7.43
 2 -12 -3 215.95 7.23
 2 -12 -3 211.03 6.98
 -2 -12 3 223.52 7.55
 -2 -12 3 208.04 7.17
 -2 12 2 5.19 0.75
 -2 12 2 6.65 0.87
 2 12 -2 6.61 0.88
 2 12 -2 6.99 0.86
 2 -12 -2 6.14 0.74
 2 -12 -2 4.72 0.39
 -2 -12 2 6.9 0.77
 -2 -12 2 5.13 0.8
 -2 12 1 359.26 11.66
 -2 12 1 344.59 11.52
 2 12 -1 344.04 11.29
 2 12 -1 356.23 11.19
 2 -12 -1 359.78 11.31
 -2 -12 1 355.87 11.44
 -2 -12 1 334.68 11.12
 2 12 0 172.4 5.68
 2 12 0 175.17 5.42
 2 -12 0 170.81 6.05
 2 -12 0 160.89 5.76
 -2 -12 0 167.45 5.42
 -2 -12 0 161.62 5.71
 -2 12 -1 87.91 3.06
 -2 12 -1 90.7 3.31
 2 12 1 71.3 3.07
 2 12 1 81.55 3.28
 2 -12 1 93.43 3.43
 2 -12 1 84.88 3.07
 -2 -12 -1 87.42 3.4
 -2 -12 -1 84.25 3.65
 -2 12 -2 102.92 3.49
 -2 12 -2 102.97 3.4
 2 12 2 106.35 3.56
 2 12 2 109.51 3.63
 2 -12 2 104.43 3.37
 2 -12 2 100.94 3.52
 -2 -12 -2 108.62 3.7
 -2 -12 -2 108.69 3.67
 -2 12 -3 408.17 12.84
 -2 12 -3 414.89 13.05
 2 12 3 390.88 13.12
 2 12 3 406.62 12.92
 2 -12 3 407.51 13.04
 2 -12 3 408.15 12.82
 -2 -12 -3 411.58 13.24
 -2 -12 -3 426.53 13.11
 -2 12 -4 66.16 2.23
 -2 12 -4 66.34 2.4
 2 12 4 67.43 2.62
 2 12 4 69.52 2.44
 2 -12 4 69.26 2.22
 2 -12 4 67.12 2.31
 -2 -12 -4 63.65 2.4
 -2 -12 -4 65.59 2.39
 -2 12 -5 52.41 2.12
 -2 12 -5 46.05 1.85
 2 12 5 44.92 1.92
 2 12 5 51.32 1.9
 2 -12 5 48.04 1.82
 2 -12 5 54.77 2.16
 -2 -12 -5 43.86 1.85
 -2 -12 -5 51.79 2
 -2 12 -6 82.81 2.96
 -2 12 -6 85.77 2.65
 2 12 6 81.6 2.94
 2 12 6 86.56 3.1
 2 -12 6 81.39 2.77
 2 -12 6 82.37 2.9
 -2 -12 -6 81.62 2.78
 -2 -12 -6 75.3 3.08
 -2 12 -7 12.34 0.71
 -2 12 -7 12.41 0.68
 2 12 7 13.97 1.06
 2 12 7 15.38 1.13
 2 -12 7 11.21 0.74
 2 -12 7 11.57 0.83
 -2 -12 -7 17.36 1.09
 -2 -12 -7 12.44 1.08
 -2 12 -8 -0.22 0.55
 -2 12 -8 0.66 0.42
 2 12 8 1.78 0.5
 2 -12 8 -0.01 0.28
 2 -12 8 0.27 0.58
 -2 -12 -8 0.36 0.43
 -2 -12 -8 -0.06 0.45
 -2 12 -9 6.45 0.82
 -2 12 -9 5.48 0.78
 2 -12 9 8.62 0.79
 2 -12 9 8.91 0.86
 -2 12 -10 29.91 1.29
 2 -12 10 29.49 1.28
 2 -12 10 30.39 1.32
 -2 12 -11 99.66 3.84
 2 -12 11 95 3.2
 -2 12 -12 9.48 0.85
 -2 12 -13 154 5.07
 2 -12 13 163.54 5.65
 -2 12 -14 3.19 0.81
 2 -12 14 3.11 1.08
 2 -12 14 1.77 0.55
 -2 12 -15 4.16 1.09
 2 -12 15 4.79 1.07
 -2 13 13 6.86 0.53
 -2 13 12 16.36 1.11
 -2 13 12 16.15 0.77
 2 13 -12 13.39 0.85
 2 13 -12 12.27 1.14
 2 -13 -12 15.79 0.83
 -2 -13 12 13.76 0.72
 -2 -13 12 11.65 0.79
 -2 13 11 56.44 2.14
 -2 13 11 52.56 1.81
 2 13 -11 42.45 2.48
 2 13 -11 55.63 3
 2 -13 -11 51.75 2.18
 2 -13 -11 57.15 1.99
 -2 -13 11 54.74 4.06
 -2 13 10 7.18 0.66
 -2 13 10 7.59 0.7
 2 -13 -10 8.54 0.69
 2 -13 -10 7.45 0.66
 -2 -13 10 8.38 0.64
 -2 13 9 120.28 4.26
 -2 13 9 119.12 3.89
 2 13 -9 115.5 4.33
 2 13 -9 117.94 3.97
 2 -13 -9 125.9 4.37
 2 -13 -9 129.08 3.93
 -2 -13 9 113.81 4.06
 -2 -13 9 124.79 4.38
 -2 13 8 64.3 2.08
 -2 13 8 65.46 2.42
 2 13 -8 53.36 2.64
 2 13 -8 60.19 2.19
 2 -13 -8 61.82 2.2
 2 -13 -8 62.5 2.25
 -2 -13 8 57.71 2.39
 -2 -13 8 61.1 2.21
 -2 13 7 36.97 1.5
 -2 13 7 40.32 1.72
 2 13 -7 37.78 1.59
 2 13 -7 35.17 1.64
 2 -13 -7 36.29 1.44
 2 -13 -7 35.43 1.49
 -2 -13 7 36.84 1.51
 -2 -13 7 36.74 1.75
 -2 13 6 0.17 0.52
 -2 13 6 0.66 0.47
 2 13 -6 0.65 0.65
 2 13 -6 0.18 0.63
 2 -13 -6 0.84 0.41
 2 -13 -6 0.7 0.41
 -2 -13 6 -0.06 0.51
 -2 -13 6 1.13 0.68
 -2 13 5 88.43 3.01
 -2 13 5 82.85 2.84
 2 13 -5 85.36 3.08
 2 13 -5 83.84 3.08
 2 -13 -5 85.22 2.95
 2 -13 -5 86.34 3.04
 -2 -13 5 85.26 3.04
 -2 -13 5 84.79 3.22
 -2 13 4 2.52 1
 -2 13 4 3.76 1.13
 2 13 -4 1.33 0.48
 2 13 -4 0.85 0.56
 2 -13 -4 0.68 0.56
 2 -13 -4 0.53 0.92
 -2 -13 4 0.34 0.46
 -2 -13 4 -0.07 0.58
 -2 13 3 30.77 1.35
 -2 13 3 32.54 1.36
 2 13 -3 31.17 1.37
 2 13 -3 32.61 1.53
 2 -13 -3 33.27 1.39
 2 -13 -3 30.71 1.23
 -2 -13 3 34.87 1.32
 -2 -13 3 34.23 1.43
 -2 13 2 78.31 3.05
 -2 13 2 77.8 2.81
 2 13 -2 72.8 2.74
 2 13 -2 78.78 2.75
 2 -13 -2 77.3 3.06
 2 -13 -2 75.76 2.47
 -2 -13 2 78.95 2.89
 -2 -13 2 75.21 3.04
 -2 13 1 33.46 1.32
 -2 13 1 34.5 1.58
 2 13 -1 32.73 1.56
 2 13 -1 38.12 1.5
 2 -13 -1 37.69 1.65
 2 -13 -1 35 1.39
 -2 -13 1 35.76 1.4
 -2 -13 1 37.61 1.47
 2 13 0 23.81 1.35
 2 13 0 28.68 1.45
 2 -13 0 24.73 1.06
 -2 -13 0 22.84 1.27
 -2 -13 0 25.02 1.43
 -2 13 -1 45.42 1.96
 -2 13 -1 46.06 1.66
 2 13 1 48 1.98
 2 13 1 50.97 2.05
 2 -13 1 43.4 1.69
 2 -13 1 44.02 1.98
 -2 -13 -1 46.76 1.68
 -2 -13 -1 47.38 1.66
 -2 13 -2 2.44 0.59
 -2 13 -2 5.11 0.7
 2 13 2 3.3 0.55
 2 13 2 5.58 0.75
 2 -13 2 3.61 0.56
 2 -13 2 3.23 0.63
 -2 -13 -2 3.27 0.47
 -2 -13 -2 4.04 0.66
 -2 13 -3 71.5 2.44
 -2 13 -3 67.54 2.59
 2 13 3 81.54 2.86
 2 13 3 81.93 2.7
 2 -13 3 69.8 2.35
 2 -13 3 68.76 2.47
 -2 -13 -3 72.31 2.6
 -2 -13 -3 73.66 2.65
 -2 13 -4 31.74 1.24
 -2 13 -4 32.83 1.35
 2 13 4 31.42 1.43
 2 13 4 31.8 1.33
 2 -13 4 32.07 1.32
 2 -13 4 30.5 1.21
 -2 -13 -4 33.21 1.36
 -2 -13 -4 36.74 1.51
 -2 13 -5 18.23 1.01
 -2 13 -5 17.32 0.92
 2 13 5 16.23 1.08
 2 13 5 18.11 0.93
 2 -13 5 17.38 0.88
 2 -13 5 20.52 1.06
 -2 -13 -5 18.61 1.04
 -2 -13 -5 15.15 0.94
 -2 13 -6 39.97 1.87
 -2 13 -6 48.16 1.68
 2 13 6 39.18 1.62
 2 13 6 37.44 1.64
 2 -13 6 43.83 1.52
 2 -13 6 43.23 1.61
 -2 -13 -6 38.25 1.54
 -2 -13 -6 37.8 1.67
 -2 13 -7 2.3 0.55
 2 13 7 2.19 0.53
 2 13 7 1.61 0.36
 2 -13 7 1.73 0.56
 -2 -13 -7 1.85 0.38
 -2 -13 -7 2.3 0.53
 -2 13 -8 78.29 3.22
 -2 13 -8 74.39 2.5
 2 13 8 65.55 2.77
 2 13 8 74.22 2.67
 2 -13 8 75 2.81
 2 -13 8 78.01 2.59
 -2 -13 -8 81.99 2.8
 -2 -13 -8 71.01 2.69
 -2 13 -9 0.27 0.67
 -2 13 -9 1.39 0.83
 2 -13 9 0.26 0.69
 2 -13 9 -0.35 0.45
 -2 -13 -9 0.13 0.4
 -2 13 -10 6.02 0.78
 -2 13 -10 5.13 0.63
 2 -13 10 5.65 0.47
 2 -13 10 6.09 0.74
 -2 13 -11 31.82 1.52
 2 -13 11 32.52 1.57
 -2 13 -12 1.85 0.71
 2 -13 12 2.36 0.83
 2 -13 12 2.59 0.77
 -2 13 -13 82.1 3.19
 2 -13 13 84.92 2.98
 2 -13 13 88.24 2.98
 2 -13 14 0.24 1.07
 -2 14 12 8.65 0.87
 -2 14 12 5.81 0.59
 2 14 -12 5.77 0.84
 2 -14 -12 8.03 0.46
 -2 -14 12 6.73 0.72
 -2 14 11 23.79 1.26
 -2 14 11 17.78 1.13
 2 14 -11 16.46 1.42
 2 14 -11 29.19 2.05
 2 -14 -11 21.29 0.9
 2 -14 -11 24.51 1.25
 -2 -14 11 17 1.25
 -2 -14 11 26.33 2.23
 -2 14 10 2.35 0.48
 -2 14 10 2.76 0.5
 2 14 -10 0.97 0.78
 2 14 -10 3.32 0.48
 2 -14 -10 1.75 0.37
 2 -14 -10 3.22 0.46
 -2 14 9 90.69 2.98
 -2 14 9 85.47 3.33
 2 14 -9 73.63 3.53
 2 14 -9 83.14 3.61
 2 -14 -9 88.18 2.82
 2 -14 -9 94.81 3.01
 -2 -14 9 84.8 3.03
 -2 -14 9 79.18 3.85
 -2 14 8 1.42 0.52
 -2 14 8 1.55 0.34
 2 14 -8 0.89 0.71
 2 14 -8 0.8 0.58
 2 -14 -8 1.79 0.38
 -2 -14 8 1.33 0.53
 -2 -14 8 0.45 0.6
 -2 14 7 5.43 0.5
 2 14 -7 6.88 0.59
 2 14 -7 5.45 0.56
 2 -14 -7 5.22 0.46
 -2 -14 7 6.7 0.57
 -2 -14 7 5.4 0.63
 -2 14 6 138.39 4.51
 -2 14 6 131.37 4.49
 2 14 -6 136.44 4.85
 2 14 -6 127.61 4.46
 2 -14 -6 130.92 4.44
 2 -14 -6 137.03 4.58
 -2 -14 6 139.24 4.57
 -2 -14 6 139.7 4.99
 -2 14 5 78.57 2.65
 -2 14 5 74.6 2.74
 2 14 -5 77.62 2.87
 2 14 -5 74.99 3.19
 2 -14 -5 77.35 2.7
 2 -14 -5 78.37 2.68
 -2 -14 5 79.52 2.7
 -2 -14 5 72.28 2.89
 -2 14 4 10.97 0.8
 -2 14 4 10.01 0.73
 2 14 -4 9.39 0.73
 2 14 -4 10.9 0.86
 2 -14 -4 9.84 0.72
 2 -14 -4 9.45 0.6
 -2 -14 4 10.05 0.64
 -2 -14 4 10.18 0.81
 -2 14 3 1.85 0.83
 -2 14 3 1.3 0.45
 2 14 -3 0.45 0.55
 2 14 -3 0.96 0.64
 2 -14 -3 2.56 0.74
 2 -14 -3 1.54 0.68
 -2 -14 3 0.91 0.48
 -2 -14 3 1.61 0.64
 -2 14 2 12.22 1.09
 -2 14 2 9.33 1.16
 2 14 -2 13.24 1.39
 2 14 -2 11.3 1.32
 2 -14 -2 12.8 1.45
 2 -14 -2 10.64 1.07
 -2 -14 2 9.07 1.07
 -2 -14 2 10.92 1.34
 -2 14 1 145.95 5.19
 -2 14 1 145.3 5.22
 2 14 -1 146.36 4.82
 2 14 -1 153.02 5.05
 2 -14 -1 146.43 5.25
 2 -14 -1 148.05 5.24
 -2 -14 1 139.92 4.92
 -2 -14 1 144.02 4.82
 -2 14 0 120.61 4.71
 -2 14 0 116.91 4.79
 2 14 0 121.56 4.24
 2 14 0 129.71 4.02
 -2 -14 0 114.59 4.12
 -2 -14 0 126.85 4.49
 -2 14 -1 29.53 1.6
 2 14 1 30.41 1.44
 2 14 1 39.19 1.69
 2 -14 1 30.21 1.4
 2 -14 1 28.91 1.45
 -2 -14 -1 36.2 1.66
 -2 -14 -1 35.55 1.6
 -2 14 -2 6.92 0.65
 -2 14 -2 8.92 0.58
 2 14 2 8.06 0.8
 2 14 2 8.61 0.75
 2 -14 2 7.93 0.53
 2 -14 2 6.92 0.63
 -2 -14 -2 8.29 0.6
 -2 -14 -2 8.11 0.71
 -2 14 -3 47.88 1.79
 -2 14 -3 52.06 2.08
 2 -14 3 50.45 2.21
 2 -14 3 49.6 1.76
 -2 -14 -3 50.28 2.47
 -2 14 -4 48.17 1.75
 -2 14 -4 49.25 1.67
 2 14 4 46.22 1.96
 2 14 4 54.3 1.91
 2 -14 4 47.73 1.71
 2 -14 4 43.61 1.82
 -2 -14 -4 44.51 1.86
 -2 -14 -4 45.76 1.95
 -2 14 -5 0.63 0.62
 -2 14 -5 1.29 0.66
 2 14 5 0.64 0.49
 2 14 5 1.48 0.68
 2 -14 5 1.14 0.58
 2 -14 5 1.86 0.55
 -2 -14 -5 0.81 0.45
 -2 -14 -5 1.53 0.65
 -2 14 -6 35.14 1.57
 2 14 6 25.89 1.38
 2 14 6 31.93 1.35
 2 -14 6 34.99 1.53
 -2 -14 -6 31.06 1.3
 -2 -14 -6 29.39 1.44
 -2 14 -7 9.24 0.75
 2 14 7 10.33 0.8
 2 -14 7 9.46 0.73
 -2 -14 -7 8.44 0.87
 -2 14 -8 73.63 2.56
 -2 14 -8 68.73 2.59
 2 14 8 69.49 2.57
 2 14 8 70.85 2.65
 2 -14 8 75.56 2.94
 2 -14 8 71.6 2.56
 -2 -14 -8 78.51 2.68
 -2 -14 -8 71.44 2.88
 -2 14 -9 -0.57 0.69
 -2 14 -9 0.4 0.73
 2 -14 9 0.08 0.6
 -2 14 -10 9.8 0.88
 -2 14 -10 8.71 0.84
 2 -14 10 9.66 0.69
 -2 14 -11 0.03 0.79
 2 -14 11 0.86 0.77
 -2 14 -12 46.28 1.81
 -2 14 -12 42.99 1.93
 2 -14 12 40.16 2.13
 2 -14 12 44.97 2.1
 -2 14 -13 54.84 2.1
 -2 14 -13 48.44 2.53
 2 -14 13 52.88 2.22
 2 -14 13 52.69 2.07
 -2 15 12 207.67 6.33
 -2 15 12 199.46 6.17
 2 15 -12 181.93 7.68
 2 15 -12 181.38 7.85
 2 -15 -12 206.1 7.14
 -2 -15 12 177.28 7.39
 -2 -15 12 199.23 8.11
 2 15 -11 19.93 1.81
 2 -15 -11 25.68 1.33
 -2 -15 11 23.17 1.56
 -2 -15 11 20.23 1.96
 -2 15 10 7.47 0.74
 2 15 -10 10.57 1.45
 2 15 -10 10.44 0.85
 2 -15 -10 13.3 0.88
 2 -15 -10 9.97 0.72
 -2 -15 10 13.38 1.13
 -2 15 9 5.19 0.8
 2 15 -9 5.05 0.87
 2 15 -9 3.46 0.73
 2 -15 -9 5 0.58
 -2 -15 9 5.78 0.83
 -2 -15 9 4.77 0.57
 -2 15 8 1 0.52
 -2 15 8 1.18 0.44
 2 15 -8 0.8 0.49
 2 15 -8 1.28 0.8
 2 -15 -8 1.13 0.25
 -2 -15 8 1.21 0.46
 -2 -15 8 1 0.87
 -2 15 7 25.67 1.05
 2 15 -7 25.03 1.18
 2 15 -7 25.38 1.33
 2 -15 -7 26.76 1.1
 -2 -15 7 28.99 1.13
 -2 -15 7 23.22 1.53
 -2 15 6 12.29 1.13
 -2 15 6 11.75 1.06
 2 15 -6 11.93 0.7
 2 -15 -6 11.44 1.05
 2 -15 -6 10.83 1.08
 -2 -15 6 7.19 0.95
 -2 -15 6 12.02 0.74
 -2 15 5 2.4 0.77
 -2 15 5 2.55 0.73
 2 15 -5 1.32 0.43
 2 -15 -5 2.22 0.43
 2 -15 -5 1.66 0.53
 -2 -15 5 1.33 0.63
 -2 -15 5 2.72 0.68
 -2 15 4 3.69 0.57
 -2 15 4 3.57 0.6
 2 15 -4 6.28 1.29
 2 15 -4 3.99 0.74
 2 -15 -4 4.28 0.57
 2 -15 -4 2.75 0.45
 -2 -15 4 4.7 1.1
 -2 -15 4 3.92 0.74
 -2 15 3 45.11 1.67
 -2 15 3 44.65 1.75
 2 15 -3 44.34 1.79
 2 15 -3 45.34 1.76
 2 -15 -3 45.11 1.77
 2 -15 -3 43.84 1.78
 -2 -15 3 47.89 1.83
 -2 -15 3 44.94 1.74
 -2 15 2 21.28 1.01
 -2 15 2 19.57 1.1
 2 15 -2 20.52 1.16
 2 15 -2 19.91 1.18
 2 -15 -2 19.61 1.02
 2 -15 -2 20.69 1.04
 -2 -15 2 18.93 0.88
 -2 -15 2 21.02 1.04
 -2 15 1 15.94 1.2
 -2 15 1 17.86 1.22
 2 15 -1 19.52 1.27
 2 15 -1 19.22 1.14
 2 -15 -1 17.7 1.2
 2 -15 -1 15.42 0.99
 -2 -15 1 18.74 0.93
 -2 -15 1 17.87 1.23
 -2 15 0 46.87 2.14
 -2 15 0 48.86 1.73
 2 15 0 45.56 2.33
 2 15 0 46.03 2.08
 2 -15 0 45.01 2.01
 -2 -15 0 44.91 1.79
 -2 -15 0 47.81 1.71
 2 15 1 112.38 3.96
 2 15 1 114.92 3.75
 2 -15 1 103.74 3.63
 2 -15 1 98.56 3.69
 -2 -15 -1 113.58 4.21
 -2 15 -2 8.9 0.73
 -2 15 -2 9.8 0.63
 2 15 2 10.07 0.85
 2 15 2 11.45 0.78
 2 -15 2 9.19 0.6
 2 -15 2 10.11 0.73
 -2 -15 -2 11.04 0.73
 -2 15 -3 6.43 0.69
 -2 15 -3 6.7 0.64
 2 15 3 6.34 0.73
 2 15 3 8.89 0.79
 2 -15 3 7.65 0.58
 2 -15 3 6.56 0.64
 -2 -15 -3 7.21 0.53
 -2 15 -4 3.13 0.69
 -2 15 -4 4.99 0.64
 2 15 4 2.98 0.64
 2 15 4 3.98 0.62
 2 -15 4 3.45 0.57
 2 -15 4 1.68 0.61
 -2 -15 -4 2.56 0.46
 -2 -15 -4 2.66 0.62
 -2 15 -5 0.84 0.61
 -2 15 -5 0.62 0.63
 2 15 5 0.05 0.42
 2 15 5 -0.52 0.58
 2 -15 5 1.32 0.52
 2 -15 5 1 0.55
 -2 -15 -5 0.15 0.3
 -2 -15 -5 0.31 0.74
 -2 15 -6 0.86 0.65
 2 15 6 0.13 0.96
 2 15 6 -0.09 0.66
 2 -15 6 0.79 0.58
 -2 -15 -6 0.63 0.64
 -2 -15 -6 0.35 0.65
 -2 15 -7 1.02 0.67
 -2 15 -7 0.52 0.56
 2 15 7 -0.45 0.69
 2 -15 7 0.58 0.31
 2 -15 7 0.84 0.58
 -2 -15 -7 -1.12 1.03
 -2 15 -8 3.53 0.77
 -2 15 -8 3.34 0.81
 2 15 8 2.73 0.78
 2 15 8 4.19 0.91
 2 -15 8 3.52 0.49
 2 -15 8 3.33 0.66
 -2 -15 -8 3.76 0.58
 -2 -15 -8 1.85 1.03
 -2 15 -9 0.56 0.68
 -2 15 -9 0.27 0.53
 2 -15 9 0.62 0.6
 -2 -15 -9 -0.32 0.68
 -2 15 -10 0.19 0.81
 -2 15 -10 0.26 0.79
 2 -15 10 -0.07 0.57
 2 -15 10 0.18 0.8
 -2 15 -11 16.12 1.17
 2 -15 11 14.98 1.18
 -2 15 -12 11.88 1.18
 -2 15 -12 11.69 1.07
 2 -15 12 12.38 0.96
 2 -15 12 12.6 1.02
 2 16 -10 11.46 0.99
 -2 -16 10 9.99 1
 -2 16 9 11.2 1.06
 -2 16 9 11.85 0.82
 2 16 -9 9.18 1.16
 2 -16 -9 11.13 0.8
 -2 -16 9 6.9 0.77
 -2 -16 9 7.69 1.34
 -2 16 8 -0.08 0.57
 2 16 -8 -0.75 0.84
 2 -16 -8 -0.05 0.46
 -2 -16 8 -0.72 0.65
 -2 -16 8 -0.95 0.94
 -2 16 7 0.69 0.56
 2 16 -7 0.32 0.72
 2 -16 -7 0.68 0.47
 -2 -16 7 -0.01 0.61
 -2 -16 7 0.67 0.8
 -2 16 6 70.63 2.63
 -2 16 6 69.63 2.57
 2 16 -6 68.42 2.68
 2 -16 -6 75.06 2.51
 2 -16 -6 69.17 2.7
 -2 -16 6 83.13 2.7
 -2 -16 6 70.42 3.07
 -2 16 5 21.06 1.16
 -2 16 5 23.23 1.04
 2 16 -5 20.87 1.42
 2 16 -5 21.63 1.14
 2 -16 -5 24.57 0.97
 2 -16 -5 20.68 1.01
 -2 -16 5 23.92 1.21
 -2 -16 5 18.99 1.34
 -2 16 4 1.16 0.56
 2 16 -4 1.02 0.66
 2 16 -4 1.86 0.6
 2 -16 -4 1.23 0.49
 -2 -16 4 1.28 0.51
 -2 -16 4 1.44 0.66
 -2 16 3 41.91 1.5
 -2 16 3 40.56 1.46
 2 16 -3 40.49 1.75
 2 16 -3 39.42 1.6
 2 -16 -3 39.15 1.56
 2 -16 -3 38.97 1.58
 -2 -16 3 34.05 1.71
 -2 -16 3 38.1 1.67
 -2 16 2 59.53 2.4
 -2 16 2 55.7 2.08
 2 16 -2 59.2 2.59
 2 16 -2 58.65 2.12
 2 -16 -2 59.66 2.03
 2 -16 -2 62.07 2.48
 -2 -16 2 57.11 2.17
 -2 -16 2 58.32 2.05
 -2 16 1 63.62 2.9
 -2 16 1 64.34 2.19
 2 16 -1 69.66 2.72
 2 16 -1 63.91 2.37
 2 -16 -1 64.92 2.21
 2 -16 -1 62.69 2.44
 -2 -16 1 66.74 2.4
 -2 -16 1 64.01 2.39
 -2 16 0 7.33 0.8
 -2 16 0 9.14 0.73
 2 16 0 9.82 0.92
 2 16 0 9.35 0.77
 2 -16 0 8.95 0.7
 2 -16 0 8.82 0.68
 -2 -16 0 9.27 0.7
 -2 16 -1 81.81 3.65
 -2 16 -1 74.4 3.3
 2 16 1 82.46 3.37
 -2 -16 -1 90.26 3.46
 -2 16 -2 6.28 1.07
 -2 16 -2 7.25 0.8
 2 16 2 4.18 0.89
 2 -16 2 4.37 0.72
 2 -16 2 4.46 0.9
 -2 -16 -2 4.91 0.6
 -2 16 -3 34.57 1.52
 -2 16 -3 39.77 1.43
 2 16 3 34.25 1.55
 2 16 3 37.99 1.52
 2 -16 3 39.11 1.44
 2 -16 3 32.57 1.54
 -2 -16 -3 37.43 1.81
 -2 16 -4 27.63 1.24
 -2 16 -4 29.6 1.26
 2 16 4 29.94 1.57
 2 16 4 28.51 1.39
 2 -16 4 28.93 1.09
 2 -16 4 26.07 1.23
 -2 -16 -4 32.09 1.27
 -2 16 -5 5 0.8
 -2 16 -5 8.1 1.02
 2 16 5 4.49 0.68
 2 16 5 7.43 0.83
 2 -16 5 7.84 0.96
 2 -16 5 5.67 0.68
 -2 -16 -5 6.05 0.55
 -2 -16 -5 8.99 0.94
 -2 16 -6 4.28 1.5
 -2 16 -6 5.74 1.32
 2 16 6 -0.72 0.8
 2 -16 6 0.34 0.62
 2 -16 6 1.58 1.28
 -2 -16 -6 -0.64 0.86
 -2 16 -7 31.86 1.67
 -2 16 -7 26.96 1.53
 2 16 7 32.51 1.58
 2 -16 7 28.63 1.4
 2 -16 7 32.16 1.47
 -2 -16 -7 36.03 1.92
 -2 16 -8 101.66 3.43
 -2 16 -8 98.86 3.33
 2 16 8 95.37 3.78
 2 16 8 97.26 3.77
 2 -16 8 93.36 3.51
 2 -16 8 97.14 3.39
 -2 -16 -8 103.24 3.59
 -2 16 -9 6.12 0.92
 -2 16 -9 2.99 0.93
 2 16 9 4.32 1.14
 2 -16 9 6.34 0.74
 2 -16 9 6 0.81
 -2 16 -10 4.58 1.03
 -2 16 -10 5.38 1.02
 2 -16 10 4.93 0.82
 -2 16 -11 16.84 1.8
 2 -16 11 26.25 1.57
 -2 17 9 103.22 3.59
 -2 17 9 91 3.29
 2 17 -9 96.39 3.48
 -2 -17 9 95.7 3.35
 -2 17 8 -0.06 0.7
 2 17 -8 -0.55 0.93
 2 17 -8 0.09 1.18
 2 -17 -8 0.29 0.58
 -2 -17 8 0.68 0.81
 -2 -17 8 -0.69 1.35
 -2 17 7 16.55 1.22
 2 17 -7 17.31 1.26
 2 17 -7 19.28 1.33
 2 -17 -7 18.68 0.95
 -2 -17 7 17.11 1.21
 -2 -17 7 19.22 1.54
 -2 17 6 27.77 1.76
 -2 17 6 36 1.34
 2 17 -6 24.8 2.13
 2 17 -6 31.66 1.98
 2 -17 -6 31.58 1.52
 -2 -17 6 30.97 1.89
 -2 17 5 6.12 0.66
 -2 17 5 6.46 0.62
 2 17 -5 6.15 0.74
 2 17 -5 5.79 0.77
 2 -17 -5 6.63 0.57
 2 -17 -5 3.6 0.48
 -2 -17 5 5.7 0.61
 -2 -17 5 5.07 0.75
 -2 17 4 15.82 0.87
 2 17 -4 13.9 1.05
 2 17 -4 16.72 1.13
 2 -17 -4 16.75 0.83
 -2 -17 4 16.01 0.86
 -2 -17 4 16.34 1.11
 -2 17 3 2.61 0.6
 -2 17 3 1.75 0.61
 2 17 -3 2.48 0.97
 2 17 -3 -0.06 0.79
 2 -17 -3 1.88 0.58
 2 -17 -3 1.72 0.62
 -2 -17 3 1.35 0.67
 -2 -17 3 0.39 0.86
 -2 17 2 99.2 3.41
 -2 17 2 98.42 3.24
 2 17 -2 104.66 4.14
 2 17 -2 94.63 3.33
 2 -17 -2 102.02 3.25
 2 -17 -2 96.73 3.75
 -2 -17 2 101.09 3.56
 -2 -17 2 101.32 3.45
 -2 17 1 2.75 0.77
 -2 17 1 1.74 0.71
 2 17 -1 1.66 0.71
 2 17 -1 2.44 0.69
 2 -17 -1 2.33 0.6
 2 -17 -1 1.14 0.53
 -2 -17 1 1.92 0.59
 -2 -17 1 2.36 0.74
 -2 17 0 1.89 0.77
 -2 17 0 1.94 0.58
 2 17 0 1.47 0.8
 2 17 0 1.92 0.71
 2 -17 0 1.6 0.47
 2 -17 0 2.09 0.79
 -2 -17 0 1.97 0.53
 -2 17 -1 3.4 0.83
 -2 17 -1 4.08 0.55
 2 17 1 3.86 0.77
 2 -17 1 4.53 0.84
 -2 -17 -1 3.08 0.57
 -2 17 -2 9.62 1.12
 2 17 2 6.96 0.87
 2 -17 2 9.21 0.84
 2 -17 2 8.56 0.96
 -2 -17 -2 8.56 0.82
 -2 17 -3 49.34 1.76
 -2 17 -3 48.2 1.93
 2 17 3 44.63 2.2
 2 -17 3 46.48 1.81
 2 -17 3 45.52 2
 -2 -17 -3 47.92 1.94
 -2 17 -4 -0.5 0.59
 -2 17 -4 0.39 0.66
 2 17 4 0.84 0.7
 2 -17 4 0.49 0.6
 2 -17 4 0.03 0.48
 -2 -17 -4 0.85 0.85
 -2 17 -5 8.59 0.81
 2 17 5 8.31 0.85
 -2 -17 -5 8.31 1.13
 -2 17 -6 3.01 0.87
 -2 17 -6 2.15 0.59
 2 17 6 2.35 0.9
 -2 -17 -6 2.11 1.04
 -2 17 -7 17.12 1.25
 -2 17 -7 18.08 1.11
 2 17 7 17.18 1.43
 2 -17 7 17.27 0.85
 2 -17 7 16.99 1.27
 -2 -17 -7 16.44 1.44
 -2 17 -8 2.56 1.26
 -2 17 -8 4.68 1.18
 2 17 8 0.71 1.14
 2 -17 8 3.28 1.31
 2 -17 8 0.77 1.18
 -2 17 -9 36.04 1.59
 2 17 9 33.85 2.14
 2 -17 9 35.35 1.64
 2 18 -7 1.82 1
 -2 -18 7 1.26 1.13
 -2 18 6 13.17 1.27
 2 18 -6 14.51 1.35
 2 -18 -6 15.46 1.04
 -2 -18 6 12.89 1.53
 -2 18 5 4.33 0.53
 2 18 -5 3.11 0.84
 2 18 -5 3.35 0.85
 -2 -18 5 3.68 0.49
 -2 -18 5 3.08 0.96
 -2 18 4 1.52 0.48
 2 18 -4 1.45 0.8
 2 18 -4 1.01 0.73
 2 -18 -4 2.09 0.57
 -2 -18 4 1.28 0.45
 -2 -18 4 1.9 0.85
 -2 18 3 0.55 0.93
 2 18 -3 -0.69 0.95
 2 -18 -3 0.07 0.63
 2 -18 -3 -0.68 0.67
 -2 -18 3 -1.22 0.94
 -2 18 2 0.35 0.56
 -2 18 2 -0.18 0.84
 2 18 -2 0 0.84
 2 -18 -2 -0.06 0.73
 2 -18 -2 0.63 0.62
 -2 -18 2 -0.46 0.66
 -2 18 1 53.2 2.26
 -2 18 1 52.25 2.03
 2 18 -1 54.17 2.17
 2 18 -1 50.81 1.97
 2 -18 -1 54.07 2.03
 2 -18 -1 49.32 1.96
 -2 -18 1 46.24 2.02
 -2 -18 1 47.9 2.22
 -2 18 0 6.17 1.17
 -2 18 0 5.95 0.9
 2 18 0 6.74 1.02
 2 18 0 6.43 0.91
 2 -18 0 6.09 0.88
 2 -18 0 8.04 1.21
 -2 -18 0 5.49 0.67
 -2 18 -1 34.18 2.25
 -2 18 -1 35.38 1.5
 2 18 1 32.25 2.04
 2 18 1 34.69 1.61
 2 -18 1 38.88 1.45
 2 -18 1 34.88 1.98
 -2 -18 -1 39.68 1.65
 2 18 2 54.17 2.12
 2 18 2 50.73 1.99
 2 -18 2 53.92 1.98
 2 -18 2 48.89 2.16
 -2 -18 -2 52.41 2.15
 -2 18 -3 146.91 4.91
 -2 18 -3 148.92 4.96
 2 18 3 153.13 5.52
 2 18 3 152.95 5.19
 2 -18 3 152.38 4.98
 2 -18 3 151.87 5.34
 -2 -18 -3 163.95 5.88
 -2 18 -4 12.67 1.09
 -2 18 -4 16.43 0.92
 2 18 4 15.4 1.12
 2 -18 4 16.82 0.84
 -2 -18 -4 14.26 1.31
 -2 18 -5 1.18 0.67
 2 18 5 0.48 0.82
 -2 -18 -5 0.16 1.06
 -2 18 -6 4.85 0.83
 2 18 6 3.97 0.97
 2 -18 6 5.28 0.7
 -2 -18 -6 4.02 1.14
 -2 18 -7 62.33 2.76
 2 18 7 62.24 2.62
 2 -18 7 63.77 2.58
 -2 -18 -7 63.26 2.89
 -2 19 4 1.26 0.82
 2 -19 -4 0.55 0.66
 -2 19 3 21.1 1.2
 2 -19 -3 18.81 1.33
 -2 -19 3 20.76 1.13
 -2 19 2 6.06 0.89
 -2 19 2 6.32 0.72
 2 19 -2 6.12 1.03
 2 19 -2 5.96 1.01
 2 -19 -2 7.46 0.91
 2 -19 -2 5.82 0.69
 -2 -19 2 4.42 0.65
 -2 -19 2 5.77 1.02
 -2 19 1 13.82 1.46
 -2 19 1 16.23 1.18
 2 19 -1 16.31 1.05
 2 -19 -1 19.72 1.3
 2 -19 -1 15.66 1.02
 -2 -19 1 11.16 1.15
 -2 -19 1 16.62 1.29
 -2 19 0 -0.75 1.06
 -2 19 0 0.97 0.78
 2 19 0 -0.83 0.87
 2 -19 0 0.78 0.79
 2 -19 0 0.38 0.84
 -2 -19 0 0.06 0.78
 -2 -19 0 2.15 1.04
 -2 19 -1 69.66 2.83
 -2 19 -1 57.56 2.69
 2 19 1 67.95 2.61
 2 19 1 66.45 2.73
 2 -19 1 60.88 2.45
 2 -19 1 69.52 2.75
 -2 -19 -1 63.23 2.69
 -2 -19 -1 72.45 2.45
 -2 19 -2 8.2 1.9
 -2 19 -2 5.34 1.43
 2 19 2 5.55 1.02
 2 19 2 6.59 0.94
 -2 -19 -2 7.8 1.01
 -2 19 -3 15.44 1.27
 -2 19 -3 19.83 1.09
 2 19 3 18.86 1.37
 2 -19 3 18.38 0.94
 2 -19 3 18.64 1.22
 -2 -19 -3 21.23 1.47
 2 19 4 4.19 0.96
 -2 -19 -4 3.28 1.23
 -3 0 17 227.38 7.14
 -3 0 17 224.25 7.3
 3 0 -17 229.79 7.53
 -3 0 16 41.12 1.65
 -3 0 16 36.45 2.02
 3 0 -16 42.79 2.52
 -3 0 15 2.55 0.55
 -3 0 15 2.56 0.63
 3 0 -15 3.37 0.64
 -3 0 14 2.13 0.27
 3 0 -14 1.71 0.5
 3 0 -14 1.62 0.52
 -3 0 13 5.35 0.4
 -3 0 13 4.89 0.47
 3 0 -13 5.47 0.55
 3 0 -13 6.24 0.6
 -3 0 12 51.57 1.69
 -3 0 12 50.2 1.94
 3 0 -12 50.64 1.73
 3 0 -12 45.68 2.22
 -3 0 11 50.31 1.72
 -3 0 11 49.44 1.87
 3 0 -11 51.64 2.1
 3 0 -11 53.37 2.27
 -3 0 10 112.16 3.76
 -3 0 10 113.82 3.89
 3 0 -10 114.65 3.82
 3 0 -10 122.22 4.37
 -3 0 9 66.69 2.26
 -3 0 9 68.75 2.39
 3 0 -9 67.45 2.3
 3 0 -9 67.29 2.48
 -3 0 8 19.93 0.81
 -3 0 8 19.54 0.86
 3 0 -8 20.47 0.9
 3 0 -7 22.07 0.94
 3 0 -7 21.86 0.92
 -3 0 6 74.28 2.48
 -3 0 6 72.92 2.48
 3 0 -6 70.85 2.39
 3 0 -6 73.86 2.61
 -3 0 5 520.92 15.33
 -3 0 5 439.07 15.05
 3 0 -5 458.14 14.94
 3 0 -5 519.51 15.25
 -3 0 4 966.91 30.16
 -3 0 4 966.06 30.77
 3 0 -4 992.95 30.98
 3 0 -4 957.3 30.6
 -3 0 3 324.13 10.3
 -3 0 3 345.09 11.07
 3 0 -3 355.29 11.13
 3 0 -3 320.87 10.48
 -3 0 2 29.69 1.04
 -3 0 2 29.33 1.11
 3 0 -2 31.12 1.21
 3 0 -2 29.01 1.09
 -3 0 1 3.56 0.3
 -3 0 1 3.33 0.38
 3 0 -1 3.62 0.37
 3 0 -1 3.21 0.41
 -3 0 0 25.31 1.04
 -3 0 0 23.59 0.96
 3 0 0 24.96 1.01
 3 0 0 25.36 1.13
 -3 0 -1 64.04 2.27
 -3 0 -1 67.11 2.22
 3 0 1 67.73 2.24
 3 0 1 63.58 2.37
 -3 0 -2 58.91 2.1
 3 0 2 70.61 2.52
 3 0 2 56.32 2.18
 -3 0 -3 34.5 1.29
 -3 0 -3 35.67 1.39
 3 0 3 35.34 1.23
 3 0 3 33.58 1.3
 -3 0 -4 20.62 0.86
 -3 0 -4 19.21 0.79
 3 0 4 20.44 0.92
 3 0 4 17.61 0.87
 -3 0 -5 275.26 9.02
 -3 0 -5 277.51 8.83
 3 0 5 279.81 8.98
 3 0 5 260.43 8.37
 -3 0 -6 96.54 3.46
 -3 0 -6 106.83 3.81
 3 0 6 101.08 3.47
 3 0 6 95.55 3.41
 -3 0 -7 35.53 1.3
 -3 0 -7 32.78 1.15
 3 0 7 33.73 1.2
 3 0 7 34.32 1.25
 -3 0 -8 6.51 0.4
 -3 0 -8 5.69 0.32
 3 0 8 5.93 0.35
 3 0 8 5.72 0.43
 -3 0 -9 358.57 11.02
 -3 0 -9 337.08 10.97
 3 0 9 357.65 11.12
 3 0 9 329.59 10.75
 -3 0 -10 23.18 0.97
 -3 0 -10 22.85 0.86
 3 0 10 24.18 0.91
 3 0 10 23.33 0.91
 3 0 11 26.87 0.92
 3 0 11 28.95 0.91
 3 1 -17 10.63 0.93
 3 1 -17 11.49 0.96
 3 -1 -17 12.16 1.54
 -3 -1 17 10.3 0.92
 -3 1 16 42.11 1.4
 -3 1 16 36.69 1.93
 3 1 -16 44.87 1.82
 3 1 -16 40.99 1.94
 -3 -1 16 37.17 1.92
 -3 1 15 20.37 1.21
 3 1 -15 19.86 1
 3 1 -15 22.07 1.3
 3 -1 -15 16.21 0.89
 -3 -1 15 19.65 0.89
 -3 -1 15 16.32 0.92
 -3 1 14 26.05 1.05
 -3 1 14 26.56 1.21
 3 1 -14 26.17 1.38
 3 1 -14 24.1 1.1
 3 -1 -14 19.81 1.32
 -3 -1 14 28.61 1.01
 -3 -1 14 23.9 1.17
 -3 1 13 36.61 1.26
 -3 1 13 33.19 1.34
 3 1 -13 33.47 1.59
 3 1 -13 35.7 1.42
 3 -1 -13 34.96 1.3
 3 -1 -13 32.93 1.5
 -3 -1 13 36.28 1.28
 -3 -1 13 31.56 1.58
 -3 1 12 54.54 1.92
 -3 1 12 57.72 2.09
 3 1 -12 51.69 2.3
 3 1 -12 61 2.12
 3 -1 -12 54.51 2.02
 3 -1 -12 61.89 2.55
 -3 -1 12 54.22 1.9
 -3 -1 12 57.66 1.94
 -3 1 11 7.53 0.61
 -3 1 11 9.66 0.57
 3 1 -11 10.7 0.57
 3 1 -11 10.27 0.58
 3 -1 -11 10.02 0.49
 3 -1 -11 9.55 0.71
 -3 -1 11 10.13 0.48
 -3 -1 11 9.9 0.6
 -3 1 10 97.33 3.23
 -3 1 10 100.26 3.17
 3 1 -10 100.07 3.38
 3 1 -10 94.72 3.43
 3 -1 -10 96.57 3.13
 3 -1 -10 97.77 3.39
 -3 -1 10 98.97 3.24
 -3 -1 10 93.86 3.29
 -3 1 9 1.11 0.29
 -3 1 9 0.89 0.27
 3 1 -9 0.89 0.34
 3 1 -9 0.92 0.47
 3 -1 -9 0.6 0.34
 3 -1 -9 1.42 0.32
 -3 -1 9 1.06 0.29
 -3 -1 9 0.9 0.36
 -3 1 8 23.86 0.88
 3 -1 -8 22.04 0.97
 -3 -1 8 20.19 0.95
 -3 -1 8 23.05 0.95
 3 1 -7 1.98 0.35
 3 1 -7 0.58 0.32
 -3 -1 7 2.14 0.35
 -3 1 6 69.59 2.34
 -3 1 6 69.14 2.5
 3 1 -6 68.43 2.33
 3 1 -6 68.43 2.53
 3 -1 -6 67.51 2.29
 3 -1 -6 66.59 2.32
 -3 -1 6 69.22 2.55
 -3 -1 6 64.55 2.4
 -3 1 5 190.64 6.07
 -3 1 5 199.83 6.38
 3 1 -5 190.84 6.22
 3 1 -5 188.39 6.26
 3 -1 -5 209.31 6.53
 3 -1 -5 194.52 6.11
 -3 -1 5 198.43 6.26
 -3 -1 5 193.43 6.28
 -3 1 4 30.56 1.13
 -3 1 4 32.14 1.21
 3 1 -4 29.52 1.09
 3 1 -4 32.45 1.28
 3 -1 -4 33.41 1.36
 3 -1 -4 30.25 1.16
 -3 -1 4 31.85 1.26
 -3 -1 4 28.5 1.14
 -3 1 3 35.6 1.26
 3 1 -3 30.5 1.21
 3 1 -3 35.3 1.47
 3 -1 -3 40.84 1.61
 3 -1 -3 36.39 1.52
 -3 -1 3 32.05 1.28
 -3 -1 3 31.69 1.25
 -3 1 2 146.66 5.03
 -3 1 2 158.19 5.17
 3 1 -2 169.81 5.51
 3 1 -2 165.34 5.6
 3 -1 -2 160.36 5.34
 3 -1 -2 150.86 5.12
 -3 -1 2 170.7 5.56
 -3 -1 2 171.95 5.69
 -3 1 1 6.8 0.4
 -3 1 1 6.45 0.47
 3 1 -1 6.79 0.56
 3 1 -1 7 0.64
 3 -1 -1 6.88 0.44
 3 -1 -1 6.1 0.44
 -3 -1 1 7.51 0.49
 -3 -1 1 7.66 0.71
 -3 1 0 0.25 0.34
 -3 1 0 -0.15 0.32
 3 1 0 0.32 0.27
 3 1 0 0.01 0.36
 3 -1 0 -0.1 0.24
 3 -1 0 0.13 0.41
 -3 -1 0 0.09 0.25
 -3 -1 0 0.29 0.31
 -3 1 -1 5.47 0.42
 -3 1 -1 6.43 0.47
 3 1 1 5.08 0.36
 3 1 1 5.43 0.44
 3 -1 1 5.49 0.38
 3 -1 1 6.36 0.67
 -3 -1 -1 5.18 0.37
 -3 -1 -1 4.77 0.4
 -3 1 -2 56.15 1.99
 -3 1 -2 54.71 2.13
 3 1 2 51.58 1.88
 3 1 2 50.58 1.9
 3 -1 2 53.03 1.8
 3 -1 2 50.12 2.34
 -3 -1 -2 49.16 1.78
 -3 -1 -2 52.4 1.82
 -3 1 -3 169.68 5.65
 -3 1 -3 166.97 5.82
 3 1 3 178.14 5.62
 3 1 3 162.76 5.35
 3 -1 3 179.59 5.83
 3 -1 3 168.01 5.79
 -3 -1 -3 177.51 5.54
 -3 -1 -3 175.17 5.81
 -3 1 -4 1.5 0.59
 3 1 4 3.34 0.29
 3 1 4 2.27 0.36
 3 -1 4 1.35 0.79
 3 -1 4 0.97 0.36
 -3 -1 -4 2.15 0.35
 -3 -1 -4 2.19 0.39
 -3 1 -5 107.37 3.57
 -3 1 -5 102.97 3.52
 3 1 5 103.76 3.4
 3 -1 5 103.93 3.67
 3 -1 5 104.52 3.71
 -3 -1 -5 101.3 3.53
 -3 1 -6 2.83 0.26
 -3 1 -6 2.34 0.24
 3 1 6 2.74 0.26
 3 1 6 2.82 0.28
 3 -1 6 2.22 0.23
 3 -1 6 3.06 0.4
 -3 -1 -6 3.1 0.26
 -3 -1 -6 2.68 0.3
 -3 1 -7 32.69 1.22
 -3 1 -7 34.27 1.23
 3 1 7 34.31 1.26
 3 1 7 30.86 1.2
 3 -1 7 35.57 1.2
 3 -1 7 31.07 1.28
 -3 -1 -7 32.21 1.3
 -3 -1 -7 31.45 1.21
 -3 1 -8 316.75 10.03
 -3 1 -8 317.97 10.05
 3 1 8 328.3 10.24
 3 1 8 306 10.21
 3 -1 8 331.57 9.99
 3 -1 8 321.15 10.17
 -3 -1 -8 325.12 10.57
 -3 -1 -8 312.27 9.82
 -3 1 -9 66.74 2.3
 -3 1 -9 64.05 2.29
 3 1 9 66.97 2.22
 3 1 9 61.39 2.12
 3 -1 9 69.68 2.27
 3 -1 9 64.63 2.29
 -3 -1 -9 67.22 2.38
 -3 1 -10 163.51 5.25
 -3 1 -10 175.64 5.25
 3 1 10 157.14 4.95
 3 1 10 142.9 4.96
 3 -1 10 161.92 5.31
 3 -1 10 156.04 5.27
 -3 -1 -10 164.16 5.06
 -3 -1 -10 161.12 5.02
 -3 1 -11 3.01 0.26
 -3 1 -11 2.55 0.29
 3 -1 11 3.07 0.3
 3 -1 11 1.86 0.27
 -3 1 -12 90.96 2.83
 3 -1 12 83.74 2.79
 -3 2 17 33.84 1.15
 3 2 -17 28.13 1.45
 3 2 -16 4.6 0.72
 -3 -2 16 5.85 0.63
 -3 2 15 0.86 0.51
 -3 2 15 0.71 0.27
 3 2 -15 0.34 0.32
 3 2 -15 1 0.65
 -3 -2 15 0.81 0.36
 -3 -2 15 0.27 0.45
 -3 2 14 10.8 0.72
 -3 2 14 10.98 0.64
 3 2 -14 10.29 0.59
 3 2 -14 11.49 0.88
 -3 -2 14 11.74 0.59
 -3 -2 14 8.78 0.68
 -3 2 13 203.04 6.36
 -3 2 13 196.36 6.15
 3 2 -13 196.09 6.22
 3 2 -13 202.16 6.21
 3 -2 -13 200.52 6.33
 -3 -2 13 195.76 6.16
 -3 -2 13 175.86 6.47
 -3 2 12 52.24 2.07
 -3 2 12 59.97 2.1
 3 2 -12 60.61 2.36
 3 2 -12 60.35 2.05
 3 -2 -12 58.43 2.05
 3 -2 -12 64.3 2.3
 -3 -2 12 60.71 2.02
 -3 -2 12 56.42 2.32
 -3 2 11 29.12 1.11
 -3 2 11 27.64 1.35
 3 2 -11 25.45 1.06
 3 2 -11 26.03 1.16
 3 -2 -11 25.5 1.31
 3 -2 -11 26.67 1.15
 -3 -2 11 23.94 1.2
 -3 -2 11 23.3 1.05
 -3 2 10 2.91 0.37
 -3 2 10 1.54 0.4
 3 2 -10 1.56 0.37
 3 2 -10 1.08 0.51
 3 -2 -10 1.39 0.39
 3 -2 -10 1.6 0.77
 -3 -2 10 1.46 0.29
 -3 -2 10 2.59 0.38
 -3 2 9 11.6 0.56
 -3 2 9 10.94 0.62
 3 2 -9 14.35 0.67
 3 2 -9 12.31 0.62
 3 -2 -9 10.4 0.62
 3 -2 -9 11.92 0.71
 -3 -2 9 13.27 0.56
 -3 -2 9 11.21 0.74
 -3 2 8 100.68 3.34
 -3 2 8 99.59 3.31
 3 2 -8 92.99 3.79
 3 2 -8 100.98 3.61
 3 -2 -8 97.84 3.27
 3 -2 -8 98.31 3.32
 -3 2 7 2.29 0.28
 -3 2 7 2.07 0.37
 3 2 -7 2.13 0.28
 3 2 -7 1.37 0.34
 -3 -2 7 2.39 0.27
 -3 -2 7 2.29 0.41
 3 2 -6 3.79 0.44
 3 2 -6 3.44 0.47
 3 -2 -6 5.17 0.81
 -3 -2 6 3.77 0.38
 -3 -2 6 3.97 0.48
 -3 2 5 278.54 9.11
 -3 2 5 284.86 9.29
 3 2 -5 294.28 9.18
 3 2 -5 285.54 9.15
 3 -2 -5 289.88 9.76
 3 -2 -5 276.06 9.04
 -3 -2 5 290.14 9.16
 -3 -2 5 296.35 9.47
 -3 2 4 88.89 3.11
 -3 2 4 89.6 3.27
 3 2 -4 109.79 3.53
 3 2 -4 103.82 3.42
 3 -2 -4 93.71 3.18
 3 -2 -4 90.25 3.18
 -3 -2 4 103.86 3.39
 -3 -2 4 113.71 3.82
 -3 2 3 42.51 1.66
 -3 2 3 37.47 1.49
 3 2 -3 47.13 1.88
 3 2 -3 44.99 1.97
 3 -2 -3 38.72 1.56
 3 -2 -3 40.73 1.81
 -3 -2 3 47.02 1.85
 -3 -2 3 50.63 2.18
 -3 2 2 86.68 3.23
 -3 2 2 89.28 3.04
 3 2 -2 86.23 2.84
 3 2 -2 84.82 2.92
 3 -2 -2 86.85 2.99
 3 -2 -2 93.21 3.44
 -3 -2 2 80.37 2.81
 3 2 -1 119.26 3.86
 3 2 -1 121.3 3.92
 3 -2 -1 121.87 3.95
 -3 -2 1 126.26 3.95
 -3 -2 1 115.23 3.91
 -3 2 0 110.51 3.81
 -3 2 0 120.01 4.05
 3 2 0 110.8 3.55
 3 2 0 108.22 3.71
 3 -2 0 117.01 3.77
 3 -2 0 116.31 4.16
 -3 -2 0 110.16 3.7
 -3 -2 0 108.92 3.63
 -3 2 -1 220.48 6.95
 -3 2 -1 211.79 7
 3 2 1 238.25 7.34
 3 2 1 210.73 7.08
 3 -2 1 212.44 6.96
 3 -2 1 215 6.98
 -3 -2 -1 235.3 7.21
 -3 -2 -1 227.68 7.38
 -3 2 -2 109.38 3.72
 -3 2 -2 115.82 3.86
 3 2 2 118.33 3.88
 3 2 2 111.64 3.89
 3 -2 2 118.75 4.11
 3 -2 2 108.71 3.65
 -3 -2 -2 116.21 3.85
 -3 -2 -2 120.12 3.71
 -3 2 -3 11 0.56
 -3 2 -3 12.51 0.6
 3 2 3 10.68 0.49
 3 2 3 10.37 0.53
 3 -2 3 11.38 0.58
 3 -2 3 11.76 0.66
 -3 -2 -3 11.05 0.5
 -3 -2 -3 10.55 0.53
 -3 2 -4 16.56 0.75
 -3 2 -4 16.92 0.77
 3 2 4 16.05 0.67
 3 2 4 15.38 0.69
 3 -2 4 15.45 0.67
 3 -2 4 16.79 0.91
 -3 -2 -4 16.3 0.68
 -3 -2 -4 15.92 0.75
 3 2 5 0.66 0.27
 3 2 5 0.3 0.44
 -3 -2 -5 0.23 0.35
 -3 -2 -5 0.28 0.32
 -3 2 -6 35.76 1.31
 -3 2 -6 33.13 1.29
 3 -2 6 35.43 1.26
 3 -2 6 34.71 1.43
 -3 2 -7 86.99 2.97
 -3 2 -7 84.52 2.75
 3 2 7 94.12 3.09
 3 2 7 84.97 2.99
 3 -2 7 83.4 2.76
 3 -2 7 88.26 3.12
 -3 -2 -7 81.71 2.82
 -3 -2 -7 89.07 2.92
 -3 2 -8 34.71 1.26
 -3 2 -8 37.06 1.31
 3 2 8 33.36 1.23
 3 2 8 32.75 1.15
 3 -2 8 33.89 1.28
 3 -2 8 33.88 1.34
 -3 -2 -8 30.53 1.16
 -3 -2 -8 34.31 1.22
 -3 2 -9 217.84 7.21
 -3 2 -9 219.58 6.99
 3 2 9 222.46 6.84
 3 2 9 214.77 6.8
 3 -2 9 228.58 7.06
 3 -2 9 206.33 7.2
 -3 -2 -9 216.39 6.93
 -3 2 -10 16.79 1.07
 3 -2 10 18 0.94
 -3 2 -11 4.28 0.43
 3 -2 12 36.18 1.39
 3 3 -17 4.31 1.04
 3 -3 -17 6.82 0.73
 -3 3 16 13.41 1.2
 3 3 -16 14.3 1.22
 3 3 -16 14.16 1.38
 3 -3 -16 19.14 0.95
 -3 3 15 88.8 3.07
 -3 3 15 75.27 3.06
 3 3 -15 81.04 3.02
 3 3 -15 82.58 3.01
 3 -3 -15 89.38 3.01
 3 -3 -15 90.68 2.97
 -3 -3 15 91.19 2.89
 -3 3 14 5.46 0.85
 3 3 -14 6.39 0.67
 3 3 -14 5.71 0.68
 3 -3 -14 7.44 1.04
 3 -3 -14 7.09 0.77
 -3 -3 14 5.65 0.44
 -3 -3 14 6.27 0.83
 -3 3 13 4.37 0.5
 -3 3 13 3.89 0.49
 3 3 -13 2.95 0.49
 3 3 -13 3.86 0.45
 3 -3 -13 2.5 0.46
 -3 -3 13 3.24 0.5
 -3 3 12 12.41 0.61
 -3 3 12 12.25 0.6
 3 3 -12 10.05 0.74
 3 3 -12 12.02 0.8
 3 -3 -12 10.73 0.77
 -3 -3 12 9.9 0.72
 -3 3 11 35.9 1.33
 -3 3 11 34.23 1.47
 3 3 -11 44.24 1.51
 3 3 -11 44.57 1.66
 3 -3 -11 37.02 1.47
 -3 -3 11 38.77 1.3
 -3 3 10 39.61 1.43
 -3 3 10 39.57 1.56
 3 3 -10 44.39 1.76
 3 3 -10 44.13 1.65
 3 -3 -10 39.93 1.82
 -3 -3 10 42.49 1.62
 -3 -3 10 40.85 1.83
 -3 3 9 13.15 0.67
 3 -3 -9 14.16 0.87
 3 -3 -9 12.68 0.74
 -3 -3 9 12.42 0.92
 -3 -3 9 13.9 1.14
 -3 3 8 29.37 1.06
 -3 3 8 28.02 1.16
 3 3 -8 30.01 1.43
 3 3 -8 28.24 1.22
 3 -3 -8 27.48 1.16
 3 -3 -8 27.05 1.06
 -3 3 7 0.45 0.3
 -3 3 7 0.46 0.31
 3 3 -7 0.28 0.35
 3 3 -7 0.61 0.46
 3 -3 -7 0.4 0.46
 -3 -3 7 0.64 0.21
 -3 -3 7 0.65 0.42
 3 3 -6 2.1 0.62
 3 3 -6 2.14 0.37
 3 -3 -6 3.13 0.4
 3 -3 -6 2.73 0.46
 -3 -3 6 2.96 0.34
 -3 -3 6 2.03 0.67
 -3 3 5 430.18 13.58
 -3 3 5 413.42 13.18
 3 3 -5 424.32 13.77
 3 3 -5 429.42 13.24
 3 -3 -5 429.73 13.17
 3 -3 -5 427.69 13.97
 -3 -3 5 423.31 13.14
 -3 -3 5 423.88 14.08
 -3 3 4 96.14 3.37
 -3 3 4 96.15 3.29
 3 3 -4 107.68 4.18
 3 3 -4 92.85 3.21
 3 -3 -4 98.61 3.29
 3 -3 -4 99.74 3.7
 -3 -3 4 94.76 3.18
 -3 -3 4 106.05 4.4
 -3 3 3 1.34 0.29
 -3 3 3 1.32 0.36
 3 3 -3 1.32 0.47
 3 3 -3 0.48 0.46
 3 -3 -3 1.6 0.39
 3 -3 -3 1.92 0.51
 -3 -3 3 1.31 0.27
 -3 -3 3 1.39 0.51
 -3 3 2 1.2 0.34
 -3 3 2 0.87 0.42
 3 3 -2 1.37 0.32
 3 3 -2 0.88 0.49
 3 -3 -2 1.29 0.39
 3 -3 -2 1.21 0.48
 -3 -3 2 0.74 0.29
 -3 -3 2 1.35 0.46
 -3 3 1 105.28 3.44
 -3 3 1 112.45 3.91
 3 3 -1 112.33 3.65
 3 3 -1 111.6 4.02
 3 -3 -1 114.65 3.69
 3 -3 -1 105.04 3.49
 -3 -3 1 111.73 3.7
 -3 -3 1 116.34 3.81
 -3 3 0 142.82 4.75
 -3 3 0 136.17 4.55
 3 3 0 152.35 4.6
 3 3 0 145.22 5.02
 3 -3 0 139.76 4.5
 3 -3 0 140.93 4.87
 -3 -3 0 144.62 4.74
 -3 -3 0 143.61 4.69
 -3 3 -1 79.03 2.89
 3 3 1 66.02 2.19
 3 3 1 67.39 2.53
 3 -3 1 64.89 2.4
 -3 -3 -1 65.12 2.29
 -3 -3 -1 61.79 2.21
 -3 3 -2 58.18 2.29
 3 3 2 64.6 2.35
 3 3 2 58.15 2.2
 -3 -3 -2 57.42 2
 -3 -3 -2 58.54 2.33
 -3 3 -3 202.92 6.88
 -3 3 -3 205.03 6.65
 3 3 3 208.07 6.63
 3 3 3 193.94 6.44
 3 -3 3 209.21 6.38
 3 -3 3 196.04 7.19
 -3 -3 -3 202.92 6.47
 -3 -3 -3 198.68 6.32
 -3 3 -4 2.2 0.27
 -3 3 -4 2.01 0.34
 3 3 4 3.24 0.4
 3 3 4 2.02 0.28
 3 -3 4 2.08 0.48
 3 -3 4 2.23 0.53
 -3 -3 -4 2.4 0.31
 -3 -3 -4 1.82 0.48
 -3 3 -5 45.44 1.59
 -3 3 -5 40.13 1.52
 3 3 5 46.61 1.56
 3 3 5 44.93 1.77
 3 -3 5 46.91 1.55
 3 -3 5 45.05 1.77
 -3 -3 -5 41.71 1.67
 -3 -3 -5 46.31 1.7
 -3 3 -6 386.73 11.71
 -3 3 -6 389.36 11.92
 3 3 6 351.36 11.7
 3 -3 6 397.84 11.91
 3 -3 6 375.07 12.07
 -3 -3 -6 335.8 11.36
 -3 -3 -6 332.34 11.37
 -3 3 -7 23.65 1.06
 -3 3 -7 18.06 0.72
 3 3 7 21.88 0.84
 3 3 7 20.09 0.82
 3 -3 7 19.95 0.78
 3 -3 7 19.97 0.84
 -3 -3 -7 18.66 0.79
 -3 -3 -7 16.98 0.78
 -3 3 -8 50.81 1.96
 -3 3 -8 48.39 1.76
 3 3 8 45.26 1.62
 3 3 8 44.16 1.52
 3 -3 8 50.12 1.95
 3 -3 8 45.01 1.79
 -3 -3 -8 42.48 1.55
 -3 -3 -8 41.72 1.52
 -3 3 -9 66.05 2.43
 -3 3 -9 64.6 2.1
 3 -3 9 70.55 2.19
 -3 -3 -9 57.94 1.96
 -3 -3 -9 62.11 2
 -3 3 -10 28.38 1.21
 -3 3 -10 27.98 1.32
 3 -3 10 30.56 1.14
 3 -3 10 27.33 1.24
 -3 3 -11 4.05 0.78
 -3 3 -13 1.24 0.39
 3 -3 13 1.01 0.32
 -3 4 16 83.31 2.81
 3 4 -16 76.21 2.77
 3 4 -16 69.45 2.96
 -3 4 15 0.16 0.48
 -3 4 15 0.43 0.4
 3 4 -15 -0.36 0.69
 3 4 -15 0.7 0.71
 3 -4 -15 0.04 0.45
 3 -4 -15 0.24 0.68
 -3 -4 15 -0.4 0.56
 -3 -4 15 -0.14 0.81
 -3 4 14 18.49 0.9
 -3 4 14 19.43 0.91
 3 4 -14 18.39 1.18
 3 4 -14 19.44 1
 3 -4 -14 20.17 0.97
 3 -4 -14 18.11 1.09
 -3 -4 14 21.82 1.01
 -3 -4 14 21.02 1.17
 -3 4 13 90.37 3.2
 -3 4 13 88.3 3.13
 3 4 -13 88.83 3.5
 3 4 -13 87.39 2.95
 3 -4 -13 79.02 3.46
 3 -4 -13 87.57 3.04
 -3 -4 13 92.86 3.28
 -3 -4 13 85.63 3.05
 -3 4 12 99.86 3
 -3 4 12 99.15 3.31
 3 4 -12 91.7 3.52
 3 4 -12 82.18 3.35
 3 -4 -12 90.56 3.35
 3 -4 -12 99.23 3.32
 -3 -4 12 86.08 3.06
 -3 -4 12 89.6 3.02
 -3 4 11 8.94 0.51
 -3 4 11 10.22 0.6
 3 4 -11 10.64 0.75
 3 4 -11 10.13 0.75
 3 -4 -11 7.64 0.59
 3 -4 -11 8.31 0.63
 -3 -4 11 9.17 0.63
 -3 -4 11 9.91 0.6
 -3 4 10 70.38 2.54
 -3 4 10 74.14 2.5
 3 4 -10 74.49 2.37
 3 4 -10 71.26 2.5
 3 -4 -10 68.63 2.7
 3 -4 -10 70.65 2.81
 -3 -4 10 71.16 2.36
 -3 -4 10 77.05 2.59
 -3 4 9 -0.14 0.28
 -3 4 9 -0.08 0.34
 3 -4 -9 -0.23 0.3
 3 -4 -9 -0.29 0.43
 -3 -4 9 0.17 0.36
 -3 -4 9 0.56 0.4
 -3 4 8 23.71 0.93
 -3 4 8 23.45 0.97
 3 4 -8 24.83 1
 3 4 -8 23.06 1.15
 3 -4 -8 24.85 1.04
 3 -4 -8 24.57 1.09
 -3 -4 8 27.38 1.08
 -3 4 7 10.77 0.55
 -3 4 7 9.76 0.52
 3 4 -7 9.42 0.57
 3 4 -7 10.35 0.65
 3 -4 -7 9.3 0.57
 3 -4 -7 10.48 0.63
 -3 -4 7 11.1 0.56
 -3 -4 7 10.03 0.66
 -3 4 6 20.35 0.86
 -3 4 6 24.17 0.91
 3 4 -6 19.8 0.82
 3 4 -6 21.29 1.01
 -3 -4 6 22.17 0.93
 -3 -4 6 21.07 0.91
 -3 4 5 147.45 4.95
 -3 4 5 157.8 4.94
 3 4 -5 151.31 5.15
 3 4 -5 159.17 5.19
 3 -4 -5 146.54 4.7
 3 -4 -5 147.09 4.97
 -3 -4 5 149.17 4.84
 -3 -4 5 146.54 4.93
 -3 4 4 121.47 4.06
 -3 4 4 124.26 3.99
 3 4 -4 121.46 4.14
 3 4 -4 120.16 4.09
 3 -4 -4 121.46 3.93
 3 -4 -4 119.84 4.18
 -3 -4 4 121.05 3.98
 -3 -4 4 118.22 4.2
 -3 4 3 203.38 6.47
 -3 4 3 200.87 6.46
 3 -4 -3 207.15 6.53
 3 -4 -3 196.98 6.41
 -3 4 2 45.36 1.68
 -3 4 2 45.28 1.62
 3 4 -2 45.08 1.62
 3 4 -2 43.35 1.56
 3 -4 -2 46.36 1.65
 3 -4 -2 45.08 1.85
 -3 -4 2 43.45 1.54
 -3 -4 2 44.62 1.73
 -3 4 1 37.25 1.43
 -3 4 1 37.25 1.45
 3 4 -1 38.13 1.43
 3 4 -1 36.03 1.37
 3 -4 -1 36.57 1.37
 3 -4 -1 38.3 1.54
 -3 -4 1 33.06 1.31
 -3 -4 1 37.1 1.53
 -3 4 0 18.73 0.85
 -3 4 0 17.93 0.78
 3 4 0 18.34 0.8
 3 4 0 16.96 0.83
 3 -4 0 17.58 0.78
 3 -4 0 19.19 0.95
 -3 -4 0 17.06 0.73
 -3 -4 0 15.88 0.82
 -3 4 -1 99.85 3.39
 -3 4 -1 104.69 3.34
 3 4 1 104.49 3.3
 3 4 1 100.88 3.63
 3 -4 1 102.26 3.42
 3 -4 1 102.49 3.65
 -3 -4 -1 100.78 3.46
 -3 -4 -1 97.13 3.52
 -3 4 -2 64.81 2.25
 -3 4 -2 63.61 2.16
 3 4 2 63.92 2.29
 3 4 2 66.18 2.26
 3 -4 2 69.39 2.14
 3 -4 2 65.68 2.5
 -3 -4 -2 69.22 2.35
 -3 -4 -2 58.46 2.27
 3 4 3 103.54 3.38
 3 4 3 103.92 3.35
 -3 -4 -3 106.64 3.4
 -3 -4 -3 105.48 3.6
 -3 4 -4 146.26 5.36
 -3 4 -4 146.51 4.69
 3 4 4 139.73 4.75
 3 4 4 145.12 4.84
 3 -4 4 144.54 4.69
 3 -4 4 142.63 4.93
 -3 -4 -4 137.52 4.58
 -3 -4 -4 132.33 4.54
 -3 4 -5 94 3.18
 -3 4 -5 95.72 3.12
 3 4 5 100.94 3.19
 3 4 5 94.42 3.23
 3 -4 5 96.46 3.08
 3 -4 5 96.32 3.34
 -3 -4 -5 97.86 3.24
 -3 -4 -5 93.1 3.21
 -3 4 -6 7.06 0.41
 -3 4 -6 8.17 0.43
 3 4 6 8.2 0.44
 3 4 6 8.06 0.43
 3 -4 6 7.75 0.42
 3 -4 6 7.87 0.5
 -3 -4 -6 6.36 0.39
 -3 -4 -6 7.11 0.44
 -3 4 -7 64.16 2.13
 -3 4 -7 65.9 2.09
 3 4 7 66.35 2.31
 3 4 7 61.54 2.2
 3 -4 7 66.33 2.1
 3 -4 7 64.69 2.4
 -3 -4 -7 58.53 2.13
 -3 -4 -7 65.57 2.43
 -3 4 -8 1.08 0.25
 -3 4 -8 1.34 0.25
 3 -4 8 0.89 0.39
 3 -4 8 0.84 0.4
 -3 4 -9 117.6 3.77
 -3 4 -9 114.08 3.67
 3 -4 9 110.41 3.71
 3 -4 9 115.17 3.91
 -3 4 -10 16.99 0.72
 -3 4 -10 15.64 0.88
 3 -4 10 16.54 0.74
 3 -4 10 14.74 0.82
 -3 4 -11 132.61 4.44
 -3 4 -11 138.16 4.43
 3 -4 11 139.47 4.41
 3 -4 11 123.01 4.52
 -3 4 -12 8.2 0.51
 3 -4 12 7.38 0.62
 3 -4 12 6.34 0.79
 -3 4 -13 64.24 2.33
 -3 4 -13 66.89 2.38
 3 -4 13 67.23 2.38
 3 -4 14 1.45 0.45
 -3 5 16 18.69 1.12
 -3 5 16 15.75 1.09
 3 5 -16 18.04 1.32
 3 5 -16 19.11 1.1
 3 -5 -16 19.99 1.12
 -3 -5 16 16.45 1.15
 -3 -5 16 19.6 1.16
 -3 5 15 16.95 1.05
 -3 5 15 13.09 1.13
 3 5 -15 17.08 0.99
 3 5 -15 13.88 1.32
 3 -5 -15 15.84 1.15
 -3 -5 15 16.48 0.9
 -3 -5 15 18.71 1.27
 -3 5 14 -0.06 0.39
 -3 5 14 0.38 0.51
 3 5 -14 -0.19 0.6
 3 5 -14 0.06 0.69
 3 -5 -14 -0.07 0.57
 -3 -5 14 0.31 0.39
 -3 -5 14 0.28 0.67
 -3 5 13 9.63 0.55
 -3 5 13 10.01 0.87
 3 5 -13 11.2 0.73
 3 5 -13 9.52 0.83
 3 -5 -13 9.76 0.57
 3 -5 -13 8.03 0.75
 -3 -5 13 8.67 0.8
 -3 -5 13 9.25 0.63
 -3 5 12 7.14 0.45
 -3 5 12 8.86 0.56
 3 5 -12 9.11 0.7
 3 5 -12 7.81 0.53
 3 -5 -12 6.89 0.52
 -3 -5 12 8.62 0.56
 -3 -5 12 7.29 0.58
 -3 5 11 31.9 1.34
 -3 5 11 32.26 1.24
 3 5 -11 32.73 1.29
 3 5 -11 29.69 1.44
 3 -5 -11 30.37 1.28
 3 -5 -11 31.46 1.44
 -3 -5 11 28.73 1.2
 -3 -5 11 35.87 1.46
 3 5 -10 37.3 1.49
 3 5 -10 34.93 1.55
 -3 -5 10 31.12 1.5
 -3 -5 10 30.8 1.56
 -3 5 9 135.19 4.68
 -3 5 9 139.4 4.52
 3 5 -9 140 4.69
 3 5 -9 130.38 4.62
 3 -5 -9 135.58 4.8
 3 -5 -9 137.2 4.53
 -3 5 8 100.11 3.27
 -3 5 8 104.66 3.43
 3 5 -8 95.51 3.25
 3 5 -8 99.74 3.34
 3 -5 -8 104.64 3.3
 3 -5 -8 102.85 3.29
 -3 -5 8 102.6 3.3
 -3 -5 8 98.64 3.25
 -3 5 7 6.02 0.46
 -3 5 7 6.32 0.45
 3 5 -7 5.73 0.46
 3 5 -7 5.69 0.56
 3 -5 -7 5.91 0.43
 3 -5 -7 6.67 0.55
 -3 -5 7 5.47 0.46
 -3 -5 7 5.65 0.43
 -3 5 6 63.29 2.14
 -3 5 6 62.72 2.23
 3 5 -6 64.12 2.11
 3 5 -6 63.27 2.42
 -3 -5 6 66.89 2.44
 -3 -5 6 63.59 2.14
 3 5 -5 7.88 0.5
 3 5 -5 7.8 0.52
 3 -5 -5 10.14 0.56
 3 -5 -5 8.62 0.59
 -3 -5 5 8.85 0.49
 -3 -5 5 8.49 0.52
 -3 5 4 0.68 0.25
 -3 5 4 0.64 0.35
 3 5 -4 2.27 0.48
 3 -5 -4 0.3 0.31
 3 -5 -4 0.14 0.34
 -3 5 3 36.58 1.35
 -3 5 3 38.17 1.44
 3 5 -3 38.93 1.45
 3 5 -3 37.7 1.36
 3 -5 -3 36.53 1.46
 3 -5 -3 35.07 1.35
 -3 -5 3 40.29 1.39
 -3 -5 3 37.95 1.57
 -3 5 2 54.03 2.01
 -3 5 2 58.17 2.18
 3 5 -2 50.48 1.96
 3 5 -2 50.86 1.83
 3 -5 -2 56.76 2.21
 3 -5 -2 52.67 2.1
 -3 -5 2 49.75 1.79
 -3 -5 2 47.61 1.9
 -3 5 1 0.22 0.32
 -3 5 1 0.45 0.52
 3 5 -1 -0.1 0.29
 3 5 -1 0.27 0.37
 3 -5 -1 -0.05 0.39
 3 -5 -1 -0.19 0.34
 -3 -5 1 -0.07 0.3
 -3 -5 1 0.08 0.35
 -3 5 0 33.06 1.33
 -3 5 0 31.91 1.31
 3 5 0 39.92 1.8
 3 5 0 36.4 1.5
 3 -5 0 32.11 1.31
 3 -5 0 30.81 1.25
 -3 -5 0 41.1 1.67
 -3 -5 0 40.8 1.93
 -3 5 -1 28.98 1.64
 3 5 1 34.99 1.49
 3 5 1 36.29 1.46
 -3 -5 -1 36.2 1.32
 -3 -5 -1 37.9 1.56
 -3 5 -2 412.91 12.95
 -3 5 -2 406.54 13.27
 3 5 2 419.93 13.1
 3 5 2 413.64 13.05
 3 -5 2 416.09 12.98
 3 -5 2 400.39 13.18
 -3 -5 -2 420.39 13.05
 -3 -5 -2 390.08 12.86
 -3 5 -3 -0.25 0.25
 -3 5 -3 0.17 0.37
 3 5 3 0.27 0.25
 3 5 3 0.07 0.31
 3 -5 3 0.62 0.32
 3 -5 3 -0.02 0.32
 -3 -5 -3 -0.02 0.23
 -3 -5 -3 -0.01 0.29
 -3 5 -4 19.14 0.84
 -3 5 -4 16.9 0.69
 3 5 4 17.84 0.68
 3 5 4 16.76 0.75
 3 -5 4 15.82 0.7
 3 -5 4 17.82 0.79
 -3 -5 -4 16.59 0.7
 -3 -5 -4 17.22 0.81
 -3 5 -5 12.88 0.77
 -3 5 -5 12.61 0.7
 3 5 5 10.79 0.53
 3 -5 5 11.85 0.72
 3 -5 5 11.77 0.8
 -3 -5 -5 10.27 0.53
 -3 -5 -5 10.45 0.58
 -3 5 -6 1.39 0.44
 -3 5 -6 0.91 0.26
 3 -5 6 1 0.37
 3 -5 6 0.6 0.46
 -3 5 -7 68.75 2.25
 -3 5 -7 71.59 2.39
 3 5 7 68.04 2.26
 3 5 7 65.28 2.3
 3 -5 7 67.65 2.31
 3 -5 7 66.86 2.54
 -3 -5 -7 68.8 2.15
 -3 -5 -7 68.61 2.34
 -3 5 -8 215.42 6.82
 -3 5 -8 201.9 6.72
 3 5 8 222.47 6.59
 3 -5 8 220.82 6.9
 3 -5 8 213.07 6.95
 -3 -5 -8 221.52 6.63
 -3 -5 -8 204.08 6.71
 -3 5 -9 58.88 2.09
 -3 5 -9 60.09 1.99
 3 -5 9 64.87 2.17
 3 -5 9 61.47 2.29
 -3 5 -10 138.95 4.9
 -3 5 -10 164.57 5.02
 3 -5 10 158.63 5.37
 3 -5 10 144.11 5.26
 -3 5 -11 0.83 0.4
 -3 5 -11 0.93 0.43
 3 -5 11 1.08 0.47
 3 -5 11 0.61 0.64
 -3 5 -12 45.24 1.68
 -3 5 -12 40.2 1.59
 3 -5 12 43.24 1.72
 -3 5 -13 35.58 1.4
 -3 5 -13 32.53 1.45
 3 -5 13 27.82 1.49
 -3 5 -14 6.09 0.78
 3 -5 14 4.68 0.72
 -3 6 16 58.41 2.85
 3 6 -16 74.4 2.53
 3 -6 -16 68.57 2.44
 3 -6 -16 60.34 2.86
 -3 -6 16 59.27 2.84
 -3 6 15 0.9 0.44
 -3 6 15 0.93 0.49
 3 6 -15 0.9 0.68
 3 6 -15 0.68 0.63
 3 -6 -15 0.57 0.49
 3 -6 -15 1.03 0.61
 -3 -6 15 0.24 0.56
 -3 -6 15 0.25 0.72
 -3 6 14 140.07 4.49
 -3 6 14 139.8 4.51
 3 6 -14 138.61 5.3
 3 6 -14 141.11 4.59
 3 -6 -14 144.39 4.6
 3 -6 -14 141.86 4.57
 -3 -6 14 142.37 4.75
 -3 -6 14 141.6 4.74
 3 6 -13 0.59 0.53
 3 6 -13 -0.12 0.61
 3 -6 -13 0.36 0.42
 -3 -6 13 0.21 0.52
 -3 -6 13 0.29 0.6
 -3 6 12 42.54 1.73
 -3 6 12 44.4 1.62
 3 6 -12 50.02 2.13
 3 6 -12 52.17 1.79
 3 -6 -12 43.29 1.93
 3 -6 -12 46.3 2.16
 -3 -6 12 49.17 1.9
 -3 -6 12 41.06 2.32
 -3 6 11 4.52 0.36
 -3 6 11 4.96 0.42
 3 6 -11 3.57 0.55
 3 6 -11 3.93 0.4
 3 -6 -11 4.37 0.43
 3 -6 -11 5.04 0.59
 -3 -6 11 4.85 0.45
 -3 -6 11 3.77 0.59
 -3 6 10 40.04 1.45
 -3 6 10 40.11 1.43
 3 -6 -10 39.02 1.43
 3 -6 -10 41.8 1.49
 -3 -6 10 41.27 1.48
 -3 -6 10 41.03 1.72
 -3 6 9 87.55 3.12
 -3 6 9 91.27 3.07
 3 6 -9 91.85 3.25
 3 6 -9 87.43 3.09
 3 -6 -9 84.3 2.96
 3 -6 -9 92.72 3.12
 -3 -6 9 88.03 2.94
 -3 6 8 45.77 1.85
 -3 6 8 46.81 1.75
 3 6 -8 47.47 2.09
 3 6 -8 46.86 1.68
 3 -6 -8 46.55 1.73
 3 -6 -8 49.06 1.76
 -3 -6 8 46.19 1.62
 -3 -6 8 46.62 2.24
 -3 6 7 21.7 0.95
 -3 6 7 22.84 0.94
 3 6 -7 21.91 0.92
 3 6 -7 21.77 1.08
 3 -6 -7 21.82 0.96
 3 -6 -7 20.93 0.95
 -3 -6 7 21.26 0.89
 -3 -6 7 23.89 1.1
 -3 6 6 43.65 1.58
 -3 6 6 44.78 1.65
 3 -6 -6 48.56 1.71
 3 -6 -6 44.13 1.78
 3 6 -5 6.54 0.58
 3 6 -5 6.45 0.64
 3 -6 -5 4.37 0.56
 3 -6 -5 5.67 0.46
 -3 -6 5 6.58 0.47
 -3 -6 5 5.65 0.7
 -3 6 4 146.19 4.99
 -3 6 4 157.76 5.14
 3 6 -4 150.8 4.98
 3 6 -4 154.15 5.52
 3 -6 -4 158.21 5.04
 3 -6 -4 150.22 4.99
 -3 -6 4 153.73 5.21
 -3 -6 4 155.79 4.98
 -3 6 3 13.22 0.6
 -3 6 3 14.1 0.74
 3 6 -3 11.99 0.59
 3 6 -3 13.32 0.74
 3 -6 -3 11.37 0.69
 3 -6 -3 12.9 0.69
 -3 -6 3 13.08 0.67
 -3 -6 3 12.11 0.72
 -3 6 2 84.78 2.79
 -3 6 2 84.16 2.95
 3 6 -2 91.05 3.22
 3 6 -2 88.83 3.26
 3 -6 -2 84.65 3.07
 3 -6 -2 81.84 2.9
 -3 -6 2 89.86 3.18
 -3 -6 2 90.08 3.39
 -3 6 1 20.22 0.99
 -3 6 1 18.41 0.84
 3 6 -1 22.13 0.89
 3 -6 -1 20.58 0.92
 3 -6 -1 22.12 1
 -3 -6 1 23.42 0.95
 -3 -6 1 22.22 1.06
 -3 6 0 352.24 11.24
 -3 6 0 347.77 11.1
 3 6 0 342.09 11.23
 3 6 0 329.26 11.12
 3 -6 0 361.24 10.88
 3 -6 0 349.99 11.24
 -3 -6 0 338.68 11.19
 -3 -6 0 350.49 11.27
 -3 6 -1 106.23 3.54
 -3 6 -1 109.79 3.6
 3 6 1 101.15 3.65
 3 6 1 105.14 3.62
 3 -6 1 103.22 3.41
 3 -6 1 103.19 3.61
 -3 -6 -1 105.26 3.62
 -3 -6 -1 97.93 3.49
 -3 6 -2 215.71 6.97
 -3 6 -2 219.82 7.35
 3 6 2 206.24 7.06
 3 6 2 196.27 7.13
 3 -6 2 226.27 7.62
 3 -6 2 216.16 7.26
 -3 -6 -2 205.39 7.06
 -3 -6 -2 209.89 7.13
 -3 6 -3 24.28 0.99
 -3 6 -3 24.9 0.92
 3 6 3 25.3 0.95
 3 6 3 22.3 0.96
 3 -6 3 22.71 0.89
 3 -6 3 24.6 0.95
 -3 -6 -3 24.28 1.05
 -3 -6 -3 24.47 1.11
 -3 6 -4 31.85 1.24
 -3 6 -4 32.17 1.21
 3 6 4 32.07 1.12
 3 6 4 32.99 1.21
 3 -6 4 32.28 1.25
 3 -6 4 31.66 1.18
 -3 -6 -4 30.95 1.1
 -3 -6 -4 31.55 1.3
 -3 6 -5 96.18 3.22
 -3 6 -5 95.85 3.24
 3 6 5 95.28 3.08
 3 6 5 91.56 3.24
 3 -6 5 94.94 3.27
 3 -6 5 96.34 3.22
 -3 -6 -5 96.95 3.02
 -3 -6 -5 93.57 3.27
 -3 6 -6 1.5 0.45
 -3 6 -6 0.55 0.29
 3 6 6 1.08 0.21
 3 -6 6 0.93 0.3
 3 -6 6 -0.14 0.57
 -3 -6 -6 0.99 0.29
 -3 -6 -6 0.32 0.35
 -3 6 -7 88.38 3.45
 -3 6 -7 69.12 3.46
 3 -6 7 80.5 3.48
 3 -6 7 89.48 3.46
 -3 6 -8 101.83 3.86
 -3 6 -8 96.01 3.05
 3 6 8 88.51 3.04
 3 6 8 96.41 2.91
 3 -6 8 99.16 3.17
 3 -6 8 97.93 3.83
 -3 -6 -8 90.72 3.04
 -3 6 -9 25.64 1.29
 -3 6 -9 27.43 1.09
 3 -6 9 26.53 1.12
 3 -6 9 25.55 1.35
 -3 6 -10 105.96 3.86
 -3 6 -10 106.34 3.53
 3 -6 10 109.99 3.61
 3 -6 10 97.37 3.84
 -3 6 -11 8.51 0.71
 -3 6 -11 8.92 0.63
 3 -6 11 7.94 0.67
 3 -6 11 6.87 0.82
 -3 6 -12 14.2 0.94
 -3 6 -12 13.17 0.74
 3 -6 12 16.84 0.91
 3 -6 12 14.16 0.89
 -3 6 -13 22.64 1.17
 -3 6 -13 20.75 1.52
 3 -6 13 18.53 1.34
 -3 6 -14 106.54 3.4
 3 -6 14 96.3 3.77
 3 -6 14 95.95 3.63
 -3 6 -15 26.25 1.72
 -3 7 15 0.59 0.41
 -3 7 15 0.1 0.41
 3 7 -15 0.19 0.63
 3 -7 -15 -0.3 0.7
 -3 -7 15 0.5 0.66
 -3 7 14 9.72 0.71
 3 7 -14 6.68 0.74
 3 7 -14 8.64 0.83
 -3 -7 14 9.71 0.59
 -3 -7 14 5.73 0.83
 3 7 -13 113.45 3.6
 3 7 -13 99.66 3.72
 3 -7 -13 105.22 3.73
 -3 -7 13 109.24 3.54
 -3 -7 13 104.27 3.83
 -3 7 12 6.27 0.56
 3 7 -12 6.36 0.65
 3 7 -12 6.65 0.69
 3 -7 -12 5.26 0.49
 3 -7 -12 5.78 0.7
 -3 -7 12 6.28 0.61
 -3 -7 12 7.72 0.87
 -3 7 11 1.42 0.37
 -3 7 11 1.47 0.35
 3 7 -11 1.39 0.49
 3 7 -11 -0.49 0.51
 3 -7 -11 1.79 0.38
 3 -7 -11 1.94 0.52
 -3 -7 11 0.41 0.46
 -3 -7 11 0.96 0.74
 -3 7 10 59.13 2.13
 -3 7 10 62.33 2.16
 3 7 -10 62.33 2.99
 3 -7 -10 62.62 2.33
 3 -7 -10 62.69 2.4
 -3 -7 10 59.28 2.52
 -3 7 9 61.61 2.43
 -3 7 9 61.33 2.16
 3 7 -9 64.04 2.54
 3 7 -9 58.27 2.51
 3 -7 -9 62.32 2.21
 3 -7 -9 65.78 2.11
 -3 -7 9 60.19 2.48
 -3 -7 9 73.34 2.66
 -3 7 8 206.13 6.82
 -3 7 8 199.6 6.53
 3 7 -8 194.34 6.44
 3 7 -8 200.96 6.46
 3 -7 -8 200.19 6.6
 3 -7 -8 207.34 6.45
 -3 -7 8 204.02 6.64
 -3 -7 8 200.9 6.6
 -3 7 7 5.83 0.42
 -3 7 7 5.33 0.44
 3 7 -7 5.46 0.82
 3 7 -7 5.92 0.7
 3 -7 -7 5.46 0.45
 3 -7 -7 6.95 0.6
 -3 -7 7 5.95 0.68
 -3 -7 7 4.93 0.97
 -3 7 6 16.91 0.77
 3 7 -6 13.44 0.68
 3 7 -6 12.7 0.67
 3 -7 -6 16.68 0.7
 3 -7 -6 17.3 0.79
 -3 -7 6 14.79 0.67
 -3 -7 6 12.76 0.77
 -3 7 5 110.25 3.97
 -3 7 5 119.52 4
 3 7 -5 117.14 3.72
 3 7 -5 118.72 3.99
 -3 -7 5 115.38 4.24
 -3 -7 5 117.61 3.86
 -3 7 4 51.3 2.03
 3 7 -4 55.91 1.8
 3 7 -4 54.23 1.99
 3 -7 -4 46.76 1.94
 3 -7 -4 53 1.82
 -3 -7 4 56.17 2.2
 -3 -7 4 55.85 1.93
 -3 7 3 33.33 1.18
 -3 7 3 31.54 1.22
 3 -7 -3 32.73 1.27
 3 -7 -3 33.81 1.23
 -3 7 2 0.81 0.23
 -3 7 2 0.7 0.4
 3 7 -2 1.03 0.32
 3 7 -2 0.44 0.39
 3 -7 -2 1.25 0.41
 3 -7 -2 0.52 0.43
 -3 -7 2 0.84 0.29
 -3 -7 2 1.21 0.46
 -3 7 1 5.95 0.47
 -3 7 1 6.2 0.43
 3 7 -1 4.63 0.4
 3 7 -1 4.48 0.46
 3 -7 -1 5.6 0.4
 3 -7 -1 5.27 0.39
 -3 -7 1 4.77 0.41
 -3 -7 1 4.87 0.52
 -3 7 0 9.53 0.5
 -3 7 0 10.19 0.6
 3 7 0 9.2 0.48
 3 7 0 8.58 0.51
 3 -7 0 9.29 0.56
 3 -7 0 8.32 0.47
 -3 -7 0 7.66 0.46
 -3 -7 0 9.01 0.59
 -3 7 -1 20.11 0.84
 -3 7 -1 21.87 1.01
 3 7 1 19.11 0.82
 3 7 1 19.57 0.81
 3 -7 1 21.91 1.05
 3 -7 1 19.98 0.85
 -3 -7 -1 18.58 0.78
 -3 -7 -1 19.61 0.88
 -3 7 -2 5.37 0.42
 -3 7 -2 5.28 0.39
 3 -7 2 4.68 0.39
 3 -7 2 5.24 0.46
 -3 -7 -2 6.58 0.5
 -3 -7 -2 7.31 0.92
 -3 7 -3 6.23 0.57
 -3 7 -3 6.36 0.49
 3 7 3 6.89 0.43
 3 7 3 6.33 0.4
 3 -7 3 6.89 0.58
 3 -7 3 7.24 0.62
 -3 -7 -3 6.68 0.41
 -3 -7 -3 5.55 0.53
 3 7 4 17.7 0.71
 3 7 4 16.48 0.73
 -3 -7 -4 17.24 0.74
 -3 -7 -4 18.62 1.04
 -3 7 -5 0.46 0.65
 -3 7 -5 0.39 0.31
 3 7 5 0.01 0.31
 3 -7 5 0.37 0.28
 3 -7 5 0.28 0.65
 -3 -7 -5 0.57 0.27
 -3 -7 -5 0.74 0.31
 -3 7 -6 34.63 1.67
 -3 7 -6 32.4 1.25
 3 7 6 34.42 1.14
 3 7 6 31.93 1.28
 3 -7 6 30.75 1.15
 3 -7 6 35.92 1.74
 -3 -7 -6 32.74 1.23
 -3 -7 -6 30.33 1.3
 -3 7 -7 71.19 2.46
 -3 7 -7 67.11 2.29
 3 7 7 71.37 2.4
 3 -7 7 77.36 2.63
 3 -7 7 66.25 2.33
 -3 -7 -7 73.63 2.36
 -3 -7 -7 67.47 2.38
 -3 7 -8 257.28 8.1
 -3 7 -8 253.96 8.12
 3 7 8 245.05 7.94
 3 7 8 263.64 7.9
 3 -7 8 276.58 8.18
 3 -7 8 247.7 8.24
 -3 -7 -8 262.82 8.1
 -3 -7 -8 249.96 7.91
 -3 7 -9 91.26 3.28
 -3 7 -9 97.67 3.05
 3 -7 9 102.13 3.29
 3 -7 9 91.47 3.31
 -3 7 -10 9.01 0.65
 -3 7 -10 8.6 0.66
 3 -7 10 9.93 0.78
 3 -7 10 7.42 0.73
 -3 7 -11 6.76 0.65
 -3 7 -11 9.49 0.66
 3 -7 11 8.61 0.71
 3 -7 11 5.21 0.67
 -3 7 -12 19.59 1.11
 -3 7 -12 20.41 0.99
 3 -7 12 25.21 1.08
 3 -7 12 21.36 1.1
 -3 7 -13 1.13 0.68
 3 -7 13 0.28 0.63
 -3 7 -14 21.85 1.4
 3 -7 14 23.67 1.31
 3 8 -15 0.92 0.62
 3 8 -15 0.91 0.57
 -3 -8 15 1.38 0.74
 -3 -8 15 0.55 0.44
 3 8 -14 11.33 1.26
 -3 -8 14 9.71 1.24
 -3 8 13 2.37 0.47
 3 8 -13 2.43 0.82
 3 8 -13 1.81 0.58
 -3 -8 13 1.51 0.53
 -3 -8 13 2.18 1.02
 -3 8 12 1.67 0.44
 -3 8 12 1.56 0.42
 3 8 -12 1.75 0.62
 3 8 -12 1.07 0.47
 3 -8 -12 1.7 0.37
 3 -8 -12 0.96 0.56
 -3 -8 12 1.36 0.5
 -3 -8 12 2.02 1.03
 -3 8 11 3.89 0.39
 -3 8 11 4.57 0.47
 3 8 -11 3.54 0.78
 3 -8 -11 3.26 0.39
 3 -8 -11 3.73 0.51
 -3 -8 11 7.2 0.86
 -3 -8 11 4.47 1.04
 -3 8 10 3.88 0.44
 -3 8 10 4.16 0.44
 3 8 -10 3.49 0.49
 3 8 -10 3.53 0.42
 3 -8 -10 2.98 0.41
 3 -8 -10 5.06 0.56
 -3 8 9 38.68 1.56
 -3 8 9 39.2 1.51
 3 8 -9 27.45 1.76
 3 -8 -9 34.94 1.24
 3 -8 -9 37.67 1.54
 -3 -8 9 29.84 1.57
 -3 -8 9 27.65 1.55
 -3 8 8 19.02 0.94
 -3 8 8 20.1 1.06
 3 8 -8 17.79 0.83
 3 8 -8 17.23 1.16
 3 -8 -8 17.85 0.93
 3 -8 -8 18.95 0.97
 -3 -8 8 16.56 1.03
 -3 -8 8 18.68 0.96
 -3 8 7 6.09 0.55
 -3 8 7 7.03 0.65
 3 8 -7 6.79 0.5
 3 8 -7 6.44 0.55
 3 -8 -7 6.33 0.48
 3 -8 -7 5.37 0.45
 -3 -8 7 6.61 0.39
 -3 -8 7 7.03 0.53
 -3 8 6 9.59 0.58
 -3 8 6 8.88 0.59
 3 8 -6 10.34 1.14
 3 8 -6 10.16 1.06
 3 -8 -6 8.47 0.53
 3 -8 -6 9.34 0.55
 -3 -8 6 10.5 0.99
 -3 -8 6 10.49 1.29
 3 8 -5 12.45 0.74
 3 8 -5 13.48 0.63
 -3 -8 5 13.54 0.61
 -3 -8 5 12.5 0.83
 3 8 -4 166.6 5.56
 3 8 -4 163.22 5.51
 3 -8 -4 177.15 5.84
 3 -8 -4 173.55 5.31
 -3 -8 4 160.96 5.13
 -3 -8 4 159.69 5.58
 -3 8 3 123.96 4.37
 -3 8 3 132.34 4.33
 3 8 -3 131.86 4.12
 3 8 -3 135.02 4.6
 3 -8 -3 137.4 4.44
 3 -8 -3 126.09 4.17
 -3 -8 3 133.39 4.07
 -3 -8 3 130.65 4.44
 -3 8 2 1.3 0.37
 -3 8 2 1.44 0.32
 3 8 -2 1.28 0.36
 3 8 -2 1.39 0.35
 3 -8 -2 0.84 0.3
 3 -8 -2 0.81 0.39
 -3 -8 2 1.22 0.29
 -3 -8 2 1.57 0.39
 -3 8 1 10.82 0.63
 -3 8 1 12.14 0.62
 3 8 -1 10.32 0.61
 3 8 -1 10.54 0.57
 3 -8 -1 11.3 0.68
 3 -8 -1 10.49 0.61
 -3 -8 1 10.59 0.56
 -3 -8 1 10.3 0.69
 -3 8 0 160.89 5.6
 -3 8 0 164.73 5.12
 3 8 0 163.32 5.24
 3 8 0 162.2 5.5
 3 -8 0 164.91 5.08
 3 -8 0 162.9 5.22
 -3 -8 0 153.74 5.52
 -3 -8 0 159.79 5.28
 -3 8 -1 4.33 0.67
 -3 8 -1 3.96 0.48
 3 8 1 3.52 0.37
 3 8 1 3.1 0.39
 3 -8 1 3.7 0.38
 3 -8 1 3.76 0.72
 -3 -8 -1 3.04 0.32
 -3 -8 -1 3.74 0.51
 -3 8 -2 8.25 0.62
 -3 8 -2 7.52 0.45
 3 8 2 7.57 0.46
 3 8 2 6.91 0.45
 3 -8 2 7.61 0.48
 3 -8 2 7.75 0.47
 -3 -8 -2 7.39 0.44
 -3 -8 -2 7.4 0.64
 -3 8 -3 9.27 0.87
 -3 8 -3 8.54 0.59
 3 8 3 8.13 0.5
 3 8 3 7.85 0.63
 3 -8 3 8.95 0.47
 3 -8 3 10.26 0.88
 -3 -8 -3 7.73 0.7
 -3 -8 -3 7.12 0.59
 -3 8 -4 2.92 0.61
 -3 8 -4 1.96 0.38
 3 8 4 2.27 0.37
 3 8 4 1.55 0.45
 3 -8 4 2 0.36
 3 -8 4 2.53 0.58
 -3 -8 -4 1.65 0.27
 -3 -8 -4 0.96 0.68
 -3 8 -5 129.27 4.2
 -3 8 -5 119.13 4.05
 3 8 5 128.28 4.14
 3 8 5 127.5 4.12
 3 -8 5 125.42 4.12
 3 -8 5 127.94 4.1
 -3 -8 -5 131.56 4
 -3 -8 -5 123.58 4.35
 -3 8 -6 42.22 1.58
 -3 8 -6 43.02 1.71
 3 8 6 43.1 1.54
 3 8 6 41.36 1.5
 3 -8 6 42.78 1.56
 3 -8 6 42.54 1.89
 -3 -8 -6 41.84 1.49
 -3 -8 -6 42.72 1.58
 -3 8 -7 20 0.82
 -3 8 -7 21.06 0.83
 3 8 7 18.44 0.81
 3 8 7 16.19 0.78
 3 -8 7 20.21 0.86
 3 -8 7 19.15 0.87
 -3 -8 -7 19.57 0.77
 -3 8 -8 9.2 0.63
 -3 8 -8 10.35 0.57
 3 -8 8 10.89 0.65
 3 -8 8 9.11 0.72
 -3 8 -9 1.21 0.5
 -3 8 -9 0.78 0.48
 3 -8 9 1.32 0.41
 3 -8 9 1.94 0.51
 -3 8 -10 2.72 0.49
 -3 8 -10 2.94 0.57
 3 -8 10 4.47 0.55
 3 -8 10 2.36 0.61
 -3 8 -11 19.21 1.34
 -3 8 -11 22.92 1.36
 3 -8 11 25.1 1.33
 3 -8 11 22.28 1.51
 -3 8 -12 6.21 1.05
 -3 8 -12 5.85 0.72
 3 -8 12 6.06 0.9
 3 -8 12 5.43 1
 -3 8 -13 44.32 2.15
 3 -8 13 45.54 1.85
 -3 8 -14 19.57 1.38
 3 -8 14 18.97 1.39
 -3 9 14 81.88 2.7
 -3 9 14 73.27 2.65
 3 9 -14 63.81 3.03
 3 9 -14 72.56 2.59
 3 -9 -14 78.95 2.69
 3 -9 -14 76.27 3.03
 -3 -9 14 77.84 2.73
 -3 -9 14 78.42 3.07
 -3 9 13 2.35 0.44
 3 9 -13 2.53 0.79
 3 -9 -13 2.13 0.45
 -3 -9 13 4.54 0.81
 -3 9 12 24.39 1.27
 -3 9 12 28.3 1.22
 3 9 -12 25.45 1.22
 3 -9 -12 24.69 1.33
 3 -9 -12 25.32 1.39
 -3 -9 12 26.02 1.15
 -3 9 11 112.81 3.76
 -3 9 11 116.9 3.62
 3 -9 -11 118.25 3.7
 3 -9 -11 122.49 3.88
 -3 -9 11 115.86 3.63
 -3 -9 11 97.38 4.58
 -3 9 10 70.51 2.64
 -3 9 10 67.79 2.3
 3 9 -10 72.95 2.44
 3 9 -10 65.11 2.38
 3 -9 -10 71.18 2.23
 3 -9 -10 72.42 2.47
 -3 -9 10 66.29 2.3
 -3 -9 10 66.01 2.47
 -3 9 9 10.07 0.63
 -3 9 9 9.51 0.57
 3 9 -9 10.57 0.86
 3 9 -9 8.88 0.66
 3 -9 -9 8.48 0.6
 3 -9 -9 10.04 0.73
 -3 -9 9 9.83 0.62
 -3 -9 9 9.47 0.8
 -3 9 8 2.76 0.7
 -3 9 8 3.41 0.55
 3 9 -8 2.99 0.7
 3 9 -8 3.11 0.72
 3 -9 -8 2.9 0.69
 -3 -9 8 3.68 0.73
 -3 -9 8 2.86 0.75
 -3 9 7 11.35 0.72
 -3 9 7 11.85 0.63
 3 9 -7 13.44 0.64
 3 9 -7 14.6 0.63
 3 -9 -7 11.24 0.61
 -3 -9 7 13.16 0.59
 -3 -9 7 13.54 0.71
 -3 9 6 46.91 1.81
 -3 9 6 46.82 1.81
 3 9 -6 43.22 1.85
 3 9 -6 46.59 1.68
 3 -9 -6 47.6 1.64
 3 -9 -6 47.67 1.59
 -3 -9 6 47.29 1.74
 -3 -9 6 42.07 2.01
 -3 9 5 20.67 1
 -3 9 5 23.84 1.07
 3 9 -5 22.84 0.94
 3 9 -5 22.93 0.99
 3 -9 -5 24.83 1.11
 3 -9 -5 24.27 1.02
 -3 -9 5 25.4 1
 -3 -9 5 22.32 1.03
 3 9 -4 51.58 1.73
 3 9 -4 50.41 1.91
 -3 -9 4 52.75 1.77
 -3 -9 4 49.07 1.75
 -3 9 3 58.69 2.26
 3 9 -3 50.99 1.77
 3 9 -3 48.28 1.76
 3 -9 -3 57.98 2.08
 -3 -9 3 49.26 1.95
 -3 -9 3 49.01 1.79
 -3 9 2 59.98 2.32
 -3 9 2 65.4 2.19
 3 9 -2 58.73 2.03
 3 9 -2 58.92 2.1
 3 -9 -2 59.69 2.13
 3 -9 -2 62.08 2.24
 -3 -9 2 58.29 2.08
 -3 -9 2 56.09 2.12
 -3 9 1 309.55 10.03
 -3 9 1 308.45 9.5
 3 9 -1 316.89 9.7
 3 9 -1 312.55 9.93
 3 -9 -1 305.68 9.52
 3 -9 -1 305 9.57
 -3 -9 1 308.75 10.17
 -3 -9 1 314.17 9.78
 -3 9 0 6.44 0.55
 -3 9 0 6.35 0.47
 3 9 0 7.22 0.46
 3 9 0 6.3 0.45
 3 -9 0 6.27 0.46
 3 -9 0 6.17 0.57
 -3 -9 0 6.35 0.43
 -3 -9 0 5.61 0.58
 -3 9 -1 28.46 1.4
 -3 9 -1 29.16 1.15
 3 9 1 26.83 1.09
 3 9 1 25.07 1.55
 3 -9 1 32.16 1.38
 3 -9 1 27.7 1.4
 -3 -9 -1 26.88 1.24
 -3 -9 -1 26.16 1.12
 -3 9 -2 0.27 0.59
 -3 9 -2 -0.01 0.39
 3 9 2 -0.09 0.31
 3 9 2 0.08 0.36
 3 -9 2 0.28 0.4
 3 -9 2 0.93 0.41
 -3 -9 -2 -0.02 0.36
 -3 -9 -2 -0.18 0.53
 -3 9 -3 32.85 1.6
 -3 9 -3 32.47 1.4
 3 9 3 33.87 1.47
 3 9 3 33.84 1.4
 3 -9 3 33.03 1.35
 3 -9 3 32.73 1.74
 -3 -9 -3 38.08 1.34
 -3 -9 -3 37.83 1.59
 -3 9 -4 207.06 6.65
 -3 9 -4 209.61 6.59
 3 9 4 212.16 6.76
 3 9 4 210.19 6.75
 3 -9 4 212.12 6.68
 3 -9 4 213.01 6.57
 -3 -9 -4 206.34 6.96
 -3 -9 -4 207.24 6.74
 -3 9 -5 54.47 2.11
 -3 9 -5 55.99 2.12
 3 9 5 48.82 1.89
 3 9 5 52.19 1.8
 3 -9 5 53.57 1.73
 3 -9 5 51.34 1.79
 -3 -9 -5 50.51 1.75
 -3 -9 -5 50.62 1.94
 -3 9 -6 112.59 3.85
 -3 9 -6 111.16 3.65
 3 9 6 110.73 3.79
 3 9 6 112.45 3.86
 3 -9 6 127.75 4.12
 3 -9 6 113.86 3.89
 -3 -9 -6 114.11 3.67
 -3 -9 -6 115.33 4.08
 -3 9 -7 95.14 3.48
 -3 9 -7 99.29 3.19
 3 9 7 94.47 3.25
 3 9 7 96.57 3.2
 3 -9 7 101.48 3.4
 3 -9 7 99.05 3.33
 -3 -9 -7 104.3 3.41
 -3 -9 -7 99.39 3.44
 -3 9 -8 35.06 1.7
 -3 9 -8 37.97 1.52
 3 -9 8 39.65 1.88
 -3 -9 -8 38.62 1.32
 -3 9 -9 15.32 0.77
 -3 9 -9 8.47 0.97
 3 -9 9 12.28 0.88
 3 -9 9 11.94 0.88
 -3 9 -10 113.97 3.79
 -3 9 -10 116.82 3.69
 3 -9 10 118.64 3.96
 3 -9 10 115.37 4.08
 -3 9 -11 1.2 0.58
 -3 9 -11 1.74 0.74
 3 -9 11 1.25 0.86
 -3 9 -12 39.47 1.81
 -3 9 -12 46.28 2.18
 3 -9 12 46.03 1.71
 3 -9 12 40.04 2.58
 -3 9 -13 -0.07 0.79
 3 -9 13 0.36 1.23
 3 -9 13 -0.03 0.68
 -3 9 -14 44.99 2.22
 -3 9 -14 52.48 2.48
 3 -9 14 48.86 2.13
 3 10 -14 11.56 1.34
 -3 -10 14 14.44 1.09
 3 10 -13 0.64 0.75
 -3 -10 13 0.16 0.64
 3 10 -12 21.93 1.12
 3 -10 -12 22.03 1.02
 -3 -10 12 22.96 1.01
 -3 10 11 31.53 1.7
 3 10 -11 33.21 1.95
 3 10 -11 39.66 1.51
 3 -10 -11 41.08 1.61
 -3 10 10 3.13 0.77
 3 10 -10 0.47 0.7
 3 10 -10 1.08 0.69
 3 -10 -10 3.49 0.79
 -3 -10 10 0.3 0.47
 -3 -10 10 0.27 0.65
 -3 10 9 29.72 1.13
 -3 10 9 22.75 1.12
 3 10 -9 28.34 1.61
 3 10 -9 29.57 1.25
 3 -10 -9 24.82 1.15
 -3 -10 9 28.06 1.08
 -3 -10 9 28.25 1.56
 -3 10 8 1.06 0.37
 -3 10 8 1.64 0.41
 3 10 -8 1.57 0.48
 3 10 -8 1.71 0.4
 3 -10 -8 1.74 0.32
 -3 -10 8 1.67 0.42
 -3 -10 8 1.99 0.65
 -3 10 7 0.95 0.46
 -3 10 7 0.73 0.37
 3 10 -7 0.47 0.48
 3 10 -7 0.17 0.6
 3 -10 -7 0.6 0.31
 3 -10 -7 0.81 0.38
 -3 -10 7 0.52 0.49
 -3 -10 7 0.06 0.62
 -3 10 6 17.36 0.81
 -3 10 6 18.48 1.08
 3 10 -6 18.32 0.87
 3 10 -6 21.27 1.06
 3 -10 -6 18.64 1.04
 3 -10 -6 21.17 1.08
 -3 -10 6 22.7 1.07
 -3 -10 6 15.16 1.1
 -3 10 5 38.99 1.79
 -3 10 5 43.66 1.66
 3 10 -5 35.87 1.44
 3 10 -5 39.49 1.56
 3 -10 -5 42.96 1.65
 3 -10 -5 42.6 1.85
 -3 -10 5 39.93 1.58
 -3 -10 5 34.76 1.49
 -3 10 4 57.19 2.14
 -3 10 4 60.26 2.09
 3 10 -4 57.49 1.93
 3 10 -4 60.78 2.29
 -3 -10 4 60.34 2.13
 -3 -10 4 56.07 1.96
 -3 10 3 54.63 1.87
 3 10 -3 53.92 1.78
 3 10 -3 53.75 1.79
 3 -10 -3 51.34 1.8
 3 -10 -3 54.6 2.03
 -3 -10 3 52.72 1.87
 -3 -10 3 51.94 1.87
 -3 10 2 75.7 2.56
 -3 10 2 80.63 2.6
 3 10 -2 82.19 2.68
 3 10 -2 77.55 2.69
 3 -10 -2 79.33 2.61
 3 -10 -2 78.66 2.55
 -3 -10 2 74.85 2.76
 -3 -10 2 75.7 2.6
 -3 10 1 50.05 1.94
 -3 10 1 49.73 1.88
 3 10 -1 45.26 1.59
 3 10 -1 41.4 2.17
 3 -10 -1 50.96 2.01
 3 -10 -1 51.17 2.1
 -3 -10 1 42.36 1.66
 -3 -10 1 42.06 1.87
 -3 10 0 3.86 0.83
 -3 10 0 3.29 0.57
 3 10 0 0.83 0.51
 3 10 0 0.02 0.49
 3 -10 0 2.87 0.47
 3 -10 0 1.93 0.99
 -3 -10 0 0.29 0.53
 -3 10 -1 27.5 1.38
 -3 10 -1 26.15 1.12
 3 10 1 27.68 1.13
 3 10 1 24.87 1.09
 3 -10 1 27.82 1.13
 3 -10 1 29.78 1.31
 -3 -10 -1 26.18 1.3
 -3 -10 -1 24.08 1.21
 -3 10 -2 75.9 2.56
 -3 10 -2 77.51 2.84
 3 10 2 72.78 2.66
 3 10 2 76.9 2.55
 3 -10 2 76.92 2.84
 3 -10 2 76.92 2.68
 -3 -10 -2 74.68 2.7
 -3 -10 -2 75.68 2.6
 -3 10 -3 2.13 0.45
 -3 10 -3 1.97 0.41
 3 10 3 1.6 0.41
 3 10 3 2.03 0.39
 3 -10 3 2.01 0.39
 3 -10 3 1.65 0.47
 -3 -10 -3 1.45 0.51
 -3 -10 -3 1.88 0.59
 -3 10 -4 79.63 2.63
 -3 10 -4 85.96 2.9
 3 10 4 72.73 2.67
 3 10 4 77.54 2.55
 3 -10 4 77.25 2.64
 3 -10 4 76.08 2.9
 -3 -10 -4 75.96 2.56
 -3 -10 -4 73.39 2.82
 -3 10 -5 113.09 3.61
 -3 10 -5 106.6 3.52
 3 10 5 103.92 3.72
 3 10 5 105.72 3.67
 3 -10 5 107.87 3.78
 3 -10 5 111.8 3.63
 -3 -10 -5 117.64 3.65
 -3 -10 -5 105.21 3.55
 -3 10 -6 29.71 1.15
 -3 10 -6 27.87 1.11
 3 10 6 27.75 1.2
 3 -10 6 28.84 1.17
 3 -10 6 30.03 1.2
 -3 -10 -6 29.28 1.14
 -3 -10 -6 27.33 1.31
 -3 10 -7 210.23 6.63
 -3 10 -7 206.44 6.43
 3 10 7 196.93 6.88
 3 10 7 208.51 6.58
 3 -10 7 207.32 6.93
 3 -10 7 205.92 6.63
 -3 -10 -7 206.63 6.8
 -3 -10 -7 206.8 7.08
 -3 10 -8 0.23 0.55
 -3 10 -8 0.29 0.42
 3 -10 8 0.17 0.44
 3 -10 8 0.21 0.6
 -3 10 -9 40.8 1.51
 3 -10 9 39.2 1.46
 3 -10 9 39.75 1.55
 -3 10 -10 43.05 1.74
 -3 10 -10 43.81 1.55
 3 -10 10 44.23 1.69
 3 -10 10 42.83 1.8
 -3 10 -11 8.13 0.74
 3 -10 11 7.44 0.93
 -3 10 -12 21.06 1.2
 -3 10 -12 23.36 1.45
 3 -10 12 23.53 1.46
 3 -10 12 23.63 1.59
 -3 10 -13 5.95 0.88
 3 -10 13 6.43 1.37
 3 -10 13 5.34 0.8
 -3 10 -14 211.07 7.77
 3 -10 14 196.35 6.78
 -3 11 13 1.34 0.57
 3 11 -13 0.12 0.47
 3 -11 -13 0.5 0.42
 -3 -11 13 0.56 0.79
 -3 11 12 2.51 0.48
 -3 11 12 3.41 0.65
 3 11 -12 1.05 0.41
 3 -11 -12 3.31 0.48
 3 -11 -12 3.13 0.62
 -3 -11 12 3.86 0.58
 -3 11 11 205.22 6.54
 -3 11 11 204.47 6.79
 3 11 -11 199.33 6.58
 3 -11 -11 212.93 6.45
 3 -11 -11 211.45 7.28
 -3 -11 11 199.82 6.61
 -3 11 10 118.03 3.84
 -3 11 10 121.32 4.21
 3 11 -10 114.69 4.7
 3 11 -10 117.25 3.74
 3 -11 -10 112.1 3.78
 3 -11 -10 116.94 4
 -3 -11 10 115.95 3.83
 -3 -11 10 120.05 4.78
 -3 11 9 14.35 1.05
 3 11 -9 13.02 1.08
 3 11 -9 11.95 1.16
 3 -11 -9 14.77 0.8
 -3 -11 9 10.28 1.02
 -3 -11 9 14.79 1.2
 -3 11 8 11.71 0.75
 -3 11 8 12.14 0.75
 3 11 -8 11.19 0.81
 3 11 -8 12.86 1
 3 -11 -8 8.61 0.65
 3 -11 -8 11.2 0.65
 -3 -11 8 13.58 0.85
 -3 -11 8 12.4 1.02
 -3 11 7 1.58 0.31
 -3 11 7 1.71 0.47
 3 11 -7 1.46 0.66
 3 11 -7 1.12 0.84
 3 -11 -7 1.7 0.32
 3 -11 -7 1.33 0.42
 -3 -11 7 1.11 0.66
 -3 -11 7 0.1 0.8
 -3 11 6 2.16 0.46
 3 11 -6 1.75 0.59
 3 11 -6 1.97 0.46
 3 -11 -6 1.38 0.36
 3 -11 -6 1.61 0.45
 -3 -11 6 2.31 0.38
 -3 -11 6 2.22 0.74
 -3 11 5 0.42 0.5
 -3 11 5 0.43 0.36
 3 11 -5 0.36 0.48
 3 11 -5 -0.4 0.39
 3 -11 -5 0.03 0.31
 3 -11 -5 -0.03 0.31
 -3 -11 5 0.18 0.36
 -3 -11 5 0.06 0.63
 -3 11 4 12.15 0.79
 -3 11 4 11.92 0.7
 3 11 -4 12.25 0.71
 3 -11 -4 14.04 0.78
 3 -11 -4 15.35 0.9
 -3 -11 4 11.67 0.58
 -3 -11 4 12.64 0.84
 3 11 -3 1.43 0.56
 3 11 -3 1.35 0.46
 3 -11 -3 2.14 0.44
 3 -11 -3 1.86 0.53
 -3 -11 3 0.96 0.38
 -3 -11 3 1.12 0.44
 -3 11 2 206.68 6.79
 -3 11 2 216.27 7.15
 3 11 -2 217.16 6.96
 3 11 -2 208.73 6.91
 3 -11 -2 219.22 7.23
 3 -11 -2 210.13 6.75
 -3 -11 2 215.3 6.72
 -3 -11 2 205.53 6.88
 -3 11 1 93.17 3.12
 -3 11 1 96.24 3.4
 3 11 -1 86.88 3.2
 3 11 -1 90.55 3.12
 3 -11 -1 97.86 3.51
 3 -11 -1 92.47 3.05
 -3 -11 1 94.35 2.99
 -3 -11 1 86.49 3.22
 -3 11 0 82.43 2.91
 -3 11 0 87.48 3.08
 3 11 0 83.04 3.11
 3 11 0 80.1 2.79
 3 -11 0 83.81 2.9
 3 -11 0 82.83 2.78
 -3 -11 0 81.08 2.89
 -3 -11 0 80.91 2.77
 -3 11 -1 58.79 2.58
 -3 11 -1 58.48 2.08
 3 11 1 58.99 2.21
 3 11 1 58.09 2.08
 3 -11 1 58.07 2.01
 3 -11 1 60.77 2.45
 -3 -11 -1 58.35 2.11
 -3 -11 -1 55.24 2.11
 -3 11 -2 317.69 10.11
 -3 11 -2 334.33 10.6
 3 11 2 325.04 10.37
 3 11 2 312.15 10.14
 3 -11 2 323.21 10.42
 3 -11 2 320.44 10.02
 -3 -11 -2 334.51 10.27
 -3 -11 -2 317.33 10.2
 -3 11 -3 5.63 0.56
 -3 11 -3 4.37 0.5
 3 11 3 4.51 0.5
 3 11 3 4.94 0.51
 3 -11 3 4.6 0.47
 3 -11 3 5.34 0.59
 -3 -11 -3 3.95 0.43
 -3 -11 -3 4.56 0.81
 -3 11 -4 17.47 0.86
 -3 11 -4 17.64 0.77
 3 11 4 17.22 0.94
 3 11 4 16.24 1.09
 3 -11 4 14.9 0.79
 3 -11 4 17.5 0.92
 -3 -11 -4 17.62 0.89
 -3 -11 -4 17.97 1
 -3 11 -5 11.74 0.73
 -3 11 -5 11.76 0.66
 3 11 5 11.81 0.78
 3 11 5 9.9 0.69
 3 -11 5 9.54 0.72
 3 -11 5 11.97 0.78
 -3 -11 -5 11.67 0.68
 -3 -11 -5 10.98 0.84
 -3 11 -6 48 1.67
 -3 11 -6 45.48 1.82
 3 11 6 43.26 1.77
 3 11 6 41.36 1.69
 3 -11 6 44.41 1.64
 3 -11 6 45.12 1.73
 -3 -11 -6 47.38 1.72
 -3 -11 -6 37.89 1.92
 -3 11 -7 4.51 0.65
 -3 11 -7 3.74 0.52
 3 -11 7 3.56 0.62
 3 -11 7 5.06 0.71
 -3 -11 -7 2.13 0.55
 -3 11 -8 9.72 0.69
 3 11 8 5.96 0.47
 3 -11 8 7.52 0.59
 3 -11 8 9.38 0.74
 -3 -11 -8 7.32 0.69
 -3 11 -9 12.51 0.95
 -3 11 -9 12.33 0.74
 3 -11 9 11.76 0.73
 3 -11 9 14.5 1.13
 -3 11 -10 7.58 0.88
 -3 11 -10 6.45 0.75
 3 -11 10 7.55 0.78
 3 -11 10 4.62 0.95
 -3 11 -11 4.18 0.84
 3 -11 11 4.17 0.97
 -3 11 -12 109.34 3.62
 -3 11 -12 108.32 4.19
 3 -11 12 100.38 4.27
 -3 11 -13 25.36 1.82
 3 -11 13 32.27 1.9
 3 -11 13 23.61 1.67
 3 -12 -12 99.86 3.29
 -3 -12 12 83.69 3.11
 -3 12 11 1.83 0.7
 -3 12 11 1.31 0.67
 3 12 -11 1.01 0.83
 3 12 -11 1.42 0.94
 3 -12 -11 1.64 0.57
 3 -12 -11 1.57 0.75
 -3 -12 11 1.64 0.85
 -3 -12 11 4.39 1.26
 -3 12 10 28.71 1.47
 -3 12 10 28.07 1.26
 3 12 -10 23.04 1.46
 3 12 -10 26.86 1.85
 3 -12 -10 23.88 1.42
 3 -12 -10 31.7 1.4
 -3 -12 10 30.41 1.37
 -3 -12 10 25.14 1.82
 -3 12 9 17.54 1.12
 -3 12 9 14.02 0.84
 3 12 -9 13.77 1.11
 3 12 -9 17 1.26
 3 -12 -9 15.11 0.81
 -3 -12 9 14.44 0.89
 -3 -12 9 15.75 1.54
 -3 12 8 46.18 1.77
 -3 12 8 46.13 1.72
 3 12 -8 44.21 2.03
 3 12 -8 47.81 1.92
 3 -12 -8 49.55 1.74
 3 -12 -8 39.18 1.73
 -3 -12 8 42.25 2.14
 -3 -12 8 52.27 2.22
 -3 12 7 17.75 1.18
 -3 12 7 16.74 0.88
 3 12 -7 17.61 0.99
 3 12 -7 18.49 1.09
 3 -12 -7 16.44 0.94
 3 -12 -7 18.13 1.09
 -3 -12 7 16.35 1.02
 -3 -12 7 18.62 1.09
 -3 12 6 54.39 1.76
 -3 12 6 48.21 1.91
 3 12 -6 46.13 1.8
 3 12 -6 46.06 2.33
 3 -12 -6 48.41 2.05
 3 -12 -6 52.24 1.74
 -3 -12 6 45.51 1.74
 -3 -12 6 50.48 2.2
 -3 12 5 31.23 1.38
 -3 12 5 33.21 1.22
 3 12 -5 33.44 1.74
 3 12 -5 34.14 1.3
 3 -12 -5 36.04 1.36
 3 -12 -5 35.13 1.51
 -3 -12 5 34.1 1.28
 -3 -12 5 32.59 1.37
 -3 12 4 11.09 0.74
 -3 12 4 13.39 0.71
 3 12 -4 11.06 0.91
 3 12 -4 11.97 0.86
 3 -12 -4 13.82 0.69
 3 -12 -4 11.97 0.69
 -3 -12 4 12.07 0.9
 -3 -12 4 9.41 1.04
 -3 12 3 12.24 0.73
 -3 12 3 13.08 0.65
 3 12 -3 11.73 0.7
 3 12 -3 12.6 0.79
 -3 -12 3 13.61 0.75
 -3 -12 3 13.79 1.01
 -3 12 2 2.66 0.66
 3 12 -2 1.09 0.56
 3 12 -2 0.58 0.62
 3 -12 -2 1.77 0.5
 3 -12 -2 2.37 0.58
 -3 -12 2 0.9 0.52
 -3 -12 2 1.22 0.74
 -3 12 1 73.98 2.54
 -3 12 1 77.4 2.96
 3 12 -1 69.65 2.69
 3 12 -1 72.38 2.51
 3 -12 -1 70.66 2.8
 3 -12 -1 73.43 2.4
 -3 -12 1 72.78 2.63
 -3 -12 1 70.38 2.67
 -3 12 0 2.22 0.48
 -3 12 0 2.25 0.41
 3 12 0 2.22 0.52
 3 12 0 2.97 0.52
 3 -12 0 2.56 0.41
 3 -12 0 2.2 0.47
 -3 -12 0 2.43 0.61
 -3 -12 0 2.62 0.66
 -3 12 -1 90.49 3.61
 -3 12 -1 92.56 3.21
 3 12 1 88.68 3.06
 3 12 1 94.37 3.1
 3 -12 1 92.93 3.08
 3 -12 1 95.32 3.41
 -3 -12 -1 92.16 3.13
 -3 -12 -1 84.78 3.11
 -3 12 -2 173.28 5.42
 -3 12 -2 172.83 5.57
 3 12 2 171.84 5.94
 3 12 2 179 5.72
 3 -12 2 165.14 5.66
 3 -12 2 173.54 5.46
 -3 -12 -2 169.96 5.4
 -3 -12 -2 167.6 5.59
 -3 12 -3 31.65 1.31
 -3 12 -3 31.75 1.17
 3 12 3 33.65 1.38
 3 12 3 29.41 1.36
 3 -12 3 29.52 1.13
 3 -12 3 31.28 1.49
 -3 -12 -3 34.21 1.36
 -3 -12 -3 26.42 1.59
 -3 12 -4 86.74 2.88
 -3 12 -4 89.64 3.09
 3 12 4 80.4 2.95
 3 12 4 81.5 2.89
 3 -12 4 89.19 2.86
 3 -12 4 87.51 2.92
 -3 -12 -4 83.64 2.84
 -3 -12 -4 80.78 3.06
 -3 12 -5 26.08 1.09
 -3 12 -5 24.43 1.13
 3 12 5 26.01 1.22
 3 -12 5 25.87 1.18
 -3 -12 -5 22.88 1.14
 -3 -12 -5 24.07 1.26
 -3 12 -6 0.42 0.61
 -3 12 -6 0.31 0.49
 3 12 6 0.6 0.59
 3 12 6 -0.02 0.43
 3 -12 6 -0.26 0.47
 3 -12 6 0.16 0.67
 -3 -12 -6 -0.03 0.4
 -3 12 -7 1.29 0.73
 -3 12 -7 0.19 0.45
 3 12 7 -0.14 0.39
 3 -12 7 1.23 0.65
 3 -12 7 1.21 0.68
 -3 -12 -7 0.21 0.49
 -3 -12 -7 0.26 0.62
 -3 12 -8 33.46 1.69
 -3 12 -8 30.73 1.53
 3 -12 8 28.94 1.66
 3 -12 8 25.16 1.64
 -3 12 -9 0.41 0.92
 -3 12 -9 0.93 0.53
 3 -12 9 0.15 0.57
 3 -12 9 0.81 0.84
 -3 12 -10 50.11 1.99
 -3 12 -10 45.11 1.96
 3 -12 10 48.68 1.95
 3 -12 10 49.2 2.18
 -3 12 -11 13.3 1.11
 3 -12 11 12.34 1.15
 -3 12 -12 2.44 1.02
 3 -12 12 1.85 1
 -3 13 11 2.66 0.58
 3 13 -11 2.79 1
 3 13 -11 2.31 1.05
 3 -13 -11 2.72 0.6
 -3 -13 11 2.58 0.84
 -3 -13 11 2.38 1.24
 -3 13 10 253.69 8.75
 -3 13 10 247.08 8.04
 3 13 -10 240.98 7.99
 3 13 -10 245.23 8.77
 3 -13 -10 262.24 7.93
 3 -13 -10 271.78 8.1
 -3 -13 10 250.02 8
 -3 -13 10 253.44 8.98
 -3 13 9 8.23 0.88
 -3 13 9 11.88 0.99
 3 13 -9 9.37 0.89
 3 13 -9 10.47 1.07
 3 -13 -9 6.66 0.84
 -3 -13 9 11.8 0.92
 -3 -13 9 9.51 1.28
 -3 13 8 22.2 0.95
 -3 13 8 21.97 1.12
 3 13 -8 23.24 1.31
 3 13 -8 22.93 1.37
 3 -13 -8 22.37 0.99
 3 -13 -8 21.89 1.11
 -3 -13 8 23.31 1.14
 -3 -13 8 22.64 1.66
 -3 13 7 21.97 1.32
 -3 13 7 21.84 1.05
 3 13 -7 25.34 1.28
 3 13 -7 23.86 1.32
 3 -13 -7 23 1
 3 -13 -7 21.44 1.08
 -3 -13 7 22.99 1.05
 -3 -13 7 25.7 1.57
 -3 13 6 84.76 2.78
 -3 13 6 80.69 2.91
 3 13 -6 92.25 3.17
 3 13 -6 84.86 2.97
 3 -13 -6 86.95 2.86
 -3 -13 6 85.2 2.92
 -3 -13 6 86.47 3.26
 -3 13 5 5.51 0.6
 -3 13 5 7.21 0.6
 3 13 -5 6.66 0.67
 3 13 -5 6.91 0.87
 3 -13 -5 7.77 0.57
 3 -13 -5 7.15 0.57
 -3 -13 5 7.32 0.8
 -3 -13 5 7.43 1.07
 -3 13 4 2.04 0.61
 -3 13 4 1.29 0.44
 3 13 -4 1.48 0.52
 3 13 -4 1.52 0.66
 3 -13 -4 1.38 0.43
 3 -13 -4 1.48 0.5
 -3 -13 4 0.56 0.51
 -3 -13 4 0.87 0.84
 -3 13 3 19.27 0.97
 -3 13 3 16.26 0.86
 3 13 -3 17.81 0.96
 3 13 -3 21.76 1.05
 3 -13 -3 20.96 0.89
 -3 -13 3 18.58 1.07
 -3 -13 3 20.96 1.02
 -3 13 2 149.84 5
 3 13 -2 148.71 5.25
 3 13 -2 153.97 4.94
 3 -13 -2 145.22 4.94
 3 -13 -2 148.3 4.89
 -3 -13 2 156.18 5.01
 -3 -13 2 153.46 4.96
 -3 13 1 2.61 0.49
 -3 13 1 2.63 0.42
 3 13 -1 3.05 0.56
 3 13 -1 3.74 0.67
 3 -13 -1 3.67 0.44
 3 -13 -1 3.13 0.38
 -3 -13 1 3.52 0.43
 -3 -13 1 3.06 0.81
 -3 13 0 4.7 0.56
 -3 13 0 4.63 0.56
 3 13 0 5.47 0.66
 3 13 0 6.49 0.77
 3 -13 0 4.65 0.5
 3 -13 0 5.79 0.57
 -3 -13 0 5.28 0.52
 -3 -13 0 5.15 0.86
 -3 13 -1 13.27 0.81
 -3 13 -1 12.94 0.89
 3 13 1 14.84 1.01
 3 13 1 13.04 0.87
 3 -13 1 13.16 0.77
 3 -13 1 13.23 0.81
 -3 -13 -1 14.4 0.74
 -3 -13 -1 14.41 1
 -3 13 -2 55.76 1.89
 -3 13 -2 52.64 1.83
 3 13 2 51.44 2.09
 3 13 2 49.26 2.03
 3 -13 2 50.06 1.78
 3 -13 2 54.58 1.95
 -3 -13 -2 52.02 1.92
 -3 -13 -2 47.67 1.99
 -3 13 -3 5.58 0.65
 -3 13 -3 5.22 0.59
 3 13 3 5.82 0.65
 3 13 3 4.27 0.63
 3 -13 3 5.94 0.62
 3 -13 3 5.56 0.67
 -3 -13 -3 5.71 0.66
 -3 -13 -3 4.34 0.72
 -3 13 -4 9.33 0.75
 3 13 4 7.37 0.67
 3 -13 4 8.56 0.81
 -3 -13 -4 7.22 0.79
 -3 -13 -4 8.41 1.03
 -3 13 -5 70.89 2.55
 -3 13 -5 69.01 2.43
 3 13 5 68.32 2.85
 3 13 5 70.22 2.72
 3 -13 5 66.69 2.5
 3 -13 5 69.61 2.51
 -3 -13 -5 72.5 2.66
 -3 -13 -5 67.17 2.63
 -3 13 -6 2.24 0.66
 3 13 6 1.05 0.99
 3 -13 6 1.24 0.68
 -3 -13 -6 1.08 1.02
 -3 13 -7 18.14 1.23
 -3 13 -7 18.6 1.13
 3 13 7 14.9 1.13
 3 -13 7 16.32 1.02
 3 -13 7 14.15 1.22
 -3 13 -8 0.07 0.97
 -3 13 -8 0.94 0.7
 3 -13 8 0.42 0.65
 3 -13 8 0.57 0.96
 -3 13 -9 -0.67 1.02
 -3 13 -9 1.35 0.6
 3 -13 9 0.92 0.6
 3 -13 9 0.43 0.95
 -3 13 -10 16.46 1.22
 -3 13 -10 14.57 1.03
 3 -13 10 14.61 0.93
 3 -13 10 15.45 1.22
 -3 13 -11 19.16 1.43
 3 -13 11 19.35 1.34
 -3 14 10 19.16 1.11
 -3 14 10 13.91 0.96
 3 14 -10 14.54 1.33
 3 -14 -10 15.11 0.93
 -3 -14 10 15.87 0.91
 -3 -14 10 14.98 1.57
 -3 14 9 5.44 0.72
 -3 14 9 5.52 0.47
 3 14 -9 7.21 0.72
 3 14 -9 5.67 0.99
 3 -14 -9 6.72 0.62
 -3 -14 9 6.26 0.8
 -3 -14 9 4.47 1.17
 -3 14 8 73.32 2.57
 -3 14 8 68.32 2.81
 3 14 -8 73.71 3.25
 3 -14 -8 69.07 2.72
 3 -14 -8 80.29 2.83
 -3 -14 8 81.08 2.66
 -3 -14 8 69.83 3.59
 -3 14 7 0.46 0.67
 3 14 -7 0.41 0.8
 3 -14 -7 0.18 0.5
 3 -14 -7 0.08 0.51
 -3 -14 7 0.37 0.73
 -3 -14 7 0.09 1.02
 3 14 -6 11.49 0.9
 3 -14 -6 10.95 0.74
 -3 -14 6 10.22 1.05
 -3 -14 6 11.03 1.08
 3 14 -5 3.55 0.68
 3 14 -5 4.92 0.74
 3 -14 -5 4.24 0.59
 -3 -14 5 3.44 0.6
 -3 -14 5 3.25 0.9
 -3 14 4 1.78 0.82
 -3 14 4 1.78 0.48
 3 14 -4 1.85 0.63
 3 14 -4 1.62 0.72
 3 -14 -4 1.38 0.48
 3 -14 -4 1.52 0.59
 -3 -14 4 1.56 0.55
 -3 -14 4 0.9 0.84
 -3 14 3 7.19 0.74
 -3 14 3 6.81 0.55
 3 14 -3 8.18 0.77
 3 14 -3 8.4 0.77
 3 -14 -3 9.08 0.57
 3 -14 -3 8.08 0.7
 -3 -14 3 6.32 0.53
 -3 -14 3 8.41 1.03
 3 14 -2 68.94 2.7
 3 14 -2 73.36 2.48
 3 -14 -2 73.51 2.74
 3 -14 -2 67.98 2.59
 -3 -14 2 72.71 2.58
 -3 -14 2 74.41 2.62
 -3 14 1 0.84 0.47
 -3 14 1 0.61 0.47
 3 14 -1 0.78 0.65
 3 14 -1 0.44 0.63
 3 -14 -1 0.52 0.43
 3 -14 -1 0.6 0.46
 -3 -14 1 0.41 0.51
 -3 -14 1 -0.1 0.92
 -3 14 0 5.2 0.63
 -3 14 0 5.46 0.63
 3 14 0 4.03 0.91
 3 14 0 4.43 0.69
 3 -14 0 4.49 0.5
 3 -14 0 4.53 0.61
 -3 -14 0 5.52 0.64
 -3 -14 0 4.07 0.83
 -3 14 -1 5.85 0.71
 -3 14 -1 6.3 0.63
 3 14 1 6.38 0.69
 3 14 1 7.59 0.72
 3 -14 1 5.98 0.61
 3 -14 1 6.07 0.53
 -3 -14 -1 6.69 0.65
 -3 -14 -1 7.28 0.88
 -3 14 -2 89.28 3.87
 -3 14 -2 87.09 3.31
 3 14 2 91.48 3.17
 3 14 2 87.25 3.26
 3 -14 2 93.92 3.56
 3 -14 2 89.67 3.77
 -3 -14 -2 86.44 3.24
 -3 -14 -2 85.78 3.24
 -3 14 -3 1.6 0.71
 -3 14 -3 1.1 0.69
 3 14 3 1.08 0.84
 3 14 3 0.23 0.57
 3 -14 3 1.79 0.6
 3 -14 3 1.9 0.7
 -3 -14 -3 1.26 0.63
 -3 -14 -3 0.79 1.01
 -3 14 -4 0.46 0.67
 -3 14 -4 0.71 0.55
 3 14 4 0.4 0.68
 3 14 4 0.42 0.49
 3 -14 4 0.55 0.47
 3 -14 4 0.63 0.52
 -3 -14 -4 0.47 0.51
 -3 -14 -4 0.65 0.73
 -3 14 -5 14.89 0.93
 3 14 5 9.41 0.94
 3 -14 5 13.66 0.94
 -3 -14 -5 14.8 1.94
 -3 14 -6 1.22 0.88
 3 14 6 -0.28 0.88
 3 -14 6 0.16 0.52
 -3 -14 -6 0.52 1
 -3 14 -7 3.35 0.77
 -3 14 -7 4.15 0.85
 3 -14 7 4.28 0.8
 3 -14 7 4.87 0.92
 -3 14 -8 0.5 1
 3 -14 8 1.47 0.99
 -3 14 -9 0.62 1.02
 3 -14 9 1.05 0.51
 3 -14 9 -0.02 1
 -3 14 -10 16.65 1.58
 3 -14 10 22.08 1.39
 3 15 -9 3.72 0.99
 3 -15 -9 4.7 0.48
 -3 -15 9 3.71 0.63
 -3 15 8 3.51 0.66
 3 15 -8 4.8 0.96
 3 -15 -8 2.99 0.61
 -3 -15 8 4.39 0.62
 -3 -15 8 5.17 1.12
 -3 15 7 31.75 2
 3 15 -7 41.52 1.71
 3 -15 -7 41.01 1.68
 3 -15 -7 36.81 1.9
 -3 -15 7 43.78 1.9
 -3 -15 7 41.27 1.76
 -3 15 6 22.6 1.25
 3 15 -6 25.34 1.17
 3 15 -6 23.56 1.5
 3 -15 -6 25.37 1.15
 -3 -15 6 25.22 1.43
 -3 -15 6 25.02 1.5
 -3 15 5 82.84 2.91
 -3 15 5 70.07 3.01
 3 15 -5 73.54 2.81
 3 15 -5 81.61 2.76
 3 -15 -5 77.81 2.8
 3 -15 -5 84.11 2.91
 -3 -15 5 80.32 3.24
 -3 -15 5 81.98 2.99
 -3 15 4 -0.26 0.78
 -3 15 4 0.19 0.58
 3 15 -4 -1.34 0.72
 3 15 -4 -0.34 0.83
 3 -15 -4 -0.24 0.51
 3 -15 -4 0.18 0.6
 -3 -15 4 -0.91 0.67
 -3 -15 4 -1.35 0.97
 -3 15 3 61.01 2.3
 -3 15 3 62.75 2.29
 3 15 -3 62.84 2.35
 3 15 -3 63.91 2.47
 3 -15 -3 60.05 2.11
 3 -15 -3 61.74 2.55
 -3 -15 3 63.1 2.3
 -3 -15 3 63.74 2.4
 -3 15 2 11.35 0.8
 -3 15 2 14.95 1.28
 3 15 -2 15.74 1.08
 3 15 -2 16.61 1.07
 -3 -15 2 10.42 0.92
 -3 -15 2 15.11 1.3
 -3 15 1 0.03 0.53
 -3 15 1 1.23 0.78
 3 15 -1 0.28 0.8
 3 15 -1 0.59 0.82
 3 -15 -1 0.1 0.55
 3 -15 -1 -0.12 0.53
 -3 -15 1 0.09 0.62
 -3 -15 1 0.14 0.78
 -3 15 0 64.41 2.52
 -3 15 0 69.02 2.53
 3 15 0 64.81 2.59
 3 15 0 66.14 2.72
 3 -15 0 71.36 2.54
 3 -15 0 67.99 2.57
 -3 -15 0 70.07 2.46
 -3 -15 0 74.28 2.68
 -3 15 -1 11.59 1.08
 -3 15 -1 14.29 0.86
 3 15 1 13.53 1
 3 15 1 11.38 1
 3 -15 1 15.62 0.87
 3 -15 1 11.88 1.06
 -3 -15 -1 11.21 0.83
 -3 -15 -1 13.71 1.25
 -3 15 -2 9.06 0.91
 -3 15 -2 10.34 0.81
 3 15 2 6.8 1.02
 3 15 2 9.93 1.01
 3 -15 2 9.02 0.62
 3 -15 2 9.88 0.91
 -3 -15 -2 9.66 0.92
 -3 -15 -2 6.61 1.08
 -3 15 -3 23.14 1.23
 -3 15 -3 19.43 0.95
 3 15 3 20.3 1.3
 3 -15 3 20.97 0.97
 3 -15 3 23.47 1.22
 -3 -15 -3 19.59 1.17
 -3 -15 -3 19.77 1.47
 -3 15 -4 7.42 1.27
 -3 15 -4 5.91 1.08
 3 15 4 5.31 0.83
 3 -15 4 8.13 1.1
 3 -15 4 8.01 1.38
 -3 -15 -4 7.56 1.15
 -3 -15 -4 5.43 0.92
 -3 15 -5 4.47 0.89
 3 -15 5 6.6 0.86
 3 -15 5 4.54 0.93
 -3 15 -6 140.72 4.96
 -3 15 -6 138.91 5.11
 3 -15 6 132.95 4.47
 3 -15 6 132.74 4.78
 -3 -15 -6 129.53 5.07
 -3 -15 -6 138.13 5.02
 -3 15 -7 91.48 3.73
 -3 15 -7 86.83 3.17
 3 15 7 88.83 3.64
 3 -15 7 89.65 3.65
 3 -15 7 88.86 3.32
 -3 15 -8 5.45 1.15
 3 -15 8 4.53 1.01
 3 16 -7 15.68 1.43
 3 16 -7 13.59 1.44
 3 -16 -7 12.97 0.87
 -3 -16 7 14.9 1.04
 -3 -16 7 14.99 1.32
 -3 16 6 15.78 1.05
 3 16 -6 14.77 1.34
 3 16 -6 17.16 1.21
 3 -16 -6 15.61 0.96
 -3 -16 6 12.18 0.89
 -3 -16 6 14.15 1.34
 -3 16 5 9.8 1.09
 -3 16 5 9.42 0.87
 3 16 -5 11.87 1.03
 3 16 -5 10.75 1.06
 3 -16 -5 10.18 0.77
 3 -16 -5 10.51 0.81
 -3 -16 5 8.03 0.74
 -3 -16 5 12.01 1
 -3 16 4 46.83 1.95
 -3 16 4 42.47 2.65
 3 16 -4 51.12 1.96
 3 16 -4 54.66 2.01
 3 -16 -4 47.09 2.11
 3 -16 -4 50.63 1.86
 -3 -16 4 40.53 2.1
 -3 -16 4 55.48 2.32
 -3 16 3 77.74 2.68
 -3 16 3 79.04 2.59
 3 16 -3 76.36 2.8
 3 16 -3 78.61 3.28
 3 -16 -3 79.12 2.82
 3 -16 -3 80.71 2.74
 -3 -16 3 68.75 2.88
 -3 -16 3 81.4 3.05
 -3 16 2 34.16 1.32
 3 16 -2 31.22 2.03
 3 16 -2 32.26 2.05
 -3 -16 2 34.21 1.34
 -3 -16 2 36.17 1.77
 3 16 -1 -0.68 0.79
 3 16 -1 -0.88 1
 3 -16 -1 0.79 0.62
 -3 -16 1 0.19 0.61
 -3 -16 1 0.88 1.23
 -3 16 0 2.59 0.72
 -3 16 0 2.41 0.65
 3 16 0 2.31 0.87
 3 16 0 2.99 0.94
 3 -16 0 2.15 0.63
 3 -16 0 2.48 0.78
 -3 -16 0 1.39 0.5
 -3 -16 0 3.46 1.25
 -3 16 -1 119.99 4.11
 -3 16 -1 110.33 4.03
 3 16 1 122.19 4.71
 3 16 1 122.78 4.07
 3 -16 1 107.39 4.03
 3 -16 1 120.83 4.18
 -3 -16 -1 124.39 4.09
 -3 -16 -1 121.01 4.02
 -3 16 -2 2.85 0.86
 3 16 2 1.3 0.99
 3 -16 2 2.54 0.84
 -3 -16 -2 0.22 1.16
 -3 16 -3 1.53 0.84
 3 16 3 1.52 0.8
 3 -16 3 1.85 0.87
 -3 -16 -3 1.93 0.9
 -3 -16 -3 1.62 1.08
 -3 16 -4 -0.56 0.8
 -3 16 -4 -0.42 0.88
 3 -16 4 0.39 0.84
 3 -16 4 0.39 0.81
 -3 16 -5 11.66 1.24
 -3 16 -5 13.48 0.97
 3 -16 5 16.54 0.99
 3 -16 5 12.93 1.24
 -3 16 -6 7.9 1.06
 -3 16 -6 7.98 0.97
 3 -16 6 7.58 0.92
 3 -16 6 6.86 1.08
 -3 -16 -6 5.26 1.8
 -3 17 4 14.51 0.94
 3 17 -4 14.41 1.06
 3 17 -4 11.7 1.3
 3 -17 -4 13.31 1
 -3 -17 4 12.1 0.93
 -3 -17 4 12.95 1.38
 -3 17 3 3.12 0.67
 3 17 -3 3.22 0.93
 -3 -17 3 3.05 1.17
 3 17 -2 28.59 1.65
 -3 -17 2 27.4 1.73
 3 17 -1 -0.46 0.92
 3 17 -1 0.34 1.17
 -3 -17 1 0.43 1.29
 -3 17 0 0.27 0.71
 -3 17 0 0.63 0.47
 3 17 0 0.06 1.04
 3 -17 0 0.09 0.42
 3 -17 0 0.63 0.77
 -3 -17 0 -0.12 0.83
 -3 -17 0 0.73 1.32
 -3 17 -1 9.38 0.97
 3 17 1 6.9 1.11
 3 -17 1 8.4 1
 -3 -17 -1 7.26 1.44
 -3 17 -2 72.73 2.64
 3 17 2 70.3 2.7
 3 -17 2 70.33 2.65
 -3 -17 -2 66.4 2.91
 -3 17 -3 1.31 0.92
 -3 17 -3 1.86 0.91
 3 17 3 2.35 0.93
 3 -17 3 2.18 0.85
 3 -17 3 1.51 0.92
 -3 17 -4 0.89 0.84
 -3 17 -4 0.6 0.75
 3 -17 4 0.44 0.7
 3 -17 4 0.5 0.86
 -4 0 13 49.77 1.92
 -4 0 13 47.91 1.77
 4 0 -13 49.22 1.81
 4 0 -13 50.24 2.27
 -4 0 12 19.5 1
 -4 0 12 16.01 1.22
 4 0 -12 16.28 1.26
 4 0 -12 21.16 1.13
 -4 0 11 93.75 3.32
 -4 0 11 94.03 3.26
 4 0 -11 101.17 3.31
 4 0 -11 104.14 3.54
 -4 0 10 6.76 0.69
 -4 0 10 4.14 0.82
 -4 0 9 108.12 3.75
 -4 0 9 109.57 3.6
 4 0 -9 106 3.56
 4 0 -9 104.98 3.45
 -4 0 8 1.66 0.49
 -4 0 8 3.49 0.68
 4 0 -8 2.44 0.57
 4 0 -8 2.7 0.6
 -4 0 7 59.89 2.03
 -4 0 7 60.83 2.09
 4 0 -7 59.98 2.09
 4 0 -7 58.59 2.08
 -4 0 6 258.6 8.09
 -4 0 6 255.82 8.01
 4 0 -6 249.86 7.95
 4 0 -6 253.48 8.17
 -4 0 5 34.31 1.4
 -4 0 5 33.86 1.5
 4 0 -5 28.11 1.42
 4 0 -5 31.7 1.36
 -4 0 4 17.65 0.89
 -4 0 4 20.02 0.88
 4 0 -4 20.62 0.93
 4 0 -4 20.53 0.97
 -4 0 3 3.48 0.37
 -4 0 3 3.24 0.46
 4 0 -3 4.58 0.47
 4 0 -3 3.4 0.53
 -4 0 2 0.61 0.27
 -4 0 2 0.99 0.43
 4 0 -2 1.05 0.36
 4 0 -2 0.6 0.44
 -4 0 1 19.04 0.81
 -4 0 1 18.97 0.9
 4 0 -1 19.15 0.8
 4 0 -1 18.81 0.87
 -4 0 0 76.73 2.85
 4 0 0 79.37 2.8
 4 0 0 71.9 2.7
 -4 0 -1 195 6.19
 -4 0 -1 191.13 6.11
 4 0 1 193.34 6.12
 4 0 1 188.17 6.11
 -4 0 -2 11.8 0.56
 -4 0 -2 12.65 0.7
 4 0 2 12.03 0.61
 4 0 2 12.19 0.65
 -4 0 -3 7.62 0.46
 -4 0 -3 6.9 0.6
 4 0 3 7.38 0.51
 4 0 3 6.95 0.52
 -4 0 -4 3.43 0.37
 -4 0 -4 4.64 0.82
 4 0 4 4.24 0.42
 4 0 4 3.77 0.59
 -4 0 -5 127.28 4.31
 -4 0 -5 133.76 4.49
 4 0 5 143.24 4.42
 4 0 5 124.14 4.38
 -4 0 -6 55.9 1.92
 -4 0 -6 56.83 2.04
 4 0 6 52 2.15
 4 0 6 52.62 1.9
 -4 0 -7 421.16 12.99
 -4 0 -7 391.6 12.32
 4 0 7 400.46 13.02
 -4 0 -8 1.15 0.38
 -4 0 -9 49.35 1.68
 4 0 9 48.33 1.7
 -4 0 -11 57.54 1.99
 -4 1 13 1.92 0.53
 4 -1 -13 1.98 0.82
 -4 1 12 -0.24 0.47
 4 1 -12 0.77 0.85
 4 -1 -12 -0.37 0.72
 -4 -1 12 0.37 0.49
 -4 1 11 8.04 0.65
 -4 1 11 8.45 0.72
 4 1 -11 7.98 0.82
 4 1 -11 12.24 0.88
 4 -1 -11 10.44 0.69
 4 -1 -11 8.72 0.88
 -4 -1 11 10.8 0.7
 -4 1 10 32.26 1.18
 -4 1 10 29.69 1.31
 4 1 -10 27.87 1.48
 4 1 -10 27.61 1.81
 4 -1 -10 29.53 1.39
 -4 1 9 9.74 0.58
 4 1 -9 8.31 0.7
 4 1 -9 9.34 0.65
 4 -1 -9 8.65 0.61
 4 -1 -9 8.16 0.62
 -4 -1 9 9.15 0.56
 -4 -1 9 9.4 0.72
 -4 1 8 66.66 2.58
 -4 1 8 66.8 2.29
 4 1 -8 58.16 2.51
 4 1 -8 69.45 2.24
 4 -1 -8 54.64 2.35
 4 -1 -8 62.02 2.77
 -4 -1 8 66.81 2.33
 -4 -1 8 65.98 2.45
 -4 1 7 6.78 0.44
 -4 1 7 6.58 0.55
 4 1 -7 8.96 0.74
 4 1 -7 9.53 1.28
 4 -1 -7 6.47 0.55
 4 -1 -7 6.24 0.57
 -4 -1 7 10.02 0.71
 -4 1 6 36.19 1.77
 -4 1 6 42.43 1.51
 4 1 -6 37.06 1.8
 4 1 -6 41.79 1.58
 4 -1 -6 40.21 1.42
 4 -1 -6 39.93 1.85
 -4 -1 6 44.46 1.4
 -4 -1 6 39.78 1.91
 -4 1 5 95.36 3.24
 -4 1 5 96.51 3.29
 4 1 -5 99.84 3.46
 4 1 -5 94.17 3.18
 4 -1 -5 94 3.22
 4 -1 -5 99.17 3.34
 -4 -1 5 98.89 3.12
 -4 -1 5 103.95 3.38
 -4 1 4 16.62 0.73
 -4 1 4 14.72 0.77
 4 1 -4 15.26 0.82
 4 1 -4 15.9 0.84
 4 -1 -4 15.72 0.78
 4 -1 -4 16.3 0.79
 -4 -1 4 16.23 0.66
 -4 -1 4 15.64 0.8
 -4 1 3 17.29 1.21
 -4 1 3 13.43 1.06
 4 1 -3 12.56 0.64
 4 1 -3 11.58 0.7
 4 -1 -3 12.52 1.07
 4 -1 -3 14.27 1.16
 -4 -1 3 11.89 0.59
 -4 -1 3 11.35 0.68
 -4 1 2 18.3 0.82
 -4 1 2 18.38 0.81
 4 1 -2 17.38 0.87
 4 1 -2 16.04 0.85
 4 -1 -2 16.93 0.75
 4 -1 -2 18.03 0.9
 -4 -1 2 15.93 0.79
 -4 -1 2 17.14 0.83
 -4 1 1 67.6 2.55
 -4 1 1 72.52 2.56
 4 1 -1 80.09 2.53
 4 1 -1 77.6 2.64
 4 -1 -1 70.69 2.54
 4 -1 -1 69.9 2.51
 -4 -1 1 81.34 2.59
 -4 -1 1 83.71 2.6
 -4 1 0 27.15 1.01
 -4 1 0 26.89 1.11
 4 1 0 27.14 1.32
 4 1 0 24.08 1.06
 4 -1 0 26.45 1.02
 4 -1 0 26.06 1.07
 -4 -1 0 25.55 1.1
 -4 -1 0 27.76 1.48
 -4 1 -1 48.68 1.57
 -4 1 -1 42.99 1.6
 4 1 1 47.45 1.66
 4 1 1 40.95 1.77
 4 -1 1 43.68 1.73
 4 -1 1 44.2 1.8
 -4 -1 -1 47.85 1.87
 -4 1 -2 10.8 0.55
 -4 1 -2 9.49 0.62
 4 1 2 9.69 0.63
 4 1 2 8.25 0.56
 4 -1 2 9.99 0.55
 4 -1 2 9.85 0.65
 -4 -1 -2 8.94 0.52
 -4 -1 -2 9.21 0.6
 -4 1 -3 38.13 1.4
 -4 1 -3 30.98 1.66
 4 1 3 38.92 1.32
 4 1 3 34.29 1.36
 4 -1 3 37.9 1.26
 4 -1 3 38.01 1.48
 -4 -1 -3 36.96 1.32
 -4 -1 -3 37.67 1.53
 -4 1 -4 15.58 0.77
 -4 1 -4 16.07 1.1
 4 -1 4 16.06 0.9
 4 -1 4 17.33 0.94
 -4 -1 -4 16.98 1.01
 -4 1 -5 9.13 0.55
 -4 1 -5 9.97 0.64
 4 1 5 8.86 0.59
 4 -1 5 9.83 0.57
 4 -1 5 9.3 0.64
 -4 -1 -5 9.09 0.53
 -4 -1 -5 10.69 0.93
 -4 1 -6 79.42 2.6
 -4 1 -6 78.52 2.61
 4 1 6 78.49 2.64
 4 1 6 81.08 2.8
 4 -1 6 75.97 2.65
 4 -1 6 79.48 2.74
 -4 -1 -6 82.25 2.64
 -4 -1 -6 75.56 2.63
 -4 1 -7 0.52 0.32
 -4 1 -7 0.45 0.34
 4 1 7 0.26 0.36
 4 -1 7 0.39 0.36
 4 -1 7 0.59 0.59
 -4 -1 -7 0.43 0.35
 -4 -1 -7 -0.19 0.35
 -4 1 -8 60.73 2.3
 -4 1 -8 59.45 1.98
 4 -1 8 57.74 2.03
 4 -1 8 57.97 2.32
 -4 1 -9 32.69 1.39
 -4 1 -9 28.89 1.23
 4 1 9 29.79 1.17
 4 1 9 27.37 1.45
 4 -1 9 25.8 1.39
 -4 -1 -9 28.87 1.08
 -4 1 -11 1.1 0.58
 4 -1 11 0.55 0.58
 -4 2 12 13.19 0.81
 4 -2 -12 14.62 0.86
 -4 2 11 0.72 0.53
 -4 2 11 0.08 0.48
 4 -2 -11 0.16 0.4
 -4 2 10 47.89 1.76
 4 2 -10 40.13 2.1
 4 -2 -10 50.18 1.72
 4 -2 -10 52.71 1.95
 -4 -2 10 41.4 1.85
 4 2 -9 7.49 0.7
 4 2 -9 8.64 0.79
 4 -2 -9 8.32 0.82
 -4 -2 9 10.81 0.64
 -4 -2 9 8.06 0.74
 -4 2 8 3.33 0.42
 -4 2 8 3.69 0.47
 4 2 -8 4.36 0.62
 4 2 -8 4.5 0.67
 4 -2 -8 3.29 0.46
 4 -2 -8 2.95 0.6
 -4 -2 8 6.57 0.59
 -4 -2 8 5.27 0.7
 -4 2 7 125.28 3.93
 -4 2 7 123.38 4.09
 4 2 -7 124.96 4.13
 4 2 -7 127.5 4.15
 4 -2 -7 118.7 4.15
 4 -2 -7 127.17 3.99
 -4 -2 7 128.83 4.11
 -4 -2 7 127.8 4.19
 -4 2 6 355.1 11.31
 -4 2 6 330.12 10.86
 4 2 -6 339.84 11.37
 4 2 -6 343.43 10.9
 4 -2 -6 334.47 10.8
 4 -2 -6 360.48 11.11
 -4 -2 6 350.03 11.01
 -4 -2 6 350.28 11.1
 -4 2 5 63.87 2.21
 -4 2 5 64.14 2.38
 4 2 -5 58.21 2.21
 4 2 -5 59.57 2.13
 4 -2 -5 59.24 2.26
 4 -2 -5 66.53 2.39
 -4 -2 5 61.85 2.22
 -4 -2 5 61.84 2.41
 -4 2 4 35.93 1.67
 -4 2 4 37.47 1.59
 4 2 -4 40.22 1.53
 4 2 -4 40.02 1.6
 4 -2 -4 36.65 1.59
 4 -2 -4 40.12 1.67
 -4 -2 4 41.94 1.52
 -4 -2 4 40.8 1.73
 -4 2 3 0.35 0.29
 -4 2 3 0.64 0.39
 4 2 -3 2.58 0.41
 4 2 -3 2.03 0.52
 4 -2 -3 0.25 0.35
 4 -2 -3 0.06 0.45
 -4 -2 3 2.24 0.43
 -4 -2 3 3.17 0.56
 -4 2 2 13.08 0.68
 -4 2 2 14 0.71
 4 2 -2 14.45 0.69
 4 2 -2 12.23 0.73
 4 -2 -2 12.2 0.66
 4 -2 -2 14.02 0.99
 -4 -2 2 13.36 0.78
 -4 -2 2 14.65 0.8
 -4 2 1 0.93 0.37
 -4 2 1 1.2 0.38
 4 2 -1 0.92 0.38
 4 2 -1 0.8 0.43
 4 -2 -1 0.52 0.3
 4 -2 -1 1.05 0.66
 -4 -2 1 0.48 0.46
 -4 -2 1 0.46 0.49
 -4 2 0 24.63 0.99
 -4 2 0 20.19 0.9
 4 2 0 22.11 0.94
 4 2 0 20.68 0.99
 4 -2 0 21.28 0.88
 4 -2 0 24.02 1.36
 -4 -2 0 21.6 0.93
 -4 -2 0 22.31 1.11
 -4 2 -1 4.49 0.43
 -4 2 -1 3.49 0.48
 4 2 1 4.86 0.42
 4 2 1 4.25 0.46
 4 -2 1 4.83 0.44
 -4 -2 -1 4.34 0.39
 -4 -2 -1 4.73 0.52
 -4 2 -2 54.33 2.09
 -4 2 -2 48.07 2.2
 4 2 2 60.94 1.9
 4 2 2 63.18 2.11
 4 -2 2 52.75 1.91
 4 -2 2 52.96 1.98
 -4 -2 -2 63.94 1.95
 -4 -2 -2 61.38 2.07
 -4 2 -3 10.67 0.62
 -4 2 -3 12.21 0.66
 4 2 3 10.64 0.62
 4 2 3 9.46 0.64
 4 -2 3 10.51 0.58
 4 -2 3 11.6 0.69
 -4 -2 -3 9.06 0.56
 -4 -2 -3 10.6 0.66
 -4 2 -4 2.91 0.38
 -4 2 -4 3.03 0.37
 4 2 4 2.15 0.37
 4 2 4 2.07 0.44
 4 -2 4 2.79 0.38
 4 -2 4 1.51 0.48
 -4 -2 -4 2.2 0.32
 -4 -2 -4 2.17 0.56
 -4 2 -5 34.07 1.39
 -4 2 -5 37.03 1.5
 4 -2 5 37.44 1.57
 4 -2 5 36.46 1.46
 -4 2 -6 3.28 0.72
 -4 2 -6 2.43 0.72
 4 2 6 2.26 0.41
 4 -2 6 1.71 0.44
 4 -2 6 2.46 0.51
 -4 -2 -6 1.71 0.35
 -4 -2 -6 1.43 0.46
 -4 2 -7 617.66 19.26
 -4 2 -7 572.6 18.97
 4 2 7 605.56 19.59
 4 2 7 631.41 18.96
 4 -2 7 580.4 18.69
 4 -2 7 624.52 19.31
 -4 -2 -7 629.89 18.82
 -4 -2 -7 600.53 18.91
 -4 2 -8 23.79 0.97
 4 2 8 20.87 1.12
 4 2 8 23.74 1.09
 4 -2 8 25.02 1.05
 4 -2 8 28.51 1.72
 -4 -2 -8 24.71 1.1
 -4 2 -9 0.58 0.99
 4 2 9 1.22 0.45
 4 -2 9 0.85 1.38
 -4 -2 -9 1.75 0.48
 -4 2 -10 8.09 0.67
 -4 2 -11 30.11 1.27
 -4 3 12 9.71 0.78
 -4 3 11 15.11 0.89
 4 -3 -11 15.09 0.95
 -4 3 10 0.82 0.43
 4 -3 -10 -0.25 0.6
 -4 3 9 5.93 0.62
 -4 3 9 4.98 0.63
 4 3 -9 6.46 0.55
 4 3 -9 6.75 0.7
 -4 -3 9 5.8 0.49
 -4 -3 9 6.39 0.66
 -4 3 8 23.69 0.94
 4 3 -8 19.52 1.05
 4 3 -8 20.02 1.07
 4 -3 -8 19.91 0.91
 4 -3 -8 21.26 1.1
 -4 -3 8 21.16 0.99
 -4 -3 8 20.41 1.01
 -4 3 7 3.71 0.48
 -4 3 7 2.91 0.47
 4 3 -7 3.2 0.48
 4 3 -7 3.96 0.66
 4 -3 -7 1.68 0.41
 4 -3 -7 3.04 0.48
 -4 -3 7 3.47 0.45
 -4 -3 7 3.06 0.57
 -4 3 6 51.7 2.02
 -4 3 6 55.47 1.96
 4 3 -6 59.23 2.32
 4 3 -6 58.8 2.33
 4 -3 -6 50.28 1.86
 4 -3 -6 58.92 2.21
 -4 -3 6 61.17 2
 -4 -3 6 56.58 2.52
 -4 3 5 165.3 5.35
 -4 3 5 176.03 5.6
 4 3 -5 171.86 5.59
 4 3 -5 182.61 5.91
 4 -3 -5 158.97 5.54
 4 -3 -5 166.64 5.51
 -4 -3 5 176.74 5.66
 -4 -3 5 172.55 5.51
 -4 3 4 56.24 1.95
 -4 3 4 58.71 2.16
 4 3 -4 53.78 2.15
 4 3 -4 49.93 2.07
 4 -3 -4 49.34 1.91
 -4 -3 4 49.91 2.14
 -4 -3 4 48.55 1.78
 -4 3 3 0.44 0.41
 -4 3 3 0.45 0.42
 4 3 -3 -0.32 0.4
 4 3 -3 0.19 0.51
 4 -3 -3 0.15 0.37
 4 -3 -3 0.39 0.57
 -4 -3 3 -0.17 0.35
 -4 -3 3 -0.05 0.51
 -4 3 2 0.07 0.32
 -4 3 2 0.5 0.35
 4 3 -2 0.02 0.4
 4 3 -2 -0.29 0.47
 4 -3 -2 0.02 0.38
 4 -3 -2 -0.39 0.47
 -4 -3 2 -0.3 0.35
 -4 -3 2 0.06 0.53
 -4 3 1 116.08 3.87
 -4 3 1 115.83 3.78
 4 3 -1 125.44 3.93
 4 3 -1 115.48 3.77
 4 -3 -1 113.13 3.71
 4 -3 -1 114.71 3.79
 -4 -3 1 118.2 3.93
 -4 -3 1 115.25 3.81
 -4 3 0 123.26 3.93
 -4 3 0 119.78 4.15
 4 3 0 124.61 3.93
 4 3 0 123.39 4.03
 4 -3 0 125.25 4.15
 4 -3 0 121.8 4.06
 -4 -3 0 128.05 4.14
 -4 -3 0 121.97 4.02
 -4 3 -1 3.34 0.55
 -4 3 -1 2 0.48
 4 3 1 2.68 0.41
 4 3 1 2.41 0.51
 4 -3 1 2.82 0.48
 4 -3 1 3.9 0.65
 -4 -3 -1 2.82 0.4
 -4 -3 -1 2.3 0.55
 -4 3 -2 2.33 0.35
 -4 3 -2 2.65 0.4
 4 3 2 2.33 0.47
 4 3 2 1.39 0.41
 4 -3 2 3.06 0.49
 4 -3 2 3.41 0.53
 -4 -3 -2 2.91 0.42
 -4 -3 -2 1.94 0.56
 -4 3 -3 41.29 1.53
 -4 3 -3 44.4 1.55
 4 3 3 45.63 1.59
 4 3 3 50.23 1.74
 4 -3 3 46.78 1.56
 4 -3 3 46.19 1.74
 -4 -3 -3 46.79 1.61
 -4 -3 -3 43.18 1.58
 -4 3 -4 2.69 0.32
 -4 3 -4 3.75 0.56
 4 3 4 2.34 0.5
 4 3 4 2.82 0.72
 4 -3 4 1.96 0.46
 4 -3 4 3.31 0.66
 -4 -3 -4 2.33 0.65
 -4 -3 -4 2.33 0.52
 -4 3 -5 1.87 0.31
 -4 3 -5 1.43 0.44
 4 3 5 3.35 0.44
 4 3 5 1.42 0.47
 4 -3 5 1.87 0.36
 4 -3 5 1.51 0.58
 -4 -3 -5 2.41 0.35
 -4 -3 -5 3.56 0.49
 -4 3 -6 212.25 7.1
 -4 3 -6 239.09 7.41
 4 -3 6 232.08 7.51
 4 -3 6 226.72 7.36
 -4 -3 -6 215.39 7.01
 -4 -3 -6 220.32 7.77
 -4 3 -7 12.51 0.63
 -4 3 -7 14.72 0.69
 4 3 7 11.13 0.72
 4 -3 7 13.88 0.67
 4 -3 7 13.19 0.95
 -4 -3 -7 11.81 0.74
 -4 -3 -7 10.55 0.68
 -4 3 -8 6.1 0.48
 4 -3 8 5.72 0.49
 4 -3 8 5 0.67
 -4 3 -9 3.72 0.51
 4 3 9 4.11 0.42
 4 -3 9 2.87 0.67
 -4 -3 -9 3.65 0.5
 -4 3 -10 88.37 3.25
 -4 3 -10 84.27 2.89
 4 -3 10 82.59 3.32
 -4 3 -11 7.45 0.57
 -4 3 -11 9.79 0.65
 4 -4 -13 17.93 0.92
 -4 4 12 8.03 0.64
 4 4 -12 5.44 0.83
 4 -4 -12 6.16 0.5
 4 -4 -12 6.29 0.63
 -4 4 11 40.87 1.53
 4 -4 -11 39.71 1.59
 -4 4 10 3.81 0.59
 4 -4 -10 3.26 0.55
 4 -4 -10 2.45 0.71
 -4 4 9 29.53 1.26
 -4 4 9 25.85 1.13
 4 4 -9 25.52 1.14
 4 4 -9 24.35 1.38
 4 -4 -9 22.42 1.31
 4 -4 -9 29.55 1.14
 -4 -4 9 22.46 1.35
 -4 -4 9 24.6 1.36
 4 4 -8 16.8 0.85
 4 4 -8 15.06 1.03
 4 -4 -8 16.89 0.72
 4 -4 -8 16.78 0.82
 -4 -4 8 14.39 0.97
 -4 -4 8 15.96 1.09
 -4 4 7 5.62 0.44
 -4 4 7 6.66 0.59
 4 4 -7 5.33 0.56
 4 4 -7 6.47 0.65
 4 -4 -7 5.13 0.46
 4 -4 -7 5.62 0.65
 -4 -4 7 6.11 0.45
 -4 -4 7 6.09 0.7
 -4 4 6 2.02 0.55
 -4 4 6 5.98 0.75
 4 4 -6 3.9 1.17
 4 4 -6 2.29 0.46
 4 -4 -6 4.1 0.52
 4 -4 -6 2.74 0.88
 -4 -4 6 1.95 0.58
 -4 -4 6 2.39 1.1
 -4 4 5 52.96 1.88
 -4 4 5 52.85 1.91
 4 4 -5 48.22 1.81
 4 4 -5 54.89 1.8
 4 -4 -5 47.52 1.74
 4 -4 -5 55.25 2.33
 -4 -4 5 49.94 1.82
 -4 -4 5 52.62 1.87
 -4 4 4 64.03 2.19
 -4 4 4 62.44 2.11
 4 4 -4 60.1 2.13
 4 4 -4 60.6 2.2
 4 -4 -4 58.38 1.98
 4 -4 -4 62.79 2.19
 -4 -4 4 58.18 2.25
 -4 -4 4 64.75 2.17
 -4 4 3 8.95 0.56
 -4 4 3 9.26 0.59
 4 4 -3 9.39 0.65
 4 4 -3 10.35 0.81
 4 -4 -3 7.39 0.57
 4 -4 -3 8.25 0.57
 -4 -4 3 9.32 0.58
 -4 -4 3 10.01 0.79
 -4 4 2 71.93 2.76
 -4 4 2 71.09 2.46
 4 4 -2 71.09 2.59
 4 4 -2 68.8 2.51
 4 -4 -2 71.78 2.48
 4 -4 -2 73.43 2.85
 -4 -4 2 69.46 2.43
 -4 -4 2 69.78 2.52
 -4 4 1 46.11 1.59
 -4 4 1 46.77 1.69
 4 4 -1 49.62 1.7
 4 4 -1 47.57 1.69
 4 -4 -1 46.63 1.71
 4 -4 -1 46.66 1.81
 -4 -4 1 45.47 1.59
 -4 -4 1 45.59 1.7
 -4 4 0 10.1 0.53
 -4 4 0 8.93 0.59
 4 4 0 10.75 0.59
 4 4 0 11.84 0.66
 4 -4 0 9.74 0.55
 4 -4 0 9.9 0.67
 -4 -4 0 9.71 0.46
 -4 -4 0 11.13 0.71
 -4 4 -1 39.52 1.29
 -4 4 -1 36.88 1.33
 4 4 1 40.87 1.4
 4 4 1 37.34 1.38
 4 -4 1 33.92 1.48
 4 -4 1 37.3 1.48
 -4 -4 -1 36.2 1.4
 -4 -4 -1 38.33 1.48
 -4 4 -2 54.32 1.94
 -4 4 -2 52.14 1.77
 4 4 2 56.88 1.95
 4 4 2 50.59 1.89
 4 -4 2 54.02 1.81
 4 -4 2 56.76 2.46
 -4 -4 -2 51.12 1.86
 -4 -4 -2 52.75 1.98
 -4 4 -3 107.16 3.86
 -4 4 -3 122.2 4.65
 4 4 3 107.98 3.55
 4 4 3 107.1 3.61
 4 -4 3 118.94 4
 4 -4 3 104.34 4.32
 -4 -4 -3 96.64 3.56
 -4 -4 -3 119.81 4.04
 -4 4 -4 6.52 0.5
 -4 4 -4 7.71 0.56
 4 4 4 4.38 0.47
 4 -4 4 7.8 0.59
 4 -4 4 6.02 0.71
 -4 -4 -4 6.9 0.52
 -4 -4 -4 4.86 0.55
 -4 4 -5 87.21 2.86
 -4 4 -5 88.27 3.05
 4 4 5 84.3 2.85
 4 4 5 84.6 2.86
 4 -4 5 87.82 2.97
 4 -4 5 84.1 3
 -4 -4 -5 88.67 2.86
 -4 -4 -5 86.97 3.14
 -4 4 -6 32.95 1.23
 -4 4 -6 31.1 1.22
 4 4 6 34.24 1.33
 4 -4 6 33.22 1.18
 4 -4 6 28.07 1.42
 -4 -4 -6 34.9 1.67
 -4 4 -7 39.1 1.34
 -4 4 -7 36.62 1.33
 4 4 7 34.71 1.31
 4 -4 7 34.75 1.37
 4 -4 7 32.9 1.43
 -4 -4 -7 29.24 1.74
 -4 4 -8 10.06 0.58
 -4 4 -8 8.47 0.58
 4 -4 8 9.06 0.67
 4 -4 8 6.73 0.88
 -4 -4 -8 8.76 0.52
 -4 4 -9 75.57 2.65
 4 -4 10 -0.41 0.55
 4 -4 10 1.16 0.83
 -4 4 -11 31.16 1.3
 -4 4 -12 51 2.02
 4 -4 12 50.69 1.97
 -4 5 12 -0.22 0.45
 -4 5 12 -0.22 0.53
 -4 -5 12 -0.01 0.59
 -4 5 11 29.46 1.37
 -4 5 11 24.78 1.62
 4 5 -11 29.01 1.36
 -4 -5 11 29.77 1.08
 -4 5 10 2.75 0.78
 -4 5 10 3.86 0.58
 4 5 -10 0.34 0.78
 4 -5 -10 1.95 0.81
 -4 5 9 3.74 0.81
 4 5 -9 4.52 0.59
 4 5 -9 4.76 0.73
 4 -5 -9 2.78 1.08
 -4 -5 9 5.63 0.55
 -4 -5 9 6 0.79
 -4 5 8 15.24 0.94
 -4 5 8 20.18 1.07
 4 5 -8 16.24 0.94
 4 5 -8 18.92 0.97
 -4 -5 8 19.71 0.84
 -4 -5 8 16.17 1.07
 -4 5 7 14.82 0.74
 -4 5 7 16.57 0.82
 4 5 -7 13.4 0.84
 4 5 -7 12.35 0.89
 4 -5 -7 14.69 0.72
 4 -5 -7 15.3 1
 -4 -5 7 13.52 0.7
 -4 -5 7 13.8 0.99
 -4 5 6 8.06 0.53
 -4 5 6 7.73 0.58
 4 5 -6 6.45 0.68
 4 5 -6 6.21 0.69
 4 -5 -6 7.55 0.56
 4 -5 -6 7.8 0.58
 -4 -5 6 6.03 0.55
 -4 -5 6 6.22 0.7
 -4 5 5 114.72 3.78
 4 5 -5 105.73 4.04
 4 5 -5 100.91 3.56
 4 -5 -5 120.67 3.76
 4 -5 -5 109.62 3.68
 -4 -5 5 105.23 3.52
 -4 -5 5 101.74 3.86
 -4 5 4 12.77 0.87
 -4 5 4 15.99 0.78
 4 5 -4 18.4 1.05
 4 5 -4 17.26 0.87
 4 -5 -4 14.27 0.72
 4 -5 -4 15.93 0.96
 -4 -5 4 17.77 0.88
 -4 -5 4 20.08 1.09
 -4 5 3 44.16 1.66
 -4 5 3 45.13 1.65
 4 5 -3 46.22 1.97
 4 5 -3 47.2 1.95
 4 -5 -3 43.05 1.59
 4 -5 -3 45.38 1.7
 -4 -5 3 46.13 1.68
 -4 -5 3 45.27 1.79
 -4 5 2 6.28 0.49
 -4 5 2 5.35 0.42
 4 5 -2 7.28 0.61
 4 5 -2 7.1 0.65
 4 -5 -2 6.69 0.63
 -4 -5 2 7.37 0.5
 -4 -5 2 6.65 0.77
 -4 5 1 -0.24 0.32
 -4 5 1 -0.08 0.32
 4 5 -1 -0.12 0.44
 4 5 -1 -0.27 0.46
 4 -5 -1 -0.67 0.34
 4 -5 -1 -0.37 0.49
 -4 -5 1 0.08 0.41
 -4 -5 1 0.37 0.63
 -4 5 0 90.37 2.99
 -4 5 0 87.93 2.99
 4 5 0 94.54 3.14
 4 5 0 92.2 2.98
 4 -5 0 89.97 3.01
 4 -5 0 88.12 2.98
 -4 -5 0 94.32 3.22
 -4 -5 0 87.02 3.06
 -4 5 -1 144.53 4.79
 -4 5 -1 142.08 4.86
 4 5 1 148.79 4.81
 4 5 1 154.16 4.75
 4 -5 1 147.4 4.75
 4 -5 1 146.09 4.71
 -4 -5 -1 143.19 5.03
 -4 -5 -1 149.98 4.82
 -4 5 -2 1.31 0.37
 -4 5 -2 1.29 0.38
 4 5 2 1.03 0.37
 4 5 2 0.85 0.51
 4 -5 2 0.55 0.36
 4 -5 2 0.65 0.48
 -4 -5 -2 1.17 0.4
 -4 -5 -2 0.85 0.64
 -4 5 -3 14.34 0.67
 -4 5 -3 14.67 0.74
 4 5 3 15.1 0.66
 4 5 3 13.41 0.75
 4 -5 3 12.81 0.71
 4 -5 3 13.55 0.79
 -4 -5 -3 14.62 0.68
 -4 -5 -3 13.47 0.87
 -4 5 -4 0.57 0.42
 -4 5 -4 0.27 0.35
 4 5 4 0.8 0.47
 4 5 4 0.13 0.41
 4 -5 4 -0.38 0.38
 4 -5 4 0.75 0.48
 -4 -5 -4 0.83 0.78
 -4 5 -5 0.14 0.32
 -4 5 -5 -0.53 0.35
 4 5 5 -0.02 0.38
 4 -5 5 0.41 0.53
 4 -5 5 -0.09 0.61
 -4 5 -6 59.79 2.09
 -4 5 -6 62.84 2.1
 4 5 6 61.75 2.12
 4 5 6 61.31 2.17
 4 -5 6 63.54 2.09
 4 -5 6 59.87 2.22
 -4 -5 -6 60.31 2.01
 -4 -5 -6 57.31 2.24
 -4 5 -7 6.06 0.51
 -4 5 -7 6.67 0.47
 4 5 7 5.38 0.52
 4 -5 7 5.72 0.56
 4 -5 7 5.33 0.6
 -4 -5 -7 6.28 0.45
 -4 -5 -7 7.39 0.8
 -4 5 -8 27.87 1.11
 -4 5 -8 29.46 1.2
 4 -5 8 25.9 1.28
 -4 5 -9 1.32 0.42
 4 -5 9 0.92 0.51
 4 -5 9 0.97 0.52
 -4 5 -10 25.26 1.74
 4 -5 10 23.23 1.42
 -4 5 -11 24.31 1.45
 -4 5 -11 23.4 1.26
 -4 5 -12 76.22 3.01
 -4 6 12 0.87 0.63
 -4 6 12 1.44 0.56
 4 6 -12 -0.18 1.05
 4 6 -12 1.66 0.93
 4 -6 -12 1.54 0.53
 -4 6 11 106.02 3.87
 -4 6 11 87.82 3.67
 4 6 -11 98.44 3.59
 4 6 -11 96.89 3.25
 4 -6 -11 89.31 3.42
 4 -6 -11 102.68 3.54
 -4 -6 11 98.27 3.29
 -4 -6 11 98.63 3.91
 -4 6 10 -0.58 0.49
 4 6 -10 -0.1 0.82
 4 6 -10 0.83 0.55
 4 -6 -10 0.64 0.5
 -4 -6 10 0.34 0.41
 -4 -6 10 -0.63 0.96
 -4 6 9 93.21 3.28
 4 6 -9 86.94 3.84
 4 6 -9 97.5 3.28
 4 -6 -9 95.91 3.29
 -4 -6 9 96.93 3.14
 -4 -6 9 93.71 3.75
 -4 6 8 9.63 0.71
 -4 6 8 8.28 0.8
 4 6 -8 7.77 0.8
 4 6 -8 9.28 0.91
 -4 -6 8 10.13 0.7
 -4 -6 8 8.37 0.95
 -4 6 7 13.31 0.88
 4 6 -7 11.64 0.96
 4 6 -7 13.83 0.92
 4 -6 -7 13.73 0.74
 4 -6 -7 13.14 0.93
 -4 -6 7 12.79 0.85
 -4 -6 7 13.18 1.14
 -4 6 6 268.42 8.93
 -4 6 6 267.42 8.8
 4 6 -6 273.74 8.77
 4 6 -6 263.97 8.39
 4 -6 -6 261.22 8.72
 4 -6 -6 275.76 8.82
 -4 -6 6 274.07 9.38
 -4 -6 6 277.27 9.11
 -4 6 5 54.72 2.17
 -4 6 5 57.4 2.01
 4 6 -5 58.67 2.03
 4 6 -5 53.77 1.94
 4 -6 -5 54.97 2.02
 4 -6 -5 55.22 2.07
 -4 -6 5 56.39 2.51
 -4 -6 5 58.17 2.12
 -4 6 4 5.82 0.47
 4 6 -4 5.44 0.59
 4 6 -4 5.74 0.65
 4 -6 -4 4.97 0.65
 -4 -6 4 7.39 0.65
 -4 -6 4 6.37 0.82
 -4 6 3 16.32 0.77
 4 6 -3 16.94 0.94
 4 6 -3 16.53 0.94
 4 -6 -3 15.48 0.92
 -4 -6 3 16.95 0.87
 -4 -6 3 18.32 1.01
 -4 6 2 6.06 0.48
 -4 6 2 6.69 0.5
 4 6 -2 5.26 1.29
 4 -6 -2 6.23 0.4
 4 -6 -2 6.02 0.5
 -4 -6 2 5.14 1.6
 -4 6 1 26.47 1.13
 -4 6 1 24.9 1.02
 4 6 -1 28.71 1.3
 4 -6 -1 26.34 1.03
 4 -6 -1 25.81 1.11
 -4 -6 1 26.13 1.37
 -4 -6 1 26.37 1.21
 -4 6 0 82.47 2.66
 -4 6 0 79.85 2.66
 4 6 0 85.21 2.92
 4 -6 0 84.55 2.75
 4 -6 0 81.35 2.96
 -4 -6 0 76.21 3.32
 -4 -6 0 86.41 3.26
 -4 6 -1 2.48 0.39
 -4 6 -1 2.31 0.42
 4 6 1 3.1 0.49
 4 6 1 1.98 0.41
 4 -6 1 2.17 0.41
 4 -6 1 2.01 0.5
 -4 -6 -1 1.98 0.36
 -4 -6 -1 2.58 0.66
 -4 6 -2 14.17 1.11
 -4 6 -2 12.15 0.7
 4 6 2 12.37 0.74
 4 6 2 12.83 0.7
 4 -6 2 13.2 0.75
 4 -6 2 12.63 0.96
 -4 -6 -2 11.16 0.81
 -4 6 -3 1.91 0.39
 -4 6 -3 1.8 0.39
 4 6 3 1.03 0.44
 4 6 3 0.9 0.53
 4 -6 3 1.62 0.39
 4 -6 3 1.87 0.55
 -4 -6 -3 1.48 0.4
 -4 -6 -3 0.58 0.55
 -4 6 -4 12.08 0.89
 -4 6 -4 13.53 1.06
 4 6 4 17.83 1.2
 4 6 4 12.89 0.88
 4 -6 4 12.8 0.91
 4 -6 4 12.13 1.01
 -4 -6 -4 14.13 0.92
 -4 -6 -4 17.72 1.24
 -4 6 -5 34.62 1.49
 -4 6 -5 35.85 1.32
 4 6 5 34.42 1.5
 4 6 5 36.63 1.56
 4 -6 5 37.41 1.46
 4 -6 5 35.99 1.45
 -4 -6 -5 41.05 1.42
 -4 -6 -5 36.51 1.82
 -4 6 -6 10.34 0.66
 -4 6 -6 10.11 0.57
 4 6 6 10.41 0.65
 4 -6 6 10.08 0.65
 4 -6 6 9.26 0.79
 -4 -6 -6 11.57 0.67
 -4 6 -7 239.61 7.53
 -4 6 -7 255.27 7.79
 4 6 7 246.51 7.64
 4 6 7 234.49 7.68
 4 -6 7 236.94 7.59
 4 -6 7 236.63 7.64
 -4 -6 -7 246.34 8.29
 -4 6 -8 7.85 0.56
 -4 6 -8 7.98 0.6
 4 6 8 6.03 0.53
 4 -6 8 8.4 0.77
 -4 -6 -8 9.72 0.7
 4 -6 9 10.84 0.94
 -4 6 -10 0.53 0.43
 4 -6 10 0.57 0.8
 -4 6 -12 100.33 3.49
 4 -6 12 87.18 4.12
 -4 7 12 6.8 0.81
 4 7 -12 4.81 0.72
 4 -7 -12 5.65 0.94
 -4 -7 12 5.86 0.91
 4 7 -11 4.6 0.72
 4 7 -11 4.91 0.64
 -4 -7 11 3.74 0.94
 4 7 -10 35.53 1.38
 4 7 -10 37.28 1.48
 -4 -7 10 37.13 1.35
 -4 -7 10 32.8 1.66
 -4 7 9 14.19 0.79
 -4 7 9 12.99 0.72
 4 7 -9 11.63 0.99
 4 7 -9 14.85 1.2
 4 -7 -9 12.82 0.79
 4 -7 -9 15.22 0.83
 -4 -7 9 14.13 0.91
 -4 -7 9 10.73 1.07
 -4 7 8 45.71 1.88
 -4 7 8 52.05 1.96
 4 7 -8 48.28 1.88
 4 7 -8 53.25 1.88
 4 -7 -8 56.7 1.99
 4 -7 -8 49.08 1.81
 -4 -7 8 48.99 2.11
 -4 -7 8 50.68 2.07
 4 7 -7 -0.47 0.61
 4 7 -7 1.42 0.83
 4 -7 -7 -0.14 0.57
 4 -7 -7 0.09 0.56
 -4 -7 7 0.51 0.83
 -4 -7 7 -0.18 0.82
 -4 7 6 10.69 0.63
 -4 7 6 11.65 0.77
 4 7 -6 9.4 0.74
 4 7 -6 11.49 0.93
 4 -7 -6 12.23 0.95
 4 -7 -6 11.35 0.78
 -4 -7 6 11.79 0.86
 -4 -7 6 10.65 0.91
 -4 7 5 64.08 2.61
 -4 7 5 73.54 2.57
 4 7 -5 68.1 2.37
 4 7 -5 73.16 2.7
 4 -7 -5 63.43 3.02
 4 -7 -5 67.48 2.55
 -4 -7 5 76.39 2.57
 -4 -7 5 70.73 2.86
 -4 7 4 1.45 0.43
 -4 7 4 1.87 0.44
 4 7 -4 2.17 0.77
 4 7 -4 2.14 0.69
 4 -7 -4 1.52 0.41
 4 -7 -4 2.16 0.57
 -4 -7 4 2.33 0.82
 -4 -7 4 1.45 0.97
 -4 7 3 104.93 3.4
 -4 7 3 104.45 3.51
 4 -7 -3 99.29 3.65
 4 -7 -3 102.02 3.34
 -4 7 2 -0.46 0.4
 -4 7 2 -0.36 0.25
 4 7 -2 -0.63 0.5
 4 7 -2 -0.38 0.56
 4 -7 -2 -0.15 0.39
 4 -7 -2 0.02 0.5
 -4 -7 2 -0.68 0.5
 -4 -7 2 -0.63 0.7
 -4 7 1 125.31 4.03
 -4 7 1 122.48 4.1
 4 7 -1 126.17 4.38
 4 7 -1 127.54 4.29
 4 -7 -1 123.95 4.1
 4 -7 -1 125.57 4.06
 -4 -7 1 131.52 4.21
 -4 -7 1 127.27 4.25
 -4 7 0 59.15 2.27
 -4 7 0 64.04 2.23
 4 7 0 61.13 2.6
 4 7 0 66.11 2.45
 4 -7 0 58.88 2.35
 4 -7 0 62.29 2.25
 -4 -7 0 64.22 2.22
 -4 -7 0 66.75 2.37
 -4 7 -1 161.39 5.2
 -4 7 -1 161.34 5.22
 4 7 1 176.69 5.34
 4 7 1 169.78 5.37
 4 -7 1 160.25 5.22
 4 -7 1 166.64 5.59
 -4 -7 -1 166.3 5.33
 -4 -7 -1 166.46 5.39
 -4 7 -2 117.14 3.74
 -4 7 -2 118.9 3.74
 4 7 2 121.54 3.92
 4 7 2 116.25 3.97
 4 -7 2 114.83 3.91
 4 -7 2 113.94 4.05
 -4 -7 -2 119.98 3.81
 -4 -7 -2 118.95 4.09
 -4 7 -3 0.49 0.42
 -4 7 -3 0.23 0.39
 4 7 3 0.01 0.48
 4 7 3 0.08 0.44
 4 -7 3 0.18 0.44
 4 -7 3 0.32 0.55
 -4 -7 -3 0.67 0.4
 -4 -7 -3 0.27 0.51
 -4 7 -4 65.49 2.21
 -4 7 -4 63.41 2.19
 4 7 4 61.96 2.22
 4 7 4 62.1 2.19
 4 -7 4 67.61 2.18
 4 -7 4 63.08 2.23
 -4 -7 -4 65.43 2.15
 -4 -7 -4 64.13 2.42
 -4 7 -5 9.03 0.77
 -4 7 -5 9.86 0.65
 4 7 5 10.94 0.72
 4 7 5 8.94 0.68
 4 -7 5 9.66 0.79
 4 -7 5 9.07 1.01
 -4 -7 -5 9.63 1.14
 -4 7 -6 25.35 1.06
 -4 7 -6 24.13 1.11
 4 -7 6 24.91 1.12
 4 -7 6 20.99 1.27
 -4 -7 -6 29.22 1.13
 -4 7 -7 8.09 0.62
 -4 7 -7 9.92 0.69
 4 7 7 7.93 0.66
 4 7 7 6.71 0.62
 4 -7 7 9.66 0.71
 4 -7 7 7.22 0.7
 -4 -7 -7 9.26 0.71
 -4 -7 -7 5.36 0.63
 -4 7 -8 5.46 0.59
 -4 7 -8 7.5 0.77
 4 -7 8 6.19 0.69
 4 -7 8 4.86 0.64
 -4 7 -9 4.81 0.72
 4 8 -11 2.97 0.74
 4 -8 -11 2.09 0.63
 -4 8 10 8.84 0.69
 -4 8 10 12.07 0.71
 4 -8 -10 13.75 0.86
 4 -8 -10 10.49 0.91
 -4 8 9 41.02 1.37
 -4 8 9 38.22 1.79
 4 8 -9 30.49 1.79
 4 8 -9 36.68 1.76
 4 -8 -9 40.7 1.65
 -4 -8 9 35.07 1.91
 -4 8 8 1 0.6
 -4 8 8 6.45 1.38
 4 8 -8 1.16 0.63
 4 8 -8 1.9 0.74
 4 -8 -8 5.27 1.62
 4 -8 -8 1.08 0.41
 -4 -8 8 1.74 0.41
 -4 -8 8 2.03 0.74
 -4 8 7 1.59 0.44
 -4 8 7 2.09 0.46
 4 8 -7 2.43 0.64
 4 8 -7 3.28 0.75
 -4 -8 7 2.7 0.56
 -4 -8 7 2.69 0.78
 -4 8 6 34.87 1.49
 -4 8 6 40.71 1.51
 4 8 -6 40.93 1.52
 4 8 -6 37.34 1.95
 4 -8 -6 36.29 1.55
 4 -8 -6 35.86 1.51
 -4 -8 6 40.05 1.47
 -4 -8 6 40.28 1.7
 -4 8 5 0.2 0.47
 4 8 -5 0.29 0.62
 4 8 -5 1.36 0.62
 4 -8 -5 0.56 0.44
 4 -8 -5 -0.05 0.57
 -4 -8 5 1.58 0.43
 -4 -8 5 0.92 0.8
 -4 8 4 8.8 0.7
 4 8 -4 7.08 0.78
 4 8 -4 8.28 0.73
 4 -8 -4 5.98 0.59
 4 -8 -4 7.68 0.74
 -4 -8 4 8.26 0.64
 -4 -8 4 8.46 0.89
 -4 8 3 18.23 0.85
 -4 8 3 18.82 1.08
 4 8 -3 18.67 0.87
 4 8 -3 18.74 0.92
 4 -8 -3 17.84 1.05
 4 -8 -3 18.62 1
 -4 -8 3 18.71 0.96
 -4 -8 3 19.27 1.16
 -4 8 2 114.07 3.86
 -4 8 2 117.94 3.79
 4 8 -2 114.25 3.84
 4 8 -2 114.27 3.89
 4 -8 -2 114.37 3.84
 4 -8 -2 118.44 3.96
 -4 -8 2 114.55 3.78
 -4 -8 2 118.67 4.1
 -4 8 1 6.07 0.49
 -4 8 1 6.09 0.48
 4 8 -1 5.98 0.62
 4 8 -1 6.15 0.61
 4 -8 -1 5.21 0.49
 4 -8 -1 5.67 0.66
 -4 -8 1 6.21 0.58
 -4 -8 1 6.3 0.84
 -4 8 0 1.44 0.42
 -4 8 0 0.86 0.4
 4 8 0 1.04 0.65
 4 8 0 1.9 0.64
 4 -8 0 1.43 0.48
 4 -8 0 2.07 0.57
 -4 -8 0 2.2 0.59
 -4 -8 0 2.01 1.01
 -4 8 -1 3.96 0.48
 -4 8 -1 3.67 0.48
 4 8 1 4.63 0.72
 4 8 1 3.52 0.53
 4 -8 1 4.61 0.55
 4 -8 1 3.84 0.71
 -4 -8 -1 3.31 0.51
 -4 -8 -1 1.68 1.12
 -4 8 -2 20.04 0.88
 -4 8 -2 20.74 0.99
 4 8 2 19.7 0.94
 4 8 2 19.44 0.93
 4 -8 2 17.52 0.97
 4 -8 2 19.08 0.99
 -4 -8 -2 18.95 0.96
 -4 -8 -2 21.36 1.13
 -4 8 -3 82.09 2.63
 -4 8 -3 78.77 2.6
 4 8 3 79.9 2.79
 4 8 3 80.88 2.67
 4 -8 3 82.03 2.7
 4 -8 3 80.15 2.67
 -4 -8 -3 79.92 2.62
 -4 -8 -3 78.74 2.97
 -4 8 -4 7.91 0.63
 -4 8 -4 7.08 0.55
 4 8 4 7.29 0.53
 4 8 4 7.81 0.67
 4 -8 4 7.93 0.6
 4 -8 4 7.94 0.73
 -4 8 -5 12.56 0.75
 -4 8 -5 11.09 0.63
 4 8 5 11.81 0.95
 4 -8 5 11.38 0.69
 4 -8 5 11.02 0.92
 -4 -8 -5 9.9 0.93
 -4 -8 -5 11.91 1.27
 -4 8 -6 82.21 2.86
 -4 8 -6 78.22 2.8
 4 8 6 84.89 2.75
 4 8 6 87.5 3.11
 4 -8 6 78.38 2.77
 4 -8 6 80.39 2.78
 -4 -8 -6 77.48 2.81
 -4 -8 -6 83.45 3.54
 -4 8 -7 14.31 0.92
 -4 8 -7 14.95 0.96
 4 -8 7 13.41 1.04
 4 -8 7 13.23 1
 -4 8 -8 -0.44 0.8
 -4 8 -8 -0.48 0.67
 4 8 8 0.26 0.63
 4 -8 8 -0.69 0.64
 4 -8 8 -0.58 0.67
 -4 8 -9 38.83 1.61
 4 -8 9 28.11 1.92
 -4 8 -10 3.82 0.8
 -4 8 -10 4.79 0.91
 -4 8 -11 27.04 1.61
 -4 9 10 0.8 0.55
 4 -9 -10 0.87 0.69
 4 9 -9 8.95 0.73
 4 9 -8 0.43 0.64
 4 9 -8 0.44 0.62
 -4 -9 8 0.44 0.5
 -4 -9 8 0.38 0.79
 -4 9 7 5.07 0.53
 4 9 -7 6.46 0.79
 4 9 -7 6.31 0.75
 4 -9 -7 5.4 0.62
 -4 -9 7 6.41 0.6
 -4 -9 7 7.24 0.97
 -4 9 6 21.99 1.13
 4 9 -6 23.74 1.08
 4 9 -6 23.82 0.99
 4 -9 -6 21.25 1.29
 4 -9 -6 21.65 1.11
 -4 -9 6 23.19 1
 -4 -9 6 24.02 1.28
 -4 9 5 224.66 7.88
 -4 9 5 218.17 7.23
 4 9 -5 225.64 7.69
 4 9 -5 228 7.02
 4 -9 -5 220.4 7.31
 4 -9 -5 224.23 7.28
 -4 -9 5 221.53 6.93
 -4 -9 5 227 7.21
 -4 9 4 70.61 2.61
 -4 9 4 74.9 2.54
 4 9 -4 81.55 2.58
 4 9 -4 77.87 2.59
 4 -9 -4 75.83 2.48
 4 -9 -4 73.83 2.65
 -4 -9 4 75.29 2.46
 -4 -9 4 79.29 2.79
 -4 9 3 -0.09 0.41
 4 9 -3 0.59 0.64
 4 9 -3 0.31 0.6
 4 -9 -3 0.36 0.4
 -4 -9 3 -0.06 0.49
 -4 -9 3 0.49 0.87
 -4 9 2 6 0.51
 -4 9 2 5.51 0.52
 4 9 -2 6.54 0.69
 4 -9 -2 3.97 0.51
 4 -9 -2 4.97 0.64
 -4 -9 2 5.41 0.45
 -4 -9 2 6.17 0.91
 -4 9 1 16.62 0.8
 -4 9 1 18.14 0.88
 4 9 -1 15.22 1.01
 4 -9 -1 19.69 0.94
 4 -9 -1 18.16 0.92
 -4 -9 1 18.01 0.87
 -4 -9 1 14.45 1.06
 -4 9 0 34.7 1.5
 -4 9 0 38.97 1.37
 4 9 0 35.99 1.53
 4 9 0 36.7 1.56
 4 -9 0 36.01 1.73
 4 -9 0 36.61 1.61
 -4 -9 0 39.35 1.34
 -4 -9 0 31.04 1.85
 -4 9 -1 32.76 1.21
 -4 9 -1 34.29 1.42
 4 9 1 31.82 1.37
 4 9 1 33.45 1.33
 4 -9 1 34.36 1.22
 4 -9 1 32.56 1.38
 -4 -9 -1 31.77 1.57
 -4 -9 -1 26.63 1.71
 -4 9 -2 3.56 0.57
 -4 9 -2 2.69 0.35
 4 9 2 2.9 0.66
 4 9 2 2.8 0.58
 4 -9 2 2.51 0.48
 4 -9 2 3.81 0.65
 -4 -9 -2 2.62 0.58
 -4 -9 -2 2.29 0.78
 -4 9 -3 72.96 2.46
 -4 9 -3 74.46 2.39
 4 9 3 68.04 2.72
 4 9 3 68.71 2.5
 4 -9 3 72.13 2.36
 4 -9 3 76.17 2.56
 -4 -9 -3 74.35 2.41
 -4 -9 -3 73.63 2.75
 -4 9 -4 0.45 0.69
 -4 9 -4 -0.01 0.48
 4 9 4 -0.47 0.62
 4 -9 4 0.45 0.36
 4 -9 4 0.67 0.69
 -4 -9 -4 0.59 0.64
 -4 9 -5 0.24 0.55
 -4 9 -5 -0.2 0.43
 4 9 5 -0.16 0.68
 4 -9 5 0.23 0.49
 4 -9 5 -0.22 0.69
 -4 -9 -5 0.19 0.48
 -4 9 -6 174.83 6.08
 -4 9 -6 184.61 5.84
 4 9 6 191.07 6.37
 4 -9 6 188.72 6.26
 4 -9 6 176.65 5.96
 -4 -9 -6 198.24 6.35
 -4 -9 -6 178.37 6.12
 -4 9 -7 19.11 1.06
 -4 9 -7 19.05 1.09
 4 -9 7 16.44 1.21
 4 -9 7 17.81 1.23
 -4 9 -8 5.17 0.75
 -4 9 -8 5.46 0.75
 4 -9 8 4.77 0.85
 -4 9 -9 7.72 0.82
 4 -9 9 7.75 0.78
 4 -9 9 7.11 0.95
 -4 10 8 0.8 0.45
 -4 10 8 1.1 0.47
 4 -10 -8 0.67 0.47
 -4 10 7 0.09 0.53
 -4 10 7 -0.19 0.53
 4 -10 -7 0.32 0.44
 4 -10 -6 24.46 1.35
 -4 -10 6 24.74 1.11
 -4 10 5 10.26 0.62
 4 -10 -5 11.69 0.77
 -4 -10 5 8.84 0.72
 -4 10 4 15.12 0.75
 4 -10 -4 15.47 0.79
 -4 -10 4 16.77 0.96
 -4 10 3 31.06 1.59
 4 -10 -3 33.81 1.54
 -4 -10 3 34.34 1.25
 -4 10 2 166.78 5.63
 -4 10 2 172.39 5.6
 4 10 -2 177 5.77
 4 10 -2 181.76 6.13
 4 -10 -2 185.04 6.23
 4 -10 -2 172.67 5.73
 -4 -10 2 178.65 5.56
 -4 -10 2 179.86 5.81
 -4 10 1 42.22 1.48
 -4 10 1 44.13 1.54
 4 10 -1 43.39 1.72
 4 10 -1 43.35 1.89
 4 -10 -1 41.15 1.47
 4 -10 -1 42.13 1.72
 -4 -10 1 43.94 1.47
 -4 -10 1 43.83 1.8
 -4 10 0 53.97 1.91
 -4 10 0 56.85 1.89
 4 10 0 52.51 1.97
 4 10 0 54.57 1.95
 4 -10 0 55.27 1.85
 4 -10 0 54.91 1.89
 -4 -10 0 54.91 1.92
 -4 -10 0 58.66 2.13
 -4 10 -1 1.99 0.59
 -4 10 -1 1.55 0.44
 4 10 1 1.61 0.5
 4 10 1 2.26 0.61
 4 -10 1 2.31 0.48
 4 -10 1 1.43 0.68
 -4 -10 -1 2.26 0.62
 -4 -10 -1 0.86 0.74
 -4 10 -2 33.98 1.36
 -4 10 -2 34.27 1.3
 4 10 2 34.37 1.65
 4 10 2 30.84 1.58
 4 -10 2 32.79 1.23
 4 -10 2 33.22 1.6
 -4 -10 -2 36.79 1.56
 -4 10 -3 70.11 2.57
 -4 10 -3 68.83 2.45
 4 10 3 71.95 2.79
 4 10 3 69.87 2.58
 4 -10 3 71.84 2.56
 4 -10 3 70.49 2.77
 -4 -10 -3 76.51 2.81
 -4 10 -4 11.84 0.82
 -4 10 -4 13.37 0.74
 4 10 4 12.41 0.9
 4 10 4 10.79 0.83
 4 -10 4 12.43 0.81
 4 -10 4 14.4 1.04
 -4 -10 -4 11.76 0.97
 -4 -10 -4 9.24 1.22
 -4 10 -5 19.55 1.23
 -4 10 -5 21.72 1.07
 4 -10 5 22.97 1.21
 4 -10 5 22.2 1.21
 -4 -10 -5 24.28 1.38
 -4 10 -6 53.5 2.01
 -4 10 -6 58.46 2.1
 4 10 6 51.41 2.46
 4 10 6 57.04 2.29
 4 -10 6 56.32 2.11
 4 -10 6 55.95 2
 -4 10 -7 144.39 4.73
 -4 10 -7 137.47 4.62
 4 10 7 147.96 4.68
 4 10 7 145.56 4.77
 4 -10 7 148.23 4.69
 -4 -10 -7 146.32 4.83
 -4 -10 -7 126.53 5.2
 -4 10 -8 -0.25 0.89
 -4 10 -8 0.05 0.7
 -4 10 -9 13.61 1.05
 -4 11 7 3.21 0.64
 4 -11 -7 2.68 0.5
 -4 11 6 0.71 0.51
 -4 11 5 10.58 0.74
 4 -11 -5 14.36 0.74
 4 -11 -5 11.92 0.89
 -4 -11 5 14.16 0.75
 -4 11 4 19.16 1.3
 -4 11 4 21.6 1.13
 4 -11 -4 27.3 1.21
 4 -11 -4 24.72 1.29
 -4 -11 4 26.41 1.28
 -4 11 3 1.48 0.48
 -4 11 3 2.31 0.48
 4 11 -3 2.36 0.92
 4 11 -3 1.46 0.69
 4 -11 -3 1.71 0.5
 4 -11 -3 1.79 0.6
 -4 -11 3 1.95 0.47
 -4 -11 3 2.38 1.37
 -4 11 2 28.12 1.17
 -4 11 2 29.74 1.16
 4 11 -2 32.45 1.77
 4 11 -2 31.21 1.37
 4 -11 -2 26.73 1.23
 4 -11 -2 29.09 1.35
 -4 -11 2 30.57 1.4
 -4 -11 2 32.78 2.08
 -4 11 1 1.43 0.52
 -4 11 1 0.84 0.37
 4 11 -1 0.77 0.8
 4 -11 -1 0.26 0.51
 4 -11 -1 0.94 0.63
 -4 -11 1 0.58 0.73
 -4 -11 1 0.74 1.46
 -4 11 0 77.76 2.63
 -4 11 0 79.52 2.73
 4 11 0 83.79 2.9
 4 11 0 75.65 3.07
 4 -11 0 80.15 2.77
 4 -11 0 81.24 2.77
 -4 -11 0 84.23 3.01
 -4 -11 0 81.84 2.96
 -4 11 -1 165.72 5.18
 -4 11 -1 166.96 5.16
 4 11 1 157.58 5.45
 4 11 1 162.02 5.38
 4 -11 1 160.36 5.14
 4 -11 1 170.46 5.31
 -4 -11 -1 168.89 5.51
 -4 -11 -1 163.36 5.79
 -4 11 -2 7.11 0.85
 -4 11 -2 7.01 0.74
 4 11 2 6.42 0.86
 4 11 2 3.99 0.74
 4 -11 2 8.33 0.72
 4 -11 2 6.48 0.88
 -4 -11 -2 4.49 0.56
 -4 11 -3 47.08 1.83
 -4 11 -3 47.77 1.83
 4 11 3 42.86 2.03
 4 11 3 42.97 1.71
 4 -11 3 49.53 2.02
 4 -11 3 48.46 1.89
 -4 -11 -3 49.68 1.94
 -4 11 -4 4.03 0.79
 -4 11 -4 3.92 0.68
 4 11 4 3.68 0.8
 4 -11 4 3.02 0.68
 4 -11 4 4 0.87
 -4 -11 -4 4.68 0.89
 -4 11 -5 18.64 1.17
 -4 11 -5 15.63 1.11
 4 11 5 14.44 1.31
 4 -11 5 18.18 0.91
 4 -11 5 16.31 1.24
 -4 11 -6 25.59 1.25
 -4 11 -6 25.47 1.44
 4 -11 6 25.47 1.2
 4 -11 6 21.81 1.48
 -4 -11 -6 26.81 1.65
 -4 11 -7 3.76 0.88
 -4 11 -7 4.43 0.72
 4 11 7 2.2 0.93
 4 -11 7 4.37 0.95
 -4 -11 -7 2.96 1.39
 -4 11 -8 12.76 1.07
 4 -11 8 13.69 0.94
 -4 12 4 7.69 0.65
 4 -12 -4 8.52 0.75
 -4 12 3 3.41 0.57
 -4 12 3 3.91 0.55
 4 12 -3 3.72 0.83
 4 -12 -3 3.87 0.53
 4 -12 -3 4.33 0.65
 -4 -12 3 4 0.74
 -4 12 2 0.6 0.59
 -4 12 2 -0.71 0.5
 4 12 -2 0.43 0.79
 4 -12 -2 -0.15 0.49
 4 -12 -2 0.34 0.61
 -4 -12 2 0.43 0.7
 -4 12 1 23.95 1.22
 -4 12 1 26.51 1.09
 4 12 -1 22.78 1.4
 4 12 -1 24.69 1.48
 4 -12 -1 23.18 1.08
 4 -12 -1 24.31 1.35
 -4 -12 1 25.83 1.34
 -4 -12 1 28.35 1.91
 -4 12 0 15.88 0.99
 -4 12 0 16.52 0.88
 4 12 0 15.57 0.92
 4 12 0 18.16 1.22
 4 -12 0 15.77 0.8
 4 -12 0 16.11 0.85
 -4 -12 0 13.6 1.05
 -4 -12 0 17.49 1.77
 -4 12 -1 0.46 0.79
 -4 12 -1 1.15 0.65
 4 12 1 0.5 0.62
 4 12 1 1.34 0.66
 4 -12 1 0.57 0.44
 4 -12 1 0.3 0.81
 -4 -12 -1 0.84 0.88
 -4 -12 -1 -0.83 1.33
 -4 12 -2 18.27 1.37
 -4 12 -2 19.56 0.95
 4 12 2 20.82 1.56
 4 12 2 17.92 1.17
 4 -12 2 20.71 1.18
 4 -12 2 19.29 1.27
 -4 -12 -2 17.95 1.56
 -4 -12 -2 15.88 1.45
 -4 12 -3 0.93 0.85
 4 -12 3 0.77 0.85
 -4 12 -4 0.49 0.8
 -4 12 -4 0.94 0.56
 4 12 4 0.75 1
 4 12 4 0.96 0.69
 4 -12 4 0.45 0.61
 4 -12 4 1.55 0.9
 -4 12 -5 5.07 0.9
 -4 12 -5 5.09 0.78
 4 12 5 4.63 1.28
 4 -12 5 4.92 0.65
 4 -12 5 6.3 0.92
 -4 -12 -5 6.9 1.3
 -4 12 -6 0.04 0.64
 4 -12 6 0.5 0.67
 4 -12 6 -0.02 0.85
 -4 -13 4 8.27 1.06
 -4 -13 3 31.85 1.65
 -4 13 2 2.5 0.62
 4 -13 -2 2.57 0.69
 -4 -13 2 3.62 0.87
 -4 13 1 1.25 0.62
 -4 13 1 1.31 0.65
 4 -13 -1 1.59 0.59
 4 -13 -1 1.21 0.69
 -4 -13 1 1.93 0.95
 -4 13 0 182.33 5.98
 -4 13 0 190.34 6.41
 4 13 0 175.38 5.74
 4 13 0 168.81 6.21
 4 -13 0 179.04 6.3
 4 -13 0 180.94 5.99
 -4 -13 0 183.23 5.82
 -4 13 -1 156.08 6.04
 -4 13 -1 164.35 5.73
 4 13 1 167.57 5.31
 4 13 1 159.23 5.99
 4 -13 1 165.71 6.06
 4 -13 1 166.41 5.55
 -4 -13 -1 169.64 5.45
 -4 -13 -1 170.28 5.89
 -4 13 -2 8.52 0.95
 4 13 2 6.56 0.84
 4 -13 2 5.71 0.94
 -4 -13 -2 6.9 1.52
 -4 13 -3 17.07 1.22
 4 -13 3 12.68 1.27
 -4 13 -4 55.06 2.42
 -4 13 -4 58.81 2.29
 4 -13 4 54.52 2.37
 -4 -13 -4 57.51 2.65
 -5 0 7 1.68 0.51
 -5 0 7 1.42 0.63
 5 0 -7 0.84 0.57
 5 0 -7 2.1 0.91
 -5 0 6 12.44 0.74
 -5 0 6 10.39 0.82
 5 0 -6 11.59 0.78
 5 0 -6 11.77 0.99
 -5 0 5 58.84 2.14
 -5 0 5 59.96 2.27
 5 0 -5 56.55 2.14
 5 0 -5 56.86 2.42
 -5 0 4 37.63 1.43
 -5 0 4 37.82 1.61
 5 0 -4 36.71 1.64
 5 0 -4 38.83 1.73
 -5 0 3 5.07 0.64
 5 0 -3 3.6 0.77
 -5 0 2 7.91 0.7
 5 0 -2 6.84 0.61
 5 0 -2 6.43 0.6
 -5 0 1 39.66 1.46
 -5 0 1 39.89 1.7
 5 0 -1 37.52 1.48
 5 0 -1 35.08 1.79
 -5 0 0 36.82 1.44
 5 0 0 37.81 1.61
 5 0 0 34.4 1.69
 -5 0 -1 158.49 4.92
 -5 0 -1 149.94 5.2
 5 0 1 157.47 5.41
 5 0 1 151.16 5.11
 -5 0 -2 3.89 0.82
 5 0 2 4.08 0.93
 -5 0 -3 11.76 0.92
 5 0 3 12.45 0.75
 5 0 3 9.84 1.17
 -5 0 -4 48.43 1.71
 -5 0 -4 46.03 2.08
 5 0 4 44.7 1.8
 5 0 4 39.82 2.37
 -5 0 -5 418.96 12.93
 -5 0 -5 418.91 14.27
 5 0 5 405.71 13.84
 5 0 5 426.53 13.24
 -5 0 -6 54.62 2.18
 -5 0 -6 52.02 2.04
 5 0 6 50.86 2.1
 5 0 6 54.53 2.4
 -5 1 7 136.13 4.29
 -5 1 7 134.69 4.57
 5 1 -7 132.44 4.52
 5 1 -7 120.72 4.93
 5 -1 -7 130.74 4.46
 5 -1 -7 136.29 4.61
 -5 -1 7 142.98 5.49
 -5 -1 7 141.65 4.61
 -5 1 6 10.29 0.77
 -5 1 6 9.57 0.94
 5 1 -6 11.11 0.94
 5 1 -6 7.9 1.17
 5 -1 -6 9.42 0.86
 5 -1 -6 10.63 0.89
 -5 -1 6 12.08 1.2
 -5 -1 6 8.49 1.07
 -5 1 5 2.27 0.78
 5 1 -5 2.19 0.72
 5 1 -5 1.6 0.9
 5 -1 -5 4.56 0.75
 5 -1 -5 3.86 0.74
 -5 -1 5 3.34 0.85
 -5 -1 5 3.46 0.81
 -5 1 4 3.39 0.38
 5 1 -4 2.7 0.62
 5 1 -4 3.57 0.84
 5 -1 -4 3.39 0.66
 5 -1 -4 3.85 0.86
 -5 -1 4 3.62 0.44
 -5 -1 4 2.31 0.67
 -5 1 3 0.29 0.51
 -5 1 3 -0.2 0.46
 5 1 -3 0.07 0.57
 5 1 -3 -0.1 0.72
 5 -1 -3 0.07 0.65
 5 -1 -3 -0.02 0.8
 -5 -1 3 -0.04 0.53
 -5 -1 3 -0.15 0.61
 -5 1 2 19.06 1.03
 -5 1 2 19.78 1.34
 5 1 -2 22.81 1.17
 5 -1 -2 22.68 1.16
 5 -1 -2 22.3 1.22
 -5 -1 2 22.2 0.95
 5 1 -1 5.81 0.94
 -5 -1 1 8.44 0.87
 -5 1 0 69.58 3.1
 5 1 0 74.64 2.59
 5 1 0 84.17 2.86
 5 -1 0 80.73 2.66
 5 -1 0 79.69 2.83
 -5 -1 0 74.89 2.76
 -5 -1 0 81.08 2.89
 5 1 1 0.3 0.5
 5 1 1 1.61 0.7
 5 -1 1 1.1 0.47
 -5 -1 -1 0.95 0.49
 5 1 2 6.28 0.65
 5 1 2 7.74 0.9
 5 -1 2 6.8 0.59
 -5 -1 -2 6.39 0.64
 5 1 3 12.23 1.18
 5 -1 3 14.77 0.83
 5 -1 3 13.82 0.87
 -5 -1 -3 12.53 0.96
 -5 1 -4 2.69 1.05
 5 1 4 4.29 1.08
 5 -1 4 2.88 0.61
 5 -1 4 2.35 0.86
 -5 -1 -4 3.04 0.77
 -5 1 -5 66.94 2.52
 -5 1 -5 77.87 2.9
 5 1 5 73.19 2.76
 5 1 5 76.58 2.8
 5 -1 5 69 3.38
 5 -1 5 72.4 2.62
 -5 -1 -5 69.55 2.91
 -5 -1 -5 78.5 2.69
 -5 1 -6 109.83 3.75
 5 1 6 99.89 4.02
 5 1 6 111.48 3.83
 5 -1 6 119.33 3.75
 5 -1 6 115.04 3.69
 -5 -1 -6 95.65 4.17
 -5 -2 7 9.77 0.87
 5 2 -6 27.43 1.66
 -5 -2 6 27.36 1.5
 5 2 -5 -0.23 0.69
 -5 -2 5 0.44 0.84
 5 2 -4 17.6 1.04
 5 2 -4 11.24 1.4
 -5 -2 4 14.81 1.44
 -5 -2 4 17.56 1.12
 -5 2 3 3 0.55
 -5 2 3 2.68 0.62
 5 -2 -3 3.43 0.62
 5 -2 -3 2.69 0.85
 -5 -2 3 3.6 0.74
 -5 2 2 19.18 1.06
 -5 2 2 20.82 1.3
 5 2 -2 23.79 1.07
 5 -2 -2 20.31 1.29
 5 -2 -2 25.73 1.29
 -5 -2 2 19.7 1.33
 -5 2 1 0.77 0.71
 5 -2 -1 0.82 0.67
 -5 2 0 2.42 0.53
 5 -2 0 2.58 0.57
 -5 2 -1 33.25 1.52
 5 2 1 37.38 1.5
 5 -2 1 38.19 1.33
 -5 -2 -1 34.16 1.72
 -5 2 -2 0.83 0.49
 5 2 2 0.72 0.62
 5 2 2 0.41 0.81
 5 -2 2 0.69 0.5
 -5 -2 -2 0.72 0.55
 -5 2 -3 1.27 0.51
 -5 2 -3 2.16 0.82
 5 2 3 0.62 0.69
 5 2 3 1.89 0.8
 5 -2 3 1.18 0.53
 -5 -2 -3 1.32 0.62
 -5 -2 -3 1 0.63
 -5 2 -4 0.87 0.78
 5 2 4 1.12 0.75
 5 -2 4 1.04 0.83
 -5 2 -5 25.81 1.25
 5 -2 5 22.22 1.16
 5 2 6 0.71 0.72
 5 -2 6 0.51 0.78
 -5 -2 -6 1.29 1.06
 -5 3 6 9.85 0.79
 5 3 -6 9.63 1
 5 3 -6 12.28 1.05
 5 -3 -6 11.36 0.74
 5 -3 -6 11.03 1.03
 -5 -3 6 10.51 0.94
 -5 -3 6 7.09 1
 -5 3 5 82.31 3.38
 -5 3 5 100.11 3.37
 5 3 -5 90.78 3.66
 5 3 -5 104.2 3.46
 5 -3 -5 100.17 3.35
 5 -3 -5 99.75 3.51
 -5 -3 5 98.22 3.88
 -5 3 4 15.31 1
 -5 3 4 18.02 0.9
 5 3 -4 16 1.04
 5 3 -4 17.21 1.13
 5 -3 -4 17.04 0.92
 5 -3 -4 18.47 1.21
 -5 -3 4 13.18 1.06
 -5 -3 4 18.4 1.26
 -5 3 3 5.98 0.7
 -5 3 3 7.21 0.82
 5 3 -3 6.31 0.93
 5 -3 -3 7.84 0.77
 5 -3 -3 10.39 1.08
 -5 -3 3 6.8 0.53
 -5 -3 3 5.11 0.99
 -5 3 2 12.14 0.79
 -5 3 2 12.95 0.95
 5 3 -2 12.29 1.03
 5 -3 -2 11.48 0.79
 5 -3 -2 14.67 1.07
 -5 -3 2 12.25 0.78
 -5 -3 2 11.79 1.2
 -5 3 1 43.9 1.55
 -5 3 1 40.51 1.69
 5 3 -1 44.33 1.86
 5 -3 -1 44.85 1.52
 5 -3 -1 45.28 1.83
 -5 -3 1 42.25 1.73
 -5 3 0 12.15 0.79
 -5 3 0 10.53 0.74
 5 -3 0 12.23 0.75
 -5 -3 0 12.45 0.66
 -5 3 -1 -0.27 0.51
 -5 -3 -1 1.38 0.64
 -5 3 -2 3.99 0.6
 5 3 2 2.21 0.58
 5 -3 2 4.07 0.59
 -5 -3 -2 2.66 0.77
 -5 -3 -2 2.22 0.71
 -5 3 -3 13.82 0.95
 -5 3 -3 16.3 1.4
 5 -3 3 13.51 0.94
 -5 3 -4 2.48 0.61
 -5 3 -4 3.37 0.82
 5 -3 4 2.68 0.68
 -5 3 -5 3.61 0.64
 5 -3 5 2.47 0.65
 -5 3 -6 293.12 8.96
 5 3 6 288.89 9.42
 5 3 6 299.34 9.88
 5 -3 6 275.27 9.08
 -5 -3 -6 280.78 9.18
 -5 4 6 9.73 0.72
 -5 4 6 9.03 0.87
 5 4 -6 6.36 0.95
 5 4 -6 8.77 0.94
 5 -4 -6 9.81 0.78
 5 -4 -6 11.15 1.03
 -5 -4 6 9.02 0.91
 -5 -4 6 8.23 1.03
 -5 4 5 33.34 1.39
 -5 4 5 32.18 1.58
 5 4 -5 36.63 1.5
 5 4 -5 31.95 1.79
 5 -4 -5 35.23 1.42
 5 -4 -5 36.65 1.66
 -5 -4 5 36.23 1.32
 -5 -4 5 34.51 1.45
 -5 4 4 72.98 2.39
 -5 4 4 72.28 2.63
 5 4 -4 76.52 2.72
 5 4 -4 72.18 2.59
 5 -4 -4 75.55 2.67
 5 -4 -4 74.16 2.8
 -5 -4 4 70.57 2.54
 -5 -4 4 71.93 2.73
 -5 4 3 4.17 0.56
 -5 4 3 2.65 0.56
 5 4 -3 2.42 0.85
 5 4 -3 3.26 0.95
 5 -4 -3 4.21 0.61
 5 -4 -3 3.62 0.6
 -5 -4 3 2.86 0.78
 -5 -4 3 4.62 1.1
 -5 4 2 67.9 2.21
 -5 4 2 65.67 2.43
 5 4 -2 69.12 2.58
 5 4 -2 66.96 2.45
 5 -4 -2 68.31 2.23
 5 -4 -2 73.2 2.69
 -5 -4 2 65.95 2.68
 -5 -4 2 65.93 3.11
 -5 4 1 54.43 1.75
 -5 4 1 49.34 1.93
 5 4 -1 45.56 2.47
 5 4 -1 50.71 2
 5 -4 -1 50.72 1.76
 5 -4 -1 49.12 2.37
 -5 -4 1 52.27 2.02
 -5 -4 1 53.79 2.51
 -5 4 0 4.47 0.73
 5 4 0 6.41 0.74
 5 4 0 5.08 0.87
 -5 -4 0 5.25 0.72
 -5 4 -1 0.07 0.67
 5 4 1 0.8 0.52
 5 4 1 1.28 0.95
 -5 -4 -1 0.28 0.52
 -5 4 -2 9.61 1.07
 -5 4 -2 11.24 0.9
 5 4 2 10.49 1.21
 5 -4 2 12.67 0.99
 -5 -4 -2 7.66 0.94
 -5 4 -4 27.77 1.58
 -5 4 -4 23.29 1.69
 5 4 4 24.68 1.43
 -5 -4 -4 32.11 1.98
 -5 4 -5 31.23 1.75
 5 -4 5 25.45 1.72
 -5 5 5 0.44 0.55
 -5 5 5 1.73 0.96
 5 5 -5 -0.13 0.96
 5 -5 -5 0.81 0.88
 5 -5 -5 0.31 0.82
 -5 -5 5 -0.46 1.16
 -5 5 4 2.4 0.81
 5 5 -4 1.4 0.81
 5 -5 -4 1.12 0.86
 -5 -5 4 0.56 0.93
 -5 5 3 15.53 1.08
 -5 5 3 18.6 0.9
 5 5 -3 17.99 1.02
 5 -5 -3 16.7 1.01
 5 -5 -3 16.9 1.26
 -5 -5 3 17.6 1.13
 -5 5 2 11.18 0.99
 -5 5 2 14 0.95
 5 5 -2 12.38 1.03
 5 -5 -2 13.9 0.9
 5 -5 -2 11.07 1.26
 -5 -5 2 14.01 1.21
 -5 5 1 17.14 1.48
 5 5 -1 21.92 1.18
 5 -5 -1 20.11 1.53
 -5 -5 1 24.21 1.57
 -5 5 0 0.07 0.62
 5 5 0 -0.06 0.73
 5 5 0 -0.51 0.73
 -5 -5 0 0.41 1.13
 -5 5 -1 3.57 0.68
 -5 5 -1 2.43 0.58
 5 5 1 3.5 0.72
 5 5 1 3.23 0.81
 5 -5 1 3.67 0.81
 -5 5 -2 -1.13 0.66
 -5 5 -2 -0.44 0.56
 5 5 2 1.37 0.83
 5 -5 2 -1.64 0.85
 5 -5 2 -0.79 0.67
 -5 5 -3 2.34 0.65
 -5 5 -3 2.21 0.58
 5 5 3 3.09 0.82
 5 -5 3 2.55 0.88
 -5 -5 -3 2.45 0.92
 -5 5 -4 1.65 0.7
 5 5 4 -0.09 0.95
 5 -5 4 1.96 0.88
 -5 6 4 74.65 2.7
 -5 6 4 77.05 2.67
 5 6 -4 76.55 2.8
 5 6 -4 78.1 2.83
 5 -6 -4 61.11 2.76
 5 -6 -4 65.33 3.13
 -5 -6 4 82.75 3.32
 -5 -6 4 69.72 3
 -5 6 3 25.54 1.45
 5 6 -3 28.33 1.35
 5 6 -3 27.12 1.24
 5 -6 -3 26.11 1.5
 -5 -6 3 28.28 1.65
 -5 -6 3 25.76 1.47
 -5 6 2 12.27 0.81
 5 6 -2 10.72 0.83
 5 6 -2 11.42 1.05
 5 -6 -2 12.07 1.04
 -5 -6 2 12.09 1.01
 -5 -6 2 10.05 1.1
 -5 6 1 36.48 1.54
 -5 6 1 36.7 1.4
 5 6 -1 32.99 1.73
 5 6 -1 36.11 1.76
 5 -6 -1 34.5 1.45
 5 -6 -1 34.67 1.94
 -5 -6 1 38.26 1.57
 -5 6 0 112.59 4.16
 -5 6 0 113.69 3.81
 5 6 0 114.98 3.73
 5 6 0 111.28 3.97
 5 -6 0 111.64 3.81
 5 -6 0 109.7 4.15
 -5 -6 0 114.47 3.65
 -5 -6 0 114 4.19
 -5 6 -1 94.8 3.61
 -5 6 -1 97.26 3.13
 5 6 1 94.46 3.4
 5 6 1 94.49 3.41
 5 -6 1 83.78 4.02
 5 -6 1 98.72 3.55
 -5 -6 -1 98.66 3.33
 -5 -6 -1 88.28 4.17
 -5 6 -2 22.73 1.2
 -5 6 -2 22.84 1.14
 5 6 2 20.7 1.38
 5 -6 2 15.69 1.45
 -5 -6 -2 20.1 1.36
 5 6 3 3.64 0.77
 5 -6 3 5.92 1.1
 -5 -6 -3 4.7 0.92
 -5 7 1 3.19 0.71
 -5 7 1 3.03 0.58
 5 7 -1 3.49 0.8
 5 -7 -1 2.56 0.74
 5 -7 -1 2.92 0.82
 -5 -7 1 3.42 0.78
 -5 7 0 2.8 0.62
 -5 7 0 2.92 0.64
 5 7 0 2.31 0.77
 5 -7 0 4.63 0.81
 5 -7 0 1.95 0.78
 -5 -7 0 3.62 0.87
 -5 7 -1 96.59 3.28
 -5 7 -1 100.14 3.28
 5 7 1 101.28 3.29
 5 7 1 85.55 3.59
 5 -7 1 88.73 3.44
 -5 -7 -1 102.81 3.49
 -5 -7 -1 101.58 3.46

loop_
 _refln_index_h
 _refln_index_k
 _refln_index_l
 _refln_F_squared_calc
 _refln_F_squared_meas
 _refln_F_squared_sigma
 _refln_observed_status
   1   0   0      14958.72      16478.02       501.56 o
   2   0   0       2359.61       2504.16        46.42 o
   3   0   0         41.81         40.80         0.85 o
   4   0   0        120.24        125.28         3.18 o
   5   0   0         56.74         60.13         1.49 o
   1   1   0        249.11        231.64         3.37 o
   2   1   0         23.45         38.71         0.53 o
   3   1   0          0.17          0.17         0.17 o
   4   1   0         39.48         43.36         0.65 o
   5   1   0        133.85        128.84         2.73 o
   1   2   0        407.59        281.34         3.60 o
   2   2   0          1.49          0.12         0.16 o
   3   2   0        171.26        185.54         2.33 o
   4   2   0         31.94         36.24         0.73 o
   5   2   0          1.24          4.11         0.64 o
   1   3   0       1270.98        938.29        16.84 o
   2   3   0        606.15        615.02         6.87 o
   3   3   0        223.64        236.10         2.74 o
   4   3   0        199.15        203.60         2.36 o
   5   3   0         19.54         19.64         0.60 o
   0   4   0        183.60        181.75         2.95 o
   1   4   0         38.21         48.83         0.94 o
   2   4   0         88.08         95.55         1.18 o
   3   4   0         20.45         29.16         0.52 o
   4   4   0         17.80         16.82         0.45 o
   5   4   0          9.87          8.91         0.62 o
   1   5   0         72.60        132.04         2.91 o
   2   5   0        127.78        186.27         6.61 o
   3   5   0         47.71         57.76         2.36 o
   4   5   0        138.00        149.21         1.77 o
   5   5   0          0.16         -0.10         0.62 o
   0   6   0        797.45        717.80        27.73 o
   1   6   0        776.78        774.10        20.54 o
   2   6   0         71.88        105.11         2.16 o
   3   6   0        583.72        571.48         6.50 o
   4   6   0        135.30        135.89         1.81 o
   5   6   0        166.40        186.07         2.28 o
   1   7   0        360.10        399.00         8.87 o
   2   7   0         27.76         30.62         0.54 o
   3   7   0         13.53         14.73         0.37 o
   4   7   0         93.99        103.72         1.53 o
   5   7   0          6.95          5.22         0.57 o
   0   8   0        395.27        444.15        18.08 o
   1   8   0        147.62        174.24         4.40 o
   2   8   0         24.43         21.22         0.73 o
   3   8   0        268.86        266.61         3.09 o
   4   8   0          2.37          2.60         0.31 o
   1   9   0        133.51        152.81         3.10 o
   2   9   0         14.14         21.35         0.46 o
   3   9   0          8.38         10.56         0.28 o
   4   9   0         59.71         60.51         1.10 o
   0  10   0         79.50        191.45         8.53 o
   1  10   0         10.94         14.50         1.01 o
   2  10   0         78.34         93.65         1.16 o
   3  10   0          0.59          3.49         0.87 o
   4  10   0         96.53         90.96         1.13 o
   1  11   0        320.40        306.76         3.62 o
   2  11   0        141.93        144.91         1.91 o
   3  11   0        143.97        136.19         1.69 o
   4  11   0        123.96        132.74         1.66 o
   0  12   0       2807.25       2716.11        76.47 o
   1  12   0        833.36        821.78         9.17 o
   2  12   0        298.54        277.39         3.81 o
   3  12   0          4.81          4.02         0.29 o
   4  12   0         29.96         26.41         0.58 o
   1  13   0        109.62        132.22         2.24 o
   2  13   0         39.14         41.16         1.20 o
   3  13   0          9.44          8.61         0.35 o
   4  13   0        294.65        296.83         3.77 o
   0  14   0        771.80        803.73        12.98 o
   1  14   0        284.18        277.61         3.24 o
   2  14   0        213.95        201.31         3.34 o
   3  14   0          7.38          7.98         0.38 o
   1  15   0        420.87        426.90         4.81 o
   2  15   0         68.94         76.86         1.21 o
   3  15   0        115.35        113.12         1.66 o
   0  16   0        346.24        325.32         5.69 o
   1  16   0        169.92        166.57         2.05 o
   2  16   0         18.03         14.82         0.47 o
   3  16   0          4.14          3.87         0.42 o
   1  17   0         11.07          9.09         0.36 o
   2  17   0          4.25          3.03         0.39 o
   3  17   0          0.05          0.52         0.40 o
   0  18   0         97.03        113.62         2.25 o
   1  18   0         96.33        110.93         2.45 o
   2  18   0         10.58         10.34         0.57 o
   1  19   0         56.48         64.22         1.08 o
   2  19   0          1.84          0.65         0.54 o
   0  20   0          3.59          5.55         0.72 o
   1  20   0         13.33         13.11         0.96 o
  -5   0   1         66.83         63.08         1.65 o
  -4   0   1         34.57         31.31         0.69 o
  -3   0   1          4.24          5.71         0.29 o
  -2   0   1          6.67          5.49         0.80 o
  -1   0   1        185.82        262.95         7.40 o
   1   0   1       1001.65        744.80        40.23 o
   2   0   1        145.97        164.09         2.72 o
   3   0   1        125.26        108.34         1.87 o
   4   0   1        303.81        316.28         5.05 o
   5   0   1        236.47        254.43         4.24 o
  -5   1   1          0.95         12.30         2.17 o
  -4   1   1        105.54        124.84         3.27 o
  -3   1   1         11.53         11.27         0.29 o
  -2   1   1          0.50          2.68         0.30 o
   0   1   1        764.57        437.38         6.99 o
   1   1   1       6034.68       3941.53        68.63 o
   2   1   1         88.22         91.55         1.26 o
   3   1   1          6.31          8.97         0.26 o
   4   1   1         77.64         74.72         1.68 o
   5   1   1          3.18          1.56         0.43 o
  -5   2   1          1.41          1.31         0.80 o
  -4   2   1          1.19          1.30         0.24 o
  -3   2   1        198.68        199.17         2.89 o
  -2   2   1        700.32        812.24        14.26 o
  -1   2   1       1864.61       1547.65        38.41 o
   0   2   1        348.24        263.24         9.19 o
   1   2   1       1560.59       1496.82        46.65 o
   2   2   1       1407.71       1389.62        16.91 o
   3   2   1        367.16        365.12         5.75 o
   4   2   1          8.58          7.39         0.28 o
   5   2   1         59.65         59.57         1.94 o
  -5   3   1         69.83         71.83         1.13 o
  -4   3   1        187.97        192.42         2.23 o
  -3   3   1        171.91        183.01         2.16 o
  -2   3   1        403.11       1039.09        24.40 o
  -1   3   1         10.72        134.27         8.44 o
   0   3   1       3302.23       1717.49        55.57 o
   1   3   1        737.74        663.44        14.70 o
   2   3   1        552.61        628.10         9.90 o
   3   3   1         98.71        110.21         2.75 o
   4   3   1          4.29          4.62         0.28 o
   5   3   1          0.00          0.76         1.36 o
  -5   4   1         82.30         84.28         1.35 o
  -4   4   1         76.62         77.13         0.98 o
  -3   4   1         62.59         60.40         0.83 o
  -2   4   1          0.10          0.74         0.14 o
  -1   4   1        168.08        167.19         6.82 o
   0   4   1         26.58         19.73         0.65 o
   1   4   1        275.32        228.19         2.59 o
   2   4   1          0.42         -0.13         0.13 o
   3   4   1        157.90        167.60         2.01 o
   4   4   1         63.22         62.16         0.97 o
   5   4   1          1.57          0.91         0.50 o
  -5   5   1         35.77         34.93         2.11 o
  -4   5   1          0.00         -0.23         0.23 o
  -3   5   1          0.11          0.09         0.20 o
  -2   5   1        249.74        232.50         6.54 o
  -1   5   1         50.66         44.67         0.77 o
   0   5   1        939.79        719.85        29.99 o
   1   5   1         13.36         14.69         0.53 o
   2   5   1        262.18        392.76         6.72 o
   3   5   1         29.09         58.24         1.83 o
   4   5   1        236.79        242.56         2.80 o
   5   5   1          8.30          5.38         0.52 o
  -5   6   1         56.98         59.10         1.00 o
  -4   6   1         41.38         43.35         0.72 o
  -3   6   1         32.09         35.10         0.90 o
  -2   6   1          1.82          1.59         0.73 o
  -1   6   1         82.29        133.47         4.80 o
   0   6   1          5.97          9.18         0.34 o
   1   6   1        332.32        295.97         3.34 o
   2   6   1         33.19         37.91         0.88 o
   3   6   1        184.79        171.48         2.08 o
   4   6   1          4.69          3.83         0.25 o
   5   6   1        141.04        156.06         2.21 o
  -5   7   1          6.16          5.13         0.49 o
  -4   7   1        190.62        207.99         2.43 o
  -3   7   1          5.27          8.72         0.34 o
  -2   7   1        315.31        338.62         3.99 o
  -1   7   1        516.81        559.54        13.66 o
   0   7   1        288.87        316.43         3.65 o
   1   7   1        113.54        127.88         2.75 o
   2   7   1        461.47        434.76         4.91 o
   3   7   1         32.33         32.88         0.55 o
   4   7   1        272.80        273.82         3.10 o
   5   7   1        172.35        160.29         3.62 o
  -4   8   1          8.60          9.79         0.33 o
  -3   8   1         19.96         17.85         0.36 o
  -2   8   1          2.24          1.01         0.20 o
  -1   8   1        236.04        332.63         6.07 o
   0   8   1        292.41        327.03         3.74 o
   1   8   1          0.27         21.29         0.76 o
   2   8   1          8.17         10.48         0.52 o
   3   8   1          4.07          5.82         0.25 o
   4   8   1          6.26          6.36         0.38 o
  -4   9   1         30.40         28.77         0.99 o
  -3   9   1        535.57        511.08         5.69 o
  -2   9   1         82.96         76.39         1.70 o
  -1   9   1        265.16        250.08         3.47 o
   0   9   1         72.18         85.56         1.09 o
   1   9   1          2.90         22.88         1.62 o
   2   9   1        250.89        241.37         2.81 o
   3   9   1         45.84         45.95         1.00 o
   4   9   1         57.43         53.84         0.94 o
  -4  10   1         70.50         70.85         0.94 o
  -3  10   1         77.95         76.93         2.40 o
  -2  10   1        149.03        150.11         3.26 o
  -1  10   1          6.48         22.94         1.14 o
   0  10   1        328.51        337.81         5.02 o
   1  10   1        201.97        192.03         2.71 o
   2  10   1        248.58        259.53         3.08 o
   3  10   1         47.96         44.11         0.90 o
   4  10   1          3.29          3.06         0.33 o
  -4  11   1          1.94          1.33         0.36 o
  -3  11   1        152.42        152.06         2.00 o
  -2  11   1         92.09        138.78         4.94 o
  -1  11   1         30.98         44.71         1.63 o
   0  11   1         27.44         28.52         0.65 o
   1  11   1        215.34        187.99         2.44 o
   2  11   1         55.68         62.36         1.91 o
   3  11   1         98.94         96.02         1.27 o
   4  11   1        283.23        271.17         3.12 o
  -4  12   1         43.72         40.92         0.89 o
  -3  12   1        129.09        119.65         1.54 o
  -2  12   1        610.06        578.01         7.07 o
  -1  12   1        110.82        106.04         1.39 o
   0  12   1         23.58         21.20         0.52 o
   1  12   1          1.18          7.76         0.62 o
   2  12   1        117.88        140.70         2.92 o
   3  12   1        154.99        150.71         1.86 o
   4  12   1          0.76          1.05         0.39 o
  -4  13   1          3.02          2.36         0.50 o
  -3  13   1          6.23          5.29         0.28 o
  -2  13   1         54.91         58.71         1.05 o
  -1  13   1        992.39       1048.00        11.73 o
   0  13   1        883.09        865.52         9.63 o
   1  13   1       1328.77       1257.59        13.94 o
   2  13   1         78.10         76.59         1.11 o
   3  13   1         24.66         22.48         0.49 o
   4  13   1        267.98        272.39         3.34 o
  -3  14   1          2.04          0.90         0.31 o
  -2  14   1        251.68        240.83         2.94 o
  -1  14   1         15.46         20.64         0.44 o
   0  14   1         17.92         11.88         0.29 o
   1  14   1         55.56         45.65         0.72 o
   2  14   1         47.58         54.13         2.38 o
   3  14   1         13.16         10.66         0.38 o
  -3  15   1          0.83          0.40         0.37 o
  -2  15   1         31.96         29.40         0.66 o
  -1  15   1         24.28         17.55         0.36 o
   0  15   1         37.82         55.00         1.84 o
   1  15   1          4.49          7.17         0.26 o
   2  15   1        172.69        178.96         4.94 o
   3  15   1         27.65         21.71         0.86 o
  -3  16   1          1.41          0.15         0.56 o
  -2  16   1        112.72        107.04         1.41 o
  -1  16   1          4.11          4.98         0.28 o
   0  16   1          9.90          8.09         0.28 o
   1  16   1          4.90          4.48         0.37 o
   2  16   1        138.60        135.88         3.93 o
   3  16   1        196.62        195.65         3.00 o
  -3  17   1          0.90          0.08         1.04 o
  -2  17   1          3.69          3.36         0.38 o
  -1  17   1          2.90          1.60         0.31 o
   0  17   1          0.19          0.12         0.23 o
   1  17   1          0.06          0.04         0.23 o
   2  17   1          6.56          6.26         0.50 o
   3  17   1         15.67         13.69         0.90 o
  -2  18   1         88.17         84.17         1.51 o
  -1  18   1         29.44         28.55         0.69 o
   0  18   1          9.03         12.70         0.67 o
   1  18   1         41.53         41.92         1.10 o
   2  18   1         60.38         59.87         1.55 o
  -2  19   1         31.10         26.30         1.18 o
  -1  19   1         23.60         25.11         0.78 o
   0  19   1          0.04          0.20         0.42 o
   1  19   1          3.09          3.92         0.42 o
   2  19   1        132.21        109.25         2.47 o
  -1  20   1         23.90         25.13         0.73 o
   0  20   1         70.75         84.62         1.89 o
   1  20   1         27.05         25.58         0.84 o
   0  21   1         66.49         75.69         2.30 o
  -5   0   2         14.02         11.59         0.65 o
  -4   0   2          1.53          1.32         0.29 o
  -3   0   2         38.52         49.02         0.91 o
  -2   0   2       1697.90       1503.65        48.06 o
  -1   0   2       4947.50       3328.60       106.33 o
   0   0   2       1929.69       1435.37        66.91 o
   1   0   2          5.47        179.76        18.35 o
   2   0   2          5.64        138.13        11.36 o
   3   0   2         81.74        101.59         6.61 o
   4   0   2         17.68         19.98         0.51 o
   5   0   2          4.39          6.55         1.01 o
  -5   1   2         36.34         35.56         0.98 o
  -4   1   2         27.35         28.49         0.48 o
  -3   1   2        241.40        266.14         4.81 o
  -2   1   2       2303.23       1909.12        46.53 o
  -1   1   2       4478.95       3549.58       275.00 o
   0   1   2        611.99        478.60        15.59 o
   1   1   2       2738.31       2432.80        44.37 o
   2   1   2        564.27        749.67        29.95 o
   3   1   2         81.66         86.10         1.16 o
   4   1   2         14.58         15.77         0.35 o
   5   1   2         13.35         11.06         0.55 o
  -5   2   2         37.91         36.00         1.62 o
  -4   2   2         22.94         22.21         0.49 o
  -3   2   2        142.17        142.61         1.88 o
  -2   2   2        102.10        117.72         3.43 o
  -1   2   2       4532.42       3159.68        74.96 o
   0   2   2        156.48        131.67         1.81 o
   1   2   2       1578.11       1273.11        20.40 o
   2   2   2        384.03        364.09         7.33 o
   3   2   2        175.22        189.32         2.32 o
   4   2   2         82.31         95.34         3.22 o
   5   2   2          1.27          1.15         0.42 o
  -5   3   2         17.49         20.52         0.57 o
  -4   3   2          0.13         -0.04         0.23 o
  -3   3   2          1.14          1.86         0.22 o
  -2   3   2          0.79          1.35         0.28 o
  -1   3   2         35.98         45.43         0.82 o
   0   3   2         11.83          7.73         0.33 o
   1   3   2        105.44         88.24         1.34 o
   2   3   2         71.70         90.84         1.14 o
   3   3   2        110.98         97.74         1.69 o
   4   3   2          3.97          4.28         0.31 o
   5   3   2          3.51          5.52         0.71 o
  -5   4   2        107.05        112.00         1.46 o
  -4   4   2        107.75        116.74         1.49 o
  -3   4   2         62.74         73.82         0.96 o
  -2   4   2        198.21        204.33         2.40 o
  -1   4   2          2.25         13.39         1.56 o
   0   4   2        355.09        311.33         8.52 o
   1   4   2        286.96        239.09         2.89 o
   2   4   2         55.02         51.60         1.97 o
   3   4   2        114.60        107.66         1.53 o
   4   4   2         86.16         88.06         1.20 o
   5   4   2         19.26         17.50         1.12 o
  -5   5   2         19.65         21.40         0.89 o
  -4   5   2         10.52         10.88         0.35 o
  -3   5   2         71.98         86.25         1.79 o
  -2   5   2        795.83        777.26         8.90 o
  -1   5   2        488.97        485.43         5.44 o
   0   5   2        277.73        258.06         3.72 o
   1   5   2        337.32        379.77         4.31 o
   2   5   2         53.71        127.08         4.13 o
   3   5   2        666.87        676.00         7.61 o
   4   5   2          1.08          1.64         0.24 o
   5   5   2          0.05         -0.65         0.65 o
  -5   6   2         20.35         19.01         0.64 o
  -4   6   2         10.38         10.23         0.37 o
  -3   6   2        142.60        142.87         1.90 o
  -2   6   2        317.72        305.37         4.11 o
  -1   6   2        224.72        314.22         7.19 o
   0   6   2        386.29        397.06         9.41 o
   1   6   2        135.16        153.21         4.11 o
   2   6   2          6.84         15.60         1.77 o
   3   6   2        351.27        349.39         4.68 o
   4   6   2         26.85         20.74         0.49 o
   5   6   2         43.80         34.79         1.68 o
  -4   7   2          0.11         -0.24         0.24 o
  -3   7   2          1.24          1.40         0.20 o
  -2   7   2        190.08        188.56         2.73 o
  -1   7   2         20.08         55.90         1.31 o
   0   7   2        512.02        542.60         8.54 o
   1   7   2        310.03        325.56         5.32 o
   2   7   2         10.75         14.89         0.50 o
   3   7   2          8.71          9.07         0.53 o
   4   7   2        197.87        194.11         2.27 o
  -4   8   2        187.76        190.83         2.26 o
  -3   8   2          2.85          2.07         0.20 o
  -2   8   2        422.86        411.57         7.49 o
  -1   8   2        103.58        118.19         1.78 o
   0   8   2         38.54         51.23         0.65 o
   1   8   2        320.69        282.26         3.24 o
   2   8   2         90.60        115.86         2.53 o
   3   8   2         16.52         12.40         0.28 o
   4   8   2         34.26         32.31         0.56 o
  -4   9   2          9.99          9.05         0.42 o
  -3   9   2         87.37         98.73         1.25 o
  -2   9   2        408.56        439.87         5.89 o
  -1   9   2        268.81        293.99         5.54 o
   0   9   2          7.68          5.67         0.20 o
   1   9   2         17.99         41.57         1.07 o
   2   9   2         90.26        112.69         2.49 o
   3   9   2          0.35          0.24         0.23 o
   4   9   2          6.00          4.80         0.31 o
  -4  10   2        281.14        291.07         3.38 o
  -3  10   2        137.05        128.81         1.53 o
  -2  10   2        198.67        196.43         2.60 o
  -1  10   2         61.59         39.12         0.79 o
   0  10   2          9.17          9.08         0.20 o
   1  10   2          9.35         15.56         0.32 o
   2  10   2        216.70        205.05         2.46 o
   3  10   2        131.98        125.10         1.56 o
   4  10   2         54.66         55.69         0.90 o
  -4  11   2         50.89         48.90         1.05 o
  -3  11   2        369.91        349.94         4.03 o
  -2  11   2        431.17        393.31         7.70 o
  -1  11   2        392.41        388.79         7.02 o
   0  11   2        119.86        105.70         1.70 o
   1  11   2        287.13        309.67         4.17 o
   2  11   2         20.97         33.37         1.90 o
   3  11   2        543.89        532.43         5.98 o
   4  11   2         10.41         10.58         0.73 o
  -4  12   2          0.91          0.16         0.40 o
  -3  12   2          4.60          2.63         0.44 o
  -2  12   2          8.29          9.52         0.52 o
  -1  12   2         26.06         27.11         0.63 o
   0  12   2         73.54         81.66         3.19 o
   1  12   2         57.00         70.02         1.88 o
   2  12   2        189.75        173.85         2.06 o
   3  12   2        299.75        282.99         3.26 o
   4  12   2         29.43         31.38         0.81 o
  -4  13   2          6.87          4.69         0.67 o
  -3  13   2        253.79        248.68         3.11 o
  -2  13   2        129.17        126.63         1.65 o
  -1  13   2        150.32        149.43         1.84 o
   0  13   2        247.86        232.01         2.87 o
   1  13   2         94.52         94.48         1.42 o
   2  13   2          5.47          6.34         0.51 o
   3  13   2         94.82         85.46         1.29 o
   4  13   2         13.73         11.63         0.82 o
  -3  14   2        127.52        118.53         1.76 o
  -2  14   2         16.09         18.41         0.75 o
  -1  14   2          0.30          1.58         0.26 o
   0  14   2        179.46        204.61         4.03 o
   1  14   2         31.80         24.73         0.49 o
   2  14   2         13.14         13.23         0.37 o
   3  14   2        140.44        146.35         1.98 o
  -3  15   2         29.14         22.83         1.59 o
  -2  15   2         36.44         33.25         0.61 o
  -1  15   2         10.53         13.96         0.62 o
   0  15   2         83.70         72.89         1.48 o
   1  15   2         67.09         60.65         0.95 o
   2  15   2         15.60         16.57         0.45 o
   3  15   2         12.00         15.20         0.65 o
  -3  16   2         60.81         55.97         1.19 o
  -2  16   2        105.49         96.69         1.29 o
  -1  16   2         21.86         27.56         0.52 o
   0  16   2          3.39          3.17         0.21 o
   1  16   2         75.56         71.83         1.01 o
   2  16   2         10.99          8.86         0.78 o
   3  16   2          2.83          3.11         0.92 o
  -3  17   2         48.95         46.20         1.97 o
  -2  17   2        171.33        164.24         2.03 o
  -1  17   2         56.24         55.09         1.51 o
   0  17   2          6.18          6.41         0.70 o
   1  17   2         10.76         15.49         0.49 o
   2  17   2         18.07         14.17         0.67 o
   3  17   2        135.25        115.64         2.24 o
  -2  18   2          0.21          0.12         0.46 o
  -1  18   2          0.19          9.91         0.66 o
   0  18   2          1.97          1.52         0.29 o
   1  18   2        146.95        141.13         1.93 o
   2  18   2         83.30         85.92         1.53 o
  -2  19   2         12.96          9.84         0.48 o
  -1  19   2         58.72         69.21         1.29 o
   0  19   2          2.01          3.91         0.47 o
   1  19   2         63.83         75.29         2.19 o
   2  19   2         13.21         11.13         0.87 o
  -1  20   2        128.34        123.24         3.39 o
   0  20   2        112.08        118.17         1.76 o
   1  20   2          5.98         12.27         0.75 o
   0  21   2         39.93         39.78         1.17 o
  -5   0   3          8.69          7.56         1.21 o
  -4   0   3          5.43          6.14         0.46 o
  -3   0   3        520.04        553.78        13.17 o
  -2   0   3       1008.65       1040.12        16.30 o
  -1   0   3         45.10         43.71         1.96 o
   0   0   3          1.08          1.32         0.09 o
   1   0   3         38.47         39.14         2.07 o
   2   0   3        693.75        755.13        15.51 o
   3   0   3         55.66         57.31         1.07 o
   4   0   3         12.54         11.99         0.42 o
   5   0   3         21.15         19.44         1.03 o
  -5   1   3          0.00         -0.01         0.34 o
  -4   1   3         18.87         20.78         0.80 o
  -3   1   3         61.41         56.59         1.88 o
  -2   1   3       2797.92       2040.62        41.30 o
  -1   1   3        306.62        318.03         9.20 o
   0   1   3       1587.23       1163.71        23.99 o
   1   1   3        807.59        660.58        25.38 o
   2   1   3        798.44       1018.50        36.51 o
   3   1   3        265.41        283.97         3.35 o
   4   1   3         55.43         60.93         1.13 o
   5   1   3         22.88         22.48         0.91 o
  -5   2   3          4.18          5.14         0.48 o
  -4   2   3          0.04          2.63         0.68 o
  -3   2   3         56.85         71.12         2.36 o
  -2   2   3        119.42        127.26         2.06 o
  -1   2   3         55.23         64.04         1.81 o
   0   2   3          2.23          3.30         0.18 o
   1   2   3         77.64         65.52         0.77 o
   2   2   3         14.81          9.83         0.55 o
   3   2   3         16.48         18.32         0.33 o
   4   2   3         18.30         17.46         0.43 o
   5   2   3          2.34          2.15         0.39 o
  -5   3   3          9.92         11.77         0.81 o
  -4   3   3          0.11          0.20         0.25 o
  -3   3   3          2.20          2.23         0.22 o
  -2   3   3        290.37        308.73         3.87 o
  -1   3   3        100.48         76.83         1.85 o
   0   3   3          5.45          4.64         0.12 o
   1   3   3        110.54         82.34         1.04 o
   2   3   3          3.22          0.77         0.25 o
   3   3   3        316.04        333.40         3.85 o
   4   3   3         73.81         75.04         1.22 o
   5   3   3         24.60         23.45         1.24 o
  -5   4   3          5.38          5.98         0.42 o
  -4   4   3         15.12         14.87         0.44 o
  -3   4   3        321.23        333.08         5.33 o
  -2   4   3        366.73        539.05         8.00 o
  -1   4   3        460.56        457.19        13.28 o
   0   4   3        438.60        621.60         9.88 o
   1   4   3         47.41        204.46         4.40 o
   2   4   3       1577.97       1457.83        40.22 o
   3   4   3        162.40        172.84         2.82 o
   4   4   3        167.23        181.63         4.53 o
  -5   5   3         33.67         28.65         0.71 o
  -4   5   3         73.24         74.51         1.01 o
  -3   5   3         69.54         62.09         0.83 o
  -2   5   3         16.00         65.83         2.06 o
  -1   5   3        942.93        801.16         9.03 o
   0   5   3        183.10        184.87         2.31 o
   1   5   3          2.71         86.59         1.74 o
   2   5   3        705.42        717.08         8.95 o
   3   5   3          0.06          0.15         0.16 o
   4   5   3         25.53         23.25         0.43 o
   5   5   3          3.86          4.11         0.54 o
  -5   6   3         41.18         44.35         0.96 o
  -4   6   3         28.58         27.57         0.60 o
  -3   6   3         16.46         21.05         0.44 o
  -2   6   3         44.92         77.38         2.61 o
  -1   6   3        524.49        525.36         8.73 o
   0   6   3        301.89        356.79         8.17 o
   1   6   3        138.02        190.00         3.27 o
   2   6   3        588.55        612.17         6.85 o
   3   6   3         46.87         39.74         0.57 o
   4   6   3          1.87          2.48         0.26 o
   5   6   3          8.85          7.69         0.90 o
  -4   7   3        163.97        169.41         2.86 o
  -3   7   3         52.99         54.19         1.01 o
  -2   7   3         82.82         69.76         1.52 o
  -1   7   3       1287.72       1295.78        37.15 o
   0   7   3        378.01        479.99         6.23 o
   1   7   3       1250.60       1269.97        24.32 o
   2   7   3         11.99          8.19         0.59 o
   3   7   3         10.68         10.78         0.28 o
   4   7   3          0.32          0.48         0.26 o
  -4   8   3         29.52         30.64         0.57 o
  -3   8   3        221.60        216.52         2.51 o
  -2   8   3         78.33         91.63         2.03 o
  -1   8   3          6.45         36.81         1.64 o
   0   8   3         62.49         71.55         1.66 o
   1   8   3        339.76        310.93         3.58 o
   2   8   3        161.02        170.39         2.02 o
   3   8   3         14.04         13.89         0.48 o
   4   8   3        130.03        132.43         1.57 o
  -4   9   3          0.04          0.37         0.34 o
  -3   9   3         86.99         85.72         2.85 o
  -2   9   3         26.74         33.33         0.88 o
  -1   9   3          0.03          3.54         0.69 o
   0   9   3        146.04        140.99         3.36 o
   1   9   3         68.92         63.44         0.86 o
   2   9   3         40.32         59.09         1.14 o
   3   9   3         52.59         56.91         1.19 o
   4   9   3        113.37        119.85         1.46 o
  -4  10   3         56.38         54.97         1.45 o
  -3  10   3         90.76         87.78         1.15 o
  -2  10   3          5.86         11.56         0.48 o
  -1  10   3         36.44         31.17         0.77 o
   0  10   3          1.12          0.74         0.17 o
   1  10   3        121.65        111.86         1.38 o
   2  10   3        232.35        213.05         2.48 o
   3  10   3          2.28          3.11         0.26 o
   4  10   3        117.92        117.48         1.64 o
  -4  11   3          2.60          3.15         0.34 o
  -3  11   3          2.90          2.52         0.31 o
  -2  11   3          0.33          8.89         0.82 o
  -1  11   3         15.36         61.62         1.80 o
   0  11   3        179.79        155.31         1.86 o
   1  11   3        628.26        574.24         6.57 o
   2  11   3        441.77        416.67         4.81 o
   3  11   3          5.77          7.78         0.30 o
   4  11   3         82.16         77.38         1.52 o
  -4  12   3          8.19          6.39         0.42 o
  -3  12   3         23.97         21.08         0.51 o
  -2  12   3        308.23        345.71         4.20 o
  -1  12   3        645.42        567.63         6.55 o
   0  12   3         34.44         30.52         0.49 o
   1  12   3         84.05        124.92         2.26 o
   2  12   3        729.38        674.81         7.58 o
   3  12   3         56.95         51.46         1.15 o
   4  12   3          1.81          1.40         0.99 o
  -4  13   3         48.83         52.49         2.72 o
  -3  13   3         31.80         32.01         1.07 o
  -2  13   3         52.65         53.61         0.80 o
  -1  13   3         13.45         11.53         0.28 o
   0  13   3        186.81        162.46         2.21 o
   1  13   3         31.84         26.78         0.47 o
   2  13   3        126.22        120.75         2.63 o
   3  13   3          8.65          8.88         0.38 o
   4  13   3         27.78         25.19         3.62 o
  -3  14   3         13.39         12.80         0.49 o
  -2  14   3          1.45          2.21         0.34 o
  -1  14   3         59.52         46.99         1.10 o
   0  14   3        158.12        152.65         2.14 o
   1  14   3          1.14          3.87         0.65 o
   2  14   3         97.14         82.23         1.48 o
   3  14   3          1.87          2.01         0.40 o
  -3  15   3        104.24        102.73         1.36 o
  -2  15   3         71.02         74.42         1.03 o
  -1  15   3         32.32         28.75         0.54 o
   0  15   3        206.81        196.08         2.60 o
   1  15   3          1.62          3.49         0.39 o
   2  15   3         12.81         11.80         0.47 o
   3  15   3         39.92         34.57         0.91 o
  -3  16   3        138.60        128.36         1.65 o
  -2  16   3         66.74         64.83         0.94 o
  -1  16   3          2.59          4.27         0.24 o
   0  16   3         67.70         65.87         1.16 o
   1  16   3          4.55          2.79         0.28 o
   2  16   3         69.60         60.65         1.55 o
   3  16   3          3.91          2.78         0.65 o
  -3  17   3          5.88          5.17         0.81 o
  -2  17   3          1.44          2.69         0.43 o
  -1  17   3         11.10         13.88         0.91 o
   0  17   3          1.10          2.32         0.37 o
   1  17   3         20.18         25.14         0.94 o
   2  17   3         74.83         77.85         1.30 o
   3  17   3          6.80          3.04         0.67 o
  -2  18   3          0.05         -0.58         0.58 o
  -1  18   3          6.37          8.41         0.49 o
   0  18   3         15.59         23.49         0.59 o
   1  18   3         43.81         41.42         1.03 o
   2  18   3        246.94        251.32         3.25 o
  -2  19   3         36.86         33.59         1.15 o
  -1  19   3         81.28         81.35         1.72 o
   0  19   3          2.94          6.63         0.73 o
   1  19   3         48.92         43.55         1.22 o
   2  19   3         41.00         30.96         0.92 o
  -1  20   3          0.22          4.31         0.72 o
   0  20   3        166.73        205.06         4.11 o
   1  20   3         92.45         90.27         2.28 o
   0  21   3         45.30         49.55         1.03 o
  -5   0   4         48.57         62.17         1.31 o
  -4   0   4         31.40         32.51         0.97 o
  -3   0   4       1620.25       1599.90        25.23 o
  -2   0   4        313.65        281.36         7.60 o
  -1   0   4        228.45        197.07         3.26 o
   0   0   4        409.65        324.10         9.59 o
   1   0   4          5.11          9.06         0.84 o
   2   0   4          0.77          9.28         1.17 o
   3   0   4         24.53         32.15         1.01 o
   4   0   4          5.30          6.43         0.40 o
   5   0   4         69.80         75.08         2.36 o
  -5   1   4          5.32          5.52         0.35 o
  -4   1   4         30.08         26.13         0.45 o
  -3   1   4         47.08         51.04         0.86 o
  -2   1   4        964.28        905.20        11.62 o
  -1   1   4         21.99         12.36         0.35 o
   0   1   4        345.76        313.94         3.50 o
   1   1   4          0.18          0.67         0.15 o
   2   1   4         59.32         64.39         1.33 o
   3   1   4          1.14          4.07         0.50 o
   4   1   4         25.67         26.94         0.68 o
   5   1   4          4.63          5.01         0.60 o
  -5   2   4         25.96         26.83         2.17 o
  -4   2   4         66.29         64.74         1.13 o
  -3   2   4        140.67        163.09         5.35 o
  -2   2   4        533.52        584.17         7.70 o
  -1   2   4         34.30         26.91         1.03 o
   0   2   4        186.58        181.84         2.92 o
   1   2   4         15.82         14.63         0.66 o
   2   2   4        172.16        207.78         4.38 o
   3   2   4         25.14         26.57         0.42 o
   4   2   4          3.12          4.12         0.28 o
   5   2   4          2.55          1.67         0.75 o
  -5   3   4         31.62         27.69         0.86 o
  -4   3   4         81.89         86.28         2.24 o
  -3   3   4        142.33        161.84         2.51 o
  -2   3   4        490.69        528.44         7.51 o
  -1   3   4        151.46        208.42         4.27 o
   0   3   4         87.73         74.80         1.39 o
   1   3   4        638.20        592.09        17.47 o
   2   3   4          0.00          0.68         0.36 o
   3   3   4          3.61          3.79         0.21 o
   4   3   4          4.51          4.49         0.29 o
   5   3   4          4.80          4.62         0.65 o
  -5   4   4        108.30        120.71         1.53 o
  -4   4   4         95.79        101.26         1.30 o
  -3   4   4        207.61        199.50         2.37 o
  -2   4   4         11.13         14.26         0.43 o
  -1   4   4         19.91         28.26         2.85 o
   0   4   4         38.69         37.82         0.52 o
   1   4   4        386.26        351.20         3.91 o
   2   4   4         19.46         21.08         0.46 o
   3   4   4        240.14        233.54         2.79 o
   4   4   4         11.84         10.66         0.69 o
   5   4   4         40.65         44.17         2.83 o
  -5   5   4          2.68          2.31         0.70 o
  -4   5   4         23.08         27.10         1.13 o
  -3   5   4          1.97          1.35         0.49 o
  -2   5   4          3.15          6.39         2.16 o
  -1   5   4          1.35         98.60         5.55 o
   0   5   4         86.61         92.93         1.39 o
   1   5   4       1008.36        924.13        20.01 o
   2   5   4         75.22         62.88         0.77 o
   3   5   4         26.91         28.39         0.46 o
   4   5   4          0.41          0.60         0.27 o
   5   5   4          1.60          2.05         0.96 o
  -5   6   4        117.91        121.38         3.55 o
  -4   6   4         10.56          9.86         0.46 o
  -3   6   4        266.72        252.78         2.97 o
  -2   6   4        629.04        650.33         7.43 o
  -1   6   4       1003.37       1038.63        19.48 o
   0   6   4       3572.00       2758.01        83.45 o
   1   6   4        220.22        344.32         5.49 o
   2   6   4        471.27        483.71         8.70 o
   3   6   4         44.74         52.62         0.70 o
   4   6   4         19.74         23.05         1.11 o
  -4   7   4          1.26          3.02         0.32 o
  -3   7   4         89.66         88.14         1.69 o
  -2   7   4        252.85        247.99         4.35 o
  -1   7   4        413.34        438.05         7.59 o
   0   7   4        620.01       1253.18        20.65 o
   1   7   4        588.42        645.55        10.55 o
   2   7   4         10.54         36.98         3.09 o
   3   7   4         37.78         28.65         0.64 o
   4   7   4        107.75        105.84         1.29 o
  -4   8   4         12.92         12.86         0.51 o
  -3   8   4        281.94        275.02         4.18 o
  -2   8   4         98.21        120.16         1.51 o
  -1   8   4         28.10         49.06         0.93 o
   0   8   4        560.61        585.47        10.36 o
   1   8   4         83.18         76.07         1.61 o
   2   8   4          6.97          8.34         0.67 o
   3   8   4          4.87          3.28         0.28 o
   4   8   4         13.52         12.55         0.41 o
  -4   9   4        125.54        125.62         1.61 o
  -3   9   4         92.27         84.06         1.47 o
  -2   9   4        102.60         99.43         1.93 o
  -1   9   4        152.60        153.32         1.93 o
   0   9   4          4.11          3.79         0.16 o
   1   9   4         29.65         24.72         0.68 o
   2   9   4        131.08        136.93         1.63 o
   3   9   4        348.28        345.72         3.91 o
   4   9   4          0.34          0.45         0.36 o
  -4  10   4         28.75         25.83         0.78 o
  -3  10   4         92.59         96.56         1.40 o
  -2  10   4         38.47         54.38         1.32 o
  -1  10   4         18.64         28.59         1.09 o
   0  10   4          0.22          0.17         0.16 o
   1  10   4        162.97        159.15         1.93 o
   2  10   4        262.37        252.53         2.94 o
   3  10   4        134.29        127.55         1.75 o
   4  10   4         21.04         20.28         0.70 o
  -4  11   4         47.15         39.88         2.22 o
  -3  11   4         24.51         20.97         0.67 o
  -2  11   4          3.96          4.84         0.48 o
  -1  11   4         11.80         16.67         1.89 o
   0  11   4        166.34        173.41         2.38 o
   1  11   4        260.90        235.72         4.40 o
   2  11   4        103.44        104.32         1.32 o
   3  11   4         26.16         28.16         0.52 o
   4  11   4          9.16          6.39         0.52 o
  -4  12   4         16.69         13.29         0.81 o
  -3  12   4         23.61         20.16         0.67 o
  -2  12   4          4.31          3.17         0.35 o
  -1  12   4         66.34         65.36         1.06 o
   0  12   4          8.15          2.76         0.20 o
   1  12   4          0.12          3.20         0.41 o
   2  12   4        118.44        110.33         1.38 o
   3  12   4        142.64        140.20         2.08 o
   4  12   4          1.17          1.38         0.48 o
  -4  13   4         18.71         13.63         1.75 o
  -3  13   4          2.64          2.21         0.31 o
  -2  13   4          0.28          1.69         0.57 o
  -1  13   4        154.64        148.06         1.82 o
   0  13   4         16.27         16.21         0.52 o
   1  13   4        222.84        213.15         2.59 o
   2  13   4         57.85         53.47         0.79 o
   3  13   4         16.31         13.52         0.58 o
   4  13   4         89.16         93.17         2.00 o
  -3  14   4          3.11          2.59         0.35 o
  -2  14   4         17.43         16.54         0.42 o
  -1  14   4        260.62        229.93         2.78 o
   0  14   4         28.27         23.73         0.49 o
   1  14   4          3.90         13.17         0.95 o
   2  14   4         88.32         78.57         1.51 o
   3  14   4          1.63          0.88         0.32 o
  -3  15   4          0.12         -0.39         0.39 o
  -2  15   4          8.44          6.35         0.42 o
  -1  15   4         87.68         86.71         2.37 o
   0  15   4          1.32          0.95         0.21 o
   1  15   4         16.33         17.30         0.90 o
   2  15   4          5.15          5.54         0.48 o
   3  15   4         12.59         11.06         0.75 o
  -3  16   4         91.92         81.32         2.72 o
  -2  16   4          2.33          2.19         0.38 o
  -1  16   4         67.95         67.82         2.07 o
   0  16   4          0.16          0.18         0.25 o
   1  16   4         15.95         19.55         1.07 o
   2  16   4         60.69         47.79         0.91 o
   3  16   4          0.09         -0.08         0.68 o
  -3  17   4         26.81         22.01         0.72 o
  -2  17   4         28.52         26.40         0.64 o
  -1  17   4          8.56         11.46         0.51 o
   0  17   4         23.63         21.63         0.67 o
   1  17   4        120.07        119.84         3.42 o
   2  17   4          0.28          0.49         0.42 o
   3  17   4          0.32          0.99         0.64 o
  -2  18   4          3.38          2.56         0.40 o
  -1  18   4         13.80         17.18         0.58 o
   0  18   4         78.08         93.72         1.48 o
   1  18   4          0.00          1.04         0.54 o
   2  18   4         26.87         25.72         1.08 o
  -2  19   4          2.29          1.43         0.85 o
  -1  19   4         99.43        112.45         1.57 o
   0  19   4         52.97         61.93         1.01 o
   1  19   4        104.35        116.80         3.06 o
   2  19   4          8.90          6.38         1.25 o
  -1  20   4          0.94          0.50         0.41 o
   0  20   4        120.32        133.29         2.26 o
   1  20   4          1.02          2.95         0.64 o
  -5   0   5         96.23         95.75         1.84 o
  -4   0   5         54.62         52.97         1.99 o
  -3   0   5        726.28        801.71        34.07 o
  -1   0   5        234.71        301.35         5.67 o
   0   0   5        980.74        822.16        14.89 o
   1   0   5        466.61        446.05        19.30 o
   2   0   5        110.18        434.91         7.57 o
   3   0   5        449.59        449.97         7.24 o
   4   0   5        208.36        218.19         6.08 o
   5   0   5        624.67        688.67        11.16 o
  -5   1   5          6.22          5.48         0.56 o
  -4   1   5        155.16        161.04         1.91 o
  -3   1   5        316.99        322.44         3.65 o
  -2   1   5        218.24        195.82         3.38 o
  -1   1   5         21.57         52.58         2.19 o
   0   1   5          2.47          3.23         0.10 o
   1   1   5        513.24        402.36        10.81 o
   2   1   5        379.65        395.98         4.45 o
   3   1   5        177.49        171.36         2.40 o
   4   1   5         13.00         15.57         0.38 o
   5   1   5        119.05        120.72         2.21 o
  -5   2   5          0.50          0.12         0.88 o
  -4   2   5         99.33        101.98         1.37 o
  -3   2   5        435.62        472.88         5.40 o
  -2   2   5         12.43         20.36         0.65 o
  -1   2   5          7.79          5.01         0.31 o
   0   2   5         19.99         14.91         0.46 o
   1   2   5         26.27         33.81         0.63 o
   2   2   5         57.23         54.96         0.69 o
   3   2   5          1.90          0.64         0.27 o
   4   2   5         37.19         59.64         1.22 o
   5   2   5         23.17         39.58         2.96 o
  -5   3   5        161.12        159.87         3.68 o
  -4   3   5        275.58        282.36         3.60 o
  -3   3   5        707.94        700.82         7.87 o
  -2   3   5        168.67        182.74         4.55 o
  -1   3   5        378.55        373.36         4.30 o
   0   3   5          4.86          5.29         0.13 o
   1   3   5        164.31        186.22         6.70 o
   2   3   5        371.49        390.53         4.78 o
   3   3   5         70.56         73.70         1.13 o
   4   3   5          4.50          3.92         0.47 o
   5   3   5          3.49          5.20         0.94 o
  -5   4   5         55.51         57.34         0.99 o
  -4   4   5         85.55         85.15         1.52 o
  -3   4   5        260.37        248.21         2.89 o
  -2   4   5        198.62        190.53         2.27 o
  -1   4   5         57.65         91.34         2.40 o
   0   4   5        246.32        248.86         2.81 o
   1   4   5        405.97        376.02         5.50 o
   2   4   5         31.00         34.05         0.58 o
   3   4   5        159.71        158.47         1.86 o
   4   4   5        144.57        142.55         1.72 o
   5   4   5         54.61         47.11         4.76 o
  -5   5   5          0.33          0.78         0.55 o
  -4   5   5        162.96        179.12         3.85 o
  -3   5   5         19.80         14.26         0.43 o
  -2   5   5          2.17         44.28         1.26 o
  -1   5   5         81.58        170.65         5.24 o
   0   5   5          6.43         25.87         0.78 o
   1   5   5        687.68        645.94        13.94 o
   2   5   5        263.96        266.88         3.32 o
   3   5   5         17.67         18.67         0.60 o
   4   5   5          0.06         -0.07         0.30 o
  -4   6   5         89.70         92.59         1.22 o
  -3   6   5          8.53          9.88         0.48 o
  -2   6   5          6.66          8.48         0.44 o
  -1   6   5         20.50         29.64         0.65 o
   0   6   5        790.77        831.04        19.48 o
   1   6   5          6.41          6.69         0.25 o
   2   6   5        186.22        168.76         2.01 o
   3   6   5        154.61        156.81         1.86 o
   4   6   5         57.62         60.49         0.88 o
  -4   7   5        110.22        115.37         2.39 o
  -3   7   5        183.21        192.08         2.66 o
  -2   7   5         22.51         33.26         0.54 o
  -1   7   5        496.82        537.75         7.71 o
   0   7   5         14.90         31.67         0.49 o
   1   7   5        527.77        577.00         6.45 o
   2   7   5          0.00          0.15         0.17 o
   3   7   5          1.25          0.68         0.21 o
   4   7   5         17.23         15.96         0.49 o
  -4   8   5          1.15          1.21         0.35 o
  -3   8   5         13.94         21.64         0.57 o
  -2   8   5         54.67         71.02         2.65 o
  -1   8   5         11.76         14.11         0.40 o
   0   8   5          2.97          2.79         0.22 o
   1   8   5         11.17         11.28         0.58 o
   2   8   5        110.40        117.18         1.66 o
   3   8   5        215.75        208.83         2.41 o
   4   8   5         18.35         18.84         0.51 o
  -4   9   5        361.97        368.69         4.25 o
  -3   9   5         41.47         38.60         0.75 o
  -2   9   5         34.61         34.41         0.52 o
  -1   9   5         18.75         34.13         0.97 o
   0   9   5        259.93        284.75         3.34 o
   1   9   5        236.78        235.71         2.74 o
   2   9   5          7.23         12.32         0.27 o
   3   9   5         84.94         85.89         1.16 o
   4   9   5          0.12          0.04         0.36 o
  -4  10   5         21.01         17.01         1.13 o
  -3  10   5         67.39         65.40         1.56 o
  -2  10   5        147.70        131.99         1.79 o
  -1  10   5         48.57         46.44         1.05 o
   0  10   5        653.70        641.82        13.14 o
   1  10   5         70.02         68.76         1.35 o
   2  10   5          4.73          8.45         0.33 o
   3  10   5        194.69        179.90         2.46 o
   4  10   5         39.30         36.48         1.00 o
  -4  11   5         24.25         21.46         1.43 o
  -3  11   5          0.08          0.19         0.22 o
  -2  11   5         58.69         51.32         0.74 o
  -1  11   5          0.00         11.97         1.87 o
   0  11   5         90.15         86.17         1.08 o
   1  11   5        492.99        401.02         4.60 o
   2  11   5         42.43         49.06         0.68 o
   3  11   5         21.69         18.50         0.47 o
   4  11   5         30.34         28.06         1.23 o
  -3  12   5         63.05         55.67         0.80 o
  -2  12   5        304.56        279.05         3.40 o
  -1  12   5         31.30         42.74         1.23 o
   0  12   5        448.95        437.25         5.75 o
   1  12   5        386.49        340.47         4.06 o
   2  12   5         81.96         80.87         2.13 o
   3  12   5         40.04         41.13         0.81 o
   4  12   5         11.98          8.92         0.60 o
  -3  13   5         12.17         11.59         0.39 o
  -2  13   5        148.24        140.51         1.76 o
  -1  13   5         72.64        180.06         6.57 o
   0  13   5         67.62         57.79         2.18 o
   1  13   5        575.63        497.95         8.46 o
   2  13   5         40.44         29.24         0.73 o
   3  13   5        122.74        114.25         1.51 o
  -3  14   5         10.45          6.57         0.50 o
  -2  14   5        146.05        126.69         1.62 o
  -1  14   5          5.72          8.63         0.74 o
   0  14   5         54.64         48.62         0.99 o
   1  14   5         47.06         41.49         0.91 o
   2  14   5          1.59          1.91         0.33 o
   3  14   5         22.68         21.83         1.77 o
  -3  15   5        131.42        130.68         2.40 o
  -2  15   5          3.19          3.34         0.35 o
  -1  15   5         99.01         95.56         1.29 o
   0  15   5         37.67         34.87         0.76 o
   1  15   5         16.38         16.19         0.45 o
   2  15   5          1.47          0.72         0.30 o
   3  15   5          9.07          8.98         1.18 o
  -3  16   5         17.37         16.90         0.60 o
  -2  16   5         40.63         36.66         1.01 o
  -1  16   5         31.85         28.36         0.54 o
   0  16   5         57.58         59.75         1.11 o
   1  16   5          0.12          0.62         0.30 o
   2  16   5         14.32         10.88         0.87 o
   3  16   5         28.20         23.37         1.63 o
  -2  17   5         11.02          9.47         0.41 o
  -1  17   5         12.42         15.50         0.71 o
   0  17   5          3.33          3.03         0.29 o
   1  17   5         85.23         80.24         1.71 o
   2  17   5         16.40         13.89         0.86 o
  -2  18   5          7.60          6.22         0.48 o
  -1  18   5          8.79         12.33         0.49 o
   0  18   5         10.97         19.19         2.08 o
   1  18   5         22.53         29.68         1.26 o
   2  18   5          2.81          1.13         0.77 o
  -1  19   5        158.52        177.04         2.67 o
   0  19   5         24.61         35.24         1.23 o
   1  19   5        105.38        121.31         3.81 o
  -1  20   5          1.26          2.21         0.50 o
   0  20   5          1.08          1.22         0.52 o
   1  20   5         35.05         36.40         1.42 o
  -5   0   6         20.75         19.17         0.67 o
  -4   0   6        388.05        419.33         6.64 o
  -3   0   6        124.78        120.20         2.05 o
  -2   0   6         38.94         85.41         2.26 o
  -1   0   6        549.49        572.30        10.51 o
   0   0   6         63.78         66.82         1.14 o
   1   0   6        457.95        425.69        17.49 o
   2   0   6        613.83        581.32         9.21 o
   3   0   6        144.17        164.53         3.76 o
   4   0   6         91.14         89.74         1.93 o
   5   0   6         92.56         87.20         1.79 o
  -5   1   6         18.05         16.66         0.68 o
  -4   1   6         69.41         67.25         1.33 o
  -3   1   6        104.96        111.95         1.40 o
  -2   1   6          0.03          1.33         0.38 o
  -1   1   6         29.20         25.16         0.71 o
   0   1   6        632.09        611.61         9.54 o
   1   1   6         19.64         25.42         0.72 o
   2   1   6        244.00        242.77         2.74 o
   3   1   6          4.46          4.46         0.16 o
   4   1   6        127.41        129.97         1.55 o
   5   1   6        178.69        180.91         4.98 o
  -5   2   6         48.62         45.14         1.83 o
  -4   2   6        536.88        569.48         6.44 o
  -3   2   6          5.98          6.40         0.35 o
  -2   2   6         12.31         13.81         1.12 o
  -1   2   6        619.84        622.52         6.97 o
   0   2   6        373.56        378.69         6.69 o
   1   2   6        150.81        223.87         5.96 o
   2   2   6         99.21        123.09         1.43 o
   3   2   6         47.28         57.33         1.09 o
   4   2   6          2.10          3.49         0.33 o
   5   2   6          1.31          1.30         0.78 o
  -5   3   6         20.25         17.31         0.78 o
  -4   3   6         91.78         92.95         1.90 o
  -3   3   6          6.11          4.46         0.31 o
  -2   3   6         33.50         47.66         2.75 o
  -1   3   6          5.95          8.25         0.81 o
   0   3   6        293.32        369.78        12.09 o
   1   3   6        145.02        180.85         2.92 o
   2   3   6        276.85        299.22        10.38 o
   3   3   6        573.89        606.02        15.55 o
   4   3   6        345.92        369.79         6.13 o
   5   3   6        471.57        473.61         6.84 o
  -5   4   6         17.31         15.24         0.61 o
  -4   4   6          2.01          5.74         0.74 o
  -3   4   6         30.60         35.41         0.84 o
  -2   4   6         89.17         99.38         1.80 o
  -1   4   6          1.38         87.11         1.84 o
   0   4   6         52.58         55.88         0.81 o
   1   4   6        968.64        874.74        13.67 o
   2   4   6         11.62         10.28         0.36 o
   3   4   6         13.34         12.49         0.34 o
   4   4   6         52.03         53.56         1.37 o
  -4   5   6          9.50         11.87         0.49 o
  -3   5   6        107.65        105.36         1.50 o
  -2   5   6        221.04        207.96         2.65 o
  -1   5   6         38.42         40.35         1.26 o
   0   5   6        672.43        677.38        11.39 o
   1   5   6        180.91        173.91         2.84 o
   2   5   6         13.68         13.89         0.61 o
   3   5   6          0.28          1.60         0.29 o
   4   5   6        100.75        100.45         1.24 o
  -4   6   6        426.86        445.17         5.16 o
  -3   6   6         74.04         74.66         1.57 o
  -2   6   6        139.31        120.68         1.53 o
  -1   6   6          0.40         48.48         2.34 o
   0   6   6        141.53        158.92         2.00 o
   1   6   6        599.85        579.95         6.47 o
   2   6   6          5.29          8.62         0.21 o
   3   6   6          1.43          1.40         0.28 o
   4   6   6         17.20         17.09         0.44 o
  -4   7   6         20.09         18.30         0.47 o
  -3   7   6         19.85         24.80         1.18 o
  -2   7   6         87.66        130.75         2.76 o
  -1   7   6         19.43         43.71         1.60 o
   0   7   6         29.43         33.34         0.82 o
   1   7   6        356.29        351.55         3.98 o
   2   7   6         45.80         38.36         0.77 o
   3   7   6         58.44         53.88         0.96 o
   4   7   6         39.02         41.76         1.63 o
  -4   8   6         61.24         63.35         1.37 o
  -3   8   6         16.84         15.44         0.44 o
  -2   8   6          0.18          1.35         0.33 o
  -1   8   6        174.91        169.22         5.95 o
   0   8   6          0.69          0.27         0.12 o
   1   8   6         43.41         69.46         2.55 o
   2   8   6         99.85        111.21         2.53 o
   3   8   6         70.73         69.91         0.93 o
   4   8   6        139.34        134.24         1.84 o
  -4   9   6         37.87         37.79         0.69 o
  -3   9   6         82.26         76.33         1.02 o
  -2   9   6         56.79         93.82         1.86 o
  -1   9   6        146.39        135.80         1.95 o
   0   9   6         54.83         43.21         0.61 o
   1   9   6         25.69         24.44         0.74 o
   2   9   6        883.54        787.89         8.78 o
   3   9   6        197.51        188.97         2.25 o
   4   9   6        296.66        304.31         4.64 o
  -4  10   6         51.53         40.59         1.41 o
  -3  10   6         34.28         31.67         1.22 o
  -2  10   6          1.14          2.12         0.33 o
  -1  10   6          0.76         11.77         0.94 o
   0  10   6          5.19          3.54         0.27 o
   1  10   6        282.84        279.79         3.53 o
   2  10   6         87.66         78.90         1.03 o
   3  10   6         49.37         47.38         0.73 o
   4  10   6        100.80         91.72         1.44 o
  -4  11   6          1.44          1.17         0.84 o
  -3  11   6          3.65          3.20         0.28 o
  -2  11   6          3.48          4.72         0.35 o
  -1  11   6        121.81        124.79         2.24 o
   0  11   6        554.10        516.32         5.83 o
   1  11   6         12.45         16.98         1.21 o
   2  11   6        195.24        191.70         2.31 o
   3  11   6         73.12         73.29         1.48 o
   4  11   6         45.08         41.44         1.01 o
  -3  12   6         86.46         81.22         1.66 o
  -2  12   6         10.74          8.93         0.41 o
  -1  12   6         70.08         56.83         0.85 o
   0  12   6         42.12         48.53         0.96 o
   1  12   6         81.34         89.88         1.23 o
   2  12   6        166.29        135.78         1.68 o
   3  12   6          0.48          0.23         0.31 o
   4  12   6          0.02          0.31         0.67 o
  -3  13   6        142.93        141.44         1.85 o
  -2  13   6          1.78          0.89         0.30 o
  -1  13   6         74.96         77.44         1.08 o
   0  13   6        464.85        422.67         5.37 o
   1  13   6         30.08         23.05         0.49 o
   2  13   6         82.80         68.06         1.96 o
   3  13   6          5.31          2.48         0.65 o
  -3  14   6         15.39         18.10         0.75 o
  -2  14   6        225.06        222.51         2.68 o
  -1  14   6          3.24          2.34         0.24 o
   0  14   6         37.47         35.52         1.49 o
   1  14   6          1.36          0.19         0.21 o
   2  14   6         60.53         51.86         1.93 o
   3  14   6          0.01          0.60         0.61 o
  -3  15   6         50.16         40.56         0.88 o
  -2  15   6         20.30         18.79         0.69 o
  -1  15   6          8.29          7.62         0.43 o
   0  15   6         66.89         62.59         1.93 o
   1  15   6          0.06          1.83         0.84 o
   2  15   6          1.14          0.78         0.45 o
   3  15   6        218.93        223.27         3.29 o
  -3  16   6         29.44         24.61         0.92 o
  -2  16   6        116.14        119.86         2.70 o
  -1  16   6          3.25          4.58         0.89 o
   0  16   6          3.21          1.77         0.32 o
   1  16   6         38.53         59.85         1.54 o
   2  16   6          1.10          2.33         1.55 o
   3  16   6         14.61         12.37         0.79 o
  -2  17   6         50.48         52.37         2.01 o
  -1  17   6         43.38         45.24         1.54 o
   0  17   6         85.65         94.45         1.53 o
   1  17   6          2.99          5.24         0.45 o
   2  17   6          3.37          3.94         0.65 o
  -2  18   6         34.61         23.62         1.04 o
  -1  18   6          3.12          6.92         0.69 o
   0  18   6         16.56         19.06         0.82 o
   1  18   6        137.59        141.35         2.02 o
   2  18   6          9.65          7.88         0.71 o
  -1  19   6         28.99         29.65         0.97 o
   0  19   6        105.45        131.55         1.74 o
   1  19   6          0.39          1.16         0.76 o
   0  20   6         47.12         56.46         1.21 o
  -5   0   7          3.13          2.41         0.50 o
  -4   0   7         91.98         98.60         1.71 o
  -3   0   7         39.40         36.19         1.08 o
  -2   0   7          0.94          3.88         0.39 o
  -1   0   7       1932.51       1924.43        59.42 o
   0   0   7       1321.55       1099.73        28.13 o
   1   0   7       2508.51       1736.12        73.08 o
   2   0   7        120.14        116.52         1.99 o
   3   0   7         62.95         56.08         1.01 o
   4   0   7        630.88        666.33        12.99 o
  -5   1   7        218.18        221.86         3.00 o
  -4   1   7          9.96         12.29         0.95 o
  -3   1   7          1.87          2.87         0.70 o
  -2   1   7        249.20        253.50         2.96 o
  -1   1   7         55.82        138.33         3.56 o
   0   1   7         96.44        104.78         1.24 o
   1   1   7         31.97        154.83         4.35 o
   2   1   7          0.90          1.19         0.66 o
   3   1   7         54.11         54.22         0.91 o
   4   1   7          0.00          0.56         0.23 o
  -5   2   7         17.09         16.10         1.43 o
  -4   2   7        196.63        206.88         2.38 o
  -3   2   7          2.63          3.58         0.21 o
  -2   2   7          5.34         12.65         0.36 o
  -1   2   7        145.89        160.43         2.21 o
   0   2   7         39.02         55.31         0.82 o
   1   2   7        144.44        177.20         2.89 o
   2   2   7        136.46        131.99         1.54 o
   3   2   7        144.99        142.61         1.86 o
   4   2   7        973.05       1002.61        11.24 o
  -4   3   7          4.85          5.23         0.28 o
  -3   3   7          1.49          0.83         0.20 o
  -2   3   7        205.56        200.25         2.39 o
  -1   3   7         76.44         83.96         1.39 o
   0   3   7        301.21        307.78         3.53 o
   1   3   7         35.63         51.66         1.02 o
   2   3   7         11.28          7.48         0.62 o
   3   3   7         36.90         32.56         0.96 o
   4   3   7         19.37         20.91         0.81 o
  -4   4   7          9.37          9.64         0.31 o
  -3   4   7         16.60         16.78         0.34 o
  -2   4   7         27.05         37.69         0.74 o
  -1   4   7        679.14        714.14         7.99 o
   0   4   7         14.86         24.67         0.64 o
   1   4   7         57.98        119.65         4.19 o
   2   4   7         41.15         48.89         1.30 o
   3   4   7        104.01        105.76         1.29 o
   4   4   7         62.81         58.03         1.79 o
  -4   5   7         21.59         23.76         0.65 o
  -3   5   7         12.23          9.77         0.27 o
  -2   5   7          5.64          4.57         0.36 o
  -1   5   7         25.71         15.11         0.28 o
   0   5   7        903.31        879.65        20.50 o
   1   5   7          3.18          0.90         0.13 o
   2   5   7         56.51         62.72         1.35 o
   3   5   7        123.16        112.47         1.35 o
   4   5   7         10.18         10.10         0.38 o
  -4   6   7         19.79         21.72         0.56 o
  -3   6   7         39.53         36.22         0.56 o
  -2   6   7         58.87         57.92         3.15 o
  -1   6   7        145.92        179.44         4.09 o
   0   6   7         60.81         71.01         1.41 o
   1   6   7         55.91         75.81         1.58 o
   2   6   7        423.09        393.23         6.72 o
   3   6   7         70.90        136.28         6.72 o
   4   6   7        392.47        399.27         4.81 o
  -4   7   7          0.15          0.23         0.45 o
  -3   7   7         10.96          9.53         0.33 o
  -2   7   7         12.84         14.07         1.19 o
  -1   7   7         18.21         17.40         0.88 o
   0   7   7        283.57        339.01         4.63 o
   1   7   7         33.18         31.49         0.93 o
   2   7   7         85.13         86.66         2.61 o
   3   7   7        121.38        116.29         2.13 o
   4   7   7         14.61         13.48         0.77 o
  -4   8   7          4.19          3.93         0.38 o
  -3   8   7         10.95         10.64         0.29 o
  -2   8   7         22.95         22.99         0.72 o
  -1   8   7          3.19         10.85         0.90 o
   0   8   7          2.96          1.52         0.12 o
   1   8   7        322.57        289.07         3.36 o
   2   8   7         84.72         83.43         1.66 o
   3   8   7         35.85         31.79         0.75 o
   4   8   7         27.77         23.16         0.80 o
  -4   9   7         11.44          9.89         0.49 o
  -3   9   7         24.82         21.20         0.71 o
  -2   9   7        140.74        194.20         3.92 o
  -1   9   7         15.37         18.95         0.55 o
   0   9   7         32.99         29.81         0.98 o
   1   9   7         78.92         71.21         0.93 o
   2   9   7         79.11         72.68         2.18 o
   3   9   7        182.64        162.73         1.94 o
   4   9   7         37.56         30.13         0.94 o
  -4  10   7          0.01          0.15         0.47 o
  -3  10   7          1.07          0.96         0.25 o
  -2  10   7          1.21          1.04         0.24 o
  -1  10   7        664.81        632.60         7.63 o
   0  10   7          0.94          1.02         0.15 o
   1  10   7        243.88        290.26         3.70 o
   2  10   7         47.72         45.84         1.00 o
   3  10   7        356.28        339.85         3.92 o
   4  10   7        238.52        235.74         3.78 o
  -4  11   7          7.65          4.79         0.65 o
  -3  11   7          3.38          2.38         0.27 o
  -2  11   7         71.32         58.75         0.79 o
  -1  11   7        164.26        131.91         2.21 o
   0  11   7       1147.47       1087.20        14.64 o
   1  11   7          5.06         14.59         1.04 o
   2  11   7         18.20         22.86         0.58 o
   3  11   7          7.22          6.44         0.67 o
   4  11   7          9.11          6.33         0.67 o
  -3  12   7         28.79         28.76         0.60 o
  -2  12   7          4.34          3.60         0.30 o
  -1  12   7       1084.66       1032.51        14.62 o
   0  12   7         53.66         29.10         0.59 o
   1  12   7        102.42        184.74         6.32 o
   2  12   7         25.59         21.49         1.00 o
   3  12   7          1.25          0.82         0.36 o
  -3  13   7         32.79         38.04         0.77 o
  -2  13   7         72.31         60.83         0.91 o
  -1  13   7          2.00          1.43         0.28 o
   0  13   7        212.61        199.32         2.32 o
   1  13   7         17.17         20.32         0.56 o
   2  13   7          2.60          3.23         0.31 o
   3  13   7         26.13         27.36         1.31 o
  -3  14   7          0.54          0.42         0.43 o
  -2  14   7          8.61          9.64         0.46 o
  -1  14   7        197.73        168.04         2.24 o
   0  14   7         17.17          9.52         0.33 o
   1  14   7        117.27        104.56         2.54 o
   2  14   7         13.10         15.56         0.64 o
   3  14   7          7.16          6.87         0.68 o
  -3  15   7         71.32         65.94         2.33 o
  -2  15   7         50.98         43.19         1.09 o
  -1  15   7          0.04         -0.18         0.22 o
   0  15   7          2.15          1.41         0.18 o
   1  15   7          0.42          0.49         0.30 o
   2  15   7          1.16          0.62         0.46 o
   3  15   7        138.07        146.65         2.57 o
  -3  16   7         36.20         23.48         0.85 o
  -2  16   7          1.77          0.79         0.44 o
  -1  16   7         64.05         59.00         1.70 o
   0  16   7         46.79         44.38         1.09 o
   1  16   7          5.60          8.56         0.56 o
   2  16   7         48.04         51.41         1.79 o
  -2  17   7         32.48         29.75         0.82 o
  -1  17   7          3.79          2.57         0.31 o
   0  17   7        123.04        134.01         2.49 o
   1  17   7          3.94          3.15         0.49 o
   2  17   7         30.01         28.46         0.78 o
  -2  18   7          4.35          2.57         1.23 o
  -1  18   7         87.73        101.22         2.82 o
   0  18   7          0.01          0.30         0.38 o
   1  18   7          0.24          7.31         1.26 o
   2  18   7        100.21        103.68         2.23 o
  -1  19   7          8.74          8.01         0.70 o
   0  19   7         31.41         36.46         1.57 o
   1  19   7         29.70         25.25         1.59 o
   0  20   7          7.63          5.94         1.09 o
  -4   0   8          6.24          4.27         0.50 o
  -3   0   8         31.87         32.91         0.81 o
  -2   0   8         13.44         19.71         0.89 o
  -1   0   8         60.69         51.82         1.29 o
   0   0   8         30.47         45.32         0.86 o
   1   0   8         42.92         48.89         1.37 o
   2   0   8        133.63        124.00         2.04 o
   3   0   8         12.74          9.81         0.30 o
   4   0   8          2.33          1.90         0.63 o
  -4   1   8        113.34        106.07         2.50 o
  -3   1   8         35.86         36.97         1.11 o
  -2   1   8        124.26        121.50         3.16 o
  -1   1   8         99.17        160.53         2.79 o
   0   1   8       2128.59       1703.86        44.57 o
   1   1   8        299.41        287.60         4.59 o
   2   1   8        144.93        163.26         3.08 o
   3   1   8        558.32        527.36         5.90 o
   4   1   8         58.21         97.16         1.76 o
  -4   2   8          7.41          7.10         0.58 o
  -3   2   8        161.57        162.50         2.30 o
  -2   2   8         58.67         65.30         0.87 o
  -1   2   8         91.89         94.09         1.16 o
   0   2   8        360.94        386.70         4.37 o
   1   2   8          0.01          1.19         0.45 o
   2   2   8          4.92          5.91         0.25 o
   3   2   8         57.32         55.66         0.75 o
   4   2   8         40.36         39.82         1.21 o
  -4   3   8         35.38         34.59         0.70 o
  -3   3   8         47.67         46.63         0.78 o
  -2   3   8         11.42         12.73         0.26 o
  -1   3   8          2.49          3.10         0.21 o
   0   3   8          1.08          3.44         0.11 o
   1   3   8         67.43         67.97         1.64 o
   2   3   8          7.90          8.24         0.48 o
   3   3   8         70.59         75.21         1.71 o
   4   3   8         10.36          9.48         0.50 o
  -4   4   8         29.04         26.75         0.62 o
  -3   4   8         40.96         40.50         0.66 o
  -2   4   8         14.38         22.62         0.64 o
  -1   4   8        498.29        517.60        14.38 o
   0   4   8        119.41        148.99         2.48 o
   1   4   8         48.24        113.66         2.33 o
   2   4   8         76.02         67.67         1.54 o
   3   4   8          1.21          1.85         0.25 o
   4   4   8         12.57         14.72         0.67 o
  -4   5   8         32.58         29.65         1.37 o
  -3   5   8        181.88        166.64         1.92 o
  -2   5   8          4.37          2.61         0.20 o
  -1   5   8        370.98        335.49         3.86 o
   0   5   8          0.01          0.38         0.12 o
   1   5   8         87.68        100.08         2.16 o
   2   5   8          1.73          1.51         0.21 o
   3   5   8        362.18        353.48         4.49 o
   4   5   8         52.75         45.97         1.39 o
  -4   6   8         14.80         14.99         0.57 o
  -3   6   8         80.42         77.33         1.06 o
  -2   6   8         54.21         60.64         1.66 o
  -1   6   8        188.45        197.63         2.37 o
   0   6   8        657.62        641.72         7.20 o
   1   6   8        185.41        170.44         2.77 o
   2   6   8         50.61         50.80         1.03 o
   3   6   8        173.22        157.31         2.47 o
   4   6   8         15.91         13.08         0.71 o
  -4   7   8         83.51         83.58         1.61 o
  -3   7   8        339.09        332.39         3.82 o
  -2   7   8        181.55        172.28         2.46 o
  -1   7   8        186.98        182.80         4.04 o
   0   7   8         75.45         85.68         1.20 o
   1   7   8        301.44        283.47         3.70 o
   2   7   8          0.01          0.77         0.37 o
   3   7   8        466.25        424.21         4.98 o
   4   7   8         11.05          9.87         0.80 o
  -4   8   8          2.09          3.41         0.86 o
  -3   8   8         33.46         30.21         0.57 o
  -2   8   8         15.50         14.48         0.43 o
  -1   8   8         70.61         71.83         0.95 o
   0   8   8         84.96         76.80         1.64 o
   1   8   8         63.52         56.32         1.14 o
   2   8   8         29.10         17.32         0.49 o
   3   8   8         18.61         16.48         0.70 o
   4   8   8          0.57         -0.50         0.50 o
  -4   9   8          0.45          0.70         0.51 o
  -3   9   8          7.09          5.20         0.42 o
  -2   9   8          7.19         13.02         0.99 o
  -1   9   8        230.37        221.45         3.82 o
   0   9   8        192.56        219.23         6.29 o
   1   9   8        235.24        231.79         4.73 o
   2   9   8          0.01          7.89         0.49 o
   3   9   8         68.05         62.52         1.29 o
   4   9   8          9.37          8.53         0.74 o
  -4  10   8          1.23          1.41         0.44 o
  -3  10   8          2.55          2.68         0.26 o
  -2  10   8         18.59         18.14         0.41 o
  -1  10   8        196.41        162.16         2.07 o
   0  10   8        153.28        147.47         2.14 o
   1  10   8         28.17         23.81         1.00 o
   2  10   8         38.87         35.91         0.63 o
   3  10   8          0.38          0.37         0.40 o
   4  10   8          0.25         -0.14         0.91 o
  -3  11   8         16.63         19.10         0.66 o
  -2  11   8        566.81        544.33         6.05 o
  -1  11   8          4.52         11.81         1.00 o
   0  11   8        105.56         79.66         0.99 o
   1  11   8        315.21        254.65         3.25 o
   2  11   8         22.70         20.45         1.40 o
   3  11   8         14.22         12.91         1.01 o
   4  11   8         29.71         21.92         1.16 o
  -3  12   8         73.74         75.96         1.88 o
  -2  12   8         88.97         77.58         1.04 o
  -1  12   8        726.25        642.14         7.37 o
   0  12   8          0.05          0.21         0.16 o
   1  12   8         48.41         86.22         2.09 o
   2  12   8          0.00          0.66         0.32 o
   3  12   8         48.98         49.21         2.40 o
  -3  13   8         32.28         37.09         0.67 o
  -2  13   8        116.52        101.00         1.69 o
  -1  13   8          6.75         11.56         0.50 o
   0  13   8        286.14        239.37         2.85 o
   1  13   8        145.86        117.61         1.60 o
   2  13   8        125.01        123.55         2.19 o
   3  13   8          0.96          0.87         0.64 o
  -3  14   8        123.47        122.39         2.88 o
  -2  14   8          3.58          2.20         0.30 o
  -1  14   8         72.17         67.00         2.00 o
   0  14   8          0.36          0.57         0.22 o
   1  14   8          1.15          3.91         0.54 o
   2  14   8        114.22        119.46         1.60 o
   3  14   8          0.43          1.63         1.16 o
  -3  15   8          7.80          6.65         0.63 o
  -2  15   8          1.43          1.80         0.27 o
  -1  15   8         33.35         31.13         1.64 o
   0  15   8          0.30          0.77         0.26 o
   1  15   8         99.34        102.29         1.77 o
   2  15   8          6.29          5.67         0.41 o
   3  15   8         11.22          8.20         1.25 o
  -2  16   8          0.73         -0.46         0.46 o
  -1  16   8          0.27          0.34         0.34 o
   0  16   8         44.15         46.27         1.41 o
   1  16   8          7.57          4.23         0.34 o
   2  16   8        163.52        161.99         2.20 o
  -2  17   8          0.02          0.05         0.55 o
  -1  17   8          4.38          6.57         0.55 o
   0  17   8          1.74          0.75         0.49 o
   1  17   8          1.25          1.20         0.36 o
   2  17   8          2.24          4.14         1.08 o
  -1  18   8         97.39         94.78         2.73 o
   0  18   8         91.63        111.28         2.34 o
   1  18   8         48.49         59.41         1.97 o
  -1  19   8        128.85        146.43         5.48 o
   0  19   8         40.96         41.04         1.96 o
   1  19   8        200.31        220.41         6.52 o
  -4   0   9        163.23        176.54         2.95 o
  -3   0   9        104.13        111.29         1.94 o
  -2   0   9        338.78        336.20         5.52 o
  -1   0   9        152.04        168.02         3.00 o
   0   0   9          9.94         15.94         0.43 o
   1   0   9        263.25        276.02         4.38 o
   2   0   9        174.99        171.13         4.45 o
   3   0   9        608.41        570.06        11.79 o
   4   0   9         84.15         80.51         1.97 o
  -4   1   9         13.65         14.86         0.39 o
  -3   1   9          2.28          1.66         0.19 o
  -2   1   9        137.82        161.54         2.07 o
  -1   1   9        141.60        148.06         1.76 o
   0   1   9          1.82          3.07         0.12 o
   1   1   9         20.90         33.18         1.05 o
   2   1   9        413.46        401.26         6.31 o
   3   1   9        112.48        108.46         1.42 o
   4   1   9         49.40         47.95         1.20 o
  -4   2   9         13.91         14.78         0.86 o
  -3   2   9         18.42         20.00         0.63 o
  -2   2   9          1.46          1.19         0.34 o
  -1   2   9        147.71        139.73         3.80 o
   0   2   9        111.31        128.29         2.17 o
   1   2   9          2.54         23.73         1.74 o
   2   2   9         83.74        149.95         2.78 o
   3   2   9        370.41        359.65         4.36 o
   4   2   9          1.38          2.12         0.50 o
  -4   3   9         10.21         10.00         0.40 o
  -3   3   9         20.66         21.76         0.61 o
  -2   3   9         33.26         32.96         1.17 o
  -1   3   9        107.56        121.46         1.50 o
   0   3   9        126.49        129.79         2.32 o
   1   3   9         93.13         88.55         1.98 o
   2   3   9         87.94         87.77         1.61 o
   3   3   9        105.15        105.64         2.81 o
   4   3   9          4.37          6.20         0.42 o
  -4   4   9         49.19         42.89         1.40 o
  -3   4   9          0.57         -0.03         0.23 o
  -2   4   9         94.23         94.23         1.34 o
  -1   4   9          7.10          4.29         0.17 o
   0   4   9         34.20         42.73         0.77 o
   1   4   9          0.37          0.01         0.20 o
   2   4   9        270.06        260.34         6.05 o
   3   4   9        186.72        188.40         3.10 o
   4   4   9        132.04        124.54         4.37 o
  -4   5   9          0.64          8.23         0.71 o
  -3   5   9        214.36        224.77         3.12 o
  -2   5   9        752.16        777.29         9.55 o
  -1   5   9          1.74         10.24         1.17 o
   0   5   9         10.26         12.11         0.29 o
   1   5   9        296.16        262.21         5.69 o
   2   5   9        799.70        729.76        11.48 o
   3   5   9         97.65        101.03         1.75 o
   4   5   9          3.90          1.80         0.45 o
  -4   6   9        145.47        155.82         2.29 o
  -3   6   9        148.94        146.66         1.91 o
  -2   6   9        597.32        600.17         6.96 o
  -1   6   9         61.26         75.36         1.51 o
   0   6   9        249.75        255.68         2.94 o
   1   6   9         65.70         77.60         2.48 o
   2   6   9        232.87        217.57         5.60 o
   3   6   9         49.15         43.57         0.99 o
   4   6   9         21.85         17.86         1.55 o
  -4   7   9         23.48         22.29         0.80 o
  -3   7   9        107.47        104.59         2.05 o
  -2   7   9        252.82        339.31        10.68 o
  -1   7   9          8.99         94.29         2.99 o
   0   7   9        152.27        166.97         1.99 o
   1   7   9        906.10        860.00        10.14 o
   2   7   9       1275.69       1221.18        19.18 o
   3   7   9        173.99        158.09         4.06 o
   4   7   9          7.67          7.93         1.19 o
  -4   8   9         69.13         62.49         2.17 o
  -3   8   9         54.39         57.01         2.98 o
  -2   8   9         13.40         16.15         1.86 o
  -1   8   9        159.26        156.26         2.15 o
   0   8   9         56.28         48.26         0.71 o
   1   8   9         90.64         96.38         1.43 o
   2   8   9        284.14        262.51         4.42 o
   3   8   9          1.15          2.21         0.39 o
   4   8   9         68.42         58.03         8.83 o
  -4   9   9         19.08         14.75         1.20 o
  -3   9   9         16.52         15.77         0.39 o
  -2   9   9          0.06         -0.14         0.19 o
  -1   9   9        394.45        353.28         4.08 o
   0   9   9        242.34        240.86         2.85 o
   1   9   9        114.67        126.15         1.59 o
   2   9   9          7.77          9.42         0.41 o
   3   9   9         24.05         21.21         1.99 o
   4   9   9         14.88         12.50         0.80 o
  -3  10   9         40.37         45.13         1.37 o
  -2  10   9        339.07        299.13         4.67 o
  -1  10   9         35.08         28.74         0.65 o
   0  10   9        126.06        134.84         1.69 o
   1  10   9          5.88          4.93         0.25 o
   2  10   9        159.01        136.96         2.03 o
   3  10   9         62.50         65.78         1.43 o
   4  10   9         25.61         22.43         1.73 o
  -3  11   9         24.75         22.31         1.06 o
  -2  11   9        277.38        264.47         3.84 o
  -1  11   9         73.58         78.52         1.33 o
   0  11   9          5.08          5.15         0.29 o
   1  11   9         15.30         16.35         0.49 o
   2  11   9          9.38          7.45         0.77 o
   3  11   9         21.00         20.66         0.71 o
  -3  12   9         21.80         25.05         0.78 o
  -2  12   9        200.61        190.11         3.72 o
  -1  12   9         72.28         63.36         1.29 o
   0  12   9        140.02        129.15         2.05 o
   1  12   9        108.39        107.50         4.32 o
   2  12   9          5.67         12.52         1.33 o
   3  12   9          1.26          0.95         0.54 o
  -3  13   9         17.71         16.29         0.99 o
  -2  13   9        215.67        199.36         2.73 o
  -1  13   9          9.41         14.18         0.40 o
   0  13   9          2.00          0.90         0.17 o
   1  13   9         46.11         53.29         0.97 o
   2  13   9          0.08          0.37         0.40 o
   3  13   9          2.35          1.10         0.60 o
  -3  14   9         12.56         10.03         0.50 o
  -2  14   9        153.01        142.25         3.12 o
  -1  14   9          1.40          1.44         0.35 o
   0  14   9         23.62         18.31         1.00 o
   1  14   9         30.04         34.65         0.94 o
   2  14   9          0.71         -0.05         0.63 o
   3  14   9          1.23          1.11         0.68 o
  -3  15   9         11.56          7.11         0.61 o
  -2  15   9          5.98          8.10         0.47 o
  -1  15   9         15.34         16.49         0.87 o
   0  15   9          0.08          0.22         0.21 o
   1  15   9         50.76         52.80         1.18 o
   2  15   9          0.34          0.48         0.50 o
  -2  16   9         18.32         16.79         1.28 o
  -1  16   9          3.95          4.22         0.71 o
   0  16   9         50.62         54.24         1.14 o
   1  16   9          1.66          1.03         0.50 o
   2  16   9          7.42          9.36         0.90 o
  -2  17   9        176.26        159.02         3.12 o
  -1  17   9          0.11          0.53         0.63 o
   0  17   9          3.44          2.10         0.38 o
   1  17   9         17.91         19.55         1.79 o
   2  17   9         65.50         58.20         1.66 o
  -1  18   9         14.75         15.95         1.53 o
   0  18   9         40.34         42.19         0.88 o
   1  18   9          6.35          6.94         0.81 o
   0  19   9         63.05         69.95         1.76 o
  -4   0  10          7.92          9.83         2.16 o
  -3   0  10        198.68        190.18         3.25 o
  -2   0  10        162.29        179.68         3.06 o
  -1   0  10         23.27        118.67         2.69 o
   0   0  10          6.66          4.49         0.20 o
   1   0  10        855.34        767.72        11.84 o
   2   0  10        154.74        151.62         4.28 o
   3   0  10         41.08         38.54         0.75 o
  -4   1  10         52.40         49.28         1.20 o
  -3   1  10        167.02        160.71         1.91 o
  -2   1  10          3.40          5.65         0.89 o
  -1   1  10        497.78        505.93         5.75 o
   0   1  10         11.77         12.25         0.37 o
   1   1  10        342.95        358.69         7.07 o
   2   1  10        433.06        391.72        11.40 o
   3   1  10        265.20        264.54         3.83 o
  -4   2  10         79.88         77.86         3.63 o
  -3   2  10          4.85          3.27         0.37 o
  -2   2  10         24.99         34.61         0.54 o
  -1   2  10          3.23          4.43         0.21 o
   0   2  10         49.62         44.39         0.59 o
   1   2  10         38.32         41.67         1.97 o
   2   2  10         26.08         38.86         0.93 o
   3   2  10          9.72         28.83         1.16 o
   4   2  10         10.67         13.33         1.10 o
  -4   3  10          0.78          0.62         0.88 o
  -3   3  10         71.70         68.47         1.21 o
  -2   3  10         40.12         31.56         0.60 o
  -1   3  10         72.71         91.01         1.15 o
   0   3  10          2.44          2.94         0.12 o
   1   3  10         10.19         10.47         0.88 o
   2   3  10        234.76        207.46         3.44 o
   3   3  10         48.06         47.33         1.03 o
   4   3  10        151.50        140.25         2.98 o
  -4   4  10          6.85          5.50         0.58 o
  -3   4  10        119.74        119.31         1.48 o
  -2   4  10         36.17         38.95         0.60 o
  -1   4  10        797.84        749.09         8.38 o
   0   4  10        136.78        137.67         1.66 o
   1   4  10         23.38         84.97         7.63 o
   2   4  10          8.51          8.52         0.46 o
   3   4  10         25.19         26.58         0.75 o
   4   4  10          0.09          0.36         1.29 o
  -4   5  10          0.85          4.57         1.04 o
  -3   5  10         50.91         55.71         2.45 o
  -2   5  10        175.89        180.65         2.63 o
  -1   5  10        413.84        426.45         8.98 o
   0   5  10        556.94        644.32        12.18 o
   1   5  10         56.80        117.80         7.43 o
   2   5  10          7.01          3.31         0.59 o
   3   5  10        228.53        250.63         9.55 o
   4   5  10         51.70         39.69         1.81 o
  -4   6  10          0.19          0.26         0.38 o
  -3   6  10         68.22         66.77         1.00 o
  -2   6  10          4.21          3.98         0.90 o
  -1   6  10         88.04        224.88         3.27 o
   0   6  10        399.84        414.03         4.70 o
   1   6  10       1685.74       1405.84        34.40 o
   2   6  10        699.24        643.11        10.09 o
   3   6  10        168.55        173.57         3.39 o
   4   6  10          0.03          0.90         0.62 o
  -4   7  10         61.86         59.28         1.45 o
  -3   7  10        101.87        101.13         1.60 o
  -2   7  10         13.84         18.79         0.63 o
  -1   7  10         19.42         24.32         0.50 o
   0   7  10        938.42        948.34        11.30 o
   1   7  10         10.52         15.22         0.77 o
   2   7  10        490.82        425.14         8.87 o
   3   7  10         15.71         14.50         0.69 o
  -4   8  10         17.20         18.80         1.54 o
  -3   8  10          8.43          6.34         0.38 o
  -2   8  10        105.91        101.00         2.47 o
  -1   8  10         13.65         21.78         1.49 o
   0   8  10        139.42        142.90         2.00 o
   1   8  10        382.50        313.53         3.54 o
   2   8  10         74.26         72.04         1.31 o
   3   8  10          3.65          5.50         0.74 o
   4   8  10          6.04          7.08         0.99 o
  -4   9  10          2.77          1.37         0.71 o
  -3   9  10        115.70        113.86         1.70 o
  -2   9  10         33.69         27.86         0.96 o
  -1   9  10          0.22          1.20         0.21 o
   0   9  10        310.41        315.23         3.64 o
   1   9  10         33.98         32.10         0.58 o
   2   9  10          0.49          3.69         0.35 o
   3   9  10        196.45        191.51         3.19 o
  -3  10  10          0.08          2.48         0.92 o
  -2  10  10        335.12        341.19         4.00 o
  -1  10  10          1.99          2.10         0.19 o
   0  10  10          0.55          0.16         0.21 o
   1  10  10         21.83         17.69         0.51 o
   2  10  10        101.07         99.26         2.89 o
   3  10  10         77.89         71.73         1.39 o
  -3  11  10        200.98        192.72         2.37 o
  -2  11  10         51.30         57.83         1.54 o
  -1  11  10         99.80        110.13         1.40 o
   0  11  10          0.02          0.20         0.16 o
   1  11  10          0.44          1.75         0.25 o
   2  11  10          5.20          4.44         0.48 o
   3  11  10         12.39         11.28         0.97 o
  -3  12  10         55.79         45.76         1.55 o
  -2  12  10         53.72         55.96         1.21 o
  -1  12  10         99.27         88.47         1.16 o
   0  12  10         16.37         11.60         0.28 o
   1  12  10          0.06          1.90         0.35 o
   2  12  10         55.99         49.32         1.23 o
   3  12  10         82.53         79.58         1.66 o
  -3  13  10        401.36        417.81         4.83 o
  -2  13  10         13.87         12.96         0.49 o
  -1  13  10         59.72         58.64         1.67 o
   0  13  10          0.00         -0.18         0.18 o
   1  13  10         19.95         18.43         0.67 o
   2  13  10          8.69          9.36         0.51 o
   3  13  10         27.12         24.98         0.89 o
  -3  14  10         28.59         25.99         0.99 o
  -2  14  10          5.86          4.33         0.52 o
  -1  14  10          0.02         -0.21         0.32 o
   0  14  10         14.33         12.83         0.55 o
   1  14  10          7.55         11.14         0.45 o
   2  14  10         16.25         15.56         0.75 o
   3  14  10         27.89         33.09         4.47 o
  -2  15  10         18.85         17.84         1.21 o
  -1  15  10         18.75         17.27         0.54 o
   0  15  10         26.98         26.44         1.57 o
   1  15  10          3.90          5.95         0.49 o
   2  15  10          0.32          0.20         0.59 o
  -2  16  10         28.24         17.77         1.21 o
  -1  16  10         99.95        104.06         2.71 o
   0  16  10          8.74         11.77         0.63 o
   1  16  10         80.45         78.20         2.28 o
   2  16  10         11.55          8.20         0.89 o
  -1  17  10        102.84        105.74         1.82 o
   0  17  10         33.17         38.76         1.05 o
   1  17  10         18.80         21.61         0.88 o
  -1  18  10         94.25         82.25         3.87 o
   0  18  10          1.59          2.11         1.87 o
   1  18  10         46.83         49.19         2.02 o
  -4   0  11        150.49        161.93         4.17 o
  -3   0  11         87.58         83.99         1.61 o
  -2   0  11        748.71        723.33        11.64 o
  -1   0  11         76.72         62.72         1.33 o
   0   0  11        457.08        482.29         7.72 o
   1   0  11        212.90        206.01         3.66 o
   3   0  11         44.83         46.08         1.71 o
   4   0  11         94.73         94.82         3.28 o
  -4   1  11         14.86         15.95         0.96 o
  -3   1  11         18.19         16.25         0.35 o
  -2   1  11          8.00          5.24         0.26 o
  -1   1  11         48.48         49.24         0.83 o
   0   1  11         66.77         68.22         1.19 o
   1   1  11         62.10         49.98         0.72 o
   2   1  11        199.07        162.95         2.65 o
   3   1  11          5.92          4.45         0.40 o
   4   1  11          1.51          1.36         0.68 o
  -4   2  11          0.03          0.49         0.44 o
  -3   2  11         41.00         42.86         0.88 o
  -2   2  11          0.20          1.13         0.51 o
  -1   2  11        386.81        394.65         4.50 o
   0   2  11         54.84         50.34         1.70 o
   1   2  11        329.11        314.03         6.50 o
   2   2  11        301.16        289.06         5.48 o
   3   2  11          6.65          7.05         0.71 o
   4   2  11         52.39         49.62         2.09 o
  -4   3  11         30.22         24.89         1.07 o
  -3   3  11         60.47         64.48         2.60 o
  -2   3  11        514.80        555.02        19.66 o
  -1   3  11         57.18         62.85         1.21 o
   0   3  11          0.26          0.73         0.17 o
   1   3  11        105.70        252.54        12.03 o
   2   3  11        266.71        469.90         9.02 o
   3   3  11          6.66          6.67         1.29 o
   4   3  11         11.04         14.22         1.93 o
  -4   4  11         71.95         66.45         1.82 o
  -3   4  11         15.88         15.42         0.53 o
  -2   4  11        227.11        236.07         2.77 o
  -1   4  11        224.30        216.53         2.56 o
   0   4  11         81.93         90.87         1.42 o
   1   4  11         65.89         70.28         2.23 o
   2   4  11        147.00        135.69         2.38 o
   3   4  11        241.03        220.40         5.24 o
   4   4  11         57.54         51.35         2.14 o
[truncated: 43,936 more chars]
