# Supplementary material for: Synthesis of C70-fragment buckybowls bearing alkoxy substituents
Source: Beilstein J Org Chem. 2020 Apr 15;16:681–90. doi: 10.3762/bjoc.16.66 (PMC7176931; doi:10.3762/bjoc.16.66)
Supplement: File 1 — CIF files of compounds 5a–c. [file Beilstein_J_Org_Chem-16-681-s001.zip › Dioxole-5c-re.cif]

data_Dioxole5c
_audit_creation_date               2020-01-29
_audit_creation_method
;
Olex2 1.2
(compiled 2018.05.29 svn.r3508 for OlexSys, GUI svn.r5506)
;
_shelx_SHELXL_version_number       '2018/3'
_audit_contact_author_address      ?
_audit_contact_author_email        ?
_audit_contact_author_name         ''
_audit_contact_author_phone        ?
_publ_contact_author_id_orcid      ?
_publ_section_references
;
Dolomanov, O.V., Bourhis, L.J., Gildea, R.J, Howard, J.A.K. & Puschmann, H.
 (2009), J. Appl. Cryst. 42, 339-341.

Sheldrick, G.M. (2015). Acta Cryst. C71, 3-8.
;
_publ_section_exptl_refinement
;
Because of the materials's nature to give exclusively polycrystals in which 
very thin single crystal were stacked, we could not get much more reliable 
data though we tried various crystallization conditions and measurements 
including synchrotron X-ray. Here shows the best data so far 
we could obtained.
;
_chemical_name_common              ?
_chemical_name_systematic          ?
_chemical_formula_moiety           'C29 H14 O2'
_chemical_formula_sum              'C29 H14 O2'
_chemical_formula_weight           394.40
_chemical_melting_point            ?
loop_
  _atom_type_symbol
  _atom_type_description
  _atom_type_scat_dispersion_real
  _atom_type_scat_dispersion_imag
  _atom_type_scat_source
 'C' 'C' 0.0033 0.0016 'International Tables Vol C Tables 4.2.6.8 and 6.1.1.4'
 'H' 'H' 0.0000 0.0000 'International Tables Vol C Tables 4.2.6.8 and 6.1.1.4'
 'O' 'O' 0.0106 0.0060 'International Tables Vol C Tables 4.2.6.8 and 6.1.1.4'

_shelx_space_group_comment
;
The symmetry employed for this shelxl refinement is uniquely defined
by the following loop, which should always be used as a source of
symmetry information in preference to the above space-group names.
They are only intended as comments.
;
_space_group_crystal_system        'monoclinic'
_space_group_IT_number             14
_space_group_name_H-M_alt          'P 1 21/c 1'
_space_group_name_Hall             '-P 2ybc'
loop_
  _space_group_symop_operation_xyz
 'x, y, z'
 '-x, y+1/2, -z+1/2'
 '-x, -y, -z'
 'x, -y-1/2, z-1/2'

_cell_length_a                     17.274(4)
_cell_length_b                     7.4408(15)
_cell_length_c                     27.913(6)
_cell_angle_alpha                  90
_cell_angle_beta                   100.62(3)
_cell_angle_gamma                  90
_cell_volume                       3526.2(13)
_cell_formula_units_Z              8
_cell_measurement_reflns_used      3950
_cell_measurement_temperature      150(2
_cell_measurement_theta_max        27.37
_cell_measurement_theta_min        3.03
_shelx_estimated_absorpt_T_max     ?
_shelx_estimated_absorpt_T_min     ?
_exptl_absorpt_coefficient_mu      0.092
_exptl_absorpt_correction_T_max    0.9999
_exptl_absorpt_correction_T_min    0.5437
_exptl_absorpt_correction_type     multi-scan
_exptl_absorpt_process_details     
;
    Higashi, T. (1995). Program for Absorption Correction.
    Rigaku Corporation, Tokyo, Japan.
; 
_exptl_absorpt_special_details     ?
_exptl_crystal_colour              yellow
_exptl_crystal_density_diffrn      1.486
_exptl_crystal_density_meas        ?
_exptl_crystal_density_method      ?
_exptl_crystal_description         block
_exptl_crystal_F_000               1632
_exptl_crystal_size_max            0.18
_exptl_crystal_size_mid            0.03
_exptl_crystal_size_min            0.03
_exptl_transmission_factor_max     ?
_exptl_transmission_factor_min     ?
_diffrn_reflns_av_R_equivalents    0.1884
_diffrn_reflns_av_unetI/netI       0.3510
_diffrn_reflns_Laue_measured_fraction_full  0.991
_diffrn_reflns_Laue_measured_fraction_max  0.987
_diffrn_reflns_limit_h_max         22
_diffrn_reflns_limit_h_min         -22
_diffrn_reflns_limit_k_max         9
_diffrn_reflns_limit_k_min         -9
_diffrn_reflns_limit_l_max         34
_diffrn_reflns_limit_l_min         -35
_diffrn_reflns_number              19291
_diffrn_reflns_point_group_measured_fraction_full  0.991
_diffrn_reflns_point_group_measured_fraction_max  0.987
_diffrn_reflns_theta_full          26.000
_diffrn_reflns_theta_max           27.485
_diffrn_reflns_theta_min           3.026
_diffrn_ambient_temperature        150(2)
_diffrn_detector_area_resol_mean   ?
_diffrn_measured_fraction_theta_full  0.991
_diffrn_measured_fraction_theta_max  0.987
_diffrn_measurement_device_type    'Rigaku R-AXIS VII area detector'
_diffrn_measurement_method         '\w scans'
_diffrn_radiation_monochromator    'graphite'
_diffrn_radiation_type             MoK\a
_diffrn_radiation_wavelength       0.71073
_diffrn_source                     'fine-focus sealed tube'
_reflns_Friedel_coverage           0.000
_reflns_Friedel_fraction_full      .
_reflns_Friedel_fraction_max       .
_reflns_number_gt                  2351
_reflns_number_total               7995
_reflns_special_details
;
 Reflections were merged by SHELXL according to the crystal
 class for the calculation of statistics and refinement.
 
 _reflns_Friedel_fraction is defined as the number of unique
 Friedel pairs measured divided by the number that would be
 possible theoretically, ignoring centric projections and
 systematic absences.
;
_reflns_threshold_expression       'I > 2\s(I)'
_computing_cell_refinement         'PROCESS-AUTO'
_computing_data_collection         'PROCESS-AUTO'
_computing_data_reduction          'PROCESS-AUTO'
_computing_molecular_graphics      'Olex2 (Dolomanov et al., 2009)'
_computing_publication_material    'Olex2 (Dolomanov et al., 2009)'
_computing_structure_refinement    'ShelXL (Sheldrick, 2015)'
_computing_structure_solution      'XS (Sheldrick, 2008)'?
_refine_diff_density_max           0.214
_refine_diff_density_min           -0.253
_refine_diff_density_rms           0.052
_refine_ls_extinction_coef         .
_refine_ls_extinction_method       none
_refine_ls_goodness_of_fit_ref     1.000
_refine_ls_hydrogen_treatment      constr
_refine_ls_matrix_type             full
_refine_ls_number_parameters       559
_refine_ls_number_reflns           7995
_refine_ls_number_restraints       51
_refine_ls_R_factor_all            0.3593
_refine_ls_R_factor_gt             0.1217
_refine_ls_restrained_S_all        0.999
_refine_ls_shift/su_max            0.000
_refine_ls_shift/su_mean           0.000
_refine_ls_structure_factor_coef   Fsqd
_refine_ls_weighting_details      
 'w=1/[\s^2^(Fo^2^)+(0.0558P)^2^] where P=(Fo^2^+2Fc^2^)/3'
_refine_ls_weighting_scheme        calc
_refine_ls_wR_factor_gt            0.1498
_refine_ls_wR_factor_ref           0.2096
_refine_special_details            ?
_olex2_refinement_description
;
1. Fixed Uiso
 At 1.2 times of:
  All C(H) groups, All C(H,H) groups
2. Rigid bond restraints
 C23, C24, C25, C26, C27, C28
 with sigma for 1-2 distances of 0.01 and sigma for 1-3 distances of 0.01
3. Uiso/Uaniso restraints and constraints
C23 \\sim C24 \\sim C25 \\sim C26 \\sim C27 \\sim C28: within 1.7A with sigma
of 0.04 and sigma for terminal atoms of 0.08
4. Rigid body (RIGU) restrains
 C23, C24
 with sigma for 1-2 distances of 0.004 and sigma for 1-3 distances of 0.004
5.a Secondary CH2 refined with riding coordinates:
 C8(H8A,H8B), C13(H13A,H13B), C29(H29A,H29B), C37(H37A,H37B), C42(H42A,H42B),
 C58(H58A,H58B)
5.b Aromatic/amide H refined with riding coordinates:
 C10(H10), C11(H11), C15(H15), C16(H16), C18(H18), C22(H22), C25(H25),
 C26(H26), C39(H39), C40(H40), C44(H44), C45(H45), C47(H47), C51(H51), C54(H54),
  C55(H55)
;
_atom_sites_solution_hydrogens     geom
_atom_sites_solution_primary       ?
_atom_sites_solution_secondary     ?
loop_
  _atom_site_label
  _atom_site_type_symbol
  _atom_site_fract_x
  _atom_site_fract_y
  _atom_site_fract_z
  _atom_site_U_iso_or_equiv
  _atom_site_adp_type
  _atom_site_occupancy
  _atom_site_site_symmetry_order
  _atom_site_calc_flag
  _atom_site_refinement_flags_posn
  _atom_site_refinement_flags_adp
  _atom_site_refinement_flags_occupancy
  _atom_site_disorder_assembly
  _atom_site_disorder_group
 O1 O 0.3024(2) 0.0242(5) 0.36021(13) 0.0589(12) Uani 1 1 d . . . . .
 O2 O 0.2501(3) 0.1422(6) 0.42428(13) 0.0770(14) Uani 1 1 d . . . . .
 O3 O 0.5032(3) 0.0937(6) 0.11413(14) 0.0717(14) Uani 1 1 d . . . . .
 O4 O 0.5680(3) 0.1391(7) 0.05000(14) 0.0904(16) Uani 1 1 d . . . . .
 C1 C 0.1170(3) -0.0211(7) 0.17136(19) 0.0338(14) Uani 1 1 d . . . . .
 C2 C 0.0497(3) 0.0519(7) 0.1396(2) 0.0381(15) Uani 1 1 d . . . . .
 C3 C 0.0547(3) 0.0665(8) 0.0907(2) 0.0438(16) Uani 1 1 d . . . . .
 C4 C 0.1239(4) 0.0197(7) 0.0733(2) 0.0410(16) Uani 1 1 d . . . . .
 C5 C 0.1888(4) -0.0463(7) 0.1043(2) 0.0429(16) Uani 1 1 d . . . . .
 C6 C 0.1852(4) -0.0653(7) 0.1545(2) 0.0410(15) Uani 1 1 d . . . . .
 C7 C 0.2596(3) -0.0728(7) 0.1825(2) 0.0406(15) Uani 1 1 d . . . . .
 C8 C 0.3194(3) -0.0651(7) 0.14699(17) 0.0460(16) Uani 1 1 d . . . . .
 H8A H 0.347495 -0.177923 0.146870 0.055 Uiso 1 1 calc R . . . .
 H8B H 0.357097 0.031362 0.155689 0.055 Uiso 1 1 calc R . . . .
 C9 C 0.2654(4) -0.0293(7) 0.0967(2) 0.0512(17) Uani 1 1 d . . . . .
 C10 C 0.2720(4) 0.0384(8) 0.0518(2) 0.0570(18) Uani 1 1 d . . . . .
 H10 H 0.321277 0.042188 0.042904 0.068 Uiso 1 1 calc R . . . .
 C11 C 0.2049(4) 0.1031(8) 0.01833(19) 0.0530(17) Uani 1 1 d . . . . .
 H11 H 0.211766 0.146474 -0.011853 0.064 Uiso 1 1 calc R . . . .
 C12 C 0.1297(4) 0.1029(8) 0.0297(2) 0.0474(17) Uani 1 1 d . . . . .
 C13 C 0.0511(3) 0.2038(7) 0.01268(18) 0.0556(18) Uani 1 1 d . . . . .
 H13A H 0.020596 0.149558 -0.016374 0.067 Uiso 1 1 calc R . . . .
 H13B H 0.059964 0.329655 0.006380 0.067 Uiso 1 1 calc R . . . .
 C14 C 0.0098(4) 0.1804(9) 0.0573(2) 0.0590(19) Uani 1 1 d . . . . .
 C15 C -0.0513(3) 0.2646(8) 0.0741(2) 0.0619(19) Uani 1 1 d . . . . .
 H15 H -0.087284 0.332589 0.052621 0.074 Uiso 1 1 calc R . . . .
 C16 C -0.0603(3) 0.2496(8) 0.1231(2) 0.0505(17) Uani 1 1 d . . . . .
 H16 H -0.102948 0.306053 0.132776 0.061 Uiso 1 1 calc R . . . .
 C17 C -0.0069(3) 0.1521(8) 0.1583(2) 0.0453(16) Uani 1 1 d . . . . .
 C18 C 0.0022(3) 0.1685(7) 0.2108(2) 0.0473(16) Uani 1 1 d . . . . .
 H18 H -0.036548 0.225901 0.224322 0.057 Uiso 1 1 calc R . . . .
 C19 C 0.0664(3) 0.1012(7) 0.2402(2) 0.0406(15) Uani 1 1 d . . . . .
 C20 C 0.1255(3) 0.0112(7) 0.2203(2) 0.0389(15) Uani 1 1 d . . . . .
 C21 C 0.1986(4) -0.0078(7) 0.25184(19) 0.0442(16) Uani 1 1 d . . . . .
 C22 C 0.2676(3) -0.0463(7) 0.23378(18) 0.0430(15) Uani 1 1 d . . . . .
 H22 H 0.316378 -0.054162 0.254396 0.052 Uiso 1 1 calc R . . . .
 C23 C 0.1812(3) 0.0581(7) 0.29855(19) 0.0423(15) Uani 1 1 d . U . . .
 C24 C 0.1027(3) 0.1258(7) 0.2924(2) 0.0476(16) Uani 1 1 d . U . . .
 C25 C 0.0739(3) 0.2030(7) 0.3316(2) 0.0476(16) Uani 1 1 d . U . . .
 H25 H 0.022793 0.247725 0.326176 0.057 Uiso 1 1 calc R . . . .
 C26 C 0.1186(4) 0.2148(8) 0.3776(2) 0.0620(18) Uani 1 1 d . U . . .
 H26 H 0.099449 0.264266 0.403674 0.074 Uiso 1 1 calc R . . . .
 C27 C 0.1933(4) 0.1485(8) 0.3821(2) 0.0514(17) Uani 1 1 d . U . . .
 C28 C 0.2250(4) 0.0774(8) 0.3444(2) 0.0495(16) Uani 1 1 d . U . . .
 C29 C 0.3210(4) 0.0934(9) 0.4086(2) 0.076(2) Uani 1 1 d . . . . .
 H29A H 0.348759 0.003067 0.430234 0.091 Uiso 1 1 calc R . . . .
 H29B H 0.354882 0.197708 0.409325 0.091 Uiso 1 1 calc R . . . .
 C30 C 0.6725(3) -0.0914(7) 0.3018(2) 0.0430(16) Uani 1 1 d . . . . .
 C31 C 0.7473(4) -0.0874(7) 0.3330(2) 0.0446(16) Uani 1 1 d . . . . .
 C32 C 0.7477(3) -0.0642(7) 0.3829(2) 0.0433(16) Uani 1 1 d . . . . .
 C33 C 0.6766(4) -0.0460(7) 0.4013(2) 0.0444(16) Uani 1 1 d . . . . .
 C34 C 0.6062(3) -0.0472(7) 0.3702(2) 0.0388(15) Uani 1 1 d . . . . .
 C35 C 0.6025(3) -0.0694(7) 0.3194(2) 0.0448(16) Uani 1 1 d . . . . .
 C36 C 0.5325(3) -0.0042(8) 0.2926(2) 0.0427(16) Uani 1 1 d . . . . .
 C37 C 0.4809(3) 0.0562(8) 0.32967(17) 0.0533(18) Uani 1 1 d . . . . .
 H37A H 0.462797 0.178867 0.323582 0.064 Uiso 1 1 calc R . . . .
 H37B H 0.435702 -0.022142 0.328536 0.064 Uiso 1 1 calc R . . . .
 C38 C 0.5383(4) 0.0400(8) 0.3791(2) 0.0536(18) Uani 1 1 d . . . . .
 C39 C 0.5469(3) 0.1208(8) 0.4245(2) 0.0556(18) Uani 1 1 d . . . . .
 H39 H 0.503845 0.177256 0.433593 0.067 Uiso 1 1 calc R . . . .
 C40 C 0.6210(4) 0.1191(8) 0.4577(2) 0.0570(18) Uani 1 1 d . . . . .
 H40 H 0.624125 0.170443 0.488397 0.068 Uiso 1 1 calc R . . . .
 C41 C 0.6872(4) 0.0442(8) 0.4456(2) 0.0487(17) Uani 1 1 d . . . . .
 C42 C 0.7773(3) 0.0632(7) 0.46229(18) 0.0550(17) Uani 1 1 d . . . . .
 H42A H 0.796308 -0.013021 0.490173 0.066 Uiso 1 1 calc R . . . .
 H42B H 0.791871 0.186753 0.470644 0.066 Uiso 1 1 calc R . . . .
 C43 C 0.8102(4) 0.0012(8) 0.4170(2) 0.0512(17) Uani 1 1 d . . . . .
 C44 C 0.8793(4) 0.0283(8) 0.3997(2) 0.0629(19) Uani 1 1 d . . . . .
 H44 H 0.924344 0.064866 0.421106 0.075 Uiso 1 1 calc R . . . .
 C45 C 0.8822(4) 0.0012(7) 0.3506(3) 0.0602(19) Uani 1 1 d . . . . .
 H45 H 0.930296 0.016381 0.340575 0.072 Uiso 1 1 calc R . . . .
 C46 C 0.8165(4) -0.0476(8) 0.3154(2) 0.0553(18) Uani 1 1 d . . . . .
 C47 C 0.8090(4) -0.0259(7) 0.2632(3) 0.0621(19) Uani 1 1 d . . . . .
 H47 H 0.854432 -0.011655 0.250157 0.075 Uiso 1 1 calc R . . . .
 C48 C 0.7383(4) -0.0256(8) 0.2328(2) 0.0498(17) Uani 1 1 d . . . . .
 C49 C 0.6688(3) -0.0552(7) 0.2531(2) 0.0415(15) Uani 1 1 d . . . . .
 C50 C 0.5984(3) -0.0036(8) 0.2228(2) 0.0483(17) Uani 1 1 d . . . . .
 C51 C 0.5297(3) 0.0267(7) 0.24192(18) 0.0475(16) Uani 1 1 d . . . . .
 H51 H 0.483568 0.065963 0.222005 0.057 Uiso 1 1 calc R . . . .
 C52 C 0.6229(4) 0.0361(7) 0.1759(2) 0.0487(17) Uani 1 1 d . . . . .
 C53 C 0.7074(4) 0.0234(8) 0.1810(2) 0.0539(17) Uani 1 1 d . . . . .
 C54 C 0.7453(4) 0.0559(8) 0.1423(2) 0.0622(19) Uani 1 1 d . . . . .
 H54 H 0.799946 0.051700 0.147013 0.075 Uiso 1 1 calc R . . . .
 C55 C 0.7017(5) 0.0950(8) 0.0965(2) 0.066(2) Uani 1 1 d . . . . .
 H55 H 0.726187 0.114301 0.069900 0.079 Uiso 1 1 calc R . . . .
 C56 C 0.6217(4) 0.1038(8) 0.0919(3) 0.0599(19) Uani 1 1 d . . . . .
 C57 C 0.5832(4) 0.0749(8) 0.1299(2) 0.0557(18) Uani 1 1 d . . . . .
 C58 C 0.4927(4) 0.1284(9) 0.0628(2) 0.074(2) Uani 1 1 d . . . . .
 H58A H 0.462428 0.032344 0.044712 0.089 Uiso 1 1 calc R . . . .
 H58B H 0.464431 0.240402 0.054998 0.089 Uiso 1 1 calc R . . . .

loop_
  _atom_site_aniso_label
  _atom_site_aniso_U_11
  _atom_site_aniso_U_22
  _atom_site_aniso_U_33
  _atom_site_aniso_U_23
  _atom_site_aniso_U_13
  _atom_site_aniso_U_12
 O1 0.061(3) 0.070(3) 0.047(3) 0.000(2) 0.012(2) 0.004(3)
 O2 0.080(3) 0.097(4) 0.057(3) -0.010(3) 0.021(3) -0.003(3)
 O3 0.074(3) 0.088(4) 0.056(3) 0.009(2) 0.020(3) 0.003(3)
 O4 0.088(4) 0.133(5) 0.053(3) 0.026(3) 0.022(3) -0.004(4)
 C1 0.038(4) 0.026(4) 0.038(4) -0.007(3) 0.011(3) -0.008(3)
 C2 0.047(4) 0.022(4) 0.044(4) -0.003(3) 0.004(3) -0.011(3)
 C3 0.037(4) 0.036(4) 0.053(4) -0.003(4) -0.008(4) -0.007(3)
 C4 0.053(4) 0.033(4) 0.036(4) -0.005(3) 0.004(4) -0.012(3)
 C5 0.054(4) 0.026(4) 0.054(4) -0.012(3) 0.025(4) -0.007(3)
 C6 0.051(4) 0.026(4) 0.047(4) -0.004(3) 0.013(4) -0.005(3)
 C7 0.044(4) 0.031(4) 0.050(4) -0.005(3) 0.019(3) -0.001(3)
 C8 0.055(4) 0.034(4) 0.049(4) -0.006(3) 0.008(3) 0.007(3)
 C9 0.063(5) 0.040(4) 0.055(4) -0.001(3) 0.024(4) -0.002(4)
 C10 0.071(5) 0.051(5) 0.059(4) -0.020(4) 0.038(4) -0.011(4)
 C11 0.068(5) 0.049(5) 0.040(4) -0.005(3) 0.006(4) -0.002(4)
 C12 0.066(5) 0.040(4) 0.036(4) -0.015(3) 0.009(4) -0.012(4)
 C13 0.064(4) 0.054(5) 0.044(4) -0.006(3) -0.004(4) -0.022(4)
 C14 0.060(5) 0.049(5) 0.065(5) -0.023(4) 0.004(4) -0.008(4)
 C15 0.054(5) 0.052(5) 0.069(5) -0.011(4) -0.016(4) -0.015(4)
 C16 0.036(4) 0.051(5) 0.061(4) -0.010(4) -0.001(4) 0.001(3)
 C17 0.040(4) 0.042(4) 0.057(4) -0.011(4) 0.018(4) -0.005(3)
 C18 0.031(4) 0.042(4) 0.073(5) -0.003(4) 0.019(3) -0.007(3)
 C19 0.049(4) 0.026(4) 0.047(4) -0.007(3) 0.011(4) -0.009(3)
 C20 0.042(4) 0.031(4) 0.045(4) 0.003(3) 0.013(4) 0.004(3)
 C21 0.055(4) 0.035(4) 0.046(4) 0.002(3) 0.019(4) -0.001(3)
 C22 0.038(4) 0.039(4) 0.049(4) -0.001(3) -0.003(3) 0.010(3)
 C23 0.054(4) 0.037(4) 0.034(3) -0.008(3) 0.003(3) -0.005(3)
 C24 0.050(3) 0.037(4) 0.063(4) 0.001(3) 0.028(3) -0.008(3)
 C25 0.042(4) 0.039(4) 0.065(4) 0.002(3) 0.017(3) -0.008(3)
 C26 0.067(4) 0.052(5) 0.074(4) 0.000(4) 0.031(4) -0.005(4)
 C27 0.055(4) 0.063(5) 0.037(4) -0.003(3) 0.009(3) 0.002(4)
 C28 0.044(4) 0.040(4) 0.069(4) -0.002(3) 0.022(3) -0.004(3)
 C29 0.072(5) 0.094(6) 0.058(5) 0.000(4) 0.005(4) 0.012(5)
 C30 0.039(4) 0.033(4) 0.058(4) 0.006(3) 0.013(4) 0.000(3)
 C31 0.053(5) 0.030(4) 0.053(4) 0.006(3) 0.016(4) 0.009(3)
 C32 0.037(4) 0.029(4) 0.065(5) 0.014(3) 0.010(4) 0.013(3)
 C33 0.057(5) 0.029(4) 0.045(4) 0.012(3) 0.003(4) 0.007(4)
 C34 0.044(4) 0.027(4) 0.047(4) 0.011(3) 0.010(4) 0.002(3)
 C35 0.041(4) 0.044(4) 0.051(4) 0.006(3) 0.011(4) -0.016(3)
 C36 0.029(3) 0.044(4) 0.056(4) 0.004(3) 0.009(3) -0.004(3)
 C37 0.037(4) 0.074(5) 0.049(4) 0.009(3) 0.007(3) 0.002(3)
 C38 0.064(5) 0.054(5) 0.044(4) 0.012(3) 0.013(4) -0.001(4)
 C39 0.052(4) 0.062(5) 0.054(4) 0.008(4) 0.014(4) 0.004(4)
 C40 0.086(5) 0.046(5) 0.045(4) 0.000(3) 0.028(4) 0.000(4)
 C41 0.064(5) 0.033(4) 0.049(4) 0.010(3) 0.011(4) 0.007(4)
 C42 0.067(5) 0.042(4) 0.052(4) 0.010(3) 0.000(4) -0.003(4)
 C43 0.041(4) 0.037(4) 0.071(5) 0.008(3) -0.002(4) 0.014(4)
 C44 0.054(5) 0.039(5) 0.087(5) 0.004(4) -0.012(4) 0.013(4)
 C45 0.049(5) 0.031(4) 0.103(6) 0.013(4) 0.022(5) 0.016(4)
 C46 0.053(5) 0.041(5) 0.069(5) 0.007(4) 0.005(4) 0.007(4)
 C47 0.050(5) 0.036(4) 0.107(6) 0.008(4) 0.030(4) 0.026(4)
 C48 0.048(4) 0.046(5) 0.061(5) -0.002(3) 0.024(4) 0.011(4)
 C49 0.042(4) 0.036(4) 0.047(4) -0.003(3) 0.010(4) 0.003(3)
 C50 0.052(4) 0.047(4) 0.050(4) -0.009(3) 0.020(4) -0.003(4)
 C51 0.052(4) 0.046(4) 0.044(4) 0.000(3) 0.008(3) -0.002(3)
 C52 0.066(5) 0.039(4) 0.045(4) -0.004(3) 0.019(4) 0.000(4)
 C53 0.068(5) 0.029(4) 0.069(5) -0.003(3) 0.025(4) 0.009(4)
 C54 0.068(5) 0.054(5) 0.075(5) -0.003(4) 0.038(5) -0.004(4)
 C55 0.105(6) 0.053(5) 0.050(5) 0.001(4) 0.041(5) 0.008(5)
 C56 0.066(5) 0.049(5) 0.070(5) 0.007(4) 0.029(5) 0.001(4)
 C57 0.063(5) 0.048(5) 0.065(5) -0.005(4) 0.035(5) -0.008(4)
 C58 0.086(6) 0.091(6) 0.048(5) 0.010(4) 0.016(4) 0.007(5)

_geom_special_details
;
 All esds (except the esd in the dihedral angle between two l.s. planes)
 are estimated using the full covariance matrix.  The cell esds are taken
 into account individually in the estimation of esds in distances, angles
 and torsion angles; correlations between esds in cell parameters are only
 used when they are defined by crystal symmetry.  An approximate (isotropic)
 treatment of cell esds is used for estimating esds involving l.s. planes.
;
loop_
  _geom_bond_atom_site_label_1
  _geom_bond_atom_site_label_2
  _geom_bond_distance
  _geom_bond_site_symmetry_2
  _geom_bond_publ_flag
 O1 C28 1.385(6) . ?
 O1 C29 1.425(6) . ?
 O2 C27 1.388(6) . ?
 O2 C29 1.421(6) . ?
 O3 C57 1.378(6) . ?
 O3 C58 1.435(5) . ?
 O4 C56 1.378(7) . ?
 O4 C58 1.413(6) . ?
 C1 C2 1.433(6) . ?
 C1 C6 1.387(6) . ?
 C1 C20 1.368(6) . ?
 C2 C3 1.389(6) . ?
 C2 C17 1.403(6) . ?
 C3 C4 1.414(7) . ?
 C3 C14 1.385(7) . ?
 C4 C5 1.374(7) . ?
 C4 C12 1.386(6) . ?
 C5 C6 1.419(6) . ?
 C5 C9 1.385(7) . ?
 C6 C7 1.376(6) . ?
 C7 C8 1.558(5) . ?
 C7 C22 1.427(6) . ?
 C8 H8A 0.9700 . ?
 C8 H8B 0.9700 . ?
 C8 C9 1.559(6) . ?
 C9 C10 1.374(6) . ?
 C10 H10 0.9300 . ?
 C10 C11 1.430(7) . ?
 C11 H11 0.9300 . ?
 C11 C12 1.394(6) . ?
 C12 C13 1.548(7) . ?
 C13 H13A 0.9700 . ?
 C13 H13B 0.9700 . ?
 C13 C14 1.556(7) . ?
 C14 C15 1.382(7) . ?
 C15 H15 0.9300 . ?
 C15 C16 1.409(6) . ?
 C16 H16 0.9300 . ?
 C16 C17 1.416(7) . ?
 C17 C18 1.452(6) . ?
 C18 H18 0.9300 . ?
 C18 C19 1.348(6) . ?
 C19 C20 1.418(6) . ?
 C19 C24 1.486(7) . ?
 C20 C21 1.407(6) . ?
 C21 C22 1.408(6) . ?
 C21 C23 1.475(6) . ?
 C22 H22 0.9300 . ?
 C23 C24 1.426(7) . ?
 C23 C28 1.368(7) . ?
 C24 C25 1.405(6) . ?
 C25 H25 0.9300 . ?
 C25 C26 1.374(6) . ?
 C26 H26 0.9300 . ?
 C26 C27 1.365(7) . ?
 C27 C28 1.379(7) . ?
 C29 H29A 0.9700 . ?
 C29 H29B 0.9700 . ?
 C30 C31 1.418(7) . ?
 C30 C35 1.395(6) . ?
 C30 C49 1.375(6) . ?
 C31 C32 1.402(6) . ?
 C31 C46 1.406(7) . ?
 C32 C33 1.422(6) . ?
 C32 C43 1.390(7) . ?
 C33 C34 1.359(6) . ?
 C33 C41 1.389(7) . ?
 C34 C35 1.418(6) . ?
 C34 C38 1.401(7) . ?
 C35 C36 1.387(7) . ?
 C36 C37 1.551(6) . ?
 C36 C51 1.426(6) . ?
 C37 H37A 0.9700 . ?
 C37 H37B 0.9700 . ?
 C37 C38 1.547(6) . ?
 C38 C39 1.386(7) . ?
 C39 H39 0.9300 . ?
 C39 C40 1.436(7) . ?
 C40 H40 0.9300 . ?
 C40 C41 1.370(7) . ?
 C41 C42 1.547(7) . ?
 C42 H42A 0.9700 . ?
 C42 H42B 0.9700 . ?
 C42 C43 1.549(6) . ?
 C43 C44 1.381(7) . ?
 C44 H44 0.9300 . ?
 C44 C45 1.398(7) . ?
 C45 H45 0.9300 . ?
 C45 C46 1.404(7) . ?
 C46 C47 1.447(7) . ?
 C47 H47 0.9300 . ?
 C47 C48 1.354(7) . ?
 C48 C49 1.435(6) . ?
 C48 C53 1.491(7) . ?
 C49 C50 1.401(7) . ?
 C50 C51 1.407(6) . ?
 C50 C52 1.478(7) . ?
 C51 H51 0.9300 . ?
 C52 C53 1.443(7) . ?
 C52 C57 1.370(7) . ?
 C53 C54 1.383(6) . ?
 C54 H54 0.9300 . ?
 C54 C55 1.391(7) . ?
 C55 H55 0.9300 . ?
 C55 C56 1.366(7) . ?
 C56 C57 1.369(7) . ?
 C58 H58A 0.9700 . ?
 C58 H58B 0.9700 . ?

loop_
  _geom_angle_atom_site_label_1
  _geom_angle_atom_site_label_2
  _geom_angle_atom_site_label_3
  _geom_angle
  _geom_angle_site_symmetry_1
  _geom_angle_site_symmetry_3
  _geom_angle_publ_flag
 C28 O1 C29 103.6(4) . . ?
 C27 O2 C29 105.1(4) . . ?
 C57 O3 C58 105.8(5) . . ?
 C56 O4 C58 106.4(4) . . ?
 C6 C1 C2 121.5(5) . . ?
 C20 C1 C2 118.4(5) . . ?
 C20 C1 C6 116.1(5) . . ?
 C3 C2 C1 116.6(5) . . ?
 C3 C2 C17 119.8(6) . . ?
 C17 C2 C1 120.9(5) . . ?
 C2 C3 C4 121.8(6) . . ?
 C14 C3 C2 125.4(6) . . ?
 C14 C3 C4 109.0(6) . . ?
 C5 C4 C3 121.0(5) . . ?
 C5 C4 C12 122.1(6) . . ?
 C12 C4 C3 113.1(6) . . ?
 C4 C5 C6 118.6(5) . . ?
 C4 C5 C9 124.2(6) . . ?
 C9 C5 C6 112.2(6) . . ?
 C1 C6 C5 120.4(6) . . ?
 C7 C6 C1 125.3(5) . . ?
 C7 C6 C5 111.0(5) . . ?
 C6 C7 C8 107.2(4) . . ?
 C6 C7 C22 118.2(5) . . ?
 C22 C7 C8 132.8(5) . . ?
 C7 C8 H8A 111.2 . . ?
 C7 C8 H8B 111.2 . . ?
 C7 C8 C9 102.9(4) . . ?
 H8A C8 H8B 109.1 . . ?
 C9 C8 H8A 111.2 . . ?
 C9 C8 H8B 111.2 . . ?
 C5 C9 C8 105.9(5) . . ?
 C10 C9 C5 114.6(6) . . ?
 C10 C9 C8 138.4(6) . . ?
 C9 C10 H10 119.1 . . ?
 C9 C10 C11 121.7(5) . . ?
 C11 C10 H10 119.1 . . ?
 C10 C11 H11 119.1 . . ?
 C12 C11 C10 121.9(5) . . ?
 C12 C11 H11 119.1 . . ?
 C4 C12 C11 114.9(6) . . ?
 C4 C12 C13 106.6(5) . . ?
 C11 C12 C13 137.1(6) . . ?
 C12 C13 H13A 111.4 . . ?
 C12 C13 H13B 111.4 . . ?
 C12 C13 C14 101.9(4) . . ?
 H13A C13 H13B 109.3 . . ?
 C14 C13 H13A 111.4 . . ?
 C14 C13 H13B 111.4 . . ?
 C3 C14 C13 108.9(5) . . ?
 C15 C14 C3 114.7(6) . . ?
 C15 C14 C13 135.4(7) . . ?
 C14 C15 H15 119.3 . . ?
 C14 C15 C16 121.4(6) . . ?
 C16 C15 H15 119.3 . . ?
 C15 C16 H16 118.7 . . ?
 C15 C16 C17 122.6(5) . . ?
 C17 C16 H16 118.7 . . ?
 C2 C17 C16 115.1(5) . . ?
 C2 C17 C18 117.8(6) . . ?
 C16 C17 C18 126.3(6) . . ?
 C17 C18 H18 119.7 . . ?
 C19 C18 C17 120.5(5) . . ?
 C19 C18 H18 119.7 . . ?
 C18 C19 C20 120.4(5) . . ?
 C18 C19 C24 134.6(6) . . ?
 C20 C19 C24 103.8(5) . . ?
 C1 C20 C19 121.6(5) . . ?
 C1 C20 C21 121.7(5) . . ?
 C21 C20 C19 115.4(5) . . ?
 C20 C21 C22 121.2(5) . . ?
 C20 C21 C23 102.4(5) . . ?
 C22 C21 C23 135.1(6) . . ?
 C7 C22 H22 121.5 . . ?
 C21 C22 C7 117.1(5) . . ?
 C21 C22 H22 121.5 . . ?
 C24 C23 C21 110.7(5) . . ?
 C28 C23 C21 133.9(6) . . ?
 C28 C23 C24 115.2(5) . . ?
 C23 C24 C19 107.2(5) . . ?
 C25 C24 C19 131.8(5) . . ?
 C25 C24 C23 121.0(5) . . ?
 C24 C25 H25 118.8 . . ?
 C26 C25 C24 122.4(6) . . ?
 C26 C25 H25 118.8 . . ?
 C25 C26 H26 122.5 . . ?
 C27 C26 C25 115.0(6) . . ?
 C27 C26 H26 122.5 . . ?
 C26 C27 O2 126.8(6) . . ?
 C26 C27 C28 124.7(6) . . ?
 C28 C27 O2 108.5(5) . . ?
 C23 C28 O1 127.1(6) . . ?
 C23 C28 C27 121.6(6) . . ?
 C27 C28 O1 111.2(5) . . ?
 O1 C29 H29A 109.9 . . ?
 O1 C29 H29B 109.9 . . ?
 O2 C29 O1 109.1(5) . . ?
 O2 C29 H29A 109.9 . . ?
 O2 C29 H29B 109.9 . . ?
 H29A C29 H29B 108.3 . . ?
 C35 C30 C31 122.1(5) . . ?
 C49 C30 C31 118.2(5) . . ?
 C49 C30 C35 116.0(6) . . ?
 C32 C31 C30 116.7(5) . . ?
 C32 C31 C46 118.1(6) . . ?
 C46 C31 C30 121.9(6) . . ?
 C31 C32 C33 121.7(6) . . ?
 C43 C32 C31 125.8(6) . . ?
 C43 C32 C33 109.4(6) . . ?
 C34 C33 C32 120.0(5) . . ?
 C34 C33 C41 121.8(6) . . ?
 C41 C33 C32 112.8(6) . . ?
 C33 C34 C35 120.6(5) . . ?
 C33 C34 C38 124.4(5) . . ?
 C38 C34 C35 110.2(6) . . ?
 C30 C35 C34 118.9(6) . . ?
 C36 C35 C30 125.3(5) . . ?
 C36 C35 C34 111.8(5) . . ?
 C35 C36 C37 107.0(5) . . ?
 C35 C36 C51 117.3(5) . . ?
 C51 C36 C37 134.1(5) . . ?
 C36 C37 H37A 111.2 . . ?
 C36 C37 H37B 111.2 . . ?
 H37A C37 H37B 109.1 . . ?
 C38 C37 C36 102.7(4) . . ?
 C38 C37 H37A 111.2 . . ?
 C38 C37 H37B 111.2 . . ?
 C34 C38 C37 107.4(5) . . ?
 C39 C38 C34 114.2(6) . . ?
 C39 C38 C37 136.4(6) . . ?
 C38 C39 H39 119.3 . . ?
 C38 C39 C40 121.4(5) . . ?
 C40 C39 H39 119.3 . . ?
 C39 C40 H40 119.0 . . ?
 C41 C40 C39 121.9(5) . . ?
 C41 C40 H40 119.0 . . ?
 C33 C41 C42 105.8(5) . . ?
 C40 C41 C33 116.0(6) . . ?
 C40 C41 C42 136.7(6) . . ?
 C41 C42 H42A 111.1 . . ?
 C41 C42 H42B 111.1 . . ?
 C41 C42 C43 103.1(4) . . ?
 H42A C42 H42B 109.1 . . ?
 C43 C42 H42A 111.1 . . ?
 C43 C42 H42B 111.1 . . ?
 C32 C43 C42 107.9(5) . . ?
 C44 C43 C32 115.2(6) . . ?
 C44 C43 C42 135.3(6) . . ?
 C43 C44 H44 119.6 . . ?
 C43 C44 C45 120.8(6) . . ?
 C45 C44 H44 119.6 . . ?
 C44 C45 H45 118.2 . . ?
 C44 C45 C46 123.5(6) . . ?
 C46 C45 H45 118.2 . . ?
 C31 C46 C47 116.8(6) . . ?
 C45 C46 C31 116.2(6) . . ?
 C45 C46 C47 125.8(6) . . ?
 C46 C47 H47 118.9 . . ?
 C48 C47 C46 122.3(6) . . ?
 C48 C47 H47 118.9 . . ?
 C47 C48 C49 118.4(6) . . ?
 C47 C48 C53 136.8(6) . . ?
 C49 C48 C53 104.2(5) . . ?
 C30 C49 C48 122.0(6) . . ?
 C30 C49 C50 121.8(5) . . ?
 C50 C49 C48 114.5(5) . . ?
 C49 C50 C51 120.9(5) . . ?
 C49 C50 C52 103.4(5) . . ?
 C51 C50 C52 134.7(6) . . ?
 C36 C51 H51 120.9 . . ?
 C50 C51 C36 118.3(5) . . ?
 C50 C51 H51 120.9 . . ?
 C53 C52 C50 110.4(6) . . ?
 C57 C52 C50 134.2(6) . . ?
 C57 C52 C53 115.4(6) . . ?
 C52 C53 C48 106.7(5) . . ?
 C54 C53 C48 131.6(6) . . ?
 C54 C53 C52 121.7(6) . . ?
 C53 C54 H54 119.9 . . ?
 C53 C54 C55 120.1(6) . . ?
 C55 C54 H54 119.9 . . ?
 C54 C55 H55 121.2 . . ?
 C56 C55 C54 117.5(6) . . ?
 C56 C55 H55 121.2 . . ?
 C55 C56 O4 126.9(6) . . ?
 C55 C56 C57 123.3(7) . . ?
 C57 C56 O4 109.9(6) . . ?
 C52 C57 O3 128.3(6) . . ?
 C56 C57 O3 109.8(6) . . ?
 C56 C57 C52 121.9(6) . . ?
 O3 C58 H58A 110.1 . . ?
 O3 C58 H58B 110.1 . . ?
 O4 C58 O3 108.0(5) . . ?
 O4 C58 H58A 110.1 . . ?
 O4 C58 H58B 110.1 . . ?
 H58A C58 H58B 108.4 . . ?

loop_
  _geom_torsion_atom_site_label_1
  _geom_torsion_atom_site_label_2
  _geom_torsion_atom_site_label_3
  _geom_torsion_atom_site_label_4
  _geom_torsion
  _geom_torsion_site_symmetry_1
  _geom_torsion_site_symmetry_2
  _geom_torsion_site_symmetry_3
  _geom_torsion_site_symmetry_4
  _geom_torsion_publ_flag
 O2 C27 C28 O1 -0.4(7) . . . . ?
 O2 C27 C28 C23 176.8(5) . . . . ?
 O4 C56 C57 O3 -1.1(7) . . . . ?
 O4 C56 C57 C52 179.7(6) . . . . ?
 C1 C2 C3 C4 -2.9(8) . . . . ?
 C1 C2 C3 C14 -158.5(5) . . . . ?
 C1 C2 C17 C16 166.4(5) . . . . ?
 C1 C2 C17 C18 -4.2(7) . . . . ?
 C1 C6 C7 C8 -161.9(5) . . . . ?
 C1 C6 C7 C22 4.9(8) . . . . ?
 C1 C20 C21 C22 5.4(8) . . . . ?
 C1 C20 C21 C23 174.3(5) . . . . ?
 C2 C1 C6 C5 -2.7(8) . . . . ?
 C2 C1 C6 C7 155.1(5) . . . . ?
 C2 C1 C20 C19 5.3(8) . . . . ?
 C2 C1 C20 C21 -161.0(5) . . . . ?
 C2 C3 C4 C5 1.5(8) . . . . ?
 C2 C3 C4 C12 -157.0(5) . . . . ?
 C2 C3 C14 C13 161.2(5) . . . . ?
 C2 C3 C14 C15 -9.5(9) . . . . ?
 C2 C17 C18 C19 5.1(8) . . . . ?
 C3 C2 C17 C16 5.7(7) . . . . ?
 C3 C2 C17 C18 -164.9(5) . . . . ?
 C3 C4 C5 C6 -0.5(8) . . . . ?
 C3 C4 C5 C9 -153.4(6) . . . . ?
 C3 C4 C12 C11 162.5(5) . . . . ?
 C3 C4 C12 C13 -6.2(6) . . . . ?
 C3 C14 C15 C16 6.9(8) . . . . ?
 C4 C3 C14 C13 3.0(6) . . . . ?
 C4 C3 C14 C15 -167.7(5) . . . . ?
 C4 C5 C6 C1 1.1(8) . . . . ?
 C4 C5 C6 C7 -159.6(5) . . . . ?
 C4 C5 C9 C8 162.1(5) . . . . ?
 C4 C5 C9 C10 -8.4(8) . . . . ?
 C4 C12 C13 C14 7.2(6) . . . . ?
 C5 C4 C12 C11 4.3(8) . . . . ?
 C5 C4 C12 C13 -164.4(5) . . . . ?
 C5 C6 C7 C8 -2.3(6) . . . . ?
 C5 C6 C7 C22 164.5(5) . . . . ?
 C5 C9 C10 C11 6.3(8) . . . . ?
 C6 C1 C2 C3 3.5(8) . . . . ?
 C6 C1 C2 C17 -157.8(5) . . . . ?
 C6 C1 C20 C19 163.5(5) . . . . ?
 C6 C1 C20 C21 -2.9(8) . . . . ?
 C6 C5 C9 C8 7.7(6) . . . . ?
 C6 C5 C9 C10 -162.8(5) . . . . ?
 C6 C7 C8 C9 6.5(5) . . . . ?
 C6 C7 C22 C21 -2.2(7) . . . . ?
 C7 C8 C9 C5 -8.5(6) . . . . ?
 C7 C8 C9 C10 158.5(7) . . . . ?
 C8 C7 C22 C21 160.5(5) . . . . ?
 C8 C9 C10 C11 -159.9(6) . . . . ?
 C9 C5 C6 C1 157.1(5) . . . . ?
 C9 C5 C6 C7 -3.6(7) . . . . ?
 C9 C10 C11 C12 0.8(9) . . . . ?
 C10 C11 C12 C4 -6.1(8) . . . . ?
 C10 C11 C12 C13 157.9(6) . . . . ?
 C11 C12 C13 C14 -157.6(6) . . . . ?
 C12 C4 C5 C6 156.1(5) . . . . ?
 C12 C4 C5 C9 3.2(9) . . . . ?
 C12 C13 C14 C3 -6.2(6) . . . . ?
 C12 C13 C14 C15 161.6(6) . . . . ?
 C13 C14 C15 C16 -160.4(6) . . . . ?
 C14 C3 C4 C5 160.6(5) . . . . ?
 C14 C3 C4 C12 2.1(7) . . . . ?
 C14 C15 C16 C17 1.5(9) . . . . ?
 C15 C16 C17 C2 -8.0(8) . . . . ?
 C15 C16 C17 C18 161.7(5) . . . . ?
 C16 C17 C18 C19 -164.4(5) . . . . ?
 C17 C2 C3 C4 158.7(5) . . . . ?
 C17 C2 C3 C14 3.1(9) . . . . ?
 C17 C18 C19 C20 -0.8(8) . . . . ?
 C17 C18 C19 C24 164.4(5) . . . . ?
 C18 C19 C20 C1 -4.5(8) . . . . ?
 C18 C19 C20 C21 162.6(5) . . . . ?
 C18 C19 C24 C23 -163.9(6) . . . . ?
 C18 C19 C24 C25 14.2(11) . . . . ?
 C19 C20 C21 C22 -161.7(5) . . . . ?
 C19 C20 C21 C23 7.1(6) . . . . ?
 C19 C24 C25 C26 -178.9(5) . . . . ?
 C20 C1 C2 C3 160.4(5) . . . . ?
 C20 C1 C2 C17 -0.9(8) . . . . ?
 C20 C1 C6 C5 -160.1(5) . . . . ?
 C20 C1 C6 C7 -2.3(8) . . . . ?
 C20 C19 C24 C23 3.1(6) . . . . ?
 C20 C19 C24 C25 -178.8(6) . . . . ?
 C20 C21 C22 C7 -2.7(8) . . . . ?
 C20 C21 C23 C24 -4.7(6) . . . . ?
 C20 C21 C23 C28 -179.9(6) . . . . ?
 C21 C23 C24 C19 1.1(6) . . . . ?
 C21 C23 C24 C25 -177.3(5) . . . . ?
 C21 C23 C28 O1 -4.9(11) . . . . ?
 C21 C23 C28 C27 178.4(6) . . . . ?
 C22 C7 C8 C9 -157.5(6) . . . . ?
 C22 C21 C23 C24 161.7(6) . . . . ?
 C22 C21 C23 C28 -13.4(11) . . . . ?
 C23 C21 C22 C7 -167.2(6) . . . . ?
 C23 C24 C25 C26 -1.1(8) . . . . ?
 C24 C19 C20 C1 -173.8(5) . . . . ?
 C24 C19 C20 C21 -6.6(6) . . . . ?
 C24 C23 C28 O1 -179.8(5) . . . . ?
 C24 C23 C28 C27 3.4(8) . . . . ?
 C24 C25 C26 C27 1.0(8) . . . . ?
 C25 C26 C27 O2 -179.3(5) . . . . ?
 C25 C26 C27 C28 1.4(9) . . . . ?
 C26 C27 C28 O1 179.0(5) . . . . ?
 C26 C27 C28 C23 -3.8(10) . . . . ?
 C27 O2 C29 O1 -15.7(6) . . . . ?
 C28 O1 C29 O2 15.2(6) . . . . ?
 C28 C23 C24 C19 177.2(5) . . . . ?
 C28 C23 C24 C25 -1.2(8) . . . . ?
 C29 O1 C28 C23 173.9(6) . . . . ?
 C29 O1 C28 C27 -9.1(6) . . . . ?
 C29 O2 C27 C26 -169.6(6) . . . . ?
 C29 O2 C27 C28 9.8(7) . . . . ?
 C30 C31 C32 C33 0.2(8) . . . . ?
 C30 C31 C32 C43 -157.5(6) . . . . ?
 C30 C31 C46 C45 162.8(5) . . . . ?
 C30 C31 C46 C47 -5.2(8) . . . . ?
 C30 C35 C36 C37 -161.6(5) . . . . ?
 C30 C35 C36 C51 6.2(9) . . . . ?
 C30 C49 C50 C51 4.9(9) . . . . ?
 C30 C49 C50 C52 175.2(5) . . . . ?
 C31 C30 C35 C34 -1.7(8) . . . . ?
 C31 C30 C35 C36 154.0(6) . . . . ?
 C31 C30 C49 C48 4.1(8) . . . . ?
 C31 C30 C49 C50 -160.6(5) . . . . ?
 C31 C32 C33 C34 -1.4(8) . . . . ?
 C31 C32 C33 C41 -155.8(5) . . . . ?
 C31 C32 C43 C42 161.5(5) . . . . ?
 C31 C32 C43 C44 -6.4(9) . . . . ?
 C31 C46 C47 C48 6.5(9) . . . . ?
 C32 C31 C46 C45 4.1(8) . . . . ?
 C32 C31 C46 C47 -163.9(5) . . . . ?
 C32 C33 C34 C35 1.0(8) . . . . ?
 C32 C33 C34 C38 -152.1(5) . . . . ?
 C32 C33 C41 C40 159.1(5) . . . . ?
 C32 C33 C41 C42 -9.3(6) . . . . ?
 C32 C43 C44 C45 3.9(8) . . . . ?
 C33 C32 C43 C42 1.6(6) . . . . ?
 C33 C32 C43 C44 -166.4(5) . . . . ?
 C33 C34 C35 C30 0.5(8) . . . . ?
 C33 C34 C35 C36 -158.3(5) . . . . ?
 C33 C34 C38 C37 162.6(5) . . . . ?
 C33 C34 C38 C39 -3.9(8) . . . . ?
 C33 C41 C42 C43 9.4(6) . . . . ?
 C34 C33 C41 C40 5.1(8) . . . . ?
 C34 C33 C41 C42 -163.2(5) . . . . ?
 C34 C35 C36 C37 -4.4(6) . . . . ?
 C34 C35 C36 C51 163.4(5) . . . . ?
 C34 C38 C39 C40 2.6(8) . . . . ?
 C35 C30 C31 C32 1.4(8) . . . . ?
 C35 C30 C31 C46 -157.7(6) . . . . ?
 C35 C30 C49 C48 163.3(5) . . . . ?
 C35 C30 C49 C50 -1.5(8) . . . . ?
 C35 C34 C38 C37 7.1(6) . . . . ?
 C35 C34 C38 C39 -159.4(5) . . . . ?
 C35 C36 C37 C38 8.1(6) . . . . ?
 C35 C36 C51 C50 -2.5(8) . . . . ?
 C36 C37 C38 C34 -9.2(6) . . . . ?
 C36 C37 C38 C39 152.9(7) . . . . ?
 C37 C36 C51 C50 161.2(6) . . . . ?
 C37 C38 C39 C40 -158.6(6) . . . . ?
 C38 C34 C35 C30 157.0(5) . . . . ?
 C38 C34 C35 C36 -1.8(7) . . . . ?
 C38 C39 C40 C41 2.6(9) . . . . ?
 C39 C40 C41 C33 -6.3(8) . . . . ?
 C39 C40 C41 C42 157.2(6) . . . . ?
 C40 C41 C42 C43 -155.2(7) . . . . ?
 C41 C33 C34 C35 153.2(5) . . . . ?
 C41 C33 C34 C38 0.0(9) . . . . ?
 C41 C42 C43 C32 -6.7(6) . . . . ?
 C41 C42 C43 C44 157.7(6) . . . . ?
 C42 C43 C44 C45 -159.7(6) . . . . ?
 C43 C32 C33 C34 159.6(5) . . . . ?
 C43 C32 C33 C41 5.1(7) . . . . ?
 C43 C44 C45 C46 2.4(9) . . . . ?
 C44 C45 C46 C31 -6.5(9) . . . . ?
 C44 C45 C46 C47 160.3(6) . . . . ?
 C45 C46 C47 C48 -160.2(6) . . . . ?
 C46 C31 C32 C33 160.0(5) . . . . ?
 C46 C31 C32 C43 2.3(9) . . . . ?
 C46 C47 C48 C49 -2.6(9) . . . . ?
 C46 C47 C48 C53 166.7(6) . . . . ?
 C47 C48 C49 C30 -2.9(9) . . . . ?
 C47 C48 C49 C50 162.9(5) . . . . ?
 C47 C48 C53 C52 -164.9(7) . . . . ?
 C47 C48 C53 C54 14.4(12) . . . . ?
 C48 C49 C50 C51 -160.9(5) . . . . ?
 C48 C49 C50 C52 9.4(6) . . . . ?
 C48 C53 C54 C55 178.1(6) . . . . ?
 C49 C30 C31 C32 159.2(5) . . . . ?
 C49 C30 C31 C46 0.1(8) . . . . ?
 C49 C30 C35 C34 -160.0(5) . . . . ?
 C49 C30 C35 C36 -4.2(9) . . . . ?
 C49 C48 C53 C52 5.4(6) . . . . ?
 C49 C48 C53 C54 -175.3(6) . . . . ?
 C49 C50 C51 C36 -2.8(8) . . . . ?
 C49 C50 C52 C53 -5.4(6) . . . . ?
 C49 C50 C52 C57 172.1(7) . . . . ?
 C50 C52 C53 C48 -0.1(6) . . . . ?
 C50 C52 C53 C54 -179.5(5) . . . . ?
 C50 C52 C57 O3 2.1(11) . . . . ?
 C50 C52 C57 C56 -178.9(6) . . . . ?
 C51 C36 C37 C38 -156.8(6) . . . . ?
 C51 C50 C52 C53 162.9(6) . . . . ?
 C51 C50 C52 C57 -19.7(11) . . . . ?
 C52 C50 C51 C36 -169.4(6) . . . . ?
 C52 C53 C54 C55 -2.7(9) . . . . ?
 C53 C48 C49 C30 -175.4(5) . . . . ?
 C53 C48 C49 C50 -9.6(7) . . . . ?
 C53 C52 C57 O3 179.5(5) . . . . ?
 C53 C52 C57 C56 -1.5(9) . . . . ?
 C53 C54 C55 C56 1.6(9) . . . . ?
 C54 C55 C56 O4 -179.5(6) . . . . ?
 C54 C55 C56 C57 -0.5(10) . . . . ?
 C55 C56 C57 O3 179.8(6) . . . . ?
 C55 C56 C57 C52 0.6(10) . . . . ?
 C56 O4 C58 O3 2.6(7) . . . . ?
 C57 O3 C58 O4 -3.2(7) . . . . ?
 C57 C52 C53 C48 -178.1(5) . . . . ?
 C57 C52 C53 C54 2.5(8) . . . . ?
 C58 O3 C57 C52 -178.2(6) . . . . ?
 C58 O3 C57 C56 2.7(7) . . . . ?
 C58 O4 C56 C55 178.1(7) . . . . ?
 C58 O4 C56 C57 -1.0(7) . . . . ?

loop_
  _refln_index_h
  _refln_index_k
  _refln_index_l
  _refln_F_squared_meas
  _refln_F_squared_sigma
 0 0 5 -0.35 0.39
 0 0 5 0.64 0.28
 0 0 -5 1.06 0.3
 0 0 -5 0.46 0.27
 0 0 6 190.52 3
 0 0 6 183.09 2.79
 0 0 -6 188.95 2.9
 0 0 -6 190.27 3.02
 0 0 7 0.14 0.62
 0 0 7 0.76 0.35
 0 0 -7 0.57 0.37
 0 0 -7 0.56 0.41
 0 0 8 1.61 0.7
 0 0 8 0.99 0.41
 0 0 -8 -0.76 0.65
 0 0 -8 1.96 0.7
 0 0 9 -0.15 0.64
 0 0 -9 1.43 0.79
 0 0 -9 1.54 0.52
 0 0 10 67.18 1.3
 0 0 10 63.17 1.49
 0 0 -10 67.38 1.49
 0 0 -10 70.62 1.52
 0 0 11 0.73 0.55
 0 0 11 0.17 0.64
 0 0 -11 0.62 0.66
 0 0 -11 1.04 0.66
 0 0 12 33.47 1.03
 0 0 12 35.38 1.22
 0 0 -12 31.95 1.17
 0 0 -12 34.07 1.22
 0 0 13 2.2 0.68
 0 0 13 1.03 1.24
 0 0 -13 2.55 1.25
 0 0 -13 2.5 0.87
 0 0 14 18.98 1.22
 0 0 -14 18.23 1.09
 0 0 -14 20.43 1.24
 0 0 -15 0.38 0.99
 0 0 -15 -0.24 0.86
 0 0 -16 3.97 0.97
 0 0 -16 2.53 1.16
 0 0 -17 2.05 1.64
 0 0 -17 2.27 1.88
 0 0 -18 -0.51 1.14
 0 0 -19 2.22 1.27
 0 0 -20 0 1.32
 0 0 -21 0.48 1.98
 0 0 -22 4.69 1.47
 0 0 -23 2.7 1.52
 0 0 -24 0.48 1.58
 0 0 -25 1.24 2.65
 0 0 -26 4.52 1.91
 0 0 -27 1.01 1.81
 0 0 -28 1.33 2.89
 0 0 -29 6.52 3.05
 0 -1 2 38.04 0.49
 0 1 2 35.38 0.75
 0 1 -2 36.42 0.68
 0 -1 -2 38.52 0.77
 0 1 3 29.88 0.68
 0 -1 3 25.51 0.39
 0 1 -3 25.95 0.4
 0 -1 -3 26.05 0.69
 0 1 4 33.99 0.88
 0 -1 4 34.04 0.59
 0 -1 -4 34.46 0.86
 0 -1 -4 35.32 0.84
 0 1 -4 32.81 0.44
 0 1 5 7.6 0.43
 0 1 5 9.61 0.62
 0 -1 5 8.5 0.39
 0 -1 -5 11.18 0.63
 0 -1 -5 7.81 0.63
 0 1 -5 9.34 0.26
 0 -1 6 26.17 0.45
 0 1 6 24.78 0.67
 0 1 6 22.85 0.88
 0 -1 -6 24.01 0.62
 0 -1 -6 27.11 0.91
 0 1 -6 27.02 0.45
 0 -1 7 1.14 0.29
 0 1 7 1.81 0.6
 0 1 7 1.22 0.44
 0 1 -7 0.4 0.28
 0 -1 -7 2 0.4
 0 -1 -7 1.52 0.65
 0 -1 8 0.39 0.35
 0 1 8 0.08 0.73
 0 1 8 3.72 0.67
 0 -1 -8 -0.24 0.73
 0 1 -8 0.96 0.31
 0 -1 -8 -0.12 0.71
 0 1 9 6.82 0.79
 0 1 9 7.87 0.62
 0 -1 9 7.79 0.45
 0 -1 -9 7.06 1.32
 0 1 -9 6.23 0.59
 0 -1 -9 9.06 0.58
 0 -1 10 19.91 1.01
 0 1 10 18.77 1.23
 0 1 10 16.07 0.98
 0 -1 -10 21.16 0.76
 0 -1 -10 25.17 1.73
 0 1 -10 19.37 0.57
 0 1 -10 18.87 0.56
 0 -1 11 30.63 1.34
 0 1 11 29.34 1.08
 0 1 11 32.72 1.25
 0 -1 -11 28.11 1
 0 -1 -11 26.26 2.11
 0 1 -11 30.5 1.09
 0 1 -11 33.9 0.78
 0 1 12 -0.05 0.85
 0 1 12 -0.51 0.73
 0 -1 12 0.97 0.88
 0 -1 -12 3.25 1.55
 0 1 -12 0.22 0.5
 0 1 -12 -0.56 0.5
 0 -1 -12 0.09 0.68
 0 1 13 62.17 1.84
 0 1 13 61.91 2.83
 0 -1 -13 64.57 1.7
 0 1 -13 60.61 1.39
 0 1 -13 60.76 1.91
 0 -1 -13 65.89 3.33
 0 1 14 4.21 1.02
 0 1 14 3.23 0.95
 0 1 -14 3.66 0.7
 0 1 -14 4.08 0.65
 0 -1 -14 2.26 1.34
 0 1 15 63.24 2.27
 0 1 15 64.96 2.24
 0 1 -15 67.19 2.17
 0 1 -15 60.67 2.41
 0 -1 -15 72.07 2.11
 0 1 16 1.7 1.65
 0 1 -16 0.05 0.79
 0 1 -16 2.98 1.09
 0 -1 -16 0.34 1.02
 0 1 17 10.6 1.42
 0 1 -17 11.46 1.75
 0 1 -17 11.85 1.43
 0 -1 -17 16.56 1.99
 0 1 18 5.67 1.35
 0 1 -18 2.02 1.12
 0 -1 -18 3.19 1.27
 0 1 -18 4.7 1.36
 0 1 19 -2.76 2.12
 0 1 -19 2.65 1.77
 0 1 -19 1.42 0.94
 0 -1 -19 1.71 1.28
 0 1 20 0.32 1.36
 0 1 -20 1 1.02
 0 -1 -20 1.97 1.39
 0 1 -20 1.19 1.22
 0 1 21 3.98 1.64
 0 -1 -21 9.58 1.67
 0 1 -21 5.62 1.19
 0 1 22 7.52 1.76
 0 -1 -22 7.97 1.86
 0 1 -22 6.39 1.26
 0 -1 -23 6.37 2.07
 0 1 -23 0.63 1.19
 0 -1 -23 2.25 1.79
 0 -1 -24 7.81 2.32
 0 1 -24 2.04 2.12
 0 1 -25 19.77 2.62
 0 -1 -25 30.58 4.57
 0 -1 -26 -2.78 2.53
 0 1 -26 -2.66 1.36
 0 1 -27 -1.26 1.35
 0 -1 -27 3.45 2.46
 0 -1 -28 2.85 2.61
 0 -1 -29 -1.55 3.68
 0 -1 -30 1.13 2.41
 0 -1 -31 -1.9 2.48
 0 2 0 4389.17 470.75
 0 -2 0 4457.73 490.67
 0 2 1 298.25 7.19
 0 -2 1 294.6 7.39
 0 2 -1 285.17 6.42
 0 -2 -1 299.47 8.08
 0 -2 2 582.27 16.5
 0 2 2 581.09 19.54
 0 -2 -2 593.79 18.54
 0 2 -2 595.83 18.17
 0 2 3 812.27 29.49
 0 -2 3 801.87 26.5
 0 -2 -3 817.94 30.65
 0 2 -3 797.25 27.8
 0 2 4 57.68 1.61
 0 -2 4 57.92 1.11
 0 -2 -4 60.82 1.79
 0 2 -4 59.32 1.56
 0 2 5 206.59 5.24
 0 -2 5 223.98 4.4
 0 -2 -5 211.25 5.51
 0 2 -5 210.47 4.54
 0 2 6 37.63 1.45
 0 -2 6 36.4 1.08
 0 2 -6 37.03 0.82
 0 -2 -6 36.48 1.07
 0 -2 -6 40.14 1.61
 0 -2 7 9.45 0.67
 0 2 7 6.28 1.02
 0 -2 -7 7.11 0.72
 0 2 -7 7.72 0.5
 0 -2 -7 5.93 1.18
 0 -2 8 16.01 0.8
 0 2 8 14.29 1.22
 0 -2 -8 19.53 1.21
 0 -2 -8 17.16 2.13
 0 2 -8 16.44 0.58
 0 2 9 1.87 1.04
 0 -2 9 2.52 0.43
 0 -2 -9 3.56 0.69
 0 -2 -9 1.44 1.15
 0 2 -9 0.86 0.43
 0 2 10 27 1.55
 0 -2 10 28.03 0.74
 0 2 -10 26.4 0.75
 0 -2 -10 25.19 1.07
 0 2 11 2.92 1.15
 0 -2 11 2.74 0.76
 0 2 11 -0.04 0.89
 0 -2 -11 1.61 0.75
 0 2 -11 2.6 0.49
 0 2 12 27.27 1.39
 0 -2 12 29.27 0.85
 0 2 12 25.52 2.54
 0 -2 -12 29.44 1.8
 0 2 -12 28.53 1.13
 0 2 13 24.44 1.6
 0 2 13 23.4 1.34
 0 -2 13 20.7 0.88
 0 2 -13 21.31 0.76
 0 -2 -13 21.35 1.74
 0 -2 14 30.22 1.02
 0 2 14 33.51 1.67
 0 2 14 31.12 1.95
 0 -2 -14 31.21 1.42
 0 2 -14 33.24 0.95
 0 2 15 13.74 2.3
 0 -2 -15 7.8 1.09
 0 2 -15 8.49 0.68
 0 2 -15 7.81 0.98
 0 2 16 4.57 1.49
 0 -2 -16 7.18 1.67
 0 2 -16 5.69 0.75
 0 2 -16 6.1 1.17
 0 2 17 -2.28 1.48
 0 2 -17 0.42 0.74
 0 -2 -17 1.67 1.15
 0 2 -17 1.84 0.75
 0 2 18 7.71 2.64
 0 2 -18 8.89 0.95
 0 2 -18 8.73 0.93
 0 -2 -18 10.24 2.09
 0 2 19 -1.77 1.63
 0 2 -19 0.43 1.29
 0 -2 -19 -0.58 1.32
 0 2 -19 1.92 1.36
 0 2 20 8.5 1.9
 0 2 -20 9.96 1.56
 0 -2 -20 9.33 2.47
 0 2 -20 5.3 1.06
 0 2 21 -0.46 2.86
 0 2 -21 2.18 1.07
 0 2 -21 0.32 1.42
 0 -2 -21 0.83 1.58
 0 2 22 13.59 2.36
 0 -2 -22 17.18 3.09
 0 2 -22 10.72 1.79
 0 2 23 7.13 2.2
 0 -2 -23 3.7 1.93
 0 2 -23 1.11 1.68
 0 2 24 1.29 3.49
 0 2 -24 1.73 1.62
 0 -2 -24 1.7 2
 0 2 25 5.31 2.34
 0 -2 -25 10.92 3.28
 0 2 -25 3.39 1.74
 0 2 26 6.88 2.39
 0 -2 -26 2.83 2.2
 0 2 27 1.88 2.32
 0 -2 -27 -1.57 2.02
 0 -2 -28 1.51 2.89
 0 -2 -29 -6.21 3.28
 0 -2 -30 1.54 4.98
 0 -2 -31 9.45 3.71
 0 -2 -32 -8.23 3.69
 0 -2 -33 4.97 3.68
 0 3 0 -0.65 0.94
 0 -3 0 0.18 0.95
 0 3 1 6.23 1.1
 0 -3 1 8.41 0.99
 0 3 -1 5.42 1.01
 0 -3 -1 5.83 1.68
 0 3 2 25.92 1.51
 0 -3 2 26.04 1.79
 0 3 -2 24.35 1.29
 0 -3 -2 19.46 1.44
 0 -3 3 13.53 1.52
 0 3 3 14.5 1.32
 0 3 -3 16.1 1.06
 0 -3 -3 15.65 2.09
 0 3 4 4.77 1.76
 0 -3 4 5.47 1.25
 0 3 -4 3.07 0.86
 0 -3 5 2.03 1.11
 0 3 5 3.46 1.14
 0 3 -5 1.41 0.8
 0 -3 6 9.41 0.82
 0 3 6 8.49 2.12
 0 3 -6 10.97 1.34
 0 3 7 18.75 1.68
 0 -3 7 21.93 0.96
 0 3 -7 19.4 1.04
 0 3 8 0.18 1.32
 0 -3 8 1.77 1.01
 0 3 -8 0.46 1.13
 0 -3 -8 0.33 0.93
 0 -3 9 0.42 0.61
 0 3 9 -0.35 2.06
 0 3 -9 0.8 0.72
 0 -3 -9 -1.18 0.94
 0 3 10 3 1.5
 0 -3 10 5.79 1.13
 0 -3 -10 4.57 1.02
 0 3 -10 6.39 0.8
 0 3 11 1.77 1.55
 0 -3 11 4.13 0.72
 0 -3 -11 2.49 1.04
 0 3 -11 4.59 1.16
 0 -3 12 24.01 1.04
 0 3 12 22.1 2.13
 0 -3 -12 27.1 1.42
 0 3 -12 22.23 1.06
 0 -3 13 10.21 1.22
 0 3 13 5.09 1.83
 0 -3 -13 10.33 1.8
 0 3 -13 8.75 1.23
 0 -3 14 1.2 0.71
 0 3 14 1.58 1.65
 0 3 -14 0.21 0.74
 0 -3 -14 -0.05 1.73
 0 3 15 12.44 1.97
 0 -3 15 8.02 1.29
 0 -3 -15 10.98 1.41
 0 3 -15 8.85 1.38
 0 -3 16 4.71 1.22
 0 3 16 2.94 1.87
 0 3 -16 6.21 0.87
 0 -3 -16 5.84 1.35
 0 3 17 2.95 2.01
 0 -3 17 4.96 1.28
 0 3 -17 4.13 1.44
 0 -3 -17 6.88 2.04
 0 3 18 7.03 2.14
 0 -3 -18 9.02 1.51
 0 3 -18 8.51 1.51
 0 3 -18 8.8 0.82
 0 3 19 12.3 2.25
 0 3 -19 7.75 1.07
 0 -3 -19 13.29 1.66
 0 3 -19 9.23 0.88
 0 3 20 -0.19 2.23
 0 3 -20 4.61 1.02
 0 -3 -20 0.92 2.48
 0 3 21 10.43 3.39
 0 3 -21 2.59 1.61
 0 -3 -21 4.58 1.75
 0 3 22 -0.29 2.28
 0 3 -22 -0.51 1.53
 0 -3 -22 -0.39 2.76
 0 3 23 2 2.5
 0 -3 -23 2.66 1.91
 0 3 24 2.14 4.13
 0 -3 -24 6.23 3.27
 0 3 25 0.88 2.66
 0 -3 -25 0.66 1.98
 0 3 26 1.04 2.9
 0 -3 -26 6.67 3.3
 0 3 27 6.05 4.85
 0 -3 -27 5.31 2.26
 0 3 28 7.09 2.92
 0 -3 -28 2.6 2.21
 0 3 29 -0.22 2.82
 0 -3 -29 1.48 2.26
 0 3 30 1.1 2.91
 0 3 31 -0.98 3.09
 0 -3 -31 7.42 3.57
 0 -3 -33 -1.49 3.85
 0 4 0 69.56 4.2
 0 4 1 24.81 1.85
 0 4 -1 24.9 1.85
 0 4 2 84.03 3.5
 0 4 -2 93.25 3.42
 0 4 3 54.49 3.96
 0 4 -3 53.7 2.41
 0 4 4 3.64 1.56
 0 4 -4 4.65 1.31
 0 4 5 4.71 1.69
 0 -4 5 7.52 1.23
 0 4 -5 6.32 1.31
 0 4 6 6.64 2.57
 0 -4 6 3.3 1.16
 0 4 -6 4.13 1.23
 0 4 7 -3.18 1.62
 0 -4 7 1.85 1.02
 0 4 -7 -0.7 1.09
 0 4 8 19.75 2.24
 0 -4 8 17.05 1.37
 0 4 -8 18.84 2.2
 0 -4 9 2.41 1.04
 0 4 9 2.68 1.89
 0 4 -9 6.18 1.16
 0 4 10 4.51 1.85
 0 -4 10 4.03 1.03
 0 -4 -10 4.27 1.46
 0 4 -10 2.7 1.18
 0 -4 11 1.21 0.97
 0 4 11 3.84 1.89
 0 4 -11 -1.92 1.69
 0 -4 -11 2.59 1.33
 0 -4 12 8.45 1.71
 0 4 12 7.35 2.02
 0 4 -12 5.26 1.21
 0 -4 -12 4.66 1.46
 0 -4 13 10.02 1.8
 0 4 13 8.96 3.51
 0 4 -13 10.07 1.33
 0 -4 -13 9.78 1.61
 0 -4 14 -0.66 0.95
 0 4 14 -3.35 2.17
 0 4 -14 0.43 1.72
 0 -4 -14 -0.68 2.19
 0 -4 15 4.17 0.98
 0 4 15 4.43 2.37
 0 -4 -15 2.01 1.57
 0 4 -15 6.07 1.77
 0 -4 16 1.75 1.5
 0 4 16 9.46 3.54
 0 -4 -16 3.9 1.61
 0 4 -16 2.22 1.12
 0 -4 17 0.47 1.3
 0 4 17 -2.22 2.15
 0 -4 -17 -0.49 1.59
 0 4 -17 -2.45 1.12
 0 4 18 -2.32 2.43
 0 4 -18 -2.15 1.14
 0 -4 -18 -1.66 2.7
 0 4 19 8.7 2.76
 0 4 -19 11.28 1.95
 0 -4 -19 7.6 1.96
 0 4 20 -1.3 2.54
 0 -4 -20 -0.33 1.75
 0 4 -20 3.11 1.62
 0 4 21 -4.61 2.61
 0 -4 -21 1.04 1.85
 0 4 22 10.97 3.1
 0 -4 -22 7.27 2.09
 0 4 23 6 4.51
 0 -4 -23 2.43 3.06
 0 4 24 0.93 2.96
 0 -4 -24 1.67 2.07
 0 4 25 0.97 3.05
 0 -4 -25 2.42 3.27
 0 4 26 2.92 4.83
 0 -4 -26 3.88 2.29
 0 4 27 -5.43 3.18
 0 -4 -27 1.56 3.65
 0 4 28 9.71 3.57
 0 4 29 1.47 3.34
 0 4 30 -3.41 4.96
 0 4 31 0.85 3.32
 0 4 32 0.46 3.45
 0 5 0 1.47 1.76
 0 5 1 6.39 1.93
 0 5 -1 3.15 1.83
 0 5 2 3.95 2.8
 0 5 -2 -0.68 2.57
 0 5 3 1.11 1.88
 0 5 -3 -2.44 1.67
 0 5 4 1.05 1.97
 0 5 -4 1.71 1.68
 0 5 5 30.63 2.99
 0 5 -5 35.66 2.6
 0 5 6 3.21 2.15
 0 5 -6 9.01 2.63
 0 5 7 23.41 2.88
 0 5 -7 21.74 3.23
 0 5 8 7.11 2.44
 0 5 -8 7 1.75
 0 5 9 6.09 3.62
 0 5 -9 3.09 1.65
 0 5 10 0.52 2.31
 0 5 -10 -1.76 1.62
 0 5 11 6.06 2.41
 0 5 -11 2.75 2.33
 0 -5 -11 -2.89 1.85
 0 5 12 5.73 2.63
 0 5 -12 3.44 2.33
 0 -5 -12 4.32 1.86
 0 5 13 0.06 3.81
 0 5 -13 -0.41 1.4
 0 -5 -13 1 1.75
 0 5 14 4.9 2.75
 0 -5 -14 6.55 3.03
 0 5 -14 2.08 1.44
 0 5 15 -0.19 2.65
 0 -5 -15 1.45 1.9
 0 5 -15 -1.03 1.34
 0 5 16 0.78 2.94
 0 5 -16 1.71 1.32
 0 -5 -16 5.13 1.98
 0 5 17 9.55 4.37
 0 -5 -17 -1.71 3.14
 0 5 -17 3.66 1.26
 0 5 18 15.97 3.46
 0 -5 -18 11.61 2.34
 0 5 19 11.35 3.1
 0 -5 -19 4.12 2.21
 0 5 20 9.06 3.33
 0 -5 -20 6.32 3.44
 0 5 21 2.75 3.09
 0 -5 -21 -1.39 2.03
 0 5 22 -8.44 3.28
 0 -5 -22 3.72 3.08
 0 5 23 5.8 3.27
 0 -5 -23 -0.32 2.07
 0 5 24 2.94 5.19
 0 -5 -24 -0.73 2.06
 0 5 25 4.09 3.39
 0 5 26 3.11 3.49
 0 5 27 2.35 3.56
 0 5 28 2.91 5.73
 0 5 29 2.62 3.79
 0 5 30 5.69 4.04
 0 6 0 6.76 2.47
 0 6 1 8.84 2.6
 0 6 -1 5.48 3.71
 0 6 2 1.54 2.43
 0 6 -2 2.59 2.23
 0 6 3 1.42 2.62
 0 6 -3 7.16 2.34
 0 6 4 16.01 4.69
 0 6 -4 19.99 2.7
 0 6 5 17.56 2.79
 0 6 -5 5.99 2.37
 0 6 6 15.34 2.91
 0 6 -6 5.26 2.3
 0 6 7 20.73 3.36
 0 6 -7 19.3 4.16
 0 6 8 2.27 4.33
 0 6 -8 2.96 3.29
 0 6 9 -2.26 2.76
 0 6 -9 3.85 2.08
 0 6 10 -2.04 2.83
 0 6 -10 2.42 1.97
 0 6 11 1.97 2.93
 0 -6 -11 -0.69 2.43
 0 6 -11 0.75 1.95
 0 6 12 -2.83 3.03
 0 6 -12 0.09 1.83
 0 -6 -12 1.2 3.68
 0 6 13 14.12 5.72
 0 -6 -13 12.65 2.79
 0 6 -13 14.1 2.14
 0 6 14 11.65 3.67
 0 -6 -14 9.68 2.58
 0 6 -14 8.47 1.92
 0 6 15 3.99 3.3
 0 6 -15 2.26 1.67
 0 -6 -15 0.23 2.3
 0 6 16 5.69 3.5
 0 -6 -16 1.93 2.41
 0 6 17 12.67 5.06
 0 -6 -17 -2.69 3.53
 0 6 18 8.54 3.4
 0 -6 -18 3.11 2.44
 0 6 19 -1.64 3.44
 0 -6 -19 4.64 2.23
 0 6 20 -0.5 3.71
 0 -6 -20 7.81 3.63
 0 6 21 0.42 5.29
 0 -6 -21 1.11 2.28
 0 6 22 -6.77 3.55
 0 -6 -22 3.73 3.77
 0 6 23 5.74 3.78
 0 6 24 -5.86 3.96
 0 6 25 -2.76 5.87
 0 6 26 -3.74 3.93
 0 6 27 -0.37 3.83
 0 7 0 10.92 5.19
 0 7 1 -3.15 4.62
 0 7 -1 -0.48 2.92
 0 7 2 3.68 2.98
 0 7 -2 0.2 2.89
 0 7 3 5.37 3.19
 0 7 -3 2.87 2.93
 0 7 4 6.04 3.38
 0 7 -4 3.92 2.83
 0 7 5 8.99 3.44
 0 7 -5 4.95 2.88
 0 7 6 2.14 5.11
 0 7 -6 2.44 4.09
 0 7 7 2.59 5.23
 0 7 -7 7.32 4.21
 0 7 8 2.4 3.37
 0 7 -8 -3.7 3.67
 0 7 9 4.84 3.55
 0 7 -9 3.92 3.87
 0 7 10 -0.21 3.48
 0 7 -10 2.46 2.32
 0 7 11 2.72 3.68
 0 -7 -11 -0.03 4.51
 0 7 -11 3.92 2.18
 0 7 12 17.1 5.74
 0 7 -12 -1.13 2.2
 0 -7 -12 5.88 2.91
 0 7 13 3.67 3.86
 0 -7 -13 6.79 2.79
 0 7 -13 2.47 2.1
 0 7 14 3.66 3.99
 0 -7 -14 5.8 2.86
 0 7 15 4.4 4.07
 0 -7 -15 3.96 2.7
 0 7 16 -11.06 6.17
 0 -7 -16 -0.34 4.13
 0 7 17 4.77 3.76
 0 -7 -17 4.97 2.77
 0 7 18 -3.2 3.93
 0 -7 -18 -6.76 4.08
 0 7 19 10.82 3.91
 0 -7 -19 0.32 2.65
 0 7 20 3.87 3.99
 0 7 21 3.66 6.18
 0 7 22 4.79 4.16
 0 7 23 4.89 4.27
 0 7 24 -11.31 4.78
 0 8 0 6.91 3.76
 0 8 1 -0.15 3.6
 0 8 -1 4.05 3.46
 0 8 2 5.13 3.6
 0 8 -2 -0.17 3.36
 0 8 3 -3.16 5.94
 0 8 -3 -4.22 3.42
 0 8 4 15.1 5.94
 0 8 -4 3.28 3.23
 0 8 5 4.11 3.9
 0 8 -5 7.34 5.01
 0 8 6 10.43 4.21
 0 8 -6 7.78 5.05
 0 8 7 10.5 4.18
 0 8 -7 4.64 4.87
 0 8 8 5.93 4.12
 0 8 -8 7.68 4.64
 0 8 9 8.21 6.59
 0 8 -9 7.01 4.44
 0 8 10 -0.23 6.27
 0 8 -10 2.46 4.03
 0 8 11 5.02 4.16
 0 -8 -11 2.98 3.3
 0 8 12 5.48 4.14
 0 -8 -12 -4.55 3.12
 0 8 13 13.48 4.72
 0 -8 -13 9.52 3.51
 0 8 14 0.77 4.33
 0 -8 -14 -2.3 3.11
 0 8 15 -0.26 6.64
 0 -8 -15 3.81 2.99
 0 8 16 7.91 4.31
 0 -8 -16 2.18 3.06
 0 8 17 -1.78 4.22
 0 8 18 -2.21 4.25
 0 8 19 1.66 4.2
 0 9 0 -2.42 3.85
 0 9 1 -0.17 3.86
 0 9 -1 -1.19 3.73
 0 9 2 0.55 4.14
 0 9 -2 4.68 5.69
 0 9 3 8.07 4.27
 0 9 -3 -0.19 5.72
 0 9 4 -1.19 4.24
 0 9 -4 -3.75 5.69
 0 9 5 -0.07 4.11
 0 9 -5 -1.01 5.02
 0 9 6 7.16 6.66
 0 9 -6 -1.81 5.13
 0 9 7 0.76 6.53
 0 9 8 0.6 4.47
 0 9 9 -1.88 4.51
 0 9 10 1.36 4.6
 0 9 11 0.21 4.53
 0 -9 -11 -0.58 3.59
 0 9 12 8.99 4.87
 0 -9 -12 -1.84 3.64
 1 0 -29 -0.01 1.73
 1 0 -28 2.19 1.77
 1 0 -27 -2.7 2.65
 1 0 -26 2.04 1.6
 1 0 -25 -1.71 1.59
 1 0 -24 2.43 2.28
 1 0 -23 4.52 1.57
 1 0 -22 5.38 1.48
 1 0 -21 0.75 1.28
 1 0 -20 -4.84 1.94
 1 0 -19 0.33 1.12
 1 0 -18 11.09 1.17
 1 0 -18 9.75 1.37
 1 0 -18 1 1.41
 1 0 -17 1.64 1.18
 1 0 -17 0.04 1.12
 -1 0 17 -0.49 0.83
 1 0 -16 157.44 4.51
 1 0 -16 144.7 4.21
 -1 0 16 146.23 3.55
 1 0 -15 -1.08 1.01
 1 0 -15 0.38 0.9
 -1 0 15 -0.63 1.09
 1 0 -14 101.09 2.82
 1 0 -14 93.43 2.6
 -1 0 14 107.22 2.38
 1 0 -13 2.25 1.16
 1 0 -13 2.14 0.82
 -1 0 13 1.83 0.63
 -1 0 13 -0.44 0.87
 1 0 -12 151.29 3.53
 1 0 -12 146.07 3.94
 -1 0 12 147.66 3.48
 -1 0 12 139.25 3.45
 1 0 -11 0.06 0.89
 1 0 -11 0.34 0.68
 -1 0 11 0.83 0.68
 -1 0 11 1.04 0.49
 1 0 -10 26.23 1.14
 1 0 -10 19.17 1.32
 -1 0 10 22.17 0.95
 -1 0 10 23.48 0.92
 1 0 -9 -0.64 0.57
 1 0 -9 0.83 0.45
 -1 0 9 0.27 0.4
 -1 0 9 -0.12 0.56
 1 0 -8 141.04 2.25
 1 0 -8 133.1 2.51
 -1 0 8 133.51 2.47
 -1 0 8 133.34 2.47
 1 0 -7 -0.39 0.33
 1 0 -7 0.81 0.45
 -1 0 7 0.22 0.42
 -1 0 7 0.74 0.49
 1 0 -6 434.69 9.7
 1 0 -6 441.92 8.95
 -1 0 6 448.72 9.88
 -1 0 6 443.07 9.35
 1 0 -5 1.44 0.35
 1 0 -5 0.72 0.37
 -1 0 5 0.44 0.23
 -1 0 5 0.03 0.33
 1 0 4 9.73 0.25
 -1 0 -4 8.83 0.33
 -1 0 -4 10.78 0.4
 1 0 5 0.18 0.25
 -1 0 -5 0.55 0.31
 -1 0 -5 0.16 0.38
 1 0 6 36.97 0.85
 -1 0 -6 38.75 1.19
 -1 0 -6 40.06 0.79
 1 0 7 0.3 0.36
 -1 0 -7 1.53 0.73
 -1 0 -7 -0.21 0.66
 1 0 8 8.11 0.49
 -1 0 -8 7.84 0.57
 -1 0 -8 8.39 0.91
 1 0 9 -0.96 0.47
 -1 0 -9 -1.2 0.85
 -1 0 -9 1.54 0.88
 1 0 10 0 0.54
 -1 0 -10 1.9 1.01
 -1 0 -10 -0.59 0.63
 1 0 11 -0.8 0.94
 -1 0 -11 0.06 0.69
 -1 0 -11 -0.13 1.12
 1 0 12 -0.05 0.7
 -1 0 -12 4.37 1.2
 -1 0 -12 0.08 0.79
 1 0 13 -0.01 0.77
 -1 0 -13 -1.06 0.84
 -1 0 -13 0.41 0.87
 1 0 14 3.81 0.92
 -1 0 -14 1.94 1.01
 -1 0 -14 4.91 0.99
 1 0 15 -0.36 1.48
 -1 0 -15 -1.39 1
 -1 0 -15 2.38 1.73
 -1 0 -16 1.09 1.1
 -1 0 -17 0.08 1.8
 -1 0 -18 1.97 1.2
 -1 0 -19 0.33 1.22
 -1 0 -20 -0.15 1.27
 -1 0 -21 0.42 1.42
 -1 0 -22 30.72 3.45
 -1 0 -23 1.81 1.65
 -1 0 -24 0.83 1.74
 -1 0 -25 -2.71 1.9
 -1 0 -26 2.98 2.96
 -1 0 -27 -2.11 2.93
 -1 0 -28 -2.16 1.9
 -1 0 -29 -2.74 1.98
 -1 0 -30 2.05 3.11
 1 -1 -31 -0.46 2.3
 1 -1 -30 0.7 2.48
 1 -1 -29 4.87 2.64
 1 -1 -28 3.55 2.49
 1 -1 -27 4.87 2.32
 1 1 -27 0.51 1.88
 1 1 -26 1.38 1.93
 1 -1 -26 3.14 2.33
 1 -1 -25 -0.11 2.16
 1 1 -25 1.47 1.19
 1 -1 -25 1.97 2.09
 -1 1 25 0.73 1.87
 1 1 -24 0.18 1.15
 1 -1 -24 0.88 1.99
 -1 1 24 1.08 1.84
 1 1 -23 -0.95 1.08
 1 -1 -23 -0.06 1.89
 -1 1 23 -0.78 1.61
 1 1 -22 6.42 1.38
 1 1 -22 3.72 1.7
 1 -1 -22 10.37 2.88
 -1 1 22 4.95 2.49
 1 1 -21 0.91 1.41
 1 -1 -21 -0.25 1.59
 1 1 -21 -0.48 1.17
 -1 1 21 3.64 1.52
 1 -1 -20 5.18 1.49
 1 1 -20 2.2 1.77
 1 1 -20 0.99 1.37
 -1 1 20 3.52 1.45
 1 1 -19 5.08 1.08
 1 1 -19 3.64 0.79
 1 -1 -19 7.17 2.2
 -1 1 19 4.72 2.1
 1 1 -18 4.45 0.76
 1 -1 -18 2.25 1.28
 1 1 -18 2.72 0.96
 -1 1 18 2.05 1.28
 1 -1 -17 0.51 1.18
 1 1 -17 1.83 1.3
 1 1 -17 1.54 0.67
 -1 1 17 3.28 1.14
 1 1 -16 6.42 0.64
 1 1 -16 4.96 0.82
 1 -1 -16 5.23 1.73
 -1 1 16 9.77 1.2
 1 -1 -15 73.55 2.45
 1 1 -15 74.4 1.55
 1 1 -15 77.39 1.84
 -1 1 15 74.86 2.46
 1 1 -14 11.93 0.62
 1 1 -14 12.78 1.06
 1 -1 -14 13.65 1.4
 1 -1 -14 15.58 1.66
 -1 1 14 11.53 1.23
 -1 1 14 15.7 1.7
 1 -1 -13 -1.15 1.05
 1 -1 -13 0.18 0.81
 1 1 -13 -0.25 0.5
 1 1 -13 1.2 0.43
 -1 1 13 -1.42 0.9
 -1 1 13 -0.67 0.92
 1 1 -12 19.83 0.82
 1 -1 -12 17.78 1.32
 1 -1 -12 24.08 1.55
 1 1 -12 19.86 0.93
 -1 1 12 21.6 1.13
 -1 1 12 23.81 1.69
 1 1 -11 1.79 0.35
 1 -1 -11 1.87 0.67
 1 -1 -11 3.62 0.89
 1 1 -11 1.34 0.51
 -1 -1 11 1.45 0.88
 -1 1 11 4.38 1.16
 -1 1 11 -1.03 0.8
 1 1 -10 14.28 0.56
 1 -1 -10 17.78 0.83
 1 -1 -10 17.03 1.6
 -1 1 10 13.26 0.94
 -1 1 10 17.84 0.89
 -1 -1 10 13.35 1.01
 1 -1 -9 0.59 0.76
 1 1 -9 0.01 0.34
 1 1 -9 0.31 0.23
 1 -1 -9 -0.73 0.92
 -1 -1 9 1.63 1.09
 -1 1 9 -1.3 0.62
 -1 1 9 1.54 0.7
 1 -1 -8 -1.19 0.84
 1 -1 -8 -1.02 0.69
 1 1 -8 -0.03 0.28
 1 1 -8 -0.55 0.27
 -1 1 8 0.07 0.65
 -1 -1 8 0.23 0.64
 1 1 -7 2.53 0.23
 1 1 -7 2.37 0.13
 1 -1 -7 2.43 0.79
 1 -1 -7 2.01 0.67
 -1 1 7 2.39 0.54
 -1 -1 7 1.95 0.63
 -1 1 7 3.21 0.65
 1 1 -6 10.04 0.22
 1 -1 -6 8.96 0.7
 1 -1 -6 9 0.82
 -1 -1 6 9.69 0.23
 -1 1 6 10.09 0.99
 -1 1 6 8.76 0.57
 1 -1 -5 1.49 0.46
 1 -1 -5 2.95 0.57
 1 1 -5 2.08 0.15
 -1 1 5 3.31 0.46
 -1 1 5 2.54 0.54
 -1 -1 5 2.71 0.16
 1 1 -4 10.99 0.25
 1 -1 -4 7.54 0.77
 1 -1 -4 13.02 0.62
 -1 1 4 11.53 0.93
 -1 -1 4 11.41 0.23
 -1 1 4 10.06 0.78
 1 1 -3 2.01 0.23
 1 -1 -3 1.18 0.47
 1 -1 -3 2.42 0.38
 -1 -1 3 2.18 0.24
 -1 1 3 2.06 0.46
 1 -1 -2 14.83 0.53
 1 1 -2 14.67 0.29
 -1 1 2 12.51 0.57
 -1 -1 2 14.08 0.4
 1 1 -1 8.75 0.3
 1 -1 -1 10.62 0.44
 -1 1 1 9.72 0.69
 -1 -1 1 10.49 0.42
 1 1 1 85.59 1.26
 1 -1 1 84.08 1.41
 -1 -1 -1 87.57 1.29
 -1 1 -1 86.13 1.23
 1 1 2 9.36 0.47
 1 -1 2 8.17 0.35
 -1 -1 -2 6.32 0.45
 -1 1 -2 8.06 0.34
 1 1 3 13.2 0.59
 1 -1 3 13.29 0.39
 -1 -1 -3 14.45 0.59
 -1 1 -3 13.77 0.41
 1 -1 4 35.51 0.62
 1 1 4 34.84 0.87
 -1 -1 -4 37.3 0.93
 -1 -1 -4 35.42 0.66
 -1 1 -4 36.88 0.84
 1 1 5 23.91 0.45
 1 1 5 22.06 1.15
 1 -1 5 22.34 0.53
 -1 -1 -5 22.38 0.82
 -1 1 -5 23.1 0.54
 -1 -1 -5 21.73 0.45
 1 1 6 36.64 0.62
 1 -1 6 35.36 0.74
 1 1 6 33.88 1.02
 -1 -1 -6 35.62 1.56
 -1 -1 -6 34.99 0.6
 -1 1 -6 35.92 0.68
 1 1 7 1.22 0.37
 1 1 7 2.67 0.65
 1 -1 7 2.56 0.42
 -1 -1 -7 2.81 1.09
 -1 -1 -7 2.65 0.51
 -1 1 -7 1.07 0.41
 1 1 8 8.88 0.81
 1 1 8 10.74 0.5
 1 -1 8 8.9 0.85
 -1 1 -8 10.8 0.52
 -1 -1 -8 9.06 0.9
 -1 -1 -8 11.61 0.45
 1 1 9 22.75 1.01
 1 1 9 24.48 0.71
 1 -1 9 25.81 1.18
 -1 -1 -9 23.17 0.97
 -1 -1 -9 26.42 1.21
 -1 1 -9 22.48 1.03
 1 1 10 26.19 0.82
 1 -1 10 27.26 1.32
 1 1 10 27.53 1.16
 -1 -1 -10 26.16 1.06
 -1 -1 -10 25.78 1.35
 -1 1 -10 23.05 0.79
 1 1 11 21.43 1.11
 1 1 11 21.47 0.85
 1 -1 11 19.53 0.88
 -1 -1 -11 22.97 1.36
 -1 -1 -11 18.68 0.76
 -1 1 -11 21.4 0.78
 1 1 12 3.8 1.49
 1 -1 12 5.32 0.91
 1 1 12 3.99 0.69
 -1 -1 -12 7.28 1.15
 -1 1 -12 2.81 0.64
 -1 1 -12 4.06 0.98
 -1 -1 -12 3.37 1
 1 1 13 14.96 0.95
 1 1 13 17.66 1.27
 -1 1 -13 16.07 0.91
 -1 1 -13 15.61 1.31
 -1 -1 -13 17.73 0.92
 1 1 14 22.35 1.46
 1 1 14 22.5 1.75
 -1 -1 -14 21.91 1.61
 -1 1 -14 24.96 1.05
 -1 1 -14 21.85 1.62
 1 1 15 30.59 2.19
 1 1 15 34.07 1.7
 -1 1 -15 33.69 1.4
 -1 -1 -15 33.51 1.4
 -1 1 -15 30.8 1.29
 1 1 16 27.33 2.41
 1 1 16 28.36 2.3
 -1 1 -16 31.42 2.18
 -1 -1 -16 30.65 1.43
 -1 1 -16 29.01 1.33
 1 1 17 18.32 1.46
 -1 1 -17 10.48 1.1
 -1 1 -17 13.37 1.31
 -1 -1 -17 17.62 1.96
 1 1 18 0.89 1.28
 -1 1 -18 2.9 1.79
 -1 1 -18 0.12 1
 -1 -1 -18 1.23 1.11
 1 1 19 3.24 1.4
 -1 1 -19 3.08 1.09
 -1 -1 -19 2.69 1.24
 -1 -1 -20 3.8 1.77
 -1 -1 -20 2.12 1.33
 -1 1 -20 4.2 1.22
 -1 1 -21 18.48 2.39
 -1 -1 -21 19.03 2.35
 -1 -1 -22 4.78 2.12
 -1 1 -22 5.22 2.13
 -1 -1 -23 10.31 3.67
 -1 1 -23 2.68 2.15
 -1 -1 -24 3.58 2.32
 -1 1 -24 0.96 1.43
 -1 1 -25 -2.06 1.52
 -1 -1 -25 3.39 2.41
 -1 -1 -26 1.18 2.55
 -1 1 -26 0.38 1.5
 -1 -1 -27 4.59 3.73
 -1 1 -27 0.96 1.53
 -1 1 -28 5.77 2.51
 -1 -1 -28 2.2 2.54
 -1 -1 -29 0.42 2.4
 -1 -1 -30 -2.01 3.99
 -1 -1 -31 3.71 2.7
 -1 -1 -32 2.16 2.7
 1 -2 -32 19.03 5.98
 1 -2 -31 -6.28 3.47
 1 -2 -30 -6.42 3.35
 1 -2 -29 0.44 2.38
 -1 2 29 -0.82 2.44
 1 -2 -28 3.48 2.48
 -1 2 28 -0.45 2.39
 1 -2 -27 4.32 3.79
 -1 2 27 1.31 2.33
 1 -2 -26 1.18 2.22
 -1 2 26 2.1 3.83
 1 -2 -25 -2.15 2.19
 -1 2 25 1.85 2.27
 1 2 -24 4.85 0.99
 1 -2 -24 0.34 3.28
 -1 2 24 8.37 2.27
 1 2 -23 0.62 0.87
 1 -2 -23 0.51 1.87
 -1 2 23 3.42 3.14
 1 -2 -22 -0.7 1.74
 1 2 -22 0.6 0.83
 -1 2 22 4.74 1.91
 1 -2 -21 3.41 1.76
 1 2 -21 2.79 1.44
 1 2 -21 3.35 0.84
 -1 2 21 4.41 1.91
 1 -2 -20 11.7 1.78
 1 2 -20 11.38 0.91
 1 2 -20 9.37 0.99
 -1 2 20 12.5 2.02
 1 -2 -19 -0.57 1.46
 1 2 -19 1.73 0.69
 1 2 -19 1.61 1.19
 -1 2 19 2.99 1.62
 1 -2 -18 8.75 1.43
 1 2 -18 5.39 0.99
 1 2 -18 5.47 0.78
 -1 2 18 9.07 2.51
 1 2 -17 4.19 0.95
 1 2 -17 2.23 0.58
 1 -2 -17 0.47 1.22
 -1 2 17 2.5 1.48
 1 2 -16 81.42 2.04
 1 2 -16 74.55 2.07
 1 -2 -16 75.72 2.69
 -1 2 16 80.14 3.28
 1 2 -15 30.73 1.14
 1 2 -15 30.06 0.79
 1 -2 -15 33.44 1.61
 -1 2 15 28.08 3.09
 1 2 -14 6.43 0.74
 1 -2 -14 8.9 1.69
 1 2 -14 4.23 0.68
 -1 2 14 3.3 1.4
 1 2 -13 4.86 0.55
 1 2 -13 4.61 0.66
 1 -2 -13 6.56 1.02
 -1 2 13 5.59 1.19
 -1 2 13 8.67 2.03
 1 2 -12 41.43 1.02
 1 -2 -12 47.75 1.63
 -1 2 12 40.43 2.6
 -1 -2 12 45.31 1.1
 -1 2 12 39.58 2.04
 1 -2 -11 87.45 2.49
 1 2 -11 90.92 1.65
 -1 -2 11 91.34 1.61
 -1 2 11 94.55 2.94
 -1 2 11 86.52 2.73
 1 -2 -10 6.77 1.35
 1 2 -10 7.51 0.37
 -1 2 10 5.91 1.12
 -1 -2 10 6.69 0.53
 -1 2 10 6.07 1.56
 1 2 -9 9.95 0.58
 1 -2 -9 7.81 1.35
 1 -2 -9 8.58 1.33
 -1 2 9 11.28 1.19
 -1 -2 9 10.4 0.37
 1 2 -8 52.89 1.08
 1 -2 -8 51.48 2.02
 1 -2 -8 49.9 2.12
 -1 -2 8 56.17 1.05
 -1 2 8 46.45 1.86
 1 -2 -7 7.63 1.54
 1 2 -7 4.16 0.37
 1 -2 -7 4.07 0.75
 -1 -2 7 4.37 0.51
 -1 2 7 1.88 1.48
 1 2 -6 2.19 0.39
 1 -2 -6 4 0.7
 1 -2 -6 3.25 0.98
 -1 -2 6 3.03 0.34
 -1 2 6 4.01 0.89
 1 2 -5 82.63 1.34
 1 -2 -5 84.07 2.39
 -1 -2 5 83.13 1.62
 -1 2 5 80.46 2.35
 1 2 -4 153.22 2.59
 1 -2 -4 148.72 3.75
 -1 2 4 150 3.81
 -1 -2 4 149.64 2.91
 1 2 -3 1760.83 94.95
 1 -2 -3 1802.09 110.73
 -1 -2 3 1784.83 96.04
 -1 2 3 1790.52 104.56
 1 2 -2 607.13 16.92
 1 -2 -2 626.46 19.68
 -1 2 2 605.91 19.28
 -1 -2 2 599.26 18.59
 1 2 -1 298.57 7.2
 1 -2 -1 288.7 6.99
 -1 -2 1 300.31 7.37
 -1 2 1 281.64 6.99
 1 2 0 349.54 8.15
 1 -2 0 346.07 8.5
 -1 -2 0 349.92 8.41
 -1 2 0 347.56 9.67
 1 -2 1 51.81 1.23
 1 2 1 51.89 1.78
 -1 -2 -1 52.17 1.42
 -1 2 -1 47.55 1.86
 1 2 2 268.95 6.41
 1 -2 2 266.82 5.92
 -1 -2 -2 287.49 7.74
 -1 2 -2 276.93 6.07
 1 -2 3 280.19 6.6
 1 2 3 273.5 7.9
 -1 -2 -3 277.51 7.11
 -1 2 -3 281.36 6.15
 1 -2 4 44.5 1.05
 1 2 4 42.93 1.46
 -1 2 -4 46.86 1.12
 -1 -2 -4 44.08 1.55
 1 2 5 4.98 0.92
 1 -2 5 10.35 0.89
 -1 -2 -5 3.05 1.51
 -1 2 -5 7.54 0.62
 1 -2 6 10.45 0.6
 1 2 6 11.39 1.04
 -1 2 -6 9.39 0.63
 -1 -2 -6 11.24 0.63
 -1 -2 -6 9.63 1.13
 1 -2 7 2.46 0.8
 1 2 7 2.14 0.99
 -1 -2 -7 2.03 0.83
 -1 -2 -7 3.79 1.08
 -1 2 -7 2.49 0.52
 1 2 8 4.84 1.48
 1 -2 8 0.89 0.55
 -1 2 -8 1.54 0.53
 -1 -2 -8 1.92 1.12
 -1 -2 -8 0.73 0.54
 1 2 9 -2.02 1.01
 1 -2 9 1.27 0.84
 -1 -2 -9 0.83 0.57
 -1 2 -9 -0.16 0.56
 1 -2 10 0.31 0.91
 -1 -2 -10 1.25 0.91
 -1 2 -10 0.01 0.92
 1 2 11 24.34 2.3
 1 -2 11 20.47 0.9
 -1 -2 -11 22.15 1.36
 -1 2 -11 21.61 0.86
 1 2 12 5.41 1.21
 1 2 12 2.24 0.9
 1 -2 12 3.37 0.74
 -1 -2 -12 5.19 1.15
 -1 2 -12 5.27 1.02
 1 2 13 -2.34 1.24
 1 2 13 0.37 1.45
 1 -2 13 1.54 0.75
 -1 -2 -13 2.26 0.76
 -1 2 -13 0.9 0.65
 1 2 14 1.33 1.01
 1 2 14 0.7 1.27
 1 -2 14 0.81 0.84
 -1 2 -14 0.11 1.15
 -1 2 -14 0.34 1.1
 -1 -2 -14 2.45 0.82
 1 -2 15 17.79 1.19
 1 2 15 18.15 1.41
 1 2 15 18.33 1.72
 -1 -2 -15 22 1.8
 -1 2 -15 17.2 1.05
 1 2 16 1.08 1.75
 1 2 16 -0.59 1.42
 -1 -2 -16 1.11 0.96
 -1 2 -16 0.41 0.81
 -1 2 -16 0.31 0.85
 1 2 17 3.9 1.55
 -1 2 -17 3.99 1.42
 -1 2 -17 -0.67 1.47
 -1 -2 -17 1.35 1.09
 1 2 18 3.93 2.54
 -1 -2 -18 4.54 1.89
 -1 2 -18 3.74 1.57
 -1 2 -18 5.89 1.6
 1 2 19 4.6 1.83
 -1 2 -19 5 1.12
 -1 2 -19 7.19 1.63
 -1 -2 -19 5.94 1.37
 1 2 20 5.39 1.87
 -1 2 -20 -0.21 1.67
 -1 2 -20 4.49 1.75
 -1 -2 -20 -1.29 2.21
 1 2 21 -3.22 1.94
 -1 -2 -21 1.42 1.48
 -1 2 -21 0.18 1.09
 1 2 22 0.14 1.93
 -1 2 -22 1.13 1.17
 -1 -2 -22 1.2 1.48
 1 2 23 1.32 1.99
 -1 -2 -23 0.24 2.46
 -1 2 -23 0.75 1.22
 1 2 24 2.65 2.16
 -1 2 -24 2.19 1.28
 -1 -2 -24 -1 1.75
 1 2 25 0.7 2.33
 -1 2 -25 0.62 1.92
 -1 -2 -25 0.87 1.72
 -1 -2 -26 5.61 2.87
 -1 -2 -27 -0.92 2.83
 -1 -2 -28 4.87 4.82
 -1 -2 -29 3.76 3.32
 -1 -2 -30 6.19 3.68
 -1 -2 -31 5.5 3.69
 -1 -2 -32 -1.52 5
 -1 -2 -33 -1.74 3.36
 1 -3 -34 6.61 3.93
 1 -3 -33 -7.8 4.06
 -1 3 32 -1.75 3.11
 -1 3 31 1.29 2.99
 1 -3 -30 0.42 3.73
 -1 3 30 -0.65 2.77
 1 -3 -29 0.75 2.49
 -1 3 29 -0.71 4.59
 1 -3 -28 4.73 2.49
 -1 3 28 2.16 3.08
 1 -3 -27 4.35 2.52
 -1 3 27 5.38 2.91
 1 -3 -26 -2.84 2.32
 -1 3 26 4.62 4.18
 1 -3 -25 0.6 2.2
 -1 3 25 0.59 2.57
 1 -3 -24 3.75 2.24
 -1 3 24 3.97 2.6
 1 -3 -23 8.72 3.5
 -1 3 23 7.62 4.1
 1 -3 -22 10.19 2.03
 -1 3 22 3.48 2.57
 1 3 -21 -0.63 1.04
 1 -3 -21 8.15 2.6
 -1 3 21 -0.02 2.15
 1 3 -20 1.2 1
 1 -3 -20 -1.02 1.65
 -1 3 20 1.68 3.18
 1 3 -19 2.88 0.59
 1 3 -19 3.2 0.7
 1 -3 -19 6.3 1.62
 -1 3 19 4.4 2.11
 1 3 -18 1.26 0.56
 1 3 -18 1.11 1.02
 1 -3 -18 7.17 1.47
 -1 3 18 3.93 1.97
 1 3 -17 1.82 0.81
 1 3 -17 0.47 0.65
 1 -3 -17 -0.94 1.41
 -1 3 17 3.31 1.92
 1 -3 -16 0.92 2.09
 1 3 -16 -0.18 0.45
 1 3 -16 2.25 0.94
 -1 3 16 1.33 1.86
 -1 -3 16 3.33 0.86
 1 -3 -15 12.32 1.5
 -1 3 15 6.58 1.97
 -1 -3 15 11.07 0.95
 1 3 -14 4.62 1
 1 -3 -14 5.54 1.31
 -1 -3 14 4.74 0.87
 -1 3 14 6.81 1.77
 1 3 -13 25.1 0.89
 1 -3 -13 25.23 1.66
 -1 3 13 29.71 2.11
 -1 -3 13 23.31 0.81
 1 3 -12 3.95 0.95
 1 -3 -12 2.13 1.77
 -1 -3 12 3.59 0.57
 -1 3 12 5.87 2.35
 1 -3 -11 4.64 1.16
 1 3 -11 4.15 0.96
 -1 3 11 3.74 1.57
 -1 -3 11 4.1 0.85
 1 3 -10 12.16 0.77
 1 -3 -10 18.55 1.3
 -1 3 10 16.73 1.72
 -1 -3 10 15.06 0.96
 1 -3 -9 -1.04 1.01
 1 3 -9 -0.03 0.9
 -1 -3 9 0.68 0.83
 -1 3 9 4.99 1.38
 1 -3 -8 10.21 1.23
 1 3 -8 9.15 0.75
 -1 -3 8 13.27 0.72
 -1 3 8 11.49 1.59
 1 3 -7 5.79 1.05
 -1 3 7 3.21 2.1
 -1 -3 7 6.81 1.02
 1 3 -6 0.35 0.7
 -1 3 6 1.04 1.31
 -1 -3 6 1.63 0.65
 1 3 -5 23.74 1.56
 -1 -3 5 23.81 1.47
 -1 3 5 21.59 2.39
 1 3 -4 18.76 1.03
 -1 -3 4 22.09 1.48
 -1 3 4 18.91 1.56
 1 3 -3 19.84 1.54
 1 -3 -3 18.04 1.44
 -1 -3 3 17.93 1.57
 -1 3 3 23.61 2.25
 1 3 -2 2.16 0.83
 -1 -3 2 1.1 1.28
 -1 3 2 1.4 1.09
 1 -3 -1 12.7 1.21
 1 3 -1 15.47 1.02
 -1 3 1 17.04 1.9
 -1 -3 1 14.35 1.12
 1 3 0 16.29 1.15
 1 -3 0 20.09 1.25
 -1 3 0 19.23 1.24
 -1 -3 0 17.59 1.22
 1 3 1 42.96 1.68
 1 -3 1 47.04 2.4
 -1 -3 -1 45.25 1.81
 -1 3 -1 42.27 2.46
 1 -3 2 80.76 2.32
 1 3 2 75.2 3.34
 -1 -3 -2 78.32 2.71
 -1 3 -2 77.6 2.37
 1 3 3 6.35 1.22
 1 -3 3 11.07 1.01
 -1 -3 -3 9.38 1.36
 -1 3 -3 9.88 1.06
 1 3 4 17.88 1.51
 1 -3 4 24.99 1.17
 -1 3 -4 22.27 1.24
 1 -3 5 29.85 1.23
 1 3 5 33.68 2.42
 -1 3 -5 28.41 1.26
 1 3 6 4.44 1.19
 1 -3 6 -0.51 0.77
 -1 3 -6 0.54 1.29
 1 3 7 -0.08 1.29
 1 -3 7 2.09 1.22
 -1 3 -7 1.85 0.83
 1 -3 8 16.15 1.44
 1 3 8 13.95 2.42
 -1 3 -8 17.63 1.07
 -1 -3 -8 16.09 1.08
 1 -3 9 3.07 0.81
 1 3 9 3.15 1.47
 -1 3 -9 1.91 0.83
 -1 -3 -9 1.36 0.86
 1 -3 10 1.56 0.82
 1 3 10 2.2 1.45
 -1 -3 -10 0.78 0.85
 -1 3 -10 2.2 0.85
 1 -3 11 2.28 0.86
 1 3 11 -1.12 2.35
 -1 -3 -11 1.39 0.97
 -1 3 -11 4.61 0.87
 1 -3 12 10.35 1.47
 1 3 12 6.46 1.67
 -1 -3 -12 7.03 1.07
 -1 3 -12 8.89 0.96
 1 3 13 1.58 1.6
 1 -3 13 1.54 1.35
 -1 -3 -13 2.11 0.97
 -1 3 -13 -0.78 0.91
 1 3 14 30.87 2.4
 1 -3 14 26.99 2.04
 -1 3 -14 25.24 1.98
 -1 -3 -14 29.34 1.56
 1 3 15 3.17 1.79
 1 -3 15 3.15 1.03
 -1 -3 -15 3.73 1.15
 -1 3 -15 3.66 0.99
 1 3 16 4.78 1.93
 1 -3 16 4.7 1
 -1 3 -16 3.86 1.57
 -1 -3 -16 5.4 1.79
 1 3 17 4.8 2.07
 1 -3 17 5.37 1.17
 -1 -3 -17 8.37 1.31
 -1 3 -17 7.19 1.76
 1 3 18 8.88 3.26
 1 -3 18 4.63 1.7
 -1 -3 -18 3.61 1.38
 -1 3 -18 5.5 1.15
 1 3 19 7.8 2.34
 -1 3 -19 9.36 1.27
 -1 -3 -19 10.59 2.47
 -1 3 -19 7.84 1.02
 1 3 20 10.41 2.46
 -1 -3 -20 8 1.68
 -1 3 -20 8.04 1.31
 1 3 21 8.74 2.51
 -1 -3 -21 7.2 1.82
 -1 3 -21 11.58 2.1
 1 3 22 16.55 4.41
 -1 3 -22 12.54 2.28
 -1 -3 -22 15.88 2.03
 1 3 23 1.73 2.46
 -1 3 -23 0.67 1.88
 -1 -3 -23 2.32 1.81
 1 3 24 1.26 2.59
 -1 -3 -24 2.97 1.8
 1 3 25 1.49 4.31
 -1 -3 -25 1.81 1.72
 1 3 26 -0.16 2.53
 -1 -3 -26 1.34 1.76
 1 3 27 -1.76 2.64
 -1 -3 -27 -0.41 1.89
 1 3 28 3.76 2.99
 1 3 29 3.31 2.95
 -1 -3 -30 -2.01 3.54
 -1 -3 -31 9.76 4
 -1 -3 -32 3.21 5.85
 -1 -3 -33 -8.78 4.52
 -1 4 32 4.17 5.35
 -1 4 31 4.18 3.73
 -1 4 30 3.19 3.5
 -1 4 29 0.02 3.19
 1 -4 -28 -0.12 3.91
 -1 4 28 3.14 4.78
 1 -4 -27 3.29 2.4
 -1 4 27 2.75 3.19
 1 -4 -26 3.27 3.58
 -1 4 26 1.1 3.13
 1 -4 -25 5.73 2.42
 -1 4 25 7.53 5.02
 1 -4 -24 -1.43 3.36
 -1 4 24 3.26 2.96
 1 -4 -23 -0.96 2.08
 -1 4 23 1 2.84
 1 -4 -22 -1.26 3.15
 -1 4 22 -2.25 4.1
 1 -4 -21 2.19 1.96
 -1 4 21 -0.38 2.72
 1 -4 -20 2.21 1.93
 -1 4 20 -1.95 2.57
 1 -4 -19 16.85 3.19
 1 4 -19 7.3 1.17
 -1 4 19 10.15 2.72
 1 -4 -18 6.75 1.9
 1 4 -18 3.33 1.11
 -1 4 18 2.49 2.58
 1 4 -17 -1.22 1.12
 1 -4 -17 4.46 2.65
 -1 -4 17 2.37 1.04
 -1 4 17 2.32 2.41
 1 -4 -16 3.29 1.6
 1 4 -16 1.64 1.17
 -1 -4 16 -1.52 1.01
 -1 4 16 3.12 2.18
 1 -4 -15 -0.92 1.6
 1 4 -15 -0.1 1.23
 -1 -4 15 0.84 0.72
 -1 4 15 0.9 2.14
 1 -4 -14 -0.77 2.39
 1 4 -14 2.98 0.84
 -1 -4 14 3.98 1.26
 -1 4 14 1.47 2.19
 1 4 -13 -0.46 0.82
 1 -4 -13 -0.98 1.54
 -1 -4 13 0.63 0.78
 -1 4 13 -0.92 1.99
 1 -4 -12 3.35 1.4
 1 4 -12 -2.13 1.38
 -1 -4 12 0.4 0.88
 -1 4 12 -0.32 1.9
 1 -4 -11 19.08 1.94
 1 4 -11 21.18 1.83
 -1 -4 11 19.38 1.19
 -1 4 11 19.06 2.37
 1 -4 -10 8.56 2.44
 1 4 -10 9.26 1.08
 -1 4 10 8.72 2.06
 -1 -4 10 7.87 1.04
 1 4 -9 0.39 1.02
 1 -4 -9 2.13 1.42
 -1 4 9 1.13 1.83
 -1 -4 9 1.58 0.92
 1 4 -8 86.48 3.53
 -1 -4 8 68.62 3.26
 -1 4 8 77.33 4.03
 1 4 -7 5.91 1.07
 -1 -4 7 4.59 1.64
 -1 4 7 3.68 1.79
 1 4 -6 30.75 1.62
 -1 -4 6 27.05 2.36
 -1 4 6 27.2 2.33
 1 4 -5 18.82 2.23
 -1 -4 5 21.72 2.24
 -1 4 5 23.98 2.07
 1 4 -4 -0.16 1.07
 -1 -4 4 -0.77 1.14
 -1 4 4 1.68 2.21
 1 4 -3 255.12 7.94
 -1 4 3 267.78 10.07
 1 4 -2 126.54 4.03
 -1 4 2 127.99 4.94
 1 4 -1 4.2 1.94
 -1 4 1 6.03 2.37
 1 4 0 24.57 1.68
 -1 4 0 25.15 2.01
 1 4 1 55.65 2.56
 -1 4 -1 58.96 2.81
 1 4 2 2.36 2.04
 -1 4 -2 0.12 1.32
 1 4 3 186.96 6.52
 -1 4 -3 192.89 6.39
 1 4 4 155.55 5.52
 -1 4 -4 157.04 6.87
 1 4 5 -0.77 1.51
 -1 4 -5 1.86 1.28
 1 4 6 3.9 2.4
 -1 4 -6 2.3 1.31
 1 4 7 30.5 2.34
 -1 4 -7 31.7 1.91
 1 -4 8 23.35 1.58
 1 4 8 21.94 2.32
 -1 4 -8 22.98 1.69
 1 4 9 3.02 2.86
 1 -4 9 4.96 1.2
 -1 4 -9 0.83 1.94
 1 4 10 4.9 2.06
 1 -4 10 6.86 1.18
 -1 4 -10 9.45 1.38
 -1 -4 -10 9.75 1.4
 1 -4 11 22.61 1.64
 1 4 11 20.35 2.55
 -1 -4 -11 27.28 1.75
 -1 4 -11 24.89 1.78
 1 -4 12 1.64 1.17
 1 4 12 2.77 2.1
 -1 -4 -12 5.43 1.32
 -1 4 -12 10.86 1.98
 1 -4 13 2.13 1.16
 1 4 13 2.72 3.04
 -1 -4 -13 2.61 1.39
 -1 4 -13 2.2 1.3
 1 -4 14 1.18 1.16
 1 4 14 5.35 2.15
 -1 -4 -14 4.22 1.41
 -1 4 -14 4.62 1.32
 1 4 15 7.51 2.35
 1 -4 15 6.8 1.26
 -1 -4 -15 5.74 2.31
 -1 4 -15 8.89 1.4
 1 -4 16 1.06 1.11
 1 4 16 2.24 2.22
 -1 -4 -16 1.78 2.23
 -1 4 -16 -1.25 1.99
 1 -4 17 7.25 1.24
 1 4 17 13.28 3.78
 -1 4 -17 3.99 1.44
 -1 -4 -17 6.76 1.65
 1 4 18 8.31 2.64
 -1 4 -18 6.14 1.54
 -1 -4 -18 8.89 1.71
 1 4 19 3.03 2.76
 -1 4 -19 9.15 1.62
 -1 -4 -19 11.27 2.71
 1 4 20 8.55 4.09
 -1 -4 -20 3.14 1.68
 -1 4 -20 1.31 1.44
 1 4 21 8.05 2.99
 -1 4 -21 3.12 2.37
 -1 -4 -21 9.97 1.9
 1 4 22 1.41 2.71
 -1 -4 -22 -0.5 2.75
 1 4 23 5.91 2.83
 -1 -4 -23 -0.77 1.83
 1 4 24 8.14 4.67
 -1 -4 -24 0.52 1.92
 1 4 25 2.82 3.05
 -1 -4 -25 0.39 1.97
 1 4 26 -1.54 3.12
 1 4 27 1.74 3.29
 1 4 28 0.37 4.61
 1 4 29 4.87 3.36
 1 4 30 0.75 3.23
 1 4 31 -0.82 3.35
 -1 -4 -32 -1.6 4.01
 -1 5 30 -4.1 5.99
 -1 5 29 -0.81 3.62
 -1 5 28 5.1 3.69
 -1 5 27 5.89 3.73
 1 -5 -26 -0.37 2.55
 -1 5 26 6.77 5.32
 1 -5 -25 0.46 2.27
 -1 5 25 1.03 3.27
 1 -5 -24 3.73 2.24
 -1 5 24 -4.16 3.27
 1 -5 -23 0.81 2.16
 -1 5 23 3.72 4.96
 1 -5 -22 0.29 2.25
 -1 5 22 2.42 3.18
 1 -5 -21 1.73 3.43
 -1 5 21 2.71 3.21
 1 -5 -20 2.9 2.26
 -1 5 20 -4.84 3.01
 1 -5 -19 4.52 3.59
 -1 5 19 7.81 5.08
 1 -5 -18 -0.14 2.14
 -1 5 18 2.3 3.04
 1 5 -17 1.35 1.11
 1 -5 -17 6.87 2.15
 -1 5 17 0.13 2.98
 1 5 -16 -0.13 1.12
 1 -5 -16 2.2 3.15
 -1 5 16 1.29 4.18
 1 5 -15 0.19 1.17
 1 -5 -15 4.05 2.08
 -1 5 15 4.63 2.67
 1 -5 -14 4.04 1.95
 1 5 -14 0.61 1.22
 -1 5 14 0.97 2.6
 1 5 -13 4.79 1.29
 1 -5 -13 4.11 3.03
 -1 -5 13 5.27 1.17
 -1 5 13 1.69 2.66
 1 5 -12 3.33 1.27
 1 -5 -12 1.31 1.92
 -1 -5 12 0.05 1.15
 -1 5 12 3.55 2.44
 1 5 -11 1.78 1.34
 1 -5 -11 0.17 1.96
 -1 5 11 0.23 2.42
 1 -5 -10 0.65 2.89
 1 5 -10 0.6 2.04
 -1 5 10 -1.59 2.19
 1 5 -9 -2.75 2.13
 -1 5 9 2.54 3.47
 1 5 -8 -1.13 2.11
 -1 5 8 4.24 2.21
 1 5 -7 4.56 1.5
 -1 5 7 3.86 2.19
 1 5 -6 -0.22 1.39
 -1 5 6 -3.61 2.09
 1 5 -5 3.47 1.49
 -1 5 5 -3.09 2.1
 1 5 -4 1.93 2.35
 -1 5 4 2.01 2
 1 5 -3 5.07 2.53
 -1 5 3 6.89 2.13
 1 5 -2 1.07 1.63
 1 5 -1 3.21 1.68
 -1 5 1 0.81 1.98
 1 5 0 1.62 1.79
 -1 5 0 7.06 2
 1 5 1 2.39 2.7
 -1 5 -1 0.97 1.9
 1 5 2 7.29 1.91
 -1 5 -2 4.1 1.99
 1 5 3 0.84 1.86
 -1 5 -3 2.4 1.9
 1 5 4 19.87 2.58
 -1 5 -4 23.15 2.42
 1 5 5 1.46 1.99
 -1 5 -5 1.18 2.78
 1 5 6 1.54 2.06
 -1 5 -6 8.47 1.86
 1 5 7 0.57 2.15
 -1 5 -7 4.72 1.78
 1 5 8 0.91 2.18
 1 5 9 1.5 2.32
 -1 5 -9 8.4 2.7
 1 5 10 1.5 3.52
 -1 5 -10 1.3 1.75
 1 5 11 5.23 2.45
 -1 -5 -11 3.54 1.76
 -1 5 -11 -2.02 1.77
 1 5 12 7.64 2.77
 -1 -5 -12 8.78 1.93
 -1 5 -12 6.57 1.9
 1 5 13 -0.89 2.53
 -1 -5 -13 1.24 1.65
 -1 5 -13 -2.93 1.75
 1 5 14 8.57 4.09
 -1 -5 -14 5.26 2.75
 -1 5 -14 -0.14 2.84
 1 5 15 22.53 3.45
 -1 -5 -15 25.75 2.46
 -1 5 -15 23.15 3.49
 1 5 16 4.34 2.81
 -1 5 -16 5.39 1.84
 -1 -5 -16 2.45 1.88
 1 5 17 0.25 2.81
 -1 5 -17 -0.71 1.66
 -1 -5 -17 2.26 1.75
 1 5 18 6.12 4.39
 -1 5 -18 0.23 1.63
 -1 -5 -18 4.37 2.77
 1 5 19 12.16 3.25
 -1 -5 -19 7.05 2.08
 1 5 20 3.8 3.09
 -1 -5 -20 2.59 1.91
 1 5 21 6.5 3.24
 -1 -5 -21 0.06 3.03
 1 5 22 2.56 4.82
 -1 -5 -22 1.79 1.88
 1 5 23 3.4 3.33
 1 5 24 3.05 3.43
 1 5 25 4.89 3.55
 1 5 26 3.66 5.47
 1 5 27 2.43 3.56
 1 5 28 -3.9 3.8
 1 5 29 -0.83 3.73
 1 5 30 -1.52 3.58
 -1 6 28 -2.1 4.08
 -1 6 27 1.59 5.99
 -1 6 26 -2.51 3.9
 -1 6 25 -6.98 4.13
 -1 6 24 4.6 3.81
 1 -6 -23 2.24 2.5
 -1 6 23 7.76 5.84
 1 -6 -22 -1.19 2.48
 -1 6 22 -1.73 3.58
 1 -6 -21 -0.1 2.4
 -1 6 21 -1.56 3.46
 1 -6 -20 2.41 2.42
 -1 6 20 -3.36 3.53
 1 -6 -19 11.15 4.16
 -1 6 19 10.82 4.1
 1 -6 -18 1.74 2.45
 -1 6 18 1.7 3.65
 1 -6 -17 6.45 3.87
 -1 6 17 0.99 3.65
 1 -6 -16 3.9 2.7
 -1 6 16 4.43 3.46
 1 6 -15 -2.91 2.34
 1 -6 -15 4.58 2.35
 -1 6 15 -3.57 3.19
 1 6 -14 0.1 2.39
 1 -6 -14 2.29 3.71
 -1 6 14 -1.79 3.16
 1 6 -13 5.95 2.61
 1 -6 -13 -0.33 2.62
 -1 6 13 6.41 3.12
 1 6 -12 0.64 2.65
 1 -6 -12 1.64 3.82
 -1 6 12 2.78 3.09
 1 6 -11 3.61 2.68
 1 -6 -11 0.84 2.53
 -1 6 11 5.78 3.06
 1 6 -10 -1.32 2.62
 -1 6 10 0.13 2.77
 1 6 -9 -1.66 2.73
 -1 6 9 3.48 2.76
 1 6 -8 11.72 3.2
 -1 6 8 9.11 3.18
 1 6 -7 4.2 2.01
 -1 6 7 6.72 2.96
 1 6 -6 0.16 1.93
 -1 6 6 3.39 2.78
 1 6 -5 4.48 2.07
 -1 6 5 4.42 2.75
 1 6 -4 -0.26 1.98
 -1 6 4 1.09 2.61
 1 6 -3 1.82 2.05
 -1 6 3 2.21 4.08
 1 6 -2 2.6 3.28
 -1 6 2 4.01 2.51
 1 6 -1 6.68 3.46
 -1 6 1 3.38 2.47
 1 6 0 3.69 2.29
 -1 6 0 4.95 2.51
 1 6 1 3.25 2.32
 -1 6 -1 -0.62 3.64
 1 6 2 1.4 2.31
 -1 6 -2 1.85 2.43
 1 6 3 74.89 5.17
 -1 6 -3 79.62 5.24
 1 6 4 15.69 4.44
 -1 6 -4 12.4 2.88
 1 6 5 1.51 2.42
 -1 6 -5 2.46 2.4
 1 6 6 8.55 2.84
 -1 6 -6 9.66 4.04
 1 6 7 24.29 3.42
 -1 6 -7 16.1 4.54
 1 6 8 5.38 2.83
 -1 6 -8 3.58 2.45
 1 6 9 2.16 4.39
 -1 6 -9 2.37 2.29
 1 6 10 5.06 2.94
 -1 6 -10 0.34 2.27
 1 6 11 4.2 3.07
 -1 -6 -11 3.19 2.33
 -1 6 -11 2.51 2.29
 1 6 12 2.77 3.44
 -1 -6 -12 7.03 3.78
 -1 6 -12 9.64 2.41
 1 6 13 6.76 3.1
 -1 -6 -13 -2.59 2.24
 -1 6 -13 3.93 3.28
 1 6 14 2.79 4.77
 -1 6 -14 -0.49 3.13
 -1 -6 -14 4 2.19
 1 6 15 11.61 3.48
 -1 -6 -15 9.2 3.72
 -1 6 -15 8.03 3.28
 1 6 16 8.21 3.35
 -1 -6 -16 1.69 2.33
 -1 6 -16 3.83 2.86
 1 6 17 1.19 3.44
 -1 -6 -17 3.32 2.11
 1 6 18 16.83 5.48
 -1 -6 -18 -0.53 3.39
 1 6 19 3.34 3.41
 -1 -6 -19 -1.03 2
 1 6 20 1.91 3.39
 -1 -6 -20 1.73 2.16
 1 6 21 -1.94 3.58
 1 6 22 1.08 3.6
 1 6 23 -4.81 5.68
 1 6 24 4.38 3.83
 1 6 25 -3.36 3.84
 1 6 26 0.44 3.77
 1 6 27 8.39 6.48
 -1 7 24 10.03 4.59
 -1 7 23 -3.78 6.74
 -1 7 22 5.35 4.26
 1 -7 -21 0.23 2.9
 -1 7 21 8.74 4.1
 1 -7 -20 0.56 4.2
 -1 7 20 5.98 3.96
 1 -7 -19 1.6 2.73
 -1 7 19 5.24 5.94
 1 -7 -18 1.46 4.25
 -1 7 18 0.45 3.98
 1 -7 -17 3.55 2.96
 -1 7 17 6.15 3.93
 1 -7 -16 3.33 4.33
 -1 7 16 2.51 4.07
 1 -7 -15 -1.3 2.8
 -1 7 15 -3.18 5.74
 1 -7 -14 -5.26 2.96
 -1 7 14 2.68 3.8
 1 -7 -13 5.74 3.02
 -1 7 13 1.65 3.74
 1 7 -12 1.18 3.17
 1 -7 -12 -1.09 3.06
 -1 7 12 -6.26 3.73
 1 7 -11 -0.99 3.26
 1 -7 -11 2.13 3.12
 -1 7 11 0.37 3.54
 1 7 -10 6.06 3.58
 -1 7 10 2.53 5.85
 1 7 -9 0.24 3.49
 -1 7 9 4.24 3.6
 1 7 -8 4.24 3.85
 -1 7 8 10.69 3.71
 1 7 -7 3.4 3.7
 -1 7 7 5.86 3.61
 1 7 -6 6.49 3.96
 -1 7 6 6.56 3.54
 1 7 -5 -0.61 2.45
 -1 7 5 8.29 5.08
 1 7 -4 -4.98 2.65
 -1 7 4 1.77 3.3
 1 7 -3 0.77 2.57
 -1 7 3 -0.49 3.17
 1 7 -2 2.69 2.76
 -1 7 2 1.73 3.17
 1 7 -1 -1.28 2.73
 -1 7 1 3.57 3.09
 1 7 0 -0.81 2.86
 -1 7 0 7.4 4.68
 1 7 1 4.17 4.42
 -1 7 -1 -6.75 4.63
 1 7 2 10.06 4.56
 -1 7 -2 0.16 3.04
 1 7 3 -1.71 2.95
 -1 7 -3 -5.19 3.11
 1 7 4 5.2 3.03
 -1 7 -4 -2.44 3
 1 7 5 2.93 3.15
 -1 7 -5 -5.55 2.92
 1 7 6 -0.24 3.21
 -1 7 -6 2.69 2.84
 1 7 7 2.56 3.22
 -1 7 -7 6.27 4.37
 1 7 8 3.69 5.41
 -1 7 -8 6.96 4.54
 1 7 9 1.92 3.46
 -1 7 -9 6.58 4.29
 1 7 10 -2.81 3.54
 -1 7 -10 0.53 2.49
 1 7 11 2.74 3.53
 -1 7 -11 2.53 2.57
 -1 -7 -11 -1.07 4.11
 1 7 12 8.03 3.91
 -1 7 -12 5.05 2.54
 -1 -7 -12 4.25 2.8
 1 7 13 0.12 5.6
 -1 7 -13 1.61 2.26
 -1 -7 -13 -0.1 2.49
 1 7 14 -0.3 3.64
 -1 -7 -14 5.17 3.93
 1 7 15 2.29 3.65
 -1 -7 -15 3.86 2.53
 1 7 16 3.4 3.92
 -1 -7 -16 9.18 4.06
 1 7 17 5.86 3.76
 -1 -7 -17 1.28 2.5
 1 7 18 2.7 5.91
 1 7 19 1.93 3.77
 1 7 20 1.6 3.76
 1 7 21 2.93 4.08
 1 7 22 -0.73 3.95
 1 7 23 -9.31 6.73
 1 7 24 6.16 4.28
 -1 8 20 4.08 4.59
 -1 8 19 -3.88 4.35
 1 -8 -18 0.5 3.34
 -1 8 18 3.64 6.75
 1 -8 -17 -1.4 2.95
 -1 8 17 1.96 4.31
 1 -8 -16 -1.08 3.04
 -1 8 16 1.41 4.27
 1 -8 -15 5.34 3.18
 -1 8 15 1.53 4.39
 1 -8 -14 0.63 3.12
 -1 8 14 -1.63 4.23
 1 -8 -13 1 3.19
 -1 8 13 -5.74 6.32
 1 -8 -12 -1.15 3.37
 -1 8 12 -0.45 4.01
 1 -8 -11 -0.11 3.41
 -1 8 11 5.15 4
 -1 8 10 4.63 4.15
 1 8 -9 -0.78 2.63
 -1 8 9 -1.41 3.98
 1 8 -8 -1.29 2.6
 -1 8 8 10.16 5.89
 1 8 -7 0 2.67
 -1 8 7 3.77 5.92
 1 8 -6 5.03 4.29
 -1 8 6 0.88 3.9
 1 8 -5 5 4.45
 -1 8 5 -6.15 3.74
 1 8 -4 -1.52 4.58
 -1 8 4 3.55 3.86
 1 8 -3 10.3 4.76
 -1 8 3 -1.44 3.93
 1 8 -2 6.49 3.41
 -1 8 2 8.85 4
 1 8 -1 2.21 3.11
 -1 8 1 -1.59 5.67
 1 8 0 5.42 3.35
 -1 8 0 1.96 3.82
 1 8 1 2.15 3.44
 -1 8 -1 4.6 3.72
 1 8 2 3.26 3.41
 -1 8 -2 -0.77 3.57
 1 8 3 -1.68 3.61
 -1 8 -3 7.16 3.72
 1 8 4 6.84 3.64
 -1 8 -4 -2.05 3.41
 1 8 5 1.2 5.63
 -1 8 -5 2.37 3.45
 1 8 6 3.5 5.73
 -1 8 -6 1.46 3.27
 1 8 7 9.69 4.08
 -1 8 -7 -3.83 4.98
 1 8 8 -2.09 3.85
 -1 8 -8 1.8 4.56
 1 8 9 4.92 4.18
 -1 8 -9 5.96 4.79
 1 8 10 10.14 4.29
 -1 8 -10 0.8 4.61
 1 8 11 -0.57 3.89
 -1 -8 -11 1.79 4.62
 1 8 12 1.39 5.94
 -1 -8 -12 1.66 3.03
 1 8 13 1.11 3.99
 -1 -8 -13 3.22 2.95
 1 8 14 8.59 4.02
 -1 -8 -14 -1.7 2.86
 1 8 15 10.31 4.54
 1 8 16 0.65 4.04
 1 8 17 -0.91 6.32
 1 8 18 5.44 4.41
 1 8 19 -2.55 4.4
 1 -9 -13 5.81 3.83
 -1 9 13 3.38 4.91
 1 -9 -12 -1.3 3.77
 -1 9 12 -1.26 4.72
 1 -9 -11 3.9 3.86
 -1 9 11 -0.46 4.71
 -1 9 10 3.04 7.2
 -1 9 9 3.97 4.64
 -1 9 8 3.21 4.36
 -1 9 7 1.15 4.27
 1 9 -6 0.28 3.18
 -1 9 6 3.49 4.31
 1 9 -5 7.85 3.46
 -1 9 5 0.74 4.61
 1 9 -4 2.8 3.37
 -1 9 4 3.16 6.54
 1 9 -3 -2.83 3.4
 -1 9 3 1.46 6.6
 1 9 -2 0.37 3.49
 -1 9 2 3.43 4.27
 1 9 -1 -3.45 5.6
 -1 9 1 1.36 4.08
 1 9 0 -1.09 5.88
 -1 9 0 -2.08 4.21
 1 9 1 2 6.1
 -1 9 -1 3.78 4.07
 1 9 2 4.81 3.95
 -1 9 -2 -2.13 4.02
 1 9 3 1.75 3.97
 -1 9 -3 0.04 3.83
 1 9 4 -0.22 4.1
 -1 9 -4 3.32 3.8
 1 9 5 4.12 4.26
 -1 9 -5 1.11 3.73
 1 9 6 3.55 4.3
 -1 9 -6 0.53 3.52
 1 9 7 0.02 4.24
 -1 9 -7 -0.05 5.26
 1 9 8 1.1 4.34
 1 9 9 8.99 7.19
 1 9 9 3.94 7.35
 1 9 10 0.09 4.21
 1 9 11 2.2 4.48
 -1 -9 -11 3.7 3.62
 1 9 12 1.84 4.48
 2 0 -28 -0.24 1.52
 2 0 -27 -0.62 1.51
 2 0 -26 14.47 2.8
 2 0 -25 -3.94 1.63
 2 0 -24 44.01 2.59
 2 0 -23 0.98 2.18
 2 0 -22 5.49 1.38
 2 0 -21 5.03 1.67
 2 0 -21 2.65 1.21
 -2 0 21 0.77 1.05
 2 0 -20 54.13 2.82
 -2 0 20 51.62 1.94
 2 0 -19 -4.02 1.44
 2 0 -19 2.2 1.28
 -2 0 19 0.73 0.91
 2 0 -18 39.87 2.16
 2 0 -18 38.65 2.03
 -2 0 18 41.92 2.35
 2 0 -17 2.11 1.86
 2 0 -17 2.24 1.07
 -2 0 17 -0.65 0.85
 2 0 -16 5.44 1.08
 2 0 -16 6.7 1.26
 -2 0 16 9.1 1.29
 2 0 -15 -2.1 1.06
 2 0 -15 -1.49 0.88
 -2 0 15 1.25 0.68
 2 0 -14 448.76 14.66
 2 0 -14 457.19 13.77
 -2 0 14 465.12 13.95
 2 0 -13 1.14 0.69
 2 0 -13 -1.96 1.37
 -2 0 13 0.75 0.56
 2 0 -12 59.6 1.8
 2 0 -12 65.77 2.06
 -2 0 12 59.33 1.89
 -2 0 12 61.88 1.33
 2 0 -11 -1.55 0.88
 2 0 -11 0.44 0.74
 -2 0 11 0.75 0.73
 -2 0 11 0.65 0.76
 2 0 -10 4.48 1.19
 2 0 -10 8.31 0.59
 -2 0 10 6.37 0.51
 -2 0 10 8.48 0.78
 2 0 -9 -0.88 0.63
 2 0 -9 1.03 0.67
 -2 0 9 1.47 0.61
 -2 0 9 -0.47 0.4
 2 0 -8 22.24 0.59
 2 0 -8 22.89 0.84
 -2 0 8 19.6 0.81
 -2 0 8 22.8 0.82
 2 0 -7 0.2 0.34
 2 0 -7 -0.71 0.81
 -2 0 7 1.65 0.5
 -2 0 7 -0.46 0.32
 2 0 -6 12.9 0.61
 2 0 -6 14.39 0.55
 -2 0 6 12.34 0.41
 -2 0 6 14.04 0.61
 2 0 -5 0.21 0.4
 2 0 -5 -0.29 0.37
 -2 0 5 0.8 0.4
 -2 0 5 -0.43 0.26
 2 0 -4 55.49 0.88
 2 0 -4 55.94 0.67
 -2 0 4 58.62 0.92
 -2 0 4 56.06 0.73
 2 0 2 28.33 0.58
 -2 0 -2 25.55 0.77
 2 0 3 0.5 0.36
 -2 0 -3 -0.99 0.58
 2 0 4 7.98 0.54
 -2 0 -4 7.37 0.52
 2 0 5 -0.44 0.75
 -2 0 -5 1.02 0.73
 2 0 6 1.78 0.55
 -2 0 -6 2.44 0.53
 2 0 7 0.37 0.33
 -2 0 -7 0.49 0.51
 -2 0 -7 -1.23 0.58
 2 0 8 4.81 0.41
 -2 0 -8 3.71 0.9
 -2 0 -8 3.68 0.65
 2 0 9 -0.65 0.66
 -2 0 -9 1.11 0.66
 -2 0 -9 0.69 0.66
 2 0 10 10.41 0.63
 -2 0 -10 8.36 0.85
 -2 0 -10 9.98 1.32
 2 0 11 0.38 0.89
 -2 0 -11 0.3 0.78
 -2 0 -11 -0.79 0.76
 2 0 12 33.21 1.11
 -2 0 -12 34.97 1.35
 -2 0 -12 35.58 1.44
 2 0 13 1.32 0.74
 -2 0 -13 0.86 0.88
 -2 0 -13 -1.73 0.98
 2 0 14 73.3 2.8
 -2 0 -14 71.25 2.32
 2 0 15 -1.46 0.91
 -2 0 -15 0.39 1.04
 -2 0 -16 25.45 1.56
 -2 0 -17 0.83 1.21
 -2 0 -18 24.67 2.66
 -2 0 -19 4.69 2.24
 -2 0 -20 0.91 1.51
 -2 0 -21 1.15 1.6
 -2 0 -22 6.57 1.87
 -2 0 -23 2.01 1.88
 -2 0 -24 1.33 2.97
 -2 0 -25 -1.6 1.91
 -2 0 -26 -0.5 2.01
 -2 0 -27 -0.64 1.94
 -2 0 -28 -1.17 2.02
 -2 0 -29 0.16 3.11
 -2 0 -30 4.8 2.25
 2 -1 -30 0.81 2.33
 2 -1 -29 5.17 3.75
 2 -1 -28 1.19 2.35
 2 -1 -27 2.86 2.54
 -2 1 27 2.39 1.98
 2 1 -26 0.36 1.07
 2 -1 -26 0.99 2.36
 -2 1 26 -0.14 1.92
 2 1 -25 21.32 1.5
 2 -1 -25 27.38 3.04
 -2 1 25 33.15 2.59
 2 1 -24 2.43 1.58
 2 -1 -24 7.53 3.28
 -2 1 24 2.53 2.89
 2 1 -23 8.12 1.57
 2 -1 -23 6.2 2.07
 -2 1 23 8.15 1.86
 2 1 -22 1.87 1.16
 2 1 -22 1.38 0.85
 2 -1 -22 -1.01 1.8
 -2 1 22 6.75 2.37
 2 1 -21 0.79 1.12
 2 -1 -21 0.58 2.58
 2 1 -21 0.84 0.8
 -2 1 21 1.24 1.45
 2 1 -20 0.86 0.76
 2 -1 -20 3.97 1.58
 2 1 -20 3.25 1.02
 -2 1 20 1.8 1.36
 2 1 -19 4.83 1.15
 2 1 -19 6.65 1.52
 2 -1 -19 6.99 1.53
 -2 1 19 7.88 1.4
 2 -1 -18 -2.55 2.01
 2 1 -18 1.75 1
 2 1 -18 2.59 1.24
 -2 1 18 0.64 1.2
 2 1 -17 0.66 0.58
 2 -1 -17 2.47 1.22
 2 1 -17 1.77 0.71
 -2 1 17 -4.12 1.72
 2 1 -16 1.78 0.52
 2 1 -16 1.69 0.62
 2 -1 -16 1.92 1.13
 -2 1 16 1.94 1.06
 2 1 -15 2.53 0.57
 2 1 -15 3 0.49
 2 -1 -15 1.13 1.34
 2 -1 -15 2.98 1.11
 -2 1 15 3.03 1.64
 2 1 -14 1.3 0.41
 2 -1 -14 2.77 1.01
 2 -1 -14 2.06 1.16
 2 1 -14 1.75 0.48
 -2 1 14 1.8 0.98
 2 -1 -13 0.1 0.86
 2 1 -13 1.57 0.4
 2 -1 -13 1.04 1.08
 2 1 -13 0.49 0.35
 -2 1 13 1.19 0.91
 2 -1 -12 18.01 1.25
 2 1 -12 15.48 0.65
 2 1 -12 15.74 0.57
 2 -1 -12 12.61 1.01
 -2 1 12 15.86 1.07
 -2 1 12 10.67 1.73
 2 -1 -11 -0.21 0.76
 2 1 -11 -0.04 0.41
 2 -1 -11 -1.26 1.39
 2 1 -11 0.72 0.33
 -2 1 11 -1.01 0.83
 -2 1 11 -0.91 0.76
 -2 -1 11 -0.33 0.87
 2 1 -10 13.67 0.34
 2 -1 -10 14.56 1.36
 2 -1 -10 13.59 0.98
 2 1 -10 12.81 0.41
 -2 -1 10 13.54 1
 -2 1 10 14.35 0.94
 -2 1 10 13.66 0.97
 2 1 -9 0.48 0.2
 2 -1 -9 0.19 0.74
 2 -1 -9 1.52 0.69
 2 1 -9 0.09 0.14
 -2 -1 9 2.12 1.16
 -2 1 9 0.49 1.05
 -2 1 9 0.2 1.09
 2 1 -8 11.92 0.14
 2 -1 -8 10.43 1.26
 2 -1 -8 12.54 0.77
 -2 1 8 9.87 0.8
 -2 1 8 11.63 0.82
 -2 -1 8 13.83 0.8
 2 -1 -7 2.09 0.67
 2 -1 -7 3.47 0.61
 -2 1 7 3.12 0.7
 -2 -1 7 2.21 0.64
 -2 1 7 -0.04 0.97
 2 -1 -6 2.04 0.56
 2 -1 -6 -0.25 0.61
 -2 1 6 -1.23 0.6
 -2 -1 6 3.54 0.85
 -2 1 6 0.15 0.59
 2 -1 -5 1.92 0.54
 2 -1 -5 2.44 0.83
 -2 1 5 0.79 0.58
 -2 -1 5 2.61 0.51
 -2 -1 5 1.79 0.12
 -2 -1 5 2.06 0.09
 -2 1 5 1.86 0.55
 2 -1 -4 29.88 1.24
 2 -1 -4 26.7 0.82
 -2 -1 4 30.9 0.4
 -2 1 4 32.17 0.88
 -2 -1 4 30.33 0.32
 -2 -1 4 32.49 0.78
 -2 1 4 29.33 1.22
 2 1 -3 2.98 0.18
 2 -1 -3 3.18 0.75
 2 -1 -3 1.82 0.51
 -2 1 3 3.07 0.54
 -2 -1 3 4.19 0.29
 2 1 -2 101.15 1.2
 2 -1 -2 101.5 1.71
 -2 1 2 100.34 1.8
 -2 -1 2 100.64 1.4
 2 1 -1 1341.09 52.65
 2 -1 -1 1350.8 57.56
 -2 1 1 1332.95 56.85
 -2 -1 1 1354.2 53.59
 2 1 0 241.39 4.37
 2 -1 0 246.38 4.39
 -2 -1 0 240.36 3.99
 -2 1 0 234.7 4.38
 2 -1 1 357.49 7.44
 2 1 1 360.42 7.79
 -2 1 -1 360.9 7.42
 -2 -1 -1 367.34 7.51
 2 1 2 359.43 8.22
 2 -1 2 368.99 7.57
 -2 -1 -2 371.42 7.93
 -2 1 -2 364.69 7.61
 2 -1 3 0.8 0.41
 2 1 3 3.58 0.75
 -2 1 -3 2.08 0.64
 -2 -1 -3 1.04 0.51
 2 1 4 120.26 2.77
 2 -1 4 120.61 2.04
 -2 -1 -4 117.24 2.9
 -2 1 -4 116.69 2.03
 -2 -1 -4 120.39 1.34
 2 -1 5 224.93 4.78
 2 1 5 218.85 4.63
 -2 1 -5 217.75 4.63
 -2 -1 -5 223.42 2.88
 -2 -1 -5 229.06 5.7
 2 1 6 21.89 0.92
 2 -1 6 24.63 0.75
 2 1 6 22.71 0.4
 -2 -1 -6 21.47 0.48
 -2 -1 -6 23.98 1.01
 -2 1 -6 21.95 0.99
 2 1 7 22.24 0.96
 2 1 7 18.57 0.59
 2 -1 7 16.81 0.72
 -2 -1 -7 19.92 1.03
 -2 -1 -7 19.21 0.4
 -2 1 -7 16.27 0.74
 2 1 8 1.22 0.75
 2 1 8 1.26 0.51
 2 -1 8 2.35 0.62
 -2 1 -8 1.13 0.86
 -2 -1 -8 0.62 0.31
 -2 -1 -8 1.12 0.82
 2 -1 9 6.2 0.71
 2 1 9 3.45 0.65
 2 1 9 5.07 0.88
 -2 1 -9 5.15 0.63
 -2 -1 -9 3.62 0.92
 -2 -1 -9 3.36 0.58
 2 -1 10 3.91 1.26
 2 1 10 7.47 1.45
 2 1 10 5.71 0.49
 -2 1 -10 6.7 1.06
 -2 -1 -10 6.69 1.05
 -2 -1 -10 5.87 0.46
 2 1 11 77.96 2.23
 2 -1 11 80.93 2.28
 2 1 11 84.1 1.6
 -2 1 -11 81.34 1.95
 -2 -1 -11 84.9 1.59
 2 1 12 49.66 1.75
 2 1 12 49.74 1.77
 2 -1 12 54.04 1.72
 -2 -1 -12 49.3 1.18
 -2 1 -12 48.01 1.45
 2 1 13 -0.58 0.95
 2 1 13 -0.05 1.02
 2 -1 13 1.56 0.93
 -2 -1 -13 1.63 0.96
 -2 1 -13 0.57 0.78
 -2 1 -13 0.11 0.79
 2 1 14 4.92 1.22
 2 1 14 5.41 1.11
 -2 1 -14 5.55 0.92
 -2 1 -14 4.97 1.42
 -2 -1 -14 6.43 0.77
 2 1 15 30.12 1.88
 2 1 15 29.93 1.72
 -2 -1 -15 31.58 1.22
 -2 1 -15 28.26 1.96
 -2 1 -15 33.57 1.58
 2 1 16 -1.14 1.21
 2 1 16 -0.35 1.45
 -2 -1 -16 1.61 0.84
 -2 1 -16 4.09 1.46
 -2 -1 -16 0.79 1.39
 2 1 17 1.16 1.58
 -2 1 -17 -2.41 1.57
 -2 -1 -17 0.9 1.46
 -2 1 -18 3.75 1.72
 -2 -1 -18 1.76 1.6
 -2 -1 -19 4.07 1.79
 -2 1 -19 4.8 1.84
 -2 -1 -20 6.1 2.96
 -2 1 -20 1.28 1.27
 -2 1 -21 -2.1 1.33
 -2 -1 -21 -4.37 2.08
 -2 -1 -22 -1.35 2.2
 -2 1 -22 1.49 1.4
 -2 1 -23 1.51 1.47
 -2 -1 -23 2.15 2.36
 -2 -1 -24 -4.96 3.62
 -2 1 -24 -0.04 1.52
 -2 -1 -25 6.04 2.39
 -2 1 -25 -1.19 1.62
 -2 -1 -26 -3.48 2.5
 -2 1 -26 2.02 2.54
 -2 -1 -27 2.57 2.44
 -2 1 -27 -2.62 2.58
 -2 -1 -28 -0.44 3.86
 -2 1 -28 1.24 1.71
 -2 -1 -29 6.67 2.91
 -2 -1 -30 1.97 2.75
 -2 -1 -31 -1.21 2.79
 -2 -1 -32 -1.21 4.37
 2 -2 -32 -0.68 3.1
 2 -2 -31 1.9 2.82
 -2 2 31 2.83 2.68
 2 -2 -30 2.76 2.76
 -2 2 30 -4.71 2.52
 2 -2 -29 1.19 2.68
 -2 2 29 1.49 2.41
 2 -2 -28 -0.41 4.11
 -2 2 28 5.23 4.01
 2 -2 -27 4.48 2.62
 -2 2 27 3.01 2.62
 2 -2 -26 -0.59 2.38
 -2 2 26 2.75 2.3
 2 -2 -25 5.06 2.5
 -2 2 25 9.55 2.46
 2 -2 -24 10.56 2.4
 -2 2 24 10.08 2.41
 2 2 -23 0.04 0.96
 2 2 -23 -0.37 0.93
 2 -2 -23 1.82 2.97
 -2 2 23 0.01 2.94
 2 -2 -22 18.37 2.46
 -2 2 22 28.07 2.56
 2 2 -21 2.24 1.1
 2 -2 -21 2.28 1.76
 2 2 -21 -0.56 0.84
 -2 2 21 1.43 1.75
 2 2 -20 16.37 1.21
 2 2 -20 17.32 0.72
 2 -2 -20 19.49 2.06
 -2 2 20 25.83 3.32
 2 2 -19 34.08 0.98
 2 2 -19 37.86 1.2
 2 -2 -19 41.5 2.38
 -2 2 19 35.72 2.53
 2 2 -18 7.67 0.8
 2 2 -18 5.45 0.47
 2 -2 -18 8.05 1.46
 -2 2 18 5.89 2.58
 2 2 -17 -0.35 0.59
 2 2 -17 -0.59 0.61
 2 -2 -17 1.57 1.26
 -2 2 17 1.47 1.52
 2 2 -16 2.81 0.54
 2 2 -16 2.18 0.5
 2 -2 -16 1.24 1.23
 -2 2 16 2.41 1.46
 2 2 -15 4.99 0.46
 2 -2 -15 5.37 1.87
 -2 2 15 8.45 1.47
 2 2 -14 67.25 0.98
 2 -2 -14 73.68 2.55
 -2 2 14 70.08 2.83
 2 2 -13 0.99 0.26
 2 2 -13 0.51 0.26
 2 -2 -13 0.09 1.03
 -2 2 13 3.04 1.24
 2 -2 -12 45.51 1.74
 -2 2 12 39.7 2.03
 2 2 -11 28.56 0.32
 2 -2 -11 32.28 1.38
 -2 2 11 27.18 1.59
 -2 2 11 22.7 1.64
 2 -2 -10 8.52 1.03
 -2 -2 10 10.88 0.27
 -2 2 10 7.94 1.25
 -2 2 10 13.44 1.21
 2 -2 -9 4.71 0.86
 2 -2 -9 2.99 1.15
 -2 2 9 -0.64 1.03
 -2 -2 9 2.45 0.25
 2 -2 -8 3.63 1.23
 2 -2 -8 2.98 1.07
 2 2 -7 7.89 0.42
 2 -2 -7 7.66 1.34
 2 -2 -7 7.81 1.13
 -2 2 7 7.9 1.07
 -2 -2 7 8.16 0.29
 2 2 -6 3.41 0.31
 2 -2 -6 3.84 1.24
 2 -2 -6 2.91 0.99
 -2 2 6 2.07 0.94
 -2 -2 6 2.85 0.3
 2 -2 -5 4.11 0.95
 -2 -2 5 4.14 0.55
 -2 2 5 8.46 1.44
 2 2 -4 9.33 0.67
 2 -2 -4 10.85 0.98
 -2 -2 4 9.88 0.48
 -2 2 4 9.24 1.02
 2 2 -3 10.08 0.52
 2 -2 -3 12.07 0.92
 -2 -2 3 13.06 0.84
 -2 2 3 8.27 0.96
 2 -2 -2 404.71 10.68
 2 2 -2 381.65 8.7
 -2 -2 2 383 9.75
 -2 2 2 389.97 10.6
 2 2 -1 69.78 1.83
 2 -2 -1 66.91 1.74
 -2 -2 1 70.32 1.49
 -2 2 1 67.5 1.83
 2 2 0 994.05 38.11
 2 -2 0 1019.5 41.06
 -2 -2 0 1000.77 39.36
 -2 2 0 979.3 39.91
 2 2 1 783.8 26.96
 2 -2 1 785.19 27.72
 -2 2 -1 797.71 29.83
 -2 -2 -1 791.38 28.2
 2 2 2 350.33 8.77
 2 -2 2 349.33 8.34
 -2 -2 -2 352.79 9.05
 -2 2 -2 352.27 9.96
 2 2 3 7.08 0.83
 2 -2 3 6.73 1.05
 -2 2 -3 8.75 0.74
 -2 -2 -3 9.62 0.92
 2 2 4 11.38 0.92
 2 -2 4 10.88 0.71
 -2 -2 -4 14.76 1.04
 -2 2 -4 13.17 0.76
 2 2 5 27.42 1.25
 2 -2 5 31.81 0.96
 -2 2 -5 30.47 1.01
 -2 -2 -5 30.2 1.42
 2 2 6 22.27 1.85
 2 -2 6 26.36 0.98
 -2 -2 -6 24.39 0.66
 -2 -2 -6 32.03 1.46
 -2 2 -6 23.97 0.92
 2 2 7 7.38 1.03
 2 -2 7 3.24 1.02
 -2 -2 -7 8.55 1.15
 -2 -2 -7 4.34 0.5
 -2 2 -7 4.47 1.05
 2 2 8 15.34 1.29
 2 -2 8 18.1 1.33
 -2 -2 -8 17.8 0.95
 -2 2 -8 19.82 0.89
 2 -2 9 4.14 1.16
 2 2 9 6.89 1.11
 -2 -2 -9 5.67 0.54
 -2 2 -9 5.96 0.73
 2 2 10 39.03 2.62
 2 -2 10 36.18 1.33
 -2 -2 -10 36.25 1.3
 -2 2 -10 34.7 1.18
 2 2 11 0.66 1.13
 2 -2 11 2.54 0.79
 -2 -2 -11 0.32 0.86
 -2 2 -11 0.51 0.7
 2 2 12 3.72 1.19
 2 -2 12 1.27 1.4
 -2 -2 -12 0.87 0.97
 -2 2 -12 2.14 0.78
 2 2 13 4.16 0.88
 2 2 13 4.75 1.34
 2 -2 13 5.42 1.57
 -2 -2 -13 6.53 1.11
 -2 2 -13 6.19 1.38
 2 2 14 29.19 2.79
 2 2 14 22.07 1.85
 2 -2 14 20.7 2.06
 -2 2 -14 23.09 1.29
 -2 -2 -14 24.3 1.07
 2 2 15 32.7 1.5
 2 2 15 35.6 2.26
 2 -2 15 34.12 1.79
 -2 2 -15 34.18 1.55
 -2 -2 -15 34.49 1.35
 2 2 16 2.23 1.55
 2 2 16 1.73 1.04
 2 -2 16 2.03 1.15
 -2 -2 -16 1.34 1.39
 -2 2 -16 2.69 1.57
 2 2 17 11.01 1.29
 2 2 17 13.7 1.84
 -2 -2 -17 11.87 1.18
 -2 2 -17 10.56 1.84
 -2 2 -17 6.41 1.2
 2 2 18 7.34 2.73
 -2 2 -18 2.75 1.72
 -2 -2 -18 3.06 1.65
 2 2 19 4.21 1.74
 -2 -2 -19 2.84 1.14
 -2 2 -19 -0.25 1.19
 2 2 20 3.91 1.85
 -2 2 -20 4.13 1.3
 -2 -2 -20 2.42 1.9
 2 2 21 22.74 2.43
 -2 -2 -21 22.34 1.77
 -2 2 -21 18.86 1.7
 2 2 22 1.76 2.04
 -2 -2 -22 6.15 1.43
 -2 2 -22 2.81 1.43
 -2 -2 -23 1.86 2.38
 -2 -2 -23 -0.4 1.44
 -2 2 -23 0.23 1.39
 -2 -2 -24 4.21 2.67
 -2 2 -24 1.45 1.46
 -2 -2 -25 4.44 2.87
 -2 2 -25 2.84 1.5
 -2 -2 -26 1 4.7
 -2 2 -26 5.93 2.4
 -2 -2 -27 4.52 3.22
 -2 -2 -28 -0.34 3.24
 -2 -2 -29 0.74 3.29
 -2 -2 -30 10.13 6.1
 -2 -2 -31 -3.59 3.4
 -2 -2 -32 10.05 3.76
 -2 -2 -33 -7.54 3.68
 -2 3 34 2.53 3.4
 -2 3 33 1.39 3.29
 2 -3 -32 -0.6 3.01
 -2 3 32 -0.06 2.98
 2 -3 -31 0.9 2.8
 -2 3 31 1.95 4.88
 2 -3 -30 -4.21 2.73
 -2 3 30 2.17 2.98
 2 -3 -29 -0.22 4.11
 -2 3 29 3.74 3.02
 2 -3 -28 -0.55 2.66
 -2 3 28 -4.23 4.38
 2 -3 -27 5.61 2.72
 -2 3 27 5.52 2.97
 2 -3 -26 6.23 2.54
 -2 3 26 1.85 2.8
 2 -3 -25 2.86 2.41
 -2 3 25 6.18 4.15
 2 -3 -24 4.28 2.38
 -2 3 24 7.92 2.69
 2 -3 -23 -0.48 2.1
 -2 3 23 1.86 2.37
 2 -3 -22 4.46 2.95
 -2 3 22 -4.18 2.32
 2 -3 -21 2.62 1.81
 -2 3 21 -1.04 2.18
 2 -3 -20 6.41 2.88
 -2 3 20 4.32 3.42
 2 -3 -19 1.02 1.64
 -2 3 19 2.62 2.11
 2 -3 -18 0.24 1.58
 -2 3 18 4.38 2.01
 2 -3 -17 2.4 1.59
 -2 3 17 10.45 3.09
 2 3 -16 0.28 0.36
 2 3 -16 0.74 0.31
 2 -3 -16 0.59 1.46
 -2 3 16 -0.78 1.81
 2 3 -15 -0.04 0.26
 2 -3 -15 -0.25 2.07
 2 3 -15 0.74 0.34
 -2 3 15 1.46 1.6
 2 3 -14 0.33 0.45
 2 -3 -14 -0.08 1.27
 -2 -3 14 1.3 0.46
 -2 3 14 -2.7 1.66
 2 3 -13 0.49 0.55
 2 -3 -13 3.77 1.27
 -2 -3 13 1.38 0.52
 -2 3 13 4 1.6
 2 3 -12 1.8 0.41
 2 -3 -12 4.75 1.93
 -2 -3 12 2.53 0.38
 -2 3 12 -1.46 1.63
 2 3 -11 0.35 0.64
 2 -3 -11 4.36 1.15
 -2 -3 11 1.32 0.64
 -2 3 11 -0.06 1.44
 2 -3 -10 6.57 1.21
 2 3 -10 5.43 0.75
 -2 -3 10 7.16 0.48
 -2 3 10 8.79 2.32
 2 3 -9 6.04 0.54
 2 -3 -9 3.86 1.21
 -2 -3 9 5.55 0.53
 -2 3 9 6.9 1.55
 2 3 -8 3.19 0.82
 2 -3 -8 2.85 1.17
 -2 -3 8 1.85 0.53
 -2 3 8 1.48 2.12
 2 3 -7 2.07 0.85
 -2 -3 7 -0.19 0.59
 -2 3 7 4.84 1.38
 2 3 -6 2.11 0.61
 -2 -3 6 4.54 0.97
 -2 3 6 0.72 1.28
 2 3 -5 2.8 0.68
 -2 -3 5 3.47 1.05
 -2 3 5 4.21 1.37
 2 3 -4 13.16 1.29
 -2 -3 4 12.98 0.92
 -2 3 4 16.54 2.2
 2 3 -3 17.82 0.93
 -2 -3 3 16.69 1.52
 -2 3 3 14.75 1.46
 2 3 -2 3.48 0.78
 2 -3 -2 1.85 1.09
 -2 -3 2 1.99 0.85
 -2 3 2 -1.43 1.77
 2 3 -1 14.86 1.54
 2 -3 -1 16.04 1.37
 -2 -3 1 16.82 1.18
 -2 3 1 18.43 1.38
 2 -3 0 53.36 1.94
 2 3 0 49.98 1.68
 -2 -3 0 51.81 2.65
 -2 3 0 51.6 2.07
 2 3 1 56.91 1.98
 2 -3 1 59.15 2.03
 -2 -3 -1 73.57 2.29
 -2 3 -1 61.14 2.13
 2 3 2 48.86 1.85
 2 -3 2 44.96 1.74
 -2 -3 -2 45.58 2.02
 -2 3 -2 47.85 1.83
 2 3 3 109.69 4.29
 2 -3 3 100.39 2.82
 -2 3 -3 113.06 3.12
 2 3 4 2.38 1.11
 2 -3 4 2.82 0.9
 -2 3 -4 3.51 0.99
 2 3 5 -0.48 1.19
 2 -3 5 2.22 1.36
 -2 3 -5 5.17 1.43
 2 3 6 17.28 1.47
 2 -3 6 16.56 1.65
 -2 3 -6 19.35 1.25
 2 3 7 23.9 2.51
 2 -3 7 18.42 1.77
 -2 3 -7 25.66 1.91
 2 3 8 5.51 1.32
 2 -3 8 4.69 1.46
 -2 -3 -8 3.89 0.81
 -2 3 -8 3.29 0.95
 2 3 9 11.09 1.57
 2 -3 9 10.58 1.09
 -2 -3 -9 13 0.93
 -2 3 -9 11.05 1.65
 2 3 10 1.71 1.46
 2 -3 10 0.72 0.97
 -2 -3 -10 2.65 1.17
 -2 3 -10 -0.58 0.95
 2 3 11 5.97 2.41
 2 -3 11 4.09 1.03
 -2 -3 -11 6.35 1.29
 -2 3 -11 3.7 1.53
 2 -3 12 32.15 2.42
 2 3 12 34.47 2.37
 -2 -3 -12 36.96 1.97
 -2 3 -12 37 1.59
 2 3 13 1.66 1.65
 2 -3 13 1.67 1.66
 -2 -3 -13 0.91 0.9
 -2 3 -13 1 1.54
 2 3 14 4.38 1.84
 2 -3 14 4.9 1.84
 -2 -3 -14 5.66 1.56
 -2 3 -14 6.26 1.72
 2 3 15 0 2.68
 2 -3 15 0.92 1.78
 -2 -3 -15 -1.17 1.45
 -2 3 -15 2.06 1.13
 2 3 16 6.95 1.91
 -2 -3 -16 5.26 1.69
 -2 3 -16 3.65 1.25
 2 3 17 1.8 2
 -2 -3 -17 1.88 1.15
 -2 3 -17 4.81 1.9
 2 3 18 14.8 2.47
 -2 -3 -18 14.29 1.52
 -2 3 -18 16.93 2.36
 2 3 19 17.05 3.87
 -2 -3 -19 15.68 2.41
 -2 3 -19 13.83 1.63
 2 3 20 10.69 2.59
 -2 -3 -20 11.28 1.65
 -2 3 -20 10.29 1.56
 2 3 21 6.55 2.54
 -2 -3 -21 7.26 2.2
 -2 3 -21 4.34 1.48
 2 3 22 0.91 2.55
 -2 -3 -22 2.06 1.49
 -2 3 -22 3.78 1.47
 2 3 23 9.06 3.63
 -2 -3 -23 0.95 1.44
 -2 3 -23 0.31 1.45
 2 3 24 -1.27 2.49
 -2 -3 -24 0.07 1.41
 -2 3 -24 0.16 1.4
 2 3 25 -1.7 2.57
 -2 -3 -25 1.36 1.51
 2 3 26 -1.14 2.74
 -2 -3 -27 -1.94 3.2
 -2 -3 -28 -5.02 3.61
 -2 -3 -29 0.41 3.41
 -2 -3 -30 -19.81 6.83
 -2 -3 -31 8.89 4.17
 -2 -3 -32 -10.18 4.41
 -2 -3 -33 -4.82 4.36
 -2 4 32 -1.98 3.68
 -2 4 31 -2.79 3.59
 2 -4 -30 6.14 3.03
 -2 4 30 3.11 5.47
 2 -4 -29 3.69 4.33
 -2 4 29 2.83 3.34
 2 -4 -28 -2.65 2.62
 -2 4 28 -0.03 3.2
 2 -4 -27 -1.78 4.05
 -2 4 27 -4.82 5.1
 2 -4 -26 0.29 2.35
 -2 4 26 0.39 3.03
 2 -4 -25 0.82 3.61
 2 -4 -25 3.41 3.77
 -2 4 25 -0.22 3.01
 2 -4 -24 2.98 2.37
 -2 4 24 4.52 4.72
 2 -4 -23 9.36 3.8
 -2 4 23 3.82 3.03
 2 -4 -22 1.83 2.36
 -2 4 22 10.32 2.93
 2 -4 -21 6.73 3.52
 -2 4 21 6.77 4.4
 2 -4 -20 0.79 2.1
 -2 4 20 5.14 2.73
 2 -4 -19 15.08 2.56
 -2 4 19 22.71 3.21
 2 -4 -18 -0.2 1.9
 2 4 -18 0.36 0.43
 -2 4 18 4.57 3.77
 2 -4 -17 4.62 1.84
 -2 -4 17 1.25 0.69
 -2 4 17 5.85 2.4
 2 4 -16 1.34 0.82
 2 -4 -16 4.28 2.64
 -2 -4 16 2.22 0.71
 -2 4 16 1.93 2.21
 2 4 -15 5.01 0.95
 2 -4 -15 2.9 1.76
 -2 -4 15 3.77 0.88
 -2 4 15 -1.12 3.55
 2 4 -14 3.53 0.65
 2 -4 -14 5.26 1.73
 -2 -4 14 3.67 1.06
 -2 4 14 4.65 2.18
 2 -4 -13 26.37 3.42
 2 4 -13 25.7 1.07
 -2 -4 13 25.93 1.51
 -2 4 13 30.11 2.78
 2 -4 -12 11.78 1.73
 2 4 -12 7.72 0.85
 -2 -4 12 9.88 0.78
 -2 4 12 9.85 2.34
 2 4 -11 1.87 1.17
 2 -4 -11 -0.28 1.59
 -2 -4 11 2.68 0.79
 -2 4 11 1.76 1.98
 2 -4 -10 8.27 2.45
 2 4 -10 2.68 1.26
 -2 4 10 2.25 1.96
 -2 -4 10 2.97 1.34
 2 4 -9 7.74 1.4
 2 -4 -9 8.73 1.7
 -2 -4 9 7.21 1.02
 -2 4 9 7.9 2.08
 2 4 -8 1.71 0.88
 -2 -4 8 3.12 0.93
 -2 4 8 -2.15 1.76
 2 4 -7 139.99 3.67
 -2 4 7 148.53 7.8
 -2 -4 7 127.71 3.96
 2 4 -6 66.36 2.1
 -2 -4 6 55.26 2.29
 -2 4 6 64.08 3.49
 2 4 -5 2.14 1
 -2 -4 5 0.12 1.08
 -2 4 5 1 1.71
 2 4 -4 71.18 3.35
 -2 4 4 72.05 3.59
 -2 -4 4 69.46 2.72
 2 4 -3 20.63 1.42
 -2 4 3 20.66 2.11
 2 4 -2 22.28 1.56
 -2 4 2 24.17 3.23
 2 4 -1 5.13 1.21
 -2 4 1 -0.4 1.56
 2 4 0 13.14 1.5
 -2 4 0 12.24 1.75
 2 4 1 152.98 6.61
 -2 4 -1 158.71 5.56
 2 4 2 8.37 1.43
 -2 4 -2 5.2 1.56
 2 4 3 42.06 2.28
 -2 4 -3 44.64 3.57
 2 4 4 19.57 1.94
 -2 4 -4 25.73 1.9
 2 4 5 35.03 3.28
 -2 4 -5 31.12 2.05
 2 4 6 -2.12 1.58
 -2 4 -6 1.55 2.02
 2 4 7 67.97 3.39
 -2 4 -7 70.41 2.91
 2 4 8 -0.67 1.75
 -2 4 -8 3.62 2.05
 2 4 9 5.74 2.81
 -2 4 -9 2.6 1.36
 2 4 10 27.96 2.52
 -2 -4 -10 26.57 2.46
 -2 4 -10 25.62 1.89
 2 4 11 5.94 1.92
 -2 -4 -11 1.78 1.86
 -2 4 -11 1.05 2.17
 2 4 12 5.04 2.03
 -2 4 -12 2.39 1.39
 -2 -4 -12 2.4 1.88
 2 4 13 22.94 4.07
 -2 -4 -13 27.28 2.59
 -2 4 -13 24.39 1.94
 2 4 14 -4.63 2.15
 -2 -4 -14 -3.06 1.26
 -2 4 -14 -0.38 1.51
 2 4 15 16.54 2.64
 -2 -4 -15 12.57 1.54
 -2 4 -15 13.64 2.58
 2 4 16 6.1 2.31
 -2 -4 -16 0.39 1.35
 -2 4 -16 2.67 1.48
 2 4 17 4.06 3.64
 -2 -4 -17 -0.54 1.37
 -2 4 -17 1.9 1.52
 2 4 18 0.33 2.34
 -2 4 -18 -1.35 1.59
 -2 -4 -18 -2.82 2.13
 2 4 19 1.97 2.61
 -2 -4 -19 5.61 1.55
 -2 4 -19 8.7 1.77
 2 4 20 7.55 2.84
 -2 -4 -20 6.36 1.69
 -2 4 -20 8.47 2.72
 2 4 21 -4.4 2.73
 -2 -4 -21 -1.07 1.56
 -2 4 -21 3.62 2.4
 2 4 22 -2.5 2.84
 -2 -4 -22 0.36 2.47
 2 4 23 1.27 2.97
 -2 -4 -23 1.48 1.56
 2 4 24 -1.15 3
 2 4 25 9.55 3.53
 2 4 26 5.52 3.18
 2 4 27 4.4 3.13
 2 4 28 4.96 3.22
 2 4 29 2.06 3.35
 -2 -4 -30 -2.63 4.09
 -2 -4 -31 8.67 4.49
 -2 5 30 1.8 3.67
 -2 5 29 3.18 3.74
 -2 5 28 -9.3 5.99
 2 -5 -27 -3.72 3.96
 -2 5 27 1.54 3.45
 2 -5 -26 2.22 2.48
 -2 5 26 -2 3.38
 2 -5 -25 3.25 3.83
 -2 5 25 -1.09 5.14
 2 -5 -24 -0.52 2.44
 -2 5 24 2.69 3.36
 2 -5 -23 -0.05 3.77
 -2 5 23 2.47 3.26
 2 -5 -22 4.64 2.49
 -2 5 22 1.82 3.3
 2 -5 -21 0.6 2.47
 -2 5 21 4.03 3.31
 2 -5 -20 2.68 2.52
 -2 5 20 5.92 3.32
 2 -5 -19 12.03 2.74
 -2 5 19 13.82 3.59
 2 -5 -18 4.68 3.51
 -2 5 18 2.1 4.77
 2 -5 -17 4.08 2.25
 -2 5 17 2.19 2.9
 2 -5 -16 -1.16 3.37
 2 5 -16 0.12 1.35
 -2 5 16 -2.22 2.62
 2 -5 -15 0.79 2.13
 2 5 -15 -1.27 1.51
 -2 5 15 0.42 4.09
 2 5 -14 0.21 1.06
 2 -5 -14 2.69 2.01
 -2 5 14 2.75 2.63
 2 5 -13 0.92 1.08
 2 -5 -13 0.65 3.06
 -2 -5 13 -1.07 1.54
 -2 5 13 -1.51 2.54
 2 -5 -12 0.72 2.11
 2 5 -12 3.69 1.17
 -2 -5 12 2.73 1.12
 -2 5 12 1.86 4.07
 2 5 -11 3.07 1.22
 2 -5 -11 4.12 2.15
 -2 -5 11 0.65 1.21
 -2 5 11 0.84 2.49
 2 5 -10 7.31 1.39
 2 -5 -10 5.35 2.27
 -2 5 10 10.26 2.72
 2 5 -9 2.93 1.3
 -2 5 9 2.62 2.39
 2 5 -8 1.33 1.25
 -2 5 8 -1.5 2.29
 2 5 -7 4.08 1.99
 -2 5 7 -3.33 2.25
 2 5 -6 6.56 2.2
 -2 5 6 1.85 2.25
 2 5 -5 1.36 2.13
 -2 5 5 -3.17 3.4
 2 5 -4 -1.12 1.41
 -2 5 4 1.96 2.14
 2 5 -3 2.41 1.51
 -2 5 3 3.27 2.18
 2 5 -2 6.07 1.64
 -2 5 2 10.88 3.41
 2 5 -1 6 1.69
 -2 5 1 3.04 2.13
 2 5 0 9.4 2.85
 -2 5 0 9.45 2.26
 2 5 1 -1.24 1.7
 -2 5 -1 7.97 3.02
 2 5 2 1.88 1.69
 -2 5 -2 0.17 1.95
 2 5 3 37.14 2.85
 -2 5 -3 33.6 2.91
 2 5 4 5.11 1.9
 -2 5 -4 2.15 1.92
 2 5 5 3.08 3.02
 -2 5 -5 4.54 2.94
 2 5 6 0.6 2.03
 -2 5 -6 2.45 1.84
 2 5 7 2.68 2.19
 -2 5 -7 4.03 1.91
 2 5 8 1.88 2.25
 -2 5 -8 8.19 3.01
 2 5 9 0.12 2.32
 -2 5 -9 3.77 2.87
 2 5 10 5.05 3.75
 -2 5 -10 5.17 1.98
 2 5 11 1.32 2.31
 -2 -5 -11 2.49 1.63
 -2 5 -11 0.39 1.91
 2 5 12 3.42 2.41
 -2 -5 -12 2.72 1.64
 -2 5 -12 1.02 1.9
 2 5 13 2.93 2.5
 -2 -5 -13 5.5 1.68
 2 5 14 7.77 2.88
 -2 -5 -14 6.07 1.82
 -2 5 -14 13.01 3.15
 2 5 15 4.27 4.16
 -2 -5 -15 1.87 2.59
 -2 5 -15 3.44 1.91
 2 5 16 6.53 2.96
 -2 -5 -16 2.93 2.64
 -2 5 -16 6.31 2.06
 2 5 17 5.01 2.78
 -2 -5 -17 3.54 1.67
 -2 5 -17 -1.69 1.85
 2 5 18 1.5 2.91
 -2 -5 -18 0.36 1.7
 -2 5 -18 3.08 1.91
 2 5 19 22.89 5.53
 -2 -5 -19 11.52 3.17
 -2 5 -19 13.87 2.27
 2 5 20 7.91 3.29
 -2 -5 -20 5.64 2.9
 2 5 21 7.61 3.3
 -2 -5 -21 3.27 1.87
 2 5 22 3.01 3.27
 2 5 23 2.55 5
 2 5 24 -2.99 3.36
 2 5 25 6.42 3.75
 2 5 26 2.45 3.51
 2 5 27 -0.66 5.46
 2 5 28 -2.51 3.43
 2 5 29 -2.07 3.53
 -2 6 28 -6.18 4.38
 -2 6 27 2.69 4.09
 -2 6 26 4.98 4.13
 2 -6 -25 4.86 4.18
 -2 6 25 -3.23 5.97
 2 -6 -24 -1.63 2.64
 -2 6 24 6.31 3.69
 2 -6 -23 4.18 3.91
 -2 6 23 -3.48 3.55
 2 -6 -22 -0.18 2.66
 -2 6 22 -3.5 5.54
 2 -6 -21 -1.37 3.96
 -2 6 21 1.08 3.62
 2 -6 -20 4.36 2.73
 -2 6 20 6.53 4
 2 -6 -19 3.49 4.32
 -2 6 19 5.26 3.76
 2 -6 -18 7.65 2.86
 -2 6 18 10.95 6.02
 2 -6 -17 -0.62 2.66
 -2 6 17 1.88 3.41
 2 -6 -16 2.79 2.7
 -2 6 16 4.09 3.53
 2 -6 -15 1.58 2.61
 -2 6 15 0.05 3.24
 2 -6 -14 1.31 3.85
 2 6 -14 0.21 1.42
 -2 6 14 -1.98 4.82
 2 -6 -13 9.36 3.06
 2 6 -13 10.46 1.77
 -2 6 13 14.28 3.58
 2 6 -12 7.15 1.8
 2 -6 -12 12.28 4.42
 -2 6 12 6.7 3.43
 2 6 -11 -0.35 1.65
 2 -6 -11 1.22 2.72
 -2 6 11 4.12 2.98
 2 6 -10 0.34 1.69
 -2 6 10 6.28 3.03
 2 6 -9 -0.66 1.69
 -2 6 9 8.28 2.97
 2 6 -8 9.14 2.02
 -2 6 8 14.85 3.17
 2 6 -7 23.17 2.33
 -2 6 7 11.9 5.53
 2 6 -6 37.45 2.95
 -2 6 6 38.05 4.32
 2 6 -5 3.35 1.86
 -2 6 5 -1.4 2.67
 2 6 -4 3.1 2.04
 -2 6 4 4.17 2.74
 2 6 -3 -1.92 1.99
 -2 6 3 4.67 3.88
 2 6 -2 1 3.22
 -2 6 2 2.51 2.71
 2 6 -1 3.01 3.26
 -2 6 1 6.18 2.8
 2 6 0 11.32 2.36
 -2 6 0 1.92 2.84
 2 6 1 20.01 2.73
 -2 6 -1 19.9 3.31
 2 6 2 11.01 2.67
 -2 6 -2 15.37 4.62
 2 6 3 0.21 2.26
 -2 6 -3 1.78 2.57
 2 6 4 11.78 2.68
 -2 6 -4 10.42 2.98
 2 6 5 1.58 3.83
 -2 6 -5 1.38 2.54
 2 6 6 4.15 2.65
 -2 6 -6 3.62 4.05
 2 6 7 15.01 3.27
 -2 6 -7 17.26 4.65
 2 6 8 4.32 2.88
 -2 6 -8 4.1 2.61
 2 6 9 0.48 2.88
 -2 6 -9 5.81 2.53
 2 6 10 3.89 4.43
 -2 6 -10 2.55 2.56
 2 6 11 -1.05 2.89
 -2 -6 -11 2.24 2.15
 -2 6 -11 1.43 2.37
 2 6 12 -2.13 2.91
 -2 -6 -12 -4.16 3.17
 -2 6 -12 4.13 3.6
 2 6 13 23.31 3.79
 -2 6 -13 15.77 4.67
 -2 -6 -13 18.05 2.6
 2 6 14 -0.5 3.16
 -2 -6 -14 -0.41 1.91
 -2 6 -14 -6.17 3.71
 2 6 15 -13.73 5.04
 -2 -6 -15 3.8 2.9
 -2 6 -15 -0.4 2.33
 2 6 16 1.26 3.39
 -2 6 -16 -0.06 2.34
 -2 -6 -16 8.64 3.11
 2 6 17 0.8 3.42
 -2 -6 -17 4.25 2
 2 6 18 3.66 3.4
 -2 -6 -18 1.13 1.9
 2 6 19 3.16 3.46
 2 6 20 8.66 5.71
 2 6 21 -0.19 3.34
 2 6 22 0.08 3.41
 2 6 23 1.05 3.53
 2 6 24 -0.47 5.61
 2 6 25 -0.99 3.72
 2 6 26 -0.54 3.95
 2 6 27 2.56 4.09
 -2 7 24 3.79 4.36
 -2 7 23 -0.88 4.1
 2 -7 -22 -1.49 4.65
 -2 7 22 7.78 4.24
 2 -7 -21 -4.53 2.86
 -2 7 21 2.47 6.61
 2 -7 -20 4.68 4.49
 -2 7 20 2.72 4.32
 2 -7 -19 -1.14 2.89
 -2 7 19 -1.67 4.03
 2 -7 -18 1.42 4.42
 -2 7 18 1.92 3.84
 2 -7 -17 0.18 3.04
 -2 7 17 10.51 6.06
 2 -7 -16 -2.66 2.95
 -2 7 16 0.56 3.9
 2 -7 -15 -1.33 2.97
 -2 7 15 7.13 3.74
 2 -7 -14 0.31 2.97
 -2 7 14 0.2 3.64
 2 -7 -13 0.49 3.13
 -2 7 13 12.68 5.82
 2 -7 -12 2.75 3.21
 -2 7 12 0.58 3.77
 2 7 -11 -0.44 3.16
 2 -7 -11 1.11 3.21
 -2 7 11 4.43 3.59
 2 7 -10 1.04 3.26
 -2 7 10 3.6 3.61
 2 7 -9 9.86 3.66
 -2 7 9 9.7 3.94
 2 7 -8 4.78 3.41
 -2 7 8 -1.08 5.6
 2 7 -7 1.7 3.49
 -2 7 7 1.32 3.56
 2 7 -6 1.93 3.5
 -2 7 6 -0.91 3.29
 2 7 -5 3.81 2.45
 -2 7 5 5.15 3.56
 2 7 -4 -1.66 2.42
 -2 7 4 -3.97 5.23
 2 7 -3 5.41 2.68
 -2 7 3 6.8 3.46
 2 7 -2 5.88 2.65
 -2 7 2 -0.3 3.43
 2 7 -1 4.84 2.76
 -2 7 1 5.93 3.33
 2 7 0 -0.71 2.7
 -2 7 0 5.17 3.23
 2 7 1 3.15 2.82
 -2 7 -1 -2.49 4.87
 2 7 2 0.83 2.85
 -2 7 -2 2.41 5.11
 2 7 3 0.75 4.58
 -2 7 -3 1.58 3.2
 2 7 4 3.11 3.01
 -2 7 -4 0.67 3.28
 2 7 5 8.81 3.42
 -2 7 -5 4.57 3.49
 2 7 6 5.96 3.44
 -2 7 -6 11.67 3.49
 2 7 7 -3.06 3.15
 -2 7 -7 2.49 3.07
 2 7 8 6.37 3.63
 -2 7 -8 6.43 5.17
 2 7 9 0.98 5.13
 -2 7 -9 -4.09 4.8
 2 7 10 1.29 5
 -2 7 -10 -0.39 2.98
 2 7 11 5.18 3.47
 -2 -7 -11 1.66 3.9
 -2 7 -11 2.19 3.04
 2 7 12 -0.82 3.42
 -2 -7 -12 0.16 2.4
 -2 7 -12 0.49 2.86
 2 7 13 2.98 3.59
 -2 -7 -13 0.56 2.44
 -2 7 -13 5.07 2.79
 2 7 14 6.53 3.65
 -2 7 -14 3.11 2.84
 -2 -7 -14 -0.73 3.74
 2 7 15 8.58 5.57
 -2 -7 -15 -1.49 2.21
 2 7 16 3.52 3.9
 -2 -7 -16 7.2 2.67
 2 7 17 0.96 3.64
 2 7 18 -1.82 3.75
 2 7 19 -1.03 3.83
 2 7 20 8.69 6.71
 2 7 21 3.41 3.99
 2 7 22 4.15 4.23
 2 7 23 -1.14 4.08
 -2 8 20 7.01 7.74
 2 -8 -19 7.86 5.1
 -2 8 19 0.1 4.77
 2 -8 -18 -0.94 3.25
 -2 8 18 4.56 4.57
 2 -8 -17 5.6 5.46
 -2 8 17 4.95 4.68
 2 -8 -16 1.35 3.22
 -2 8 16 -0.96 6.55
 2 -8 -15 5.15 3.38
 -2 8 15 2.45 4.45
 2 -8 -14 6.36 3.52
 -2 8 14 -1.33 4.25
 2 -8 -13 -3.97 3.56
 -2 8 13 -2.09 4.28
 2 -8 -12 3.27 3.63
 -2 8 12 3.48 4.13
 2 -8 -11 0.04 3.54
 -2 8 11 -0.94 6.08
 -2 8 10 -5.9 4.29
 2 8 -9 1.46 2.56
 -2 8 9 -0.01 4.01
 2 8 -8 5.54 2.6
 -2 8 8 -2.21 4.09
 2 8 -7 4.84 2.78
 -2 8 7 0.94 4.08
 2 8 -6 -0.13 2.57
 -2 8 6 0.35 3.86
 2 8 -5 4.96 2.93
 -2 8 5 4.33 6.31
 2 8 -4 2.67 2.92
 -2 8 4 7.53 4.15
 2 8 -3 -0.87 4.57
 -2 8 3 5.99 3.96
 2 8 -2 2.44 4.7
 -2 8 2 -0.68 3.79
 2 8 -1 4.16 4.85
 -2 8 1 4.26 4.08
 2 8 0 8.91 5.34
 -2 8 0 6.28 4.02
 2 8 1 0.5 3.38
 -2 8 -1 7.1 5.83
 2 8 2 5.52 3.68
 -2 8 -2 9.86 6.29
 2 8 3 3.2 3.61
 -2 8 -3 0.04 3.66
 2 8 4 3.04 3.49
 -2 8 -4 -4.38 3.48
 2 8 5 4.49 3.86
 -2 8 -5 4.47 3.68
 2 8 6 2.52 3.76
 -2 8 -6 4.06 3.47
 2 8 7 -5.77 5.71
 -2 8 -7 1.54 3.37
 2 8 8 3.51 5.67
 -2 8 -8 -1.74 3.28
 2 8 9 2.25 3.66
 -2 8 -9 1.54 3.22
 2 8 10 4.49 3.83
 -2 8 -10 4.47 5.1
 2 8 11 0.11 3.8
 -2 8 -11 0.2 4.69
 -2 -8 -11 3.28 4.37
 2 8 12 3.8 3.84
 -2 -8 -12 0.98 2.81
 2 8 13 3.06 3.92
 -2 -8 -13 -2.57 2.75
 2 8 14 0.24 6
 2 8 15 -0.89 3.95
 2 8 16 -1.41 4.03
 2 8 17 -0.7 3.91
 2 8 18 6.4 4.53
 2 8 19 0.62 6.55
 2 -9 -13 1.88 3.9
 -2 9 13 6.27 7.76
 2 -9 -12 3.43 5.89
 -2 9 12 -1.22 4.6
 2 -9 -11 3.88 3.96
 -2 9 11 -6.18 4.59
 2 -9 -10 -1.95 6.03
 -2 9 10 -0.92 4.51
 -2 9 9 0.85 4.46
 -2 9 8 7.28 4.88
 -2 9 7 2.58 7.03
 -2 9 6 1.33 4.5
 2 9 -5 -1.21 3.24
 -2 9 5 3.5 4.4
 2 9 -4 5.28 3.29
 -2 9 4 -0.15 4.41
 2 9 -3 3.94 3.43
 -2 9 3 -0.3 4.38
 2 9 -2 2 3.43
 -2 9 2 2.72 4.31
 2 9 -1 7.07 3.72
 -2 9 1 0.78 4.39
 2 9 0 1.47 3.57
 -2 9 0 1.7 6.5
 2 9 1 5.43 3.88
 -2 9 -1 0.41 6.85
 2 9 2 3.24 3.86
 -2 9 -2 0.73 4.24
 2 9 3 9.54 6.3
 -2 9 -3 1.95 4.43
 2 9 4 7.59 6.21
 -2 9 -4 3.73 4.24
 2 9 5 0.23 3.88
 -2 9 -5 5.4 4.14
 2 9 6 4.18 4.13
 -2 9 -6 3.88 4.09
 2 9 7 8.12 4.12
 -2 9 -7 -3.51 3.94
 2 9 8 0.1 4.04
 2 9 9 4.08 4.36
 2 9 10 5.14 4.52
 2 9 11 4.62 4.59
 3 0 -28 -3.29 1.51
 3 0 -27 -1.8 1.53
 3 0 -26 24.79 2.16
 3 0 -25 -4.23 2.28
 3 0 -24 12.23 1.67
 3 0 -23 0.77 1.97
 -3 0 23 -1.62 1.12
 3 0 -22 71.96 3.92
 -3 0 22 68.56 2.47
 3 0 -21 0.72 1.32
 3 0 -21 -0.1 1.77
 -3 0 21 1.62 1.55
 3 0 -20 3.66 1.28
 3 0 -20 0.97 1.71
 -3 0 20 5.78 1.07
 3 0 -19 0.53 2.2
 3 0 -19 -0.34 1.18
 -3 0 19 0.78 1.48
 3 0 -18 5.83 1.19
 3 0 -18 3.96 1.5
 -3 0 18 6.26 0.92
 3 0 -17 0.19 0.99
 3 0 -17 3.13 1.3
 -3 0 17 1.35 1.24
 3 0 -16 58.32 2.63
 3 0 -16 57.69 2.42
 -3 0 16 55.79 1.57
 3 0 -15 -0.17 1.12
 3 0 -15 -1.84 1.22
 -3 0 15 1.19 0.66
 3 0 -14 57.95 2.1
 3 0 -14 57.41 1.6
 -3 0 14 59.03 2
 3 0 -13 -2.01 0.95
 3 0 -13 -0.87 0.64
 -3 0 13 0.66 0.9
 3 0 -12 6.79 1.46
 3 0 -12 5.03 1.01
 -3 0 12 4.66 0.57
 3 0 -11 -1.16 0.55
 3 0 -11 0.44 0.84
 -3 0 11 1 0.74
 -3 0 11 -0.54 0.81
 3 0 -10 15.74 0.64
 3 0 -10 20.08 0.99
 -3 0 10 17.05 1.47
 -3 0 10 14.53 0.9
 3 0 -9 0.39 0.66
 3 0 -9 0.8 0.7
 -3 0 9 0.6 1.06
 -3 0 9 1.53 0.45
 3 0 -8 17.91 0.8
 3 0 -8 15.72 0.85
 -3 0 8 18.2 0.82
 -3 0 8 18.77 0.84
 3 0 -7 0.95 0.35
 3 0 -7 3.52 0.92
 -3 0 7 -0.49 0.55
 -3 0 7 -0.08 0.6
 3 0 -6 15.06 0.71
 3 0 -6 16.74 0.63
 -3 0 6 15.84 0.71
 -3 0 6 15.51 0.69
 3 0 -5 2.41 0.7
 3 0 -5 0.25 0.29
 -3 0 5 -0.42 0.33
 -3 0 5 0.62 0.74
 3 0 -4 7.8 0.5
 3 0 -4 8.14 0.34
 -3 0 4 10.3 0.51
 -3 0 4 8.19 0.36
 3 0 -3 0.18 0.29
 -3 0 3 1.08 0.35
 -3 0 3 -0.91 0.48
 3 0 -2 9.38 0.35
 3 0 -2 8.84 0.39
 -3 0 2 9.6 0.56
 -3 0 2 7.6 0.42
 3 0 -1 0.2 0.41
 3 0 -1 -0.66 0.33
 -3 0 1 0.29 0.29
 -3 0 1 -0.34 0.32
 3 0 0 13.4 0.46
 3 0 0 11.14 0.33
 -3 0 0 12.29 0.48
 -3 0 0 11.04 0.69
 3 0 1 0.04 0.42
 3 0 1 0.22 0.33
 -3 0 -1 1.68 0.4
 3 0 2 7.29 0.5
 -3 0 -2 4.32 0.79
 3 0 3 0.78 0.53
 -3 0 -3 0.28 0.49
 3 0 4 17.21 0.74
 -3 0 -4 16.23 0.7
 3 0 5 -0.41 0.67
 -3 0 -5 -0.22 0.57
 3 0 6 50 1.45
 -3 0 -6 44.96 1.78
 3 0 7 1.25 0.72
 -3 0 -7 1.07 0.68
 3 0 8 1.32 0.38
 -3 0 -8 -0.23 0.66
 3 0 9 0.33 0.66
 -3 0 -9 2.36 0.78
 -3 0 -9 0.35 0.74
 3 0 10 3.92 0.54
 -3 0 -10 3.71 0.91
 -3 0 -10 5.22 1.26
 3 0 11 0.01 0.85
 -3 0 -11 0.93 0.94
 -3 0 -11 1.96 0.92
 3 0 12 45.93 1.29
 -3 0 -12 53.14 1.84
 3 0 13 -0.7 1.09
 -3 0 -13 -0.66 1.06
 3 0 14 -0.45 0.79
 -3 0 -14 -0.3 1.09
 3 0 15 1.81 1.36
 -3 0 -15 2.29 1.22
 3 0 16 92.61 2.91
 -3 0 -16 104.89 3.52
 -3 0 -17 -2.05 1.41
 -3 0 -18 6.48 1.57
 -3 0 -19 1.05 1.55
 -3 0 -20 38.36 3.84
 -3 0 -21 -3.87 2.68
 -3 0 -22 34.29 2.71
 -3 0 -23 -2.29 1.86
 -3 0 -24 2.01 1.99
 -3 0 -25 3.97 2.1
 -3 0 -26 0.13 2.06
 -3 0 -27 0.23 3.37
 -3 0 -28 -2.93 2.29
 -3 0 -29 -1.41 2.25
 -3 0 -30 1.86 2.32
 3 -1 -30 -0.13 2.21
 3 -1 -29 1.99 2.24
 3 -1 -29 2.1 2.85
 -3 1 29 0.33 1.94
 3 -1 -28 -1.85 2.75
 -3 1 28 -0.31 1.92
 3 -1 -27 1.6 2.63
 -3 1 27 2.78 1.97
 3 -1 -26 12.84 2.92
 -3 1 26 14.7 3.69
 3 1 -25 2.16 1.31
 3 -1 -25 -1 2.3
 -3 1 25 4.19 1.83
 3 -1 -24 -1.04 2.06
 3 1 -24 0.38 0.84
 -3 1 24 0.47 2.6
 3 -1 -23 -1.46 1.93
 3 1 -23 0.36 0.79
 -3 1 23 2.17 1.6
 3 1 -22 2.96 1.57
 3 1 -22 1.89 1.17
 3 -1 -22 3.2 1.81
 -3 1 22 -1.75 2.3
 3 1 -21 -0.43 1.4
 3 1 -21 1.21 1.07
 3 -1 -21 0.43 1.74
 -3 1 21 1.87 1.44
 3 1 -20 0.59 0.66
 3 1 -20 1.82 1.27
 3 -1 -20 -0.59 1.61
 -3 1 20 0.96 1.35
 3 -1 -19 0.38 1.49
 3 1 -19 -0.41 1.13
 3 1 -19 0.87 0.88
 -3 1 19 -0.67 1.28
 3 -1 -18 1.22 1.34
 3 1 -18 -0.05 0.83
 3 1 -18 1.54 1
 -3 1 18 0.02 1.2
 3 1 -17 5.61 0.52
 3 1 -17 7.77 0.97
 3 -1 -17 6.19 2.14
 -3 1 17 9.19 1.28
 3 -1 -16 9.68 1.37
 3 1 -16 8.53 0.49
 3 1 -16 8.68 0.58
 -3 1 16 9.39 1.87
 3 -1 -15 0.12 1.17
 3 1 -15 3.46 0.56
 3 1 -15 3.98 0.68
 3 -1 -15 0.96 1.88
 -3 1 15 0.25 1.01
 3 -1 -14 4.47 1.08
 3 1 -14 4.27 0.41
 3 1 -14 4.26 0.53
 3 -1 -14 4.98 1.13
 -3 1 14 4.9 1
 3 -1 -13 17.93 1.27
 3 1 -13 19.99 0.41
 3 1 -13 19.02 0.64
 3 -1 -13 19.09 1.36
 -3 1 13 20.26 1.77
 3 -1 -12 -0.06 0.88
 3 1 -12 0.99 0.32
 3 1 -12 0.71 0.37
 3 -1 -12 -1 0.95
 -3 1 12 2.17 0.87
 3 1 -11 12.6 0.34
 3 -1 -11 15.11 1.04
 3 -1 -11 12.7 1.58
 -3 1 11 13.15 1.04
 -3 1 11 15.55 1.13
 3 1 -10 13.43 0.21
 3 -1 -10 13.61 1.04
 3 -1 -10 14.66 1.05
 3 1 -10 15.38 1.03
 -3 -1 10 13.69 1.05
 -3 -1 10 13.37 0.21
 -3 1 10 14.33 1
 -3 1 10 14.05 1.58
 3 1 -9 9.03 0.89
 3 -1 -9 6.52 1.26
 3 -1 -9 6.33 0.85
 -3 -1 9 5.63 0.14
 -3 -1 9 4.63 0.88
 -3 1 9 6.13 0.91
 -3 1 9 5.58 1.27
 3 -1 -8 53.21 1.57
 3 1 -8 55.45 1.55
 3 -1 -8 58.12 1.53
 -3 1 8 53.7 1.59
 -3 1 8 54.9 2.11
 -3 -1 8 55.49 0.44
 -3 -1 8 53.78 1.58
 3 -1 -7 3.06 0.69
 3 -1 -7 2.95 0.69
 -3 1 7 3.91 0.72
 -3 1 7 2.28 1.04
 -3 -1 7 1.2 0.65
 -3 -1 7 1.92 0.19
 3 1 -6 72.96 1.6
 3 -1 -6 79.09 2.24
 3 -1 -6 72.97 1.71
 -3 -1 6 72.78 0.74
 -3 -1 6 79.69 1.6
 -3 1 6 74.19 2.33
 -3 1 6 74.28 1.72
 3 -1 -5 72.43 1.58
 3 1 -5 75.04 1.47
 3 -1 -5 70.47 1.57
 -3 -1 5 72.63 1.47
 -3 -1 5 69.7 0.84
 -3 1 5 67.2 1.57
 -3 1 5 69.95 1.6
 3 -1 -4 96.03 1.89
 3 -1 -4 91.39 1.86
 -3 1 4 91.92 1.96
 -3 1 4 98.06 2.03
 -3 -1 4 93.47 2.09
 -3 -1 4 96.47 1.14
 3 -1 -3 422.58 10.12
 3 -1 -3 415.73 10.08
 -3 1 3 415.55 10.2
 -3 -1 3 413.86 8.56
 -3 -1 3 414.36 7.84
 -3 -1 3 416.09 9.28
 3 -1 -2 382.12 9.23
 -3 1 2 368.96 8.44
 -3 -1 2 360.84 7.85
 -3 -1 2 371.05 7.45
 -3 -1 2 376.81 7.03
 3 -1 -1 29.99 0.83
 -3 1 1 25.02 0.79
 -3 -1 1 27.57 0.52
 -3 -1 1 29.94 0.67
 -3 -1 1 29.35 0.78
 3 -1 0 6.49 0.55
 -3 1 0 6.05 0.57
 -3 -1 0 6.63 0.28
 -3 -1 0 6.07 0.47
 -3 -1 0 6.13 0.52
 3 -1 1 64.98 1.28
 -3 -1 -1 64 1.3
 -3 -1 -1 69.82 1.28
 -3 -1 -1 64.19 0.84
 -3 1 -1 65.74 1.36
 3 -1 2 16.66 0.99
 -3 1 -2 15.36 0.65
 -3 -1 -2 14.12 0.74
 -3 -1 -2 13.9 0.67
 -3 -1 -2 14.65 0.21
 3 -1 3 44.32 1.48
 -3 1 -3 39.69 1
 -3 -1 -3 45.17 1.48
 3 1 4 2.16 0.58
 3 -1 4 0.85 0.57
 -3 -1 -4 0.44 0.63
 -3 1 -4 0.7 0.59
 3 1 5 24.62 0.92
 3 -1 5 24.81 0.89
 -3 -1 -5 25.65 1.03
 -3 1 -5 24.14 0.85
 3 1 6 30.01 1.11
 3 -1 6 32.55 1.05
 -3 1 -6 29.69 1.39
 -3 -1 -6 31.29 0.38
 -3 -1 -6 32.89 1.21
 3 1 7 27.95 0.39
 3 1 7 25.82 1.09
 3 -1 7 27.72 1.04
 -3 1 -7 28.88 1.03
 -3 -1 -7 26.95 0.36
 -3 -1 -7 29.1 1.86
 3 1 8 1.81 0.4
 3 1 8 1.05 0.77
 3 -1 8 1.12 1.13
 -3 -1 -8 1.16 0.94
 -3 -1 -8 2.75 0.24
 -3 1 -8 4.06 1.1
 3 1 9 0.17 0.47
 3 -1 9 3.44 0.82
 -3 -1 -9 0.97 0.97
 -3 1 -9 -0.14 0.71
 3 1 10 0.53 0.37
 3 -1 10 0.55 0.89
 -3 -1 -10 0.82 1.02
 -3 1 -10 3.94 0.76
 3 -1 11 20.25 1.33
 3 1 11 17.33 0.91
 -3 1 -11 22.11 1.58
 -3 -1 -11 17.57 1.39
 3 1 12 2.52 0.78
 3 -1 12 2.92 1.1
 -3 1 -12 2.01 1.36
 -3 -1 -12 1.91 1.2
 3 1 13 0.39 0.92
 -3 -1 -13 0.71 1.23
 -3 1 -13 1.63 0.94
 3 1 14 4.18 1.09
 -3 -1 -14 4.27 1.41
 -3 1 -14 3.73 1.02
 3 1 15 3.37 1.24
 -3 1 -15 2.96 1.08
 -3 -1 -15 2.08 1.48
 3 1 16 0.62 1.34
 -3 -1 -16 1.42 2.4
 -3 1 -16 0.67 1.09
 3 1 17 2.84 1.45
 -3 -1 -17 -2.25 1.63
 -3 1 -17 1.01 1.16
 3 1 18 3.67 1.6
 -3 -1 -18 -0.03 1.81
 -3 1 -18 0.57 1.24
 -3 1 -19 3 1.39
 -3 -1 -19 3.15 1.95
 -3 1 -20 6.43 1.58
 -3 -1 -20 13.11 2.3
 -3 1 -21 3.46 1.5
 -3 -1 -21 -1.75 3.4
 -3 1 -22 3.79 1.63
 -3 -1 -22 0.31 2.13
 -3 -1 -23 9.19 2.55
 -3 1 -23 5.53 1.77
 -3 1 -24 -3.28 2.54
 -3 -1 -24 2.99 2.35
 -3 -1 -25 1.79 2.56
 -3 1 -25 2.46 2.85
 -3 1 -26 4.66 2.88
 -3 -1 -26 1.85 3.91
 -3 1 -27 2.24 1.89
 -3 -1 -27 1.66 2.79
 -3 -1 -28 0.82 2.74
 -3 1 -28 -1.22 1.86
 -3 -1 -29 0.15 2.77
 -3 1 -29 0.77 1.9
 -3 -1 -30 4.68 4.55
 -3 -1 -31 3.24 2.84
 -3 -1 -32 -2.75 2.89
 3 -2 -33 2.07 3.31
 3 -2 -32 1.59 3.13
 -3 2 32 1.71 2.74
 3 -2 -31 -0.07 2.95
 -3 2 31 2.86 2.65
 3 -2 -30 0.6 4.37
 -3 2 30 0.57 4.11
 3 -2 -29 1.31 2.76
 -3 2 29 2.71 2.56
 3 -2 -28 -3.11 2.68
 -3 2 28 0.15 2.51
 3 -2 -27 3.43 4.13
 -3 2 27 2.87 2.45
 3 -2 -26 4.45 2.6
 -3 2 26 3.15 2.36
 3 -2 -25 0.95 2.31
 -3 2 25 2.15 3.42
 3 -2 -24 7.3 3.64
 -3 2 24 7.74 2.26
 3 -2 -23 35.77 3.19
 -3 2 23 41.54 3.2
 3 2 -22 3.84 0.52
 3 -2 -22 8.36 3.07
 -3 2 22 1.7 2.03
 3 2 -21 0.17 0.39
 3 2 -21 1.33 0.41
 3 -2 -21 -0.54 1.77
 -3 2 21 -0.46 1.81
 3 -2 -20 -1.52 1.7
 -3 2 20 -5.69 2.88
 3 -2 -19 -0.01 1.53
 -3 2 19 2.43 1.71
 3 -2 -18 3.26 1.49
 -3 2 18 3.6 2.58
 3 -2 -17 9.47 1.57
 -3 2 17 8.69 1.7
 3 -2 -16 27.12 1.89
 -3 2 16 31.26 3.02
 3 -2 -15 20.72 1.63
 -3 2 15 18.22 1.79
 3 -2 -14 4.74 1.22
 -3 2 14 2.6 2.09
 3 -2 -13 19.06 1.45
 -3 2 13 18.4 1.64
 3 -2 -12 43.79 2.72
 -3 2 12 40.52 2.06
 3 -2 -11 62.1 2.19
 -3 2 11 62.09 2.36
 3 -2 -10 5.52 1.08
 -3 2 10 7.49 1.25
 3 -2 -9 15.74 1.48
 3 -2 -9 20.07 1.2
 -3 2 9 17.91 2.13
 3 -2 -8 5.91 1.45
 3 -2 -8 8.83 1.18
 -3 2 8 6.3 1.2
 -3 -2 8 7.08 0.27
 -3 -2 8 6.99 1.03
 3 -2 -7 8.29 1.16
 3 2 -7 9.26 0.38
 3 -2 -7 5.8 1.44
 -3 2 7 10.06 1.11
 -3 -2 7 8.14 0.45
 3 -2 -6 54.28 1.81
 3 -2 -6 51.65 1.73
 3 2 -6 53.61 0.91
 -3 2 6 53.66 2.77
 -3 -2 6 50.48 0.83
 3 -2 -5 45.42 1.62
 3 -2 -5 42.73 1.55
 3 2 -5 41.1 0.71
 -3 2 5 41.89 1.65
 -3 -2 5 40.81 0.78
 3 -2 -4 155.55 3.94
 3 2 -4 157.38 2.85
 -3 2 4 152.28 4.02
 -3 -2 4 147.07 2.59
 3 -2 -3 29.32 1.85
 3 2 -3 26.44 1.03
 -3 2 3 27.09 1.3
 -3 -2 3 28.12 0.77
 3 -2 -2 250.81 6.24
 3 2 -2 247.06 4.87
 -3 2 2 239.81 6.13
 -3 -2 2 247.17 5.87
 3 -2 -1 156.17 3.68
 3 2 -1 145.66 2.88
 -3 2 1 172.65 4.88
 -3 -2 1 153.38 3.15
 3 -2 0 135.28 3.08
 3 2 0 134.86 2.8
 -3 -2 0 143.73 3
 -3 2 0 136.93 3.25
 3 2 1 24.89 1.38
 3 -2 1 24.9 1.02
 -3 -2 -1 20.62 1.02
 -3 2 -1 23.45 1.07
 3 2 2 47.05 1.94
 3 -2 2 50.27 1.44
 -3 -2 -2 48.5 2.11
 -3 2 -2 48.83 1.46
 3 -2 3 21.45 0.94
 3 2 3 23.16 1.53
 -3 -2 -3 20.31 1.73
 -3 2 -3 20.08 0.97
 3 -2 4 1.03 0.66
 -3 2 -4 0.9 1.07
 -3 -2 -4 0.63 0.88
 3 -2 5 67.86 1.83
 3 2 5 67.97 1.98
 -3 2 -5 64.44 1.74
 -3 -2 -5 69.94 2.26
 3 2 6 74.11 2.21
 3 -2 6 68.8 1.87
 -3 -2 -6 68.46 2.57
 -3 -2 -6 70.91 1.11
 -3 2 -6 75.79 1.88
 3 2 7 -1.22 0.95
 3 -2 7 -0.43 0.79
 -3 -2 -7 1.58 0.52
 -3 2 -7 0.04 0.76
 3 2 8 1.34 1.04
 3 -2 8 0.21 0.8
 -3 -2 -8 -1.02 0.54
 -3 2 -8 0.59 0.78
 3 2 9 3.06 1.64
 3 -2 9 0.83 0.87
 -3 -2 -9 1.4 0.6
 -3 2 -9 2.36 0.82
 3 2 10 3.26 1.22
 3 -2 10 3.86 0.99
 -3 -2 -10 4.95 0.45
 -3 2 -10 3.76 0.9
 3 -2 11 5.06 1.63
 3 2 11 9.55 1.38
 -3 -2 -11 6.73 0.54
 -3 2 -11 7.22 0.93
 3 -2 12 3.63 1.6
 3 2 12 4.21 1.32
 -3 -2 -12 2.25 0.56
 -3 2 -12 2.46 1.49
 3 2 13 34.24 2.11
 -3 -2 -13 34.76 1.02
 -3 2 -13 31.16 1.56
 3 2 14 8.67 2.3
 3 2 14 2.1 1.27
 -3 2 -14 2.49 1.08
 -3 -2 -14 3.89 1.01
 3 2 15 1.68 1.45
 3 2 15 2.76 0.86
 -3 2 -15 0.28 1.14
 -3 -2 -15 1.75 1.06
 3 2 16 6.44 1.52
 3 2 16 3.29 1.54
 -3 -2 -16 3.83 0.82
 -3 2 -16 3.18 1.92
 3 2 17 14.49 1.32
 3 2 17 17.79 2.01
 -3 -2 -17 15.57 1.6
 -3 2 -17 20.32 2.23
 3 2 18 4.29 1.69
 3 2 18 2.34 1.11
 -3 2 -18 2.94 1.31
 -3 -2 -18 1.45 0.93
 3 2 19 9.76 1.4
 3 2 19 15.16 2.12
 -3 -2 -19 12.32 1.22
 -3 2 -19 13.14 1.59
 -3 2 -20 4.18 1.48
 -3 -2 -20 3.72 2.23
 -3 -2 -21 1.38 2.32
 -3 2 -21 2.36 1.48
 -3 -2 -22 33.67 3.7
 -3 2 -22 29.33 2.21
 -3 2 -23 0.87 1.56
 -3 -2 -23 1.45 2.61
 -3 2 -24 0.85 1.64
 -3 -2 -24 1.87 4.49
 -3 -2 -25 11.22 3.32
 -3 2 -25 7.55 1.86
 -3 -2 -26 -2.66 2.99
 -3 2 -26 2.41 2.39
 -3 -2 -27 8.34 3.44
 -3 -2 -28 3.71 4.82
 -3 -2 -29 3.05 3.3
 -3 -2 -30 -0.43 3.32
 -3 -2 -31 -6.34 3.71
 -3 -2 -32 -14.5 6.48
 -3 -2 -33 -2.96 3.76
 3 -3 -33 8.74 5.27
 -3 3 33 0.08 4.93
 3 -3 -32 -2.01 3.06
 -3 3 32 -3.59 3.26
 3 -3 -31 -5.99 3.08
 -3 3 31 -2.55 3.26
 3 -3 -30 0.27 4.57
 -3 3 30 8.81 4.88
 3 -3 -29 6.8 2.86
 -3 3 29 1.24 2.99
 3 -3 -28 5.37 4.5
 -3 3 28 7.46 3.01
 3 -3 -27 -5.89 2.73
 -3 3 27 4.81 4.33
 3 -3 -26 2.21 2.64
 -3 3 26 4.88 2.82
 3 -3 -25 -0.26 2.38
 -3 3 25 3.05 2.56
 3 -3 -24 3.54 2.46
 -3 3 24 10.72 2.71
 3 -3 -23 6.26 3.51
 -3 3 23 6.02 2.53
 3 -3 -22 5.01 2.17
 -3 3 22 8.33 3.88
 3 -3 -21 -0.14 2.93
 -3 3 21 -1.07 2.33
 3 -3 -20 1.27 1.82
 -3 3 20 3.44 2.31
 3 -3 -19 1.01 2.69
 -3 3 19 -1.65 2.02
 3 -3 -18 5.74 1.82
 -3 3 18 6.41 2.07
 3 -3 -17 1.37 2.47
 -3 3 17 -4.65 2.91
 3 -3 -16 0.7 1.5
 -3 3 16 -1.59 1.82
 3 -3 -15 -3.04 1.46
 -3 3 15 1.75 1.71
 3 -3 -14 -3 1.38
 -3 3 14 -0.53 1.68
 3 -3 -13 7.45 1.47
 -3 3 13 6.52 1.81
 3 -3 -12 9.61 1.61
 3 3 -12 11.92 0.32
 -3 3 12 15.99 1.93
 -3 -3 12 14.07 0.42
 3 -3 -11 1.51 1.27
 3 3 -11 0.2 0.4
 -3 3 11 -0.59 1.55
 -3 -3 11 1.27 0.43
 3 3 -10 31.58 0.86
 3 -3 -10 28.22 1.84
 -3 3 10 35.64 2.33
 -3 -3 10 31.74 0.71
 3 -3 -9 26.02 1.72
 3 3 -9 24.63 0.91
 -3 3 9 25.7 2.09
 -3 -3 9 23.75 0.98
 3 -3 -8 9.79 2.01
 3 3 -8 3.96 0.51
 -3 3 8 2.08 1.54
 -3 -3 8 5.29 0.56
 3 -3 -7 3.81 1.29
 3 3 -7 2.07 0.53
 -3 3 7 2.61 1.48
 -3 -3 7 3.26 0.9
 3 3 -6 0.77 0.58
 -3 3 6 1.57 1.33
 -3 -3 6 0.39 0.63
 3 3 -5 64.77 1.51
 -3 3 5 62.02 2.77
 -3 -3 5 63.18 1.69
 3 3 -4 78.57 1.83
 -3 3 4 74.65 2.98
 -3 -3 4 71.06 2
 3 3 -3 22.67 1.02
 -3 3 3 20.82 1.62
 -3 -3 3 20.04 1.11
 3 3 -2 71.6 1.9
 -3 3 2 69.61 2.65
 -3 -3 2 69.4 2.16
 3 3 -1 32.03 1.95
 -3 3 1 31.73 2.61
 -3 -3 1 33.29 1.5
 3 3 0 2.16 1.29
 -3 3 0 0.65 1.12
 -3 -3 0 0.8 1
 3 3 1 17.41 1.17
 -3 3 -1 16.35 2.03
 -3 -3 -1 14.17 1.98
 3 -3 2 1.1 1.04
 3 3 2 3.03 0.96
 -3 3 -2 3.55 1.07
 3 -3 3 20.07 1.28
 3 3 3 19.3 1.32
 -3 3 -3 15.2 1.33
 3 -3 4 24.65 1.38
 3 3 4 23.75 1.53
 -3 3 -4 19.3 1.45
 3 -3 5 1.37 0.96
 3 3 5 -4.02 1.76
 -3 3 -5 -0.28 1.02
 3 -3 6 18.08 1.92
 3 3 6 17.89 1.49
 -3 3 -6 19.97 1.31
 3 -3 7 6.53 1.79
 3 3 7 8.96 1.45
 -3 3 -7 9.44 1.17
 3 -3 8 6.75 1.79
 3 3 8 4.32 1.46
 -3 3 -8 3.34 1.11
 -3 -3 -8 6.37 0.76
 3 3 9 7.9 1.55
 -3 3 -9 7.12 1.14
 -3 -3 -9 5.61 1.1
 3 3 10 16.51 2.82
 -3 3 -10 17.35 1.41
 -3 -3 -10 17.86 0.96
 3 3 11 28.62 2.12
 -3 3 -11 30.43 2.39
 -3 -3 -11 27.46 1.6
 3 3 12 5.4 1.64
 -3 3 -12 4.73 1.23
 -3 -3 -12 7.76 1.24
 3 3 13 1.67 1.66
 -3 3 -13 1.61 1.22
 -3 -3 -13 1.67 1.24
 3 3 14 2.12 1.79
 -3 3 -14 6.12 1.95
 -3 -3 -14 2.52 1.31
 3 3 15 6.05 2.81
 -3 3 -15 3.92 2.06
 -3 -3 -15 1.21 1.35
 3 3 16 -0.78 1.92
 -3 3 -16 1.29 1.33
 -3 -3 -16 0.78 1.41
 3 3 17 1.05 2.02
 -3 3 -17 0.88 1.37
 -3 -3 -17 0.73 1.01
 3 3 18 35.94 3.08
 -3 3 -18 29.42 2.13
 -3 -3 -18 28.03 1.58
 3 3 19 3.27 2.35
 -3 3 -19 3.53 1.55
 -3 -3 -19 3.41 1.73
 3 3 20 3.23 3.21
 -3 3 -20 4.61 2.37
 -3 -3 -20 0.16 1.11
 3 3 21 7.65 2.48
 -3 3 -21 5.49 2.48
 -3 -3 -21 4.99 1.27
 3 3 22 -0.08 2.42
 -3 3 -22 1.51 2.37
 -3 -3 -22 2.15 1.82
 3 3 23 4.78 2.6
 -3 3 -23 1.99 2.5
 -3 -3 -23 3.29 1.26
 3 3 24 5.64 2.75
 -3 3 -24 3 2.5
 -3 -3 -25 10.01 3.58
 -3 -3 -26 4.65 3.47
 -3 -3 -27 -4.02 3.51
 -3 -3 -28 -11.05 5.88
 -3 -3 -29 -7.79 3.99
 -3 -3 -30 17.05 4.53
 -3 -3 -31 -4.06 4.14
 -3 -3 -32 16.83 7.58
 -3 4 32 -3.23 5.69
 3 -4 -31 -0.29 2.99
 -3 4 31 1.78 3.45
 3 -4 -30 0.67 2.93
 -3 4 30 -2.22 3.3
 3 -4 -29 3.98 3
 -3 4 29 8.43 5.28
 3 -4 -28 0.87 4.4
 -3 4 28 8.78 3.4
 3 -4 -27 2.41 2.71
 -3 4 27 -5.6 3.17
 3 -4 -26 2.12 4.05
 -3 4 26 -6.1 4.7
 3 -4 -25 3.69 2.48
 -3 4 25 -3.11 3.11
 3 -4 -24 -0.25 3.91
 -3 4 24 -5.13 3.08
 3 -4 -23 16.88 2.86
 -3 4 23 16.63 5.41
 3 -4 -22 2.93 2.22
 -3 4 22 -4.34 2.89
 3 -4 -21 8.18 2.5
 -3 4 21 8.57 3.06
 3 -4 -20 2.11 3.33
 -3 4 20 3.86 4.31
 3 -4 -19 2.91 2.08
 -3 4 19 -1.03 2.53
 3 -4 -18 3.53 3.07
 -3 4 18 1.59 2.48
 3 -4 -17 3.71 1.92
 -3 4 17 -0.7 2.4
 3 -4 -16 12.59 3.5
 -3 4 16 17.74 2.8
 3 -4 -15 4.69 1.83
 3 4 -15 1.61 0.41
 -3 4 15 3.74 2.29
 -3 -4 15 2.71 0.48
 3 -4 -14 2.8 1.83
 3 4 -14 1.5 0.65
 -3 4 14 2.18 2.2
 -3 -4 14 0.74 0.7
 3 -4 -13 6.02 2.73
 3 4 -13 2.69 0.58
 -3 4 13 6.26 2.2
 -3 -4 13 3.3 0.58
 3 -4 -12 7.44 1.88
 3 4 -12 8.55 1.01
 -3 4 12 8.32 3.52
 -3 -4 12 6.62 1.04
 3 -4 -11 12.88 1.94
 3 4 -11 8.9 1.19
 -3 4 11 10.31 2.25
 -3 -4 11 10.98 1.3
 3 -4 -10 -1.19 1.63
 3 4 -10 0.58 0.72
 -3 4 10 -1.01 1.91
 -3 -4 10 -0.66 0.75
 3 -4 -9 9.03 1.84
 3 4 -9 8.13 0.87
 -3 4 9 8.41 2.17
 -3 -4 9 6.7 1.45
 3 4 -8 15.87 1.05
 -3 4 8 15.81 2.32
 -3 -4 8 13.84 1.79
 3 4 -7 2.08 0.92
 -3 4 7 8.64 3.02
 -3 -4 7 6.38 1.08
 3 4 -6 6.5 1
 -3 4 6 10.29 1.97
 -3 -4 6 6.84 1.71
 3 4 -5 0.94 0.99
 -3 4 5 1.6 1.78
 -3 -4 5 0.72 1.73
 3 4 -4 73.68 2.35
 -3 4 4 66.75 3.43
 -3 -4 4 62.82 2.58
 3 4 -3 139.29 5.37
 -3 4 3 132.6 5.55
 3 4 -2 31.58 2.51
 -3 4 2 30.15 3.55
 3 4 -1 54.12 2.25
 -3 4 1 51.52 2.9
 3 4 0 15.8 1.52
 -3 4 0 11.53 1.85
 3 4 1 1.43 1.27
 -3 4 -1 1.89 1.54
 3 4 2 30.05 2
 -3 4 -2 29.96 2.17
 3 4 3 24.62 1.96
 -3 4 -3 31.77 3.11
 3 4 4 19.02 2.84
 -3 4 -4 24.37 1.91
 3 4 5 22.02 2.06
 -3 4 -5 27.02 1.99
 3 4 6 10.59 1.73
 -3 4 -6 9.63 1.59
 3 4 7 0.72 1.62
 -3 4 -7 3.93 1.48
 3 4 8 6.93 1.8
 -3 4 -8 8.47 2.4
 3 4 9 5.32 2.66
 -3 4 -9 1.83 1.46
 3 4 10 2.38 1.83
 -3 4 -10 4.14 1.53
 -3 -4 -10 7.52 1.76
 3 4 11 1.8 1.98
 -3 4 -11 7.44 2.34
 -3 -4 -11 2.53 1.65
 3 4 12 10.03 2.29
 -3 4 -12 10.19 1.65
 -3 -4 -12 7.31 1.22
 3 4 13 5.28 2.14
 -3 4 -13 1.73 1.59
 -3 -4 -13 3.94 1.11
 3 4 14 4.94 3.25
 -3 4 -14 1.71 1.67
 -3 -4 -14 4.32 1.15
 3 4 15 2.65 2.38
 -3 4 -15 2.46 2.74
 -3 -4 -15 7.89 1.28
 3 4 16 5.83 2.32
 -3 4 -16 3.53 2.53
 -3 -4 -16 -0.41 1.2
 3 4 17 3.71 2.28
 -3 4 -17 -3.58 1.7
 -3 -4 -17 0.72 1.79
 3 4 18 1.84 3.89
 -3 4 -18 5.8 1.89
 -3 -4 -18 7.33 2.07
 3 4 19 4.21 2.61
 -3 4 -19 1.89 1.79
 -3 -4 -19 0.02 1.33
 3 4 20 4.44 3.03
 -3 4 -20 8.77 2.07
 -3 -4 -20 8.21 1.44
 3 4 21 2.47 2.8
 -3 4 -21 0.46 1.79
 -3 -4 -21 -0.21 1.29
 3 4 22 2.56 3.03
 -3 4 -22 5.03 2.93
 3 4 23 -3.94 4.48
 3 4 24 12.43 3.37
 3 4 25 3.73 2.94
 3 4 26 -0.57 3.04
 3 4 27 2.76 3.21
 -3 -4 -28 2.18 3.75
 -3 -4 -29 6.28 4.09
 -3 -4 -30 -4.69 4.06
 -3 -4 -31 -8.91 7.08
 -3 5 31 0.09 3.86
 -3 5 30 4.43 6.01
 3 -5 -29 -4.43 2.93
 -3 5 29 7.09 3.59
 3 -5 -28 0.85 4.23
 3 -5 -28 4.45 4.37
 -3 5 28 -3.53 3.54
 3 -5 -27 -0.36 2.7
 -3 5 27 4.81 5.3
 3 -5 -26 3.83 4.3
 -3 5 26 9.79 3.75
 3 -5 -25 2.76 2.75
 -3 5 25 13.22 3.63
 3 -5 -24 2.43 4.06
 -3 5 24 5.63 3.49
 3 -5 -23 -4.37 2.61
 -3 5 23 2.41 3.43
 3 -5 -22 5.76 4.16
 -3 5 22 5.27 3.72
 3 -5 -21 5.87 2.71
 -3 5 21 3.49 3.44
 3 -5 -20 1.26 3.85
 -3 5 20 2.07 3.25
 3 -5 -19 4.68 2.49
 -3 5 19 4.55 3.2
 3 -5 -18 0.2 3.66
 -3 5 18 -1.95 3
 3 -5 -17 -0.28 2.35
 -3 5 17 -1.17 4.56
 3 -5 -16 -5.89 3.69
 -3 5 16 -2.42 3.04
 3 -5 -15 -1.98 2.29
 3 5 -15 1.19 0.8
 -3 5 15 -0.85 2.69
 3 -5 -14 2.4 2.17
 3 5 -14 0.53 1.37
 -3 5 14 3.15 3.91
 3 -5 -13 6.71 2.19
 3 5 -13 3.38 1.62
 -3 5 13 4.77 2.81
 -3 -5 13 4 1.51
 3 -5 -12 12.67 2.35
 3 5 -12 4.14 1.15
 -3 -5 12 4.4 1.09
 -3 5 12 4.73 2.73
 3 -5 -11 7.23 3.38
 3 5 -11 2.98 1.11
 -3 -5 11 1.37 1.1
 -3 5 11 11.16 4.08
 3 -5 -10 4.13 2.16
 3 5 -10 0.26 1.12
 -3 5 10 1.98 2.44
 -3 -5 10 -1.21 1.17
 3 5 -9 -0.52 1.18
 -3 5 9 -0.67 2.42
 3 5 -8 2.45 1.28
 -3 5 8 2.81 3.77
 3 5 -7 9.79 1.45
 -3 5 7 7.64 2.64
 3 5 -6 1.47 1.32
 -3 5 6 3.87 2.29
 3 5 -5 -1.08 1.38
 -3 5 5 3.13 3.37
 3 5 -4 4.75 1.47
 -3 5 4 5.26 2.43
 3 5 -3 3.79 1.53
 -3 5 3 5.39 2.36
 3 5 -2 3.2 2.43
 -3 5 2 6.35 3.47
 3 5 -1 9.16 2.69
 -3 5 1 8.83 2.43
 3 5 0 7.25 1.77
 -3 5 0 9.51 2.26
 3 5 1 12.87 2.01
 -3 5 -1 12.13 3.52
 3 5 2 20.61 2.33
 -3 5 -2 24.01 2.59
 3 5 3 10.56 2
 -3 5 -3 5.83 2.17
 3 5 4 0.48 1.9
 -3 5 -4 -0.82 1.89
 3 5 5 3.3 3.26
 -3 5 -5 10.6 3.23
 3 5 6 1.58 2.07
 -3 5 -6 5.41 1.99
 3 5 7 11.25 2.3
 -3 5 -7 9.92 2.25
 3 5 8 1.31 2.13
 -3 5 -8 3.19 3.03
 3 5 9 1.98 2.39
 -3 5 -9 8.9 3.14
 3 5 10 7 2.32
 -3 5 -10 4.17 2.1
 3 5 11 6.44 3.52
 -3 5 -11 -0.25 1.89
 -3 -5 -11 -2.79 2.32
 3 5 12 8.99 2.93
 -3 5 -12 13.61 2.38
 -3 -5 -12 15.35 1.82
 3 5 13 12.23 2.72
 -3 5 -13 4.76 3.3
 -3 -5 -13 5.9 1.63
 3 5 14 -5.27 2.68
 -3 5 -14 -0.58 3.14
 -3 -5 -14 0.43 1.51
 3 5 15 0.89 2.68
 -3 5 -15 5.1 2.11
 -3 -5 -15 0.15 1.49
 3 5 16 -1.4 4.14
 -3 5 -16 4.09 2.09
 -3 -5 -16 2.06 1.49
 3 5 17 5.18 2.94
 -3 5 -17 1.85 2.17
 -3 -5 -17 2.01 1.54
 3 5 18 6.18 2.97
 -3 5 -18 1.07 2.18
 -3 -5 -18 2.61 2.37
 3 5 19 6.24 3.14
 -3 5 -19 5.07 2.22
 -3 -5 -19 1.8 2.54
 3 5 20 4.2 3.28
 3 5 21 0.2 4.91
 3 5 22 1.99 3.21
 3 5 23 3.62 3.37
 3 5 24 6.14 3.55
 3 5 25 6.93 5.78
 3 5 26 3.55 3.45
 3 5 27 -0.49 3.33
 3 5 28 -1.49 3.51
 3 5 29 6.78 3.96
 -3 6 28 4.39 4.28
 -3 6 27 1.43 6.15
 3 -6 -26 0.83 2.88
 -3 6 26 6.09 4.01
 3 -6 -25 0.58 2.91
 -3 6 25 6.84 3.8
 3 -6 -24 4.47 2.92
 -3 6 24 6.5 5.78
 3 -6 -23 7.24 3.1
 -3 6 23 6.49 4.3
 3 -6 -22 0.57 2.85
 -3 6 22 9.1 3.92
 3 -6 -21 0.2 2.71
 -3 6 21 0.17 3.71
 3 -6 -20 1.01 2.75
 -3 6 20 0.68 5.5
 3 -6 -19 1.46 2.78
 -3 6 19 -5.12 3.6
 3 -6 -18 13.76 3.29
 -3 6 18 11.18 4.21
 3 -6 -17 10.66 3.16
 -3 6 17 -0.42 5.92
 3 -6 -16 -1.25 2.92
 -3 6 16 -4.06 3.51
 3 -6 -15 1.05 2.73
 -3 6 15 5.66 3.52
 3 -6 -14 -1.11 2.6
 -3 6 14 3.36 3.27
 3 -6 -13 4.24 2.93
 3 6 -13 5.74 2.32
 -3 6 13 3.4 5.26
 3 -6 -12 5.19 4.39
 3 6 -12 3.77 2.39
 -3 6 12 -0.01 3.24
 3 -6 -11 5.4 2.82
 3 6 -11 1.88 2.5
 -3 6 11 0.69 3.21
 3 -6 -10 4.56 4.26
 3 6 -10 2.57 2.53
 -3 6 10 -0.65 3.03
 3 6 -9 14.32 2.01
 -3 6 9 17.83 3.63
 3 6 -8 0.48 1.69
 -3 6 8 0.47 2.75
 3 6 -7 10.4 1.99
 -3 6 7 11.57 3.32
 3 6 -6 13.23 2.15
 -3 6 6 10.92 5.1
 3 6 -5 -0.16 1.86
 -3 6 5 5.03 2.85
 3 6 -4 0.73 2.84
 -3 6 4 -1.11 2.76
 3 6 -3 9.84 3.46
 -3 6 3 10.89 3.2
 3 6 -2 21.32 3.86
 -3 6 2 16.77 5.38
 3 6 -1 0.98 2.09
 -3 6 1 1.14 2.78
 3 6 0 6.48 2.3
 -3 6 0 5.22 2.97
 3 6 1 5.07 2.27
 -3 6 -1 -0.09 2.83
 3 6 2 4.32 2.32
 -3 6 -2 5.6 4.26
 3 6 3 -2.51 2.4
 -3 6 -3 -0.75 2.51
 3 6 4 7.06 2.58
 -3 6 -4 3.32 2.67
 3 6 5 8.61 4.07
 -3 6 -5 3.31 2.68
 3 6 6 27.02 4.85
 -3 6 -6 19.56 3.39
 3 6 7 15.53 3.06
 -3 6 -7 6.63 4.65
 3 6 8 11.24 2.77
 -3 6 -8 -0.51 2.76
 3 6 9 8.98 3.12
 -3 6 -9 8.85 2.89
 3 6 10 -6.31 2.78
 -3 6 -10 4.19 2.56
 3 6 11 5.88 4.45
 -3 6 -11 0.24 2.57
 -3 -6 -11 1.37 2.03
 3 6 12 11.4 4.61
 -3 6 -12 4.54 4.31
 -3 -6 -12 1.26 3.06
 3 6 13 -1.96 3.07
 -3 6 -13 -4.36 3.93
 -3 -6 -13 2.55 2.88
 3 6 14 5.99 3.2
 -3 6 -14 -4.37 3.97
 -3 -6 -14 2.78 1.78
 3 6 15 -1.09 3.11
 -3 6 -15 -1.21 2.58
 -3 -6 -15 2.64 1.77
 3 6 16 -4.14 3.21
 -3 6 -16 0.04 2.49
 -3 -6 -16 0.44 1.74
 3 6 17 4.03 5.22
 -3 6 -17 4.08 2.58
 3 6 18 -1.66 3.44
 3 6 19 -2.41 3.42
 3 6 20 3.22 3.52
 3 6 21 3.37 3.74
 3 6 22 9.59 6.31
 3 6 23 -10.31 4.05
 3 6 24 2.85 3.91
 3 6 25 0.05 3.81
 3 6 26 15.27 7.08
 3 -7 -24 -0.56 3.3
 -3 7 24 -0.99 4.18
 3 -7 -23 1.19 3.08
 -3 7 23 0.35 6.74
 3 -7 -22 -1.79 3.13
 -3 7 22 -3.75 4.25
 3 -7 -21 2.39 3.06
 -3 7 21 7.86 4.4
 3 -7 -20 2.85 3.2
 -3 7 20 6.02 4.37
 3 -7 -19 1.35 3.06
 -3 7 19 2.58 6.22
 3 -7 -18 -1.07 3.27
 -3 7 18 -4.72 3.98
 3 -7 -17 -2.81 3.31
 -3 7 17 10.61 4.01
 3 -7 -16 1.33 3.22
 -3 7 16 4.08 3.9
 3 -7 -15 -4.27 3.26
 -3 7 15 0.15 6.16
 3 -7 -14 5.16 3.42
 -3 7 14 6.38 4.08
 3 -7 -13 0.05 3.27
 -3 7 13 4.53 3.86
 3 -7 -12 0.33 3.48
 -3 7 12 2.69 3.67
 3 -7 -11 -2.22 3.33
 3 7 -11 0.27 2.03
 -3 7 11 0.14 5.6
 3 7 -10 1.72 2.21
 -3 7 10 4.52 3.83
 3 7 -9 0.92 2.14
 -3 7 9 -6.06 3.63
 3 7 -8 3.4 2.35
 -3 7 8 8.05 3.77
 3 7 -7 1.96 2.3
 -3 7 7 6.62 5.41
 3 7 -6 2.54 2.47
 -3 7 6 4.29 3.58
 3 7 -5 2.66 2.39
 -3 7 5 1.2 3.45
 3 7 -4 6.2 2.64
 -3 7 4 5.16 3.67
 3 7 -3 4.11 2.75
 -3 7 3 12.7 3.66
 3 7 -2 1.72 2.47
 -3 7 2 -2.34 5.33
 3 7 -1 0.97 2.48
 -3 7 1 -0.47 3.38
 3 7 0 0.7 2.83
 -3 7 0 10.21 3.6
 3 7 1 1.5 2.91
 -3 7 -1 2.51 3.38
 3 7 2 12.29 3.25
 -3 7 -2 9.42 3.94
 3 7 3 1.45 3.07
 -3 7 -3 6.06 5.27
 3 7 4 8.27 4.56
 -3 7 -4 -1.67 3.48
 3 7 5 1.89 4.59
 -3 7 -5 1.25 3.27
 3 7 6 -2.85 3.03
 -3 7 -6 0.35 3.43
 3 7 7 5.42 3.26
 -3 7 -7 2.31 3.47
 3 7 8 1.33 3.29
 -3 7 -8 4.28 3.36
 3 7 9 -1.42 3.21
 -3 7 -9 9 5.05
 3 7 10 2.05 3.39
 -3 7 -10 0.41 4.78
 3 7 11 -3.79 5.27
 -3 7 -11 8.94 4.96
 -3 -7 -11 2.76 3.58
 3 7 12 12.58 3.55
 -3 7 -12 7.42 3.19
 -3 -7 -12 1.4 2.44
 3 7 13 -2.6 3.54
 -3 7 -13 -2.43 2.98
 -3 -7 -13 -0.66 2.22
 3 7 14 -6.14 3.59
 -3 -7 -14 2.57 3.42
 -3 7 -14 -0.84 2.93
 3 7 15 -6.52 3.81
 3 7 16 -0.87 3.68
 3 7 17 0.98 5.59
 3 7 18 5.82 3.86
 3 7 19 2.54 3.84
 3 7 20 -2.29 3.89
 3 7 21 1.7 3.93
 3 7 22 5.75 6.58
 3 7 23 1.52 4.14
 3 -8 -20 5.69 3.45
 -3 8 20 0.26 4.92
 3 -8 -19 -0.73 5.04
 -3 8 19 -0.26 4.57
 3 -8 -18 -0.17 3.42
 -3 8 18 3.19 6.79
 3 -8 -17 8.08 5.72
 -3 8 17 4.41 4.75
 3 -8 -16 5.56 3.74
 -3 8 16 7.55 4.64
 3 -8 -15 -1.12 3.47
 -3 8 15 4.97 4.18
 3 -8 -14 7.22 3.85
 -3 8 14 5.11 4.56
 3 -8 -13 -0.87 3.53
 -3 8 13 0.38 6.41
 3 -8 -12 9.03 4.02
 -3 8 12 3.24 4.41
 3 -8 -11 -3.39 3.93
 -3 8 11 -2.04 4.24
 -3 8 10 2.88 4.12
 -3 8 9 2.64 6.45
 3 8 -8 0.73 2.76
 -3 8 8 5.17 6.33
 3 8 -7 7.26 3.01
 -3 8 7 7.98 4.52
 3 8 -6 1.34 2.74
 -3 8 6 -0.18 4.13
 3 8 -5 2.61 2.86
 -3 8 5 1.71 4.1
 3 8 -4 -1.18 2.95
 -3 8 4 -2 3.99
 3 8 -3 1.49 2.93
 -3 8 3 7.55 6.33
 3 8 -2 2.78 3.05
 -3 8 2 -0.25 3.91
 3 8 -1 2.89 3.28
 -3 8 1 6.03 3.99
 3 8 0 -0.6 5.17
 -3 8 0 7.54 3.96
 3 8 1 8.41 5.29
 -3 8 -1 4.99 4.04
 3 8 2 1.74 4.68
 -3 8 -2 -1.51 3.8
 3 8 3 6.08 3.38
 -3 8 -3 1.15 6.18
 3 8 4 3.74 3.44
 -3 8 -4 7.98 6.45
 3 8 5 2.8 3.58
 -3 8 -5 8.63 4.06
 3 8 6 0 3.49
 -3 8 -6 -2.45 3.77
 3 8 7 7.45 3.93
 -3 8 -7 11.94 4.25
 3 8 8 4.34 3.59
 -3 8 -8 -6.53 3.66
 3 8 9 9.88 3.94
 -3 8 -9 2.35 4.01
 3 8 10 -0.28 5.65
 -3 8 -10 2.31 3.61
 3 8 11 4.29 3.71
 -3 8 -11 6.2 3.6
 -3 -8 -11 -1.68 2.91
 3 8 12 -6.27 4.02
 3 8 13 -3.22 3.99
 3 8 14 5.78 4.14
 3 8 15 -4.44 4.24
 3 8 16 -2.55 6.71
 3 8 17 1.66 6.11
 3 8 18 -2.01 4.09
 3 -9 -12 4.9 7.4
 -3 9 12 16.35 5.46
 3 -9 -11 -1.68 4.16
 -3 9 11 6.64 7.06
 3 -9 -10 -2.69 4.26
 -3 9 10 6.92 7.28
 -3 9 9 -2.6 4.69
 -3 9 8 0.47 4.47
 -3 9 7 7.26 4.88
 -3 9 6 9.87 5.15
 3 9 -5 5.67 3.39
 -3 9 5 16.09 7.6
 3 9 -4 -0.15 3.13
 -3 9 4 -4.33 6.75
 3 9 -3 -1.37 3.25
 -3 9 3 -5.68 4.68
 3 9 -2 0.93 3.2
 -3 9 2 -2.86 4.52
 3 9 -1 0.37 3.24
 -3 9 1 1.1 4.38
 3 9 0 -1.53 3.38
 -3 9 0 7.2 4.43
 3 9 1 -0.39 3.5
 -3 9 -1 6.94 4.42
 3 9 2 -3.06 3.57
 -3 9 -2 2.36 4.2
 3 9 3 2.85 3.94
 -3 9 -3 9.46 6.77
 3 9 4 5.76 3.83
 -3 9 -4 -4.29 6.83
 3 9 5 -0.67 3.87
 -3 9 -5 7.95 6.71
 3 9 6 7.14 6.92
 -3 9 -6 12.18 4.68
 3 9 7 4.62 6.41
 -3 9 -7 3.19 4.24
 3 9 8 -2.27 6.28
 -3 9 -8 2.71 4.11
 3 9 9 0.46 4.1
 3 9 10 0.08 4.07
 3 9 11 1.66 4.34
 4 0 -27 3.88 2.38
 4 0 -26 15.18 1.73
 4 0 -25 2.34 2.35
 -4 0 25 -0.53 1.19
 4 0 -24 -0.25 2.17
 -4 0 24 1.93 1.16
 4 0 -23 1.26 2.17
 -4 0 23 5.61 1.93
 4 0 -22 6.52 1.95
 4 0 -22 0.61 1.34
 -4 0 22 1.83 1.17
 4 0 -21 1.02 1.27
 4 0 -21 1.08 2.73
 -4 0 21 -1.4 1.62
 4 0 -20 2.9 1.25
 4 0 -20 3.56 1.74
 -4 0 20 4.21 1.04
 4 0 -19 2.2 1.56
 4 0 -19 -2.25 1.09
 -4 0 19 -2.08 0.91
 4 0 -18 0.13 1.52
 4 0 -18 -2.79 1.41
 -4 0 18 3.26 1.32
 4 0 -17 0.36 1.42
 4 0 -17 2.66 1.38
 -4 0 17 0.91 0.79
 4 0 -16 2.59 1.24
 4 0 -16 -1.01 0.83
 -4 0 16 0.26 0.76
 4 0 -15 -1.22 0.77
 4 0 -15 -1.74 1.16
 -4 0 15 -0.63 0.69
 4 0 -14 3.91 1.16
 4 0 -14 4.97 1.74
 -4 0 14 5.39 0.71
 4 0 -13 1.26 0.67
 4 0 -13 1.48 1.01
 -4 0 13 -0.44 0.63
 4 0 -12 5.69 0.97
 4 0 -12 6.18 1.02
 -4 0 12 3.21 0.62
 4 0 -11 0.14 0.56
 4 0 -11 1.14 1.4
 -4 0 11 0.14 0.55
 4 0 -10 0.5 0.5
 4 0 -10 -0.06 0.79
 -4 0 10 0.38 0.89
 -4 0 10 1.21 0.77
 4 0 -9 0.45 0.45
 4 0 -9 -0.33 0.77
 -4 0 9 0.2 0.81
 -4 0 9 -0.31 0.48
 4 0 -8 8.08 0.81
 4 0 -8 7.54 0.47
 -4 0 8 6.94 1.23
 -4 0 8 7.17 0.55
 4 0 -7 2.52 0.63
 4 0 -7 0.14 0.39
 -4 0 7 0.55 0.45
 -4 0 7 1.16 0.7
 4 0 -6 0.44 0.6
 4 0 -6 -0.35 0.6
 -4 0 6 1.06 0.64
 -4 0 6 -0.64 0.6
 4 0 -5 0.21 0.36
 4 0 -5 0.4 0.54
 -4 0 5 0.05 0.4
 -4 0 5 0.17 0.83
 4 0 -4 5.39 0.53
 4 0 -4 5.03 0.43
 -4 0 4 4.07 0.44
 -4 0 4 4.18 0.54
 4 0 -3 0.33 0.39
 4 0 -3 1.23 0.69
 -4 0 3 0.25 0.41
 -4 0 3 1.06 0.47
 4 0 -2 25.38 0.72
 4 0 -2 24.06 0.9
 -4 0 2 25.17 0.72
 -4 0 2 27.6 0.69
 4 0 -1 1.02 0.55
 -4 0 1 0.2 0.44
 -4 0 1 -0.33 0.37
 4 0 0 242.43 4.68
 4 0 0 239.37 3.95
 -4 0 0 238.77 4.11
 -4 0 0 236.36 4.71
 4 0 1 -0.06 0.56
 4 0 1 1.24 0.46
 -4 0 -1 -0.23 0.53
 4 0 2 51.87 0.74
 4 0 2 53.47 1.25
 -4 0 -2 48.6 1.23
 4 0 3 1.31 0.68
 -4 0 -3 1.43 0.93
 4 0 4 2.04 1.11
 -4 0 -4 1.87 0.69
 4 0 5 0.83 0.76
 -4 0 -5 -0.18 0.7
 4 0 6 63.3 1.9
 -4 0 -6 55.04 1.59
 4 0 7 1.79 0.91
 -4 0 -7 -0.06 0.77
 4 0 8 4.14 1.01
 -4 0 -8 2.01 0.88
 4 0 9 -0.15 1.02
 -4 0 -9 2 0.88
 4 0 10 65.52 1.25
 -4 0 -10 54.09 2
 4 0 11 -0.29 0.53
 -4 0 -11 -1.84 1.51
 4 0 12 37.1 1.54
 -4 0 -12 35.27 2.57
 4 0 13 0.72 0.68
 -4 0 -13 1.88 1.75
 4 0 14 7.14 1.33
 -4 0 -14 9.59 1.99
 4 0 15 0.02 0.84
 -4 0 -15 4.89 1.96
 4 0 16 29.21 2.2
 -4 0 -16 38.84 3.09
 4 0 17 -2.75 1.07
 -4 0 -18 21.58 2.04
 -4 0 -19 1.11 1.56
 -4 0 -20 0.37 1.7
 -4 0 -21 -2.48 1.84
 -4 0 -22 42.34 3.21
 -4 0 -23 -3.15 1.99
 -4 0 -24 5.47 3.46
 -4 0 -25 -1.21 3.41
 -4 0 -26 -1.82 2.26
 -4 0 -27 -2.2 2.35
 -4 0 -28 -0.53 2.35
 -4 0 -29 -2.73 2.46
 -4 0 -30 -4.63 3.83
 -4 0 -31 -2 2.55
 4 -1 -30 0.89 2.96
 -4 1 30 -1.58 1.9
 4 -1 -29 -0.03 2.85
 -4 1 29 -0.79 1.85
 4 -1 -28 3.7 2.83
 -4 1 28 0.3 3.28
 4 -1 -27 6.04 3.95
 -4 1 27 -0.16 2.01
 4 -1 -26 2.73 2.5
 -4 1 26 1.21 3.24
 4 1 -25 0.41 0.69
 4 -1 -25 -2.52 2.27
 -4 1 25 -0.26 1.76
 4 1 -24 -0.24 1.08
 4 -1 -24 6.87 3.25
 -4 1 24 1.73 2.55
 4 1 -23 0.71 1.11
 4 -1 -23 2.83 2.04
 -4 1 23 2.14 1.67
 4 1 -22 -1.26 1.16
 4 -1 -22 0.8 1.94
 -4 1 22 9.73 2.31
 4 1 -21 -0.76 0.93
 4 1 -21 2.71 1.09
 4 -1 -21 5.45 2.69
 -4 1 21 -0.62 1.39
 4 1 -20 2.21 1.03
 4 1 -20 3.07 0.57
 4 -1 -20 1.22 1.67
 -4 1 20 5.73 2.09
 4 1 -19 0.22 0.75
 4 1 -19 0.04 0.59
 4 -1 -19 2.19 1.54
 -4 1 19 -1.73 1.31
 4 1 -18 2.6 0.91
 4 1 -18 4.95 0.52
 4 -1 -18 5.91 2.34
 -4 1 18 7.75 2.02
 4 1 -17 23.23 0.95
 4 1 -17 22.84 1.06
 4 -1 -17 20.6 1.82
 -4 1 17 22.98 1.63
 4 1 -16 -0.71 1.38
 4 1 -16 0.21 0.35
 4 -1 -16 -0.48 1.25
 4 1 -16 -1.12 0.67
 -4 -1 16 0.2 0.32
 -4 1 16 1.11 1.1
 4 1 -15 13.28 0.7
 4 1 -15 10.98 1.5
 4 -1 -15 11.02 2.14
 4 -1 -15 14.24 1.48
 -4 -1 15 11.47 0.53
 -4 1 15 12.26 1.91
 4 1 -14 6.96 0.52
 4 -1 -14 7.68 1.84
 4 1 -14 6.72 1.3
 4 -1 -14 6.76 1.24
 -4 -1 14 7.49 0.46
 -4 1 14 6.45 1.1
 4 1 -13 103.23 1.26
 4 1 -13 107.04 3.32
 4 -1 -13 99.22 3.06
 4 -1 -13 105.13 3.13
 -4 -1 13 100.97 1.5
 -4 1 13 108.4 3.01
 4 1 -12 15.72 1.28
 4 -1 -12 16.67 1.2
 4 1 -12 16.05 0.39
 4 -1 -12 16.59 1.23
 -4 -1 12 14.29 0.43
 -4 1 12 17.79 1.17
 4 1 -11 29.64 0.46
 4 -1 -11 27.09 1.46
 4 1 -11 31.38 1.51
 4 -1 -11 30.26 1.41
 -4 1 11 29.71 1.41
 4 1 -10 31.98 1.49
 4 1 -10 36.42 0.48
 4 -1 -10 36.17 1.41
 4 -1 -10 38.63 1.44
 -4 1 10 35.56 1.69
 -4 1 10 33.36 1.99
 -4 -1 10 36.75 0.6
 4 1 -9 111.99 2.82
 4 1 -9 110.06 1.24
 4 -1 -9 108.95 2.77
 4 -1 -9 110.48 2.9
 -4 -1 9 107.8 1.27
 -4 -1 9 107.1 3.78
 -4 1 9 105.69 3.48
 -4 1 9 107.8 3.07
 4 1 -8 0.04 0.27
 4 -1 -8 2.31 1.21
 4 -1 -8 0.68 0.76
 4 1 -8 -0.04 1.13
 -4 -1 8 0.34 0.32
 -4 -1 8 -1.05 1.22
 -4 1 8 2.66 1.12
 -4 1 8 3.35 1.3
 4 1 -7 19.56 0.5
 4 -1 -7 17.45 0.96
 4 1 -7 19.83 1.36
 4 -1 -7 18.31 1
 -4 -1 7 19.54 0.36
 -4 -1 7 18.92 1.4
 -4 1 7 15.14 1.13
 -4 1 7 15.46 1.47
 4 1 -6 1.64 0.97
 4 1 -6 -0.66 0.39
 4 -1 -6 1.5 0.73
 4 -1 -6 -0.4 0.66
 -4 -1 6 0.54 0.38
 -4 1 6 1.19 0.79
 -4 1 6 -0.44 0.68
 -4 -1 6 0.72 0.62
 4 1 -5 1.39 0.54
 4 1 -5 -0.18 0.3
 4 -1 -5 0.46 0.68
 4 -1 -5 1.84 0.93
 -4 -1 5 0.85 0.43
 -4 -1 5 -1.02 0.57
 -4 1 5 -0.07 0.7
 -4 1 5 0.25 0.72
 4 1 -4 21.33 1.06
 4 1 -4 22.03 0.58
 4 -1 -4 23.1 0.92
 4 -1 -4 21.12 1.26
 -4 -1 4 20.86 0.71
 -4 1 4 21.77 0.94
 -4 -1 4 21.88 0.74
 -4 1 4 24.16 1.01
 4 -1 -3 12.1 0.73
 4 1 -3 9.57 0.82
 4 -1 -3 12.67 0.79
 -4 -1 3 13.07 0.57
 -4 -1 3 12.28 0.68
 -4 1 3 14.4 0.78
 4 1 -2 24.9 0.86
 4 1 -2 23.65 0.68
 4 -1 -2 18.62 0.88
 4 -1 -2 20.03 0.87
 -4 -1 2 22.42 0.83
 -4 1 2 20.84 0.87
 -4 -1 2 22.81 0.92
 4 1 -1 174.28 2.73
 4 1 -1 181.63 3.48
 4 -1 -1 183.09 3.64
 -4 -1 1 174.12 3.24
 -4 -1 1 183.79 2.81
 -4 1 1 178.59 3.73
 4 1 0 26.87 0.5
 4 -1 0 30.83 0.93
 -4 -1 0 28.3 0.85
 -4 -1 0 26.35 0.49
 -4 1 0 28.04 0.9
 4 -1 1 40.05 1.09
 -4 -1 -1 33.83 1.05
 -4 -1 -1 37.63 0.98
 -4 -1 -1 34.65 0.47
 -4 1 -1 36.12 1.1
 4 -1 2 53.45 1.3
 -4 -1 -2 47.08 1.21
 -4 -1 -2 48.26 0.6
 -4 -1 -2 49.95 1.38
 -4 1 -2 45.7 1.28
 4 -1 3 40.8 1.27
 -4 -1 -3 40.82 1.17
 -4 -1 -3 43.86 1.43
 -4 -1 -3 41.64 0.39
 -4 1 -3 43.7 1.28
 4 -1 4 16.62 0.87
 -4 -1 -4 11.32 1.05
 -4 -1 -4 14.66 0.97
 -4 1 -4 14.32 0.85
 4 -1 5 17.03 0.96
 -4 -1 -5 20.31 1.05
 -4 -1 -5 19.75 1.17
 -4 1 -5 16.62 0.92
 4 -1 6 4.02 0.81
 -4 -1 -6 3.48 0.98
 -4 -1 -6 0.46 0.89
 -4 1 -6 0.94 1.13
 4 -1 7 2.63 1.33
 -4 -1 -7 6.08 1.04
 -4 -1 -7 4.08 1.53
 -4 1 -7 3.02 0.83
 4 1 8 -0.25 0.24
 4 -1 8 -0.03 0.88
 -4 -1 -8 0.65 1.07
 -4 1 -8 0.07 0.82
 4 -1 9 3.22 1.05
 -4 -1 -9 3.66 1.15
 -4 1 -9 2.01 1.3
 4 1 10 4.02 0.48
 4 -1 10 4.78 1.1
 -4 -1 -10 7.17 1.26
 -4 1 -10 3.77 0.93
 4 1 11 0.45 0.59
 -4 -1 -11 1.78 1.25
 -4 1 -11 1.98 0.95
 4 1 12 -0.17 0.69
 -4 1 -12 1.64 1
 -4 -1 -12 -1.65 1.29
 4 1 13 6.57 0.87
 -4 -1 -13 5.56 1.51
 -4 1 -13 6.43 1.8
 4 1 14 7.45 1.06
 -4 1 -14 8.79 1.9
 -4 -1 -14 9.52 1.72
 4 1 15 4.49 1.11
 -4 -1 -15 1.4 1.69
 -4 1 -15 1.79 1.81
 4 1 16 4.38 1.24
 -4 1 -16 2.76 1.97
 -4 -1 -16 2.39 1.79
 4 1 17 0.65 1.37
 -4 -1 -17 7.05 2.82
 -4 1 -17 3.6 1.34
 4 1 18 2.02 1.48
 -4 -1 -18 -0.3 1.79
 -4 1 -18 3 1.41
 4 1 19 2.11 1.62
 -4 -1 -19 4.09 1.96
 -4 1 -19 5.33 2.28
 -4 -1 -20 21.81 2.76
 -4 1 -20 25.58 3.25
 -4 -1 -21 123.58 6.3
 -4 1 -21 120.66 6.92
 -4 -1 -22 3.44 2.33
 -4 1 -22 5.74 2.82
 -4 -1 -23 10.5 4.11
 -4 1 -23 9.5 3.21
 -4 -1 -24 3.84 2.68
 -4 1 -24 1.64 1.9
 -4 -1 -25 3.17 2.82
 -4 1 -25 2.06 1.99
 -4 -1 -26 -0.94 2.84
 -4 1 -26 -0.4 1.98
 -4 -1 -27 0.75 2.82
 -4 1 -27 3.87 2.05
 -4 -1 -28 0.77 4.39
 -4 1 -28 -1.46 2.05
 -4 -1 -29 -0.97 2.85
 -4 1 -29 5.27 3.16
 -4 -1 -30 2.36 2.89
 -4 -1 -31 1.61 2.87
 -4 -1 -32 1.12 3
 4 -2 -34 0.73 3.31
 4 -2 -33 -3.11 3.37
 4 -2 -32 2.78 3.29
 4 -2 -31 0.8 4.68
 -4 2 31 1.33 2.68
 4 -2 -30 3.29 3
 -4 2 30 0.7 2.65
 4 -2 -29 5.2 2.95
 -4 2 29 0.24 4.02
 4 -2 -28 5.71 4.55
 -4 2 28 7.65 2.63
 4 -2 -27 0.12 2.68
 -4 2 27 1.68 3.48
 4 -2 -26 5.15 2.74
 -4 2 26 5.73 2.4
 4 -2 -25 1.54 2.51
 -4 2 25 3.12 2.26
 4 -2 -24 -0.31 2.2
 -4 2 24 -0.76 2.11
 4 -2 -23 3.67 3.25
 -4 2 23 -0.28 1.98
 4 -2 -22 1.78 1.97
 -4 2 22 0.24 3.1
 4 -2 -21 -1.21 1.82
 -4 2 21 1.85 1.86
 4 -2 -20 5.9 1.91
 -4 2 20 6.82 2.98
 4 -2 -19 3.3 1.74
 -4 2 19 6.58 1.75
 4 -2 -18 6.47 2.54
 -4 2 18 0.71 2.6
 4 -2 -17 5.77 1.55
 -4 2 17 6.37 1.63
 4 -2 -16 1 2.13
 -4 2 16 -4.05 2.29
 4 -2 -15 -0.27 1.33
 -4 2 15 1.28 1.44
 4 -2 -14 15.27 2.47
 -4 2 14 21.65 1.8
 4 -2 -13 6.9 1.39
 -4 2 13 7.79 1.41
 4 -2 -12 46.79 2.13
 -4 2 12 42.95 2.28
 4 -2 -11 0.82 1.11
 -4 2 11 0.52 1.95
 4 -2 -10 9.83 1.23
 -4 2 10 8.07 1.41
 4 -2 -9 7.43 1.16
 -4 -2 9 5.28 0.21
 -4 -2 9 5.81 0.19
 -4 2 9 6.27 1.25
 4 -2 -8 45.06 1.97
 4 -2 -8 40.2 2.47
 -4 -2 8 42.54 0.76
 -4 -2 8 43.34 0.55
 -4 2 8 42.32 1.92
 4 -2 -7 -1.46 0.96
 4 -2 -7 0.99 1.08
 -4 -2 7 1.74 0.48
 -4 -2 7 0.09 0.28
 -4 -2 7 -1.63 0.9
 -4 2 7 5.23 1.05
 4 -2 -6 0.21 0.98
 4 -2 -6 3.92 1.02
 -4 -2 6 -0.31 0.57
 -4 -2 6 -0.18 0.79
 -4 -2 6 0.65 0.55
 -4 2 6 1.34 1
 4 -2 -5 1.75 1.01
 4 -2 -5 1.72 0.99
 -4 -2 5 2.42 0.44
 -4 -2 5 4.5 0.68
 -4 -2 5 3.33 0.77
 -4 2 5 2.85 1.06
 4 2 -4 0.84 0.42
 4 -2 -4 1.89 1.37
 -4 -2 4 1.77 0.47
 -4 2 4 -2.23 1.52
 4 2 -3 55.39 1.11
 4 -2 -3 57.05 1.87
 -4 -2 3 55.57 1.28
 -4 2 3 55.76 1.98
 4 2 -2 1.63 0.53
 4 -2 -2 2.59 0.84
 -4 -2 2 2.33 0.95
 -4 2 2 1.15 0.97
 4 2 -1 12.18 0.98
 4 -2 -1 8.91 0.96
 -4 -2 1 8.8 0.76
 -4 2 1 9.87 1.01
 4 2 0 0.31 0.99
 4 -2 0 1.21 1.25
 -4 -2 0 0.05 0.67
 -4 2 0 0.02 1.33
 4 2 1 36.68 1.25
 4 -2 1 37.16 1.42
 -4 -2 -1 39.93 1.32
 -4 2 -1 38.82 1.49
 4 2 2 17.68 1.04
 4 -2 2 18.7 1.11
 -4 -2 -2 21.91 1.13
 -4 2 -2 15.81 1.1
 4 2 3 11.13 0.98
 4 -2 3 11.22 0.93
 -4 -2 -3 10.65 1.06
 -4 2 -3 9.22 0.98
 4 2 4 0.57 0.89
 4 -2 4 1.4 0.87
 -4 -2 -4 1.56 0.94
 -4 2 -4 -0.85 0.85
 4 2 5 4.25 1.01
 4 -2 5 5.64 0.93
 -4 2 -5 7.69 0.93
 4 -2 6 1.35 0.92
 4 2 6 -0.73 1.02
 -4 -2 -6 1.07 0.4
 -4 2 -6 1.54 0.86
 4 -2 7 2.25 1.53
 4 2 7 7.43 1.67
 -4 -2 -7 4.19 0.39
 -4 2 -7 6.58 0.94
 4 2 8 48.26 2.76
 4 -2 8 54.27 1.99
 -4 -2 -8 53.32 0.89
 -4 2 -8 55.11 1.79
 4 2 9 2.36 1.13
 -4 -2 -9 2.37 0.28
 -4 2 -9 1.27 0.94
 4 2 10 -0.31 1.21
 -4 -2 -10 0.93 0.47
 -4 2 -10 1.27 0.93
 4 2 11 69.71 2.68
 -4 -2 -11 69.63 1.37
 -4 2 -11 76.53 3.28
 4 2 12 3.92 1.39
 -4 -2 -12 4.03 0.62
 -4 2 -12 2.16 1.16
 4 2 13 14.81 1.68
 -4 -2 -13 16.39 0.88
 -4 2 -13 15.91 1.42
 4 2 14 15.75 1.71
 -4 -2 -14 12.84 0.67
 -4 2 -14 15.4 1.47
 4 2 15 0.84 1.56
 -4 -2 -15 1.03 0.57
 -4 2 -15 1.93 1.25
 4 2 16 7.19 1.35
 -4 -2 -16 6.68 2
 -4 2 -16 8.4 2.21
 4 2 17 16.55 1.2
 -4 -2 -17 23.44 2.49
 -4 2 -17 22.44 2.54
 4 2 18 0.06 1.5
 -4 -2 -18 -0.17 2.09
 -4 2 -18 2.39 1.43
 4 2 19 1.78 1.57
 -4 -2 -19 0.17 2.25
 -4 2 -19 3.68 1.55
 -4 -2 -20 7.82 3.8
 -4 2 -20 5.08 1.66
 -4 -2 -21 10.8 4.34
 -4 2 -21 7.73 1.73
 -4 -2 -22 -2.6 2.7
 -4 2 -22 1.26 1.69
 -4 -2 -23 0.38 2.87
 -4 2 -23 1.35 1.77
 -4 -2 -24 0.92 2.96
 -4 2 -24 1.6 1.82
 -4 -2 -25 -1.29 4.77
 -4 2 -25 -0.38 2.73
 -4 -2 -26 2.01 3.11
 -4 2 -26 4.48 2.93
 -4 -2 -27 1.3 3.06
 -4 2 -27 -0.56 2.93
 -4 -2 -28 -2.67 3.26
 -4 -2 -29 6.46 3.58
 -4 -2 -30 -2.94 5.6
 -4 -2 -31 4.62 3.9
 -4 -2 -32 3.63 3.81
 -4 -2 -33 3.17 3.94
 4 -3 -34 10.64 5.84
 4 -3 -33 5.42 3.28
 -4 3 33 -0.32 3.44
 4 -3 -32 1.07 3.07
 -4 3 32 1.15 3.16
 4 -3 -31 2.79 4.98
 -4 3 31 3.76 3.18
 4 -3 -30 1.53 2.97
 -4 3 30 0.54 3.06
 4 -3 -29 4.25 4.46
 -4 3 29 2.31 4.6
 4 -3 -28 0.04 2.79
 -4 3 28 -0.56 2.77
 4 -3 -27 4.47 2.87
 -4 3 27 2.34 2.85
 4 -3 -26 -7.41 4.05
 -4 3 26 8.27 2.89
 4 -3 -25 4.06 2.62
 -4 3 25 4.03 2.74
 4 -3 -24 4.9 3.85
 -4 3 24 -0.52 3.98
 4 -3 -23 3.07 2.31
 -4 3 23 5.71 2.75
 4 -3 -22 1.94 2.22
 -4 3 22 5.53 2.51
 4 -3 -21 3.59 2.16
 -4 3 21 12.07 2.54
 4 -3 -20 5.18 1.99
 -4 3 20 1.73 2.29
 4 -3 -19 10.75 2.18
 -4 3 19 8.5 3.59
 4 -3 -18 2.54 1.81
 -4 3 18 0.02 2.04
 4 -3 -17 -1.52 1.68
 -4 3 17 2.08 2.93
 4 -3 -16 2.68 1.62
 -4 3 16 2.74 1.95
 4 -3 -15 -2.96 1.58
 -4 3 15 -1.05 1.84
 4 -3 -14 6.44 2.38
 -4 3 14 3.9 1.9
 4 -3 -13 3.3 1.47
 -4 3 13 0.69 1.74
 4 -3 -12 3.52 1.51
 -4 3 12 1.44 1.75
 4 -3 -11 19.99 1.83
 -4 -3 11 19.33 0.53
 -4 -3 11 22.49 0.54
 -4 3 11 21.36 2.17
 4 3 -10 13.89 0.41
 4 -3 -10 13.3 1.64
 -4 -3 10 13.42 0.67
 -4 3 10 11.2 1.86
 4 3 -9 12.62 0.7
 4 -3 -9 10.7 2.33
 -4 -3 9 9.83 0.57
 -4 3 9 8.55 1.77
 4 3 -8 20.43 0.96
 4 -3 -8 20.42 1.75
 -4 -3 8 19.25 0.78
 -4 3 8 23.29 1.96
 4 3 -7 4.04 0.54
 4 -3 -7 4.74 1.38
 -4 -3 7 5.76 1
 -4 3 7 3.06 1.52
 4 3 -6 55 1.25
 -4 -3 6 49.68 2.01
 -4 3 6 49.48 2.69
 4 3 -5 130.8 3.33
 -4 -3 5 124.82 3.19
 -4 3 5 124.33 6.18
 4 3 -4 34.44 1.58
 -4 -3 4 26.89 1.27
 -4 3 4 32.17 2
 4 3 -3 11.56 0.9
 -4 -3 3 11.02 1.51
 4 3 -2 13.42 0.98
 -4 -3 2 14.57 1.12
 -4 3 2 18.06 1.57
 4 3 -1 -1.65 0.83
 -4 -3 1 0.68 1
 -4 3 1 -2.72 1.89
 4 3 0 37.9 1.49
 -4 -3 0 39.89 1.75
 -4 3 0 35.53 1.96
 4 3 1 21.15 1.31
 -4 3 -1 19.6 1.58
 4 3 2 6.26 1.65
 -4 3 -2 4.04 1.28
 4 3 3 6.72 1.74
 -4 3 -3 7.69 1.23
 4 3 4 12.4 1.25
 -4 3 -4 9.54 1.3
 4 3 5 12.85 1.31
 -4 3 -5 8.52 1.28
 4 3 6 136.92 4.45
 -4 3 -6 141.41 4.34
 4 3 7 22.91 1.79
 -4 3 -7 26.12 2.32
 4 3 8 15.61 1.75
 -4 -3 -8 14.24 0.76
 -4 3 -8 14.32 1.39
 4 3 9 -0.11 1.46
 -4 -3 -9 2.58 0.56
 -4 3 -9 1.04 1.86
 4 3 10 5.91 2.25
 -4 -3 -10 1.05 0.59
 -4 3 -10 -1.38 1.21
 4 3 11 -0.8 1.59
 -4 3 -11 0.13 1.22
 -4 -3 -11 3.17 0.91
 4 3 12 5.19 1.72
 -4 -3 -12 2.07 0.97
 -4 3 -12 3.38 1.32
 4 3 13 12.12 2.01
 -4 -3 -13 9.96 0.79
 -4 3 -13 16.27 2.4
 4 3 14 -1.06 1.85
 -4 -3 -14 0.92 0.7
 -4 3 -14 2.75 1.39
 4 3 15 14.47 2.22
 -4 -3 -15 11.56 0.88
 -4 3 -15 11.94 1.74
 4 3 16 2.54 2.79
 -4 -3 -16 -0.11 0.71
 -4 3 -16 -0.54 1.49
 4 3 17 5.53 1.95
 -4 3 -17 2.4 2.48
 -4 -3 -17 1.82 0.82
 4 3 18 16.98 2.63
 -4 -3 -18 20.29 1.63
 -4 3 -18 9.71 2.96
 4 3 19 3.86 2.3
 -4 -3 -19 5.76 0.92
 -4 3 -19 6.96 2.64
 4 3 20 12.53 2.55
 -4 -3 -20 8.84 1.03
 -4 3 -20 11.14 1.89
 4 3 21 39.52 3.36
 -4 -3 -21 27.25 1.5
 -4 3 -21 31.33 2.53
 -4 -3 -22 4.26 2.81
 -4 3 -22 -0.82 1.77
 -4 -3 -23 2.42 3.11
 -4 3 -23 3.38 1.81
 -4 -3 -24 4.4 3.27
 -4 3 -24 3.54 1.89
 -4 -3 -25 1.96 3.15
 -4 3 -25 0.8 1.74
 -4 -3 -26 2.03 5.35
 -4 -3 -27 -0.93 3.54
 -4 -3 -28 12.57 4.2
 -4 -3 -29 4.01 3.82
 -4 -3 -30 -15.59 7.39
 -4 -3 -31 8 4.08
 -4 -3 -32 0.66 3.63
 4 -4 -32 -3.06 3.18
 -4 4 32 0.11 3.63
 4 -4 -31 1.67 4.96
 -4 4 31 2.51 3.52
 4 -4 -30 4.05 3.05
 -4 4 30 -1.13 3.44
 4 -4 -29 9.25 4.83
 -4 4 29 2.59 3.5
 4 -4 -28 -0.21 2.96
 -4 4 28 9.03 5
 4 -4 -27 3.01 2.89
 -4 4 27 2.59 3.29
 4 -4 -26 3.62 2.82
 -4 4 26 6.44 3.21
 4 -4 -25 -0.42 2.66
 -4 4 25 5.02 4.58
 4 -4 -24 3.53 2.64
 -4 4 24 3.46 3.3
 4 -4 -23 -1.25 2.45
 -4 4 23 3.83 3
 4 -4 -22 5.46 4.21
 -4 4 22 9.12 5.02
 4 -4 -21 -4.43 2.35
 -4 4 21 -1.43 2.87
 4 -4 -20 15.44 4.35
 -4 4 20 16.35 3.34
 4 -4 -19 -0.2 2.13
 -4 4 19 1.46 2.59
 4 -4 -18 21.14 2.74
 -4 4 18 24.55 3.28
 4 -4 -17 0.78 1.99
 -4 4 17 -0.96 3.81
 4 -4 -16 0.53 2.02
 -4 4 16 5.1 2.43
 4 -4 -15 -1.05 1.86
 -4 4 15 3.61 2.28
 4 -4 -14 0.08 1.84
 -4 -4 14 0.17 0.42
 -4 4 14 4.24 2.22
 4 4 -13 3.84 0.6
 4 -4 -13 5.72 1.94
 -4 -4 13 2.83 0.68
 -4 4 13 2.11 2.28
 4 -4 -12 11.62 2
 -4 4 12 13.43 3.83
 4 4 -11 2.73 0.95
 4 -4 -11 4.47 2.75
 -4 -4 11 2.61 0.7
 -4 4 11 0.11 2.18
 4 4 -10 1.75 0.66
 4 -4 -10 -2.53 1.78
 -4 -4 10 0.18 0.76
 -4 4 10 -0.66 2.06
 4 4 -9 42.11 1.93
 4 -4 -9 46.76 2.97
 -4 -4 9 44.55 1.61
 -4 4 9 47.6 3.5
 4 4 -8 2.46 1.24
 4 -4 -8 4.81 1.85
 -4 -4 8 4.58 1.52
 -4 4 8 2.53 2.14
 4 4 -7 1.08 0.85
 -4 -4 7 0.77 1.55
 -4 4 7 2.24 2.94
 4 4 -6 0.92 0.89
 -4 -4 6 2.4 1.65
 -4 4 6 -0.27 1.89
 4 4 -5 34.77 1.51
 -4 -4 5 27.43 1.79
 -4 4 5 31.76 2.64
 4 4 -4 68.86 2.29
 -4 -4 4 64.13 2.74
 -4 4 4 55.17 3.48
 4 4 -3 35.9 1.72
 -4 4 3 36.25 2.6
 4 4 -2 15.16 1.34
 -4 4 2 13.2 3.02
 4 4 -1 2.79 1.16
 -4 4 1 2.79 1.65
 4 4 0 12.71 1.51
 -4 4 0 19.07 1.99
 4 4 1 5.51 1.98
 -4 4 -1 0.01 1.57
 4 4 2 24.36 2.74
 -4 4 -2 28.24 2.17
 4 4 3 18.3 1.78
 -4 4 -3 18.49 3
 4 4 4 10.53 1.68
 -4 4 -4 12.77 1.77
 4 4 5 4.82 1.64
 -4 4 -5 8.46 1.66
 4 4 6 10.88 1.81
 -4 4 -6 11.79 1.75
 4 4 7 2.04 1.67
 -4 4 -7 0.56 1.58
 4 4 8 0.56 1.7
 -4 4 -8 -1.2 1.58
 4 4 9 3.5 2.81
 -4 -4 -9 0.86 1.52
 -4 4 -9 0.89 1.52
 4 4 10 3.15 1.9
 -4 -4 -10 3.53 0.99
 -4 4 -10 3.41 1.65
 4 4 11 -0.81 1.92
 -4 -4 -11 0.92 0.92
 -4 4 -11 -1.38 1.59
 4 4 12 8.66 2.29
 -4 -4 -12 8.46 1.66
 -4 4 -12 8.47 2.87
 4 4 13 1.92 2.06
 -4 -4 -13 2.73 1.45
 -4 4 -13 0.64 1.72
 4 4 14 21.92 3
 -4 -4 -14 26.17 2.1
 -4 4 -14 25.89 2.46
 4 4 15 3.31 3.62
 -4 -4 -15 2.08 1.03
 -4 4 -15 2.79 1.86
 4 4 16 4.65 2.42
 -4 -4 -16 -0.32 1
 -4 4 -16 2.26 1.86
 4 4 17 -0.16 2.41
 -4 -4 -17 0.9 1.04
 -4 4 -17 1.11 2.95
 4 4 18 1.25 2.6
 -4 -4 -18 2.74 1.57
 -4 4 -18 -0.3 2.93
 4 4 19 0.67 2.64
 -4 -4 -19 1.25 1.53
 -4 4 -19 0.2 1.89
 4 4 20 5.12 4.18
 -4 4 -20 4.76 2.04
 4 4 21 0.59 2.62
 -4 4 -21 0.72 1.89
 4 4 22 -4.62 2.74
 -4 4 -22 0.74 1.91
 4 4 23 -2.97 2.93
 4 4 24 1.06 2.97
 4 4 25 4.52 3.2
 -4 -4 -26 3.17 3.76
 -4 -4 -27 -7.52 4.12
 -4 -4 -28 -0.17 3.8
 -4 -4 -29 3.2 6.4
 -4 -4 -30 3.08 4.27
 -4 5 31 9.67 4.4
 4 -5 -30 3.76 3.27
 -4 5 30 0.54 3.94
 4 -5 -29 3.82 3.06
 -4 5 29 0.94 3.82
 4 -5 -28 0.6 2.89
 -4 5 28 -4.66 3.69
 4 -5 -27 0.6 2.84
 -4 5 27 -3.09 3.57
 4 -5 -26 -1.07 2.91
 -4 5 26 -7.33 3.62
 4 -5 -25 3.58 2.76
 -4 5 25 0.86 3.71
 4 -5 -24 1.82 2.88
 -4 5 24 2.06 3.6
 4 -5 -23 2.95 2.83
 -4 5 23 1.86 3.65
 4 -5 -22 -3.65 4.27
 -4 5 22 4.65 3.42
 4 -5 -21 9.15 2.94
 -4 5 21 6.15 3.67
 4 -5 -20 6.08 4.08
 -4 5 20 -0.42 3.22
 4 -5 -19 5.48 2.62
 -4 5 19 2.47 3.39
 4 -5 -18 -1.34 3.86
 -4 5 18 3.5 3.06
 4 -5 -17 1.9 2.37
 -4 5 17 -1.08 3.01
 4 -5 -16 6.99 2.67
 -4 5 16 3.72 3.26
 4 5 -15 0.35 0.79
 4 -5 -15 2.85 2.4
 -4 5 15 1.26 2.9
 4 5 -14 1.7 1.04
 4 -5 -14 1.13 2.27
 -4 5 14 -1.53 2.81
 4 -5 -13 6.11 2.41
 -4 5 13 3.52 2.89
 4 5 -12 1.83 1.43
 4 -5 -12 -0.49 2.29
 -4 -5 12 1.39 0.98
 -4 5 12 3.47 2.67
 4 5 -11 2.77 1.61
 4 -5 -11 8.61 2.36
 -4 -5 11 0.75 1.68
 -4 5 11 3 2.63
 4 5 -10 1.05 1.05
 4 -5 -10 2.11 2.35
 -4 -5 10 0.27 1.8
 -4 5 10 -1.06 2.68
 4 5 -9 0.69 1.15
 4 -5 -9 -3.2 3.54
 -4 -5 9 3.69 2.02
 -4 5 9 3.79 2.67
 4 5 -8 35.59 1.84
 -4 5 8 34.76 3.74
 4 5 -7 20.55 1.62
 -4 5 7 19.63 3.22
 4 5 -6 2.82 1.35
 -4 5 6 7.55 2.52
 4 5 -5 13.44 2.37
 -4 5 5 7.53 2.83
 4 5 -4 31.85 2.14
 -4 5 4 37.6 3.33
 4 5 -3 2.89 1.47
 -4 5 3 2.66 2.25
 4 5 -2 8.77 1.67
 -4 5 2 10.54 2.48
 4 5 -1 7.09 1.72
 -4 5 1 15.57 2.41
 4 5 0 1.92 1.65
 -4 5 0 2.39 2.12
 -4 5 -1 -0.11 2.17
 4 5 2 -2.34 1.74
 -4 5 -2 5.09 3.18
 4 5 3 1.73 1.76
 -4 5 -3 -1.76 2.05
 4 5 4 2.28 1.9
 -4 5 -4 2.68 2.07
 4 5 5 4.82 3.04
 -4 5 -5 3.33 3.31
 4 5 6 18.5 3.71
 -4 5 -6 19.11 2.5
 4 5 7 4.49 2.09
 -4 5 -7 3.37 2.09
 4 5 8 19.01 2.77
 -4 5 -8 19.68 2.65
 4 5 9 2.75 2.28
 -4 5 -9 3.74 3.29
 4 5 10 4.78 2.34
 -4 -5 -10 1.66 2.24
 -4 5 -10 3.12 2.2
 4 5 11 2.74 2.48
 -4 -5 -11 1.8 2.21
 -4 5 -11 6.75 2.22
 4 5 12 7.34 3.83
 -4 -5 -12 4.44 2.07
 -4 5 -12 2.31 2.24
 4 5 13 3.18 2.65
 -4 -5 -13 5.29 2.11
 -4 5 -13 -0.94 2.22
 4 5 14 -2.41 2.65
 -4 -5 -14 5.21 2.06
 -4 5 -14 -0.42 3.4
 4 5 15 10.7 3.14
 -4 -5 -15 10.34 2.22
 -4 5 -15 13.32 3.94
 4 5 16 2.17 2.85
 -4 -5 -16 1.32 2.02
 -4 5 -16 3.57 2.34
 4 5 17 -0.04 4.44
 -4 5 -17 1.71 2.31
 -4 -5 -17 1.34 2.1
 4 5 18 -6.28 3.09
 -4 5 -18 -0.48 2.47
 4 5 19 2.11 3.11
 -4 5 -19 2.98 2.42
 4 5 20 -2.06 3.19
 -4 5 -20 4.61 2.42
 4 5 21 -1.73 3.33
 4 5 22 5.88 5.5
 4 5 23 3.76 3.25
 4 5 24 -2.04 3.19
 4 5 25 1.28 3.23
 4 5 26 2.83 3.41
 4 5 27 -5.14 3.71
 -4 -5 -28 -5.16 4.37
 4 -6 -28 5.6 4.93
 -4 6 28 -4.26 4.15
 4 -6 -27 0.56 2.98
 -4 6 27 -6.52 4.08
 4 -6 -26 -8.43 4.52
 -4 6 26 6.8 3.85
 4 -6 -25 -3.37 3.02
 -4 6 25 3.84 4
 4 -6 -24 -3.81 4.68
 -4 6 24 -1.1 4.03
 4 -6 -23 3.15 2.96
 -4 6 23 -3.64 3.87
 4 -6 -22 2.06 2.97
 -4 6 22 1.8 5.88
 4 -6 -21 -0.35 2.98
 -4 6 21 -5.93 3.77
 4 -6 -20 4.27 3.01
 -4 6 20 4.65 3.76
 4 -6 -19 9.72 3.32
 -4 6 19 10.59 6.21
 4 -6 -18 0.05 2.84
 -4 6 18 1.48 3.54
 4 -6 -17 1.61 2.97
 -4 6 17 -0.93 3.36
 4 -6 -16 -0.55 2.85
 -4 6 16 -0.32 3.4
 4 -6 -15 4.13 3.05
 -4 6 15 6.88 5.49
 4 -6 -14 0.5 2.86
 -4 6 14 2.66 3.4
 4 -6 -13 6.44 2.95
 4 6 -13 3.14 1.93
 -4 6 13 1.07 3.43
 4 6 -12 2.68 1.39
 4 -6 -12 8.37 2.98
 -4 6 12 -1.38 4.89
 4 6 -11 -1.44 1.49
 4 -6 -11 -1.4 2.95
 -4 6 11 4.79 3.24
 4 6 -10 -2.04 1.61
 4 -6 -10 -2.34 2.97
 -4 6 10 -1.95 3.15
 4 6 -9 4.39 1.73
 -4 6 9 9.02 3.19
 4 6 -8 -3.35 1.74
 -4 6 8 0.72 4.88
 4 6 -7 26.27 3.48
 -4 6 7 21.1 4.13
 4 6 -6 3.28 2.84
 -4 6 6 8.68 3.25
 4 6 -5 5.41 2.84
 -4 6 5 0.92 4.9
 4 6 -4 22.65 3.77
 -4 6 4 24.47 3.83
 4 6 -3 3.61 1.94
 -4 6 3 3.09 3.06
 4 6 -2 -0.4 1.99
 -4 6 2 6.8 2.93
 4 6 -1 6.18 2.17
 -4 6 1 8.46 4.53
 4 6 0 1.32 2.03
 -4 6 0 -0.78 2.74
 4 6 1 7.2 2.26
 -4 6 -1 1.53 2.86
 4 6 2 2.82 2.22
 -4 6 -2 4.58 2.81
 4 6 3 4.35 2.34
 -4 6 -3 2.24 4.18
 4 6 4 -1.82 2.33
 -4 6 -4 -1.55 2.74
 4 6 5 -5.02 2.43
 -4 6 -5 3.57 2.67
 4 6 6 11.05 3.99
 -4 6 -6 -1.29 2.65
 4 6 7 4.33 4.08
 -4 6 -7 4.26 2.82
 4 6 8 3.64 2.7
 -4 6 -8 6.86 4.43
 4 6 9 11.26 3.01
 -4 6 -9 6.67 3
 4 6 10 -0.97 2.76
 -4 6 -10 2.47 2.76
 4 6 11 0.92 2.8
 -4 -6 -11 0.38 1.84
 -4 6 -11 2.47 2.78
 4 6 12 -7.94 2.97
 -4 -6 -12 1.56 1.76
 -4 6 -12 9.01 2.76
 4 6 13 -5.13 4.79
 -4 -6 -13 2.01 2.53
 -4 6 -13 -1.64 2.7
 4 6 14 5.15 3.12
 -4 -6 -14 -3.29 2.46
 -4 6 -14 3.65 4.14
 4 6 15 4.79 3.25
 -4 6 -15 3.4 4.35
 4 6 16 7.84 3.5
 -4 6 -16 5.24 4.56
 4 6 17 7.38 3.56
 -4 6 -17 1.42 2.65
 4 6 18 5.45 3.54
 4 6 19 15.71 6.28
 4 6 20 2.03 3.5
 4 6 21 4.01 3.65
 4 6 22 -0.88 3.68
 4 6 23 4.38 3.93
 4 6 24 0.07 5.33
 4 6 25 6.99 3.85
 4 6 26 5.71 3.98
 4 -7 -24 0.96 3.44
 -4 7 24 12.93 4.74
 4 -7 -23 -3.21 5.25
 -4 7 23 11.39 4.64
 4 -7 -22 1.26 3.14
 -4 7 22 -0.27 4.25
 4 -7 -21 0.12 3.24
 -4 7 21 15.11 6.7
 4 -7 -20 6.48 3.43
 -4 7 20 3.88 4.2
 4 -7 -19 3.52 3.43
 -4 7 19 7.17 4.29
 4 -7 -18 3.74 3.43
 -4 7 18 0 6.33
 4 -7 -17 8.16 3.54
 -4 7 17 3.29 4.39
 4 -7 -16 2.92 3.39
 -4 7 16 6.17 4.08
 4 -7 -15 -1.69 3.41
 -4 7 15 -5.03 3.99
 4 -7 -14 10.87 5.49
 -4 7 14 -3.43 6.21
 4 -7 -13 -0.64 3.53
 -4 7 13 8.62 4.12
 4 -7 -12 8.76 5.83
 -4 7 12 4.41 4.2
 4 -7 -11 -1.27 3.58
 -4 7 11 -0.29 3.77
 4 7 -10 2.28 2
 4 -7 -10 3.21 5.4
 -4 7 10 0.8 5.94
 4 7 -9 5.8 2.21
 -4 7 9 10.28 4.06
 4 7 -8 1.69 2.21
 -4 7 8 8.56 3.84
 4 7 -7 0.2 2.14
 -4 7 7 0.02 3.54
 4 7 -6 -1.24 2.15
 -4 7 6 2.6 3.43
 4 7 -5 -0.21 2.28
 -4 7 5 4.58 5.61
 4 7 -4 5.31 2.49
 -4 7 4 1.07 3.82
 4 7 -3 5.97 2.48
 -4 7 3 -2.04 3.81
 4 7 -2 5.32 2.65
 -4 7 2 4.48 3.87
 4 7 -1 -0.77 2.42
 -4 7 1 1.22 5.43
 4 7 0 1.59 2.6
 -4 7 0 3.1 3.66
 4 7 1 3.67 2.73
 -4 7 -1 3.81 3.66
 4 7 2 7.68 2.94
 -4 7 -2 3.31 3.78
 4 7 3 0.4 2.87
 -4 7 -3 3.99 3.63
 4 7 4 4.3 2.96
 -4 7 -4 1.63 5.46
 4 7 5 -0.21 4.54
 -4 7 -5 2.23 5.11
 4 7 6 1.26 4.56
 -4 7 -6 5.01 3.43
 4 7 7 0.32 3.19
 -4 7 -7 7.16 3.45
 4 7 8 4.61 3.32
 -4 7 -8 6.92 3.52
 4 7 9 6.18 3.36
 -4 7 -9 2.29 3.44
 4 7 10 0.19 3.28
 -4 7 -10 -1.82 3.17
 4 7 11 2.5 3.45
 -4 -7 -11 0.13 2.16
 -4 7 -11 4.53 4.91
 4 7 12 3.33 3.37
 -4 7 -12 -3.21 4.87
 -4 -7 -12 1.9 3.37
 4 7 13 0.22 5.4
 -4 7 -13 -0.62 4.91
 4 7 14 -4.58 3.56
 -4 7 -14 5.02 4.96
 4 7 15 -5.18 3.6
 4 7 16 7.54 3.91
 4 7 17 2.57 3.65
 4 7 18 7.71 4.03
 4 7 19 3.55 6.02
 4 7 20 4.85 4.15
 4 7 21 -0.33 3.94
 4 7 22 6.47 4.29
 4 -8 -20 1.56 3.58
 -4 8 20 0.27 7.2
 4 -8 -19 -2.23 5.64
 -4 8 19 5.9 4.67
 4 -8 -18 -0.57 3.7
 -4 8 18 6.37 4.5
 4 -8 -17 5.74 5.62
 -4 8 17 -2.66 4.39
 4 -8 -16 -0.06 3.61
 -4 8 16 -3.81 6.61
 4 -8 -15 0.49 3.65
 -4 8 15 0.77 4.37
 4 -8 -14 0.62 3.74
 -4 8 14 -5.16 4.39
 4 -8 -13 5.82 3.93
 -4 8 13 2.75 4.37
 4 -8 -12 -9.48 5.94
 -4 8 12 4.83 4.19
 4 -8 -11 1.21 3.82
 -4 8 11 -0.4 6.51
 4 -8 -10 10.09 4.1
 -4 8 10 -2.81 4.43
 -4 8 9 1.93 4.2
 -4 8 8 0.44 4.09
 4 8 -7 3.11 2.75
 -4 8 7 2.96 4.35
 4 8 -6 1.6 2.66
 -4 8 6 6.4 6.47
 4 8 -5 8.06 2.97
 -4 8 5 5.25 4.53
 4 8 -4 4.83 2.85
 -4 8 4 0.65 4.08
 4 8 -3 0.86 2.78
 -4 8 3 -3.71 3.94
 4 8 -2 2.69 2.83
 -4 8 2 1.61 3.99
 4 8 -1 -1.16 2.8
 -4 8 1 5.86 5.97
 4 8 0 5.52 3.23
 -4 8 0 11.29 6.81
 4 8 1 4.26 3.14
 -4 8 -1 0.39 4.17
 4 8 2 6.56 3.33
 -4 8 -2 6.22 4.4
 4 8 3 0.61 4.86
 -4 8 -3 -2.76 4
 4 8 4 -2.18 4.98
 -4 8 -4 -1.97 4.04
 4 8 5 1.81 5.29
 -4 8 -5 2.49 3.93
 4 8 6 -7.2 3.51
 -4 8 -6 5.24 6.22
 4 8 7 -1.58 3.38
 -4 8 -7 1.08 5.96
 4 8 8 -2.43 3.55
 -4 8 -8 -0.43 3.88
 4 8 9 4.8 3.5
 -4 8 -9 -5.53 3.8
 4 8 10 5.49 3.54
 -4 8 -10 -3.61 3.95
 4 8 11 -1.93 3.83
 -4 8 -11 6.28 3.86
 4 8 12 3.44 6.01
 -4 8 -12 0.51 3.76
 4 8 13 9.55 6.75
 4 8 14 1.03 3.94
 4 8 15 3.64 4.15
 4 8 16 2.04 4.11
 4 8 17 5.77 4.49
 4 -9 -12 -3.91 6.64
 -4 9 12 5.7 4.98
 4 -9 -11 -0.44 4.32
 -4 9 11 2.04 4.67
 4 -9 -10 -0.43 4.47
 -4 9 10 6.21 4.9
 -4 9 9 -1.96 4.79
 -4 9 8 3.52 7.38
 -4 9 7 6.43 7.67
 -4 9 6 2.63 4.88
 -4 9 5 -0.31 4.62
 4 9 -4 1.49 4.94
 -4 9 4 2.74 4.65
 4 9 -3 6.57 4.85
 -4 9 3 -1.9 4.62
 4 9 -2 0.07 5.06
 -4 9 2 7.64 7.12
 4 9 -1 2.94 5.17
 -4 9 1 4.5 7.24
 4 9 0 2.59 3.31
 -4 9 0 -0.53 4.42
 4 9 1 -2.78 3.28
 -4 9 -1 1.98 4.49
 4 9 2 -3.41 3.45
 -4 9 -2 3.07 4.35
 4 9 3 7.15 3.67
 -4 9 -3 0.7 4.53
 4 9 4 4.13 3.87
 -4 9 -4 7.47 4.63
 4 9 5 5.36 3.84
 -4 9 -5 0.05 4.43
 4 9 6 4.25 4.09
 -4 9 -6 5.36 4.5
 4 9 7 5.64 4.08
 -4 9 -7 1.44 6.97
 4 9 8 3.55 4.15
 -4 9 -8 4.29 6.7
 4 9 9 1.13 4.15
 4 9 10 -0.84 6.42
 5 0 -27 2.39 1.3
 5 0 -27 -0.85 2.65
 -5 0 27 0.07 1.18
 5 0 -26 14.87 2.98
 -5 0 26 11.21 1.44
 5 0 -25 -0.54 2.44
 -5 0 25 2.66 1.99
 5 0 -24 12.33 2.56
 -5 0 24 9.84 1.43
 5 0 -23 3.92 3.32
 -5 0 23 2.38 1.82
 5 0 -22 0.78 1.16
 5 0 -22 -0.2 1.91
 -5 0 22 0.7 1.74
 5 0 -21 -0.18 1.11
 5 0 -21 3.84 1.85
 -5 0 21 -1.92 1.05
 5 0 -20 0.64 1.04
 5 0 -20 3.66 1.77
 -5 0 20 -2.5 1.56
 5 0 -19 1.49 2.45
 5 0 -19 1.79 1.57
 -5 0 19 0.48 1.44
 5 0 -18 -1.99 1.55
 5 0 -18 2.42 1.43
 -5 0 18 0.54 0.88
 5 0 -17 -0.05 1.4
 5 0 -17 0.27 0.9
 -5 0 17 0.58 0.84
 5 0 -16 0.15 0.88
 5 0 -16 1.73 1.35
 -5 0 16 1.88 0.8
 5 0 -15 3.91 1.24
 5 0 -15 -0.09 1.22
 -5 0 15 0.19 0.76
 5 0 -14 9.2 1.31
 5 0 -14 8.3 0.86
 -5 0 14 7.32 0.81
 5 0 -13 -0.74 1.03
 5 0 -13 3.07 1.14
 -5 0 13 -0.85 0.69
 5 0 -12 44.48 2.7
 5 0 -12 46.54 1.26
 -5 0 12 46.41 1.87
 5 0 -11 -0.25 0.56
 5 0 -11 1.1 0.97
 -5 0 11 -0.43 0.59
 5 0 -10 1.5 0.53
 5 0 -10 1.95 0.91
 -5 0 10 0.64 0.62
 5 0 -9 0.23 0.78
 5 0 -9 0.4 0.83
 -5 0 9 0.48 0.93
 -5 0 9 1.93 0.59
 5 0 -8 49.88 1.38
 5 0 -8 44.94 1.45
 -5 0 8 46.46 1.59
 -5 0 8 45.55 1.16
 5 0 -7 -0.79 0.69
 5 0 -7 2.33 1.07
 -5 0 7 0.58 1.15
 -5 0 7 0.01 0.54
 5 0 -6 35.15 1.14
 5 0 -6 36.87 1.21
 -5 0 6 35.57 0.93
 -5 0 6 40.08 1.19
 5 0 -5 1.74 0.96
 5 0 -5 1.33 0.75
 -5 0 5 -0.92 0.52
 -5 0 5 0.91 0.65
 5 0 -4 145.52 2.99
 5 0 -4 153.56 2.85
 -5 0 4 152.88 3.13
 -5 0 4 151.89 2.81
 5 0 -3 0.62 0.52
 5 0 -3 0.38 0.52
 -5 0 3 -0.17 0.5
 -5 0 3 0.29 0.88
 5 0 -2 10.52 0.67
 5 0 -2 11.12 0.89
 -5 0 2 10.82 0.93
 -5 0 2 9.54 0.67
 5 0 -1 0.96 0.59
 5 0 -1 1.57 0.69
 -5 0 1 0.34 0.46
 -5 0 1 0.06 0.58
 5 0 0 73.34 1.66
 5 0 0 76.73 2.35
 -5 0 0 74.5 1.35
 -5 0 0 74.17 1.7
 5 0 1 -0.39 0.69
 5 0 1 -0.02 0.57
 -5 0 -1 -0.16 0.65
 5 0 2 56.31 1.56
 5 0 2 51.52 0.9
 -5 0 -2 52.64 1.45
 5 0 3 -1.9 1.27
 -5 0 -3 -1.23 0.73
 5 0 4 44.99 1.52
 -5 0 -4 38.48 1.35
 5 0 5 1.03 0.92
 5 0 6 84.36 2.59
 -5 0 -6 83.15 2.34
 -5 0 -7 -0.03 0.9
 -5 0 -8 23.41 1.37
 -5 0 -9 -0.41 1.5
 -5 0 -10 9.63 1.24
 5 0 11 0.14 0.54
 -5 0 -11 1.36 1.11
 5 0 12 52.25 1.77
 -5 0 -12 50.05 2.23
 5 0 13 0.11 1.04
 -5 0 -13 -0.58 1.27
 5 0 14 0.72 0.75
 -5 0 -14 -0.04 1.26
 5 0 15 0.2 1.28
 -5 0 -15 -1.84 1.36
 5 0 16 0.13 0.91
 -5 0 -16 4.27 1.44
 5 0 17 2.49 1.43
 -5 0 -17 -3.18 1.58
 -5 0 -18 1.06 1.65
 -5 0 -19 7.02 2.97
 -5 0 -20 -5.09 3.1
 -5 0 -21 7.68 3.27
 -5 0 -22 0.26 2.13
 -5 0 -23 -4.54 2.31
 -5 0 -24 -1.83 2.32
 -5 0 -25 -2.87 2.45
 -5 0 -26 -4.37 2.57
 -5 0 -27 -1.62 3.87
 -5 0 -28 2.65 3.76
 -5 0 -29 -0.87 2.5
 -5 0 -30 2.81 2.61
 -5 0 -31 1.06 2.63
 5 -1 -32 -4.38 3.46
 5 -1 -31 -2.93 3.22
 5 -1 -30 -0.68 3.05
 5 -1 -29 2.37 3.06
 -5 1 29 3.47 2.04
 5 -1 -28 -4.31 4.36
 -5 1 28 2.03 1.96
 5 -1 -27 2.77 2.87
 -5 1 27 6.43 2.14
 5 -1 -26 5.82 2.72
 -5 1 26 4.49 1.96
 5 -1 -25 -2.27 3.53
 -5 1 25 1.68 1.76
 5 1 -24 3.98 0.66
 5 -1 -24 8.99 2.42
 -5 1 24 5.01 1.8
 5 -1 -23 18.29 2.7
 5 1 -23 15.93 1.2
 -5 1 23 21.5 2.14
 5 1 -22 0.13 1.03
 5 1 -22 0.93 0.57
 5 -1 -22 5.28 2.94
 -5 1 22 -1.68 2.42
 5 1 -21 1.35 0.86
 5 1 -21 1.23 1
 5 -1 -21 2.22 1.89
 -5 1 21 1.07 1.5
 5 1 -20 2.3 0.81
 5 -1 -20 -0.12 1.78
 5 1 -20 0.25 0.59
 -5 1 20 2.45 2.13
 5 1 -19 6.75 0.9
 5 1 -19 4.6 1.82
 5 -1 -19 10.83 2.74
 5 1 -19 5.64 0.51
 -5 -1 19 6.84 0.48
 -5 1 19 9.86 1.47
 5 1 -18 2.07 0.46
 5 -1 -18 -0.4 1.55
 5 1 -18 1.43 1.66
 -5 1 18 -0.57 1.32
 -5 -1 18 2.31 0.58
 5 1 -17 22.32 1.97
 5 -1 -17 22.59 1.94
 5 1 -17 20.57 0.86
 -5 -1 17 20.47 0.84
 -5 1 17 22.18 2.51
 5 1 -16 14.27 0.7
 5 -1 -16 13.08 1.66
 5 1 -16 12.66 1.72
 -5 -1 16 14.67 0.7
 -5 1 16 16.36 1.44
 5 1 -15 0.51 1.34
 5 -1 -15 -0.2 1.31
 5 -1 -15 1.29 1.19
 5 1 -15 0.37 0.46
 -5 -1 15 1.35 0.34
 -5 1 15 0.97 1.07
 5 1 -14 0.1 1.23
 5 1 -14 0.03 0.41
 5 -1 -14 -0.56 1.79
 5 -1 -14 2.81 1.73
 -5 -1 14 0.21 0.48
 -5 1 14 -0.25 1.08
 5 1 -13 89.72 1.45
 5 1 -13 97.26 4.47
 5 -1 -13 91.79 3.04
 5 -1 -13 99.25 3.02
 -5 -1 13 96.12 1.61
 -5 1 13 93.37 3.93
 5 -1 -12 76.48 2.59
 5 1 -12 78.76 2.68
 5 1 -12 79.54 1.18
 5 -1 -12 76.69 3.56
 -5 -1 12 77.67 1.15
 -5 1 12 78.2 3.56
 5 1 -11 34.83 0.7
 5 -1 -11 31.38 1.71
 5 -1 -11 31.82 2.23
 5 1 -11 33.92 1.57
 -5 -1 11 32.13 0.62
 -5 1 11 34.73 2.12
 5 -1 -10 2.49 1.65
 5 1 -10 3.11 0.42
 5 1 -10 4.07 1.02
 5 -1 -10 4.94 0.91
 -5 1 10 7.45 0.96
 -5 -1 10 2.99 0.53
 5 -1 -9 21.7 1.14
 5 1 -9 22.86 0.68
 5 -1 -9 21.31 1.27
 5 1 -9 18.56 1.21
 -5 -1 9 23.5 0.73
 -5 1 9 21.63 1.2
 5 1 -8 3 0.82
 5 -1 -8 1.41 0.91
 5 -1 -8 3.85 0.82
 5 1 -8 1.81 0.5
 -5 -1 8 1.91 0.51
 -5 1 8 0.63 1.01
 -5 1 8 2.59 0.86
 -5 -1 8 1.6 1.3
 5 1 -7 33.24 0.67
 5 -1 -7 33.14 1.38
 5 -1 -7 31.78 1.21
 5 1 -7 33.3 1.26
 -5 -1 7 32.07 0.86
 -5 -1 7 30.93 1.7
 -5 1 7 30.79 1.35
 -5 1 7 33.58 1.5
 5 1 -6 9.46 0.49
 5 1 -6 10.24 0.79
 5 -1 -6 8.38 0.97
 5 -1 -6 12.78 0.86
 -5 -1 6 8.65 0.66
 -5 1 6 10.54 1.03
 -5 1 6 11.42 0.94
 -5 -1 6 9.71 0.79
 5 1 -5 -2.52 0.98
 5 -1 -5 1.09 0.7
 5 -1 -5 -1.32 0.81
 5 1 -5 -0.28 0.66
 -5 1 5 0.56 1.31
 -5 -1 5 1.26 0.42
 -5 -1 5 -0.28 0.59
 -5 1 5 0.32 0.8
 5 1 -4 74.61 1.42
 5 1 -4 68.75 1.94
 5 -1 -4 71.65 2.53
 5 -1 -4 72.7 1.84
 -5 -1 4 70.2 1.49
 -5 -1 4 76.26 1.67
 -5 1 4 76 1.97
 -5 1 4 71.26 2.01
 5 1 -3 4.52 0.79
 5 1 -3 4.95 0.56
 5 -1 -3 6 0.77
 5 -1 -3 4.6 0.73
 -5 -1 3 4.19 0.75
 -5 -1 3 3.86 0.52
 -5 1 3 3.25 0.77
 5 -1 -2 13.47 0.81
 5 1 -2 14.7 0.78
 5 -1 -2 15.04 0.86
 5 1 -2 12.62 0.81
 -5 -1 2 10.67 0.96
 -5 1 2 12.47 0.91
 -5 -1 2 11.85 0.8
 5 -1 -1 1.63 0.71
 5 1 -1 2.38 0.66
 5 -1 -1 -0.56 0.69
 5 1 -1 -1.02 0.59
 -5 1 1 2.12 0.77
 -5 -1 1 0.72 0.57
 -5 -1 1 0.39 0.37
 5 1 0 1.08 1.07
 5 1 0 1.31 0.32
 5 -1 0 3.85 1.12
 -5 -1 0 2.03 1
 -5 1 0 1.16 0.74
 -5 -1 0 2.48 0.34
 5 -1 1 0.28 0.74
 5 1 1 1.44 0.27
 -5 -1 -1 0.77 0.69
 -5 1 -1 0.9 1.11
 -5 -1 -1 0.5 0.29
 5 1 2 20.79 0.47
 5 1 2 19.33 1.11
 5 -1 2 20.21 1.14
 -5 1 -2 18.22 1.01
 -5 -1 -2 20.36 1.04
 -5 -1 -2 19.96 0.51
 5 -1 3 6.05 0.92
 -5 -1 -3 6.55 0.91
 -5 1 -3 6.92 0.9
 -5 -1 -3 8.79 0.86
 -5 -1 -3 7.56 0.3
 5 -1 4 11.28 1.43
 -5 -1 -4 8.47 1.07
 -5 1 -4 11.3 1.45
 -5 -1 -4 11.46 0.95
 5 -1 5 26.29 1.29
 -5 -1 -5 27.56 1.34
 -5 -1 -5 28.35 1.42
 -5 1 -5 26.45 1.21
 5 -1 6 53.47 1.9
 -5 1 -6 50.42 1.67
 -5 -1 -6 46.72 1.87
 -5 1 -7 25.35 1.34
 -5 -1 -7 26.83 1.52
 -5 -1 -8 1.45 1.07
 -5 1 -8 1.14 0.98
 5 1 9 32.06 0.41
 -5 -1 -9 30.67 1.78
 -5 1 -9 34.39 1.59
 5 1 10 13.35 0.43
 -5 -1 -10 11.19 1.49
 -5 1 -10 14.06 1.88
 -5 1 -11 9.62 1.23
 -5 -1 -11 11.43 1.47
 5 1 12 7.8 0.66
 -5 -1 -12 4.93 1.52
 -5 1 -12 8.66 1.3
 5 1 13 11.94 0.82
 -5 -1 -13 13.47 1.66
 -5 1 -13 9.12 1.43
 5 1 14 2.2 0.83
 -5 -1 -14 5.31 1.59
 -5 1 -14 -0.65 1.31
 5 1 15 7.13 1.04
 -5 -1 -15 4.68 1.77
 -5 1 -15 5.24 1.42
 5 1 16 0.94 1.09
 -5 -1 -16 -0.74 1.77
 -5 1 -16 2.46 1.4
 5 1 17 20.01 1.61
 -5 1 -17 19.44 1.94
 -5 -1 -17 21.23 2.39
 5 1 18 2.31 0.88
 -5 -1 -18 2.02 2
 -5 1 -18 1.25 1.6
 5 1 19 35.25 1.61
 -5 -1 -19 41.46 4.88
 -5 1 -19 44.9 2.64
 -5 -1 -20 1.79 3.4
 -5 1 -20 1.17 1.74
 -5 -1 -21 2.9 2.42
 -5 1 -21 0.83 1.86
 -5 1 -22 1.04 1.94
 -5 -1 -22 0.73 2.5
 -5 1 -23 8.83 2.22
 -5 -1 -23 2.08 2.93
 -5 -1 -24 9.27 3
 -5 1 -24 5.49 2.24
 -5 -1 -25 9.36 2.99
 -5 1 -25 2.13 2.24
 -5 1 -26 -0.33 2.11
 -5 -1 -26 1.56 4.16
 -5 1 -27 -0.73 2.14
 -5 -1 -27 0.4 2.77
 -5 1 -28 1.62 3.47
 -5 -1 -28 1.85 2.91
 -5 -1 -29 0.92 2.97
 -5 1 -29 1.71 3.68
 -5 -1 -30 2.26 3.01
 -5 -1 -31 1.07 4.7
 -5 -1 -32 1.84 3.23
 -5 -1 -33 5.33 3.36
 5 -2 -35 1.48 3.65
 5 -2 -34 -0.97 3.52
 5 -2 -33 0.85 3.41
 5 -2 -32 2.54 5.07
 5 -2 -31 -0.2 3.12
 -5 2 31 -3.46 4.13
 5 -2 -30 6.89 3.22
 -5 2 30 1.51 2.69
 5 -2 -29 5.73 4.45
 -5 2 29 -2.21 2.41
 5 -2 -28 3.71 3.04
 -5 2 28 2.21 2.48
 5 -2 -27 6.63 3
 -5 2 27 7.88 2.63
 5 -2 -26 1.94 4.06
 -5 2 26 2.24 3.65
 5 -2 -25 -0.34 2.51
 -5 2 25 3.24 2.31
 5 -2 -24 4.37 2.55
 -5 2 24 5.78 3.68
 5 -2 -23 1.56 2.19
 -5 2 23 1.63 2.17
 5 -2 -22 5.34 2.31
 -5 2 22 9.01 3.3
 5 -2 -21 1.45 2.95
 -5 2 21 1.95 1.94
 5 -2 -20 8.35 1.99
 -5 2 20 0.15 3.03
 5 -2 -19 2.85 1.83
 -5 2 19 3.57 1.76
 5 -2 -18 6.93 1.8
 -5 2 18 6.52 2.78
 5 -2 -17 2.11 1.55
 -5 2 17 -0.32 1.57
 5 -2 -16 5.35 1.58
 -5 2 16 0.03 1.59
 5 -2 -15 1.34 1.44
 -5 2 15 1.28 1.47
 5 -2 -14 31.14 1.96
 -5 2 14 25.43 2.13
 5 -2 -13 6.59 1.45
 -5 2 13 6.52 2.38
 5 -2 -12 8.01 1.33
 -5 2 12 3.54 1.49
 5 -2 -11 1.26 1.88
 -5 2 11 3.82 1.37
 5 -2 -10 0.29 1.13
 -5 -2 10 -0.53 0.27
 -5 -2 10 -0.23 0.23
 -5 2 10 0 1.93
 5 -2 -9 6.72 1.28
 -5 -2 9 6.33 0.32
 -5 -2 9 7.53 0.42
 -5 2 9 7.07 1.35
 5 -2 -8 -0.16 1.13
 -5 -2 8 1.02 0.52
 -5 -2 8 0.15 0.45
 -5 2 8 2.12 1.2
 5 -2 -7 60 2.19
 -5 -2 7 60.34 1.01
 -5 -2 7 55.87 1.08
 -5 2 7 55.17 3.33
 5 -2 -6 2.63 1.09
 -5 -2 6 2.59 0.47
 -5 -2 6 5.16 0.73
 -5 2 6 1.02 1.14
 -5 -2 6 5.18 0.88
 5 -2 -5 9.09 1.77
 5 -2 -5 10.64 1.81
 -5 -2 5 12.54 0.89
 -5 -2 5 9.95 0.62
 -5 2 5 8.83 1.22
 -5 -2 5 10.87 0.61
 5 -2 -4 12.01 1.25
 5 -2 -4 14.5 1.31
 -5 -2 4 17.63 0.76
 -5 -2 4 17.64 0.92
 -5 2 4 15.98 1.3
 5 -2 -3 4.29 0.99
 -5 -2 3 2.07 0.65
 -5 -2 3 4.09 0.67
 -5 -2 3 4.54 0.69
 -5 2 3 6.09 1.72
 5 -2 -2 6.58 0.99
 -5 -2 2 3.99 0.9
 -5 -2 2 2.47 0.7
 -5 -2 2 4.75 1.08
 -5 2 2 1.32 1.07
 5 -2 -1 4.18 1.05
 -5 -2 1 3.93 0.77
 -5 -2 1 4.35 0.78
 -5 -2 1 3.34 0.82
 -5 2 1 1.9 1.04
 5 -2 0 47 1.69
 -5 -2 0 48.21 1.51
 -5 -2 0 46.41 1.02
 -5 -2 0 47.33 1.53
 -5 2 0 51.28 2.52
 5 -2 1 -0.73 1.49
 -5 -2 -1 1.57 0.9
 -5 -2 -1 2.93 0.88
 -5 -2 -1 2.28 0.42
 -5 2 -1 2.39 0.96
 5 -2 2 14.41 1.11
 -5 -2 -2 14.69 1.14
 -5 -2 -2 11.52 1.14
 -5 -2 -2 13.95 0.47
 -5 2 -2 13.16 1.15
 5 -2 3 3.73 0.99
 -5 -2 -3 2.12 0.98
 -5 -2 -3 2 0.31
 -5 2 -3 3.23 0.99
 -5 -2 -4 0.26 0.23
 -5 2 -4 -1.27 0.93
 -5 -2 -5 0.48 0.17
 -5 2 -5 -0.47 1.02
 -5 -2 -6 4.37 0.22
 -5 2 -6 6.13 1.03
 -5 2 -7 2.33 1.04
 -5 -2 -8 16.12 1.6
 -5 2 -8 13.93 1.9
 -5 -2 -9 48.79 2.54
 -5 2 -9 48.21 1.99
 -5 -2 -10 6.68 1.69
 -5 2 -10 9.78 1.27
 -5 -2 -11 6.28 1.67
 -5 2 -11 7.07 1.92
 -5 -2 -12 -0.57 1.71
 -5 2 -12 3.94 1.28
 -5 -2 -13 4.42 1.76
 -5 2 -13 -0.58 1.27
 -5 -2 -14 2.56 1.9
 -5 2 -14 5.12 1.42
 -5 -2 -15 8.72 2.15
 -5 2 -15 8.38 1.62
 -5 -2 -16 6.09 3
 -5 2 -16 -0.28 2.29
 -5 -2 -17 6.54 2.43
 -5 2 -17 6.45 2.52
 -5 -2 -18 -0.34 2.24
 -5 2 -18 0.29 2.4
 -5 -2 -19 3.68 2.49
 -5 2 -19 1.04 1.68
 -5 -2 -20 3.57 2.67
 -5 2 -20 1.44 1.81
 -5 -2 -21 -2.58 2.84
 -5 2 -21 7.5 1.93
 -5 -2 -22 1.73 4.21
 -5 2 -22 1.74 1.89
 -5 -2 -23 2.77 2.81
 -5 2 -23 2.89 2.04
 -5 -2 -24 3.73 2.99
 -5 2 -24 3.13 3.09
 -5 -2 -25 1.34 2.97
 -5 2 -25 3.65 3.1
 -5 -2 -26 -0.59 3.02
 -5 2 -26 1.02 3.21
 -5 -2 -27 -4.19 4.95
 -5 2 -27 3 3.32
 -5 -2 -28 5.21 5.51
 -5 -2 -29 3.72 3.68
 -5 -2 -30 -0.88 3.74
 -5 -2 -31 4.2 3.97
 -5 -2 -32 4.16 6.21
 5 -3 -34 1 3.45
 5 -3 -33 2.33 3.51
 -5 3 33 2.17 5.36
 5 -3 -32 -1.41 3.27
 -5 3 32 0.4 3.08
 5 -3 -31 0.13 3.11
 -5 3 31 2.23 3.09
 5 -3 -30 5.08 3.12
 -5 3 30 -1.68 3.1
 5 -3 -29 2.46 3.06
 -5 3 29 2.48 3.02
 5 -3 -28 6.31 3.05
 -5 3 28 0.28 4.76
 5 -3 -27 9.78 4.4
 -5 3 27 -0.57 2.83
 5 -3 -26 3.29 2.69
 -5 3 26 -2.46 2.73
 5 -3 -25 0.53 2.62
 -5 3 25 4.84 2.98
 5 -3 -24 9 2.73
 -5 3 24 4.59 2.95
 5 -3 -23 2.86 2.43
 -5 3 23 5.94 4.16
 5 -3 -22 -1.93 3.33
 -5 3 22 0.83 2.37
 5 -3 -21 -1.31 2.11
 -5 3 21 6.84 3.58
 5 -3 -20 -1.13 3.22
 -5 3 20 7.34 2.41
 5 -3 -19 -0.91 1.95
 -5 3 19 2.79 2.18
 5 -3 -18 -1.98 2.91
 -5 3 18 2.96 2.11
 5 -3 -17 2.91 1.87
 -5 3 17 8.78 2.15
 5 -3 -16 12.9 3.13
 -5 3 16 14.34 2.37
 5 -3 -15 3.74 1.79
 -5 3 15 6.58 2.03
 -5 3 14 0.28 1.88
 5 -3 -13 2.28 1.59
 -5 3 13 3.09 1.9
 5 -3 -12 6.76 2.64
 -5 3 12 9.35 2.02
 5 -3 -11 4.75 1.61
 -5 -3 11 4.54 0.4
 -5 -3 11 2.61 0.45
 -5 3 11 6.22 1.85
 5 -3 -10 1.74 1.43
 -5 -3 10 1.19 0.66
 -5 -3 10 1.53 0.38
 -5 3 10 3.06 1.65
 5 -3 -9 5.31 2.32
 -5 -3 9 5.07 0.9
 -5 -3 9 8.17 0.86
 -5 3 9 7.59 1.78
 5 -3 -8 3.36 1.43
 -5 -3 8 1.82 0.64
 -5 -3 8 1.72 0.56
 -5 3 8 2.38 1.59
 5 -3 -7 29.68 2.15
 -5 -3 7 31.45 1.1
 -5 3 7 30.65 2.32
 5 3 -6 0.69 0.6
 5 -3 -6 2.23 1.47
 -5 -3 6 -0.63 1.14
 -5 3 6 0.34 1.46
 5 3 -5 69.46 1.6
 -5 -3 5 66.33 1.93
 -5 3 5 58.2 4.51
 5 3 -4 1.6 1.17
 -5 -3 4 4.21 0.89
 -5 3 4 0.46 1.32
 5 3 -3 31.97 1.22
 -5 -3 3 30.04 1.47
 -5 3 3 27.65 3.16
 5 3 -2 2.53 0.87
 -5 -3 2 0.75 1.59
 -5 3 2 2.74 1.37
 5 3 -1 23.89 1.26
 -5 -3 1 23.13 1.49
 -5 3 1 22.57 2.74
 5 3 0 0.21 0.96
 5 3 1 2.41 1.01
 -5 3 -1 -0.83 1.92
 5 3 2 0.64 1.04
 -5 3 -2 4.22 1.24
 5 3 3 3.35 1.14
 -5 3 -3 2.3 1.96
 5 3 4 101.99 3.57
 -5 3 -4 107.56 3.7
 5 3 5 15.9 1.6
 -5 3 -5 19.79 2.47
 5 3 6 1.8 1.41
 -5 3 -6 5.25 1.33
 5 3 7 33.49 2.13
 -5 3 -7 35.33 1.95
 5 3 8 11.26 1.62
 -5 -3 -8 8.36 0.57
 -5 3 -8 8.01 2.24
 5 3 9 6.63 1.64
 -5 -3 -9 4.41 0.52
 -5 3 -9 5.96 1.4
 5 3 10 14.07 3.09
 -5 -3 -10 15.91 0.91
 -5 3 -10 17.61 1.68
 5 3 11 0.79 2.46
 -5 -3 -11 2.05 0.69
 -5 3 -11 -2.44 2.14
 5 3 12 -0.4 1.7
 -5 -3 -12 1.07 0.46
 -5 3 -12 0.79 1.49
 5 3 13 10.73 2.03
 -5 -3 -13 10.34 0.81
 -5 3 -13 13.1 1.82
 5 3 14 6.59 1.97
 -5 -3 -14 3.73 0.75
 -5 3 -14 5.87 1.67
 5 3 15 2.19 1.99
 -5 -3 -15 2.45 0.76
 -5 3 -15 3.84 2.52
 5 3 16 2.4 2
 -5 -3 -16 -1.35 0.8
 -5 3 -16 -1.7 2.51
 5 3 17 -3.86 2.1
 -5 -3 -17 0.32 0.56
 -5 3 -17 0.68 1.66
 -5 -3 -18 18.5 3.25
 -5 3 -18 21.67 2.25
 -5 -3 -19 5.54 2.94
 -5 3 -19 6.75 2.03
 -5 -3 -20 5.14 2.94
 -5 3 -20 4.27 1.93
 -5 -3 -21 1.82 3
 -5 3 -21 0.87 1.87
 -5 -3 -22 6.9 3.14
 -5 3 -22 0.79 1.99
 -5 -3 -23 2.21 5.33
 -5 3 -23 4.94 1.97
 -5 -3 -24 6.44 3.86
 -5 3 -24 9.77 2.26
 -5 -3 -25 -9.79 3.49
 -5 3 -25 2.63 1.99
 -5 -3 -26 6.76 3.87
 -5 -3 -27 -9.08 4.05
 -5 -3 -28 -0.67 5.37
 -5 -3 -29 0.63 3.63
 -5 -3 -30 6.14 3.92
 -5 -3 -31 8.39 4.26
 5 -4 -32 4.59 5.14
 -5 4 32 -1.55 5.59
 5 -4 -31 5.66 3.32
 -5 4 31 -0.5 3.73
 5 -4 -30 -1.82 3.27
 -5 4 30 -2.13 3.52
 5 -4 -29 2.57 3.13
 -5 4 29 3.36 5.37
 5 -4 -28 -1.56 3.05
 -5 4 28 -2.3 3.25
 5 -4 -27 2.1 4.44
 -5 4 27 -0.43 3.17
 5 -4 -26 4.25 3.03
 -5 4 26 8.84 3.51
 5 -4 -25 1.16 4.19
 -5 4 25 -4.17 3.36
 5 -4 -24 1.44 2.56
 -5 4 24 -3.21 4.89
 5 -4 -23 4.92 2.76
 -5 4 23 5.3 3.17
 5 -4 -22 8.09 2.76
 -5 4 22 5.37 3.05
 5 -4 -21 0.49 2.56
 -5 4 21 11.54 3.04
 5 -4 -20 2.17 2.39
 -5 4 20 1.01 2.84
 5 -4 -19 7.22 2.45
 -5 4 19 -1.28 4.4
 5 -4 -18 13.94 2.6
 -5 4 18 11.26 3.09
 5 -4 -17 10.29 2.45
 -5 4 17 8.21 2.82
 5 -4 -16 5.13 2.21
 -5 4 16 10.31 4.2
 5 -4 -15 8.51 2.18
 -5 4 15 0.37 2.58
 5 -4 -14 19.87 2.61
 -5 4 14 21.94 4.35
 5 -4 -13 3.48 1.92
 -5 -4 13 0.63 0.59
 -5 -4 13 0.48 0.57
 -5 4 13 -0.27 2.32
 5 -4 -12 7.87 2.01
 -5 -4 12 5.64 0.61
 -5 4 12 1.63 2.38
 5 4 -11 0.12 0.53
 5 -4 -11 2.91 2.79
 -5 -4 11 -2.22 1.04
 -5 4 11 -0.48 2.22
 5 4 -10 19.46 1.22
 5 -4 -10 21.63 2.38
 -5 -4 10 17.16 1.08
 -5 4 10 19.74 2.75
 5 4 -9 0.07 0.73
 5 -4 -9 5.06 2.9
 -5 -4 9 1.96 0.93
 -5 4 9 6.55 3.22
 5 4 -8 14.1 1.5
 5 -4 -8 14.95 2.46
 -5 -4 8 12.35 1.83
 -5 4 8 12.8 2.41
 5 4 -7 12.02 1.03
 -5 -4 7 9.96 1.25
 -5 4 7 13.36 2.27
 5 4 -6 8.71 1
 -5 4 6 7.89 2.15
 -5 -4 6 5.87 1.35
 5 4 -5 1.02 0.95
 -5 4 5 0.22 1.88
 -5 -4 5 0.81 1.91
 5 4 -4 24.79 1.42
 -5 4 4 17.79 3.94
 5 4 -3 6.75 1.15
 -5 4 3 2.01 1.97
 5 4 -2 22.53 1.51
 -5 4 2 19.26 3.6
 5 4 -1 20.27 1.55
 -5 4 1 20.51 2.21
 5 4 0 18.34 1.58
 -5 4 0 20.44 2.21
 5 4 1 10.14 1.52
 -5 4 -1 12.58 2.96
 5 4 2 4.01 1.39
 -5 4 -2 1.55 1.66
 5 4 3 25.57 1.96
 -5 4 -3 24.58 2.18
 5 4 4 7.07 1.63
 -5 4 -4 6.74 1.85
 5 4 5 0.87 1.55
 -5 4 -5 1.03 1.69
 5 4 6 22.7 2.22
 -5 4 -6 23.28 3.41
 5 4 7 2.66 1.65
 -5 4 -7 2.83 1.68
 5 4 8 10.56 1.99
 -5 4 -8 11.73 1.92
 5 4 9 4.77 2.85
 -5 -4 -9 0.64 0.86
 -5 4 -9 0.73 1.73
 5 4 10 1.55 3.02
 -5 -4 -10 0.69 1.3
 -5 4 -10 2.14 2.65
 5 4 11 0.55 2.08
 -5 -4 -11 2.11 0.86
 -5 4 -11 2.64 1.78
 5 4 12 -0.67 2.11
 -5 -4 -12 0.22 1.22
 -5 4 -12 1.07 1.81
 5 4 13 3.95 2.24
 -5 -4 -13 0.85 1.26
 -5 4 -13 -0.55 1.88
 5 4 14 5 2.4
 -5 -4 -14 4.64 0.88
 -5 4 -14 7.21 3.04
 5 4 15 0.22 2.49
 -5 -4 -15 2.35 0.81
 -5 4 -15 6.71 1.96
 5 4 16 7.97 3.51
 -5 -4 -16 -0.16 1.08
 -5 4 -16 0.12 2.02
 5 4 17 3.21 2.51
 -5 -4 -17 0.4 1.1
 -5 4 -17 2.99 2.07
 5 4 18 3.44 2.55
 -5 4 -18 -0.75 2.05
 5 4 19 1.66 2.52
 -5 4 -19 -4.44 2.13
 5 4 20 -2.21 2.62
 -5 4 -20 1.41 2.08
 5 4 21 2.82 2.77
 -5 4 -21 -0.81 2.08
 5 4 22 -0.87 2.82
 -5 4 -22 2.16 3.21
 -5 -4 -23 1.36 3.56
 -5 4 -23 4.34 3.28
 -5 -4 -24 -1.1 3.5
 -5 -4 -25 -0.66 3.58
 -5 -4 -26 10.3 4.12
 -5 -4 -27 1.38 6.12
 -5 -4 -28 -1.7 4.06
 -5 -4 -29 2.92 4.19
 5 -5 -30 1.2 3.27
 -5 5 30 -1.92 5.93
 5 -5 -29 -1.16 3.02
 -5 5 29 3.54 3.72
 5 -5 -28 3.57 3.1
 -5 5 28 -3.05 3.68
 5 -5 -27 -2.49 4.85
 -5 5 27 -8.1 6.29
 5 -5 -26 1.99 2.88
 -5 5 26 -2.29 3.74
 5 -5 -25 -8.9 4.53
 -5 5 25 2.51 3.78
 5 -5 -24 3.63 3.01
 -5 5 24 2.91 5.81
 5 -5 -23 1.88 2.89
 -5 5 23 1.76 3.49
 5 -5 -22 0.16 2.94
 -5 5 22 -4.89 3.48
 5 -5 -21 3.74 2.91
 -5 5 21 8.24 5.53
 5 -5 -20 5.56 2.87
 -5 5 20 3.92 3.56
 5 -5 -19 5.68 2.82
 -5 5 19 4.79 3.38
 5 -5 -18 6.68 2.72
 -5 5 18 -2.11 3.33
 5 -5 -17 -0.4 2.67
 -5 5 17 -6.19 3.09
 5 -5 -16 6.21 2.75
 -5 5 16 1.75 2.98
 5 -5 -15 0.29 2.6
 -5 5 15 7.14 3.01
 5 5 -14 1.02 0.55
 5 -5 -14 4.69 2.49
 -5 5 14 -4.55 2.78
 5 5 -13 -0.93 1.02
 5 -5 -13 3.06 2.37
 -5 5 13 0.46 2.69
 5 5 -12 2.58 0.86
 5 -5 -12 2.24 2.49
 -5 -5 12 -1.82 1.5
 -5 5 12 0.94 2.85
 5 5 -11 6.63 1.6
 5 -5 -11 6.77 2.72
 -5 -5 11 6.03 1.21
 -5 5 11 7.89 3.08
 5 -5 -10 8.17 2.68
 5 5 -10 3.01 1.1
 -5 -5 10 3.2 1.28
 -5 5 10 7.46 2.8
 5 5 -9 6.06 1.65
 5 -5 -9 3.69 2.51
 -5 -5 9 -0.79 1.29
 -5 5 9 -6.43 2.78
 5 5 -8 9.2 2.06
 -5 5 8 6.47 2.9
 5 5 -7 10.87 1.49
 -5 5 7 12.06 2.99
 5 5 -6 27.94 1.9
 -5 5 6 27.71 3.35
 5 5 -5 10.18 1.54
 -5 5 5 9.99 2.66
 5 5 -4 1.28 1.4
 -5 5 4 -0.06 3.68
 5 5 -3 4.36 1.47
 -5 5 3 7.39 2.46
 5 5 -2 -0.19 1.53
 -5 5 2 4.75 2.23
 5 5 -1 -1.57 1.54
 -5 5 1 -0.77 3.49
 5 5 0 4.45 1.71
 -5 5 0 4.29 2.33
 5 5 1 10.53 1.89
 -5 5 -1 6.83 2.56
 5 5 2 7.55 1.92
 -5 5 -2 9.74 2.48
 5 5 3 32.4 2.68
 -5 5 -3 28.63 4.83
 5 5 4 5.98 2.11
 -5 5 -4 11.41 2.37
 5 5 5 -5.62 3.05
 -5 5 -5 1.58 2.13
 5 5 6 -1.53 2.98
 -5 5 -6 2.99 3.21
 5 5 7 0 2.02
 -5 5 -7 0.2 2.11
 5 5 8 -0.17 2.26
 -5 5 -8 5.79 2.2
 5 5 9 -2.13 2.24
 -5 5 -9 -0.24 2.25
 5 5 10 0.67 2.48
 -5 -5 -10 3.4 1.35
 -5 5 -10 10 3.61
 5 5 11 9.42 2.67
 -5 -5 -11 6.73 1.39
 -5 5 -11 6.19 3.81
 5 5 12 8.16 2.55
 -5 -5 -12 -0.87 1.18
 -5 5 -12 4.72 2.37
 5 5 13 4.92 4.27
 -5 -5 -13 5.97 1.28
 -5 5 -13 3.47 2.59
 5 5 14 5.86 2.74
 -5 -5 -14 -0.97 1.72
 -5 5 -14 0.04 2.47
 5 5 15 2.43 2.86
 -5 -5 -15 1.47 1.82
 -5 5 -15 -0.38 2.56
 5 5 16 15.33 3.41
 -5 5 -16 10.15 4.58
 5 5 17 0.78 3.1
 -5 5 -17 5.03 3.92
 5 5 18 22.57 4
 -5 5 -18 19.48 5.04
 5 5 19 4.41 4.57
 -5 5 -19 1.5 2.49
 5 5 20 -1.87 3.12
 -5 5 -20 -1.62 2.45
 5 5 21 2.61 3.1
 5 5 22 1.97 3.21
 5 5 23 0.52 3.19
 5 5 24 4.67 3.38
 -5 -5 -25 5.1 4.09
 -5 -5 -26 4.33 4.2
 -5 -5 -27 4.38 4.33
 5 -6 -28 -2.25 3.29
 -5 6 28 -5.71 4.3
 5 -6 -27 -3.71 3.32
 -5 6 27 -8.07 7.05
 5 -6 -26 -0.42 3.15
 -5 6 26 -0.73 4.19
 5 -6 -25 -1.66 3.27
 -5 6 25 -2.87 4.23
 5 -6 -24 2.31 4.88
 -5 6 24 -0.33 6.18
 5 -6 -23 4.31 3.21
 -5 6 23 1.88 4.04
 5 -6 -22 -1.17 4.8
 -5 6 22 -1.77 3.85
 5 -6 -21 -0.2 3.02
 -5 6 21 9.18 5.88
 5 -6 -20 6.13 5.05
 -5 6 20 6.66 3.99
 5 -6 -19 -1.93 3.01
 -5 6 19 6.22 3.78
 5 -6 -18 2.1 2.94
 -5 6 18 -2.53 3.57
 5 -6 -17 -0.26 3.1
 -5 6 17 7.19 5.56
 5 -6 -16 7.4 3.28
 -5 6 16 1.15 3.79
 5 -6 -15 -2.3 3.03
 -5 6 15 0.27 3.51
 5 -6 -14 8.4 3.25
 -5 6 14 4.56 5.96
 5 -6 -13 3.58 3.24
 -5 6 13 8.08 3.68
 5 6 -12 2.15 1.29
 5 -6 -12 -0.52 3
 -5 6 12 -0.46 3.3
 5 6 -11 0.52 2.19
 5 -6 -11 15.92 4.97
 -5 6 11 8.34 3.48
 5 6 -10 1.48 2.48
 5 -6 -10 11.2 3.38
 -5 6 10 3.22 3.55
 5 6 -9 0.01 1.53
 -5 6 9 2.62 3.28
 5 6 -8 9.56 1.86
 -5 6 8 9.71 3.49
 5 6 -7 0.23 1.64
 -5 6 7 4.77 4.76
 5 6 -6 18.52 2.24
 -5 6 6 12.86 3.9
 5 6 -5 -0.23 1.81
 -5 6 5 3.67 3.04
 5 6 -4 3.45 1.85
 -5 6 4 0.14 3.13
 5 6 -3 4.46 1.99
 -5 6 3 3.27 3.08
 5 6 -2 2.04 2
 -5 6 2 1.72 2.94
 5 6 -1 15.21 2.44
 -5 6 1 17.51 3.48
 5 6 0 6.01 2.23
 -5 6 0 8.29 4.63
 5 6 1 3.32 2.11
 -5 6 -1 -2.26 2.83
 5 6 2 3.3 2.28
 -5 6 -2 1.02 2.93
 5 6 3 2.42 2.33
 -5 6 -3 7.08 2.97
 5 6 4 2.49 2.34
 -5 6 -4 -1.32 2.83
 5 6 5 4.02 2.55
 -5 6 -5 8.87 4.61
 5 6 6 9.42 2.78
 -5 6 -6 8.35 3.14
 5 6 7 5.84 4.22
 -5 6 -7 4.49 2.94
 5 6 8 -0.57 4.09
 -5 6 -8 -3.3 3
 5 6 9 0.96 2.71
 -5 6 -9 6.61 4.57
 5 6 10 4.89 2.95
 -5 6 -10 3.23 4.69
 5 6 11 -5.86 2.86
 -5 -6 -11 -0.86 1.63
 -5 6 -11 0.19 2.95
 5 6 12 7.42 3.04
 -5 -6 -12 0.41 1.5
 -5 6 -12 -4.02 2.84
 5 6 13 6.23 3.28
 -5 6 -13 5.07 3.1
 5 6 14 5.66 3.18
 -5 6 -14 -1.88 2.9
 5 6 15 -0.31 5.43
 -5 6 -15 8.59 3.12
 5 6 16 -2.51 3.26
 -5 6 -16 2.84 2.88
 5 6 17 6.11 3.55
 -5 6 -17 1.77 4.65
 5 6 18 3.13 3.48
 -5 6 -18 -1.02 4.51
 5 6 19 2 3.53
 5 6 20 2.01 3.53
 5 6 21 4.83 5.46
 5 6 22 1.52 3.48
 5 6 23 6.09 3.87
 5 6 24 -2.24 3.77
 5 6 25 -1.78 3.86
 5 -7 -24 4.45 3.71
 -5 7 24 7.22 4.82
 5 -7 -23 4.92 5.78
 -5 7 23 10.15 7.55
 5 -7 -22 -0.25 3.31
 -5 7 22 2.49 4.27
 5 -7 -21 1.18 4.95
 -5 7 21 -0.44 4
 5 -7 -20 0.87 3.47
 -5 7 20 5.11 4.16
 5 -7 -19 1.53 3.43
 -5 7 19 0.16 4.13
 5 -7 -18 1.59 3.51
 -5 7 18 6.46 4.22
 5 -7 -17 5.4 3.88
 -5 7 17 10.54 4.41
 5 -7 -16 2.83 5.5
 -5 7 16 2.98 6.53
 5 -7 -15 1.25 3.48
 -5 7 15 4.26 4.17
 5 -7 -14 -2.97 5.44
 -5 7 14 -2.62 4.11
 5 -7 -13 7.67 3.74
 -5 7 13 3.28 4.13
 5 -7 -12 8.36 3.86
 -5 7 12 6.16 6.56
 5 -7 -11 0.74 3.78
 -5 7 11 -4.04 4.01
 5 7 -10 -0.82 2.94
 5 -7 -10 -0.27 3.68
 -5 7 10 2.45 3.72
 5 7 -9 -3.48 2.08
 -5 7 9 -0.89 3.88
 5 7 -8 6.14 2.26
 -5 7 8 11.12 6.24
 5 7 -7 4.33 2.17
 -5 7 7 -5.49 3.93
 5 7 -6 0.08 2.22
 -5 7 6 3.22 3.84
 5 7 -5 1.06 2.25
 -5 7 5 -3.24 3.68
 5 7 -4 -1.22 2.38
 -5 7 4 0.78 5.79
 5 7 -3 1.05 2.45
 -5 7 3 3.08 3.89
 5 7 -2 0.8 2.5
 -5 7 2 2.85 3.83
 5 7 -1 5.13 2.61
 -5 7 1 2.68 3.84
 5 7 0 1.44 2.58
 -5 7 0 2.52 3.67
 5 7 1 1.47 2.71
 -5 7 -1 10.96 5.79
 5 7 2 10.47 3.08
 -5 7 -2 17.13 4.04
 5 7 3 4.88 3
 -5 7 -3 10.45 3.74
 5 7 4 8.99 3.01
 -5 7 -4 0.79 3.64
 5 7 5 10.32 3.38
 -5 7 -5 12.83 4.02
 5 7 6 1.36 3.02
 -5 7 -6 -1.21 3.36
 5 7 7 0.75 4.93
 -5 7 -7 9.55 5.44
 5 7 8 4.87 4.98
 -5 7 -8 0.94 3.38
 5 7 9 3.49 3.37
 -5 7 -9 4.41 3.5
 5 7 10 8.67 3.38
 -5 7 -10 -2.74 3.55
 5 7 11 4.8 3.43
 -5 7 -11 -0.49 3.37
 5 7 12 8.23 3.58
 -5 7 -12 -2.27 3.42
 5 7 13 0.92 3.34
 -5 7 -13 -0.68 3.34
 5 7 14 10.38 3.57
 -5 7 -14 -3.76 3.47
 5 7 15 2.73 5.62
 -5 7 -15 5.43 5.54
 5 7 16 1.39 5.61
 5 7 17 -1.87 3.68
 5 7 18 -6.88 4.1
 5 7 19 2.17 3.96
 5 7 20 1.23 3.96
 5 7 21 1.41 4.1
 5 -8 -19 -0.18 5.94
 -5 8 19 5.32 4.79
 5 -8 -18 1.32 3.87
 -5 8 18 0.67 6.82
 5 -8 -17 5.75 4.08
 -5 8 17 0.49 4.8
 5 -8 -16 2.17 3.94
 -5 8 16 7.18 4.62
 5 -8 -15 5.88 3.9
 -5 8 15 1.04 4.53
 5 -8 -14 9.75 6.61
 -5 8 14 6.52 7.38
 5 -8 -13 5.26 4.26
 -5 8 13 6.38 4.76
 5 -8 -12 -4.02 6.25
 -5 8 12 -0.48 4.42
 5 -8 -11 1.73 4.04
 -5 8 11 -1.31 4.2
 5 -8 -10 7.81 4.33
 -5 8 10 1.34 4.42
 -5 8 9 2.49 6.84
 -5 8 8 4.28 4.23
 5 8 -7 0 2.64
 -5 8 7 6.78 4.13
 5 8 -6 0.8 2.63
 -5 8 6 0.49 4.13
 5 8 -5 1.85 2.75
 -5 8 5 2.7 4.16
 5 8 -4 -0.66 2.69
 -5 8 4 3.52 6.01
 5 8 -3 2.26 2.84
 -5 8 3 6.08 4.4
 5 8 -2 2.12 2.9
 -5 8 2 2.07 4.32
 5 8 -1 -4.69 2.93
 -5 8 1 2.36 4.2
 5 8 0 3.04 3.02
 -5 8 0 5.78 4.34
 5 8 1 -0.03 3.05
 -5 8 -1 2.99 4.07
 5 8 2 4.1 3.13
 -5 8 -2 -0.35 6.56
 5 8 3 -0.16 3.15
 -5 8 -3 -2.54 4.09
 5 8 4 2.17 3.31
 -5 8 -4 0.43 4.17
 5 8 5 1.96 3.3
 -5 8 -5 -2.07 4.04
 5 8 6 10.42 5.68
 -5 8 -6 3.93 4.5
 5 8 7 3.88 5.09
 -5 8 -7 -0.75 4.03
 5 8 8 5.59 5.25
 -5 8 -8 -1.61 3.95
 5 8 9 2.26 3.53
 -5 8 -9 -5.01 5.97
 5 8 10 2.99 3.72
 -5 8 -10 4.32 6.36
 5 8 11 -3.61 3.85
 -5 8 -11 0.63 6.12
 5 8 12 3.05 3.9
 -5 8 -12 4.99 6.34
 5 8 13 1.04 3.77
 5 8 14 1.94 4
 5 8 15 -1.03 6.22
 5 8 16 -2.95 6.73
 5 -9 -11 2.66 4.71
 -5 9 11 2.64 5.02
 5 -9 -10 7.02 4.88
 -5 9 10 0.99 7.94
 5 -9 -9 10.19 4.91
 -5 9 9 1.16 5.19
 -5 9 8 6.48 5.07
 -5 9 7 3.14 4.95
 -5 9 6 1.18 4.69
 -5 9 5 3.86 7.49
 -5 9 4 5.93 7.73
 5 9 -3 3.45 5.28
 -5 9 3 4.55 4.79
 5 9 -2 -3.37 5.24
 -5 9 2 -1.84 4.74
 5 9 -1 3.54 5.21
 -5 9 1 -0.6 4.6
 5 9 0 3.31 5.34
 -5 9 0 2.18 4.67
 5 9 1 2.68 5.28
 -5 9 -1 0.76 4.47
 5 9 2 1.71 5.5
 -5 9 -2 5.62 7.07
 5 9 3 -0.07 5.66
 -5 9 -3 8.31 7.39
 5 9 4 6.54 5.38
 -5 9 -4 -2.52 4.61
 5 9 5 -0.35 5.53
 -5 9 -5 2.92 4.56
 5 9 6 1.38 3.82
 -5 9 -6 4.38 4.8
 5 9 7 -1.98 3.79
 -5 9 -7 2.99 4.58
 5 9 8 2.36 4.04
 -5 9 -8 3.31 4.75
 6 0 -28 1.5 2.97
 6 0 -27 2 2.78
 6 0 -26 4.73 2.64
 -6 0 26 0.29 1.22
 6 0 -25 1.81 2.51
 -6 0 25 0.09 1.93
 6 0 -24 1.48 3.69
 -6 0 24 2.75 1.23
 6 0 -23 -1.58 2.17
 -6 0 23 0.11 1.26
 6 0 -22 3.21 1.14
 6 0 -22 5.36 2.15
 -6 0 22 1.88 1.89
 6 0 -21 1.31 1.94
 6 0 -21 0.66 1.1
 -6 0 21 0.6 1.73
 6 0 -20 0.68 1.1
 6 0 -20 3 1.82
 -6 0 20 2.78 1.09
 6 0 -19 -0.65 1.74
 6 0 -19 -0.23 1.57
 -6 0 19 -0.3 0.99
 6 0 -18 2.75 1.52
 6 0 -18 1.11 1.66
 -6 0 18 0.57 0.95
 6 0 -17 2.53 2.24
 6 0 -17 -2.05 0.97
 -6 0 17 -1.21 0.93
 6 0 -16 -0.2 1.4
 6 0 -16 3.21 1.47
 -6 0 16 1.47 0.89
 6 0 -15 -0.3 1.36
 6 0 -15 0.49 0.81
 -6 0 15 -0.72 0.85
 6 0 -14 -0.54 0.74
 6 0 -14 1.32 1.22
 -6 0 14 0.98 0.84
 6 0 -13 -0.15 1.18
 6 0 -13 1.29 0.72
 -6 0 13 1.12 1.23
 6 0 -12 10.46 1.33
 6 0 -12 10.05 1.18
 -6 0 12 8.63 1.33
 6 0 -11 1.46 0.64
 6 0 -11 -2.18 1.02
 -6 0 11 -0.28 0.72
 6 0 -10 94.09 2.07
 6 0 -10 101.64 2.95
 -6 0 10 105.8 2.41
 6 0 -9 0.99 0.88
 6 0 -9 -0.94 0.92
 -6 0 9 0.44 1.05
 6 0 -8 37.74 1.06
 6 0 -8 37.38 1.42
 -6 0 8 34.91 1.16
 -6 0 8 38.48 1.55
 6 0 -7 0.58 0.78
 6 0 -7 0.2 0.59
 -6 0 7 -0.59 0.6
 -6 0 7 -0.89 0.85
 6 0 -6 36.38 1.05
 6 0 -6 35.84 1.23
 -6 0 6 36.83 2.07
 -6 0 6 37.24 1.11
 6 0 -5 0.98 0.94
 6 0 -5 1.24 0.71
 -6 0 5 -0.46 0.98
 -6 0 5 0.38 0.75
 6 0 -4 6.68 0.74
 6 0 -4 4.95 0.7
 -6 0 4 5.96 0.79
 -6 0 4 7.82 1.03
 6 0 -3 0.33 0.6
 6 0 -3 -0.92 0.66
 -6 0 3 4.35 0.97
 -6 0 3 -0.17 0.67
 6 0 -2 34.59 1.36
 6 0 -2 33.09 1.64
 -6 0 2 34.37 1.62
 -6 0 2 30.89 1.02
 6 0 -1 0.02 0.7
 6 0 -1 0.96 0.53
 -6 0 1 1.42 0.74
 -6 0 1 1.12 0.57
 6 0 0 4.42 0.85
 6 0 0 3.73 0.53
 -6 0 0 4.92 0.82
 6 0 1 -0.54 0.47
 6 0 1 3.03 1.24
 -6 0 -1 0.61 1.21
 6 0 2 3.12 0.89
 6 0 2 2.13 0.44
 -6 0 -2 -0.05 0.86
 6 0 3 0.18 0.43
 6 0 3 -1.15 1.42
 -6 0 -3 1.95 0.86
 6 0 4 4.35 1.13
 6 0 4 3.85 0.66
 -6 0 -4 0.72 0.92
 -6 0 -5 2.68 0.98
 -6 0 -6 -0.12 0.96
 -6 0 -7 0.58 1.63
 -6 0 -8 48.2 2.03
 -6 0 -9 -0.32 1.18
 -6 0 -10 0.61 1.2
 -6 0 -11 2.41 1.31
 6 0 12 3.48 0.65
 -6 0 -12 5.38 1.41
 6 0 13 2.04 0.64
 -6 0 -13 -0.11 1.42
 6 0 14 0.53 1.08
 -6 0 -14 2.58 1.5
 6 0 15 0.58 0.78
 -6 0 -15 0.55 1.55
 6 0 16 1.92 0.86
 -6 0 -16 2.31 1.66
 6 0 17 3.91 1.43
 -6 0 -17 0.07 1.77
 6 0 18 3.13 0.99
 -6 0 -18 -1.9 1.91
 -6 0 -19 3.79 1.97
 -6 0 -20 78.25 4.46
 -6 0 -21 1.46 2.16
 -6 0 -22 32 3.27
 -6 0 -23 -0.19 2.28
 -6 0 -24 16.11 4.57
 -6 0 -25 -1.64 4.06
 -6 0 -26 8.24 4.24
 -6 0 -27 2.6 2.56
 -6 0 -28 -0.88 2.61
 -6 0 -29 -2.47 2.75
 -6 0 -30 3.31 2.75
 -6 0 -31 2.48 4.34
 6 -1 -33 2.99 3.55
 6 -1 -32 -0.17 3.29
 6 -1 -31 1.3 3.3
 6 -1 -30 3.54 3.27
 6 -1 -29 2.07 3.03
 -6 1 29 1.99 3.14
 6 -1 -28 6.14 2.83
 -6 1 28 0.1 1.98
 6 -1 -27 16 3.27
 -6 1 27 11.65 3.6
 6 -1 -26 5.92 4
 -6 1 26 0.05 1.9
 6 -1 -25 1.61 2.61
 -6 1 25 2.93 1.87
 6 -1 -24 2.3 2.43
 -6 1 24 3.16 1.79
 6 -1 -23 1 3.71
 6 1 -23 6.18 0.88
 -6 1 23 6.18 1.91
 6 -1 -22 2.26 2.07
 6 1 -22 0 0.78
 -6 1 22 -0.13 2.55
 6 1 -21 -1.28 2.01
 6 -1 -21 -0.31 1.96
 6 1 -21 0.83 0.48
 6 1 -21 1.96 0.82
 -6 1 21 1.51 1.58
 -6 -1 21 1.2 0.46
 6 1 -20 2.7 1.97
 6 1 -20 0.83 0.79
 6 -1 -20 7.08 2.82
 -6 -1 20 0.47 0.72
 -6 1 20 2.15 1.49
 6 1 -19 1.59 0.7
 6 1 -19 9.09 1.86
 6 -1 -19 1.25 1.83
 -6 1 19 4.51 2.26
 6 -1 -18 3.55 1.64
 6 1 -18 0.53 0.66
 6 1 -18 5.38 1.69
 -6 1 18 0.35 1.34
 -6 -1 18 1.15 0.46
 6 -1 -17 -2.06 2.36
 6 1 -17 0.95 0.38
 6 1 -17 -0.62 1.64
 -6 1 17 -0.1 1.28
 -6 -1 17 0.22 0.68
 6 -1 -16 6.43 1.46
 6 1 -16 2 0.6
 6 1 -16 3.94 2.36
 -6 1 16 -0.65 2
 -6 -1 16 1.18 0.45
 6 -1 -15 -1.09 1.36
 6 1 -15 -2.01 2.15
 6 1 -15 1 0.55
 -6 1 15 -3.42 1.87
 -6 -1 15 0.09 0.64
 6 -1 -14 2.37 1.19
 6 -1 -14 -0.85 1.33
 6 1 -14 3.74 1.34
 6 1 -14 0.75 0.54
 -6 1 14 2.75 1.23
 -6 -1 14 1.3 0.72
 6 -1 -13 5.64 1.76
 6 -1 -13 1.73 1.26
 6 1 -13 1.07 0.58
 6 1 -13 1.45 1.2
 -6 1 13 2.4 1.13
 -6 -1 13 1.66 0.47
 6 -1 -12 17.26 1.32
 6 -1 -12 12.66 1.47
 6 1 -12 13.1 1.44
 -6 -1 12 13.27 0.89
 -6 1 12 14.09 1.33
 6 1 -11 4.82 0.61
 6 -1 -11 6.41 1.17
 6 -1 -11 4.98 1.08
 6 1 -11 6.33 1.2
 -6 -1 11 2.25 0.77
 -6 1 11 5.72 1.13
 6 1 -10 14.78 1.95
 6 1 -10 16.72 0.8
 6 -1 -10 14.49 1.19
 6 -1 -10 19.62 2.15
 -6 1 10 19.77 1.29
 -6 -1 10 16.6 0.9
 6 1 -9 9.57 0.55
 6 1 -9 10.89 1.61
 6 -1 -9 10.02 1.03
 6 -1 -9 7.85 1.23
 -6 -1 9 9.75 0.55
 -6 1 9 8.99 1.1
 6 1 -8 30.74 1.08
 6 -1 -8 30.29 1.49
 6 -1 -8 28.86 1.28
 6 1 -8 27.98 1.32
 -6 -1 8 25.74 1.02
 -6 1 8 28 2.08
 6 -1 -7 -0.72 0.92
 6 -1 -7 -0.38 1.3
 6 1 -7 -0.29 0.79
 6 1 -7 0.41 0.49
 -6 -1 7 1.87 0.81
 -6 1 7 3.49 1.39
 -6 -1 7 -0.19 0.46
 6 1 -6 25.67 1.11
 6 -1 -6 29.45 1.27
 6 -1 -6 24.65 1.32
 6 1 -6 27.93 1.24
 -6 -1 6 25.18 1.11
 -6 -1 6 24.13 0.76
 -6 1 6 26.91 1.45
 -6 1 6 25.97 1.31
 6 -1 -5 29.03 1.24
 6 -1 -5 31.4 1.91
 6 1 -5 30.72 1.07
 6 1 -5 31.54 0.98
 -6 -1 5 28.78 1.05
 -6 -1 5 31.06 0.92
 -6 1 5 30.85 1.53
 -6 1 5 29.56 1.36
 6 -1 -4 14.49 1.44
 6 -1 -4 16.58 1.03
 6 1 -4 16.98 1.22
 6 1 -4 16.44 0.82
 -6 -1 4 13.46 0.8
 -6 1 4 14.96 1.08
 -6 -1 4 15.88 0.73
 6 1 -3 4.68 0.73
 6 -1 -3 3.81 0.85
 6 -1 -3 3.02 0.82
 6 1 -3 5.91 0.59
 -6 -1 3 6.83 0.94
 -6 -1 3 3.9 0.64
 -6 1 3 4.71 0.89
 6 -1 -2 1.26 0.86
 6 -1 -2 1.79 0.81
 6 1 -2 1.54 0.51
 6 1 -2 2.99 0.72
 -6 -1 2 1.75 0.52
 -6 1 2 2.55 0.88
 6 1 -1 0.13 0.83
 6 1 -1 2.15 0.66
 6 -1 -1 1.44 0.85
 6 -1 -1 3.8 1.16
 -6 1 1 -0.95 1.32
 -6 -1 1 2.41 0.7
 -6 -1 1 0.28 0.47
 6 1 0 3.16 0.61
 6 -1 0 1.43 0.87
 6 -1 0 3.32 1.2
 6 1 0 4.82 0.94
 -6 1 0 4.38 0.85
 -6 -1 0 3.25 0.66
 -6 -1 0 2.24 1.18
 6 1 1 3.05 0.94
 6 -1 1 2.49 0.96
 6 1 1 1.14 0.32
 -6 -1 -1 1.2 0.38
 -6 1 -1 0.54 0.86
 -6 -1 -1 2.55 0.8
 6 1 2 0.22 0.27
 6 -1 2 0.2 0.92
 6 1 2 0.49 0.99
 -6 -1 -2 -0.67 0.47
 -6 1 -2 0.99 0.87
 -6 -1 -2 4.53 0.84
 6 1 3 0.46 0.31
 6 -1 3 1.75 0.98
 6 1 3 0.42 1.05
 -6 1 -3 0.06 0.91
 -6 -1 -3 -1.57 0.96
 -6 -1 -4 2.06 0.99
 -6 1 -4 1.64 1.55
 -6 -1 -5 8.6 1.2
 -6 1 -5 7.23 1.09
 -6 1 -6 55.48 1.99
 -6 -1 -6 55.11 2.25
 -6 1 -7 321.79 11.88
 -6 -1 -7 307.19 9.79
 -6 -1 -8 1.7 1.31
 -6 1 -8 1.05 1.14
 -6 -1 -9 30.86 3.06
 -6 1 -9 38.15 1.88
 -6 1 -10 2.37 1.25
 -6 -1 -10 0.41 2.13
 -6 -1 -11 1.38 2.32
 -6 1 -11 -2.51 1.92
 6 1 12 4.31 0.42
 -6 1 -12 3.25 2.1
 -6 -1 -12 2.21 2.46
 6 1 13 1.72 0.35
 -6 -1 -13 3.19 1.66
 -6 1 -13 2.63 1.38
 6 1 14 1.58 0.44
 -6 1 -14 0.69 1.39
 -6 -1 -14 4.51 1.74
 6 1 15 0.66 0.52
 -6 1 -15 1.53 1.47
 -6 -1 -15 6.13 1.8
 6 1 16 2.3 0.6
 -6 1 -16 1.92 1.62
 -6 -1 -16 0.6 1.91
 6 1 17 1.33 0.67
 -6 -1 -17 2.95 2.08
 -6 1 -17 4.01 1.67
 6 1 18 0.08 0.73
 -6 1 -18 1.31 1.73
 -6 -1 -18 1.04 2.15
 -6 -1 -19 18.29 2.95
 -6 1 -19 16.35 2.27
 -6 -1 -20 6.93 2.57
 -6 1 -20 4.13 2.04
 -6 1 -21 87.22 4.99
 -6 -1 -21 99.46 6.11
 -6 -1 -22 7.37 4.12
 -6 1 -22 2.21 2.16
 -6 -1 -23 4.47 4.13
 -6 1 -23 3.12 2.26
 -6 -1 -24 5.46 2.9
 -6 1 -24 2.74 2.26
 -6 -1 -25 -2.34 2.81
 -6 1 -25 1.13 3.42
 -6 1 -26 2.52 3.68
 -6 -1 -26 3.57 3.01
 -6 1 -27 4.12 3.83
 -6 -1 -27 2.38 2.98
 -6 -1 -28 0.15 4.69
 -6 1 -28 -0.99 2.47
 -6 1 -29 -2.7 2.58
 -6 -1 -29 -1.94 4.92
 -6 -1 -30 1.98 3.14
 -6 -1 -31 -5.41 3.47
 -6 -1 -32 -0.29 3.32
 6 -2 -35 2.8 3.8
 6 -2 -34 0.16 3.55
 6 -2 -33 13.59 6.23
 6 -2 -32 2.12 3.33
 6 -2 -31 3.25 3.34
 6 -2 -30 -3.29 4.96
 -6 2 30 -1.29 3.94
 6 -2 -29 0.53 3.12
 -6 2 29 5.75 2.62
 6 -2 -28 3.02 3.03
 -6 2 28 1.99 3.77
 6 -2 -27 4.01 4.55
 -6 2 27 1.57 2.45
 6 -2 -26 3.89 2.79
 -6 2 26 3.06 3.84
 6 -2 -25 3.65 2.55
 -6 2 25 -0.36 2.51
 6 -2 -24 -2.12 2.39
 -6 2 24 4.14 3.49
 6 -2 -23 -3.95 2.36
 -6 2 23 5.71 2.22
 6 -2 -22 2.37 2.19
 -6 2 22 0.66 3.2
 6 -2 -21 11.47 2.38
 -6 2 21 10.09 2.32
 6 -2 -20 2.95 2.06
 -6 2 20 6.01 3.02
 6 -2 -19 20.56 3.69
 -6 2 19 21.89 2.41
 6 -2 -18 -1.35 1.7
 -6 2 18 -0.46 2.72
 6 -2 -17 10.05 2.63
 -6 2 17 1.69 1.79
 6 -2 -16 6.13 1.69
 -6 2 16 2.13 1.76
 6 -2 -15 6.24 1.66
 -6 2 15 2.17 2.69
 6 -2 -14 1.53 1.49
 -6 2 14 -1.15 1.56
 6 -2 -13 5.21 1.47
 -6 2 13 4.75 1.55
 6 -2 -12 11.04 1.56
 -6 2 12 12.01 1.72
 6 -2 -11 17.71 1.66
 -6 -2 11 16.32 0.56
 -6 2 11 18.95 1.81
 -6 -2 11 19.4 0.59
 6 -2 -10 0.75 1.31
 -6 2 10 -0.11 1.38
 -6 -2 10 1.37 0.32
 -6 -2 10 2.84 0.52
 6 -2 -9 21.54 2.43
 -6 2 9 14.77 1.68
 -6 -2 9 17.74 0.84
 -6 -2 9 19.92 0.77
 6 -2 -8 3.6 1.26
 -6 2 8 2.99 1.33
 -6 -2 8 4.78 0.48
 -6 -2 8 5.28 0.46
 6 -2 -7 -1.55 1.11
 -6 2 7 1.93 1.25
 -6 -2 7 0.8 0.74
 -6 -2 7 0.39 0.48
 6 -2 -6 50.34 2.35
 -6 2 6 62.13 2.55
 -6 -2 6 64.69 1.39
 -6 -2 6 67.27 2.74
 -6 -2 6 61.73 1.76
 6 -2 -5 43.61 1.97
 -6 2 5 40.24 2.04
 -6 -2 5 39.73 1.59
 -6 -2 5 44.24 1.56
 -6 -2 5 39.63 2.07
 6 -2 -4 1.63 1.14
 -6 -2 4 0.01 0.66
 -6 2 4 -0.07 1.14
 -6 -2 4 -0.05 0.97
 -6 -2 4 1.39 1.15
 6 -2 -3 3.96 1.19
 -6 -2 3 1.67 0.7
 -6 -2 3 5.84 0.76
 -6 2 3 5.21 1.19
 -6 -2 3 6.41 1.12
 -6 -2 2 -0.92 0.77
 -6 -2 2 -0.3 0.92
 -6 2 2 3.58 1.11
 -6 -2 2 1 0.76
 -6 -2 1 3.08 1.25
 -6 -2 1 1.45 0.85
 -6 2 1 0.53 1.72
 -6 -2 1 2.2 0.82
 -6 -2 0 6.15 1.03
 -6 -2 0 3.86 0.98
 -6 2 0 4.77 1.13
 -6 -2 0 5.06 0.79
 -6 -2 -1 9.95 1.18
 -6 -2 -1 7.28 0.74
 -6 2 -1 8.71 1.21
 -6 -2 -1 6.4 1.08
 -6 -2 -2 1.9 1.12
 -6 -2 -2 0.6 0.36
 -6 2 -2 3.29 1.09
 -6 -2 -3 20 1.44
 -6 2 -3 16.97 1.37
 -6 -2 -3 14.67 0.57
 -6 -2 -4 0.32 0.33
 -6 2 -4 0.41 1.08
 -6 -2 -4 1.58 1.14
 -6 -2 -5 0.45 0.19
 -6 2 -5 0.35 1.05
 -6 -2 -5 1.01 1.28
 -6 2 -6 8.46 1.3
 -6 -2 -6 8.95 1.56
 -6 2 -7 -1.67 1.78
 -6 -2 -7 3.36 2.15
 -6 2 -8 4.93 1.21
 -6 -2 -8 4.6 1.65
 -6 2 -9 2.1 1.2
 -6 -2 -9 0.35 1.62
 -6 -2 -10 7.31 1.77
 -6 2 -10 5.37 1.36
 -6 -2 -11 2.14 1.8
 -6 2 -11 3.66 2.1
 -6 2 -12 5.82 1.55
 -6 -2 -12 9.08 2.05
 -6 -2 -13 2.29 1.87
 -6 2 -13 -1.86 1.45
 -6 -2 -14 -2.9 1.99
 -6 2 -14 2.73 1.51
 -6 2 -15 7.39 1.83
 -6 -2 -15 10.38 2.39
 -6 2 -16 -0.05 2.76
 -6 -2 -16 6.63 2.31
 -6 -2 -17 4.41 2.55
 -6 2 -17 9.37 2.94
 -6 2 -18 11.29 3.22
 -6 -2 -18 17.21 4.5
 -6 2 -19 8.65 3.33
 -6 -2 -19 16.53 4.19
 -6 2 -20 27.56 3.95
 -6 -2 -20 30.03 3.54
 -6 2 -21 -1.52 3.08
 -6 -2 -21 0.3 2.6
 -6 2 -22 3.3 3.22
 -6 -2 -22 2.7 2.87
 -6 2 -23 0.62 3.18
 -6 -2 -23 0.67 2.9
 -6 2 -24 -1.64 3.25
 -6 -2 -24 2.13 4.66
 -6 -2 -25 9.98 4.95
 -6 2 -25 -0.06 3.62
 -6 2 -26 4.78 3.58
 -6 -2 -26 0.64 3.39
 -6 2 -27 0.63 2.33
 -6 -2 -27 2.31 3.4
 -6 -2 -28 -3.02 3.58
 -6 -2 -29 -3.46 3.76
 -6 -2 -30 5.03 6.2
 -6 -2 -31 0.1 3.73
 6 -3 -34 -1.55 3.63
 6 -3 -33 5.32 5.63
 6 -3 -32 0.28 3.47
 -6 3 32 -2.16 4.84
 6 -3 -31 -1.03 3.35
 -6 3 31 2.09 3.12
 6 -3 -30 1.73 3.1
 -6 3 30 1.55 3.07
 6 -3 -29 4.55 3.07
 -6 3 29 -2.26 3.03
 6 -3 -28 1.45 4.64
 -6 3 28 1.53 2.94
 6 -3 -27 -3.61 2.98
 -6 3 27 2.29 4.6
 6 -3 -26 3.15 2.91
 -6 3 26 1.58 2.97
 6 -3 -25 3.62 4.31
 -6 3 25 6.28 4.6
 6 -3 -24 2.63 2.58
 -6 3 24 1.38 2.77
 6 -3 -23 0.77 2.62
 -6 3 23 8.68 2.78
 6 -3 -22 1.3 2.34
 -6 3 22 0.74 2.58
 6 -3 -21 11.05 2.7
 -6 3 21 20.65 2.94
 6 -3 -20 -1.79 2.18
 -6 3 20 1.77 2.42
 6 -3 -19 17.59 2.61
 -6 3 19 15.99 2.95
 6 -3 -18 9.92 3.57
 -6 3 18 9.28 2.48
 6 -3 -17 0.51 2
 -6 3 17 1.4 2.13
 6 -3 -16 21.98 3.75
 -6 3 16 22.12 2.77
 6 -3 -15 2.84 1.9
 -6 3 15 6.91 2.19
 6 -3 -14 -2.5 2.58
 -6 3 14 -0.42 2.08
 6 -3 -13 14.14 2.03
 -6 3 13 12.86 2.32
 6 -3 -12 2.86 2.57
 -6 -3 12 2.83 0.35
 -6 3 12 4.15 1.92
 -6 -3 12 2.39 0.3
 6 -3 -11 9.74 1.92
 -6 -3 11 10.85 0.52
 -6 -3 11 10.58 0.6
 -6 3 11 15.11 2.11
 6 -3 -10 7.92 2.51
 -6 3 10 2.78 1.83
 6 -3 -9 8.79 1.64
 -6 3 9 4.76 1.94
 -6 -3 9 6.21 0.62
 -6 -3 9 8.57 1.08
 6 -3 -8 80.93 3.67
 -6 -3 8 82.12 2
 -6 3 8 78.86 3.89
 -6 -3 8 81.28 1.8
 6 -3 -7 24.45 2.11
 -6 -3 7 21.48 1.09
 -6 -3 7 22.5 1.04
 -6 3 7 16.77 2.14
 6 -3 -6 58.69 3.06
 -6 -3 6 57.63 2.6
 -6 3 6 53.19 3.05
 -6 -3 6 61.17 2.4
 -6 -3 5 14.49 1.18
 -6 3 5 14.77 1.89
 -6 -3 5 17.01 1.06
 -6 -3 4 38.08 1.62
 -6 3 4 33.89 2.35
 -6 -3 4 32.5 1.41
 -6 -3 3 7.99 1.06
 -6 -3 3 5.81 1.82
 -6 3 3 14.21 1.64
 6 3 -2 -0.4 0.86
 -6 -3 2 -0.47 1.13
 -6 -3 2 1.04 0.85
 -6 3 2 2.44 1.53
 6 3 -1 57.49 1.91
 -6 3 1 54.37 2.81
 6 3 0 47.31 1.78
 -6 3 0 41.85 2.38
 6 3 1 26.4 1.5
 -6 3 -1 29.67 2.08
 6 3 2 41.15 1.86
 -6 3 -2 39.87 2.29
 6 3 3 39.22 1.96
 -6 3 -3 44.54 2.34
 6 3 4 7.67 1.36
 -6 3 -4 9.82 2.3
 6 3 5 1 1.25
 -6 3 -5 0.27 1.34
 6 3 6 7.12 1.45
 -6 3 -6 1.3 1.51
 6 3 7 73.45 3.11
 -6 3 -7 67.99 3.13
 6 3 8 4.77 1.64
 -6 3 -8 7.42 1.58
 6 3 9 -0.55 1.59
 -6 -3 -9 1.38 0.42
 -6 3 -9 1.99 1.48
 6 3 10 1.77 1.67
 -6 -3 -10 0.32 0.29
 -6 3 -10 2.09 2.3
 6 3 11 1.86 1.81
 -6 3 -11 4.65 1.65
 6 3 12 1.08 1.85
 -6 3 -12 8.48 1.74
 -6 3 -13 13.48 2.07
 -6 -3 -13 16.42 2.59
 -6 -3 -14 1.81 2.39
 -6 3 -14 6.29 2.8
 -6 -3 -15 2.66 2.36
 -6 3 -15 1.88 2.73
 -6 -3 -16 10.14 2.72
 -6 3 -16 7.56 1.99
 -6 3 -17 0.76 1.84
 -6 -3 -17 4.04 2.67
 -6 -3 -18 0.19 2.67
 -6 3 -18 -1.79 1.92
 -6 -3 -19 14.71 4.87
 -6 3 -19 10.32 2.32
 -6 -3 -20 1.08 2.9
 -6 3 -20 2.19 2.06
 -6 3 -21 4.6 2.21
 -6 -3 -21 7.2 3.32
 -6 3 -22 -0.84 2.1
 -6 -3 -22 1.75 3.23
 -6 3 -23 2.31 2.16
 -6 -3 -23 -1.73 3.48
 -6 3 -24 3.54 2.24
 -6 -3 -24 0.19 3.61
 -6 3 -25 -0.92 2.14
 -6 -3 -25 4.41 4.91
 -6 -3 -26 6.24 3.61
 -6 -3 -27 -2.19 3.57
 -6 -3 -28 9.64 3.98
 -6 -3 -29 -0.72 3.76
 -6 -3 -30 6.08 6.46
 6 -4 -32 -0.71 3.45
 -6 4 32 2.68 3.68
 6 -4 -31 1.89 3.3
 -6 4 31 -0.36 5.58
 6 -4 -30 -1.5 5.3
 -6 4 30 6.92 3.67
 6 -4 -29 3.61 3.33
 -6 4 29 8.29 3.68
 6 -4 -28 2.59 5.21
 -6 4 28 9.21 5.74
 6 -4 -27 3.41 3.15
 -6 4 27 9.24 3.65
 6 -4 -26 3.49 3.14
 -6 4 26 11.7 3.58
 6 -4 -25 -0.63 2.75
 -6 4 25 0.97 3.18
 6 -4 -24 2.68 2.85
 -6 4 24 5.73 3.32
 6 -4 -23 -2.76 4.13
 -6 4 23 3.77 4.88
 6 -4 -22 1.5 2.74
 -6 4 22 2.16 3.16
 6 -4 -21 7.33 4.51
 -6 4 21 12.65 3.47
 6 -4 -20 7.4 2.69
 -6 4 20 5.25 3.14
 6 -4 -19 19.74 3.13
 -6 4 19 20.5 3.52
 6 -4 -18 1.85 2.4
 -6 4 18 10.66 4.47
 6 -4 -17 0.62 2.35
 -6 4 17 8.23 2.71
 6 -4 -16 8.13 2.35
 -6 4 16 1.6 2.73
 6 -4 -15 -4.61 2.2
 -6 4 15 -1.29 2.64
 6 -4 -14 -1.5 2.17
 -6 4 14 3.94 2.51
 6 -4 -13 1.47 2.05
 -6 4 13 2.3 3.83
 -6 -4 13 0.6 0.61
 -6 -4 13 1.85 0.55
 6 -4 -12 6.95 2.14
 -6 4 12 7.54 2.72
 -6 -4 12 7.22 1.04
 -6 -4 12 7.21 0.9
 6 -4 -11 3.27 2.01
 -6 4 11 3.75 3.63
 -6 -4 11 1.91 1.22
 -6 -4 11 1.38 0.72
 6 -4 -10 5.78 2.05
 -6 4 10 1.5 2.3
 -6 -4 10 0.66 0.77
 -6 -4 10 2.54 0.93
 6 -4 -9 10.05 2.25
 -6 4 9 11.21 2.47
 -6 -4 9 8.21 1.14
 6 -4 -8 2.05 2.09
 6 4 -8 0.88 0.78
 -6 4 8 -2.38 2.12
 -6 -4 8 -0.04 1.11
 6 -4 -7 0.66 2
 6 4 -7 -0.82 0.84
 -6 4 7 1.4 2.02
 -6 -4 7 0.72 1.19
 6 4 -6 32.13 1.48
 -6 4 6 30.24 4.63
 -6 -4 6 29.46 2.82
 6 4 -5 0.87 1.49
 -6 4 5 2.12 2.12
 6 4 -4 8.84 1.21
 -6 4 4 4.5 2.2
 6 4 -3 1.45 1.17
 -6 4 3 0.17 1.85
 6 4 -2 9.26 1.32
 -6 4 2 5.39 2.12
 6 4 -1 2.05 1.25
 -6 4 1 -2.65 2.92
 6 4 0 -0.76 1.31
 -6 4 0 -0.36 1.84
 6 4 1 6.27 1.59
 -6 4 -1 14.08 2.03
 6 4 2 7.75 1.58
 -6 4 -2 5.35 2.03
 6 4 3 7.68 1.64
 -6 4 -3 5.96 1.97
 6 4 4 8.29 1.71
 -6 4 -4 6.74 1.99
 6 4 5 1.18 1.69
 -6 4 -5 3.75 1.85
 6 4 6 2.07 1.77
 -6 4 -6 6.58 1.91
 6 4 7 6.72 1.9
 -6 4 -7 7.03 1.94
 6 4 8 9.26 2.12
 -6 4 -8 15.61 3.09
 6 4 9 5.13 2.05
 -6 4 -9 2 2
 -6 -4 -9 4.46 1.24
 6 4 10 5.94 3.17
 -6 4 -10 -0.24 1.94
 -6 -4 -10 0.63 0.68
 6 4 11 7.8 3.05
 -6 4 -11 2.43 2
 -6 -4 -11 1.98 0.68
 6 4 12 3.13 2.1
 -6 4 -12 3.83 3.03
 -6 -4 -12 1.97 0.94
 6 4 13 10.38 2.45
 -6 4 -13 8.3 2.17
 -6 -4 -13 6.49 0.98
 6 4 14 1.32 2.25
 -6 4 -14 -0.3 2.01
 -6 -4 -14 0.49 0.46
 6 4 15 8.73 2.54
 -6 4 -15 9.46 2.33
 -6 -4 -15 5.02 0.77
 6 4 16 1.13 2.47
 -6 4 -16 0.81 2.2
 6 4 17 -1.15 2.52
 -6 4 -17 2.55 2.24
 6 4 18 2.58 2.85
 -6 4 -18 9.18 3.65
 -6 4 -19 0.17 3.54
 -6 -4 -19 1.55 3.16
 -6 4 -20 9.93 3.79
 -6 -4 -20 3.27 3.61
 -6 4 -21 6.69 3.66
 -6 -4 -21 -0.18 3.51
 -6 4 -22 0.11 2.27
 -6 -4 -22 -2.7 3.5
 -6 4 -23 -1.23 2.22
 -6 -4 -23 4.14 3.45
 -6 -4 -24 8.45 6.26
 -6 -4 -25 10.72 4.08
 -6 -4 -26 -2.19 4
 -6 -4 -27 -0.09 4
 -6 -4 -28 2.8 4.3
 -6 -4 -29 7.22 6.62
 6 -5 -30 1.26 5.06
 -6 5 30 -0.89 3.98
 6 -5 -29 2.27 3.29
 -6 5 29 -0.88 3.79
 6 -5 -28 4.24 3.27
 -6 5 28 0.72 4.12
 6 -5 -27 3.65 3.21
 -6 5 27 4.26 4.03
 6 -5 -26 3.97 3.12
 -6 5 26 -1.12 5.94
 6 -5 -25 7.9 4.98
 -6 5 25 0.26 3.81
 6 -5 -24 4.35 3.12
 -6 5 24 2.79 3.74
 6 -5 -23 2.78 4.71
 -6 5 23 3.37 5.57
 6 -5 -22 1.87 2.95
 -6 5 22 1.96 3.6
 6 -5 -21 11.15 3.25
 -6 5 21 1.97 3.82
 6 -5 -20 13.31 3.4
 -6 5 20 13.6 6.15
 6 -5 -19 11.69 2.95
 -6 5 19 2.07 3.74
 6 -5 -18 4.9 2.93
 -6 5 18 0.66 3.45
 6 -5 -17 -1.01 2.68
 -6 5 17 1.42 4.97
 6 -5 -16 3.44 4.63
 -6 5 16 12.46 3.58
 6 -5 -15 1.43 2.7
 -6 5 15 -4.2 3.05
 6 -5 -14 16.68 4.43
 -6 5 14 6.96 3.43
 -6 -5 14 8.58 1.1
 6 -5 -13 -1.96 2.58
 -6 5 13 2.49 3
 -6 -5 13 1.64 0.81
 6 -5 -12 6.15 4.01
 -6 5 12 1.3 3.13
 6 -5 -11 1.44 2.66
 6 5 -11 2.28 0.9
 -6 5 11 2.78 3.01
 -6 -5 11 0.52 1.75
 6 -5 -10 0.13 3.99
 6 5 -10 -0.63 0.99
 -6 5 10 1.89 2.8
 -6 -5 10 0.63 1.85
 6 -5 -9 4.62 2.73
 6 5 -9 1.64 1.77
 -6 5 9 -2.8 2.86
 6 -5 -8 12.04 4.36
 6 5 -8 7.83 1.36
 -6 5 8 5.91 3.04
 6 5 -7 6.57 1.39
 -6 5 7 7.36 2.83
 6 5 -6 1.83 2.02
 -6 5 6 -3.63 3.88
 6 5 -5 4.35 2.2
 -6 5 5 1.88 2.67
 6 5 -4 -1.34 2.1
 -6 5 4 -2.21 2.46
 6 5 -3 2.45 1.54
 -6 5 3 3.68 3.91
 6 5 -2 4 1.62
 -6 5 2 4.67 2.54
 6 5 -1 3 1.7
 -6 5 1 8.76 2.51
 6 5 0 2.78 1.73
 -6 5 0 6.04 3.61
 6 5 1 3.67 1.85
 -6 5 -1 2.31 2.35
 6 5 2 58.88 3.41
 -6 5 -2 54.81 4.1
 6 5 3 3.51 1.82
 -6 5 -3 -1.72 2.33
 6 5 4 3.21 2.02
 -6 5 -4 2.72 3.64
 6 5 5 2.34 2.96
 -6 5 -5 -0.95 2.28
 6 5 6 6.18 3.54
 -6 5 -6 11.14 2.67
 6 5 7 -1.92 3.37
 -6 5 -7 5.37 2.48
 6 5 8 0.74 2.29
 -6 5 -8 3.53 3.53
 6 5 9 2.87 2.31
 -6 5 -9 -0.42 2.46
 6 5 10 5.56 2.48
 -6 5 -10 3.25 2.53
 -6 -5 -10 -0.07 1.17
 6 5 11 2.78 2.56
 -6 5 -11 2.54 2.49
 -6 -5 -11 0.34 1.67
 6 5 12 6.31 3
 -6 5 -12 13.77 2.93
 -6 -5 -12 7.92 1.16
 6 5 13 3.29 2.84
 -6 5 -13 10.17 4.04
 -6 -5 -13 2.12 1.03
 6 5 14 10.56 4.49
 -6 5 -14 2.22 2.74
 6 5 15 7.44 4.72
 -6 5 -15 9.42 2.93
 6 5 16 14.79 3.17
 -6 5 -16 6.48 2.94
 6 5 17 3.24 2.89
 -6 5 -17 -0.2 2.6
 6 5 18 -0.59 3.05
 -6 5 -18 -1.91 2.66
 6 5 19 -1.1 2.97
 -6 5 -19 0.43 2.59
 6 5 20 5.33 3.11
 -6 5 -20 -0.37 2.65
 6 5 21 -4.04 3.09
 -6 5 -21 2.01 2.62
 -6 -5 -22 2.37 3.8
 -6 -5 -23 -0.39 3.79
 -6 -5 -24 7.86 4.34
 -6 -5 -25 -0.35 4.11
 -6 -5 -26 1.12 4.12
 -6 -5 -27 8.79 7.61
 6 -6 -28 0.15 3.36
 -6 6 28 -3.2 4.46
 6 -6 -27 3.38 5.39
 -6 6 27 7.79 4.68
 6 -6 -26 4.03 3.66
 -6 6 26 9.75 4.6
 6 -6 -25 0.88 3.29
 -6 6 25 -0.39 4.1
 6 -6 -24 -3.84 3.35
 -6 6 24 2.39 3.96
 6 -6 -23 1 3.24
 -6 6 23 1.86 4.02
 6 -6 -22 5.1 4.98
 -6 6 22 -1.47 3.93
 6 -6 -21 -5.16 3.18
 -6 6 21 5.14 3.92
 6 -6 -20 -0.9 4.76
 -6 6 20 -1 3.84
 6 -6 -19 8.43 3.4
 -6 6 19 1.09 6.13
 6 -6 -18 1.26 3.09
 -6 6 18 -0.09 3.75
 6 -6 -17 -1.47 3.3
 -6 6 17 0.9 3.72
 6 -6 -16 0.67 3.25
 -6 6 16 -0.78 5.52
 6 -6 -15 19.23 5.48
 -6 6 15 2.88 3.85
 6 -6 -14 3.16 3.3
 -6 6 14 7.58 3.8
 6 -6 -13 24.81 5.54
 -6 6 13 1.4 3.88
 6 -6 -12 -8.61 3.41
 6 6 -12 -2.74 1.75
 -6 6 12 4.62 3.77
 6 -6 -11 16.6 5.02
 6 6 -11 2.86 1.41
 -6 6 11 -0.19 3.75
 6 -6 -10 9.13 3.53
 6 6 -10 2.37 1.54
 -6 6 10 1.81 3.56
 6 -6 -9 7.66 3.67
 6 6 -9 4.74 2.67
 -6 6 9 11.66 5.75
 6 6 -8 4.39 2.67
 -6 6 8 3.14 3.48
 6 6 -7 6.43 1.79
 -6 6 7 5.28 3.55
 6 6 -6 2.27 1.76
 -6 6 6 -3.71 5.07
 6 6 -5 10.95 2.05
 -6 6 5 8.42 3.41
 6 6 -4 1.22 1.85
 -6 6 4 1.44 3.07
 6 6 -3 0.49 1.97
 -6 6 3 2.47 3.11
 6 6 -2 5.9 2.12
 -6 6 2 -1.29 4.89
 6 6 -1 4.94 2.16
 -6 6 1 0.76 3.07
 6 6 0 9.07 2.36
 -6 6 0 7.87 3.33
 6 6 1 -3.82 2.12
 -6 6 -1 6.01 2.88
 6 6 2 2.12 2.36
 -6 6 -2 3.11 4.54
 6 6 3 3.29 2.37
 -6 6 -3 1.18 3
 6 6 4 4.96 2.54
 -6 6 -4 2.64 3.15
 6 6 5 4.03 2.5
 -6 6 -5 1.69 3
 6 6 6 3.46 2.65
 -6 6 -6 8.63 4.83
 6 6 7 5.49 2.75
 -6 6 -7 -3.77 4.61
 6 6 8 0.02 2.68
 -6 6 -8 -0.83 2.96
 6 6 9 -2.86 4.19
 -6 6 -9 1.72 2.89
 6 6 10 0.86 4.46
 -6 6 -10 1.06 2.97
 6 6 11 4.2 2.98
 -6 6 -11 -3.88 2.99
 6 6 12 9.59 3.3
 -6 6 -12 -0.9 5.06
 6 6 13 1.07 3.18
 -6 6 -13 5.18 4.84
 6 6 14 7.58 3.32
 -6 6 -14 1.24 3.12
 6 6 15 -1.47 3.45
 -6 6 -15 -1.53 3.07
 6 6 16 4.6 3.51
 -6 6 -16 0.76 3.11
 6 6 17 -5.01 5.32
 -6 6 -17 -0.31 3.13
 6 6 18 2.57 3.25
 -6 6 -18 2.75 3.08
 6 6 19 -0.25 3.27
 6 6 20 2.52 3.39
 6 6 21 -1.34 3.44
 6 6 22 2.28 3.67
 6 6 23 -0.96 3.53
 -6 -6 -24 5.39 4.64
 6 -7 -24 -0.01 3.66
 -6 7 24 1.33 4.56
 6 -7 -23 -3.67 5.74
 -6 7 23 -2.17 4.59
 6 -7 -22 2.65 3.56
 -6 7 22 1.03 4.42
 6 -7 -21 -2.44 5.51
 -6 7 21 12.93 6.94
 6 -7 -20 1.58 3.59
 -6 7 20 1.04 4.32
 6 -7 -19 2.49 3.55
 -6 7 19 -0.06 4.25
 6 -7 -18 6.43 3.84
 -6 7 18 -1.51 6.68
 6 -7 -17 -2.91 3.54
 -6 7 17 4.15 4.15
 6 -7 -16 15.89 6.06
 -6 7 16 0.35 4.38
 6 -7 -15 -2.93 3.57
 -6 7 15 7.52 4.08
 6 -7 -14 6.04 3.85
 -6 7 14 7.66 6.98
 6 -7 -13 -2.97 3.84
 -6 7 13 8.54 4.19
 6 -7 -12 1.04 3.77
 -6 7 12 3.05 4.03
 6 -7 -11 9.73 6.02
 -6 7 11 0.11 4.01
 6 -7 -10 4.37 3.93
 -6 7 10 -3.43 6.27
 6 -7 -9 7.58 6.31
 6 7 -9 2.65 3.13
 -6 7 9 2.43 4.22
 6 7 -8 2.89 2.1
 -6 7 8 1.81 4.15
 6 7 -7 2.43 2.15
 -6 7 7 0.35 3.88
 6 7 -6 -1.39 2.18
 -6 7 6 -0.7 6.15
 6 7 -5 1.33 2.21
 -6 7 5 -1.41 3.94
 6 7 -4 2.23 2.3
 -6 7 4 -1.69 3.98
 6 7 -3 0.88 2.4
 -6 7 3 -3.1 3.69
 6 7 -2 -0.07 2.46
 -6 7 2 6.14 5.91
 6 7 -1 1.48 2.5
 -6 7 1 -8.1 3.76
 6 7 0 6.02 2.73
 -6 7 0 -2.55 3.76
 6 7 1 3.03 2.76
 -6 7 -1 3.73 3.74
 6 7 2 -2.61 2.71
 -6 7 -2 -0.68 3.61
 6 7 3 12.36 3.22
 -6 7 -3 5.01 6.31
 6 7 4 4.86 3.08
 -6 7 -4 7.27 5.89
 6 7 5 1.39 3.08
 -6 7 -5 5.4 3.75
 6 7 6 2.76 2.93
 -6 7 -6 -6.88 3.57
 6 7 7 4.85 3.33
 -6 7 -7 10.01 3.82
 6 7 8 -0.26 3.23
 -6 7 -8 -5.03 3.69
 6 7 9 2.27 3.33
 -6 7 -9 3.74 5.65
 6 7 10 0.79 5.13
 -6 7 -10 9.07 5.63
 6 7 11 -0.17 5.6
 -6 7 -11 13.75 5.96
 6 7 12 -5.47 3.39
 -6 7 -12 5.87 3.59
 6 7 13 -6.45 3.41
 -6 7 -13 7.5 3.58
 6 7 14 4.46 3.57
 -6 7 -14 -2.26 3.63
 6 7 15 4.95 3.86
 -6 7 -15 7.09 3.9
 6 7 16 9.79 4.03
 6 7 17 -0.9 3.78
 6 7 18 0.75 6.04
 6 7 19 1.49 3.7
 6 7 20 8.11 4.22
 6 -8 -19 0.98 6.06
 -6 8 19 0.8 4.79
 6 -8 -18 3.3 4.09
 -6 8 18 0.08 4.7
 6 -8 -17 0.83 4.3
 -6 8 17 8.92 4.84
 6 -8 -16 0.1 3.84
 -6 8 16 -0.13 6.86
 6 -8 -15 6.67 4.36
 -6 8 15 12.94 5.24
 6 -8 -14 -0.75 6.25
 -6 8 14 2.74 4.56
 6 -8 -13 0.5 4.15
 -6 8 13 3.45 4.56
 6 -8 -12 2.94 4.1
 -6 8 12 -0.29 4.41
 6 -8 -11 -3.19 6.45
 -6 8 11 1.88 6.78
 6 -8 -10 -0.1 4.42
 -6 8 10 5.41 4.47
 6 -8 -9 1.8 4.65
 -6 8 9 12.55 4.56
 -6 8 8 -0.11 4.21
 -6 8 7 7.96 7.16
 6 8 -6 -0.37 2.61
 -6 8 6 5.9 4.32
 6 8 -5 4.46 2.82
 -6 8 5 1.76 4.54
 6 8 -4 1.57 2.78
 -6 8 4 5.41 4.35
 6 8 -3 1.82 2.82
 -6 8 3 1.09 4.31
 6 8 -2 2.21 2.86
 -6 8 2 -1.37 4.38
 6 8 -1 2.89 3.06
 -6 8 1 9.03 6.84
 6 8 0 0.3 2.84
 -6 8 0 -0.77 4.15
 6 8 1 6.04 3.14
 -6 8 -1 -2.07 4.44
 6 8 2 2.62 3.19
 -6 8 -2 4.35 4.39
 6 8 3 0.73 3.09
 -6 8 -3 -1.15 4.13
 6 8 4 2.74 3.2
 -6 8 -4 0.59 4.27
 6 8 5 -1.03 3.16
 -6 8 -5 5.44 6.32
 6 8 6 0.94 3.35
 -6 8 -6 5.63 6.49
 6 8 7 3.61 3.53
 -6 8 -7 -0.61 4.13
 6 8 8 0.06 3.51
 -6 8 -8 2.15 4
 6 8 9 -0.21 3.65
 -6 8 -9 -5.66 4.16
 6 8 10 1.55 5.77
 -6 8 -10 3.15 4.16
 6 8 11 -1.23 5.81
 -6 8 -11 -0.31 4
 6 8 12 0.51 3.89
 -6 8 -12 2.26 4.1
 6 8 13 -2.22 3.97
 6 8 14 0.02 3.9
 6 8 15 -0.94 4.04
 6 -9 -10 2.12 5.03
 -6 9 10 4.06 5.02
 6 -9 -9 -2.16 4.71
 -6 9 9 0.83 4.76
 -6 9 8 6.04 7.91
 -6 9 7 -0.26 7.37
 -6 9 6 -0.08 4.64
 -6 9 5 1.62 4.77
 -6 9 4 2.6 4.96
 6 9 -3 -1.39 3.21
 -6 9 3 5.76 4.67
 6 9 -2 2.85 3.36
 -6 9 2 3.3 7.33
 6 9 -1 -3.71 3.44
 -6 9 1 4.97 7.74
 6 9 0 -3.93 3.43
 -6 9 0 2.84 4.9
 6 9 1 4.62 3.45
 -6 9 -1 -5.62 4.91
 6 9 2 -2.93 3.46
 -6 9 -2 8.94 4.83
 6 9 3 4.67 3.81
 -6 9 -3 4.38 4.92
 6 9 4 4.25 3.56
 -6 9 -4 -3.9 4.79
 6 9 5 1.07 3.61
 -6 9 -5 0.18 4.65
 6 9 6 1.22 3.7
 -6 9 -6 -0.83 7.28
 6 9 7 -6.2 5.9
 -6 9 -7 6.92 7.39
 7 0 -30 8.11 3.62
 7 0 -29 6.63 3.35
 7 0 -28 0.22 3.02
 7 0 -27 4.45 3.02
 7 0 -26 8.44 4.22
 -7 0 26 1.26 1.26
 7 0 -25 5.65 2.57
 -7 0 25 -0.41 2.03
 7 0 -24 3.49 2.62
 -7 0 24 5.73 2.17
 7 0 -23 -0.62 2.33
 -7 0 23 1.72 1.28
 7 0 -22 51 6
 -7 0 22 58.21 2.54
 7 0 -21 2.22 2.05
 7 0 -21 1.44 1.11
 -7 0 21 2.71 1.21
 7 0 -20 0.63 1.93
 7 0 -20 1.27 1.1
 -7 0 20 1.49 1.82
 7 0 -19 -0.1 1.83
 7 0 -19 0.91 1.04
 -7 0 19 2.25 1.67
 7 0 -18 -0.4 1.55
 7 0 -18 -2.89 2.65
 -7 0 18 0.72 1.62
 7 0 -17 1.92 1.65
 7 0 -17 0.56 0.97
 -7 0 17 -1.31 1.59
 7 0 -16 36.48 1.54
 7 0 -16 37.62 2.49
 -7 0 16 38.16 2.46
 7 0 -15 1.93 1.33
 7 0 -15 2.01 1.5
 -7 0 15 -0.06 0.97
 7 0 -14 39.36 1.43
 7 0 -14 34.58 3.31
 -7 0 14 35.19 1.6
 7 0 -13 0.52 1.21
 7 0 -13 0.7 1.26
 -7 0 13 1.72 0.92
 7 0 -12 151.47 5.01
 7 0 -12 145.78 3.54
 -7 0 12 150.9 3.96
 7 0 -11 0.39 0.71
 7 0 -11 1.18 1.79
 -7 0 11 2.32 1.35
 7 0 -10 1.28 0.7
 7 0 -10 0.34 1.07
 -7 0 10 -1.02 1.24
 7 0 -9 1.34 0.97
 7 0 -9 -1.62 0.72
 -7 0 9 -1.59 0.82
 7 0 -8 211.57 7.17
 7 0 -8 254.64 6.51
 -7 0 8 201.16 5.12
 7 0 -7 -1.21 0.87
 7 0 -7 0.47 0.72
 -7 0 7 -1.12 0.77
 7 0 -6 1.25 0.88
 7 0 -6 7.57 0.82
 -7 0 6 3.39 0.84
 -7 0 6 3.83 0.97
 7 0 -5 -1.6 0.77
 7 0 -5 0.38 0.77
 -7 0 5 -0.35 0.75
 -7 0 5 0.26 0.9
 7 0 -4 5.51 0.82
 7 0 -4 6.6 0.85
 -7 0 4 3.52 0.8
 -7 0 4 5.15 0.91
 7 0 -3 -1.07 1.23
 7 0 -3 0.77 0.69
 -7 0 3 1.27 0.78
 -7 0 3 -0.63 0.77
 7 0 -2 1.97 0.67
 7 0 -2 1.93 0.86
 -7 0 2 0.8 0.74
 -7 0 2 0.6 0.87
 7 0 -1 -0.53 0.6
 7 0 -1 -1 1.37
 -7 0 1 0.55 0.79
 -7 0 1 0.1 0.7
 7 0 0 6.29 1.11
 7 0 0 8.93 1.01
 -7 0 0 10.14 1.52
 7 0 1 0.26 0.57
 -7 0 -1 -0.27 0.95
 7 0 2 9.14 0.65
 -7 0 -2 12.42 1.62
 7 0 3 0.27 0.5
 -7 0 -3 1.32 1.02
 7 0 4 7.35 0.56
 -7 0 -4 9.12 1.18
 7 0 5 0.28 0.5
 -7 0 -5 0.05 1.68
 -7 0 -6 2.85 1.13
 -7 0 -7 1.06 1.22
 -7 0 -8 3.05 1.25
 -7 0 -9 0.62 1.21
 -7 0 -10 6.7 2.25
 -7 0 -11 2.52 2.21
 7 0 12 -0.83 0.62
 -7 0 -12 1.09 1.49
 7 0 13 0.63 0.99
 -7 0 -13 0.84 1.55
 7 0 14 5.86 0.79
 -7 0 -14 11.61 1.85
 7 0 15 0.5 0.74
 -7 0 -15 1.29 1.75
 7 0 16 24.85 1.83
 -7 0 -16 33.91 2.66
 7 0 17 1.49 0.84
 -7 0 -17 1.01 1.92
 -7 0 -18 7.28 2.2
 -7 0 -19 2.38 2.12
 -7 0 -20 0.52 3.37
 -7 0 -22 9.81 3.96
 -7 0 -23 -0.8 2.43
 -7 0 -24 2.73 2.57
 -7 0 -25 -1.65 2.62
 -7 0 -26 -2.76 2.78
 -7 0 -27 -6.27 2.88
 -7 0 -28 1.49 2.76
 -7 0 -29 4.5 4.54
 -7 0 -30 -0.84 4.47
 -7 0 -31 2.47 3.01
 7 -1 -34 -0.94 3.62
 7 -1 -33 1.17 3.56
 7 -1 -32 -3.17 3.42
 7 -1 -31 3.14 5.26
 7 -1 -30 -2.55 3.25
 7 -1 -29 -0.81 3.07
 7 -1 -28 3.38 2.94
 -7 1 28 -1.07 1.99
 7 -1 -27 5.43 4.48
 -7 1 27 -0.38 2.94
 7 -1 -26 1.94 2.76
 -7 1 26 1.51 1.99
 7 -1 -25 3.5 2.74
 -7 1 25 3.68 3.24
 7 -1 -24 1.2 4.03
 -7 1 24 5.05 2.01
 7 -1 -23 20.98 2.93
 7 1 -23 13.05 3.05
 -7 1 23 21.95 2.34
 7 1 -22 12.23 2.51
 7 -1 -22 7.13 2.44
 -7 -1 22 6.67 0.87
 -7 1 22 12.31 2.9
 7 1 -21 1.43 0.74
 7 1 -21 4.53 2.11
 7 -1 -21 2.82 2.07
 -7 -1 21 0.2 0.52
 -7 1 21 3.13 1.62
 7 1 -20 0.43 0.5
 7 1 -20 5.84 2.07
 7 -1 -20 1.15 2.03
 -7 -1 20 1.11 0.54
 -7 1 20 0.02 1.61
 7 1 -19 0.58 0.76
 7 1 -19 1.57 1.92
 7 -1 -19 4.5 1.84
 -7 -1 19 0.53 0.87
 -7 1 19 5.8 2.32
 7 1 -18 11.97 0.87
 7 1 -18 14.9 3.25
 7 -1 -18 14.73 2.12
 -7 -1 18 13.72 0.75
 -7 1 18 14.45 2.64
 7 1 -17 -0.32 1.65
 7 1 -17 -0.07 0.72
 7 -1 -17 2.89 1.73
 -7 -1 17 1.78 0.88
 -7 1 17 2.35 1.44
 7 1 -16 5.55 0.81
 7 1 -16 7.1 1.7
 7 -1 -16 -0.03 1.65
 -7 -1 16 6.39 0.94
 -7 1 16 6.56 1.52
 7 1 -15 -3.79 1.49
 7 -1 -15 2.14 2.27
 7 1 -15 1.97 0.74
 -7 -1 15 0.02 0.61
 -7 1 15 1.2 1.28
 7 1 -14 3.72 0.53
 7 -1 -14 5.55 1.49
 7 1 -14 3.18 1.48
 -7 -1 14 6.51 0.66
 -7 1 14 1.27 2.05
 7 1 -13 2.83 0.79
 7 -1 -13 -0.01 1.42
 7 1 -13 7.48 1.35
 -7 -1 13 3.72 0.63
 -7 1 13 5.18 1.32
 7 1 -12 2.51 0.52
 7 1 -12 6.41 1.95
 7 -1 -12 4.29 1.39
 -7 -1 12 3.23 0.98
 -7 1 12 0.35 1.21
 7 1 -11 6.37 1.25
 7 1 -11 4.2 0.81
 7 -1 -11 3.42 1.15
 7 -1 -11 5.61 1.33
 -7 -1 11 8.1 0.98
 -7 1 11 6.41 1.24
 7 1 -10 21.22 1.44
 7 1 -10 17.61 0.8
 7 -1 -10 17.49 1.35
 7 -1 -10 21.94 1.59
 -7 1 10 19.86 1.47
 -7 -1 10 17.71 0.82
 7 1 -9 40.82 1.16
 7 1 -9 47.21 1.75
 7 -1 -9 43.49 1.98
 7 -1 -9 45.63 1.8
 -7 -1 9 42.14 1.13
 -7 1 9 44.34 1.93
 7 1 -8 27.72 1.37
 7 1 -8 24 1.33
 7 -1 -8 27.33 1.41
 7 -1 -8 25.59 2.34
 -7 -1 8 24.42 0.88
 -7 1 8 22.66 2.18
 7 -1 -7 67.2 2.15
 7 1 -7 69.4 2.02
 7 1 -7 67.99 1.63
 7 -1 -7 67.61 2.33
 -7 -1 7 67.95 2.08
 -7 1 7 71.27 3.21
 7 1 -6 3.03 1.29
 7 -1 -6 7.37 1.49
 7 1 -6 5.13 1.1
 7 -1 -6 4.33 1.06
 -7 -1 6 3.07 0.95
 -7 -1 6 4.93 0.98
 -7 1 6 5.35 1.08
 7 1 -5 38.82 1.88
 7 1 -5 40.61 1.37
 7 -1 -5 38.24 1.66
 7 -1 -5 37.45 1.55
 -7 -1 5 41.35 1.48
 -7 1 5 41.21 1.63
 -7 -1 5 38.95 1.7
 7 1 -4 47.81 1.54
 7 1 -4 45.05 1.35
 7 -1 -4 51.86 1.83
 7 -1 -4 47.95 1.75
 -7 -1 4 47.75 2.02
 -7 -1 4 48.95 2
 -7 1 4 45.55 1.8
 7 1 -3 23.54 0.92
 7 1 -3 25.79 1.22
 7 -1 -3 23.47 1.37
 7 -1 -3 25.31 1.88
 -7 -1 3 22.29 0.99
 -7 -1 3 24.64 1.04
 -7 1 3 25.09 2.04
 7 1 -2 5.1 0.92
 7 1 -2 4.05 0.61
 7 -1 -2 4.38 0.88
 -7 1 2 4.88 1.02
 -7 -1 2 2.26 0.98
 -7 -1 2 2.38 0.81
 7 1 -1 45.94 1.06
 7 1 -1 49.1 1.74
 7 -1 -1 45.67 1.57
 -7 -1 1 46.17 1.16
 -7 1 1 42.7 1.69
 -7 -1 1 39.39 1.48
 7 -1 0 -1.49 0.85
 7 1 0 0 0.46
 7 1 0 3.2 1.07
 -7 -1 0 2.41 0.88
 -7 1 0 3.62 0.98
 -7 -1 0 1.58 0.52
 7 1 1 5.22 0.43
 7 -1 1 4.97 1.37
 -7 -1 -1 4.91 0.77
 -7 1 -1 3.52 1.07
 -7 -1 -1 4.53 1.01
 7 1 2 2.81 0.36
 -7 -1 -2 2.75 0.43
 -7 -1 -2 3.96 1.58
 -7 1 -2 3.05 1.48
 7 1 3 43.9 0.85
 -7 -1 -3 48.86 1.86
 -7 1 -3 45.22 1.94
 7 1 4 4.55 0.36
 -7 1 -4 6.44 1.23
 -7 -1 -4 3.57 1.17
 -7 -1 -5 355.36 11.9
 -7 1 -5 362.14 11.51
 -7 -1 -6 25.42 1.79
 -7 1 -6 26.91 1.61
 -7 1 -7 34.25 1.91
 -7 -1 -7 32.75 2.92
 -7 1 -8 23.88 2.68
 -7 -1 -8 30.11 3
 -7 -1 -9 120.19 4.6
 -7 1 -9 116.38 4.11
 -7 1 -10 -0.83 1.39
 -7 -1 -10 0.89 1.52
 -7 1 -11 9.41 1.59
 -7 -1 -11 5.92 1.67
 -7 -1 -12 1.02 1.73
 -7 1 -12 2.32 1.52
 -7 1 -13 5.14 2.54
 -7 -1 -13 4.42 1.9
 7 1 14 5.53 0.34
 -7 -1 -14 3.62 2.02
 -7 1 -14 8.9 2.7
 7 1 15 13.03 0.72
 -7 -1 -15 14.01 2.45
 -7 1 -15 15.35 2.89
 7 1 16 2.03 0.73
 -7 1 -16 5.36 2.68
 -7 -1 -16 5.18 3.29
 7 1 17 4.12 0.86
 -7 1 -17 9.43 1.96
 -7 -1 -17 4.17 3.62
 -7 1 -18 13.07 2.32
 -7 -1 -18 12.61 3.99
 -7 1 -19 3.42 2.14
 -7 -1 -19 5.37 2.48
 -7 -1 -20 5.18 2.63
 -7 1 -20 5.26 3.41
 -7 1 -21 -1.2 3.29
 -7 -1 -21 0.67 2.48
 -7 1 -22 -3.69 3.55
 -7 -1 -22 0.49 2.62
 -7 1 -23 0.7 3.72
 -7 -1 -23 -1.56 2.81
 -7 -1 -24 0.85 2.96
 -7 1 -24 -5.05 3.74
 -7 1 -25 1.83 2.52
 -7 -1 -25 -4.73 2.93
 -7 1 -26 3.84 2.63
 -7 -1 -26 1.66 4.89
 -7 -1 -27 3.59 3.21
 -7 1 -27 5.72 2.73
 -7 -1 -28 -0.67 3.2
 -7 1 -28 1.67 2.63
 -7 -1 -29 -2.04 3.24
 -7 1 -29 2.04 2.64
 -7 -1 -30 2.45 3.32
 -7 1 -30 -0.98 2.69
 -7 -1 -31 0.74 3.32
 7 -2 -35 -0.92 3.85
 7 -2 -34 -4.33 6.03
 7 -2 -33 -0.22 3.45
 7 -2 -32 0.26 3.45
 7 -2 -31 10.5 5.73
 7 -2 -30 -0.82 3.17
 -7 2 30 3.48 2.63
 7 -2 -29 6.06 3.36
 -7 2 29 4.84 4.24
 7 -2 -28 5.35 4.64
 -7 2 28 1.18 2.5
 7 -2 -27 3.14 2.95
 -7 2 27 -1.25 4.1
 7 -2 -26 6.55 2.82
 -7 2 26 -2.55 2.55
 7 -2 -25 2.59 4.24
 -7 2 25 2.73 2.47
 7 -2 -24 1.82 2.65
 -7 2 24 5.08 2.45
 7 -2 -23 2.08 2.42
 -7 2 23 0.93 2.25
 7 -2 -22 18.07 4.28
 -7 2 22 19.22 2.73
 7 -2 -21 6.84 2.41
 -7 2 21 10.17 2.42
 7 -2 -20 8.17 2.13
 -7 2 20 10.64 3.44
 7 -2 -19 -1.38 1.96
 -7 2 19 1.64 1.91
 7 -2 -18 5.71 1.94
 -7 2 18 1.2 3.15
 7 -2 -17 9.86 3.1
 -7 2 17 7.58 2.05
 7 -2 -16 -1.44 1.74
 -7 2 16 3.74 1.78
 7 -2 -15 11.29 2.95
 -7 2 15 13.18 3.18
 7 -2 -14 5.99 1.78
 -7 2 14 6.14 1.76
 7 -2 -13 63.92 3
 -7 -2 13 56.02 1.01
 -7 -2 13 62.21 0.96
 -7 2 13 61.26 3.22
 7 -2 -12 16.16 1.81
 -7 -2 12 13.68 0.71
 -7 -2 12 15.54 0.46
 -7 2 12 13.39 1.88
 7 -2 -11 5.36 1.45
 -7 -2 11 5.54 0.68
 -7 -2 11 5.67 0.74
 -7 2 11 6.32 1.64
 7 -2 -10 11.25 1.59
 -7 -2 10 8.56 0.56
 -7 -2 10 10.54 0.79
 -7 2 10 11.79 2.55
 7 -2 -9 0.5 1.36
 -7 -2 9 0.37 0.5
 -7 -2 9 0.73 0.51
 -7 2 9 4.11 1.39
 7 -2 -8 17.4 1.67
 -7 -2 8 18.01 1.12
 -7 -2 8 16.59 1.12
 -7 2 8 19.89 1.78
 7 -2 -7 4.3 2.09
 -7 -2 7 5.83 0.66
 -7 -2 7 6.46 1.08
 -7 2 7 5.41 2.2
 7 -2 -6 6.07 1.27
 -7 -2 6 5.36 1.05
 -7 -2 6 3.56 1.1
 -7 2 6 2.92 1.49
 7 -2 -5 12.08 1.41
 -7 -2 5 12.22 1.27
 -7 -2 5 11.49 1.35
 -7 -2 5 9.46 1.03
 -7 2 5 13.82 1.48
 7 -2 -4 6.01 1.33
 -7 -2 4 6.62 0.83
 -7 -2 4 5.24 0.86
 -7 -2 4 7.42 0.87
 -7 2 4 4.99 2.15
 7 -2 -3 3.75 1.35
 -7 -2 3 3.56 0.91
 -7 -2 3 7.19 0.77
 -7 -2 3 5.97 1.37
 -7 2 3 4.15 1.36
 7 -2 -2 0 1.87
 -7 -2 2 2.62 0.89
 -7 -2 2 0.94 0.9
 -7 -2 2 0.64 0.66
 -7 2 2 -0.32 1.84
 -7 -2 1 21.93 0.89
 -7 -2 1 27.48 1.37
 -7 -2 1 22.74 1.32
 -7 2 1 22.01 1.66
 -7 -2 0 12.74 0.96
 -7 -2 0 16.04 1.85
 -7 2 0 10.29 1.5
 -7 -2 -1 0.87 0.47
 -7 2 -1 -2.07 1.19
 -7 -2 -1 -1.79 1.01
 -7 -2 -2 0.84 0.41
 -7 -2 -2 1.52 1.14
 -7 2 -2 2.72 1.24
 -7 -2 -3 -0.09 1.15
 -7 -2 -3 -0.01 0.34
 -7 2 -3 1.86 1.24
 -7 -2 -4 8.66 0.31
 -7 -2 -4 10.95 1.44
 -7 2 -4 7.8 2.13
 -7 2 -5 0.81 1.24
 -7 -2 -5 1.51 1.33
 -7 -2 -6 3.9 2.16
 -7 2 -6 1.68 1.34
 -7 -2 -7 2.76 2.32
 -7 2 -7 -0.73 1.95
 -7 -2 -8 9.53 2.55
 -7 2 -8 6.19 1.48
 -7 -2 -9 8.75 2.74
 -7 2 -9 6.73 1.53
 -7 -2 -10 0.08 2.57
 -7 2 -10 -0.05 1.37
 -7 -2 -11 0.44 2.79
 -7 2 -11 -3.57 2.36
 -7 -2 -12 4.36 1.92
 -7 2 -12 4.01 1.64
 -7 2 -13 2.06 1.74
 -7 -2 -13 1.09 1.95
 -7 -2 -14 0.3 2.05
 -7 2 -14 3.07 1.75
 -7 -2 -15 10.88 2.42
 -7 2 -15 6.39 2.02
 -7 -2 -16 4.78 2.23
 -7 2 -16 4.93 1.89
 -7 2 -17 6.98 2.1
 -7 -2 -17 1.88 2.51
 -7 2 -18 6.77 3.5
 -7 -2 -18 8.36 2.75
 -7 2 -19 10.06 3.69
 -7 -2 -19 9.98 3.02
 -7 -2 -20 6.41 2.88
 -7 2 -20 8.15 3.83
 -7 2 -21 7.14 3.95
 -7 -2 -21 10.53 4.91
 -7 -2 -22 0.19 3.05
 -7 2 -22 -2.53 3.65
 -7 2 -23 4.33 3.77
 -7 -2 -23 1.64 3.3
 -7 -2 -24 0.01 3.27
 -7 2 -24 4.2 3.66
 -7 -2 -25 3.33 3.33
 -7 2 -25 -1.38 2.41
 -7 2 -26 -0.23 2.37
 -7 -2 -26 0.17 3.33
 -7 2 -27 0.37 2.45
 -7 -2 -27 -1.5 5.26
 -7 -2 -28 -3.51 5.55
 -7 2 -28 3.24 2.63
 -7 -2 -29 3.48 3.73
 -7 -2 -30 1.31 3.9
 7 -3 -34 0.96 5.67
 7 -3 -33 4.93 3.82
 7 -3 -32 0.22 3.4
 -7 3 32 0.72 3.34
 7 -3 -31 4.94 5.46
 -7 3 31 0.09 4.85
 7 -3 -30 4.9 3.46
 -7 3 30 5.06 3.25
 7 -3 -29 0.8 3.25
 -7 3 29 4.3 3.15
 7 -3 -28 2.9 3.21
 -7 3 28 3.56 3.34
 7 -3 -27 1.31 3.03
 -7 3 27 4.65 3.08
 7 -3 -26 -0.85 2.9
 -7 3 26 1.8 2.87
 7 -3 -25 3.59 2.8
 -7 3 25 0.35 2.77
 7 -3 -24 6.64 2.86
 -7 3 24 1.27 4.68
 7 -3 -23 3.42 4.06
 -7 3 23 0.15 2.71
 7 -3 -22 23.74 3.31
 -7 3 22 26.14 5.53
 7 -3 -21 -1.31 2.29
 -7 3 21 -0.16 2.62
 7 -3 -20 -0.52 2.28
 -7 3 20 0.68 3.76
 7 -3 -19 16.37 2.74
 -7 3 19 15.15 3
 7 -3 -18 5.24 3.54
 -7 3 18 3.33 3.77
 7 -3 -17 3.79 2.26
 -7 3 17 7.29 2.52
 7 -3 -16 5.29 3.05
 -7 3 16 -1.15 3.57
 7 -3 -15 -2.27 1.91
 -7 3 15 5.27 2.17
 7 -3 -14 -5.39 2.85
 -7 3 14 4.62 3.24
 7 -3 -13 1 1.91
 -7 3 13 3.77 2.07
 7 -3 -12 3.75 1.74
 -7 -3 12 0.35 0.56
 -7 3 12 1.01 2.97
 -7 -3 12 0 0.69
 7 -3 -11 2.59 1.78
 -7 -3 11 1.02 0.74
 -7 -3 11 2.76 0.92
 -7 3 11 3.5 1.89
 7 -3 -10 10.25 1.89
 -7 -3 10 7.18 0.9
 -7 3 10 11.51 3.1
 -7 -3 10 7.79 1.17
 7 -3 -9 27.32 2.54
 -7 -3 9 35.37 1.52
 -7 -3 9 32.79 1.87
 -7 3 9 34.54 2.82
 7 -3 -8 33.47 3.62
 -7 3 8 30.42 3.86
 -7 -3 8 28.95 1.3
 -7 -3 8 27.7 1.6
 7 -3 -7 12.91 1.98
 -7 3 7 15.38 2.11
 -7 -3 7 14.89 1.65
 -7 -3 7 12.35 0.96
 7 -3 -6 -0.36 2.55
 -7 -3 6 3.21 0.88
 -7 3 6 3.15 2.68
 -7 -3 6 3.22 0.98
 7 -3 -5 21.2 2.35
 -7 -3 5 25.12 1.86
 -7 3 5 29.74 2.28
 -7 -3 5 18.02 1.41
 -7 -3 4 1.55 1.03
 -7 3 4 2.99 2.45
 -7 -3 4 1.99 1.67
 -7 -3 3 11.9 1.23
 -7 3 3 7.88 1.88
 -7 -3 3 7.12 1.07
 -7 -3 2 10.93 1.05
 -7 -3 2 12.74 1.33
 -7 3 2 9.46 2.76
 -7 -3 1 1.18 0.83
 -7 -3 1 3.99 1.78
 -7 3 1 3.12 1.66
 -7 -3 0 9.1 0.84
 -7 -3 0 7 1.39
 -7 3 0 10.69 2.69
 -7 -3 -1 3.56 1.33
 -7 -3 -1 3.29 0.69
 -7 3 -1 3.68 1.61
 -7 -3 -2 1.94 0.6
 -7 -3 -2 2.28 1.38
 -7 3 -2 2.6 1.61
 -7 -3 -3 2.34 1.48
 -7 3 -3 2.42 1.53
 -7 -3 -3 1.25 0.53
 -7 -3 -4 1.71 1.49
 -7 -3 -4 1.16 0.48
 -7 3 -4 2.37 1.55
 -7 -3 -5 46.01 1.18
 -7 3 -5 48.68 2.65
 -7 -3 -5 50.58 2.8
 -7 -3 -6 4.63 0.5
 -7 -3 -6 3.99 1.75
 -7 3 -6 2.28 1.65
 -7 -3 -7 7.62 0.36
 -7 -3 -7 7.11 1.92
 -7 3 -7 6.51 1.81
 -7 -3 -7 7.15 0.46
 -7 -3 -8 9.04 2.13
 -7 3 -8 9.8 1.86
 -7 -3 -9 0.81 1.92
 -7 3 -9 -0.31 2.57
 -7 -3 -10 17.94 2.54
 -7 3 -10 15.77 2.12
 -7 -3 -11 2.21 2.23
 -7 3 -11 3.76 1.82
 -7 -3 -12 3.17 2.31
 -7 3 -12 5.42 1.93
 -7 3 -13 15.35 3.4
 -7 -3 -13 7.28 4.18
 -7 -3 -14 12.68 4.45
 -7 3 -14 9.47 3.21
 -7 3 -15 5.12 2.06
 -7 -3 -15 4.95 2.77
 -7 -3 -16 0.68 2.79
 -7 3 -16 3.99 2.03
 -7 3 -17 4.17 2.16
 -7 -3 -17 2.21 2.99
 -7 -3 -18 16.58 3.66
 -7 3 -18 13.77 2.68
 -7 -3 -19 3.24 3.15
 -7 3 -19 1.41 2.28
 -7 -3 -20 5.13 3.42
 -7 3 -20 3.38 2.34
 -7 -3 -21 -2.88 5.16
 -7 3 -21 2.69 2.25
 -7 -3 -22 3.55 4.79
 -7 3 -22 2.27 2.31
 -7 -3 -23 0.11 3.25
 -7 3 -23 1.26 2.33
 -7 -3 -24 4.38 3.42
 -7 3 -24 2.97 2.42
 -7 -3 -25 2.53 3.52
 -7 3 -25 2.96 2.41
 -7 -3 -26 0.6 3.44
 -7 3 -26 0.36 2.38
 -7 -3 -27 10.26 6.35
 -7 -3 -28 5.16 4.03
 -7 -3 -29 -4.69 4.21
 7 -4 -32 3.69 3.82
 -7 4 32 8.18 6.21
 7 -4 -31 -7.95 5.67
 -7 4 31 -1.71 3.91
 7 -4 -30 1.31 3.42
 -7 4 30 1.47 3.61
 7 -4 -29 -0.15 3.16
 -7 4 29 -0.85 3.61
 7 -4 -28 3.58 3.2
 -7 4 28 0.94 3.56
 7 -4 -27 0.17 3.33
 -7 4 27 21.13 5.68
 7 -4 -26 -10.54 4.59
 -7 4 26 1.95 3.48
 7 -4 -25 -0.82 2.89
 -7 4 25 -1.87 3.25
 7 -4 -24 4.54 2.83
 -7 4 24 -2.59 3.24
 7 -4 -23 8.09 3.02
 -7 4 23 0.53 3.41
 7 -4 -22 2.73 2.87
 -7 4 22 8.38 5.09
 7 -4 -21 2.36 4.09
 -7 4 21 0.01 3.09
 7 -4 -20 -1.34 2.7
 -7 4 20 -5.79 3.12
 7 -4 -19 3.8 2.61
 -7 4 19 2.07 2.94
 7 -4 -18 2.43 2.57
 -7 4 18 6.44 2.89
 7 -4 -17 3.27 2.39
 -7 4 17 1.65 4.52
 7 -4 -16 4.35 2.54
 -7 4 16 8.73 3.12
 7 -4 -15 7.57 2.48
 -7 4 15 5.69 4.5
 7 -4 -14 4.15 3.54
 -7 4 14 3.95 2.81
 7 -4 -13 4.81 2.22
 -7 -4 13 0.48 0.52
 -7 4 13 2.3 2.61
 7 -4 -12 5.78 3.31
 -7 -4 12 1.83 0.57
 -7 -4 12 1.51 1.15
 -7 4 12 3.12 2.46
 7 -4 -11 3.51 2.16
 -7 -4 11 2.27 0.73
 -7 -4 11 2.09 0.92
 -7 4 11 2.65 2.42
 7 -4 -10 14.07 3.83
 -7 -4 10 12.61 0.96
 -7 -4 10 10.21 1.22
 -7 4 10 11.5 4.06
 7 -4 -9 4.03 2.33
 -7 -4 9 3.21 1.2
 -7 -4 9 3.15 1.57
 -7 4 9 3.92 2.39
 7 -4 -8 2.64 3.59
 -7 -4 8 1.43 1.89
 -7 -4 8 6.31 1.13
 -7 4 8 0.74 3.68
 7 -4 -7 19.49 2.95
 -7 -4 7 20.56 2.1
 -7 -4 7 21 1.72
 -7 4 7 16.41 2.84
 7 -4 -6 -1.22 3.61
 -7 -4 6 -1.25 1.15
 -7 4 6 1 2.19
 -7 -4 5 3.33 1.26
 -7 4 5 5.84 2.09
 -7 4 4 4.61 2.11
 7 4 -3 5.75 1.24
 -7 4 3 5.88 3.29
 7 4 -2 7.28 1.33
 -7 4 2 5.31 2.16
 7 4 -1 4.33 1.34
 -7 4 1 1.92 2.03
 7 4 0 4.35 1.34
 -7 4 0 11.22 3.21
 7 4 1 7.21 1.54
 -7 4 -1 8.29 2.22
 7 4 2 -0.47 1.41
 -7 4 -2 0.38 1.95
 7 4 3 5.42 1.64
 -7 4 -3 0.58 3.2
 7 4 4 -0.25 1.57
 -7 4 -4 0.33 1.88
 7 4 5 1.31 1.64
 -7 4 -5 -3.47 1.95
 7 4 6 4.17 1.74
 -7 4 -6 4.16 3.13
 7 4 7 6.07 2.01
 -7 4 -7 11.16 2.17
 7 4 8 -0.51 1.86
 -7 4 -8 1.02 2
 7 4 9 2.12 1.92
 -7 -4 -9 0.38 0.9
 -7 4 -9 -0.24 2.02
 7 4 10 6.97 2.08
 -7 -4 -10 2.01 0.77
 -7 4 -10 1 3.2
 7 4 11 0.49 2.08
 -7 4 -11 3.23 2.08
 -7 -4 -11 0.85 0.55
 7 4 12 8.08 2.53
 -7 4 -12 8.26 2.35
 7 4 13 -1.59 2.25
 -7 4 -13 3.18 2.2
 -7 -4 -14 5.35 2.92
 -7 4 -14 2.45 2.28
 -7 -4 -15 3.4 2.93
 -7 4 -15 -1.05 3.6
 -7 -4 -16 6.98 3.2
 -7 4 -16 5.3 3.9
 -7 -4 -17 12.95 3.59
 -7 4 -17 8.73 4.28
 -7 -4 -18 -1.59 3.4
 -7 4 -18 6.36 2.58
 -7 -4 -19 3.42 3.29
 -7 4 -19 -1.85 2.45
 -7 -4 -20 12.75 5.01
 -7 4 -20 -2.53 2.48
 -7 -4 -21 -2.02 3.73
 -7 4 -21 3.78 2.5
 -7 -4 -22 7.03 3.88
 -7 4 -22 4.62 2.59
 -7 4 -23 4.7 2.63
 -7 -4 -23 1.3 4.01
 -7 -4 -24 1.64 3.85
 -7 -4 -25 4.78 4.14
 -7 -4 -26 -10.71 7.25
 -7 -4 -27 2.56 4
 -7 -4 -28 3.92 4.2
 7 -5 -30 1.44 3.52
 -7 5 30 2.6 6.52
 7 -5 -29 1.78 3.44
 -7 5 29 -5.53 4.09
 7 -5 -28 2.07 5.27
 -7 5 28 -7.25 4.24
 7 -5 -27 3.63 3.42
 -7 5 27 10.08 6.4
 7 -5 -26 -5.3 3.3
 -7 5 26 -1.63 3.91
 7 -5 -25 4.31 3.41
 -7 5 25 7.24 3.95
 7 -5 -24 0.69 3.1
 -7 5 24 -2.27 3.76
 7 -5 -23 5.79 4.77
 -7 5 23 -5.87 3.76
 7 -5 -22 7.29 3.5
 -7 5 22 17.17 6.36
 7 -5 -21 -0.79 3.14
 -7 5 21 -6.17 3.76
 7 -5 -20 3.6 3
 -7 5 20 2.76 3.72
 7 -5 -19 -0.55 2.9
 -7 5 19 -2.21 5.17
 7 -5 -18 4.3 4.67
 -7 5 18 4.58 3.6
 7 -5 -17 6.5 3.12
 -7 5 17 9.65 3.5
 7 -5 -16 4.05 4.5
 -7 5 16 4.59 5.42
 7 -5 -15 4.53 2.83
 -7 5 15 -1.37 3.31
 -7 5 14 3.12 3.29
 7 -5 -13 -0.94 2.8
 -7 -5 13 1.22 0.75
 -7 5 13 5.66 3.06
 7 -5 -12 1.42 2.78
 -7 -5 12 2 1.58
 -7 5 12 4.72 3.24
 7 -5 -11 0.74 2.84
 -7 5 11 -2.6 3.08
 -7 -5 11 7.07 1.8
 7 -5 -10 14.93 3.28
 -7 -5 10 12.66 1.62
 -7 -5 10 13.03 1.47
 -7 5 10 17.91 3.47
 7 -5 -9 4.68 2.88
 -7 5 9 -2.06 2.85
 7 5 -8 12.68 1.51
 7 -5 -8 19.66 3.62
 -7 5 8 20.04 3.5
 7 5 -7 13.7 1.49
 -7 5 7 9.6 3.2
 7 5 -6 0.89 1.31
 -7 5 6 -2.28 2.71
 7 5 -5 1.08 1.4
 -7 5 5 0.47 2.68
 7 5 -4 1.05 2.18
 -7 5 4 2.52 2.63
 7 5 -3 6.37 2.61
 -7 5 3 4.37 2.79
 7 5 -2 6.1 2.67
 -7 5 2 1.98 2.71
 7 5 -1 1.31 1.66
 -7 5 1 -2.32 2.44
 7 5 0 -3.15 1.74
 -7 5 0 3.72 2.45
 7 5 1 11.78 2.15
 -7 5 -1 9.16 2.82
 7 5 2 21.89 2.52
 -7 5 -2 20.01 4.94
 7 5 3 1.51 2.09
 -7 5 -3 6.96 2.54
 7 5 4 6.83 2.21
 -7 5 -4 4.7 2.66
 7 5 5 -2.04 2.19
 -7 5 -5 -1 2.56
 7 5 6 4.45 2.28
 -7 5 -6 -0.94 3.98
 7 5 7 13.36 4.34
 -7 5 -7 21.44 3.2
 7 5 8 4.98 3.41
 -7 5 -8 3.39 2.79
 7 5 9 7.08 3.67
 -7 5 -9 1.97 2.75
 7 5 10 -0.81 2.39
 -7 -5 -10 1.97 1.44
 -7 5 -10 -1.25 4.1
 7 5 11 -0.49 2.41
 -7 -5 -11 1.28 1.36
 -7 5 -11 0.06 2.6
 7 5 12 4.08 2.78
 -7 5 -12 4.08 2.82
 7 5 13 3.69 2.9
 -7 5 -13 7.11 2.94
 7 5 14 0.6 2.66
 -7 5 -14 -0.58 2.63
 7 5 15 3.15 2.85
 -7 5 -15 -0.29 2.82
 7 5 16 2.19 2.88
 -7 5 -16 1.95 2.8
 7 5 17 1.46 3.01
 -7 5 -17 0.84 4.36
 -7 5 -18 5.44 4.49
 -7 -5 -19 1.92 3.58
 -7 5 -19 -1.95 4.25
 -7 -5 -20 0.14 3.71
 -7 5 -20 1.72 4.23
 -7 -5 -21 9.63 4.06
 -7 5 -21 8.03 4.7
 -7 -5 -22 6.39 4.08
 -7 -5 -23 1.05 3.99
 -7 -5 -24 3.98 6.87
 -7 -5 -25 -1.09 4.36
 -7 -5 -26 4.09 4.57
 7 -6 -27 -3.29 5.39
 -7 6 27 2.91 6.97
 7 -6 -26 0.83 3.62
 -7 6 26 -8.24 4.38
 7 -6 -25 -1.47 3.5
 -7 6 25 -2.66 4.18
 7 -6 -24 3.68 3.61
 -7 6 24 3.85 6.52
 7 -6 -23 1.14 3.5
 -7 6 23 8.2 4.18
 7 -6 -22 15.13 5.86
 -7 6 22 7.51 4.54
 7 -6 -21 -4.36 3.36
 -7 6 21 8.93 6.33
 7 -6 -20 -1.92 5.09
 -7 6 20 7.68 4.23
 7 -6 -19 0.4 3.46
 -7 6 19 5.89 4.17
 7 -6 -18 -1.51 3.35
 -7 6 18 9.82 5.89
 7 -6 -17 -3.17 3.6
 -7 6 17 -0.17 3.81
 7 -6 -16 6.12 3.99
 -7 6 16 14.93 4.32
 7 -6 -15 9.98 5.71
 -7 6 15 6.45 4.07
 7 -6 -14 -8.67 3.52
 -7 6 14 -3.58 4.05
 -7 6 13 6.2 3.97
 7 -6 -12 9.28 3.83
 -7 6 12 8.08 4.13
 7 -6 -11 4.89 3.67
 -7 6 11 10.55 6.09
 7 6 -10 -0.3 1.32
 7 -6 -10 -4.1 5.33
 -7 6 10 3.62 3.66
 7 6 -9 3.14 1.54
 7 -6 -9 3.93 3.58
 -7 6 9 0.62 3.65
 7 6 -8 3.79 1.69
 7 -6 -8 15.41 5.79
 -7 6 8 12.18 5.51
 7 6 -7 26.43 3.91
 -7 6 7 35.13 4.81
 7 6 -6 6.59 1.99
 -7 6 6 0.14 3.5
 7 6 -5 6.6 2.07
 -7 6 5 5.89 3.58
 7 6 -4 4.92 1.98
 -7 6 4 -9.95 5.18
 7 6 -3 3.19 2.07
 -7 6 3 0.51 3.24
 7 6 -2 3.23 2.13
 -7 6 2 0.61 3.26
 7 6 -1 1.81 2.21
 -7 6 1 6.96 3.26
 7 6 0 18.71 2.81
 -7 6 0 14.58 5.85
 7 6 1 3.65 2.28
 -7 6 -1 -2.05 3.14
 7 6 2 1.97 2.31
 -7 6 -2 -3.06 3.08
 7 6 3 -2.17 2.42
 -7 6 -3 2.47 3.1
 7 6 4 -2.97 2.44
 -7 6 -4 8.41 4.71
 7 6 5 3.34 2.6
 -7 6 -5 6.89 3.2
 7 6 6 -1.2 2.57
 -7 6 -6 3.78 3.16
 7 6 7 3.59 2.82
 -7 6 -7 4.31 3.31
 7 6 8 4.01 2.88
 -7 6 -8 0.36 3.23
 7 6 9 1.95 2.98
 -7 6 -9 4.15 5.13
 7 6 10 8.09 3.12
 -7 6 -10 -2.56 5.29
 7 6 11 6.68 4.73
 -7 6 -11 -1.98 3.12
 7 6 12 -1.36 4.32
 -7 6 -12 0.75 3.23
 7 6 13 12.42 3.43
 -7 6 -13 7.52 3.71
 7 6 14 1.83 3.15
 -7 6 -14 4.49 3.34
 7 6 15 1.13 3.08
 -7 6 -15 1.56 3.24
 7 6 16 2.61 3.22
 -7 6 -16 -1.23 3.24
 7 6 17 -2.03 3.2
 -7 6 -17 3.95 5.16
 7 6 18 -3.8 3.42
 -7 6 -18 -2.43 5.16
 7 6 19 4.18 3.51
 7 6 20 3.58 3.64
 -7 -6 -21 4.91 4.36
 -7 -6 -22 6.7 4.64
 -7 -6 -23 0.27 4.27
 7 -7 -23 7.71 6.34
 -7 7 23 4.5 7.58
 7 -7 -22 5.81 3.72
 -7 7 22 -2.6 4.63
 7 -7 -21 -2.1 5.62
 -7 7 21 1.98 4.37
 7 -7 -20 3.22 3.93
 -7 7 20 5.35 4.59
 7 -7 -19 0.82 3.76
 -7 7 19 1.44 4.32
 7 -7 -18 1.97 5.74
 -7 7 18 -1.33 4.21
 7 -7 -17 -0.8 3.79
 -7 7 17 0.59 4.26
 7 -7 -16 -6.24 6.23
 -7 7 16 -2.71 6.59
 7 -7 -15 4.19 4.08
 -7 7 15 8.94 4.57
 7 -7 -14 4.93 3.98
 -7 7 14 4.5 4.25
 7 -7 -13 -4.13 6.1
 -7 7 13 0.65 3.88
 7 -7 -12 -7.32 4.17
 -7 7 12 6.12 6.84
 7 -7 -11 11.16 4.28
 -7 7 11 1.4 4.54
 7 -7 -10 8.43 4.44
 -7 7 10 -0.58 4.33
 7 -7 -9 19.36 4.9
 -7 7 9 11 4.91
 7 7 -8 8.18 3.52
 -7 7 8 4.48 6.81
 7 7 -7 0.92 2.28
 -7 7 7 6.65 4.37
 7 7 -6 4.85 2.35
 -7 7 6 6.44 4.26
 7 7 -5 -1.28 2.31
 -7 7 5 -1.75 4.11
 7 7 -4 -1.81 2.43
 -7 7 4 3.32 6.07
 7 7 -3 3.29 2.54
 -7 7 3 6.15 4
 7 7 -2 4.61 2.66
 -7 7 2 11.11 4.08
 7 7 -1 3.6 2.66
 -7 7 1 -0.38 3.81
 7 7 0 1.78 2.67
 -7 7 0 0.78 3.68
 7 7 1 7.52 2.92
 -7 7 -1 3.09 6.33
 7 7 2 6.7 2.94
 -7 7 -2 6.21 3.95
 7 7 3 -0.04 2.78
 -7 7 -3 4.6 3.73
 7 7 4 0.88 2.8
 -7 7 -4 -3.25 3.67
 7 7 5 3.2 3.03
 -7 7 -5 1.02 3.85
 7 7 6 0.3 2.94
 -7 7 -6 3.84 5.81
 7 7 7 4.86 3.3
 -7 7 -7 3.18 3.87
 7 7 8 5.62 3.29
 -7 7 -8 1.36 3.93
 7 7 9 3.95 3.44
 -7 7 -9 3.02 3.81
 7 7 10 -3.83 3.35
 -7 7 -10 2.74 3.74
 7 7 11 1.19 3.29
 -7 7 -11 1.52 3.75
 7 7 12 0.15 3.51
 -7 7 -12 3.69 3.82
 7 7 13 10.51 5.99
 -7 7 -13 6.73 4.18
 7 7 14 4.15 5.07
 -7 7 -14 -5.64 5.75
 7 7 15 4.52 3.62
 7 7 16 -0.94 3.45
 -7 7 -16 4.96 5.79
 7 7 17 7.4 3.85
 7 7 18 3.13 3.81
 7 7 19 -1.85 3.78
 7 -8 -18 7.06 4.62
 -7 8 18 6.04 5.08
 7 -8 -17 4.72 4.41
 -7 8 17 3.57 5.01
 7 -8 -16 -2.4 6.62
 -7 8 16 -1.18 4.76
 7 -8 -15 0.68 4.36
 -7 8 15 9.94 4.9
 7 -8 -14 1.9 4.09
 -7 8 14 -4.22 4.69
 7 -8 -13 4.62 4.36
 -7 8 13 -4.93 7.37
 7 -8 -12 -2.5 4.4
 -7 8 12 5.88 4.47
 7 -8 -11 -2.09 6.59
 -7 8 11 0.9 4.41
 7 -8 -10 2.7 4.37
 -7 8 10 -1.16 4.47
 7 -8 -9 9.11 4.97
 -7 8 9 3.69 7.22
 7 -8 -8 -5.73 6.88
 -7 8 8 3.74 4.46
 -7 8 7 -2.37 4.58
 -7 8 6 8.82 4.99
 7 8 -5 7.93 2.94
 -7 8 5 2.54 4.69
 7 8 -4 9.11 3.05
 -7 8 4 2.66 7.4
 -7 8 3 5.11 4.83
 7 8 -2 -2.64 2.89
 -7 8 2 -0.52 4.5
 7 8 -1 12.21 3.25
 -7 8 1 3.02 4.82
 7 8 0 -2.56 3.03
 -7 8 0 0.45 4.57
 7 8 1 -8.88 3.35
 -7 8 -1 -4.07 7.39
 7 8 2 -3.16 3.22
 -7 8 -2 3.34 6.68
 7 8 3 3.94 3.26
 -7 8 -3 7.65 4.39
 7 8 4 -3.56 3.17
 -7 8 -4 6.34 4.08
 7 8 5 1.8 3.37
 -7 8 -5 4.09 4.32
 7 8 6 -7.15 3.38
 -7 8 -6 5.25 4.39
 7 8 7 0.63 3.34
 -7 8 -7 -0.21 4.22
 7 8 8 6.64 3.61
 -7 8 -8 -0.99 4.39
 7 8 9 -3.89 3.66
 -7 8 -9 2.12 6.59
 7 8 10 -1.05 3.59
 -7 8 -10 2.32 6.5
 7 8 11 8.5 4.05
 -7 8 -11 -2.01 7.13
 7 8 12 1.6 3.84
 -7 8 -12 -0.94 4.2
 7 8 13 -3.99 6.09
 -7 8 -13 1.75 4.21
 7 8 14 4.6 6.05
 7 -9 -8 17.93 5.51
 -7 9 8 -1.06 5.35
 -7 9 7 -3.06 5.03
 -7 9 6 1.22 4.8
 -7 9 5 -1.66 4.74
 -7 9 4 5.26 8.21
 -7 9 3 1.89 5.02
 7 9 -2 5.66 3.54
 -7 9 2 5.94 5.35
 7 9 -1 1.37 3.55
 -7 9 1 6.17 5.1
 7 9 0 0.34 3.44
 -7 9 0 -3.3 5.02
 7 9 1 6.34 3.77
 -7 9 -1 11.25 5.46
 7 9 2 1.69 3.6
 -7 9 -2 10.83 7.96
 7 9 3 0.06 3.51
 -7 9 -3 4.87 7.75
 7 9 4 7.46 3.67
 -7 9 -4 -1.76 5.32
 8 0 -31 -0.42 3.33
 8 0 -30 2.34 3.35
 8 0 -29 5.97 3.5
 8 0 -28 2.83 3.06
 8 0 -27 6.86 4.91
 8 0 -26 6.56 3.05
 8 0 -25 -2.3 2.76
 -8 0 25 2.13 1.36
 8 0 -24 7.39 2.69
 -8 0 24 3.15 2.29
 8 0 -23 2.73 3.6
 -8 0 23 -2.74 2.18
 8 0 -22 -1.54 2.4
 -8 0 22 -5.07 2.13
 8 0 -21 1.01 2.2
 8 0 -21 2.09 1.73
 -8 0 21 1.3 1.28
 8 0 -20 34.76 2.71
 8 0 -20 41.72 3.31
 -8 0 20 41.71 2.14
 8 0 -19 1.02 1.07
 8 0 -19 5.98 2.92
 -8 0 19 -0.23 1.22
 8 0 -18 46.1 2.04
 8 0 -18 49.85 3.16
 -8 0 18 48.14 2.24
 8 0 -17 -0.81 1.77
 8 0 -17 1.04 1.57
 -8 0 17 -0.44 1.21
 8 0 -16 41.38 1.77
 8 0 -16 52.42 2.95
 -8 0 16 45.86 2.05
 8 0 -15 -0.83 0.96
 8 0 -15 1.91 2.39
 -8 0 15 2.05 1.12
 8 0 -14 0.75 1.46
 8 0 -14 2.29 1.42
 -8 0 14 1.82 1.71
 8 0 -13 2.15 1.35
 8 0 -13 1.8 0.88
 -8 0 13 2.57 1.61
 8 0 -12 2.33 1.35
 8 0 -12 2.32 1.42
 -8 0 12 -0.34 1.59
 8 0 -11 0.51 0.87
 8 0 -11 1 1.21
 -8 0 11 -1.24 1.45
 8 0 -10 12.47 1.57
 8 0 -10 11.81 1.4
 -8 0 10 12.78 1.72
 8 0 -9 1.03 0.88
 8 0 -9 1.69 1.09
 -8 0 9 -0.36 1.41
 8 0 -8 16.26 1.34
 8 0 -8 15.87 1.67
 -8 0 8 16.34 1.73
 8 0 -7 2.24 0.98
 8 0 -7 1.28 0.93
 -8 0 7 2.86 1.41
 8 0 -6 0.61 1.43
 8 0 -6 2.9 1.41
 -8 0 6 4.57 1.43
 8 0 -5 -0.33 0.94
 8 0 -5 1.42 0.9
 -8 0 5 -0.13 1.03
 -8 0 5 1.12 0.87
 8 0 -4 9.85 1
 8 0 -4 14.18 1.74
 -8 0 4 11.42 1.08
 -8 0 4 9.81 1.04
 8 0 -3 -0.51 0.77
 -8 0 3 1.18 1.35
 -8 0 3 0.71 0.92
 8 0 -2 8.69 0.87
 -8 0 2 4.55 1.08
 -8 0 2 9.34 1.45
 8 0 -1 -1.75 0.72
 -8 0 1 -0.48 0.85
 -8 0 1 0.14 0.99
 8 0 0 0.9 0.67
 -8 0 0 0.84 0.97
 8 0 1 1.92 0.68
 -8 0 -1 2.73 1.11
 8 0 2 0.37 0.95
 -8 0 -2 -0.75 1.16
 8 0 3 0.12 0.62
 -8 0 -3 -0.5 1.66
 8 0 4 1.08 0.59
 -8 0 -4 1.58 1.22
 8 0 5 0.5 0.87
 -8 0 -5 -0.34 1.2
 8 0 6 22.87 1.19
 -8 0 -6 22 1.79
 -8 0 -7 3.35 2.08
 -8 0 -8 51.55 2.56
 -8 0 -9 1.3 1.49
 -8 0 -10 3.77 1.56
 -8 0 -11 1.41 1.57
 -8 0 -12 5.82 1.79
 8 0 13 -1.8 0.64
 -8 0 -13 -1.64 1.74
 8 0 14 3.61 1.08
 -8 0 -14 3.05 1.87
 8 0 15 -0.94 1.08
 -8 0 -15 1.09 1.89
 8 0 16 -0.29 1.12
 -8 0 -16 2.88 1.96
 -8 0 -17 3 2.1
 -8 0 -18 13.78 2.65
 -8 0 -19 4.17 2.33
 -8 0 -20 14.44 2.82
 -8 0 -21 -1.27 2.45
 -8 0 -22 5.48 2.72
 -8 0 -23 -1.04 2.59
 -8 0 -24 4.4 2.77
 -8 0 -25 1.6 2.73
 -8 0 -26 0.83 4.21
 -8 0 -27 8.41 4.98
 -8 0 -28 4.56 3.12
 -8 0 -29 2.1 3.07
 -8 0 -30 -0.39 3.06
 8 -1 -35 1.78 3.95
 8 -1 -34 -1.53 3.73
 8 -1 -33 5.86 3.85
 8 -1 -32 3.95 3.68
 8 -1 -31 -0.12 3.24
 8 -1 -30 5.07 3.46
 8 -1 -29 -3.29 3.32
 8 -1 -28 7.28 5.25
 8 -1 -27 0.29 3.1
 -8 1 27 3.17 2.03
 8 -1 -26 8.42 2.95
 -8 1 26 0.4 2.14
 8 1 -25 5.43 2.92
 8 -1 -25 -0.06 2.86
 -8 1 25 5.61 3.23
 8 1 -24 2.79 2.67
 8 -1 -24 -1.37 2.59
 -8 1 24 3.93 2.01
 8 -1 -23 -1.03 2.41
 8 1 -23 -1.2 2.48
 -8 1 23 1.4 1.9
 8 1 -22 4.62 2.41
 8 -1 -22 0.81 2.38
 -8 -1 22 0.78 0.56
 -8 1 22 2.74 2.9
 8 1 -21 -0.17 2.25
 8 -1 -21 4.69 3.28
 -8 -1 21 0.02 0.64
 -8 1 21 0.63 1.79
 8 1 -20 15.76 2.53
 8 1 -20 9.1 0.99
 8 -1 -20 13.43 2.35
 -8 1 20 11.1 2.01
 -8 -1 20 13.17 1.29
 8 1 -19 40.96 4.71
 8 -1 -19 39.17 3.26
 -8 -1 19 38.55 1.33
 -8 1 19 46.55 2.79
 8 1 -18 5.59 2.01
 8 -1 -18 6.99 2.98
 8 1 -18 5.08 0.9
 -8 -1 18 1.9 1.21
 -8 1 18 3.25 2.77
 8 1 -17 11.15 1.06
 8 1 -17 12.98 2.19
 8 -1 -17 15.06 2.11
 -8 -1 17 14.33 0.96
 -8 1 17 13.76 1.92
 8 1 -16 3.96 0.63
 8 1 -16 1.92 1.71
 8 -1 -16 3.64 1.74
 -8 1 16 0.56 1.56
 -8 -1 16 1.47 0.79
 8 1 -15 -3.78 1.57
 8 -1 -15 -2.28 1.64
 8 1 -15 1.09 0.93
 -8 -1 15 1.26 1.13
 -8 1 15 0.25 1.42
 8 1 -14 0.7 0.91
 8 1 -14 1.34 2.39
 8 -1 -14 1.83 1.59
 -8 -1 14 1.53 0.78
 -8 1 14 -3.02 2.22
 8 1 -13 1.1 0.64
 8 1 -13 0.88 1.43
 8 -1 -13 3.21 1.46
 -8 -1 13 -0.66 0.75
 -8 1 13 2.8 2.13
 8 1 -12 -0.66 0.98
 8 1 -12 0.33 1.31
 8 -1 -12 3.2 1.43
 -8 1 12 -0.65 1.33
 -8 -1 12 2.92 1.12
 8 1 -11 5.14 1.35
 8 -1 -11 9.5 1.49
 8 1 -11 6.65 0.79
 -8 -1 11 6.2 0.79
 -8 1 11 7.35 1.44
 8 1 -10 -0.71 0.71
 8 1 -10 0.65 1.12
 8 -1 -10 -1.34 1.98
 -8 -1 10 0.68 0.73
 -8 1 10 1.24 1.21
 8 1 -9 4.78 1.24
 8 1 -9 5.28 1.17
 8 -1 -9 2.1 1.4
 -8 -1 9 4.95 1.23
 -8 1 9 4.88 1.97
 8 1 -8 2.77 0.8
 8 1 -8 4.62 1.57
 8 -1 -8 -0.64 1.79
 -8 1 8 1.14 1.2
 -8 -1 8 1.21 1.12
 8 1 -7 253.1 8.53
 8 -1 -7 253.97 7.8
 8 1 -7 250.75 6.56
 -8 -1 7 254.81 7.53
 -8 1 7 245.3 7.73
 8 1 -6 6.85 1.55
 8 -1 -6 8.71 1.86
 8 1 -6 9.23 0.99
 -8 -1 6 11.18 1.34
 -8 1 6 9.75 1.24
 8 1 -5 110.59 3.1
 8 1 -5 111.27 2.8
 8 -1 -5 106.36 3.35
 -8 -1 5 113.25 2.72
 -8 1 5 108.86 4.52
 -8 -1 5 101.71 3.06
 8 1 -4 21.26 1.05
 8 1 -4 16.44 1.32
 8 -1 -4 21.52 2.09
 -8 1 4 20.17 1.45
 -8 -1 4 21.25 1.7
 -8 -1 4 20.5 1.19
 8 1 -3 3.37 1.64
 8 1 -3 3.7 0.75
 8 -1 -3 5.46 1.04
 -8 -1 3 4.98 0.9
 -8 1 3 1.5 1.18
 -8 -1 3 3.14 0.84
 8 1 -2 -1.22 0.65
 8 -1 -2 1.26 0.91
 -8 -1 2 2.38 0.87
 -8 1 2 0.02 1.65
 -8 -1 2 -2.89 1.12
 8 1 -1 10.32 1.04
 8 -1 -1 7.61 1.02
 -8 -1 1 7.82 0.76
 -8 -1 1 5.63 1.08
 -8 1 1 10.65 1.24
 8 1 0 11.66 0.98
 8 -1 0 9.52 1.09
 -8 1 0 17.96 1.93
 -8 -1 0 12.53 0.79
 -8 -1 0 12.77 1.22
 8 1 1 18.22 0.98
 8 -1 1 22.45 1.8
 -8 -1 -1 18.93 1.16
 -8 1 -1 20.15 1.39
 8 1 2 17.44 0.84
 8 -1 2 19.32 1.21
 -8 -1 -2 16.67 0.7
 -8 -1 -2 12.31 1.38
 -8 1 -2 16.66 2.25
 8 1 3 21.27 0.79
 -8 -1 -3 22.99 1.62
 -8 1 -3 18.02 1.68
 8 1 4 5.41 0.34
 -8 -1 -4 6.06 1.31
 -8 1 -4 4.96 1.39
 8 1 5 1.59 0.35
 -8 -1 -5 3.42 2.06
 -8 1 -5 3.67 1.97
 -8 -1 -6 5.89 1.4
 -8 1 -6 3.34 1.36
 -8 1 -7 33.5 2.07
 -8 -1 -7 30.17 2.24
 -8 -1 -8 5.45 1.7
 -8 1 -8 6.79 1.58
 -8 -1 -9 3.18 1.59
 -8 1 -9 2.6 2.37
 -8 1 -10 1.37 1.59
 -8 -1 -10 3.1 1.66
 -8 -1 -11 2 1.7
 -8 1 -11 -1.22 1.6
 -8 -1 -12 -0.28 1.9
 -8 1 -12 7.39 1.73
 -8 -1 -13 7.8 2.02
 -8 1 -13 2.44 1.89
 -8 1 -14 -3.15 1.81
 -8 -1 -14 3.44 1.98
 -8 -1 -15 -2.26 2.01
 -8 1 -15 -0.51 1.9
 8 1 16 0.31 0.36
 -8 -1 -16 -1.02 2.15
 -8 1 -16 3.93 1.99
 -8 -1 -17 0.31 2.28
 -8 1 -17 1.86 2.06
 -8 1 -18 6.02 2.37
 -8 -1 -18 4.44 2.54
 -8 -1 -19 6.17 2.55
 -8 1 -19 -2.28 2.29
 -8 -1 -20 3.15 2.72
 -8 1 -20 5.99 2.48
 -8 -1 -21 0.7 2.76
 -8 1 -21 1.88 2.51
 -8 1 -22 1.81 2.49
 -8 -1 -22 0.72 4.41
 -8 -1 -23 -3.93 4.51
 -8 1 -23 1.76 2.61
 -8 -1 -24 -2.56 3.04
 -8 1 -24 4.25 2.61
 -8 -1 -25 -0.79 3.16
 -8 1 -25 4.69 2.72
 -8 -1 -26 6.72 3.34
 -8 1 -26 -0.82 2.8
 -8 -1 -27 0.22 3.3
 -8 1 -27 -1.95 2.73
 -8 -1 -28 2.89 3.37
 -8 1 -28 0.62 2.83
 -8 -1 -29 0.09 5.42
 -8 1 -29 3.96 4.64
 -8 -1 -30 -3.65 5.12
 -8 1 -30 3.68 4.28
 8 -2 -34 -2.58 3.8
 8 -2 -33 -7.27 4
 8 -2 -32 7.35 5.89
 8 -2 -31 2.42 3.46
 8 -2 -30 4.67 3.48
 8 -2 -29 7.97 4.9
 -8 2 29 -1.1 2.57
 8 -2 -28 -4.42 3.13
 -8 2 28 -0.57 2.79
 8 -2 -27 2.91 3.12
 -8 2 27 5.08 4.17
 8 -2 -26 -1.22 2.88
 -8 2 26 -2.04 2.58
 8 -2 -25 13.35 3.28
 -8 2 25 11.18 4.57
 8 -2 -24 1.21 2.62
 -8 2 24 -1.05 2.45
 8 -2 -23 2.38 2.56
 -8 2 23 2.34 3.82
 8 -2 -22 7.17 2.58
 -8 2 22 6.49 2.52
 8 -2 -21 7.11 2.36
 -8 2 21 5.08 2.37
 8 -2 -20 31.71 5.02
 -8 2 20 40.29 3.36
 8 -2 -19 8.92 2.43
 -8 2 19 16.39 2.53
 8 -2 -18 32.54 3.03
 -8 2 18 32.94 4.77
 8 -2 -17 0.87 1.95
 -8 2 17 2.68 2.11
 8 -2 -16 5.01 2
 -8 2 16 9.86 2.08
 8 -2 -15 14.79 3.04
 -8 2 15 8.01 2.11
 8 -2 -14 2.87 1.81
 -8 -2 14 1 0.75
 -8 -2 14 1.06 0.37
 -8 2 14 0.22 1.8
 8 -2 -13 6.4 1.83
 -8 -2 13 7.26 0.73
 -8 -2 13 7.96 0.62
 -8 2 13 8.17 2.88
 8 -2 -12 -1.7 1.58
 -8 -2 12 -0.63 0.54
 -8 2 12 3.85 1.68
 -8 -2 12 0.38 0.48
 8 -2 -11 2.22 1.57
 -8 -2 11 0.77 0.56
 -8 -2 11 -0.13 0.54
 -8 2 11 -0.37 1.58
 8 -2 -10 10.64 1.75
 -8 -2 10 10.54 1.09
 -8 -2 10 8.54 0.71
 -8 2 10 10 2.74
 8 -2 -9 1.66 1.5
 -8 -2 9 2.95 0.67
 -8 -2 9 2.1 0.65
 -8 2 9 0.68 1.61
 8 -2 -8 1.42 1.44
 -8 -2 8 0.21 0.69
 -8 2 8 3.64 1.48
 -8 -2 8 -0.93 0.71
 8 -2 -7 5.37 1.51
 -8 -2 7 6.98 0.8
 -8 -2 7 4.92 0.82
 -8 2 7 7.7 1.62
 8 -2 -6 8.75 1.48
 -8 -2 6 7.25 0.89
 -8 2 6 8.98 1.55
 -8 -2 6 7.1 0.93
 8 -2 -5 -0.05 1.29
 -8 -2 5 1.08 0.84
 -8 2 5 -0.95 2.16
 8 -2 -4 3.26 1.29
 -8 -2 4 1.66 0.88
 -8 -2 4 1.43 0.93
 -8 -2 4 -0.14 0.89
 -8 2 4 2.64 1.46
 8 -2 -3 10.85 1.43
 -8 -2 3 5.95 0.89
 -8 -2 3 12.96 1.55
 -8 2 3 4.55 2.2
 8 -2 -2 3.17 1.47
 -8 -2 2 4.4 1.16
 -8 -2 2 5.08 1.03
 -8 2 2 2.15 1.41
 8 -2 -1 13.16 2.62
 -8 -2 1 16.1 0.89
 -8 -2 1 16.31 1.34
 -8 2 1 15.81 2.64
 -8 -2 0 0.63 1.15
 -8 -2 0 -0.72 0.91
 -8 2 0 1.94 1.4
 -8 -2 -1 1.62 0.55
 -8 -2 -1 0.27 1.22
 -8 2 -1 1.23 2.09
 -8 -2 -2 7.29 0.56
 -8 -2 -2 7.3 1.45
 -8 2 -2 8.48 1.53
 -8 -2 -3 1.14 0.64
 -8 -2 -3 0.32 1.36
 -8 2 -3 -1.73 1.36
 -8 2 -4 5.6 1.54
 -8 -2 -4 6.47 1.54
 -8 -2 -5 6.2 2.44
 -8 2 -5 4.59 1.53
 -8 -2 -6 17.61 2.84
 -8 2 -6 13.07 1.74
 -8 -2 -7 0.71 1.71
 -8 2 -7 6.23 2.27
 -8 -2 -8 -0.05 1.65
 -8 2 -8 -0.78 1.5
 -8 -2 -9 -0.27 1.8
 -8 2 -9 4.11 1.54
 -8 -2 -10 15.4 2.24
 -8 2 -10 9 1.86
 -8 -2 -11 2.23 1.85
 -8 2 -11 -3.02 2.55
 -8 2 -12 0.87 1.8
 -8 -2 -12 -0.97 2
 -8 -2 -13 0.53 2.14
 -8 2 -13 2.34 1.88
 -8 -2 -14 7.91 3.53
 -8 2 -14 4.55 2.04
 -8 -2 -15 -4.29 3.51
 -8 2 -15 1.27 1.96
 -8 2 -16 3.14 2.17
 -8 -2 -16 3.99 3.83
 -8 -2 -17 4.16 2.66
 -8 2 -17 2.82 2.26
 -8 -2 -18 6.16 2.95
 -8 2 -18 7.26 2.38
 -8 -2 -19 -3.38 2.89
 -8 2 -19 1.42 2.33
 -8 2 -20 8.28 2.71
 -8 -2 -20 12.74 3.45
 -8 -2 -21 8.64 3.44
 -8 2 -21 6.91 2.67
 -8 -2 -22 0.08 3.29
 -8 2 -22 -4.99 2.58
 -8 -2 -23 0.8 3.25
 -8 2 -23 0.12 2.47
 -8 -2 -24 -0.16 5.2
 -8 2 -24 -2.17 2.5
 -8 -2 -25 3.29 5.41
 -8 2 -25 5.48 2.74
 -8 -2 -26 8.24 3.53
 -8 2 -26 0.99 2.76
 -8 -2 -27 5.58 3.47
 -8 2 -27 1.03 2.76
 -8 2 -28 4.92 2.85
 -8 -2 -28 1.32 3.68
 -8 -2 -29 1.29 3.73
 -8 -2 -30 1.83 6.17
 8 -3 -33 0.91 3.73
 8 -3 -32 3.91 5.77
 8 -3 -31 2.66 3.42
 -8 3 31 -0.89 3.2
 8 -3 -30 -3.13 3.4
 -8 3 30 12.83 5.03
 -8 3 30 5.85 5.4
 8 -3 -29 1.22 4.99
 -8 3 29 2.19 3.24
 8 -3 -28 -1.44 3.08
 -8 3 28 4.7 4.84
 8 -3 -27 -0.72 3.07
 -8 3 27 2.26 3.1
 8 -3 -26 6.51 4.81
 -8 3 26 3.53 3.18
 8 -3 -25 4.11 3.01
 -8 3 25 5.65 3.16
 8 -3 -24 5.79 3.04
 -8 3 24 7.91 3.1
 8 -3 -23 3.71 2.74
 -8 3 23 2.65 3.05
 8 -3 -22 7.51 2.75
 -8 3 22 7.93 3.16
 8 -3 -21 16.07 4.56
 -8 3 21 19.51 3.4
 8 -3 -20 24.1 3.34
 -8 3 20 26.25 3.62
 8 -3 -19 27.44 3.32
 -8 3 19 34.77 3.91
 8 -3 -18 -0.67 2.27
 -8 3 18 5 2.62
 8 -3 -17 -2.41 2.24
 -8 3 17 0.46 2.54
 8 -3 -16 -5.89 3.19
 -8 3 16 4.54 2.4
 8 -3 -15 5.7 2.11
 -8 3 15 0.67 2.27
 8 -3 -14 4.36 2.04
 -8 3 14 1.49 2.35
 8 -3 -13 0.17 1.95
 -8 -3 13 2.06 0.79
 -8 3 13 3.48 2.18
 -8 -3 13 1.68 0.43
 8 -3 -12 3.04 1.9
 -8 -3 12 0.54 0.8
 -8 -3 12 0.39 0.66
 -8 3 12 0.57 2.12
 8 -3 -11 5.01 1.81
 -8 -3 11 0.08 0.63
 -8 3 11 1.93 2.02
 -8 -3 11 0.69 0.73
 8 -3 -10 8.5 2.1
 -8 -3 10 6.31 1.46
 -8 -3 10 13.95 1.19
 -8 3 10 9.85 2.31
 8 -3 -9 6.26 1.76
 -8 -3 9 3.67 0.92
 -8 -3 9 3.47 1.19
 -8 3 9 4.05 1.96
 8 -3 -8 2.12 1.75
 -8 -3 8 1.57 1.29
 -8 -3 8 4.85 1.45
 -8 3 8 2.85 2.04
 8 -3 -7 57.28 3.17
 -8 -3 7 46.25 1.88
 -8 3 7 51.28 3.34
 -8 -3 7 45.67 1.68
 8 -3 -6 29.54 2.53
 -8 -3 6 30.04 2.12
 -8 -3 6 26.68 1.55
 -8 3 6 27.59 2.68
 8 -3 -5 11.9 2.14
 -8 3 5 14.95 2.14
 -8 -3 5 8.81 1.2
 8 -3 -4 19.43 2.5
 -8 -3 4 17.25 2.12
 -8 3 4 18.71 2.38
 -8 -3 3 11.8 1.34
 -8 3 3 12.18 3.04
 -8 -3 2 15.67 1.48
 -8 -3 2 11.96 1.74
 -8 3 2 19.72 2.15
 -8 -3 1 18.66 1.65
 -8 -3 1 23.06 2.42
 -8 3 1 17.54 3.27
 -8 -3 0 4.71 2.24
 -8 -3 0 3.25 1.23
 -8 3 0 3.69 1.75
 -8 -3 -1 0.05 0.68
 -8 -3 -1 1.68 1.48
 -8 3 -1 -0.32 1.68
 -8 -3 -2 58.72 2.92
 -8 3 -2 46.31 2.96
 -8 -3 -3 2.82 0.82
 -8 -3 -3 -0.16 1.68
 -8 3 -3 0.84 1.67
 -8 -3 -4 -1.9 1.65
 -8 -3 -4 0.89 0.43
 -8 3 -4 0.95 1.68
 -8 -3 -5 8.06 1.91
 -8 -3 -5 3.9 0.38
 -8 3 -5 4.66 1.76
 -8 -3 -6 32.69 2.78
 -8 -3 -6 29.74 0.67
 -8 3 -6 31.13 2.53
 -8 -3 -7 5.34 2.08
 -8 3 -7 6.67 1.92
 -8 -3 -8 3.64 2.14
 -8 3 -8 0.8 2.86
 -8 -3 -9 -0.31 2.11
 -8 3 -9 0.26 1.86
 -8 -3 -10 -0.74 2.31
 -8 3 -10 3.7 1.95
 -8 -3 -11 6.09 2.63
 -8 3 -11 7.1 2.18
 -8 -3 -12 7.66 2.69
 -8 3 -12 6.05 2.15
 -8 -3 -13 7.83 2.81
 -8 3 -13 6.33 3.38
 -8 -3 -14 2.77 2.84
 -8 3 -14 4.71 2.21
 -8 -3 -15 -2.66 2.81
 -8 3 -15 2.2 2.11
 -8 -3 -16 6.42 4.84
 -8 3 -16 5.98 2.44
 -8 -3 -17 7.03 4.62
 -8 3 -17 6.29 2.45
 -8 -3 -18 2.27 2.96
 -8 3 -18 1.95 2.43
 -8 -3 -19 -0.13 2.97
 -8 3 -19 -0.01 2.36
 -8 -3 -20 1.94 3.21
 -8 3 -20 1.94 2.42
 -8 -3 -21 -0.19 3.17
 -8 3 -21 0.82 2.46
 -8 -3 -22 6.25 3.39
 -8 3 -22 2.07 2.52
 -8 -3 -23 -0.97 3.4
 -8 3 -23 3.31 2.54
 -8 -3 -24 5.46 5.55
 -8 3 -24 1.76 2.59
 -8 -3 -25 1.82 3.73
 -8 3 -25 1 2.58
 -8 -3 -26 -0.63 3.75
 -8 3 -26 1.52 2.61
 -8 -3 -27 4.63 4.07
 -8 -3 -28 -1.51 4
 -8 -3 -29 5.18 4.44
 8 -4 -32 7.19 3.89
 -8 4 32 0.13 3.96
 8 -4 -31 0.07 3.69
 -8 4 31 4.44 5.77
 8 -4 -30 -1.38 3.38
 -8 4 30 2.45 3.84
 8 -4 -29 3.43 5.74
 -8 4 29 8.23 3.97
 8 -4 -28 6.24 3.37
 -8 4 28 1.65 3.76
 8 -4 -27 3.31 3.24
 -8 4 27 0.51 3.63
 8 -4 -26 1.2 5.09
 -8 4 26 6.81 5.78
 8 -4 -25 2.73 3.05
 -8 4 25 2.02 3.6
 8 -4 -24 0.63 2.85
 -8 4 24 -5.13 3.45
 8 -4 -23 5.06 3.16
 -8 4 23 3.99 3.6
 8 -4 -22 5.96 3.1
 -8 4 22 4.35 3.49
 8 -4 -21 8.73 4.43
 -8 4 21 -4.96 5.22
 8 -4 -20 0.24 2.74
 -8 4 20 1.42 3.08
 8 -4 -19 7.65 2.99
 -8 4 19 3.05 5.04
 8 -4 -18 -3.72 2.58
 -8 4 18 3.35 3.11
 8 -4 -17 -1.75 2.51
 -8 4 17 0.81 2.93
 8 -4 -16 4.5 4
 -8 4 16 2.6 3.16
 8 -4 -15 -5.57 2.43
 -8 4 15 1.31 2.89
 8 -4 -14 6.25 3.54
 -8 -4 14 0.81 0.63
 -8 4 14 -2.16 4.11
 -8 -4 14 -0.08 0.49
 8 -4 -13 7.72 2.44
 -8 -4 13 0.68 0.7
 -8 -4 13 0.98 0.5
 -8 4 13 0.11 2.72
 8 -4 -12 -4.47 2.37
 -8 -4 12 2.05 1.32
 -8 4 12 -1.69 2.61
 8 -4 -11 3.35 2.27
 -8 -4 11 0.83 1.24
 -8 -4 11 2.22 1.55
 -8 4 11 0.48 2.46
 8 -4 -10 3.19 2.28
 -8 -4 10 1.88 1.45
 -8 -4 10 -0.54 1.74
 -8 4 10 2.23 2.43
 8 -4 -9 10.78 2.51
 -8 -4 9 4.79 1.13
 -8 -4 9 5.88 2.09
 -8 4 9 3.86 2.51
 8 -4 -8 7.03 2.47
 -8 -4 8 2.69 1.38
 -8 -4 8 2.96 1.09
 -8 4 8 3.48 2.56
 8 -4 -7 2.94 2.61
 -8 -4 7 2.45 1.8
 -8 4 7 8.54 3.66
 8 -4 -6 2.72 2.56
 -8 -4 6 -2.14 1.33
 -8 4 6 0.52 2.29
 -8 -4 5 0.79 1.41
 -8 4 5 3.87 2.35
 -8 -4 4 17.3 1.8
 -8 4 4 12.15 4.17
 -8 -4 3 2.49 2.28
 -8 4 3 2.4 2.25
 -8 -4 2 7.91 1.72
 -8 4 2 10.56 2.44
 -8 -4 1 3.02 1.62
 -8 4 1 4.33 2.2
 -8 -4 0 6.11 1.77
 -8 4 0 6.28 2.27
 -8 -4 -1 9.45 1.92
 -8 -4 -1 8.04 1.15
 -8 4 -1 10.92 2.39
 -8 -4 -2 1.12 1.76
 -8 -4 -2 -0.33 0.86
 -8 4 -2 0.08 2.01
 -8 -4 -3 0.19 0.82
 -8 -4 -3 -0.31 1.82
 -8 4 -3 2.18 2.12
 -8 -4 -4 4.42 2.06
 -8 -4 -4 4.94 1.22
 -8 4 -4 0.95 2.22
 -8 -4 -5 0.33 2.05
 -8 -4 -5 -0.9 1.03
 -8 4 -5 -1.13 3.23
 -8 -4 -6 -0.07 2.17
 -8 4 -6 0.79 2.16
 -8 -4 -6 1.31 0.86
 -8 -4 -7 -0.12 0.47
 -8 -4 -7 1.62 2.16
 -8 4 -7 0.01 2.18
 -8 -4 -8 -0.39 0.55
 -8 -4 -8 1.28 2.27
 -8 4 -8 -4.12 2.23
 -8 -4 -8 0.24 0.5
 -8 -4 -9 0.5 0.46
 -8 -4 -9 0.67 0.38
 -8 4 -9 5.4 3.3
 -8 -4 -9 -1.08 2.39
 -8 -4 -10 4.89 2.52
 -8 4 -10 0.14 2.32
 -8 -4 -11 -2.48 2.59
 -8 4 -11 1.41 2.28
 -8 -4 -12 0.5 2.85
 -8 4 -12 3.2 2.34
 -8 -4 -13 21.26 3.57
 -8 4 -13 14.65 3.07
 -8 -4 -14 5.68 3.19
 -8 4 -14 5.51 4.14
 -8 -4 -15 2.9 4.56
 -8 4 -15 -2.14 3.57
 -8 -4 -16 -1.63 5.1
 -8 4 -16 2.72 2.56
 -8 4 -17 5.63 2.78
 -8 -4 -17 9.24 3.67
 -8 -4 -18 2.34 3.54
 -8 4 -18 1.17 2.6
 -8 -4 -19 3.38 3.81
 -8 4 -19 4.83 2.72
 -8 -4 -20 -8.3 3.85
 -8 4 -20 -2.44 2.71
 -8 4 -21 2.66 2.7
 -8 -4 -21 3.35 3.83
 -8 -4 -22 5.4 3.94
 -8 4 -22 0.43 2.72
 -8 -4 -23 -0.18 5.52
 -8 4 -23 -1.22 2.63
 -8 -4 -24 1.81 3.78
 -8 4 -24 3.57 2.8
 -8 -4 -25 5.61 3.99
 -8 -4 -26 6.05 4.11
 -8 -4 -27 -1.69 4.16
 8 -5 -30 9.89 4.07
 -8 5 30 9.15 4.87
 8 -5 -29 1.25 3.48
 -8 5 29 -1.57 4.1
 8 -5 -28 7.95 5.59
 -8 5 28 2.21 4.32
 8 -5 -27 -0.82 3.31
 -8 5 27 0.12 3.98
 8 -5 -26 3.13 3.33
 -8 5 26 3.78 6.28
 8 -5 -25 1.65 3.48
 -8 5 25 8.89 4.01
 8 -5 -24 -1.31 3.44
 -8 5 24 12.55 4.07
 8 -5 -23 -2.3 5.08
 -8 5 23 0.06 5.96
 8 -5 -22 2.29 3.31
 -8 5 22 3.61 3.83
 8 -5 -21 8.82 3.3
 -8 5 21 2.5 3.89
 8 -5 -20 -6.51 3.05
 -8 5 20 9.96 3.67
 8 -5 -19 -0.45 3.01
 -8 5 19 1.29 3.64
 8 -5 -18 9.54 5.26
 -8 5 18 8.67 6.1
 8 -5 -17 -0.12 2.98
 -8 5 17 -2.27 3.55
 8 -5 -16 3.27 2.99
 -8 5 16 3.43 3.57
 8 -5 -15 -0.21 3.05
 -8 5 15 5.01 5.41
 8 -5 -14 9.88 3.22
 -8 5 14 0.32 3.72
 8 -5 -13 9 3.26
 -8 -5 13 7.52 0.89
 -8 5 13 9.7 3.63
 8 -5 -12 5.24 2.92
 -8 -5 12 1.89 0.97
 -8 5 12 -4.35 4.98
 8 -5 -11 0.29 4.74
 -8 -5 11 3.45 1.14
 -8 5 11 5.95 3.18
 8 -5 -10 8.55 3.04
 -8 -5 10 1.25 2.1
 -8 5 10 -2.65 3.17
 8 -5 -9 -4.18 3.13
 -8 -5 9 -0.93 1.44
 -8 5 9 -2.17 4.77
 8 -5 -8 2.03 3.41
 -8 5 8 5.3 3.12
 -8 -5 8 5.47 2.44
 8 -5 -7 1.83 3.28
 -8 -5 7 4.48 1.65
 -8 5 7 5.85 2.92
 -8 -5 6 -0.84 1.61
 -8 5 6 -4.05 2.97
 -8 -5 5 3.92 1.75
 -8 5 5 0.47 2.9
 -8 5 4 0.01 2.79
 8 5 -3 -0.99 1.6
 -8 5 3 -1.31 4.09
 8 5 -2 3.11 1.65
 -8 5 2 -3.71 2.7
 8 5 -1 6.06 1.84
 -8 5 1 7.92 2.94
 8 5 0 1.79 1.75
 -8 5 0 -2.34 4.07
 8 5 1 0.51 1.76
 -8 5 -1 -1.06 2.65
 8 5 2 0.39 1.87
 -8 5 -2 -1.86 2.63
 8 5 3 11.51 2.24
 -8 5 -3 10.76 3.13
 8 5 4 0.99 2.05
 -8 5 -4 -0.55 4
 8 5 5 2.11 2.06
 -8 5 -5 -1.45 2.6
 8 5 6 2.79 2.13
 -8 5 -6 -0.77 2.76
 8 5 7 1.36 2.3
 -8 5 -7 1.15 2.81
 8 5 8 8.92 2.6
 -8 5 -8 6.23 4.75
 8 5 9 4.89 2.52
 -8 -5 -9 5.26 0.97
 -8 5 -9 2 2.92
 8 5 10 0.97 2.51
 -8 5 -10 3.55 2.83
 8 5 11 0.23 2.66
 -8 5 -11 4.52 2.96
 -8 5 -12 8.43 3.24
 -8 5 -13 3.66 3.25
 -8 -5 -13 9.6 3.49
 -8 -5 -14 0.13 3.32
 -8 5 -14 0.28 4.59
 -8 -5 -15 3.38 3.53
 -8 5 -15 1.9 4.58
 -8 -5 -16 -1.6 3.54
 -8 5 -16 2.02 2.97
 -8 5 -17 -0.03 2.87
 -8 -5 -17 2.01 3.51
 -8 -5 -18 3.07 3.7
 -8 5 -18 0.7 3.01
 -8 -5 -19 -3.17 3.61
 -8 5 -19 2.58 2.92
 -8 -5 -20 -4.62 5.99
 -8 5 -20 5.12 2.97
 -8 -5 -21 7.12 4.31
 -8 5 -21 5.65 3.11
 -8 -5 -22 -0.24 4.07
 -8 -5 -23 2.51 4.27
 -8 -5 -24 5.29 4.6
 -8 -5 -25 -5.19 4.66
 8 -6 -27 0.94 6.04
 -8 6 27 2.65 4.62
 8 -6 -26 0.46 4
 -8 6 26 10.14 4.68
 8 -6 -25 3.19 3.79
 -8 6 25 4.43 4.54
 8 -6 -24 0.8 3.63
 -8 6 24 -2.38 4.3
 8 -6 -23 3.89 3.52
 -8 6 23 -0.96 4.21
 8 -6 -22 -8.93 5.83
 -8 6 22 -3.08 6.99
 8 -6 -21 2.56 3.43
 -8 6 21 0.5 4.13
 8 -6 -20 -0.16 3.47
 -8 6 20 0.91 4.15
 8 -6 -19 9.33 3.75
 -8 6 19 0.19 6.62
 8 -6 -18 1.8 3.63
 -8 6 18 8 4.09
 8 -6 -17 6.09 5.49
 -8 6 17 -2.18 3.92
 8 -6 -16 2.98 3.46
 -8 6 16 -7.67 6.28
 8 -6 -15 0.72 3.65
 -8 6 15 -5.01 4.08
 8 -6 -14 9.48 3.82
 -8 6 14 4.3 4.31
 8 -6 -13 -3.35 3.67
 -8 6 13 -2.96 6.14
 8 -6 -12 -8.13 5.77
 -8 6 12 -0.65 4.05
 8 -6 -11 4.31 3.75
 -8 -6 11 3.02 1.54
 -8 6 11 -1.44 3.94
 8 -6 -10 -6.71 3.71
 -8 -6 10 2.34 1.62
 -8 6 10 5.12 3.76
 8 -6 -9 -1.62 3.82
 -8 -6 9 1.21 1.73
 -8 6 9 3.89 3.56
 8 -6 -8 -6.04 3.8
 -8 6 8 2.7 3.64
 8 6 -7 0.38 1.66
 -8 6 7 4.18 3.5
 8 6 -6 1.37 1.82
 -8 6 6 3.07 5.38
 8 6 -5 1.42 1.85
 -8 6 5 3.64 3.41
 8 6 -4 8.41 2.07
 -8 6 4 5.79 3.73
 8 6 -3 3.46 2.06
 -8 6 3 7.12 3.6
 8 6 -2 -0.57 2.02
 -8 6 2 1.97 4.97
 8 6 -1 1.28 2.04
 -8 6 1 -3.58 3.32
 8 6 0 7.12 2.35
 -8 6 0 5.87 3.66
 8 6 1 4.99 2.24
 -8 6 -1 0.62 3.41
 8 6 2 -0.21 2.3
 -8 6 -2 -8.09 4.93
 8 6 3 3.05 2.42
 -8 6 -3 2.92 3.38
 8 6 4 5.14 2.62
 -8 6 -4 10.35 3.54
 8 6 5 2.18 2.4
 -8 6 -5 -5.58 3.19
 8 6 6 3.85 2.62
 -8 6 -6 4.46 3.49
 8 6 7 8.08 2.89
 -8 6 -7 4.02 5.66
 8 6 8 0.48 2.7
 -8 6 -8 -0.59 3.27
 8 6 9 -0.37 2.75
 -8 6 -9 0.68 3.32
 8 6 10 -2.26 2.92
 -8 6 -10 -4.47 3.55
 8 6 11 -0.4 2.98
 -8 6 -11 -0.24 3.43
 8 6 12 2.65 3.11
 -8 6 -12 2.78 3.45
 8 6 13 5.29 3.43
 -8 6 -13 7.47 5.64
 8 6 14 12.67 3.62
 -8 6 -14 3.72 5.82
 8 6 15 0.08 3.13
 -8 6 -15 -1.25 3.41
 -8 6 -16 -0.03 3.36
 -8 -6 -17 4.28 3.98
 -8 6 -17 2.97 3.61
 -8 -6 -18 -2.27 3.99
 -8 6 -18 -1.41 3.55
 -8 -6 -19 -2.96 3.98
 -8 6 -19 2.3 3.39
 -8 -6 -20 7.3 4.54
 -8 -6 -21 3.41 4.38
 -8 -6 -22 0.81 4.34
 8 -7 -23 -3.68 6.16
 -8 7 23 3.38 4.64
 8 -7 -22 -4.73 4.11
 -8 7 22 -8.31 5.13
 8 -7 -21 4.09 4.02
 -8 7 21 3.99 7.66
 8 -7 -20 -0.7 3.83
 -8 7 20 0.74 4.4
 8 -7 -19 -4.54 3.98
 -8 7 19 1.13 4.66
 8 -7 -18 6.75 6.47
 -8 7 18 4.16 4.66
 8 -7 -17 5.25 4.35
 -8 7 17 5.71 4.62
 8 -7 -16 -2.89 4.06
 -8 7 16 -0.32 4.34
 8 -7 -15 10.1 4.12
 -8 7 15 -2.84 4.43
 8 -7 -14 10.56 4.39
 -8 7 14 -0.64 7.08
 8 -7 -13 20.01 6.79
 -8 7 13 5.85 5.06
 8 -7 -12 2.66 4.33
 -8 7 12 7.53 4.63
 8 -7 -11 13.15 4.39
 -8 7 11 -6.09 4.51
 8 -7 -10 11.79 6.86
 -8 7 10 0.6 7.34
 8 -7 -9 10.52 4.4
 -8 7 9 -6.12 4.49
 8 7 -8 0.26 1.95
 8 -7 -8 -6.22 4.38
 -8 7 8 -0.61 4.28
 8 7 -7 2.72 2.12
 -8 7 7 7.2 4.39
 8 7 -6 -0.25 2.05
 -8 7 6 2.06 6.15
 8 7 -5 9.79 2.52
 -8 7 5 10 4.63
 8 7 -4 0.21 2.22
 -8 7 4 0.86 3.85
 8 7 -3 -1.6 2.34
 -8 7 3 7.21 3.87
 8 7 -2 3.62 3.89
 -8 7 2 8.59 6.4
 8 7 -1 6.1 3.87
 -8 7 1 3.46 4.06
 8 7 0 4.34 4.22
 -8 7 0 11.56 4.29
 8 7 1 4.2 4.45
 -8 7 -1 3.55 4.08
 8 7 2 0.87 4.72
 -8 7 -2 10.21 4.12
 8 7 3 3.84 4.9
 -8 7 -3 12.23 6.69
 8 7 4 0.75 4.57
 -8 7 -4 -0.85 5.82
 8 7 5 4.43 4.49
 -8 7 -5 2.43 4.01
 8 7 6 3.32 4.69
 -8 7 -6 3.6 4.05
 8 7 7 -0.92 2.94
 -8 7 -7 3.09 4
 8 7 8 -0.88 3
 -8 7 -8 4.27 3.99
 8 7 9 -1.11 3.09
 -8 7 -9 4.44 3.93
 8 7 10 3.05 3.2
 -8 7 -10 -3.8 6.08
 8 7 11 3.03 3.16
 -8 7 -11 1.59 6.3
 8 7 12 7.79 3.73
 -8 7 -12 10.17 4.12
 8 7 13 -0.4 3.51
 -8 7 -13 9.52 4.11
 8 7 14 1.92 3.44
 -8 7 -14 -0.02 3.89
 8 7 15 3.91 3.57
 -8 7 -15 2.04 4.05
 8 7 16 0.46 3.6
 -8 7 -16 -2.23 3.95
 8 7 17 0.63 3.71
 8 -8 -17 1.92 4.67
 -8 8 17 5.59 5.03
 8 -8 -16 -0.92 6.82
 -8 8 16 2.24 4.79
 8 -8 -15 -2.47 4.38
 -8 8 15 -1.35 7.54
 8 -8 -14 -4.36 4.33
 -8 8 14 4.73 4.62
 8 -8 -13 8.2 7.47
 -8 8 13 6.15 4.99
 8 -8 -12 -1.79 4.67
 -8 8 12 -3.86 4.65
 8 -8 -11 6.27 4.51
 -8 8 11 -6.11 7.17
 8 -8 -10 4.23 7.26
 -8 8 10 1.6 4.81
 8 -8 -9 2.38 4.84
 -8 8 9 0.17 4.66
 8 -8 -8 0.05 4.89
 -8 8 8 7.98 4.8
 -8 8 7 7.37 4.97
 -8 8 6 2.26 7.11
 8 8 -5 3.02 2.66
 -8 8 5 4.53 4.77
 8 8 -4 0.54 2.61
 -8 8 4 -1.42 4.45
 8 8 -3 12.7 4.34
 -8 8 3 -2.88 4.64
 8 8 -2 -0.47 4.21
 -8 8 2 0.81 4.51
 8 8 -1 5.5 5.02
 -8 8 1 1.24 7.23
 8 8 0 4.23 5.09
 -8 8 0 9.3 4.68
 8 8 1 -5.04 5.04
 -8 8 -1 -2.19 4.48
 8 8 2 10.22 5.45
 -8 8 -2 7.02 4.78
 8 8 3 -4.09 5.02
 -8 8 -3 0.24 4.33
 8 8 4 4.5 5.31
 -8 8 -4 1.58 4.41
 8 8 5 0.18 5.44
 -8 8 -5 -7.12 6.99
 8 8 6 8.15 5.13
 -8 8 -6 -2.6 7.28
 8 8 7 3.81 5.14
 -8 8 -7 3.82 4.54
 8 8 8 0.72 3.34
 -8 8 -8 3.42 4.46
 8 8 9 -5.51 3.55
 -8 8 -9 0.91 4.52
 8 8 10 0.1 3.49
 -8 8 -10 5.27 4.56
 8 8 11 -0.24 3.52
 -8 8 -11 -0.4 4.44
 8 8 12 1.54 3.67
 -8 8 -12 -2.23 4.5
 8 8 13 2.68 3.78
 -8 8 -13 -2.86 4.41
 -8 9 5 2.65 5.28
 -8 9 4 -3.38 5.39
 -8 9 3 -1.02 5.07
 -8 9 2 -3.08 5.31
 8 9 -1 -0.93 3.13
 -8 9 1 6.73 7.78
 8 9 0 1.81 5.08
 -8 9 0 3.18 8.23
 9 0 -32 -1.67 3.64
 9 0 -31 4.78 3.63
 9 0 -30 0.37 3.41
 9 0 -29 3.4 3.38
 9 0 -28 1.3 4.91
 9 0 -27 -5.58 3.25
 9 0 -26 -5.61 3.14
 9 0 -25 4.86 2.89
 -9 0 25 2.24 1.59
 9 0 -24 13.27 3.47
 -9 0 24 21.11 1.87
 9 0 -23 -2.37 2.52
 -9 0 23 2.18 1.46
 9 0 -22 74.75 5.03
 -9 0 22 72.08 4.65
 9 0 -21 -0.65 2.37
 -9 0 21 7.22 2.29
 9 0 -20 24 2.92
 9 0 -20 18.26 1.58
 -9 0 20 30.51 3.06
 9 0 -19 1.22 1.73
 9 0 -19 3.35 2.04
 -9 0 19 2.46 2.26
 9 0 -18 6.63 1.88
 9 0 -18 10.61 2.25
 -9 0 18 8.43 2.37
 9 0 -17 -0.57 1.06
 9 0 -17 2.27 1.9
 -9 0 17 -3.4 2.04
 9 0 -16 14.96 1.37
 9 0 -16 20.64 2.31
 -9 0 16 17.5 2.55
 9 0 -15 -3.03 1.73
 9 0 -15 -2 1.7
 9 0 -14 7.47 1.78
 9 0 -14 5.75 1.22
 -9 0 14 9.12 2.06
 9 0 -13 1.99 1.08
 9 0 -13 -0.85 1.5
 -9 0 13 -3.32 1.83
 9 0 -12 1.16 1.04
 9 0 -12 0.66 2.19
 9 0 -12 0.32 2.22
 -9 0 12 1.79 1.89
 9 0 -11 -0.32 1.28
 9 0 -11 -0.32 1.02
 -9 0 11 4.01 1.75
 9 0 -10 5.05 1.29
 9 0 -10 3.68 1.65
 -9 0 10 3.51 1.18
 9 0 -9 4.11 1.79
 -9 0 9 -0.56 1.06
 9 0 -8 7.78 1.29
 -9 0 8 9.22 1.19
 9 0 -7 -1.27 1.07
 -9 0 7 -0.21 1.05
 9 0 -6 -0.49 1.59
 -9 0 6 3.37 1.56
 9 0 -5 0.32 0.98
 -9 0 5 -1.47 1.06
 9 0 -4 8.05 1.05
 -9 0 4 3.28 1.11
 9 0 -3 4.66 1.4
 -9 0 3 -0.06 1.09
 -9 0 3 -0.87 1.66
 9 0 -2 42.92 1.56
 -9 0 2 43.4 1.94
 -9 0 2 40.89 1.85
 9 0 -1 1.04 0.83
 -9 0 1 0.88 1.14
 9 0 0 7.25 0.88
 -9 0 0 4.84 1.23
 9 0 1 -0.17 0.75
 -9 0 -1 5.04 1.8
 9 0 2 15.93 0.94
 -9 0 -2 16.89 1.62
 9 0 3 -0.74 1.04
 -9 0 -3 1.75 1.32
 9 0 4 15.08 0.93
 -9 0 -4 16.93 2.51
 9 0 5 1.24 1.05
 -9 0 -5 0.8 1.44
 9 0 6 0.52 0.98
 -9 0 -6 1.66 1.42
 9 0 7 -0.93 0.67
 -9 0 -7 2.78 1.54
 9 0 8 2.22 1.03
 -9 0 -8 1.4 1.63
 9 0 9 0.1 0.99
 -9 0 -9 2.16 2.51
 -9 0 -10 31.55 3.57
 -9 0 -11 0.97 1.72
 -9 0 -12 3.1 1.89
 -9 0 -13 0.73 1.83
 9 0 14 24.52 1.44
 -9 0 -14 19.66 2.72
 -9 0 -15 -1.75 2.1
 -9 0 -16 4.04 2.24
 -9 0 -17 0.33 2.24
 -9 0 -18 2.86 2.4
 -9 0 -19 0.96 2.46
 -9 0 -20 2.28 2.49
 -9 0 -21 5.89 2.71
 -9 0 -22 -5.55 4.25
 -9 0 -23 2.15 4.32
 -9 0 -24 1.58 4.41
 -9 0 -25 -0.54 2.86
 -9 0 -26 5.06 3.17
 -9 0 -27 -1.83 3.01
 -9 0 -28 -1.5 3.16
 -9 0 -29 -1.31 3.21
 9 -1 -35 -0.92 3.82
 9 -1 -34 0.39 3.79
 9 -1 -33 -1.71 3.77
 9 -1 -32 1.33 5.51
 9 -1 -31 -0.28 3.33
 9 -1 -30 1 3.29
 9 -1 -29 1.4 5.06
 9 -1 -28 2.84 3.32
 9 -1 -27 4.33 3.13
 -9 1 27 0.52 2.16
 9 1 -26 3.88 3.03
 9 -1 -26 2.18 3.02
 -9 1 26 3.61 2.11
 9 1 -25 -4.52 2.8
 9 -1 -25 0.23 4.28
 -9 1 25 6.34 3.15
 9 1 -24 -7.5 2.73
 9 -1 -24 2.01 2.66
 -9 1 24 -0.19 2.05
 9 1 -23 15.67 3.36
 9 -1 -23 23 3.34
 -9 1 23 21.08 2.68
 9 1 -22 -0.17 2.57
 9 -1 -22 2.76 3.74
 -9 -1 22 1.58 0.76
 -9 1 22 4.99 3.07
 9 1 -21 75.94 7.17
 9 -1 -21 63.19 4.78
 -9 -1 21 66.9 2.67
 -9 1 21 66.39 4.04
 9 1 -20 1.32 3.49
 9 -1 -20 8.01 2.39
 -9 1 20 3.85 2.03
 9 1 -19 3.06 1.03
 9 1 -19 -0.81 2.13
 9 -1 -19 6.75 2.17
 -9 -1 19 1.82 1.4
 -9 1 19 4.99 1.94
 9 1 -18 11.27 1.32
 9 1 -18 14.97 2.33
 9 -1 -18 18.8 2.44
 -9 -1 18 15.79 1.24
 -9 1 18 18.15 3.33
 9 1 -17 0.4 1.07
 9 1 -17 -2.14 1.89
 9 -1 -17 3.32 1.85
 -9 -1 17 -2.87 1.39
 -9 1 17 0.06 1.68
 9 1 -16 3.45 1.87
 9 1 -16 3.14 0.75
 9 -1 -16 2.58 1.88
 -9 -1 16 2.62 1.01
 -9 1 16 5.36 1.67
 9 1 -15 3.49 0.8
 9 1 -15 5.78 2.75
 9 -1 -15 8.41 1.91
 -9 -1 15 6.98 1.02
 -9 1 15 5.15 1.77
 9 1 -14 1.22 1.24
 9 1 -14 4.19 1.72
 9 -1 -14 5.61 1.79
 -9 -1 14 5.22 1.54
 -9 1 14 1.98 2.46
 9 1 -13 2.65 1.31
 9 1 -13 2.9 1.58
 9 -1 -13 6.22 1.56
 -9 -1 13 -0.33 0.94
 -9 1 13 3.76 1.54
 9 1 -12 -0.5 0.86
 9 1 -12 1.91 1.42
 9 -1 -12 2.36 1.55
 -9 -1 12 -0.18 1.42
 -9 1 12 0.02 1.47
 9 1 -11 3.37 0.97
 9 1 -11 5.79 1.38
 9 -1 -11 3.93 1.57
 -9 -1 11 4.14 1.43
 -9 1 11 3.75 1.51
 9 1 -10 3.47 1.4
 9 1 -10 3.29 1.29
 9 -1 -10 2.3 2.32
 -9 -1 10 2.76 1.41
 -9 1 10 1.36 2.2
 9 1 -9 187.8 7.64
 9 1 -9 181.53 5.19
 9 -1 -9 183.76 6.45
 -9 -1 9 194.85 4.87
 -9 1 9 192.22 6.52
 9 1 -8 12.68 1.18
 9 1 -8 15.03 1.37
 9 -1 -8 14.51 1.57
 -9 1 8 11.97 1.57
 -9 -1 8 12.13 1.05
 9 1 -7 92.84 2.85
 9 1 -7 88.34 2.85
 9 -1 -7 83.61 3.21
 -9 -1 7 89.7 3.47
 -9 1 7 90.03 3.19
 9 1 -6 48.66 2.03
 9 1 -6 48.18 1.82
 9 -1 -6 44.5 2.13
 -9 -1 6 43.22 1.73
 -9 1 6 40.86 2.17
 9 1 -5 133.61 3.56
 9 -1 -5 137.17 4.31
 -9 1 5 129.18 4.27
 -9 -1 5 126.46 3.5
 9 -1 -4 5.6 1.16
 9 1 -4 3.94 0.87
 -9 -1 4 -0.7 1.54
 -9 -1 4 1.46 1.05
 -9 1 4 -0.3 1.99
 9 1 -3 36.37 1.34
 9 -1 -3 31.32 1.77
 -9 -1 3 33.94 1.51
 -9 -1 3 31.92 1.65
 -9 1 3 34.46 2.04
 9 1 -2 75.72 2.49
 9 -1 -2 64.91 2.43
 -9 -1 2 66.31 2.33
 -9 1 2 66.36 3.74
 -9 -1 2 72.16 2.89
 9 1 -1 69.89 2.34
 9 -1 -1 72.57 2.37
 -9 -1 1 68.79 2.81
 -9 1 1 68.86 2.68
 -9 -1 1 71.13 2.49
 9 -1 0 0.09 0.99
 9 1 0 -2.65 0.94
 -9 -1 0 0.61 0.74
 -9 -1 0 -0.55 1.7
 -9 1 0 2.28 1.89
 9 -1 1 14.54 1.25
 9 1 1 14.98 1.03
 -9 -1 -1 12.22 1.46
 -9 -1 -1 13.81 1.35
 -9 1 -1 14.79 1.55
 9 1 2 1.5 0.8
 9 -1 2 0.12 1.54
 -9 -1 -2 1.13 1.24
 -9 1 -2 0.68 1.34
 9 1 3 2.22 0.7
 9 -1 3 2.01 1.05
 -9 -1 -3 4.83 2.01
 -9 1 -3 -0.57 1.46
 9 1 4 11.23 0.72
 -9 1 -4 9.21 1.73
 -9 -1 -4 12 1.64
 9 1 5 0.81 0.31
 -9 -1 -5 0.66 1.48
 -9 1 -5 0.71 1.56
 -9 1 -6 12.81 1.85
 -9 -1 -6 18.2 1.89
 -9 -1 -7 4.21 1.63
 -9 1 -7 4.79 1.6
 -9 -1 -8 -2.63 1.73
 -9 1 -8 1.93 1.57
 -9 -1 -9 1.33 1.78
 -9 1 -9 2.35 1.72
 -9 1 -10 8.8 2.74
 -9 -1 -10 -0.66 3.01
 -9 -1 -11 3.22 3.16
 -9 1 -11 6.96 2.93
 -9 1 -12 4.72 1.96
 -9 -1 -12 3.59 3.28
 -9 -1 -13 6.53 3.19
 -9 1 -13 2.61 1.99
 -9 -1 -14 3.15 3.3
 -9 1 -14 -0.8 1.99
 -9 -1 -15 8.41 3.84
 -9 1 -15 4.62 2.31
 -9 -1 -16 0.05 3.73
 -9 1 -16 2.57 2.2
 -9 -1 -17 10.41 3.95
 -9 1 -17 -0.1 2.4
 -9 -1 -18 3.38 2.6
 -9 1 -18 0.97 2.38
 -9 -1 -19 3.73 2.99
 -9 1 -19 7.12 2.6
 -9 1 -20 3.54 2.58
 -9 -1 -20 1.81 2.78
 -9 -1 -21 -3.47 3.11
 -9 1 -21 -1.45 2.71
 -9 1 -22 -0.67 2.63
 -9 -1 -22 0.65 2.95
 -9 -1 -23 2.95 3.21
 -9 1 -23 1.84 2.82
 -9 -1 -24 1.6 3.21
 -9 1 -24 -3.42 2.81
 -9 -1 -25 -0.47 3.14
 -9 1 -25 -0.03 2.8
 -9 -1 -26 6.78 4.94
 -9 1 -26 -1.81 2.81
 -9 -1 -27 9.66 5.58
 -9 1 -27 2.74 5.08
 -9 -1 -28 -4.14 3.46
 -9 1 -28 3.29 4.49
 -9 -1 -29 -3.23 3.53
 -9 1 -29 -1.44 3.05
 9 -2 -34 0.85 3.88
 9 -2 -33 -0.21 3.76
 9 -2 -32 -0.35 3.63
 9 -2 -31 5.35 3.75
 9 -2 -30 6.13 3.61
 9 -2 -29 6.27 5.03
 -9 2 29 -0.59 2.84
 9 -2 -28 5.8 3.31
 -9 2 28 -0.26 4.36
 9 -2 -27 -5.34 3.2
 -9 2 27 2.07 2.71
 9 -2 -26 -5.33 4.74
 -9 2 26 11.94 4.16
 9 -2 -25 2.88 2.81
 -9 2 25 -0.9 2.63
 9 -2 -24 1.67 2.81
 -9 2 24 2.46 2.75
 9 -2 -23 -4.46 3.82
 -9 2 23 1.59 2.5
 9 -2 -22 35.22 3.89
 -9 2 22 40.25 3.81
 9 -2 -21 2.9 2.57
 -9 2 21 8.97 3.82
 9 -2 -20 5.49 3.83
 -9 2 20 5.84 2.46
 9 -2 -19 -1.37 2.26
 -9 2 19 3.05 2.39
 9 -2 -18 8.77 2.25
 -9 2 18 -0.18 2.35
 9 -2 -17 6.87 2.23
 -9 2 17 2.09 2.27
 9 -2 -16 4.95 2.03
 -9 -2 16 2.54 0.84
 -9 -2 16 1.91 0.58
 -9 2 16 7.59 3.22
 9 -2 -15 0.66 3.03
 -9 -2 15 0.81 0.63
 -9 -2 15 0.17 0.46
 -9 2 15 -0.8 2.03
 9 -2 -14 6.16 2.01
 -9 -2 14 2.32 0.53
 -9 -2 14 2.56 1.12
 -9 2 14 -0.21 2.01
 9 2 -13 1.61 1.62
 9 -2 -13 6.18 1.91
 -9 -2 13 1.5 0.72
 -9 -2 13 0.3 0.59
 -9 2 13 3.33 1.92
 9 2 -12 4.63 1.61
 9 -2 -12 2.71 1.92
 -9 2 12 5.31 1.94
 -9 -2 12 6.94 0.82
 9 2 -11 6.58 1.63
 9 -2 -11 9.4 1.9
 -9 -2 11 8.1 1.27
 -9 2 11 4.23 2.96
 9 2 -10 3.5 1.4
 9 -2 -10 2.97 2.51
 -9 -2 10 4.2 1.25
 -9 2 10 3.23 1.8
 9 2 -9 3.71 1.31
 9 -2 -9 -0.33 1.61
 -9 -2 9 3.34 0.84
 -9 2 9 3.4 1.77
 9 2 -8 1.54 1.25
 9 -2 -8 5.45 1.58
 -9 2 8 4.43 1.77
 -9 -2 8 1.82 1.37
 9 2 -7 19.01 1.45
 9 -2 -7 17.03 1.95
 -9 -2 7 18.31 1.73
 -9 2 7 23.9 2.1
 9 2 -6 -3.24 1.08
 9 -2 -6 -2.81 1.48
 -9 -2 6 0.73 0.98
 -9 -2 6 0.74 0.89
 -9 2 6 -4.6 1.61
 9 -2 -5 1.57 1.38
 -9 -2 5 0.74 0.93
 -9 2 5 -4.53 1.55
 9 -2 -4 2.06 1.37
 -9 -2 4 -1.51 0.99
 -9 2 4 1.88 2.4
 9 -2 -3 2.44 1.45
 -9 -2 3 3.74 1.49
 -9 -2 3 1.21 1.13
 -9 2 3 -1.73 1.54
 9 -2 -2 28.19 1.98
 -9 -2 2 23.92 1.58
 -9 -2 2 21.9 1.29
 -9 2 2 25.39 2.17
 9 -2 -1 3.88 1.59
 -9 -2 1 4.37 1.32
 -9 -2 1 4.47 1.92
 -9 2 1 2.03 1.52
 9 -2 0 2.43 1.55
 -9 -2 0 1.56 0.74
 -9 -2 0 4.51 1.28
 -9 2 0 2.82 1.55
 -9 -2 -1 12.71 0.81
 -9 -2 -1 11.19 1.59
 -9 2 -1 13.2 1.89
 -9 -2 -2 3.13 0.61
 -9 -2 -2 2.07 1.41
 -9 2 -2 1.5 1.66
 -9 -2 -3 2.25 2.17
 -9 -2 -3 -0.29 0.75
 -9 2 -3 0.7 1.58
 -9 -2 -4 4.01 0.42
 -9 -2 -4 -0.56 2.49
 -9 2 -4 6.83 1.64
 -9 2 -5 0.52 1.61
 -9 -2 -5 2.34 1.64
 -9 -2 -6 -1.21 1.63
 -9 2 -6 1.23 1.61
 -9 -2 -7 5.74 1.93
 -9 2 -7 0.93 2.65
 -9 -2 -8 7.63 2.13
 -9 2 -8 8 1.88
 -9 -2 -9 1.53 1.98
 -9 2 -9 0.82 1.74
 -9 -2 -10 6.52 2.24
 -9 2 -10 11.13 2.03
 -9 -2 -11 4.23 2.23
 -9 2 -11 0.59 1.87
 -9 -2 -12 6.73 2.42
 -9 2 -12 6.73 3.3
 -9 2 -13 7.97 2.37
 -9 -2 -13 10.8 2.74
 -9 -2 -14 7.69 2.62
 -9 2 -14 2.72 2.18
 -9 -2 -15 -0.6 2.61
 -9 2 -15 1.58 2.16
 -9 -2 -16 3.13 2.8
 -9 2 -16 4.94 2.4
 -9 2 -17 3.28 2.56
 -9 -2 -17 7.41 3.06
 -9 -2 -18 -1.7 3.01
 -9 2 -18 -4.55 2.52
 -9 -2 -19 9.55 4.62
 -9 2 -19 0.92 2.62
 -9 -2 -20 -8.91 4.76
 -9 2 -20 3.36 2.52
 -9 -2 -21 1.68 3.1
 -9 2 -21 0.08 2.67
 -9 -2 -22 3.18 3.31
 -9 2 -22 5.81 2.79
 -9 -2 -23 -3 3.27
 -9 2 -23 -0.01 2.69
 -9 -2 -24 2.8 3.35
 -9 2 -24 0.81 2.75
 -9 -2 -25 4.08 3.52
 -9 2 -25 3.43 2.78
 -9 -2 -26 0.72 3.56
 -9 2 -26 3.5 2.89
 -9 -2 -27 10.18 5.66
 -9 2 -27 1.14 2.98
 -9 -2 -28 5.9 5.97
 -9 2 -28 3.04 3.07
 -9 -2 -29 -1.73 3.97
 9 -3 -33 2.33 3.76
 9 -3 -32 5.9 6.09
 9 -3 -31 -0.72 3.54
 9 -3 -30 2.95 3.46
 -9 3 30 -1.22 3.38
 9 -3 -29 2.62 5.05
 -9 3 29 -2.24 5.12
 9 -3 -28 2.54 3.15
 -9 3 28 -1.77 3.17
 9 -3 -27 -0.51 3.24
 -9 3 27 6.17 4.91
 9 -3 -26 -0.11 3.04
 -9 3 26 2.25 3.12
 9 -3 -25 -1.75 2.91
 -9 3 25 3.16 4.74
 9 -3 -24 9.1 3.25
 -9 3 24 10.08 3.45
 9 -3 -23 -0.19 2.81
 -9 3 23 -3.65 4.53
 9 -3 -22 3.92 2.75
 -9 3 22 1.32 3.11
 9 -3 -21 10.88 4.81
 -9 3 21 22.62 5.29
 9 -3 -20 -4.75 2.63
 -9 3 20 4.2 2.9
 9 -3 -19 5.81 2.55
 -9 3 19 0.76 2.98
 9 -3 -18 8.08 2.62
 -9 3 18 3.59 3.01
 9 -3 -17 2.05 2.47
 -9 3 17 5.4 2.72
 9 -3 -16 9.82 4.09
 -9 3 16 17.36 2.97
 9 -3 -15 12.7 2.48
 -9 3 15 9.2 2.85
 9 -3 -14 4 2.2
 -9 -3 14 1.82 0.52
 -9 -3 14 1.56 0.89
 -9 3 14 3.62 2.44
 9 -3 -13 2.8 2.11
 -9 -3 13 5.43 0.98
 -9 -3 13 1.42 0.71
 -9 3 13 4.85 2.43
 9 -3 -12 -0.59 2.06
 -9 -3 12 0.07 0.69
 -9 3 12 -1.44 2.26
 -9 -3 12 -0.59 0.78
 9 -3 -11 8.07 3.17
 -9 -3 11 6.4 1.3
 -9 -3 11 2.99 1.37
 -9 3 11 1.77 2.37
 9 -3 -10 38.21 2.91
 -9 -3 10 32.51 1.26
 -9 -3 10 33.29 1.47
 -9 3 10 33.66 3.07
 9 -3 -9 8.52 2.07
 -9 -3 9 5.33 1.39
 -9 -3 9 6.23 1.63
 -9 3 9 4.91 2.25
 9 -3 -8 -2.04 1.9
 -9 -3 8 1.37 1.37
 -9 3 8 6.4 2.07
 -9 -3 8 1.8 1.56
 9 -3 -7 8.01 2.01
 -9 -3 7 7.41 1.13
 -9 3 7 9.91 2.23
 9 -3 -6 -2.25 1.95
 -9 -3 6 2.3 1.09
 -9 3 6 1.99 2.05
 9 -3 -5 1.37 1.89
 -9 -3 5 1.54 1.13
 -9 3 5 -1.33 2
 9 -3 -4 6.97 2.26
 -9 3 4 8.49 2.1
 -9 -3 4 5.19 2.05
 9 -3 -3 -2.71 2.06
 -9 -3 3 1.58 1.25
 -9 3 3 -3.01 1.86
 -9 -3 2 41.77 2.21
 -9 -3 2 34.4 1.66
 -9 3 2 42.46 4.22
 -9 -3 1 6.92 0.98
 -9 3 1 7.19 2.12
 -9 -3 1 8.13 2.41
 -9 -3 0 0.31 1.47
 -9 -3 0 2.43 1.25
 -9 3 0 -0.28 1.91
 -9 -3 -1 8.57 0.81
 -9 -3 -1 9.02 1.73
 -9 3 -1 9.17 3.06
 -9 -3 -2 -1.19 0.95
 -9 -3 -2 3.91 1.62
 -9 3 -2 2.29 1.87
 -9 -3 -3 0.18 0.55
 -9 -3 -3 0.55 1.66
 -9 3 -3 3.29 1.76
 -9 -3 -4 9.65 1.95
 -9 -3 -4 6.69 0.53
 -9 3 -4 9.55 3.11
 -9 -3 -5 -1.14 1.79
 -9 3 -5 -1.08 1.89
 -9 -3 -5 -0.26 0.53
 -9 -3 -6 6.25 2.12
 -9 3 -6 12.68 2.15
 -9 -3 -7 0.74 1.95
 -9 3 -7 -1.01 2.93
 -9 -3 -8 6.13 2.23
 -9 3 -8 7.43 2.18
 -9 -3 -9 8.77 2.48
 -9 3 -9 12.04 2.35
 -9 -3 -10 -1.06 2.23
 -9 3 -10 0.84 2.16
 -9 -3 -11 0.39 2.42
 -9 3 -11 6.18 2.27
 -9 -3 -12 2.84 2.5
 -9 3 -12 -1.18 3.44
 -9 -3 -13 -0.02 2.6
 -9 3 -13 2.32 3.38
 -9 -3 -14 4.54 2.73
 -9 3 -14 -0.9 2.35
 -9 -3 -15 9.59 2.91
 -9 3 -15 3.47 2.54
 -9 3 -16 0.2 2.36
 -9 -3 -16 1.77 2.83
 -9 -3 -17 7.87 3.05
 -9 3 -17 0.84 2.63
 -9 -3 -18 12.99 3.53
 -9 3 -18 7.64 2.92
 -9 -3 -19 12.44 3.67
 -9 3 -19 9.79 3.01
 -9 3 -20 -0.4 2.57
 -9 -3 -20 2.33 5.01
 -9 -3 -21 -4.96 5.37
 -9 3 -21 2.91 2.65
 -9 -3 -22 -2.73 3.5
 -9 3 -22 1.05 2.63
 -9 -3 -23 3.42 3.54
 -9 3 -23 -0.25 2.69
 -9 3 -24 3.36 2.79
 -9 -3 -24 -0.24 3.7
 -9 -3 -25 -1.85 3.86
 -9 3 -25 -3.28 2.78
 -9 -3 -26 0.37 3.98
 -9 3 -26 -2.97 2.8
 -9 -3 -27 0.36 6.03
 -9 -3 -28 -4.39 6.51
 9 -4 -31 5.04 3.85
 -9 4 31 2.53 4.14
 9 -4 -30 1.17 3.66
 -9 4 30 12.55 6.26
 9 -4 -29 -0.17 5.13
 -9 4 29 -0.49 3.72
 9 -4 -28 1.92 3.4
 -9 4 28 2.67 3.82
 9 -4 -27 0.48 3.22
 -9 4 27 2.79 5.74
 9 -4 -26 -0.08 5.48
 -9 4 26 13.49 4
 9 -4 -25 0.16 3.18
 -9 4 25 15.87 5.76
 9 -4 -24 -0.6 3.01
 -9 4 24 1.91 3.51
 9 -4 -23 3.3 3.28
 -9 4 23 6.92 3.76
 9 -4 -22 0.3 3.04
 -9 4 22 0.97 3.41
 9 -4 -21 13.72 5.23
 -9 4 21 7.78 3.95
 9 -4 -20 3.11 3.06
 -9 4 20 7.3 5.45
 9 -4 -19 6.33 3.16
 -9 4 19 10.15 3.76
 9 -4 -18 -6.6 2.9
 -9 4 18 0.11 5.28
 9 -4 -17 15.16 3.16
 -9 4 17 10.45 3.66
 9 -4 -16 9.18 4.47
 -9 4 16 10.9 3.62
 9 -4 -15 6.31 2.68
 -9 4 15 2.85 3.08
 9 -4 -14 9.21 2.77
 -9 4 14 2.9 3.17
 9 -4 -13 10.31 2.89
 -9 4 13 9.51 4.8
 9 -4 -12 3.13 2.53
 -9 -4 12 0.09 1.7
 -9 -4 12 0.76 1.15
 -9 -4 12 -1.28 1.57
 -9 4 12 -4.57 2.75
 9 -4 -11 5.01 3.91
 -9 -4 11 3.32 1.38
 -9 -4 11 0.31 1.83
 -9 4 11 1.02 2.76
 9 -4 -10 6.05 2.5
 -9 -4 10 0.69 1.56
 -9 -4 10 0.93 1.21
 -9 4 10 0.99 2.72
 9 -4 -9 1.52 3.93
 -9 -4 9 1.27 1.1
 -9 4 9 4.94 2.63
 9 -4 -8 0.28 2.54
 -9 -4 8 2.35 1.22
 -9 4 8 1.66 3.84
 9 -4 -7 1.06 2.6
 -9 4 7 4.21 2.54
 -9 -4 7 1.66 1.36
 9 -4 -6 5.24 2.81
 -9 -4 6 0.76 2.09
 -9 4 6 2.82 2.51
 9 -4 -5 4.99 2.8
 -9 -4 5 2.35 1.41
 -9 4 5 3.38 2.6
 -9 -4 4 10.85 1.73
 -9 4 4 11.1 2.83
 -9 -4 3 2.79 2.44
 -9 4 3 9.86 3.86
 -9 -4 2 -0.24 1.69
 -9 4 2 1.47 2.39
 -9 -4 1 9.37 1.97
 -9 4 1 6.12 2.63
 -9 -4 0 6.97 2.08
 -9 4 0 7.67 3.88
 -9 -4 -1 3.71 2
 -9 -4 -1 2.29 0.92
 -9 4 -1 3.92 2.28
 -9 -4 -2 0.09 2.04
 -9 -4 -2 0.25 0.82
 -9 4 -2 -1.98 2.26
 -9 -4 -3 0.36 2.15
 -9 -4 -3 1.8 1.16
 -9 4 -3 -3.06 2.37
 -9 -4 -4 0.61 2.27
 -9 -4 -4 -0.46 1.01
 -9 4 -4 6.57 2.33
 -9 -4 -5 1.7 0.59
 -9 4 -5 5.09 2.36
 -9 -4 -5 5.04 2.35
 -9 -4 -6 3.83 2.4
 -9 -4 -6 0.03 0.73
 -9 4 -6 3.57 2.32
 -9 -4 -7 3.84 2.58
 -9 4 -7 5.87 3.92
 -9 -4 -8 3.63 2.58
 -9 4 -8 -0.16 2.32
 -9 -4 -9 12.24 3.02
 -9 4 -9 9.95 2.83
 -9 4 -10 1.46 2.42
 -9 -4 -10 -2.69 2.73
 -9 -4 -11 1.16 2.94
 -9 4 -11 1.57 2.53
 -9 -4 -12 -4.73 3.11
 -9 4 -12 0.56 2.55
 -9 -4 -13 -8.59 3.39
 -9 4 -13 0.03 4.3
 -9 4 -14 6.31 2.61
 -9 -4 -14 -5.5 3.25
 -9 -4 -15 5.44 3.42
 -9 4 -15 1.28 2.85
 -9 -4 -16 9.28 3.53
 -9 4 -16 -0.67 2.85
 -9 -4 -17 5.16 3.68
 -9 4 -17 0.46 2.83
 -9 4 -18 7.43 3.08
 -9 -4 -18 6.5 6.11
 -9 -4 -19 -6.7 5.16
 -9 4 -19 0.95 2.74
 -9 -4 -20 -1.04 3.56
 -9 4 -20 2.81 2.74
 -9 -4 -21 2.26 3.64
 -9 4 -21 3.37 2.85
 -9 -4 -22 2.46 3.5
 -9 4 -22 -1.96 2.79
 -9 -4 -23 -2.63 3.73
 -9 4 -23 -0.5 2.88
 -9 -4 -24 -8.8 3.89
 -9 4 -24 -0.25 2.97
 -9 -4 -25 -2.01 3.98
 -9 -4 -26 4.52 6.78
 9 -5 -29 -1.42 3.72
 -9 5 29 -2.76 4.5
 9 -5 -28 1.23 3.48
 -9 5 28 -0.95 4.14
 9 -5 -27 -6.19 3.62
 -9 5 27 4.38 6.73
 9 -5 -26 3.16 5.2
 -9 5 26 -0.07 4.17
 9 -5 -25 6.74 3.56
 -9 5 25 0.49 4.03
 9 -5 -24 8.21 3.73
 -9 5 24 3.64 4.35
 9 -5 -23 -1.59 5.26
 -9 5 23 -1.84 3.9
 9 -5 -22 7.35 3.83
 -9 5 22 13.41 6.7
 9 -5 -21 1.36 3.28
 -9 5 21 2.25 3.94
 9 -5 -20 0.48 3.31
 -9 5 20 6.61 3.93
 9 -5 -19 3.98 3.42
 -9 5 19 3.2 6.16
 9 -5 -18 4.62 5.24
 -9 5 18 6 3.99
 9 -5 -17 -1.6 3.13
 -9 5 17 2.73 3.7
 9 -5 -16 9.86 3.49
 -9 5 16 5.71 4.17
 9 -5 -15 5.78 3.44
 -9 5 15 5.41 3.92
 9 -5 -14 5.9 3.38
 -9 5 14 2.57 3.86
 9 -5 -13 -1.19 4.77
 -9 5 13 1.55 3.33
 9 -5 -12 10.4 3.24
 -9 -5 12 2.36 1
 -9 5 12 -1.41 3.48
 9 -5 -11 -0.78 3.16
 -9 -5 11 2.36 1.8
 -9 5 11 0.86 5.04
 9 -5 -10 5.11 3.21
 -9 -5 10 1.25 2.02
 -9 5 10 -1.45 3.3
 9 -5 -9 4.18 3.18
 -9 5 9 7.17 3.23
 -9 -5 9 0.63 1.42
 9 -5 -8 23.34 6.84
 -9 -5 8 23.38 2.09
 -9 5 8 28.93 6.45
 9 -5 -7 14.06 4.09
 -9 -5 7 10.04 3.05
 -9 5 7 13.75 3.6
 9 -5 -6 -1.08 3.56
 -9 -5 6 0.91 1.84
 -9 5 6 3.19 3.14
 -9 -5 5 1.51 1.87
 -9 5 5 -4.52 4.59
 -9 -5 4 4.33 3.14
 -9 5 4 3.97 2.93
 -9 -5 3 -1.62 3.09
 -9 5 3 -2.84 2.96
 -9 -5 2 31.09 2.93
 -9 5 2 23.44 4
 -9 -5 1 2.49 2.15
 -9 5 1 -0.14 2.85
 -9 -5 0 -0.81 2.21
 -9 5 0 -1.95 2.88
 -9 -5 -1 0.06 2.32
 -9 5 -1 6.76 2.94
 -9 -5 -2 8.18 2.62
 -9 5 -2 9.3 5.04
 -9 -5 -3 11.13 2.8
 -9 5 -3 11.95 3.34
 -9 -5 -4 1.58 2.51
 -9 5 -4 5.02 2.99
 -9 -5 -5 5.35 2.74
 -9 5 -5 4.49 3.12
 -9 -5 -6 7.13 2.88
 -9 5 -6 6.86 4.96
 -9 -5 -7 4.96 2.92
 -9 5 -7 14.18 4.86
 -9 -5 -8 2.01 2.97
 -9 5 -8 1.66 2.93
 -9 -5 -9 0.97 2.93
 -9 5 -9 -4.02 2.97
 -9 -5 -10 -0.63 3.12
 -9 5 -10 4.39 3.15
 -9 -5 -11 2.44 3.25
 -9 5 -11 2.25 3.02
 -9 -5 -12 0.22 3.23
 -9 5 -12 4.11 4.92
 -9 -5 -13 3.82 3.49
 -9 5 -13 -1.22 4.82
 -9 -5 -14 -3.36 5.37
 -9 5 -14 3.77 3.17
 -9 -5 -15 -4.87 5.54
 -9 5 -15 3.69 3.19
 -9 -5 -16 -1.1 5.92
 -9 5 -16 2.58 3.11
 -9 -5 -17 -5.08 3.77
 -9 5 -17 2 3.08
 -9 -5 -18 1.48 4.11
 -9 5 -18 4.51 3.25
 -9 -5 -19 5.86 3.94
 -9 5 -19 -4.11 3.09
 -9 -5 -20 3.2 4.17
 -9 5 -20 4.03 3.26
 -9 -5 -21 -3.46 4.09
 -9 5 -21 0.22 3.11
 -9 -5 -22 5.83 4.58
 -9 -5 -23 9.41 7.67
 -9 -5 -24 -2.24 4.29
 9 -6 -26 3.38 4.14
 -9 6 26 8.1 4.93
 9 -6 -25 5.08 3.83
 -9 6 25 0.93 4.67
 9 -6 -24 -2.48 3.82
 -9 6 24 3.09 6.94
 9 -6 -23 7.93 3.92
 -9 6 23 1.13 4.64
 9 -6 -22 4.93 5.72
 -9 6 22 0.88 4.47
 9 -6 -21 7.88 3.97
 -9 6 21 7.89 7.13
 9 -6 -20 -0.44 3.65
 -9 6 20 6.73 4.26
 9 -6 -19 -2.46 3.64
 -9 6 19 0.98 4.14
 9 -6 -18 4.06 3.75
 -9 6 18 -0.67 4.04
 9 -6 -17 7.07 5.78
 -9 6 17 1.79 4.37
 9 -6 -16 5.32 4.06
 -9 6 16 6.15 4.49
 9 -6 -15 6.41 4.15
 -9 6 15 7.51 4.38
 9 -6 -14 4.2 5.76
 -9 6 14 -1.72 4.09
 9 -6 -13 7.94 3.95
 -9 6 13 5.12 4.38
 9 -6 -12 -9.04 3.85
 -9 6 12 4.31 4.28
 9 -6 -11 -12.66 4.33
 -9 6 11 3.24 6.61
 9 -6 -10 3.16 3.88
 -9 -6 10 -1.65 2.57
 -9 6 10 3.32 3.91
 9 -6 -9 0.55 6.08
 -9 -6 9 -1.03 1.84
 -9 6 9 -3.3 3.74
 9 -6 -8 1.54 4.22
 -9 -6 8 2.48 2.03
 -9 6 8 2.68 5.77
 9 -6 -7 12.36 4.51
 -9 -6 7 3.89 3.49
 -9 6 7 9.41 4.12
 -9 -6 6 1.66 2.11
 -9 6 6 -1.29 3.62
 -9 -6 5 3.8 2.34
 -9 6 5 2.5 3.78
 -9 -6 4 8.29 2.72
 -9 6 4 24.11 6.24
 -9 -6 3 6.28 2.71
 -9 6 3 5.94 3.9
 -9 6 2 0.64 3.44
 -9 6 1 9.32 4
 -9 6 0 16.56 6.4
 9 6 1 1.63 2.42
 -9 6 -1 5.71 3.45
 9 6 2 -3.04 2.48
 -9 6 -2 1.26 3.42
 9 6 3 0.75 2.52
 -9 6 -3 4.4 3.54
 9 6 4 -0.56 2.47
 -9 6 -4 2.26 3.36
 9 6 5 0.77 2.67
 -9 6 -5 3.38 5.42
 9 6 6 -2.2 2.71
 -9 6 -6 6.35 3.52
 9 6 7 -2.57 2.73
 -9 6 -7 -1.17 3.51
 -9 6 -8 -0.3 3.56
 -9 6 -9 2.85 3.61
 -9 -6 -10 2.3 3.51
 -9 6 -10 3.52 5.65
 -9 -6 -11 0.58 3.53
 -9 6 -11 0.75 5.3
 -9 -6 -12 6.51 3.77
 -9 6 -12 0.08 3.75
 -9 6 -13 4.97 3.85
 -9 -6 -13 2.96 3.84
 -9 -6 -14 2.73 3.89
 -9 6 -14 0.93 3.62
 -9 -6 -15 0.24 3.83
 -9 6 -15 3.91 3.66
 -9 -6 -16 -4.79 4.04
 -9 6 -16 8.45 3.66
 -9 -6 -17 0.72 4.22
 -9 6 -17 6.97 3.83
 -9 -6 -18 2.82 6.73
 -9 6 -18 6.19 3.86
 -9 -6 -19 -2.22 7.01
 -9 6 -19 5.62 3.77
 -9 -6 -20 3.03 4.41
 -9 -6 -21 0.66 4.53
 9 -7 -22 6.63 4.22
 -9 7 22 1.36 5.12
 9 -7 -21 -1.04 4.11
 -9 7 21 -5 4.9
 9 -7 -20 6.18 4.21
 -9 7 20 2.56 5.07
 9 -7 -19 -5.78 4.28
 -9 7 19 1.35 7.44
 9 -7 -18 -0.89 6.18
 -9 7 18 1.59 4.57
 9 -7 -17 1.92 4.3
 -9 7 17 5.85 4.71
 9 -7 -16 -0.55 4.19
 -9 7 16 -0.6 4.31
 9 -7 -15 9.07 6.53
 -9 7 15 0.35 4.78
 9 -7 -14 -10.66 4.26
 -9 7 14 4.06 4.65
 9 -7 -13 3.77 4.05
 -9 7 13 -1.95 4.43
 9 -7 -12 -3.28 6.76
 -9 7 12 -3.51 7.37
 9 -7 -11 12.75 4.8
 -9 7 11 5.29 4.86
 9 -7 -10 -8.39 4.39
 -9 7 10 5.6 4.48
 9 -7 -9 9.65 4.62
 -9 7 9 -4.33 4.48
 9 -7 -8 -4.46 4.7
 -9 7 8 -0.71 6.79
 9 -7 -7 4.83 4.63
 -9 -7 7 -1.48 2.33
 -9 7 7 4.12 4.08
 -9 -7 6 1.38 2.45
 -9 7 6 5.5 4.13
 -9 7 5 -1.18 4.13
 -9 7 4 -2.54 6.31
 9 7 -3 0.11 2.34
 -9 7 3 1.15 4.13
 9 7 -2 2.08 2.43
 -9 7 2 -2.23 4.07
 9 7 -1 2.36 2.52
 -9 7 1 -4.57 4.03
 9 7 0 5.43 2.7
 -9 7 0 1.93 4.3
 9 7 1 0.37 2.69
 -9 7 -1 2.75 6.26
 9 7 2 4.05 2.83
 -9 7 -2 1.42 4.23
 9 7 3 1.6 2.85
 -9 7 -3 5.11 4.19
 9 7 4 2.86 2.93
 -9 7 -4 1.88 4.23
 9 7 5 3.28 2.91
 -9 7 -5 0.97 4.14
 9 7 6 -1.43 2.98
 -9 7 -6 0.03 3.94
 9 7 7 -2.34 3.06
 -9 7 -7 11.67 6.32
 9 7 8 14.68 3.8
 -9 7 -8 11.71 7.37
 9 7 9 5.31 3.36
 -9 7 -9 1.78 4.19
 9 7 10 -2.19 3.14
 -9 7 -10 5.08 3.96
 9 7 11 -2.86 3.3
 -9 7 -11 3.64 3.99
 -9 7 -12 5.04 4.29
 -9 -7 -13 0.99 3.93
 -9 7 -13 -0.32 4
 -9 -7 -14 5.4 4.32
 -9 7 -14 4.37 4.25
 -9 -7 -15 -1.05 4.25
 -9 7 -15 5.13 4.25
 -9 -7 -16 1.97 4.51
 -9 7 -16 3.74 4.12
 -9 -7 -17 0.31 4.36
 9 -8 -16 3.35 4.7
 -9 8 16 -0.75 5.05
 9 -8 -15 -1.8 4.56
 -9 8 15 1.55 4.96
 9 -8 -14 -8.25 4.8
 -9 8 14 -1.15 5.18
 9 -8 -13 1.44 4.67
 -9 8 13 5.37 7.62
 9 -8 -12 2.41 4.9
 -9 8 12 3.27 5.03
 9 -8 -11 -2.5 4.88
 -9 8 11 10.08 5.06
 9 -8 -10 4.04 4.83
 -9 8 10 1.3 5.03
 9 -8 -9 -0.43 5.12
 -9 8 9 7.27 4.96
 9 -8 -8 -1.65 4.86
 -9 8 8 5.94 7.38
 9 -8 -7 0.58 5.01
 -9 8 7 2.44 4.83
 -9 8 6 -2.97 4.97
 -9 8 5 -6.68 5.3
 9 8 -4 -0.71 2.69
 -9 8 4 -0.62 4.72
 9 8 -3 1.28 2.84
 -9 8 3 2.57 7.1
 9 8 -2 4.69 3
 -9 8 2 5.62 4.72
 9 8 -1 -3.43 2.98
 -9 8 1 -2.47 4.65
 9 8 0 -3.9 3.02
 -9 8 0 0.31 4.58
 9 8 1 5.15 3.2
 -9 8 -1 4.95 4.75
 9 8 2 -2.08 3.08
 -9 8 -2 -1.42 6.87
 9 8 3 -2.19 3.07
 -9 8 -3 1.62 6.89
 9 8 4 1.93 3.28
 -9 8 -4 4.1 4.73
 9 8 5 -0.99 3.18
 -9 8 -5 4.74 4.39
 9 8 6 3.75 3.29
 -9 8 -6 -2.2 4.68
 9 8 7 3.44 3.44
 -9 8 -7 7.1 4.87
 9 8 8 3.15 3.36
 -9 8 -8 -4.91 4.7
 9 8 9 1.14 3.46
 -9 8 -9 -6.59 4.68
 9 8 10 0.98 3.67
 -9 8 -10 -1.66 7.23
 9 8 11 -0.91 3.61
 -9 8 -11 1.89 7.33
 10 0 -33 -1.38 3.83
 10 0 -32 2.84 3.71
 10 0 -31 -0.13 3.48
 10 0 -30 -0.85 3.38
 10 0 -29 -4.87 3.51
 10 0 -28 5.15 5.22
 10 0 -27 -0.69 3.1
 10 0 -26 23.09 3.96
 10 0 -25 -4.6 3.07
 10 0 -24 1.09 4.23
 -10 0 24 1.48 1.59
 10 0 -23 0.56 2.68
 -10 0 23 -0.4 1.53
 10 0 -22 1.5 2.69
 -10 0 22 2.53 1.67
 10 0 -21 2.95 2.58
 -10 0 21 2.25 1.72
 10 0 -20 4.29 3.8
 -10 0 20 2.75 1.78
 10 0 -19 1.04 2.15
 -10 0 19 -4 2.48
 10 0 -18 13.23 2.46
 -10 0 18 6.54 2.73
 10 0 -17 -2.7 2.01
 -10 0 17 0.17 2.36
 10 0 -16 -0.11 2.95
 -10 0 16 3.83 2.32
 10 0 -15 1.63 1.7
 -10 0 15 0.46 2.18
 10 0 -14 3.52 1.68
 -10 0 14 1.65 2.31
 10 0 -13 1.55 1.65
 -10 0 13 3.51 1.45
 10 0 -12 -1.77 2.35
 -10 0 12 3.24 1.35
 10 0 -11 1.82 1.46
 -10 0 11 -1.27 1.3
 10 0 -10 0.25 1.36
 -10 0 10 1.95 1.24
 10 0 -9 -0.76 1.99
 -10 0 9 3.96 1.24
 10 0 -8 1.29 1.23
 -10 0 8 -1.91 1.81
 10 0 -7 1 1.2
 -10 0 7 2.06 1.23
 10 0 -6 30.2 1.72
 -10 0 6 31.32 1.74
 10 0 -5 0.54 1.75
 -10 0 5 1.93 1.2
 10 0 -4 12.63 1.37
 -10 0 4 21.93 1.5
 10 0 -3 0.14 0.99
 -10 0 3 -2.05 1.78
 10 0 -2 6.28 1.08
 -10 0 2 4.84 1.32
 10 0 -1 1.07 0.94
 -10 0 1 3.25 2.04
 10 0 0 44.74 2.24
 -10 0 0 43.92 2.33
 10 0 1 -1.08 0.84
 -10 0 -1 -0.7 1.39
 10 0 2 20.71 1.14
 -10 0 -2 20.26 2.95
 10 0 3 -3.09 1.27
 -10 0 -3 0.52 1.49
 10 0 4 -1.05 0.77
 -10 0 -4 -0.19 1.55
 10 0 5 1.04 1.19
 -10 0 -5 0.54 1.67
 10 0 6 1.66 0.79
 -10 0 -6 2.03 2.48
 10 0 7 -0.32 1.12
 -10 0 -7 -1.45 1.7
 10 0 8 1.2 1.1
 -10 0 -8 0.45 1.77
 10 0 9 0.93 0.72
 -10 0 -9 0.42 1.72
 10 0 10 2.71 1.13
 -10 0 -10 0.49 1.88
 10 0 11 -0.81 0.74
 -10 0 -11 0.79 1.91
 -10 0 -12 10.22 2.36
 -10 0 -13 0.34 2.07
 -10 0 -14 3.14 2.24
 -10 0 -15 -0.85 2.31
 -10 0 -16 9.51 4.2
 -10 0 -17 9.43 4.24
 -10 0 -18 2.17 2.57
 -10 0 -19 2.79 2.7
 -10 0 -20 -0.17 2.61
 -10 0 -21 -1 2.79
 -10 0 -22 1.01 2.84
 -10 0 -23 1.04 2.92
 -10 0 -24 1.71 3.04
 -10 0 -25 2.62 3.07
 -10 0 -26 1.03 3.12
 -10 0 -27 -1.76 3.23
 -10 0 -28 6.71 3.55
 10 -1 -34 0.63 3.88
 10 -1 -33 -0.26 5.81
 10 -1 -32 0 3.58
 10 -1 -31 -5.28 3.67
 10 -1 -30 2.33 3.51
 10 -1 -29 -4.57 5.46
 10 -1 -28 -0.25 3.16
 10 -1 -27 -3.17 3.14
 10 1 -27 2.33 3.18
 10 1 -26 6.61 3.26
 10 -1 -26 9.31 5
 -10 1 26 5.09 2.33
 10 1 -25 6.5 2.97
 10 -1 -25 -4.22 2.93
 -10 1 25 0.86 3.37
 10 1 -24 0.93 2.81
 10 -1 -24 4.92 2.78
 -10 1 24 -1.56 2.18
 10 1 -23 8.94 2.92
 10 -1 -23 1.15 2.88
 -10 1 23 3.62 2.27
 10 1 -22 1.64 3.93
 10 -1 -22 2.73 3.92
 -10 1 22 -3 3.29
 10 1 -21 86.96 8.71
 10 -1 -21 93.56 6.06
 -10 -1 21 92.43 3.91
 -10 1 21 99.64 5.56
 10 1 -20 0.38 2.32
 10 -1 -20 -3.77 2.24
 -10 -1 20 0.6 1.07
 -10 1 20 1.63 2.15
 10 1 -19 38.4 3.43
 10 -1 -19 35.74 5.3
 -10 -1 19 33.54 1.86
 -10 1 19 36.71 4.42
 10 1 -18 2.91 0.84
 10 1 -18 4.6 2.22
 10 -1 -18 6.3 2.24
 -10 -1 18 9.28 1.85
 -10 1 18 3.53 3.02
 10 1 -17 5.1 1.41
 10 1 -17 11.8 2.23
 10 -1 -17 3.38 2.27
 -10 -1 17 6.94 1.29
 -10 1 17 9.36 2.07
 10 1 -16 3.58 2.92
 10 1 -16 -1.08 1.35
 10 -1 -16 -2.1 1.95
 -10 1 16 0.57 1.88
 -10 -1 16 0.18 1.14
 10 1 -15 5.79 1.57
 10 1 -15 5.77 1.95
 10 -1 -15 9.17 2.02
 -10 -1 15 6.67 1.89
 -10 1 15 3.31 3
 10 1 -14 -0.42 0.98
 10 1 -14 -1.84 1.67
 10 -1 -14 1.78 1.72
 -10 -1 14 2.86 1.14
 -10 1 14 -1.07 1.74
 10 1 -13 -0.33 1.62
 10 -1 -13 0.59 1.71
 10 1 -13 0.55 1.02
 -10 -1 13 1.18 1.06
 -10 1 13 3.62 1.69
 10 1 -12 -1.72 1.5
 10 1 -12 0.3 1.03
 10 -1 -12 0.15 1.66
 -10 -1 12 -0.43 1.07
 -10 1 12 -0.43 1.65
 10 1 -11 11.75 1.88
 10 1 -11 8.33 1.68
 10 -1 -11 14.12 1.89
 -10 -1 11 10.99 1.24
 -10 1 11 7.33 2.85
 10 1 -10 33.78 1.81
 10 1 -10 29.22 3.08
 10 -1 -10 35.32 3.45
 -10 1 10 33.94 2.34
 -10 -1 10 37.2 1.73
 10 1 -9 0.9 1.26
 10 -1 -9 -0.46 1.47
 -10 -1 9 -0.21 1.01
 -10 1 9 0.74 1.47
 10 1 -8 8.21 1.4
 10 -1 -8 10.64 1.65
 -10 -1 8 9.88 1.14
 -10 1 8 5.46 2.6
 10 1 -7 0.26 1.12
 10 -1 -7 -1.36 2.07
 -10 1 7 0.16 1.4
 -10 -1 7 0.21 1.52
 10 1 -6 16.92 1.38
 10 -1 -6 15.28 1.64
 -10 1 6 9.92 2.6
 -10 -1 6 17.58 1.37
 10 1 -5 9.39 1.17
 10 -1 -5 9.27 2.21
 -10 1 5 11.67 1.53
 -10 -1 5 9.69 1.26
 10 1 -4 2.59 0.97
 10 -1 -4 1.93 1.26
 -10 -1 4 2.29 1.14
 -10 1 4 1.71 1.42
 10 1 -3 0.76 1.37
 10 -1 -3 0.62 1.23
 -10 -1 3 1.36 1.11
 -10 -1 3 2.17 1.18
 -10 1 3 2 1.41
 10 1 -2 3.41 1.28
 10 -1 -2 1.78 1.27
 -10 -1 2 1.93 1.32
 -10 -1 2 -0.46 1.63
 -10 1 2 4.58 1.41
 10 1 -1 -1.24 1.14
 10 -1 -1 1.88 1.19
 -10 -1 1 -0.51 0.92
 -10 -1 1 0.48 1.22
 -10 1 1 0.71 1.39
 10 1 0 3.05 1.16
 10 -1 0 3.12 1.16
 -10 1 0 3.67 2.27
 -10 -1 0 5.26 0.94
 -10 -1 0 3.69 1.4
 10 1 1 2.65 0.66
 10 -1 1 1.25 1.13
 -10 -1 -1 -1.54 1.32
 -10 1 -1 0.47 1.42
 -10 -1 -1 2.33 0.89
 10 1 2 1.6 0.94
 10 -1 2 0.78 1.71
 -10 1 -2 4.3 1.53
 -10 -1 -2 0.32 1.46
 10 1 3 2.8 0.88
 10 -1 3 4.99 1.17
 -10 -1 -3 6.61 1.55
 -10 1 -3 7.29 1.78
 10 1 4 1.84 0.72
 10 -1 4 0.62 1.16
 -10 -1 -4 0.6 1.49
 -10 1 -4 2.04 1.68
 10 -1 5 -0.9 1.18
 10 1 5 2.27 0.63
 -10 -1 -5 -0.68 1.58
 -10 1 -5 0.55 1.65
 10 1 6 0.53 0.47
 -10 -1 -6 1.9 2.5
 -10 1 -6 -1.47 2.71
 10 1 7 0.21 0.29
 -10 1 -7 1.07 1.7
 -10 -1 -7 2.45 2.67
 -10 -1 -8 0.08 1.79
 -10 1 -8 0.2 1.74
 -10 -1 -9 1.12 1.92
 -10 1 -9 2.32 1.82
 -10 1 -10 -0.7 1.87
 -10 -1 -10 2.48 2.02
 -10 1 -11 2.93 2.1
 -10 -1 -11 7 2.22
 -10 -1 -12 -3.69 2.26
 -10 1 -12 0.9 3.14
 -10 -1 -13 1.1 2.28
 -10 1 -13 -1.82 3.1
 -10 -1 -14 -0.83 2.38
 -10 1 -14 -4.99 3.56
 -10 1 -15 3.3 2.39
 -10 -1 -15 1.81 2.62
 -10 -1 -16 4.7 2.66
 -10 1 -16 -0.3 2.46
 -10 -1 -17 6.22 2.57
 -10 1 -17 -4.75 2.51
 -10 -1 -18 0.13 2.73
 -10 1 -18 -0.18 2.56
 -10 -1 -19 -0.46 2.94
 -10 1 -19 2.32 2.63
 -10 -1 -20 1.53 3.06
 -10 1 -20 1.29 2.75
 -10 -1 -21 3.5 3.26
 -10 1 -21 2.58 2.94
 -10 1 -22 2.93 2.96
 -10 -1 -22 0.55 4.85
 -10 1 -23 6.22 4.84
 -10 -1 -24 4.42 5.04
 -10 1 -24 -0.06 4.63
 -10 -1 -25 5.07 3.28
 -10 1 -25 -6.95 4.46
 -10 -1 -26 -2.38 3.4
 -10 1 -26 1.92 2.94
 -10 1 -27 -0.31 2.96
 -10 -1 -27 1.74 3.41
 -10 -1 -28 1.25 3.59
 -10 1 -28 0.32 3.11
 10 -2 -34 2.89 4.08
 10 -2 -33 9.62 6.39
 10 -2 -32 0.75 3.71
 10 -2 -31 0.59 3.53
 10 -2 -30 -5.41 5.68
 10 -2 -29 6.93 3.63
 10 -2 -28 2.64 3.46
 -10 2 28 3.91 2.87
 10 -2 -27 1.34 3.14
 -10 2 27 -0.83 2.77
 10 -2 -26 1.96 3.14
 -10 2 26 2.29 2.78
 10 -2 -25 8.84 3.34
 -10 2 25 6.58 3.11
 10 -2 -24 -1.26 2.95
 -10 2 24 9.18 4.31
 10 -2 -23 1.12 4.41
 -10 2 23 3.71 2.71
 10 -2 -22 1.6 2.71
 -10 2 22 2.13 4.28
 10 -2 -21 17.95 3.13
 -10 2 21 14.38 3.3
 10 -2 -20 7.02 3.99
 -10 2 20 2.95 2.78
 10 -2 -19 9.59 2.6
 -10 2 19 6.03 4.32
 10 -2 -18 6.98 2.21
 -10 -2 18 -0.26 0.84
 -10 2 18 -1.58 2.36
 10 -2 -17 8.32 2.5
 -10 -2 17 7.31 0.56
 -10 -2 17 6.52 0.84
 -10 2 17 16.27 4.01
 10 2 -16 -3.05 2.04
 10 -2 -16 -0.54 2.18
 -10 -2 16 0.11 0.56
 -10 -2 16 0.45 0.8
 -10 2 16 1.13 2.18
 10 -2 -15 -0.39 2.05
 10 2 -15 0.64 1.84
 -10 -2 15 -0.49 0.87
 -10 2 15 0.78 2.12
 10 2 -14 2.14 1.75
 10 -2 -14 -0.99 1.95
 -10 -2 14 -1.4 1.42
 -10 2 14 1.29 2.13
 10 2 -13 -0.82 0.85
 10 2 -13 -2.79 1.72
 10 -2 -13 4.05 1.93
 -10 -2 13 -0.25 0.88
 -10 2 13 0.53 2
 10 2 -12 3.9 1.71
 10 -2 -12 0.48 3.04
 10 2 -12 4.45 0.98
 -10 -2 12 4.97 0.97
 -10 2 12 3.42 3.22
 10 2 -11 -1.46 1.55
 10 2 -11 2.06 0.99
 10 -2 -11 5.36 1.79
 -10 -2 11 1.09 1.44
 -10 2 11 2.3 1.96
 10 2 -10 3.14 1.09
 10 2 -10 1.09 1.45
 10 -2 -10 1.41 1.74
 -10 -2 10 -0.74 1.48
 -10 2 10 1.09 1.94
 10 2 -9 0.72 1.15
 10 2 -9 4.56 1.39
 10 -2 -9 2.15 1.77
 -10 -2 9 3.64 1.55
 -10 2 9 0.74 1.93
 10 2 -8 -0.3 1.28
 10 -2 -8 -0.23 1.6
 -10 2 8 -0.83 1.73
 -10 -2 8 0.36 0.98
 10 2 -7 1.94 1.21
 10 -2 -7 0.48 2.5
 -10 -2 7 -0.17 1.04
 -10 2 7 -5.03 1.73
 10 2 -6 7.22 1.27
 10 -2 -6 6.94 1.71
 -10 2 6 7.77 1.95
 -10 -2 6 7.25 1.79
 10 2 -5 8.84 1.17
 10 -2 -5 8.77 2.7
 -10 -2 5 7.32 1.26
 -10 2 5 10.26 1.93
 10 2 -4 4.17 1.08
 10 -2 -4 2.85 1.6
 -10 -2 4 3.64 1.18
 -10 2 4 2.03 1.69
 10 2 -3 3.03 0.96
 10 -2 -3 -0.11 1.46
 -10 -2 3 0.65 1.2
 -10 2 3 -2.66 1.64
 10 -2 -2 -1.93 1.52
 -10 -2 2 0.77 1.88
 -10 2 2 -0.86 1.62
 -10 -2 2 0.56 0.98
 10 -2 -1 10.17 1.68
 -10 -2 1 5.88 1.03
 -10 -2 1 6.52 1.47
 -10 2 1 7.34 1.84
 10 -2 0 28.75 2.27
 -10 -2 0 23.68 1.87
 -10 -2 0 25.4 1.99
 -10 2 0 25.01 3.68
 10 -2 1 9.57 1.96
 -10 -2 -1 10.95 1.4
 -10 -2 -1 10.98 1.74
 -10 2 -1 8.11 1.98
 -10 -2 -2 0.38 2.31
 -10 2 -2 1.15 1.73
 -10 -2 -2 1.57 1.06
 -10 -2 -3 0.03 0.89
 -10 -2 -3 2.87 1.59
 -10 2 -3 6.15 2.86
 -10 -2 -4 3.61 1.66
 -10 2 -4 -1.58 1.73
 -10 -2 -5 -0.1 1.72
 -10 2 -5 -2.49 1.79
 -10 -2 -6 0.55 1.75
 -10 2 -6 0.43 1.85
 -10 -2 -7 -4.39 1.94
 -10 2 -7 2.15 2.8
 -10 -2 -8 -1.46 2.04
 -10 2 -8 5.93 1.9
 -10 2 -9 -0.9 1.95
 -10 -2 -9 4.33 2.08
 -10 -2 -10 4.24 2.24
 -10 2 -10 3.99 2.05
 -10 -2 -11 18.02 2.72
 -10 2 -11 8.88 2.37
 -10 -2 -12 0.24 2.5
 -10 2 -12 5.4 2.14
 -10 2 -13 -0.1 3.69
 -10 -2 -13 6.87 2.65
 -10 -2 -14 1.76 2.41
 -10 2 -14 0.94 2.41
 -10 -2 -15 6.46 2.79
 -10 2 -15 3.62 2.6
 -10 -2 -16 -4.2 2.7
 -10 2 -16 4.08 2.5
 -10 2 -17 -2.37 2.5
 -10 -2 -17 4.22 2.82
 -10 -2 -18 1.25 2.95
 -10 2 -18 2.46 2.73
 -10 -2 -19 4.22 3.1
 -10 2 -19 -0.5 2.72
 -10 -2 -20 8.89 3.28
 -10 2 -20 -1.49 2.82
 -10 -2 -21 -1.4 3.2
 -10 2 -21 -0.57 2.74
 -10 -2 -22 -0.38 3.2
 -10 2 -22 -0.87 2.81
 -10 -2 -23 2.7 3.47
 -10 2 -23 4.96 3.01
 -10 -2 -24 11.38 5.54
 -10 2 -24 2.42 2.94
 -10 2 -25 -3.47 3.02
 -10 -2 -25 -1.43 5.57
 -10 -2 -26 6.18 3.91
 -10 2 -26 6.46 3.2
 -10 -2 -27 3.68 3.92
 -10 2 -27 1.13 3.16
 -10 -2 -28 4.15 4.02
 -10 2 -28 7.01 5.07
 10 -3 -32 1.15 3.87
 10 -3 -31 2.78 3.66
 10 -3 -30 -10.11 5.49
 -10 3 30 7.46 5.31
 10 -3 -29 -7.66 3.36
 -10 3 29 4.85 3.4
 10 -3 -28 -2.48 3.3
 -10 3 28 4.72 5.16
 10 -3 -27 0.56 3.32
 -10 3 27 -5.35 3.42
 10 -3 -26 2.77 3.25
 -10 3 26 4.31 5.18
 10 -3 -25 0.77 3.12
 -10 3 25 -2.97 3.19
 10 -3 -24 3.97 4.49
 -10 3 24 -2.51 4.76
 10 -3 -23 4.85 3.03
 -10 3 23 5.17 3.37
 10 -3 -22 4.92 2.95
 -10 3 22 9.68 5.27
 10 -3 -21 20.89 5.18
 -10 3 21 13.56 3.93
 10 -3 -20 7.07 2.99
 -10 3 20 6.33 5.21
 10 -3 -19 28.51 3.65
 -10 3 19 21.97 4.13
 10 -3 -18 33.24 5.9
 -10 3 18 39.45 6.73
 10 -3 -17 8.46 2.78
 -10 3 17 8.44 3.12
 10 -3 -16 11.28 2.78
 -10 3 16 10.73 4.66
 10 -3 -15 -3.26 2.33
 -10 -3 15 0.07 0.92
 -10 3 15 1.47 2.58
 10 -3 -14 0.77 2.33
 -10 -3 14 -0.27 0.73
 -10 -3 14 2.76 0.74
 -10 3 14 8.06 4.01
 10 -3 -13 20.86 4.24
 -10 -3 13 17.8 1.65
 -10 3 13 25.28 3.21
 -10 -3 13 21.07 1.6
 10 -3 -12 2.88 2.16
 -10 -3 12 0.84 0.9
 -10 -3 12 1.37 0.88
 -10 3 12 2.02 3.84
 10 -3 -11 0.79 2.15
 -10 -3 11 0.25 1.48
 -10 -3 11 1.82 0.96
 -10 3 11 5.89 2.36
 10 -3 -10 5.16 2.35
 -10 -3 10 3.01 1.14
 -10 -3 10 9.21 1.01
 -10 3 10 11.41 2.51
 10 -3 -9 -1.09 2.1
 -10 3 9 -0.88 2.27
 -10 -3 9 0.27 0.98
 10 -3 -8 5.92 3.27
 -10 -3 8 4.47 1.12
 -10 3 8 1.88 2.35
 10 -3 -7 10.25 2.31
 -10 -3 7 9.16 1.27
 -10 3 7 6.45 2.44
 10 -3 -6 5.69 2.17
 -10 -3 6 4.28 1.29
 -10 3 6 4.74 2.36
 10 -3 -5 5.32 2.18
 -10 3 5 6.31 3.35
 -10 -3 5 3.07 1.33
 10 -3 -4 4.2 2.27
 -10 -3 4 3.93 1.4
 -10 3 4 3.79 2.16
 10 -3 -3 10.42 2.42
 -10 -3 3 6.77 1.6
 -10 3 3 1.47 3.59
 10 -3 -2 4.96 2.29
 -10 -3 2 -0.84 1.42
 -10 3 2 -0.33 2.13
 -10 -3 1 1.49 2.35
 -10 3 1 -0.48 2.02
 -10 -3 1 2.81 1.43
 -10 -3 0 2.92 0.83
 -10 -3 0 2.85 1.71
 -10 3 0 2.59 3.04
 -10 -3 -1 31.98 1.86
 -10 -3 -1 30.75 2.63
 -10 3 -1 32.97 2.94
 -10 -3 -2 -1.22 1.87
 -10 -3 -2 0.17 1.06
 -10 3 -2 2.68 2.03
 -10 -3 -3 23.87 2.57
 -10 3 -3 28.23 3.91
 -10 -3 -3 20.3 1.35
 -10 -3 -4 -0.04 0.77
 -10 -3 -4 1.74 1.98
 -10 3 -4 4.45 2.07
 -10 -3 -5 4.93 3.43
 -10 3 -5 6.65 2.25
 -10 -3 -5 5.59 0.52
 -10 -3 -6 -4.44 3.23
 -10 3 -6 1 2.1
 -10 -3 -7 3.65 3.5
 -10 3 -7 3.38 3.38
 -10 -3 -8 0.46 3.56
 -10 3 -8 2.4 2.31
 -10 -3 -9 4.9 3.65
 -10 3 -9 -0.89 2.38
 -10 -3 -10 -0.73 3.75
 -10 3 -10 -1.19 2.39
 -10 -3 -11 4.41 3.86
 -10 3 -11 -2.64 2.4
 -10 -3 -12 15.41 4.93
 -10 3 -12 15.14 4.61
 -10 -3 -13 -1.96 4.35
 -10 3 -13 3.43 3.75
 -10 -3 -14 0.57 4.47
 -10 3 -14 -1.26 2.53
 -10 -3 -15 -0.63 3.09
 -10 3 -15 -0.88 2.6
 -10 -3 -16 1.82 3.35
 -10 3 -16 8.91 2.78
 -10 -3 -17 7.63 3.46
 -10 3 -17 0.35 2.78
 -10 -3 -18 12.75 3.75
 -10 3 -18 5.67 3.05
 -10 -3 -19 8.78 3.6
 -10 3 -19 0.23 2.86
 -10 -3 -20 9.65 3.61
 -10 3 -20 -1.39 2.8
 -10 -3 -21 -6.16 3.7
 -10 3 -21 -1.39 2.92
 -10 -3 -22 2 3.62
 -10 3 -22 0.18 2.83
 -10 -3 -23 1.53 3.71
 -10 3 -23 0.45 2.82
 -10 -3 -24 4.07 5.83
 -10 3 -24 0.88 2.95
 -10 -3 -25 3.2 3.85
 -10 3 -25 1.96 2.95
 -10 -3 -26 1.4 3.85
 -10 3 -26 -2.95 3.03
 10 -4 -31 -1.32 3.88
 -10 4 31 -2.2 6.38
 10 -4 -30 -0.6 3.76
 -10 4 30 6.16 4.11
 10 -4 -29 -3.81 3.6
 -10 4 29 -2 4
 10 -4 -28 4.49 3.84
 -10 4 28 9.66 4.21
 10 -4 -27 1.64 3.44
 -10 4 27 5.32 3.96
 10 -4 -26 2.31 3.33
 -10 4 26 0.35 5.8
 10 -4 -25 -2.03 3.13
 -10 4 25 3.44 3.63
 10 -4 -24 -0.59 3.14
 -10 4 24 2.72 5.54
 10 -4 -23 0.32 3.18
 -10 4 23 0.08 3.56
 10 -4 -22 2.59 3.25
 -10 4 22 2.13 3.63
 10 -4 -21 2.01 4.8
 -10 4 21 2.71 3.68
 10 -4 -20 -0.68 3.09
 -10 4 20 8.45 3.69
 10 -4 -19 -0.31 3.05
 -10 4 19 9.15 5.55
 10 -4 -18 -2.65 4.55
 -10 4 18 -1.49 3.57
 10 -4 -17 5.91 2.98
 -10 4 17 -1.92 3.41
 10 -4 -16 5.42 2.72
 -10 4 16 -8.57 3.22
 10 -4 -15 -8.51 2.95
 -10 4 15 2.51 3.28
 10 -4 -14 3.63 2.64
 -10 -4 14 -0.38 0.61
 -10 4 14 1.51 3.11
 10 -4 -13 19.76 5.07
 -10 4 13 15.95 3.73
 10 -4 -12 1.72 2.73
 -10 -4 12 3.33 1.38
 -10 4 12 0.68 4.62
 10 -4 -11 2.85 2.69
 -10 -4 11 1.77 1.52
 -10 4 11 0.78 2.95
 10 -4 -10 17.2 3.06
 -10 -4 10 14.37 1.98
 -10 4 10 16.24 3.53
 10 -4 -9 1.68 2.75
 -10 -4 9 2.75 1.27
 -10 4 9 5.18 2.83
 10 -4 -8 1.7 3.94
 -10 -4 8 0.66 1.26
 -10 4 8 -2.67 2.55
 10 -4 -7 4.03 2.92
 -10 -4 7 4.54 1.45
 -10 4 7 2.49 4.18
 10 -4 -6 6.01 2.87
 -10 -4 6 1.62 2.39
 -10 4 6 3 2.74
 10 -4 -5 4.54 2.91
 -10 -4 5 -1.5 1.53
 -10 4 5 1.96 2.6
 10 -4 -4 1.39 2.88
 -10 -4 4 0.19 1.65
 -10 4 4 4.72 4.16
 10 -4 -3 4.34 4.65
 -10 -4 3 -0.03 2.58
 -10 4 3 0.84 2.58
 -10 -4 2 3.49 1.81
 -10 4 2 -0.77 2.77
 -10 -4 1 8.28 2.04
 -10 4 1 5.09 4.4
 -10 -4 0 -1.34 1.87
 -10 4 0 1.56 2.4
 -10 -4 -1 -0.15 1.92
 -10 -4 -1 1.89 1.38
 -10 4 -1 2.69 2.52
 -10 -4 -2 7.52 2.21
 -10 -4 -2 5.91 0.87
 -10 4 -2 7.69 2.7
 -10 -4 -3 9.46 3.33
 -10 -4 -3 0.58 1.14
 -10 4 -3 3.59 2.46
 -10 -4 -4 -2.95 3.31
 -10 4 -4 2.26 2.41
 -10 -4 -5 11.12 4.2
 -10 4 -5 6.68 2.8
 -10 -4 -6 -0.57 3.91
 -10 4 -6 2.79 4.02
 -10 -4 -7 -5.09 4.01
 -10 4 -7 2.6 2.54
 -10 4 -8 0.21 2.67
 -10 -4 -8 10.78 4.52
 -10 -4 -9 3.53 4.57
 -10 4 -9 1.73 2.62
 -10 -4 -10 -2.92 4.76
 -10 4 -10 3.97 2.77
 -10 -4 -11 12.08 4.65
 -10 4 -11 3.46 2.96
 -10 4 -12 19.96 5.13
 -10 -4 -12 6.45 5.34
 -10 -4 -13 3.66 3.2
 -10 4 -13 4.62 2.9
 -10 -4 -14 0.47 3.29
 -10 4 -14 5.36 3.02
 -10 -4 -15 -0.54 3.41
 -10 4 -15 6.65 3.1
 -10 -4 -16 -3.02 3.39
 -10 4 -16 2.32 2.83
 -10 -4 -17 -0.09 3.45
 -10 4 -17 -1.36 2.92
 -10 -4 -18 -0.53 3.59
 -10 4 -18 2.94 2.9
 -10 -4 -19 3.13 3.57
 -10 4 -19 1.54 2.81
 -10 4 -20 2.2 3
 -10 -4 -20 0.87 3.66
 -10 -4 -21 1.75 3.7
 -10 4 -21 0.48 2.98
 -10 -4 -22 -4.25 5.88
 -10 4 -22 3.17 3.04
 -10 -4 -23 -6.58 4
 -10 4 -23 1.22 3.1
 -10 4 -24 -2.05 3.09
 -10 -4 -24 -2.55 4.15
 -10 -4 -25 0.75 4.26
 10 -5 -29 6.82 3.86
 -10 5 29 -2.59 4.61
 10 -5 -28 -0.1 3.73
 -10 5 28 -2.6 4.46
 10 -5 -27 1 3.62
 -10 5 27 2.29 4.27
 10 -5 -26 -1.91 5.47
 -10 5 26 -0.83 6.56
 10 -5 -25 2.66 3.55
 -10 5 25 1.06 4.33
 10 -5 -24 2.51 3.55
 -10 5 24 0.06 4.16
 10 -5 -23 -0.9 5.53
 -10 5 23 -6.33 6.52
 10 -5 -22 4.1 3.6
 -10 5 22 2.86 4.2
 10 -5 -21 -0.19 3.41
 -10 5 21 3.02 3.9
 10 -5 -20 2.15 3.5
 -10 5 20 3.23 4.26
 10 -5 -19 3.18 3.5
 -10 5 19 4.73 4.09
 10 -5 -18 12 3.88
 -10 5 18 21.42 7.32
 10 -5 -17 8.84 3.64
 -10 5 17 3.48 4.38
 10 -5 -16 4.62 3.5
 -10 5 16 6.57 4.2
 10 -5 -15 8.95 5.48
 -10 5 15 4.26 6.23
 10 -5 -14 8.32 3.61
 -10 5 14 -1.41 3.75
 10 -5 -13 10.13 3.86
 -10 5 13 8.31 3.92
 10 -5 -12 6.05 3.44
 -10 -5 12 2.63 1.14
 -10 5 12 8.93 5.61
 10 -5 -11 -0.38 3.2
 -10 -5 11 1.24 1.82
 -10 5 11 -1.32 3.43
 10 -5 -10 -0.71 3.34
 -10 5 10 -0.91 3.32
 -10 -5 10 1.2 1.27
 10 -5 -9 3.85 3.58
 -10 -5 9 2.78 1.58
 -10 5 9 -5 5.21
 10 -5 -8 14.2 4.02
 -10 -5 8 5.85 1.89
 -10 5 8 14.9 3.78
 10 -5 -7 22.63 6.18
 -10 -5 7 9.25 2.88
 -10 5 7 5.63 3.69
 10 -5 -6 6.88 3.95
 -10 -5 6 6.57 1.98
 -10 5 6 13.47 5.34
 10 -5 -5 21.73 4.61
 -10 -5 5 16.23 2.41
 -10 5 5 10.9 3.86
 -10 -5 4 -2.74 2.96
 -10 5 4 4.1 3.14
 -10 -5 3 23.09 4.18
 -10 5 3 11.6 5.74
 -10 -5 2 1.25 2.34
 -10 5 2 2.78 3.01
 -10 -5 1 3 2.38
 -10 5 1 3.87 3.13
 -10 -5 0 4.69 2.52
 -10 5 0 -1.59 3.08
 -10 -5 -1 15.07 3.08
 -10 5 -1 15.23 5.5
 -10 5 -2 14.88 3.79
 -10 -5 -2 18.38 3.26
 -10 -5 -3 8.97 2.95
 -10 5 -3 4.99 3.39
 -10 -5 -4 7.37 2.95
 -10 5 -4 6.72 3.4
 -10 -5 -5 -2.6 2.93
 -10 5 -5 -2.31 4.91
 -10 5 -6 -0.64 2.99
 -10 -5 -6 -0.08 2.99
 -10 -5 -7 3.85 3.2
 -10 5 -7 3.31 3.27
 -10 -5 -8 5.18 3.25
 -10 5 -8 2.36 3.19
 -10 -5 -9 2.44 3.17
 -10 5 -9 -2.05 3.12
 -10 -5 -10 -2.7 3.4
 -10 5 -10 7.73 4.91
 -10 -5 -11 4.31 3.5
 -10 5 -11 -3.02 5.02
 -10 -5 -12 4.62 3.94
 -10 5 -12 7.01 3.47
 -10 -5 -13 9.42 3.81
 -10 5 -13 0.2 3.45
 -10 5 -14 -0.86 3.22
 -10 -5 -14 4.21 3.74
 -10 -5 -15 -2.44 3.71
 -10 5 -15 0.72 3.3
 -10 -5 -16 2.35 3.89
 -10 5 -16 -1.61 3.33
 -10 -5 -17 0.54 3.84
 -10 5 -17 2.91 3.32
 -10 5 -18 0.98 3.38
 -10 -5 -18 10.41 6.2
 -10 -5 -19 -0.06 5.87
 -10 5 -19 -1 3.28
 -10 -5 -20 7.31 4.31
 -10 5 -20 5.97 3.57
 -10 -5 -21 -2.39 3.99
 -10 5 -21 1.2 3.4
 -10 -5 -22 1.64 4.1
 -10 5 -22 1.37 3.35
 -10 -5 -23 2.54 4.35
 10 -6 -25 -4.34 3.87
 -10 6 25 4 7.45
 10 -6 -24 0.08 4.07
 -10 6 24 9.26 4.83
 10 -6 -23 5.5 3.96
 -10 6 23 -1.42 4.7
 10 -6 -22 -8.47 6.04
 -10 6 22 0.99 7.35
 10 -6 -21 4.71 3.8
 -10 6 21 1.48 4.56
 10 -6 -20 -0.93 3.7
 -10 6 20 5.13 4.28
 10 -6 -19 4.1 5.73
 -10 6 19 -4.78 6.32
 10 -6 -18 6.02 4.2
 -10 6 18 7.38 4.76
 10 -6 -17 -4.7 3.94
 -10 6 17 -0.38 4.42
 10 -6 -16 -0.52 4.04
 -10 6 16 0.02 6.49
 10 -6 -15 6.96 4.36
 -10 6 15 8.74 4.76
 10 -6 -14 7.46 4.12
 -10 6 14 2.27 4.44
 10 -6 -13 -6.67 4
 -10 6 13 2.15 4.22
 10 -6 -12 -1.28 4
 -10 6 12 6.46 4.01
 10 -6 -11 0.44 5.99
 -10 6 11 1.24 4.15
 10 -6 -10 9.6 4.35
 -10 -6 10 2.42 2.89
 -10 6 10 2.59 4.16
 10 -6 -9 0.52 4.23
 -10 -6 9 2.43 1.81
 -10 6 9 7.02 6.04
 10 -6 -8 11.97 6.74
 -10 -6 8 1.35 1.97
 -10 6 8 1.4 4
 10 -6 -7 1.02 4.68
 -10 -6 7 5.7 3.52
 -10 6 7 4.25 4.1
 10 -6 -6 7.47 4.64
 -10 -6 6 2.92 2.4
 -10 6 6 14.68 6.3
 -10 -6 5 -0.81 2.37
 -10 6 5 -2.87 3.77
 -10 -6 4 2.51 2.61
 -10 6 4 10.43 4
 -10 -6 3 -0.51 2.64
 -10 6 3 3.96 3.84
 -10 -6 2 3.36 4.19
 -10 6 2 -1.37 5.93
 -10 -6 1 5.05 4.25
 -10 6 1 2.92 3.84
 -10 -6 0 9.02 3.25
 -10 6 0 17.48 4.12
 -10 -6 -1 -0.53 2.84
 -10 6 -1 -0.47 3.54
 -10 -6 -2 6.19 3.18
 -10 6 -2 6.97 3.96
 -10 -6 -3 9.13 3.32
 -10 6 -3 7.56 6.1
 -10 -6 -4 0.69 3.09
 -10 6 -4 -1.79 3.69
 -10 -6 -5 12.14 3.63
 -10 6 -5 7.88 4.21
 -10 -6 -6 -1.8 3.2
 -10 6 -6 0.39 3.68
 -10 -6 -7 3.59 3.49
 -10 6 -7 1.12 3.78
 -10 -6 -8 1.77 3.39
 -10 6 -8 -3.19 5.89
 -10 -6 -9 5.21 3.6
 -10 6 -9 -0.52 5.84
 -10 -6 -10 4.29 3.53
 -10 6 -10 -2.1 3.8
 -10 -6 -11 4.82 3.8
 -10 6 -11 5.09 3.96
 -10 6 -12 1.33 3.98
 -10 -6 -12 12.74 6.13
 -10 -6 -13 -0.82 6.11
 -10 6 -13 1.54 3.77
 -10 -6 -14 5.48 6.29
 -10 6 -14 3.63 4.02
 -10 -6 -15 7.97 4.41
 -10 6 -15 3.34 4.07
 -10 6 -16 -1.47 3.85
 -10 -6 -16 -4.09 4.39
 -10 -6 -17 -3.44 4.27
 -10 6 -17 4.1 5.83
 -10 -6 -18 4.15 4.31
 -10 6 -18 1.27 6.04
 -10 -6 -19 -9.35 4.74
 -10 6 -19 1.93 6.26
 10 -7 -21 3.58 4.32
 -10 7 21 0.5 5.08
 10 -7 -20 6.25 6.61
 -10 7 20 -1.18 4.9
 10 -7 -19 4.04 4.39
 -10 7 19 2.43 4.9
 10 -7 -18 -3.08 4.45
 -10 7 18 -4.5 4.85
 10 -7 -17 -3.87 7.14
 -10 7 17 -7.02 7.52
 10 -7 -16 1.1 4.24
 -10 7 16 0.04 4.77
 10 -7 -15 2.34 4.29
 -10 7 15 -0.77 4.82
 10 -7 -14 18.4 4.89
 -10 7 14 2.43 5.3
 10 -7 -13 -13.29 4.69
 -10 7 13 6.28 7.73
 10 -7 -12 3.54 4.52
 -10 7 12 4.03 4.78
 10 -7 -11 8.27 4.8
 -10 7 11 5.32 4.92
 10 -7 -10 6.15 4.66
 -10 7 10 5.33 4.77
 10 -7 -9 -1.64 4.44
 -10 7 9 4.11 6.65
 10 -7 -8 4.36 4.92
 -10 7 8 3.5 4.53
 10 -7 -7 2.06 4.88
 -10 -7 7 1.8 2.62
 -10 7 7 -2.43 4.31
 10 -7 -6 0.38 5.17
 -10 -7 6 8.09 2.81
 -10 7 6 4.64 4.67
 -10 -7 5 7.21 4.65
 -10 7 5 11.19 7.07
 -10 -7 4 3.85 4.39
 -10 7 4 5.32 4.33
 -10 -7 3 0.77 2.88
 -10 7 3 2.23 4.17
 -10 -7 2 1.87 2.85
 -10 7 2 -7.35 4.14
 -10 -7 1 -0.4 3.04
 -10 7 1 6.18 6.5
 -10 7 0 1.18 4.16
 -10 -7 0 1.73 3.13
 -10 -7 -1 4.73 3.39
 -10 7 -1 -0.08 4.22
 -10 -7 -2 -0.05 3.36
 -10 7 -2 6.79 4.3
 -10 -7 -3 -5.39 3.46
 -10 7 -3 -3.46 4.33
 -10 -7 -4 -0.36 3.36
 -10 7 -4 2.76 4.25
 -10 -7 -5 -1.62 3.59
 -10 -7 -6 0.37 3.49
 -10 7 -6 -1.56 4.05
 -10 -7 -7 2.93 3.5
 -10 7 -7 -3.65 4.06
 -10 -7 -8 1.35 3.67
 -10 7 -8 0.38 4.08
 -10 -7 -9 1.09 3.85
 -10 7 -9 -5.65 4.22
 -10 -7 -10 0.78 3.94
 -10 7 -10 6.93 4.38
 -10 -7 -11 0.65 3.86
 -10 7 -11 -0.65 4.01
 -10 -7 -12 0.64 4.16
 -10 7 -12 5.65 4.41
 -10 -7 -13 0.36 4.06
 -10 7 -13 0.48 6.56
 -10 -7 -14 1.44 4.28
 -10 7 -14 3.28 6.72
 -10 -7 -15 6.32 6.94
 -10 7 -15 0.9 6.82
 10 -8 -15 -18.25 7.88
 -10 8 15 1.04 5.26
 10 -8 -14 3.2 5.07
 -10 8 14 8.37 8.41
 10 -8 -13 0.04 4.71
 -10 8 13 2.48 5.28
 10 -8 -12 25.31 8.15
 -10 8 12 1.47 5.61
 10 -8 -11 -1.36 5.06
 -10 8 11 8.03 5.23
 10 -8 -10 -0.4 4.86
 -10 8 10 -2.37 7.87
 10 -8 -9 3.84 5.03
 -10 8 9 -0.7 4.89
 10 -8 -8 6.85 5.58
 -10 8 8 4.77 5.38
 10 -8 -7 -0.39 5.17
 -10 8 7 -2.71 4.91
 10 -8 -6 3.08 4.99
 -10 8 6 -1.56 4.93
 -10 8 5 1.07 7.52
 -10 8 4 -0.37 4.7
 -10 -8 3 -0.36 3.31
 -10 8 3 -0.22 4.65
 -10 -8 2 1.9 3.35
 -10 8 2 -0.27 4.72
 -10 -8 1 5.55 3.63
 -10 8 1 4.52 4.88
 -10 -8 0 3.53 3.5
 -10 8 0 -2.54 7.4
 -10 -8 -1 0.94 3.72
 -10 8 -1 8.3 7.43
 -10 -8 -2 1.45 3.69
 -10 8 -2 6.01 4.82
 -10 -8 -3 0.62 3.72
 -10 8 -3 -2.3 4.73
 -10 -8 -4 6.66 3.88
 -10 8 -4 1.43 4.96
 -10 -8 -5 -2.29 3.84
 -10 8 -5 2.46 4.63
 -10 -8 -6 3.65 4.04
 -10 8 -6 -0.92 4.96
 -10 -8 -7 2.33 4.13
 -10 8 -7 0.81 7.64
 -10 -8 -8 6.12 4.34
 -10 8 -8 5.65 8.03
 -10 -8 -9 2.07 4.22
 -10 8 -9 -0.92 4.84
 11 0 -33 -0.55 3.89
 11 0 -32 0.75 3.78
 11 0 -31 2.15 3.63
 11 0 -30 1.91 3.54
 11 0 -29 -5.05 5.47
 11 0 -28 -0.5 3.29
 11 0 -27 0.47 3.17
 11 0 -26 3.5 3.32
 11 0 -25 -3.37 4.96
 11 0 -24 4.84 3.19
 11 0 -23 6.61 2.87
 -11 0 23 3.1 1.8
 11 0 -22 4.12 2.93
 -11 0 22 4.04 1.94
 11 0 -21 0.76 2.56
 -11 0 21 0.15 1.79
 11 0 -20 7.73 2.78
 -11 0 20 9.23 2.03
 11 0 -19 -0.25 2.22
 -11 0 19 1.58 2.64
 11 0 -18 4.52 2.29
 -11 0 18 4.47 2.82
 11 0 -17 -2.05 2.16
 11 0 -16 9.45 3.28
 -11 0 16 4.07 2.83
 11 0 -15 1.82 1.87
 -11 0 15 0.53 1.68
 11 0 -14 16.31 2.14
 -11 0 14 14.94 2.04
 -11 0 13 2.11 1.57
 11 0 -12 11.4 2.85
 -11 0 12 6.76 1.69
 11 0 -11 0.89 1.6
 -11 0 11 1.47 2.33
 11 0 -10 4.04 1.57
 -11 0 10 5.37 1.5
 11 0 -9 0.86 1.46
 -11 0 9 0.35 1.38
 11 0 -8 3.12 1.47
 -11 0 8 3.63 2.24
 11 0 -7 -1.88 1.3
 -11 0 7 0.64 1.36
 11 0 -6 8.09 1.37
 -11 0 6 6.68 1.47
 11 0 -5 -0.14 1.79
 -11 0 5 0.3 1.35
 11 0 -4 91.77 3.2
 -11 0 4 86.58 3.51
 11 0 -3 -1.01 1.14
 -11 0 3 0.32 1.34
 11 0 -2 18.25 1.45
 -11 0 2 20.01 1.88
 11 0 -1 0.99 1.13
 -11 0 1 4.01 1.59
 11 0 0 2.7 1.04
 -11 0 0 2.57 2.28
 11 0 1 0.83 0.98
 -11 0 -1 1.55 1.58
 11 0 2 36.84 2.18
 -11 0 -2 30.37 2.51
 11 0 3 0.45 0.9
 -11 0 -3 1.05 2.51
 11 0 4 1.89 1.39
 -11 0 -4 6.41 1.89
 11 0 5 -1.44 0.87
 -11 0 -5 -0.22 1.88
 11 0 6 12.71 1.04
 -11 0 -6 11.63 2.27
 11 0 7 1.27 1.29
 -11 0 -7 4.4 2.03
 11 0 8 16.82 1.07
 -11 0 -8 17.36 3.8
 11 0 9 -0.65 1.22
 -11 0 -9 3.55 3.07
 11 0 10 1.48 0.76
 -11 0 -10 3.74 2.04
 11 0 11 -0.39 1.13
 -11 0 -11 -0.01 2.12
 11 0 12 5.61 0.83
 -11 0 -12 5.51 2.4
 11 0 13 0.52 1.13
 -11 0 -13 3.38 2.31
 -11 0 -14 5.81 2.5
 -11 0 -15 2.88 2.59
 -11 0 -16 1.51 2.56
 -11 0 -17 1.32 2.71
 -11 0 -18 3.28 2.87
 -11 0 -19 0.73 2.9
 -11 0 -20 -1.81 2.93
 -11 0 -21 -0.29 2.86
 -11 0 -22 1.71 3.08
 -11 0 -23 0.78 3.15
 -11 0 -24 2.02 3.15
 -11 0 -25 -4.14 5.22
 -11 0 -26 1.61 5.11
 -11 0 -27 2.57 5.53
 11 -1 -34 7.94 6.99
 11 -1 -33 -4.55 4.06
 11 -1 -32 -5.23 3.98
 11 -1 -31 5.62 3.85
 11 -1 -30 -3.29 5.55
 11 -1 -29 5.52 3.58
 11 1 -28 2.97 3.46
 11 -1 -28 -1.2 3.27
 11 -1 -27 7.27 3.58
 11 1 -27 4.14 3.5
 11 1 -26 2.92 3.28
 11 -1 -26 -0.11 5.01
 -11 1 26 3.03 3.75
 11 1 -25 2.64 3.05
 11 -1 -25 0.68 3.16
 -11 1 25 4.72 2.31
 11 1 -24 2.41 3.09
 11 -1 -24 1.07 2.98
 -11 1 24 2.1 2.31
 11 -1 -23 2.98 2.92
 11 1 -23 3.82 2.95
 -11 1 23 1.97 3.85
 11 1 -22 -1.37 4.3
 11 -1 -22 3.47 2.79
 -11 1 22 4.45 2.43
 11 1 -21 42.59 4.03
 11 -1 -21 40.91 4.14
 -11 -1 21 41.28 2.24
 -11 1 21 34.93 3.92
 11 1 -20 4.52 2.45
 11 -1 -20 -3.03 2.48
 -11 -1 20 0.21 1.95
 -11 1 20 4.78 2.35
 11 -1 -19 10.6 4.48
 11 1 -19 19.17 3
 -11 -1 19 18.06 2.59
 -11 1 19 16.67 4.22
 11 -1 -18 10.79 2.53
 11 1 -18 10.12 2.52
 -11 -1 18 6.35 1.55
 -11 1 18 8.58 2.44
 11 1 -17 -0.23 1.01
 11 1 -17 -3.81 3.28
 11 -1 -17 4.62 2.16
 -11 -1 17 0.69 1.34
 -11 1 17 2.32 2.15
 11 1 -16 4.74 1.22
 11 1 -16 9.06 2.33
 11 -1 -16 9.88 2.37
 -11 -1 16 15.08 1.61
 -11 1 16 11.22 3.48
 11 1 -15 20.09 2.55
 11 -1 -15 18.52 2.6
 -11 -1 15 17.36 2.77
 -11 1 15 24.08 2.57
 11 1 -14 1.32 1.85
 11 -1 -14 0.61 1.97
 -11 -1 14 4.32 2.09
 -11 1 14 2.52 1.94
 11 -1 -13 1.49 1.84
 11 1 -13 4.02 1.82
 -11 -1 13 1.72 2.1
 -11 1 13 2.99 2.97
 11 1 -12 4.44 1.8
 11 -1 -12 3.25 1.97
 -11 1 12 8.38 2.01
 -11 -1 12 8.51 2.03
 11 1 -11 8.53 2.42
 11 -1 -11 1.06 1.81
 -11 -1 11 -0.32 1.27
 -11 1 11 1.84 1.77
 11 1 -10 8.17 2.29
 11 -1 -10 3.14 1.7
 -11 1 10 -0.32 2.63
 -11 -1 10 -0.25 1.25
 11 1 -9 -2.22 1.38
 11 -1 -9 4.19 1.62
 -11 -1 9 0.07 1.19
 -11 1 9 -1.69 1.64
 11 1 -8 0.25 1.38
 11 -1 -8 5.69 1.66
 -11 1 8 1.49 1.6
 -11 -1 8 1.86 1.19
 11 1 -7 5.03 1.36
 11 -1 -7 4.9 1.65
 -11 -1 7 4.56 1.27
 -11 1 7 3.98 1.7
 11 1 -6 -1.59 1.17
 11 -1 -6 1.05 1.47
 -11 -1 6 0.01 1.23
 -11 1 6 -0.72 1.58
 11 -1 -5 -0.23 1.46
 11 1 -5 2.05 1.15
 -11 -1 5 4.18 1.96
 -11 1 5 2.61 1.65
 11 1 -4 5.37 1.67
 11 -1 -4 0.55 2.11
 -11 1 4 1.33 1.67
 -11 -1 4 2.36 1.33
 11 -1 -3 3.25 1.4
 11 1 -3 2.55 1.56
 -11 -1 3 1.89 2.08
 -11 1 3 4.11 1.67
 11 1 -2 14.61 1.71
 11 -1 -2 13.75 1.56
 -11 1 2 12.07 1.89
 -11 -1 2 9.56 1.69
 11 1 -1 -1.64 1.35
 11 -1 -1 4.27 1.97
 -11 -1 1 1.18 1.13
 -11 -1 1 0.71 1.47
 -11 1 1 1.08 1.6
 11 -1 0 1.68 1.26
 11 1 0 -1.47 1.25
 -11 -1 0 -0.01 1.07
 -11 -1 0 0.56 2.3
 -11 1 0 1.47 2.44
 11 -1 1 0.14 1.96
 11 1 1 3.77 1.17
 -11 -1 -1 2.22 1.58
 -11 1 -1 -0.61 1.64
 11 1 2 0.94 1.09
 11 -1 2 1.44 1.28
 -11 -1 -2 4.44 1.61
 -11 1 -2 6.36 1.67
 11 -1 3 -4.18 1.86
 11 1 3 0.29 0.96
 -11 1 -3 -2.49 2.57
 -11 -1 -3 0.41 1.63
 11 1 4 0.75 0.91
 11 -1 4 4.61 1.29
 -11 -1 -4 4.71 2.62
 -11 1 -4 5.27 1.93
 11 -1 5 2.15 1.24
 11 1 5 1.26 0.49
 -11 1 -5 0.33 1.92
 -11 -1 -5 3.74 1.74
 11 1 6 1.3 0.59
 11 -1 6 0.39 1.29
 -11 -1 -6 -0.86 1.8
 -11 1 -6 2.43 1.93
 11 1 7 0.92 0.4
 11 -1 7 0.02 1.39
 -11 1 -7 1.76 3.08
 -11 -1 -7 0.52 1.95
 -11 -1 -8 4.5 2.18
 -11 1 -8 5.21 3.25
 -11 -1 -9 20.65 2.66
 -11 1 -9 20.73 2.71
 -11 1 -10 2.89 2.17
 -11 -1 -10 4.82 2.24
 -11 -1 -11 -0.87 2.3
 -11 1 -11 -1.81 2.21
 -11 -1 -12 20.98 4.43
 -11 1 -12 16.9 2.79
 -11 -1 -13 2.36 3.71
 -11 1 -13 1.42 2.34
 -11 1 -14 3.5 2.44
 -11 -1 -14 3.29 3.9
 -11 1 -15 0.28 2.5
 -11 -1 -15 6.52 4.01
 -11 -1 -16 6.15 4.15
 -11 1 -16 -1.81 2.58
 -11 -1 -17 4.12 4.32
 -11 1 -17 -1.22 4.07
 -11 1 -18 -4.71 4.3
 -11 -1 -18 0.12 2.97
 -11 1 -19 1.02 4.16
 -11 -1 -19 -1.79 3
 -11 -1 -20 11.38 3.43
 -11 1 -20 7.49 4.89
 -11 -1 -21 -2.28 3.12
 -11 1 -21 0.89 2.88
 -11 -1 -22 -3.1 3.32
 -11 1 -22 -1 2.97
 -11 1 -23 1.11 2.99
 -11 -1 -23 1.95 3.28
 -11 -1 -24 0.07 3.43
 -11 1 -24 0.3 3.01
 -11 -1 -25 2.02 3.41
 -11 1 -25 -0.31 3.16
 -11 -1 -26 0.22 3.63
 -11 1 -26 4.89 3.2
 -11 -1 -27 2.63 3.72
 -11 1 -27 1.56 3.36
 11 -2 -33 0.01 3.9
 11 -2 -32 7.13 4.07
 11 -2 -31 -1.27 3.7
 11 -2 -30 -2.72 5.69
 11 -2 -29 4.64 3.71
 11 -2 -28 -1.94 3.28
 -11 2 28 1.65 2.96
 11 -2 -27 -5.63 5.55
 -11 2 27 -9.06 4.91
 11 -2 -26 -4.24 3.25
 -11 2 26 3.19 2.87
 11 -2 -25 0.42 3.13
 -11 2 25 -2.97 4.6
 11 -2 -24 3.37 3.12
 -11 2 24 3.33 3
 11 -2 -23 3.25 2.96
 -11 2 23 0.39 2.96
 11 -2 -22 4.77 2.85
 -11 2 22 5.05 3.1
 11 -2 -21 8.77 2.9
 -11 2 21 3.29 3.05
 11 -2 -20 12.19 4.54
 -11 2 20 5.08 4.75
 11 -2 -19 4.41 2.46
 -11 2 19 0.89 2.73
 11 2 -18 2.01 2.42
 11 -2 -18 6.89 2.49
 -11 2 18 7.8 4.13
 11 2 -17 4.02 2.29
 11 -2 -17 -7.67 3.66
 -11 2 17 -0.96 2.57
 -11 -2 17 4.41 1.53
 11 2 -16 18.45 2.63
 11 -2 -16 16.49 2.86
 -11 -2 16 16.67 2.06
 -11 2 16 13.32 3.17
 11 2 -15 -0.94 2.03
 11 -2 -15 8.86 2.15
 11 2 -15 0.34 0.88
 -11 -2 15 0.09 1.09
 -11 2 15 2.94 2.42
 11 2 -14 5.65 2.07
 11 2 -14 2.3 1.05
 11 -2 -14 8.55 2.39
 -11 2 14 9.22 2.43
 -11 -2 14 8.35 1.19
 11 2 -13 -0.42 1.06
 11 2 -13 3.05 1.82
 11 -2 -13 2.32 2.14
 -11 -2 13 3.67 1.73
 -11 2 13 2.72 3.45
 11 2 -12 0.07 1.13
 11 2 -12 -0.71 1.73
 11 -2 -12 -2.73 2.03
 -11 -2 12 0.43 1.7
 -11 2 12 0.47 2.15
 11 2 -11 3.67 1.77
 11 -2 -11 7.92 2.01
 -11 2 11 2.79 3.36
 -11 -2 11 2.28 1.8
 11 2 -10 22.95 2.12
 11 -2 -10 24.12 2.5
 -11 -2 10 21.32 2.26
 -11 2 10 23.46 2.8
 11 2 -9 2.66 1.44
 11 -2 -9 -0.44 2.67
 -11 2 9 2.56 3.1
 -11 -2 9 -2.43 1.15
 11 2 -8 1.69 1.41
 11 -2 -8 -1.26 1.76
 -11 -2 8 0.28 1.15
 -11 2 8 3.14 1.97
 11 2 -7 8.82 1.47
 11 -2 -7 4.93 1.85
 -11 2 7 8.03 3.26
 -11 -2 7 5.16 2.12
 11 2 -6 4.53 1.29
 11 -2 -6 -1.57 2.72
 -11 -2 6 2.38 1.32
 -11 2 6 2.32 2.03
 11 2 -5 -1.09 1.21
 11 -2 -5 -0.84 1.68
 -11 -2 5 0.15 1.86
 -11 2 5 2.93 2.78
 11 2 -4 12.78 1.24
 11 -2 -4 7.41 2.84
 -11 -2 4 6.76 1.53
 -11 2 4 10 2.01
 11 2 -3 29.96 1.63
 11 -2 -3 36.68 2.44
 -11 2 3 31.25 2.8
 -11 -2 3 41.27 3.1
 11 2 -2 -0.44 0.99
 11 -2 -2 -1.69 1.58
 -11 -2 2 1.92 1.43
 -11 -2 2 1.49 1.72
 -11 2 2 -1.71 1.88
 11 -2 -1 4.75 1.8
 -11 -2 1 5.52 1.13
 -11 -2 1 4.6 1.58
 -11 2 1 4.22 1.99
 11 -2 0 1.36 1.67
 -11 -2 0 -0.73 0.98
 -11 -2 0 3.05 2.3
 -11 2 0 2.64 2.94
 11 -2 1 7.21 3.01
 -11 -2 -1 5.69 0.97
 -11 -2 -1 8.99 1.81
 -11 2 -1 5.46 2.13
 11 -2 2 2.16 1.9
 -11 -2 -2 2.42 1.75
 -11 -2 -2 0.98 0.8
 -11 2 -2 2.63 2.04
 11 -2 3 0.26 1.96
 -11 -2 -3 1.4 1.74
 -11 2 -3 -2.29 3.12
 -11 -2 -4 2.33 1.98
 -11 2 -4 3.11 2.03
 -11 -2 -5 -3.65 1.96
 -11 2 -5 1.13 2.06
 -11 -2 -6 3.01 3.26
 -11 2 -6 4.41 2.18
 -11 2 -7 5.59 3.25
 -11 -2 -7 -3.94 3.23
 -11 -2 -8 2.21 2.23
 -11 2 -8 0.56 2.06
 -11 -2 -9 13.57 2.72
 -11 2 -9 14.31 2.56
 -11 -2 -10 -1.48 2.45
 -11 2 -10 -1.92 2.22
 -11 2 -11 7.5 2.49
 -11 -2 -11 8.9 2.74
 -11 -2 -12 4.49 2.82
 -11 2 -12 7.4 2.45
 -11 -2 -13 8.79 2.78
 -11 2 -13 2.75 2.55
 -11 -2 -14 0.58 2.79
 -11 2 -14 1.41 3.81
 -11 2 -15 -0.7 4.22
 -11 -2 -15 4.46 2.93
 -11 -2 -16 -0.14 2.89
 -11 2 -16 -1.73 2.7
 -11 -2 -17 3.95 3.17
 -11 2 -17 3.07 2.9
 -11 -2 -18 -5.88 4.76
 -11 2 -18 3.61 2.87
 -11 -2 -19 -0.04 5.04
 -11 2 -19 3.42 2.97
 -11 -2 -20 0.34 5.27
 -11 2 -20 1.89 3.01
 -11 -2 -21 -2.13 3.38
 -11 2 -21 -0.16 2.92
 -11 -2 -22 1.2 3.37
 -11 2 -22 -0.4 3.01
 -11 2 -23 2.6 3.15
 -11 -2 -23 7.45 3.7
 -11 -2 -24 3.75 3.6
 -11 2 -24 -0.11 3.16
 -11 -2 -25 0.34 3.74
 -11 2 -25 -3.68 4.8
 -11 -2 -26 1.34 3.8
 -11 2 -26 -2.35 4.78
 -11 2 -26 4.34 4.89
 11 -3 -32 0.96 3.97
 11 -3 -31 9.41 4.26
 11 -3 -30 -0.86 5.52
 11 -3 -29 0.91 3.54
 -11 3 29 1.51 3.61
 11 -3 -28 1.31 3.62
 -11 3 28 7.82 3.66
 11 -3 -27 3.65 5.21
 -11 3 27 -4.62 5.3
 11 -3 -26 -0.42 3.22
 -11 3 26 2.56 3.48
 11 -3 -25 -0.04 3.13
 -11 3 25 6.18 5.28
 11 -3 -24 2 4.99
 -11 3 24 6.17 3.61
 11 -3 -23 -0.95 2.97
 -11 3 23 4.89 5.28
 11 -3 -22 10.22 3.12
 -11 3 22 0.12 3.6
 11 -3 -21 14.2 4.75
 -11 3 21 -1.67 5.65
 11 -3 -20 4.53 3.11
 -11 3 20 5.51 3.56
 11 -3 -19 -1.11 2.7
 -11 3 19 5.74 4.79
 11 -3 -18 -4.4 4.14
 -11 3 18 5.51 3.12
 11 -3 -17 -0.09 2.68
 -11 3 17 2.18 4.61
 11 -3 -16 -0.75 2.56
 -11 3 16 -2.11 2.88
 -11 -3 16 1.12 1.15
 11 -3 -15 -5.62 3.82
 -11 -3 15 -0.55 1.26
 -11 3 15 7.91 4.21
 11 -3 -14 8.35 2.44
 -11 -3 14 3.62 0.99
 -11 3 14 3.14 2.85
 11 -3 -13 -1.3 2.34
 -11 -3 13 -0.34 0.91
 -11 3 13 2.84 4.11
 -11 -3 13 -0.53 1.5
 11 -3 -12 0.11 2.29
 -11 -3 12 -0.73 1.05
 -11 -3 12 0.59 0.97
 -11 3 12 4.2 2.62
 11 -3 -11 8.08 2.39
 -11 -3 11 5.28 1.09
 -11 3 11 5.39 2.78
 11 -3 -10 -1.26 3.61
 -11 -3 10 2.98 1.84
 -11 3 10 5.31 2.63
 11 -3 -9 1 2.25
 -11 -3 9 1.97 1.78
 -11 3 9 -2.91 2.35
 11 -3 -8 28.37 3.18
 -11 -3 8 28.79 1.78
 -11 3 8 28.94 3.51
 11 -3 -7 10.06 3.61
 -11 -3 7 1.97 2.06
 -11 3 7 9.1 2.57
 11 -3 -6 23.44 2.68
 -11 3 6 10.89 4.43
 -11 -3 6 13.82 1.7
 11 -3 -5 4.03 2.17
 -11 -3 5 0.78 2.24
 -11 3 5 -0.35 2.24
 11 -3 -4 -1.46 2.29
 -11 -3 4 0.01 1.53
 -11 3 4 3.18 2.31
 11 -3 -3 -1.53 2.3
 -11 -3 3 2.66 1.58
 -11 3 3 -1.93 2.27
 11 -3 -2 6.76 3.72
 -11 -3 2 2.51 2.52
 -11 3 2 -1 2.29
 11 -3 -1 -1.26 2.58
 -11 -3 1 0.93 0.98
 -11 -3 1 2.23 1.73
 -11 3 1 2.46 2.29
 11 -3 0 3.79 2.8
 -11 -3 0 2.7 1.89
 -11 3 0 3.23 2.38
 -11 -3 0 6.67 1.49
 -11 -3 -1 2.58 1.35
 -11 -3 -1 4.91 1.89
 -11 3 -1 3.68 2.37
 -11 -3 -2 3.44 0.87
 -11 -3 -2 8.35 1.98
 -11 3 -2 4.62 2.42
 -11 -3 -3 3.96 1.08
 -11 -3 -3 4.53 3.37
 -11 3 -3 4.99 2.3
 -11 -3 -4 3.76 0.54
 -11 -3 -4 0.54 2.25
 -11 3 -4 3.72 2.35
 -11 -3 -5 0.46 2.28
 -11 3 -5 5.5 2.38
 -11 -3 -6 19.33 2.82
 -11 3 -6 15.21 2.93
 -11 -3 -7 0.66 2.46
 -11 3 -7 4.77 3.69
 -11 -3 -8 4.08 2.71
 -11 3 -8 4.11 2.55
 -11 -3 -9 2.07 2.62
 -11 3 -9 -0.89 2.43
 -11 -3 -10 3.52 2.86
 -11 3 -10 6.74 2.71
 -11 -3 -11 4.48 3.01
 -11 3 -11 7.69 2.89
 -11 -3 -12 4.01 3.17
 -11 3 -12 9.57 4.52
 -11 -3 -13 7.27 3.45
 -11 3 -13 7.3 4.46
 -11 -3 -14 13.18 3.79
 -11 3 -14 13.99 4.98
 -11 -3 -15 3.5 3.44
 -11 3 -15 6.84 2.98
 -11 -3 -16 -6.18 3.34
 -11 3 -16 1.12 2.94
 -11 -3 -17 3.23 3.51
 -11 3 -17 -0.65 2.82
 -11 -3 -18 1.19 5.41
 -11 3 -18 1.37 2.88
 -11 -3 -19 0.01 5.45
 -11 3 -19 0.79 3.01
 -11 -3 -20 2.99 5.16
 -11 3 -20 -1.8 2.91
 -11 -3 -21 4.19 3.53
 -11 3 -21 0.59 3.15
 -11 -3 -22 -1.97 3.6
 -11 3 -22 0.12 3.05
 -11 -3 -23 3.06 3.66
 -11 3 -23 1.53 3.07
 -11 -3 -24 -2.54 3.69
 -11 3 -24 2.22 3.08
 -11 -3 -25 -1.16 4.08
 -11 3 -25 -5.11 3.29
 11 -4 -30 3.57 3.78
 -11 4 30 0.49 4.16
 11 -4 -29 10.89 3.99
 -11 4 29 0.36 4.48
 11 -4 -28 -7.07 3.79
 -11 4 28 -0.58 4.26
 11 -4 -27 -0.48 3.41
 -11 4 27 -0.08 5.96
 11 -4 -26 -1.98 3.43
 -11 4 26 -3.77 4.02
 11 -4 -25 -3.42 3.35
 -11 4 25 0.26 6.2
 11 -4 -24 6.19 3.39
 -11 4 24 5.4 4.07
 11 -4 -23 3.77 3.25
 -11 4 23 -3.13 3.77
 11 -4 -22 0.54 3.2
 -11 4 22 0.36 3.88
 11 -4 -21 -2.29 5.04
 -11 4 21 0.05 3.73
 11 -4 -20 5.13 3.42
 -11 4 20 1.78 6.37
 11 -4 -19 10.04 3.44
 -11 4 19 5.67 4.09
 11 -4 -18 -5.73 4.59
 -11 4 18 8.33 5.49
 11 -4 -17 14.9 3.55
 -11 4 17 13.73 4.18
 11 -4 -16 -7.36 3.11
 -11 4 16 1.34 3.59
 11 -4 -15 11.09 4.83
 -11 4 15 1.92 3.56
 11 -4 -14 -1.39 2.95
 -11 -4 14 3.32 1.24
 -11 4 14 2.79 3.32
 11 -4 -13 -6.95 2.81
 -11 -4 13 0.63 0.87
 -11 4 13 10.53 4.83
 11 -4 -12 -0.82 2.89
 -11 -4 12 1.13 1.04
 -11 4 12 -1.11 3.11
 11 -4 -11 1.44 2.93
 -11 -4 11 3.82 1.17
 -11 4 11 1.51 3.3
 11 -4 -10 3.34 2.88
 -11 -4 10 -1.02 1.8
 -11 4 10 -1.89 2.89
 11 -4 -9 13.21 3.16
 -11 -4 9 7.02 1.48
 -11 4 9 6.91 3.1
 11 -4 -8 7.1 2.96
 -11 -4 8 3.22 1.5
 -11 4 8 4.99 4.6
 11 -4 -7 0.22 4.34
 -11 -4 7 -0.28 1.53
 -11 4 7 0.44 2.85
 11 -4 -6 6.97 3.06
 -11 -4 6 2.39 1.64
 -11 4 6 0.77 2.99
 11 -4 -5 -0.66 3.11
 -11 -4 5 2.45 1.69
 -11 4 5 1.94 4.35
 11 -4 -4 3.63 2.99
 -11 -4 4 -1.11 2.63
 -11 4 4 0.06 2.85
 11 -4 -3 4.89 3.6
 -11 -4 3 7.47 2.05
 -11 4 3 8.43 3.09
 11 -4 -2 2.53 3.37
 -11 -4 2 1.05 2.04
 -11 4 2 0.56 4.25
 -11 -4 1 7.48 2.25
 -11 4 1 8.43 2.96
 -11 -4 0 2.06 2.17
 -11 4 0 0.07 2.71
 -11 -4 -1 10.37 3.89
 -11 4 -1 12.95 3.17
 -11 -4 -2 5.5 3.79
 -11 4 -2 11.08 3.07
 -11 -4 -3 0.49 2.25
 -11 4 -3 0.29 2.7
 -11 -4 -4 6.92 2.62
 -11 4 -4 13.06 3.01
 -11 -4 -5 -0.05 2.49
 -11 4 -5 -3.32 2.79
 -11 -4 -6 2.09 2.53
 -11 4 -6 3.74 4.24
 -11 -4 -7 5.93 2.8
 -11 4 -7 2.23 2.9
 -11 -4 -8 8.43 2.84
 -11 4 -8 4.83 3.05
 -11 -4 -9 2.49 2.95
 -11 4 -9 4.48 3.03
 -11 -4 -10 -2.6 3.08
 -11 4 -10 -4.89 3.02
 -11 -4 -11 3.4 3.11
 -11 4 -11 3.62 4.7
 -11 4 -12 6.79 4.76
 -11 -4 -12 0.02 3.09
 -11 -4 -13 0.94 3.25
 -11 4 -13 1.42 3.06
 -11 -4 -14 8.45 3.56
 -11 4 -14 3.29 3.34
 -11 -4 -15 -7.93 3.58
 -11 4 -15 1.87 3.08
 -11 4 -16 0.52 3.14
 -11 -4 -16 0.57 5.39
 -11 -4 -17 0.12 5.62
 -11 4 -17 4.33 3.26
 -11 -4 -18 -1.78 3.79
 -11 4 -18 -2.55 3.2
 -11 -4 -19 3.32 3.84
 -11 4 -19 0.91 3.08
 -11 4 -20 1.73 3.33
 -11 -4 -20 6.63 3.93
 -11 -4 -21 1.75 3.85
 -11 4 -21 -0.08 3.31
 -11 -4 -22 4.12 4.13
 -11 4 -22 0.79 3.21
 -11 -4 -23 -5.68 4.28
 -11 4 -23 -0.72 3.36
 -11 -4 -24 -5.1 4.35
 -11 4 -24 -0.25 3.4
 11 -5 -28 -5.04 3.85
 -11 5 28 2.38 4.5
 11 -5 -27 -4.05 3.84
 -11 5 27 -4.35 7.24
 11 -5 -26 5.8 5.51
 -11 5 26 -3.44 4.36
 11 -5 -25 -0.37 3.69
 -11 5 25 -0.48 4.32
 11 -5 -24 -0.75 3.5
 -11 5 24 1.33 6.68
 11 -5 -23 1.89 5.78
 -11 5 23 3.23 4.34
 11 -5 -22 6.35 3.76
 -11 5 22 1.63 4.31
 11 -5 -21 5.3 3.82
 -11 5 21 6.72 4.62
 11 -5 -20 -2.97 5.61
 -11 5 20 4.79 4.16
 11 -5 -19 -1.94 3.57
 -11 5 19 2.28 6.43
 11 -5 -18 13.71 3.95
 -11 5 18 6.64 4.83
 11 -5 -17 21.14 6.13
 -11 5 17 6.86 4.87
 11 -5 -16 -7.08 3.69
 -11 5 16 7.36 6.35
 11 -5 -15 -6.34 3.48
 -11 5 15 6.91 3.82
 11 -5 -14 9.66 4.33
 -11 5 14 16.62 4.41
 11 -5 -13 1.33 3.56
 -11 5 13 -2.74 3.7
 11 -5 -12 9.01 3.76
 -11 5 12 -0.55 3.75
 11 -5 -11 0.86 3.77
 -11 -5 11 6.15 2.19
 -11 5 11 9.14 3.89
 11 -5 -10 6.71 3.47
 -11 -5 10 -0.21 1.42
 -11 5 10 -2.33 3.62
 11 -5 -9 13.32 5.67
 -11 -5 9 1.79 1.54
 -11 5 9 2.06 3.61
 11 -5 -8 11.47 4.12
 -11 5 8 10.41 3.86
 -11 -5 8 6.31 1.92
 11 -5 -7 -1.96 3.73
 -11 -5 7 3.71 2.98
 -11 5 7 1.27 5.22
 11 -5 -6 5.5 5.94
 -11 -5 6 1.98 2.08
 -11 5 6 0.37 3.44
 11 -5 -5 -7.28 3.92
 -11 -5 5 1.02 1.99
 -11 5 5 0.46 3.27
 11 -5 -4 2.84 3.99
 -11 5 4 -4.72 4.94
 -11 -5 4 0.92 3.25
 -11 -5 3 0.35 2.12
 -11 5 3 -3.67 3.26
 -11 -5 2 8.17 2.49
 -11 5 2 5.85 3.6
 -11 -5 1 3.88 2.35
 -11 5 1 -2.7 3.34
 -11 5 0 1.51 5.03
 -11 -5 0 1.34 2.47
 -11 -5 -1 4.74 2.6
 -11 5 -1 2.39 3.32
 -11 -5 -2 -0.05 4.11
 -11 5 -2 4.16 3.34
 -11 -5 -3 1.7 4.22
 -11 5 -3 2.48 3.48
 -11 -5 -4 4.34 4.73
 -11 5 -4 0.59 5.16
 -11 -5 -5 9.85 5.63
 -11 5 -5 18.76 3.9
 -11 -5 -6 14.46 5.43
 -11 5 -6 6.34 3.73
 -11 -5 -7 21.77 5.51
 -11 5 -7 4.06 3.79
 -11 -5 -8 2.76 5.31
 -11 5 -8 2.58 3.54
 -11 -5 -9 4.11 5.58
 -11 5 -9 6.25 5.58
 -11 -5 -10 1.32 5.26
 -11 5 -10 -0.1 5.24
 -11 -5 -11 -3.68 5.32
 -11 5 -11 1.64 3.34
 -11 -5 -12 -1.44 5.3
 -11 5 -12 -2.48 3.39
 -11 -5 -13 8.39 5.64
 -11 5 -13 4.96 3.75
 -11 -5 -14 0.04 3.49
 -11 5 -14 0.97 3.4
 -11 -5 -15 1.75 3.75
 -11 5 -15 2.8 3.61
 -11 -5 -16 -0.75 3.65
 -11 5 -16 -3.16 3.59
 -11 -5 -17 1.44 3.73
 -11 5 -17 -4.43 3.5
 -11 -5 -18 -3.54 3.77
 -11 5 -18 1.68 3.49
 -11 -5 -19 -5.52 3.95
 -11 5 -19 4.45 5.56
 -11 -5 -20 1.76 4.18
 -11 5 -20 7.74 5.88
 -11 -5 -21 1.75 4.06
 -11 5 -21 -2.66 5.49
 11 -6 -25 3.53 4.2
 -11 6 25 4.66 5.09
 11 -6 -24 -2.74 4.05
 -11 6 24 4.36 4.76
 11 -6 -23 1.78 4.05
 -11 6 23 -10.26 7.21
 11 -6 -22 1.79 3.96
 -11 6 22 -1.23 4.54
 11 -6 -21 -0.07 3.81
 -11 6 21 0.09 4.4
 11 -6 -20 -1.25 3.81
 -11 6 20 3.32 7.12
 11 -6 -19 -4.84 5.78
 -11 6 19 3.29 4.37
 11 -6 -18 0.95 4.03
 -11 6 18 4.74 4.64
 11 -6 -17 2.01 3.97
 -11 6 17 4.63 7.19
 11 -6 -16 7.96 6.36
 -11 6 16 1.85 4.72
 11 -6 -15 -11.97 4.34
 -11 6 15 6.53 4.64
 11 -6 -14 -2.39 4.23
 -11 6 14 -2.95 7.02
 11 -6 -13 14 6.72
 -11 6 13 1.69 4.56
 11 -6 -12 -3.72 4.1
 -11 6 12 1.3 4.22
 11 -6 -11 8.98 4.48
 -11 6 11 2.79 4.49
 11 -6 -10 7.04 6.92
 -11 6 10 1.14 4.28
 11 -6 -9 -1.03 4.43
 -11 -6 9 1.96 1.95
 -11 6 9 5.12 4.21
 11 -6 -8 10.34 4.37
 -11 -6 8 -0.3 2.04
 -11 6 8 1.16 4.07
 11 -6 -7 9.37 7.05
 -11 6 7 -1.84 6.04
 -11 -6 7 -1.93 3.23
 11 -6 -6 -3.7 4.63
 -11 -6 6 -1.48 2.13
 -11 6 6 1.63 3.88
 11 -6 -5 9 4.7
 -11 -6 5 -0.66 2.35
 -11 6 5 3.79 4.11
 11 -6 -4 2.48 7.04
 -11 -6 4 -1.06 2.41
 -11 6 4 1.79 3.91
 -11 6 3 -14.57 6.04
 -11 -6 3 9.67 3.97
 -11 -6 2 7.29 4.59
 -11 6 2 4.47 4.05
 -11 -6 1 1.11 2.89
 -11 6 1 -2.33 3.78
 -11 -6 0 7.28 3.42
 -11 6 0 14.4 4.32
 -11 6 -1 -1.96 6.11
 -11 -6 -1 3.71 3.13
 -11 -6 -2 -0.12 3.09
 -11 6 -2 3.21 3.8
 -11 -6 -3 -1.56 3.24
 -11 6 -3 -0.2 3.87
 -11 -6 -4 -0.18 3.31
 -11 6 -4 1.18 3.89
 -11 -6 -5 2.96 3.57
 -11 6 -5 8.42 4.02
 -11 -6 -6 -2.89 3.51
 -11 6 -6 5.73 3.89
 -11 -6 -7 0.67 3.65
 -11 6 -7 9.29 6.15
 -11 -6 -8 0.95 3.79
 -11 6 -8 5.21 4.04
 -11 6 -9 2.03 3.93
 -11 -6 -9 -0.32 3.79
 -11 -6 -10 1.26 3.84
 -11 6 -10 1.71 3.89
 -11 -6 -11 4.67 4
 -11 6 -11 3.41 4.1
 -11 -6 -12 -5.19 4.01
 -11 6 -12 0.07 4.08
 -11 6 -13 0.08 3.97
 -11 -6 -13 1.79 3.99
 -11 -6 -14 8.38 4.45
 -11 6 -14 8.5 6.83
 -11 -6 -15 2.48 4.39
 -11 6 -15 8.36 6.52
 -11 -6 -16 -1.18 4.39
 -11 6 -16 7.08 5.78
 -11 6 -17 3.67 6.16
 -11 -6 -17 2.63 7.19
 -11 -6 -18 4.11 6.38
 -11 6 -18 -2.17 6.07
 11 -7 -20 -5.75 6.84
 -11 7 20 -0.9 5.12
 11 -7 -19 -6.25 4.44
 -11 7 19 6.21 5.07
 11 -7 -18 3.28 4.64
 -11 7 18 -0.21 8.07
 11 -7 -17 0.59 7.03
 -11 7 17 1.99 5.14
 11 -7 -16 -1.37 4.62
 -11 7 16 0.34 4.82
 11 -7 -15 2.37 4.64
 -11 7 15 -7.89 7.33
 11 -7 -14 9.22 8.03
 -11 7 14 13.55 5.64
 11 -7 -13 12.18 4.82
 -11 7 13 0.06 5.13
 11 -7 -12 -6.05 4.71
 -11 7 12 -0.4 4.85
 11 -7 -11 -3.24 7.5
 -11 7 11 -7.2 7.64
 11 -7 -10 -10.45 4.98
 -11 7 10 2.02 4.64
 11 -7 -9 -4.52 4.88
 -11 7 9 -0.19 4.54
 11 -7 -8 3.07 4.81
 -11 7 8 -0.15 4.35
 11 -7 -7 0.71 5
 -11 7 7 4.26 6.81
 11 -7 -6 4.12 5.41
 -11 -7 6 8.08 4.35
 -11 7 6 6.39 4.64
 11 -7 -5 -5.02 4.86
 -11 -7 5 0.11 4.42
 -11 7 5 -0.86 4.42
 -11 -7 4 1.89 3.04
 -11 7 4 8.26 4.43
 -11 -7 3 3.92 3.2
 -11 7 3 3.34 4.68
 -11 -7 2 0.66 3
 -11 7 2 -2.78 6.51
 -11 -7 1 0.14 3.18
 -11 7 1 -2.81 4.33
 -11 7 0 -1.96 4.37
 -11 -7 0 -0.19 3.29
 -11 -7 -1 -5.94 3.56
 -11 7 -1 -0.63 4.39
 -11 -7 -2 3.17 3.52
 -11 7 -2 1.91 4.46
 -11 -7 -3 4.75 5.77
 -11 7 -4 -0.29 4.17
 -11 -7 -4 -0.29 5.7
 -11 -7 -5 -1.64 5.9
 -11 7 -5 -3.91 4.32
 -11 -7 -6 1.34 6.25
 -11 7 -6 4.57 4.34
 -11 -7 -7 1 5.94
 -11 7 -7 -2.14 4.34
 -11 -7 -8 -1.11 6.11
 -11 7 -8 2.19 4.32
 -11 -7 -9 5.19 4.29
 -11 7 -9 2.84 4.51
 -11 -7 -10 6.44 4.44
 -11 7 -10 0.25 7.01
 -11 -7 -11 -3.34 4.51
 -11 7 -11 -7.15 7.04
 -11 -7 -12 3.67 4.27
 -11 7 -12 -7.82 6.54
 -11 -7 -13 1.01 4.4
 -11 7 -13 -0.91 4.33
 11 -8 -12 3.16 4.97
 -11 8 12 2.15 5.16
 11 -8 -11 10.78 8.52
 -11 8 11 1.44 8.74
 11 -8 -10 -1.26 5.25
 -11 8 10 -1.07 5.29
 11 -8 -9 -0.12 5.11
 -11 8 9 0.04 5.13
 11 -8 -8 0.77 8.77
 -11 8 8 10.66 5.72
 11 -8 -7 8.83 5.66
 -11 8 7 -2.09 8.34
 11 -8 -6 0.28 5.3
 -11 8 6 2.64 4.94
 11 -8 -5 7.91 5.55
 -11 8 5 -0.07 5.11
 -11 8 4 0.11 4.77
 -11 -8 3 3.09 3.71
 -11 8 3 2.06 5
 -11 -8 2 3.34 3.78
 -11 8 2 1.66 7.6
 -11 -8 1 -0.17 3.69
 -11 8 1 11.5 7.68
 -11 -8 0 4.24 6.17
 -11 8 0 7.69 5.36
 -11 -8 -1 -0.8 5.99
 -11 8 -1 -1.89 4.92
 -11 -8 -2 9.46 5.85
 -11 8 -2 -4.4 4.9
 -11 -8 -3 4.64 6.05
 -11 8 -3 0.96 4.91
 -11 -8 -4 -0.47 5.94
 -11 8 -4 2.82 4.88
 -11 -8 -5 7.55 6.75
 -11 8 -5 5.45 8.4
 -11 -8 -6 6.11 6.48
 -11 8 -6 -1 7.97
 12 0 -33 0.95 3.99
 12 0 -32 5.09 4.1
 12 0 -31 -6.2 4.01
 12 0 -30 -5.2 5.91
 12 0 -29 0.59 3.45
 12 0 -28 3.86 3.62
 12 0 -27 -2.1 3.44
 12 0 -26 1.29 3.34
 12 0 -25 -0.1 4.88
 12 0 -24 -0.22 3.11
 12 0 -23 0.59 2.99
 -12 0 23 -1.61 2.02
 12 0 -22 8.25 2.97
 -12 0 22 3.22 2.09
 12 0 -21 0.8 4.21
 -12 0 21 0.68 1.93
 12 0 -20 -2.06 2.68
 -12 0 20 1.82 3.14
 12 0 -19 -4.89 2.37
 -12 0 19 5.16 3.1
 12 0 -18 13.76 2.79
 -12 0 18 7.57 3.46
 12 0 -17 -5.43 2.28
 -12 0 17 1.2 1.92
 12 0 -16 -2.45 3.55
 -12 0 16 6.44 2.02
 12 0 -15 -0.62 2.05
 -12 0 15 1.02 1.88
 12 0 -14 32.93 2.95
 -12 0 14 30.4 4.01
 12 0 -13 1.67 1.86
 -12 0 13 0.52 2.65
 12 0 -12 -2.97 2.71
 -12 0 12 0.03 1.72
 12 0 -11 2.11 1.71
 -12 0 11 -0.98 1.62
 12 0 -10 18.48 2.14
 -12 0 10 17.82 3.02
 12 0 -9 -1.42 1.57
 -12 0 9 0.34 1.59
 12 0 -8 8.09 2.49
 -12 0 8 3.88 1.72
 12 0 -7 0.58 1.43
 -12 0 7 -0.53 1.57
 12 0 -6 12.07 1.59
 -12 0 6 6.87 1.7
 12 0 -5 -0.02 1.32
 -12 0 5 -0.52 1.58
 12 0 -4 8.21 2.12
 -12 0 4 2.69 1.59
 12 0 -3 -0.98 1.27
 -12 0 3 -0.87 1.55
 12 0 -2 0.59 1.23
 -12 0 2 2.52 2.6
 12 0 -1 -2.02 1.19
 -12 0 1 3.28 1.7
 12 0 0 4.19 1.81
 -12 0 0 1.19 1.75
 12 0 1 -0.25 1.09
 -12 0 -1 3.05 1.7
 12 0 2 33.35 1.67
 -12 0 -2 24.98 2.71
 12 0 3 -2.28 1.6
 -12 0 -3 3.37 1.83
 12 0 4 0.35 1.47
 -12 0 -4 0.42 1.92
 12 0 5 -0.11 0.95
 -12 0 -5 3.25 3.09
 12 0 6 4.63 1.43
 -12 0 -6 2.3 2.19
 12 0 7 0.13 1.38
 -12 0 -7 2.92 2.2
 12 0 8 0.83 0.85
 -12 0 -8 5.08 2.27
 12 0 9 0.77 0.84
 -12 0 -9 0.24 2.27
 12 0 10 5.55 1.37
 -12 0 -10 3.05 2.5
 12 0 11 -0.79 0.76
 -12 0 -11 2.33 2.4
 -12 0 -12 2.14 3.95
 -12 0 -13 11.77 4.51
 -12 0 -14 14.88 4.91
 -12 0 -15 8.49 4.55
 -12 0 -16 9.76 4.78
 -12 0 -17 -1.55 4.48
 -12 0 -18 -5 4.94
 -12 0 -19 0.58 4.74
 -12 0 -20 6.32 4.9
 -12 0 -21 1.11 4.93
 -12 0 -22 1.02 5.04
 -12 0 -23 2.52 5.27
 -12 0 -24 -0.61 3.31
 -12 0 -25 6.09 3.74
 -12 0 -26 0.31 3.52
 12 -1 -33 1.91 4.12
 12 -1 -32 2.1 3.86
 12 -1 -31 7.32 4.1
 12 -1 -30 1.22 5.64
 12 -1 -29 -2 3.44
 12 1 -29 1.48 3.48
 12 1 -28 -3.36 3.43
 12 -1 -28 5.15 3.35
 12 1 -27 1.32 3.34
 12 -1 -27 -3.11 3.31
 12 1 -26 -2.56 3.35
 12 -1 -26 -2.29 5.11
 12 1 -25 9.92 3.56
 12 -1 -25 1.99 3.5
 -12 1 25 8.93 2.69
 12 1 -24 5.36 3.22
 12 -1 -24 1.1 3.25
 -12 1 24 5.38 4.06
 12 1 -23 5.01 4.74
 12 -1 -23 -5.43 3.1
 -12 1 23 8.76 2.64
 12 1 -22 -4.32 2.77
 12 -1 -22 0.91 2.72
 -12 1 22 2.25 2.57
 12 1 -21 -4.22 2.72
 12 -1 -21 -3.96 2.75
 -12 1 21 6.42 2.5
 12 1 -20 4.66 2.73
 12 -1 -20 1.35 2.76
 -12 -1 20 3.62 2.33
 -12 1 20 -3.8 3.9
 12 -1 -19 4.78 4.09
 12 1 -19 5.11 2.63
 -12 -1 19 2.47 1.63
 -12 1 19 2.93 2.51
 12 -1 -18 4.46 2.47
 12 1 -18 -0.67 2.35
 -12 -1 18 1.19 1.56
 -12 1 18 3.67 2.43
 12 1 -17 7.49 3.65
 12 -1 -17 5.36 2.48
 -12 -1 17 2.4 1.69
 -12 1 17 7.37 3.67
 12 1 -16 8.68 2.41
 12 -1 -16 6.15 2.43
 -12 -1 16 4.32 1.77
 -12 1 16 10.74 2.44
 12 1 -15 6.41 2.21
 12 -1 -15 4.31 2.18
 -12 -1 15 2.46 1.67
 -12 1 15 6.2 2.33
 12 1 -14 7.42 2.48
 12 -1 -14 15.89 2.5
 -12 -1 14 19.89 1.91
 -12 1 14 19.26 4.01
 12 1 -13 -3.63 1.88
 12 -1 -13 -1.12 1.97
 -12 -1 13 2.44 1.43
 -12 1 13 0.56 2.06
 12 -1 -12 2.6 3.17
 12 1 -12 4.16 1.94
 -12 -1 12 6.6 1.52
 -12 1 12 5.21 2.09
 12 1 -11 5.15 2.74
 12 -1 -11 5 2.02
 -12 -1 11 6.12 2.38
 -12 1 11 4.25 2.06
 12 -1 -10 1.25 1.84
 12 1 -10 3.68 1.57
 -12 -1 10 -1.68 1.45
 -12 1 10 -5.49 1.89
 12 1 -9 0.85 1.54
 12 -1 -9 2.86 2.79
 -12 -1 9 2.59 1.43
 -12 1 9 -0.29 2.84
 12 1 -8 -1.45 1.46
 12 -1 -8 -0.12 1.76
 -12 -1 8 0.4 2.12
 -12 1 8 -3.09 1.79
 12 -1 -7 7.25 1.83
 12 1 -7 5.97 1.51
 -12 -1 7 5.49 1.5
 -12 1 7 7.93 2.93
 12 -1 -6 1.26 2.5
 12 1 -6 2.69 1.33
 -12 -1 6 0.4 1.51
 -12 1 6 4.2 1.79
 12 1 -5 -0.17 1.24
 12 -1 -5 -1.51 1.55
 -12 -1 5 -1.51 1.53
 -12 1 5 3.8 2.68
 12 -1 -4 -0.14 1.53
 12 1 -4 -0.28 1.2
 -12 -1 4 0.4 1.48
 -12 1 4 4.7 1.8
 12 -1 -3 5.38 2.36
 12 1 -3 8.13 1.82
 -12 -1 3 4.1 1.61
 -12 1 3 1.61 1.92
 12 -1 -2 1.65 1.5
 12 1 -2 3.45 1.64
 -12 -1 2 1.72 2.42
 -12 1 2 1.84 1.79
 12 1 -1 3.62 1.59
 12 -1 -1 3.03 1.49
 -12 -1 1 3.23 1.7
 -12 1 1 3.6 1.86
 12 1 0 2.07 1.42
 12 -1 0 -0.3 2.14
 -12 -1 0 -4.21 1.74
 -12 1 0 0.57 1.82
 12 1 1 2.84 1.47
 12 -1 1 3.52 1.51
 -12 -1 -1 8.78 2.75
 -12 1 -1 5.81 1.96
 12 -1 2 5.32 1.45
 12 1 2 4.64 1.32
 -12 -1 -2 4.36 1.85
 -12 1 -2 0.2 2
 12 1 3 1.97 1.14
 12 -1 3 0.57 2.1
 -12 -1 -3 0.13 1.81
 -12 1 -3 -1.83 1.89
 12 -1 4 0.86 1.31
 12 1 4 -0.05 0.64
 -12 -1 -4 1.18 1.9
 -12 1 -4 0.92 3.15
 12 1 5 11.73 0.73
 12 -1 5 13.29 2.38
 -12 -1 -5 14.75 2.38
 -12 1 -5 13.32 2.46
 12 -1 6 4.18 1.37
 12 1 6 3.12 0.77
 -12 -1 -6 2.68 3.35
 -12 1 -6 7.73 2.22
 12 -1 7 3.31 1.38
 -12 -1 -7 1.86 3.29
 -12 1 -7 3.15 2.29
 12 -1 8 3.45 2.13
 -12 -1 -8 0.59 2.21
 -12 1 -8 0.19 2.3
 12 -1 9 5.11 1.58
 -12 -1 -9 3.74 2.5
 -12 1 -9 8.68 3.76
 12 -1 10 2.69 1.64
 -12 -1 -10 3.58 2.51
 -12 1 -10 3.63 2.45
 -12 -1 -11 35.57 3.8
 -12 1 -11 34.45 3.58
 -12 1 -12 7.98 2.8
 -12 -1 -12 11.79 2.88
 -12 -1 -13 4.02 2.66
 -12 1 -13 0.93 2.58
 -12 -1 -14 3.25 2.96
 -12 1 -14 5.5 2.74
 -12 -1 -15 10.52 3.22
 -12 1 -15 7.59 3.17
 -12 1 -16 4.96 2.86
 -12 -1 -16 1.39 3
 -12 -1 -17 0.98 3.1
 -12 1 -17 5.42 2.98
 -12 -1 -18 -0.13 3.03
 -12 1 -18 -0.31 2.89
 -12 -1 -19 2.14 3.19
 -12 1 -19 0.59 3
 -12 1 -20 -2.12 2.96
 -12 -1 -20 1.23 3.15
 -12 -1 -21 -0.1 3.35
 -12 1 -21 -3.38 3.06
 -12 -1 -22 3.3 3.43
 -12 1 -22 0.46 3.18
 -12 -1 -23 -0.67 3.47
 -12 1 -23 1.13 3.15
 -12 -1 -24 -1.8 5.43
 -12 1 -24 1.64 3.22
 -12 -1 -25 -0.4 5.68
 -12 1 -25 -2.9 3.31
 -12 -1 -26 0.21 3.86
 -12 1 -26 -1.27 3.32
 12 -2 -32 -3.66 4.04
 12 -2 -31 5.43 4.03
 12 -2 -30 3.05 3.73
 12 -2 -29 7.73 3.94
 12 -2 -28 0.81 3.49
 12 -2 -27 2.83 5.48
 -12 2 27 4.73 3.24
 12 -2 -26 3.95 3.35
 -12 2 26 2.25 4.89
 12 -2 -25 2.12 3.2
 -12 2 25 1.99 3.11
 12 -2 -24 3.66 3.18
 -12 2 24 0.12 3.16
 12 -2 -23 6.43 3.22
 -12 2 23 4.3 3.27
 12 -2 -22 -9.18 3.12
 -12 2 22 -0.43 3.31
 12 -2 -21 -5.22 2.89
 -12 2 21 -1.74 4.99
 12 -2 -20 6.28 4.37
 -12 2 20 1.82 3.05
 12 2 -19 3.99 2.54
 12 -2 -19 -5.27 2.66
 -12 2 19 2.5 4.26
 12 -2 -18 7.03 2.55
 12 2 -18 2.48 2.58
 -12 2 18 3.01 2.89
 -12 -2 18 1.36 1.79
 12 2 -17 7.38 2.45
 12 -2 -17 7.01 3.93
 -12 -2 17 1.26 1.23
 -12 2 17 0.94 2.83
 12 2 -16 0.27 2.33
 12 -2 -16 9.9 2.53
 -12 -2 16 -0.59 1.3
 -12 2 16 3.36 2.82
 12 2 -15 5.12 2.2
 12 -2 -15 5.77 2.41
 -12 -2 15 -1.89 2.05
 -12 2 15 1.99 2.6
 12 2 -14 8.76 2.33
 12 -2 -14 6.2 3.92
 -12 2 14 10.85 4.32
 -12 -2 14 8.59 2.17
 12 2 -13 23.02 2.69
 12 -2 -13 20.66 3.07
 -12 -2 13 24.44 2.76
 -12 2 13 27.8 3.33
 12 2 -12 -1.91 1.87
 12 -2 -12 2.09 2.06
 -12 2 12 2.88 3.74
 -12 -2 12 1.98 1.94
 12 2 -11 15.43 2
 12 -2 -11 12.96 3.7
 -12 -2 11 8.12 2.36
 -12 2 11 11.42 2.78
 12 -2 -10 -2.61 2.03
 12 2 -10 2.59 1.7
 -12 2 10 0.21 3.46
 -12 -2 10 0 1.23
 12 2 -9 1.23 1.57
 12 -2 -9 -2.3 1.9
 -12 -2 9 0.29 1.33
 -12 2 9 -0.22 2.19
 12 2 -8 7.58 1.68
 -12 -2 8 3.69 2.24
 -12 2 8 5.1 3.55
 12 2 -7 0.51 1.53
 12 -2 -7 5.75 1.92
 -12 -2 7 2.47 1.42
 -12 2 7 1.88 2.2
 12 -2 -6 -0.22 1.93
 12 2 -6 4.43 1.39
 -12 -2 6 -1.37 1.45
 -12 2 6 5.36 2.14
 12 2 -5 2.87 1.34
 12 -2 -5 2.53 2.85
 -12 -2 5 3.91 1.52
 -12 2 5 0.8 2.13
 12 2 -4 2.71 1.2
 12 -2 -4 1.08 1.84
 -12 -2 4 3 2.31
 -12 2 4 1.81 2.1
 12 2 -3 -0.53 1.13
 12 -2 -3 2.52 1.78
 -12 -2 3 -0.31 1.49
 -12 2 3 0.01 3.04
 12 -2 -2 6.45 1.83
 12 2 -2 4.73 1.14
 -12 -2 2 5.42 1.68
 -12 2 2 4.81 2.22
 12 -2 -1 0.1 1.75
 -12 -2 1 0.16 1.17
 -12 -2 1 0.76 2.51
 -12 2 1 0.99 2.03
 12 -2 0 12.93 2.96
 -12 -2 0 6.38 1.95
 -12 2 0 5 3.48
 -12 -2 0 6.24 1.2
 12 -2 1 7.65 2.03
 -12 -2 -1 6.06 1.13
 -12 -2 -1 9.07 2
 -12 2 -1 7.9 2.42
 12 -2 2 1.91 2.01
 -12 -2 -2 0.57 1.86
 -12 2 -2 -0.25 2.29
 -12 -2 -2 1.93 0.92
 12 -2 3 9.44 3.24
 -12 -2 -3 3.08 3.03
 -12 2 -3 -2.79 3.51
 12 -2 4 3.19 2.28
 -12 -2 -4 2.1 2.17
 -12 2 -4 3.65 2.21
 12 -2 5 -1.54 2.37
 -12 -2 -5 3.66 2.13
 -12 2 -5 3.03 2.28
 -12 -2 -6 1.13 2.27
 -12 2 -6 3.34 2.35
 -12 -2 -7 2.24 2.4
 -12 2 -7 3.05 2.36
 -12 -2 -8 4.37 2.51
 -12 2 -8 3.53 3.74
 -12 2 -9 7.47 2.55
 -12 -2 -9 6.6 2.69
 -12 -2 -10 10.92 2.86
 -12 2 -10 3.61 2.6
 -12 -2 -11 0.9 2.77
 -12 2 -11 3.78 2.6
 -12 -2 -12 -0.51 2.81
 -12 2 -12 2.34 2.46
 -12 2 -13 -1.18 2.54
 -12 -2 -13 -1.86 2.91
 -12 -2 -14 10.78 3.42
 -12 2 -14 9.71 3.09
 -12 -2 -15 -1.07 3.04
 -12 2 -15 0.75 2.68
 -12 -2 -16 4.61 3.39
 -12 2 -16 3.89 2.84
 -12 2 -17 6.39 4.54
 -12 -2 -17 1.46 3.35
 -12 -2 -18 -0.15 3.34
 -12 2 -18 -5.04 4.53
 -12 2 -18 1.59 4.51
 -12 -2 -19 1.93 3.27
 -12 2 -19 -0.9 4.64
 -12 -2 -20 3.94 3.57
 -12 2 -20 7.33 4.89
 -12 -2 -21 -6.09 3.61
 -12 2 -21 -1.2 4.98
 -12 -2 -22 10.46 3.75
 -12 2 -22 2.32 5.15
 -12 2 -22 1.88 5.31
 -12 -2 -23 -5.08 3.62
 -12 2 -23 3.1 4.66
 -12 -2 -24 -9.36 5.87
 -12 2 -24 6.67 4.8
 -12 2 -25 1.66 3.17
 12 -3 -31 4 4.05
 12 -3 -30 16.21 6.95
 12 -3 -29 -1.28 3.56
 -12 3 29 1.8 3.71
 12 -3 -28 -0.63 3.6
 -12 3 28 -1.07 3.63
 12 -3 -27 0.2 5.47
 12 -3 -27 2.65 5.32
 -12 3 27 4.37 3.7
 12 -3 -26 3.14 3.28
 -12 3 26 -2.38 3.56
 12 -3 -25 1.13 3.22
 -12 3 25 -2.27 3.6
 12 -3 -24 -0.9 4.96
 -12 3 24 6.62 5.71
 12 -3 -23 8.2 3.23
 -12 3 23 -3.86 3.76
 12 -3 -22 8.54 3.3
 -12 3 22 0.84 5.94
 12 -3 -21 -7.16 2.97
 -12 3 21 9.09 3.55
 12 -3 -20 0.59 3.09
 -12 3 20 9.34 5.38
 12 -3 -19 0.21 2.91
 -12 3 19 3.87 3.35
 12 -3 -18 6.35 3.01
 -12 3 18 8.73 5.34
 12 -3 -17 9.78 3.41
 -12 3 17 22.39 3.88
 12 -3 -16 -4.66 2.84
 -12 3 16 5.96 4.96
 12 -3 -15 4.75 2.7
 -12 3 15 3.11 3.19
 -12 -3 15 2.09 1.1
 12 -3 -14 8.14 2.84
 -12 -3 14 11.4 2.01
 -12 3 14 8.67 5.15
 12 -3 -13 11.7 2.82
 -12 -3 13 7.04 2.02
 -12 3 13 9.18 3.17
 12 -3 -12 2.23 3.7
 -12 -3 12 1.94 1.74
 -12 3 12 -1.9 2.75
 -12 -3 12 -1.25 1.67
 12 -3 -11 -2.92 2.51
 -12 -3 11 5.24 1.91
 -12 3 11 3.91 2.88
 12 -3 -10 -4.75 2.37
 -12 -3 10 0.62 1.22
 -12 3 10 -0.96 2.73
 12 -3 -9 4.83 3.63
 -12 -3 9 1.19 1.41
 -12 3 9 7.94 2.73
 12 -3 -8 4.52 2.57
 -12 3 8 6.64 2.84
 -12 -3 8 9.64 2.41
 12 -3 -7 0.26 2.47
 -12 -3 7 3.81 1.53
 -12 3 7 9.5 4.12
 12 -3 -6 0.15 3.81
 -12 -3 6 3.35 2.38
 -12 3 6 1.34 2.53
 12 -3 -5 0.88 2.37
 -12 -3 5 -0.47 1.56
 -12 3 5 6.67 2.47
 12 -3 -4 19.91 2.97
 -12 -3 4 12.72 2.04
 -12 3 4 14.92 4.44
 12 -3 -3 -1.84 2.46
 -12 -3 3 2.07 2.68
 -12 3 3 -0.09 2.48
 12 -3 -2 -2.6 2.61
 -12 -3 2 3.27 1.8
 -12 3 2 -1.68 2.57
 12 -3 -1 3.41 2.72
 -12 -3 1 2.81 1.95
 -12 3 1 -0.72 3.75
 12 -3 0 16.17 3.49
 -12 -3 0 17.45 2.35
 -12 3 0 12.87 2.99
 12 -3 1 1.89 3.01
 -12 -3 -1 2.25 1
 -12 -3 -1 5.93 3.21
 -12 3 -1 4.97 2.55
 12 -3 2 6.46 5.13
 -12 3 -2 11.64 4.07
 -12 -3 -2 5.23 2.27
 -12 -3 -3 4.19 2.2
 -12 3 -3 1.1 2.51
 -12 -3 -4 13.83 2.66
 -12 3 -4 8.29 2.99
 -12 -3 -5 5.86 2.57
 -12 3 -5 10.34 2.84
 -12 -3 -6 2.47 2.54
 -12 3 -6 4.83 2.74
 -12 -3 -7 -2.78 2.37
 -12 3 -7 9.26 3.93
 -12 -3 -8 0.93 2.52
 -12 3 -8 -3.66 2.74
 -12 -3 -9 1.04 2.71
 -12 3 -9 3.31 2.82
 -12 -3 -10 1.26 2.79
 -12 3 -10 -5.6 2.81
 -12 -3 -11 3.09 2.88
 -12 3 -11 -1.54 2.82
 -12 -3 -12 1.2 3.07
 -12 3 -12 4.54 2.97
 -12 -3 -13 3.95 3.32
 -12 3 -13 5.49 4.79
 -12 -3 -14 1.16 3.3
 -12 3 -14 4.18 4.53
 -12 -3 -15 -6.15 3.4
 -12 3 -15 -0.62 3.1
 -12 -3 -16 -3.79 3.36
 -12 3 -16 0.96 2.99
 -12 -3 -17 1.97 3.36
 -12 3 -17 -1.63 2.89
 -12 -3 -18 -5.39 3.53
 -12 3 -18 0.45 3.23
 -12 -3 -19 4 3.57
 -12 3 -19 0.33 3.2
 -12 -3 -20 5.89 3.87
 -12 3 -20 8 3.37
 -12 -3 -21 2.39 3.7
 -12 3 -21 1.01 3.22
 -12 -3 -22 2.75 3.72
 -12 3 -22 -0.84 3.21
 -12 -3 -23 -5.24 5.88
 -12 3 -23 0.93 3.22
 -12 -3 -24 -1.35 6.23
 -12 3 -24 3.33 3.39
 12 -4 -29 -0.15 3.87
 -12 4 29 -4.02 4.24
 12 -4 -28 0.66 3.71
 -12 4 28 -3.92 4.41
 12 -4 -27 0.68 3.47
 -12 4 27 -2.19 4.17
 12 -4 -26 4.6 3.74
 -12 4 26 7.76 6.76
 12 -4 -25 3.45 3.35
 -12 4 25 -0.81 4.09
 12 -4 -24 5.86 3.56
 -12 4 24 3.47 6.51
 12 -4 -23 0.52 3.51
 -12 4 23 4.55 4.22
 12 -4 -22 4.71 3.32
 -12 4 22 -1.31 4.1
 12 -4 -21 0.43 3.27
 -12 4 21 -0.68 3.91
 12 -4 -20 -3.3 3.4
 -12 4 20 0.18 4.01
 12 -4 -19 3.13 3.33
 -12 4 19 0.65 6.26
 12 -4 -18 -7.74 3.3
 -12 4 18 5.63 3.69
 12 -4 -17 -3.42 3.16
 -12 4 17 1.66 3.66
 12 -4 -16 8.54 3.48
 -12 4 16 11.58 4.1
 12 -4 -15 5.55 3.05
 -12 4 15 1.32 3.69
 12 -4 -14 5.44 3.37
 -12 4 14 12.53 5.87
 12 -4 -13 6.44 3.4
 -12 -4 13 6.37 1.69
 -12 4 13 5.23 3.74
 12 -4 -12 1.34 3.04
 -12 -4 12 0.74 1.7
 -12 4 12 -1.17 3.31
 12 -4 -11 4.24 3.16
 -12 -4 11 2.89 1.33
 -12 4 11 6.5 3.35
 12 -4 -10 5.56 3.17
 -12 -4 10 2.56 1.43
 -12 4 10 3.6 3.29
 12 -4 -9 10.73 4.95
 -12 -4 9 2.03 2.36
 -12 4 9 5.35 5.11
 12 -4 -8 4.55 2.93
 -12 -4 8 -0.19 1.52
 -12 4 8 0.49 3.09
 12 -4 -7 0.15 3.27
 -12 -4 7 4.84 2.86
 -12 4 7 16.8 3.32
 12 -4 -6 -11.62 4.7
 -12 -4 6 -0.93 1.83
 -12 4 6 7.02 4.7
 12 -4 -5 4.04 3.32
 -12 -4 5 -1.08 1.87
 -12 4 5 0.07 2.97
 12 -4 -4 1.89 3.4
 -12 -4 4 2.46 2.99
 -12 4 4 0.63 3.05
 12 -4 -3 -4.06 5.29
 -12 -4 3 1.5 1.94
 -12 4 3 0.93 4.63
 12 -4 -2 30.43 4.81
 -12 -4 2 25.07 2.83
 -12 4 2 25.38 3.89
 12 -4 -1 31.15 4.57
 -12 -4 1 16.48 2.76
 -12 4 1 15.94 3.67
 -12 -4 0 22.66 4.76
 -12 4 0 24.22 3.95
 -12 -4 -1 17.69 3.03
 -12 4 -1 20.76 5.6
 -12 -4 -2 -1.73 2.45
 -12 4 -2 1.63 2.82
 -12 -4 -3 3.22 2.77
 -12 4 -3 4.82 3.11
 -12 -4 -4 4.3 2.88
 -12 4 -4 7.62 3.21
 -12 -4 -5 1.35 2.8
 -12 4 -5 1.57 4.56
 -12 -4 -6 2.33 2.93
 -12 4 -6 3.35 3.11
 -12 -4 -7 5.09 3.2
 -12 4 -7 4.15 3.15
 -12 -4 -8 7.97 3.06
 -12 4 -8 1.9 3.24
 -12 -4 -9 2.58 3.08
 -12 4 -9 -3.93 3.13
 -12 -4 -10 1.88 3.28
 -12 4 -10 -0.54 3.09
 -12 -4 -11 4.67 3.42
 -12 4 -11 -0.33 4.99
 -12 -4 -12 5.13 3.52
 -12 4 -12 1.27 3.28
 -12 -4 -13 2.42 3.65
 -12 4 -13 8.92 3.54
 -12 -4 -14 7.95 3.7
 -12 4 -14 1.05 3.42
 -12 -4 -15 -3.21 3.6
 -12 4 -15 2.88 3.12
 -12 4 -16 -1.22 3.16
 -12 -4 -16 1.33 3.63
 -12 -4 -17 -1.07 3.67
 -12 4 -17 -1 3.31
 -12 -4 -18 1.37 3.84
 -12 4 -18 0.88 3.39
 -12 -4 -19 6.17 4.08
 -12 4 -19 4.05 3.55
 -12 -4 -20 1.28 3.88
 -12 4 -20 0.49 3.33
 -12 -4 -21 5.39 6.25
 -12 4 -21 -0.1 3.43
 -12 -4 -22 4.64 6.54
 -12 4 -22 3.01 3.6
 12 -5 -27 7.63 4.13
 -12 5 27 4.06 5.02
 12 -5 -26 3.08 3.73
 -12 5 26 -4.21 4.57
 12 -5 -25 1.12 3.76
 -12 5 25 1.12 4.47
 12 -5 -24 -4.47 3.72
 -12 5 24 5.69 4.39
 12 -5 -23 4.44 3.83
 -12 5 23 7.21 7.2
 12 -5 -22 1.63 3.76
 -12 5 22 2.27 4.57
 12 -5 -21 10.51 4.02
 -12 5 21 2.21 4.89
 12 -5 -20 1.45 5.33
 -12 5 20 -0.78 6.74
 12 -5 -19 -4.68 3.62
 -12 5 19 7.05 4.35
 12 -5 -18 -9.17 3.69
 -12 5 18 4.49 4.65
 12 -5 -17 21.31 6.7
 -12 5 17 14.63 8.01
 12 -5 -16 2.98 3.86
 -12 5 16 2.57 4.23
 12 -5 -15 10.79 4.02
 -12 5 15 3.58 4.51
 12 -5 -14 -0.55 5.65
 -12 5 14 1.7 3.99
 12 -5 -13 0.77 4.05
 -12 5 13 -6.49 4.16
 12 -5 -12 4.05 4.01
 -12 5 12 5.56 4.15
 12 -5 -11 0.78 5.97
 -12 -5 11 2.78 1.43
 -12 5 11 1.6 4.03
 12 -5 -10 4.68 4.09
 -12 5 10 8.93 4.11
 -12 -5 10 5.04 2.47
 12 -5 -9 10.79 4.1
 -12 -5 9 4.28 1.81
 -12 5 9 6.19 3.94
 12 -5 -8 8.94 5.89
 -12 -5 8 0.89 2.72
 -12 5 8 -2.19 3.56
 12 -5 -7 9.82 4.18
 -12 -5 7 2.54 1.96
 -12 5 7 1.81 3.84
 12 -5 -6 1.84 4.11
 -12 5 6 -0.66 3.6
 -12 -5 6 3.05 2.07
 12 -5 -5 7.8 6.4
 -12 -5 5 1.01 3.33
 -12 5 5 1.65 5.55
 12 -5 -4 7.33 4.42
 -12 -5 4 4.52 2.5
 -12 5 4 -0.72 3.67
 12 -5 -3 -4.14 4.33
 -12 -5 3 1.47 2.41
 -12 5 3 -1.01 3.56
 12 -5 -2 5.56 4.5
 -12 5 2 0.83 3.75
 -12 -5 2 5.5 2.67
 -12 -5 1 3.74 2.75
 -12 5 1 3.49 5.56
 -12 -5 0 3.17 4.05
 -12 5 0 2.15 3.65
 -12 -5 -1 -0.82 4.04
 -12 5 -1 -3.77 3.66
 -12 -5 -2 3.48 2.79
 -12 5 -2 3.1 3.66
 -12 -5 -3 -4.29 2.82
 -12 5 -3 8.07 5.36
 -12 -5 -4 13.04 3.39
 -12 5 -4 8.21 3.92
 -12 -5 -5 0.79 3.05
 -12 5 -5 4.62 3.52
 -12 5 -6 2.74 3.81
 -12 -5 -6 6.11 3.26
 -12 -5 -7 1.6 3.19
 -12 5 -7 0.45 3.54
 -12 -5 -8 4.68 3.4
 -12 5 -8 1.51 5.48
 -12 -5 -9 1.62 3.45
 -12 5 -9 8.11 5.63
 -12 5 -10 6.21 3.63
 -12 -5 -10 2.16 3.49
 -12 -5 -11 5.99 3.61
 -12 5 -11 0.33 3.54
 -12 -5 -12 2.22 3.54
 -12 5 -12 1.04 3.59
 -12 -5 -13 2.46 3.55
 -12 5 -13 -3.76 3.57
 -12 5 -14 0.58 3.63
 -12 -5 -14 0.84 3.56
 -12 -5 -15 4.45 3.75
 -12 5 -15 -1.11 3.6
 -12 -5 -16 -7.05 5.94
 -12 5 -16 3.91 3.66
 -12 -5 -17 0.01 6.26
 -12 5 -17 -3.44 3.72
 -12 -5 -18 -0.02 6.29
 -12 5 -18 -0.94 5.76
 -12 -5 -19 1.31 4.3
 -12 5 -19 -1.35 5.69
 -12 -5 -20 0.88 4.34
 -12 5 -20 3.37 5.96
 12 -6 -23 1.12 4.22
 -12 6 23 1.14 4.97
 12 -6 -22 -0.15 4.2
 -12 6 22 -0.68 4.75
 12 -6 -21 7.9 7.08
 -12 6 21 8.44 8.28
 12 -6 -20 5.44 4.42
 -12 6 20 10.01 5.27
 12 -6 -19 3.37 4.08
 -12 6 19 -2.89 4.7
 12 -6 -18 10.46 7
 -12 6 18 6.3 8.19
 12 -6 -17 4.45 4.33
 -12 6 17 3.59 5.01
 12 -6 -16 -6.44 4.39
 -12 6 16 -4 4.97
 12 -6 -15 20.95 7.32
 -12 6 15 -3.21 7.73
 12 -6 -14 -4.89 4.4
 -12 6 14 -0.62 4.26
 12 -6 -13 -6.72 4.55
 -12 6 13 -1.66 4.59
 12 -6 -12 -4.13 6.91
 -12 6 12 8.36 6.73
 12 -6 -11 5.2 4.8
 -12 6 11 9.64 4.66
 12 -6 -10 2.49 4.52
 -12 6 10 4.35 4.37
 12 -6 -9 -8.73 7.3
 -12 6 9 -1.06 4.45
 12 -6 -8 5.24 4.59
 -12 -6 8 1.97 3.16
 -12 6 8 2.81 6.43
 12 -6 -7 15.84 4.96
 -12 6 7 -4.65 4.35
 -12 -6 7 2.61 2.31
 12 -6 -6 -14.25 7.65
 -12 -6 6 2.92 2.4
 -12 6 6 8.9 4.33
 12 -6 -5 -0.25 4.78
 -12 -6 5 0.47 2.42
 -12 6 5 -0.82 4.05
 12 -6 -4 -1.51 4.97
 -12 -6 4 0.68 4.08
 -12 6 4 -8.87 6.37
 12 -6 -3 2.89 5.16
 -12 6 3 0.3 4.2
 -12 -6 3 5.22 2.75
 -12 -6 2 5.56 2.93
 -12 6 2 6.97 4.39
 -12 -6 1 3.66 3.07
 -12 6 1 9.63 4.26
 -12 -6 0 3.26 3.03
 -12 6 0 5.65 6.39
 -12 6 -1 -0.68 3.95
 -12 -6 -1 0.69 2.98
 -12 -6 -2 1.87 3.22
 -12 6 -2 11.77 4.19
 -12 -6 -3 0.74 3.15
 -12 6 -3 0.75 3.88
 -12 -6 -4 0.48 3.07
 -12 6 -4 -0.72 3.84
 -12 -6 -5 7.28 5.31
 -12 6 -5 -1.11 6.67
 -12 -6 -6 3.69 5.29
 -12 6 -6 5.91 6.39
 -12 -6 -7 8.19 5.71
 -12 6 -7 7.43 4.52
 -12 -6 -8 6.02 5.64
 -12 6 -8 2.31 4.26
 -12 6 -9 5.75 4.31
 -12 -6 -9 5.32 5.73
 -12 -6 -10 -3.09 3.64
 -12 6 -10 -1 4.13
 -12 -6 -11 0.84 3.75
 -12 6 -11 -1.71 4.06
 -12 -6 -12 -0.44 3.76
 -12 6 -12 -2.48 4.11
 -12 6 -13 6.4 6.52
 -12 -6 -13 1.81 4.01
 -12 -6 -14 0.24 3.97
 -12 6 -14 0.14 6.17
 -12 -6 -15 9.48 4.56
 -12 6 -15 7.94 6.95
 -12 -6 -16 5.6 4.3
 -12 6 -16 1.37 4.22
 12 -7 -19 -8.57 5.14
 -12 7 19 -3.93 9.23
 12 -7 -18 -3.11 4.7
 -12 7 18 3.27 5.27
 12 -7 -17 -5.58 4.67
 -12 7 17 6.94 5.12
 12 -7 -16 -1.72 7.41
 -12 7 16 -1.42 7.93
 12 -7 -15 3.01 4.89
 -12 7 15 -0.96 5.17
 12 -7 -14 -1.35 4.93
 -12 7 14 -2.37 5.17
 12 -7 -13 2.83 8.27
 -12 7 13 14.67 5.73
 12 -7 -12 2.7 4.98
 -12 7 12 5.59 7.61
 12 -7 -11 4.01 4.85
 -12 7 11 3.14 4.9
 12 -7 -10 1.44 7.79
 -12 7 10 3.94 4.89
 12 -7 -9 1.25 5.1
 -12 7 9 2.2 4.65
 12 -7 -8 -3.09 5.03
 -12 7 8 3.34 7.15
 12 -7 -7 0.51 4.92
 -12 7 7 -0.64 4.58
 12 -7 -6 0.69 5.23
 -12 7 6 2.88 4.68
 12 -7 -5 1.82 5.27
 -12 -7 5 -0.45 2.81
 -12 7 5 5.9 4.54
 12 -7 -4 6.17 5.3
 -12 -7 4 -1.3 2.9
 -12 7 4 12 7.08
 12 -7 -3 1.52 7.98
 -12 -7 3 2.15 2.85
 -12 7 3 -0.99 4.5
 -12 -7 2 3.53 3.11
 -12 7 2 0.47 4.59
 -12 -7 1 -0.57 5.1
 -12 7 1 8.11 4.64
 -12 -7 0 -1.27 5.42
 -12 7 0 2.89 4.47
 -12 -7 -1 -0.35 5.33
 -12 7 -1 -0.94 6.88
 -12 -7 -2 -1.54 3.69
 -12 7 -2 13.49 6.97
 -12 -7 -3 -1.14 3.88
 -12 7 -3 -4.94 4.54
 -12 -7 -4 9.98 4.33
 -12 7 -4 15.25 5.07
 -12 -7 -5 -3.18 3.86
 -12 7 -5 -2.03 4.51
 -12 -7 -6 -1.88 3.93
 -12 7 -6 1.51 4.44
 -12 -7 -7 -1.53 4.05
 -12 7 -7 -1.77 4.56
 -12 -7 -8 7.05 4.4
 -12 7 -8 6.47 7.47
 -12 -7 -9 3.74 4.34
 -12 7 -9 -1.8 7.19
 -12 -7 -10 -0.08 4.28
 -12 7 -10 3.7 4.44
 -12 -7 -11 0.25 4.41
 -12 7 -11 1.89 4.36
 12 -8 -9 -0.72 5.53
 -12 8 9 3.42 5.46
 12 -8 -8 6.28 6.06
 -12 8 8 8.59 8.67
 12 -8 -7 -3.56 5.45
 -12 8 7 7.27 5.21
 12 -8 -6 3.63 5.68
 -12 8 6 -3.04 5.01
 12 -8 -5 5.16 5.98
 -12 8 5 8 5.56
 12 -8 -4 3.96 5.8
 -12 8 4 1.94 5.17
 12 -8 -3 15.87 8.8
 -12 8 3 -9.13 7.93
 -12 -8 2 -3.18 6.21
 -12 8 2 7.28 5.23
 -12 -8 1 8.76 6.49
 -12 8 1 6.76 5.57
 -12 -8 0 0.91 3.93
 -12 8 0 2.44 5.14
 -12 -8 -1 -2.22 3.89
 -12 8 -1 2.89 5.1
 -12 -8 -2 -2.41 4
 -12 8 -2 6.64 5.08
 13 0 -32 -1.61 4.01
 13 0 -31 3.26 3.94
 13 0 -30 2.85 5.95
 13 0 -29 1.61 3.56
 13 0 -28 5.2 3.68
 13 0 -27 2.06 3.48
 13 0 -26 3.47 5.41
 13 0 -25 6.79 3.53
 13 0 -24 0.5 3.28
 13 0 -23 -1.04 3.18
 13 0 -22 -4.93 3.04
 -13 0 22 6.67 2.14
 13 0 -21 6.61 4.49
 -13 0 21 1.76 3.55
 -13 0 20 -0.75 3.62
 13 0 -19 5.57 2.65
 -13 0 19 3.47 2.36
 13 0 -18 4.89 2.73
 -13 0 18 5.13 2.36
 13 0 -17 4.1 2.42
 -13 0 17 0.47 2.24
 13 0 -16 20.81 4.67
 -13 0 16 23.01 4.32
 13 0 -15 3.61 2.15
 -13 0 15 -1.53 2.1
 13 0 -14 6.69 2.34
 -13 0 14 6.22 2.17
 13 0 -13 2.23 2.01
 -13 0 13 -0.04 1.97
 13 0 -12 14.13 3.51
 -13 0 12 6.56 3.4
 13 0 -11 0.88 1.84
 -13 0 11 1.29 1.82
 13 0 -10 19.34 2.34
 -13 0 10 19.39 3.57
 13 0 -9 3.07 1.74
 -13 0 9 -1.44 1.86
 13 0 -8 3.87 1.74
 -13 0 8 2.19 1.87
 13 0 -7 2.71 2.44
 -13 0 7 -1.15 1.77
 13 0 -6 -0.26 1.52
 -13 0 6 4.81 1.77
 13 0 -5 0.68 1.45
 -13 0 5 1.16 1.76
 13 0 -4 2.84 1.52
 -13 0 4 7.56 2.74
 13 0 -3 3.42 2.05
 -13 0 3 -0.99 1.74
 13 0 -2 10.01 1.53
 -13 0 2 4.67 1.98
 13 0 -1 -0.22 1.3
 -13 0 1 -0.77 1.93
 13 0 0 20.07 1.7
 -13 0 0 17.1 2.53
 13 0 1 2.81 1.88
 -13 0 -1 -5.69 2.02
 13 0 2 4.48 1.95
 -13 0 -2 7.05 3.24
 13 0 3 -0.01 1.16
 -13 0 -3 -1.13 2.01
 13 0 4 5.14 1.22
 -13 0 -4 4.83 2.3
 13 0 5 0.67 1.03
 -13 0 -5 0.9 2.18
 13 0 6 18.19 1.96
 -13 0 -6 14.97 4.27
 13 0 7 3.17 1.5
 -13 0 -7 0.66 3.86
 13 0 8 7.5 1.04
 -13 0 -8 9.85 2.67
 13 0 9 0.22 0.82
 -13 0 -9 -2.76 2.58
 13 0 10 0.29 0.77
 -13 0 -10 -1.1 2.63
 -13 0 -11 -1.68 2.64
 -13 0 -12 7.68 3.12
 -13 0 -13 -0.04 2.82
 -13 0 -14 11.38 3.37
 -13 0 -15 -1.2 2.97
 -13 0 -16 -0.83 3.08
 -13 0 -17 -0.64 3.13
 -13 0 -18 0.85 3.18
 -13 0 -19 2.22 3.24
 -13 0 -20 4.36 3.46
 -13 0 -21 1.54 3.41
 -13 0 -22 -7 3.79
 -13 0 -23 1.63 3.58
 -13 0 -24 5.49 3.86
 -13 0 -25 -1.57 3.74
 13 -1 -32 -3.74 4.21
 13 -1 -31 -4.05 6.12
 13 -1 -30 0.19 3.82
 13 1 -29 -1.31 3.57
 13 -1 -29 -2.61 3.71
 13 1 -28 3 3.59
 13 -1 -28 1.84 3.6
 13 1 -27 5.49 3.55
 13 -1 -27 3.57 5.69
 13 1 -26 -3.47 3.44
 13 -1 -26 -1.57 3.38
 13 1 -25 3.98 3.15
 13 -1 -25 -1.39 3.21
 13 1 -24 6.9 5.25
 13 -1 -24 4.72 3.45
 -13 1 24 6.08 2.87
 13 1 -23 -2.21 4.89
 13 -1 -23 12.75 4.96
 -13 1 23 3.01 2.93
 13 -1 -22 4.09 2.98
 13 1 -22 -1.54 3.02
 -13 1 22 -1.52 2.64
 13 1 -21 0.04 2.91
 13 -1 -21 2.42 2.85
 -13 1 21 1.36 4.17
 13 1 -20 -2.94 2.69
 13 -1 -20 1.83 2.78
 -13 -1 20 -0.92 2.66
 -13 1 20 3.4 2.69
 13 -1 -19 5.39 4.39
 13 1 -19 7.36 2.67
 -13 -1 19 1.09 2.77
 -13 1 19 1.54 2.81
 13 1 -18 2.39 3.82
 13 -1 -18 -4.37 2.57
 -13 -1 18 3.51 2.68
 -13 1 18 2.89 3.92
 13 -1 -17 8.45 2.71
 13 1 -17 8.08 3.85
 -13 -1 17 8.99 3.1
 -13 1 17 4.09 2.78
 13 1 -16 0.06 2.45
 13 -1 -16 4.07 2.39
 -13 1 16 -1.18 3.93
 -13 -1 16 6.64 2.84
 13 1 -15 -1.4 2.34
 13 -1 -15 1.34 3.54
 -13 -1 15 -2.9 2.83
 -13 1 15 -1.82 2.53
 13 1 -14 -5.93 2.07
 13 -1 -14 1.58 2.19
 -13 -1 14 -0.86 1.76
 -13 1 14 -1.12 2.38
 13 -1 -13 3.48 2.14
 13 1 -13 0.13 2.03
 -13 -1 13 1.03 1.72
 -13 1 13 4.38 3.64
 13 1 -12 6.96 2.03
 13 -1 -12 0.5 2.16
 -13 -1 12 2.13 1.7
 -13 1 12 2.3 2.26
 13 -1 -11 9.97 2.39
 13 1 -11 17.27 3.16
 -13 -1 11 4.69 2.97
 -13 1 11 8.68 3.71
 13 1 -10 2.74 2.77
 13 -1 -10 1.48 2
 -13 -1 10 6.03 1.69
 -13 1 10 -2.8 2.2
 13 -1 -9 11.97 2.16
 13 1 -9 8.5 1.94
 -13 -1 9 8.28 1.85
 -13 1 9 10.61 2.35
 13 1 -8 2.75 1.63
 13 -1 -8 4.27 2.9
 -13 1 8 1.57 2.03
 -13 -1 8 -0.89 2.51
 13 1 -7 3.24 1.62
 13 -1 -7 7.25 2.01
 -13 -1 7 4.33 1.65
 -13 1 7 5.34 3.23
 13 1 -6 2.88 1.55
 13 -1 -6 0.88 1.92
 -13 -1 6 6.01 2.65
 -13 1 6 5.99 2.12
 13 -1 -5 -0.53 2.6
 13 1 -5 0.05 1.36
 -13 -1 5 -0.39 1.65
 -13 1 5 1.09 3.07
 13 1 -4 3.31 1.41
 13 -1 -4 6.29 1.76
 -13 -1 4 5.81 2.88
 -13 1 4 1.52 2.11
 13 -1 -3 10.13 1.86
 13 1 -3 6.85 1.38
 -13 -1 3 7.42 1.92
 -13 1 3 8.68 2.26
 13 1 -2 -1.65 1.78
 13 -1 -2 0.19 1.61
 -13 1 2 1.59 2.04
 -13 -1 2 1.09 1.76
 13 -1 -1 72.05 5
 13 1 -1 70.94 3.69
 -13 -1 1 71.71 5.6
 -13 1 1 69.91 4.22
 13 1 0 9.12 1.77
 13 -1 0 6.87 1.76
 -13 -1 0 4.55 2.17
 -13 1 0 6.18 2.22
 13 1 1 0.83 1.55
 13 -1 1 1.42 1.51
 -13 -1 -1 2.67 2
 -13 1 -1 2.55 3.01
 13 1 2 -1.33 0.92
 13 -1 2 1.42 2.38
 -13 -1 -2 -0.58 2.04
 -13 1 -2 2.84 2.06
 13 -1 3 1.11 1.57
 13 1 3 -1.58 0.85
 -13 -1 -3 -1.86 3.31
 -13 1 -3 2.45 2.11
 13 -1 4 7.17 1.71
 -13 1 -4 11.43 2.45
 -13 -1 -4 8.63 2.35
 13 -1 5 3.66 2.19
 13 1 5 -0.77 0.98
 -13 -1 -5 -0.88 2.09
 -13 1 -5 5.28 3.61
 13 -1 6 8.98 1.64
 -13 -1 -6 9.13 2.49
 -13 1 -6 5.81 2.59
 13 -1 7 6.5 1.59
 -13 -1 -7 10.33 2.59
 -13 1 -7 14.09 2.83
 13 -1 8 10.75 2.55
 -13 -1 -8 16.22 2.94
 -13 1 -8 16.05 2.98
 13 -1 9 5.07 1.54
 -13 -1 -9 11.39 2.79
 -13 1 -9 10.75 2.76
 13 -1 10 1.73 1.35
 -13 -1 -10 3.66 2.64
 -13 1 -10 2.08 2.69
 13 -1 11 6.58 2.31
 -13 -1 -11 6.64 4.61
 -13 1 -11 4.09 4.51
 13 -1 12 1.47 2.11
 -13 -1 -12 -6.05 4.21
 -13 1 -12 2.05 3.94
 -13 -1 -13 5.07 4.53
 -13 1 -13 2.94 2.86
 -13 1 -14 1.96 2.9
 -13 -1 -14 2.84 4.64
 -13 -1 -15 0.88 4.55
 -13 1 -15 -1.89 2.95
 -13 -1 -16 0.19 4.84
 -13 1 -16 2.24 2.95
 -13 -1 -17 -3.79 4.93
 -13 1 -17 -0.43 3.07
 -13 1 -18 -2.82 3.01
 -13 -1 -18 0.94 5.04
 -13 -1 -19 -3.65 5.39
 -13 1 -19 6.71 3.25
 -13 -1 -20 2.43 5.47
 -13 1 -20 3.5 3.32
 -13 -1 -21 -2.39 3.49
 -13 1 -21 -0.79 3.34
 -13 1 -22 -1.85 3.32
 -13 -1 -22 -1.66 3.55
 -13 -1 -23 4.72 3.68
 -13 1 -23 -0.71 3.43
 -13 -1 -24 -1.96 3.66
 -13 1 -24 -1.18 3.52
 13 -2 -31 3.42 6.29
 13 -2 -30 -2.94 3.9
 13 -2 -29 4.77 3.86
 13 -2 -28 1.26 3.48
 13 -2 -27 5.47 5.58
 13 -2 -26 -0.83 3.5
 -13 2 26 -2.32 3.22
 13 -2 -25 -0.74 3.22
 -13 2 25 1.16 3.35
 13 -2 -24 9.38 3.4
 -13 2 24 3.09 3.62
 13 -2 -23 -9.58 3.37
 -13 2 23 -2.14 3.71
 13 -2 -22 -4.06 3.16
 -13 2 22 6.6 5.12
 13 -2 -21 6.25 2.95
 -13 2 21 -1.98 3.27
 13 2 -20 0.54 2.86
 13 -2 -20 -0.66 4.5
 -13 2 20 2.95 4.87
 13 2 -19 9.95 3
 13 -2 -19 7.68 3.18
 -13 2 19 12.44 3.54
 13 2 -18 10.1 2.78
 13 -2 -18 -2.6 2.76
 -13 2 18 2.91 3.22
 13 2 -17 16.43 2.92
 13 -2 -17 7.66 3.04
 -13 -2 17 6.74 2.5
 -13 2 17 13.64 3.42
 13 2 -16 5.6 2.46
 13 -2 -16 0.2 2.65
 -13 -2 16 3.69 1.53
 -13 2 16 -0.14 3
 13 2 -15 0.88 2.28
 13 -2 -15 3.38 2.5
 -13 2 15 0.22 2.77
 -13 -2 15 0.59 1.47
 13 2 -14 0.06 2.24
 13 -2 -14 2.48 2.48
 -13 -2 14 2.26 1.52
 -13 2 14 1.44 2.79
 13 2 -13 12.93 2.56
 13 -2 -13 13.07 2.98
 -13 2 13 15.74 3.19
 -13 -2 13 15.2 1.89
 13 2 -12 1.93 2.09
 13 -2 -12 1.9 2.39
 -13 -2 12 2.93 2.3
 -13 2 12 6.02 2.66
 13 2 -11 2.33 2.01
 13 -2 -11 7.53 2.37
 -13 2 11 6.46 2.66
 -13 -2 11 3.15 1.61
 13 2 -10 1.77 2.01
 13 -2 -10 5.62 3.59
 -13 -2 10 6.6 1.58
 -13 2 10 8.42 2.61
 13 2 -9 0.55 1.71
 13 -2 -9 -2.24 2.1
 -13 2 9 4.56 2.42
 -13 -2 9 0.17 1.54
 13 2 -8 2.71 1.73
 13 -2 -8 3.32 2.11
 -13 -2 8 3.38 1.61
 -13 2 8 3.39 2.48
 13 2 -7 2.53 1.6
 13 -2 -7 6.34 3.35
 -13 2 7 8.54 2.44
 -13 -2 7 2.31 1.58
 13 2 -6 2.14 1.53
 13 -2 -6 7.85 2.08
 -13 -2 6 -1.95 1.63
 -13 2 6 5.66 3.65
 13 2 -5 4.55 1.5
 13 -2 -5 5.7 2.07
 -13 -2 5 1.51 1.79
 -13 2 5 3.25 2.39
 13 2 -4 4.74 1.44
 13 -2 -4 13.26 3.27
 -13 -2 4 4.86 1.9
 -13 2 4 7.1 2.45
 13 2 -3 25.29 1.71
 13 -2 -3 22.58 2.7
 -13 -2 3 23.96 3.64
 -13 2 3 21.06 3.03
 13 2 -2 6.1 1.22
 13 -2 -2 5.23 2.09
 -13 -2 2 7.21 1.92
 -13 2 2 9.2 2.53
 13 -2 -1 41.29 4.74
 -13 -2 1 44.07 3.14
 -13 2 1 45.33 3.81
 13 -2 0 16.66 2.22
 -13 -2 0 12.46 2.27
 -13 -2 0 10.25 1.4
 -13 2 0 12.82 4.13
 13 -2 1 4.82 1.97
 -13 -2 -1 0.87 1.11
 -13 -2 -1 0 3.08
 -13 2 -1 6.72 2.44
 13 -2 2 0.37 3.33
 -13 -2 -2 1.83 2.21
 -13 2 -2 8 2.61
 13 -2 3 1.24 2.14
 -13 2 -3 -1.04 2.49
 -13 -2 -3 5.02 2.25
 13 -2 4 1.55 2.32
 -13 -2 -4 4.15 2.28
 -13 2 -4 1.54 2.51
 13 -2 5 -3.46 3.65
 -13 -2 -5 0.36 2.26
 -13 2 -5 3.52 2.43
 13 -2 6 5.42 2.62
 -13 -2 -6 2.42 2.42
 -13 2 -6 3.58 2.66
 13 -2 7 -1.32 2.74
 -13 -2 -7 -1.41 3.74
 -13 2 -7 0.95 2.6
 13 -2 8 0.98 4.27
 -13 2 -8 0.6 2.52
 -13 -2 -9 0.75 4.23
 -13 2 -9 3.16 4.06
 -13 -2 -10 1.23 2.81
 -13 2 -10 2.27 2.69
 -13 -2 -11 12.77 3.39
 -13 2 -11 10.1 3.13
 -13 -2 -12 19.02 3.73
 -13 2 -12 15.05 3.27
 -13 -2 -13 2.32 3.11
 -13 2 -13 -1.74 2.84
 -13 -2 -14 -5.06 3.23
 -13 2 -14 0.13 2.92
 -13 -2 -15 -0.91 3.24
 -13 2 -15 2.17 2.89
 -13 -2 -16 1.36 3.47
 -13 2 -16 -3.52 2.91
 -13 -2 -17 -2.21 3.37
 -13 2 -17 0.1 3.02
 -13 -2 -18 1.93 5.5
 -13 2 -18 2.53 3.08
 -13 -2 -19 -5.01 5.42
 -13 2 -19 4.6 3.11
 -13 -2 -20 -0.44 5.28
 -13 2 -20 -1.1 3.12
 -13 -2 -21 4.83 5.53
 -13 2 -21 3.05 3.28
 -13 -2 -22 2.38 3.68
 -13 2 -22 -0.46 3.24
 -13 -2 -23 -3.06 3.84
 -13 2 -23 5.3 3.32
 -13 -2 -24 -2.7 3.86
 -13 2 -24 -2.99 3.48
 13 -3 -30 3.15 6.3
 13 -3 -29 -5.62 4
 13 -3 -28 1.53 3.76
 -13 3 28 4.23 3.96
 13 -3 -27 8.43 6.07
 -13 3 27 6.62 6.28
 13 -3 -26 0.13 3.41
 -13 3 26 -0.66 3.74
 13 -3 -25 1.46 3.27
 -13 3 25 -2.39 6.09
 13 -3 -24 -0.3 5.3
 -13 3 24 6.63 3.94
 13 -3 -23 -6.73 3.32
 -13 3 23 10.36 5.99
 13 -3 -22 7.52 3.4
 -13 3 22 5.21 4.09
 13 -3 -21 1.95 3.28
 -13 3 21 12.96 5.87
 13 -3 -20 5.29 3.31
 -13 3 20 3.49 3.81
 13 -3 -19 -1.09 3.06
 -13 3 19 1.13 5.57
 13 -3 -18 6.04 3.03
 -13 3 18 -4.2 3.58
 13 -3 -17 -3.71 4.58
 -13 3 17 -1.11 5.5
 13 -3 -16 0.88 3.03
 -13 3 16 6.05 3.46
 13 -3 -15 5.88 2.8
 -13 -3 15 -1.59 1.99
 -13 3 15 -0.92 3.37
 13 -3 -14 26.42 5.79
 -13 -3 14 30.08 2.96
 -13 3 14 27.25 4.39
 13 -3 -13 11.1 3.03
 -13 -3 13 8.46 2.4
 -13 3 13 9.2 3.49
 13 -3 -12 0.5 2.67
 -13 -3 12 3.13 1.33
 -13 3 12 10.64 3.24
 -13 -3 11 6.46 1.56
 -13 3 11 13.1 3.24
 13 -3 -10 20.74 3.16
 -13 3 10 19.4 5.51
 -13 -3 10 13.23 1.8
 13 -3 -9 6.73 2.64
 -13 -3 9 2.87 2.41
 -13 3 9 5.84 3.07
 13 -3 -8 -2.32 3.94
 -13 -3 8 2.16 1.62
 -13 3 8 6.23 2.92
 13 -3 -7 14.35 2.85
 -13 -3 7 7.18 2.88
 -13 3 7 5.79 3.12
 13 -3 -6 4.19 2.58
 -13 3 6 0.21 2.69
 -13 -3 6 0.17 1.72
 13 -3 -5 10.99 4.29
 -13 -3 5 6.95 1.92
 -13 3 5 1.12 4.63
 13 -3 -4 11.97 2.89
 -13 -3 4 9.1 3.17
 -13 3 4 6.79 3.13
 13 -3 -3 12.29 2.79
 -13 -3 3 2.84 2.06
 -13 3 3 9.09 3
 13 -3 -2 0.27 4.07
 -13 3 2 -2.07 2.71
 -13 -3 2 -0.11 1.96
 13 -3 -1 22.54 3.62
 -13 -3 1 15.14 3.83
 -13 3 1 19.35 3.4
 13 -3 0 -1.75 2.9
 -13 -3 0 3.55 2.17
 -13 3 0 -3.57 2.6
 13 -3 1 6.58 4.9
 -13 -3 -1 1.95 2.26
 -13 3 -1 1.16 2.64
 13 -3 2 5.35 3.5
 -13 -3 -2 8.68 2.53
 -13 3 -2 1.5 4.38
 13 -3 3 9.07 3.69
 -13 -3 -3 2.67 2.59
 -13 3 -3 5.4 2.85
 13 -3 4 1.98 5.63
 -13 -3 -4 6.64 2.66
 -13 3 -4 2.03 2.85
 -13 -3 -5 8.19 4.44
 -13 3 -5 10.56 3.09
 -13 3 -6 4.54 2.95
 -13 -3 -6 1.24 4.18
 -13 -3 -7 10.15 4.58
 -13 3 -7 5.25 5
 -13 -3 -8 10.65 3.38
 -13 3 -8 18.95 3.63
 -13 -3 -9 3.47 3.01
 -13 3 -9 1.3 3.02
 -13 3 -10 -0.97 3.11
 -13 -3 -10 4.12 2.99
 -13 -3 -11 1.23 3.2
 -13 3 -11 6.72 3.21
 -13 -3 -12 4.13 3.29
 -13 3 -12 -1.29 3.15
 -13 -3 -13 10.16 3.51
 -13 3 -13 0.18 3.37
 -13 3 -14 -1.06 4.85
 -13 -3 -14 1.4 3.32
 -13 -3 -15 3.37 3.48
 -13 3 -15 4.56 4.86
 -13 -3 -16 2.21 3.52
 -13 3 -16 4.87 5.01
 -13 -3 -17 4.41 5.35
 -13 3 -17 -0.17 3.19
 -13 -3 -18 2.46 5.36
 -13 3 -18 0.04 3.28
 -13 -3 -19 -3.4 5.64
 -13 3 -19 2.81 3.33
 -13 -3 -20 1.08 3.93
 -13 3 -20 5.97 3.48
 -13 -3 -21 4.58 3.91
 -13 3 -21 1.8 3.41
 -13 -3 -22 0 4
 -13 3 -22 2.63 3.4
 13 -4 -28 4.41 4.01
 -13 4 28 1.05 4.48
 13 -4 -27 -0.98 3.77
 -13 4 27 -3.16 6.93
 13 -4 -26 4.6 3.63
 -13 4 26 -4.15 4.31
 13 -4 -25 6.15 3.73
 -13 4 25 6.16 6.85
 13 -4 -24 2.41 3.38
 -13 4 24 -0.78 4.3
 13 -4 -23 -6.35 5.51
 -13 4 23 -1.71 4.29
 13 -4 -22 3.98 3.4
 -13 4 22 -1.34 4.39
 13 -4 -21 -5.08 3.37
 -13 4 21 7.52 4.22
 13 -4 -20 2.46 5.82
 -13 4 20 9.12 6.72
 13 -4 -19 -10.5 3.77
 -13 4 19 0.07 4.19
 13 -4 -18 5.5 3.34
 -13 4 18 -9.29 3.77
 13 -4 -17 -4.58 5.1
 -13 4 17 -2.79 4.05
 13 -4 -16 2.98 3.36
 -13 4 16 -3 3.89
 13 -4 -15 10.93 3.64
 -13 4 15 10.48 6.49
 13 -4 -14 10.44 5.07
 -13 4 14 2.27 3.91
 13 -4 -13 -0.68 3.32
 -13 -4 13 -0.56 1.22
 -13 4 13 -0.59 3.68
 13 -4 -12 11.04 3.24
 -13 -4 12 1.37 1.3
 -13 4 12 2.96 3.65
 13 -4 -11 -3.61 5.08
 -13 4 11 3.15 3.52
 -13 -4 11 2.67 1.47
 13 -4 -10 -2.37 3.38
 -13 -4 10 0.37 2.41
 -13 4 10 -1.2 3.4
 13 -4 -9 3.2 3.28
 -13 -4 9 -0.4 1.6
 -13 4 9 0.26 3.39
 13 -4 -8 1.84 5.03
 -13 -4 8 1.06 2.59
 -13 4 8 -4.3 3.27
 13 -4 -7 -3.09 3.34
 -13 4 7 -3.71 3.26
 -13 -4 7 -1.37 1.82
 13 -4 -6 4.44 3.47
 -13 -4 6 3.38 1.92
 -13 4 6 6.42 3.47
 13 -4 -5 2.1 5.67
 -13 -4 5 4.44 3.27
 -13 4 5 7.76 3.55
 13 -4 -4 -0.82 3.52
 -13 -4 4 -0.84 2.06
 -13 4 4 5.58 3.25
 13 -4 -3 10.7 4.46
 -13 -4 3 17.26 2.68
 -13 4 3 14.52 3.78
 13 -4 -2 1.83 4.01
 -13 -4 2 1.62 3.71
 -13 4 2 11.13 3.45
 13 -4 -1 29.6 5.52
 -13 -4 1 26.9 5.08
 -13 4 1 28.6 4.45
 13 -4 0 12.51 4.43
 -13 -4 0 6.7 2.68
 -13 4 0 11.66 5.42
 13 -4 1 7.49 4.27
 -13 4 -1 -0.61 3.18
 -13 -4 -1 1.36 2.5
 -13 -4 -2 3.15 2.68
 -13 4 -2 3.89 3.27
 -13 -4 -3 6.36 2.75
 -13 4 -3 7.12 3.44
 -13 -4 -4 1.79 2.77
 -13 4 -4 3.29 3.31
 -13 4 -5 4.5 5.07
 -13 -4 -5 3.16 4.6
 -13 -4 -6 4.46 4.52
 -13 4 -6 -1.84 3.17
 -13 -4 -7 4.26 4.91
 -13 4 -7 4.54 3.33
 -13 -4 -8 7.69 4.97
 -13 4 -8 -0.16 3.36
 -13 4 -9 4.51 3.39
 -13 -4 -9 -2.16 5.05
 -13 -4 -10 2.49 5.07
 -13 4 -10 -4.39 5
 -13 -4 -11 5.46 5.46
 -13 4 -11 -0.95 5.37
 -13 -4 -12 22.45 6.19
 -13 4 -12 11.7 3.98
 -13 -4 -13 14.04 6.15
 -13 4 -13 7.54 3.77
 -13 -4 -14 1.11 5.59
 -13 4 -14 0.85 3.35
 -13 -4 -15 6.82 5.63
 -13 4 -15 2.68 3.54
 -13 -4 -16 1.12 5.67
 -13 4 -16 1.36 3.46
 -13 4 -17 2.35 3.61
 -13 -4 -17 4.22 3.85
 -13 -4 -18 3.07 3.69
 -13 4 -18 -1.5 3.44
 -13 -4 -19 0.54 3.94
 -13 4 -19 1.75 3.56
 -13 -4 -20 1.98 4.03
 -13 4 -20 7.74 3.84
 -13 4 -21 -2.64 3.68
 -13 -4 -21 -1.41 4.21
 13 -5 -26 3.16 4.21
 -13 5 26 5.31 5.03
 13 -5 -25 4.87 4.14
 -13 5 25 1.11 4.79
 13 -5 -24 3.26 4.03
 -13 5 24 2.92 7.01
 13 -5 -23 3.61 3.99
 -13 5 23 2.48 4.83
 13 -5 -22 0.3 3.92
 -13 5 22 7.01 4.75
 13 -5 -21 0.72 3.82
 -13 5 21 -0.9 7.14
 13 -5 -20 -1.56 3.89
 -13 5 20 -2.13 4.55
 13 -5 -19 -6.09 5.94
 -13 5 19 -1.01 4.59
 13 -5 -18 5.5 3.93
 -13 5 18 8.19 7.19
 13 -5 -17 -6.77 4.02
 -13 5 17 -1.91 4.52
 13 -5 -16 9.6 6.42
 -13 5 16 1.31 4.54
 13 -5 -15 2.46 3.8
 -13 5 15 -2.82 4.3
 13 -5 -14 21.84 4.86
 -13 5 14 17.11 5.35
 13 -5 -13 3.21 5.96
 -13 5 13 -0.6 3.99
 13 -5 -12 0.27 3.95
 -13 5 12 -0.54 4.05
 13 -5 -11 1.38 4.21
 -13 5 11 4.43 4.19
 13 -5 -10 5.13 6.3
 -13 -5 10 1.1 1.64
 -13 5 10 7.66 4.13
 -13 -5 9 2.92 1.69
 -13 5 9 2.08 5.91
 13 -5 -8 -0.97 4
 -13 -5 8 3.34 2.93
 -13 5 8 -3.02 3.86
 13 -5 -7 -3.86 6.47
 -13 5 7 0.09 3.94
 -13 -5 7 3.97 2.08
 13 -5 -6 -0.91 4.25
 -13 -5 6 1.27 3.23
 -13 5 6 -6.97 5.85
 13 -5 -5 11 4.76
 -13 -5 5 2.49 2.45
 -13 5 5 13.01 3.99
 13 -5 -4 -3.32 4.54
 -13 -5 4 2.46 2.36
 -13 5 4 6.16 3.96
 13 -5 -3 -0.44 7.33
 -13 -5 3 2.45 2.49
 -13 5 3 4.29 3.89
 13 -5 -2 0.28 4.64
 -13 -5 2 1.92 3.91
 -13 5 2 2.41 5.63
 13 -5 -1 0.99 4.8
 -13 -5 1 11 4.26
 -13 5 1 -2.77 3.96
 13 -5 0 11.49 7.51
 -13 -5 0 0.82 2.95
 -13 5 0 5.39 3.85
 -13 5 -1 2.21 4.08
 -13 -5 -1 6.5 3.06
 -13 -5 -2 1.45 3.02
 -13 5 -2 3.99 5.95
 -13 -5 -3 -1.27 3.07
 -13 5 -3 3.92 3.59
 -13 -5 -4 -1.86 3.22
 -13 5 -4 -5.35 3.74
 -13 5 -5 -5.86 3.72
 -13 -5 -5 4.55 3.2
 -13 -5 -6 0.17 3.41
 -13 5 -6 -3.17 3.71
 -13 -5 -7 -0.55 3.46
 -13 5 -7 4.94 5.49
 -13 -5 -8 1.79 3.45
 -13 5 -8 -0.38 5.59
 -13 5 -9 0.65 3.71
 -13 -5 -9 0.73 3.36
 -13 -5 -10 -0.49 3.6
 -13 5 -10 3.73 3.71
 -13 -5 -11 -1.01 3.68
 -13 5 -11 -0.7 3.72
 -13 -5 -12 0.27 3.65
 -13 5 -12 5.42 3.88
 -13 -5 -13 0 3.71
 -13 5 -13 1.42 3.68
 -13 -5 -14 5.75 4.06
 -13 5 -14 1.04 3.91
 -13 -5 -15 1.11 4.05
 -13 5 -15 -0.39 3.83
 -13 -5 -16 -2.52 4.08
 -13 5 -16 4.41 3.88
 -13 5 -17 -1.7 5.92
 -13 -5 -17 3.62 4.29
 -13 -5 -18 -6.02 4.43
 -13 5 -18 -0.72 6.47
 13 -6 -22 -4.22 4.63
 -13 6 22 -2.43 8.43
 13 -6 -21 -2.96 6.54
 -13 6 21 2.44 5.03
 13 -6 -20 5.04 4.6
 -13 6 20 4.58 5.17
 13 -6 -19 2.05 4.4
 -13 6 19 12.19 8.04
 13 -6 -18 19.04 7.44
 -13 6 18 4.95 5.47
 13 -6 -17 0.15 4.37
 -13 6 17 4.66 4.92
 13 -6 -16 10 4.87
 -13 6 16 14.88 8.29
 13 -6 -15 1.72 4.37
 -13 6 15 1.55 4.6
 13 -6 -14 -1.57 4.47
 -13 6 14 1.41 4.4
 13 -6 -13 2.48 4.62
 -13 6 13 1.52 7.09
 13 -6 -12 -4.48 4.64
 -13 6 12 2.73 4.47
 13 -6 -11 -2.61 7.12
 -13 6 11 6.25 4.61
 13 -6 -10 4.11 4.62
 -13 6 10 -0.55 4.52
 13 -6 -9 10.59 5.21
 -13 6 9 15.92 8
 13 -6 -8 4.06 7.27
 -13 6 8 -3.94 4.44
 13 -6 -7 10.35 4.81
 -13 -6 7 1.59 2.31
 -13 6 7 0.93 4.46
 13 -6 -6 8.6 5.08
 -13 -6 6 2.25 2.44
 -13 6 6 2.46 4.5
 13 -6 -5 -0.62 4.82
 -13 6 5 7.34 6.52
 -13 -6 5 1.72 3.83
 13 -6 -4 3.68 5.3
 -13 -6 4 3.35 2.79
 -13 6 4 -3.02 4.28
 13 -6 -3 5.19 5.43
 -13 -6 3 8.39 3.06
 -13 6 3 -0.71 4.45
 13 -6 -2 3.02 5.33
 -13 -6 2 1.68 3.09
 -13 6 2 8.93 4.39
 13 -6 -1 5.7 8.16
 -13 6 1 -1.16 6.7
 -13 -6 1 4.37 3.18
 -13 -6 0 3.91 3.25
 -13 6 0 2.16 4.29
 -13 -6 -1 -5.51 4.82
 -13 6 -1 3.28 4.14
 -13 -6 -2 1.39 4.98
 -13 6 -2 1.22 4.15
 -13 -6 -3 9.05 5.43
 -13 6 -3 5.32 4.27
 -13 -6 -4 0.13 3.35
 -13 6 -4 9.46 6.64
 -13 -6 -5 2.75 3.42
 -13 6 -5 -0.27 4.2
 -13 -6 -6 -0.89 3.28
 -13 6 -6 1.33 4.14
 -13 6 -7 -3.35 4.42
 -13 -6 -7 -4.02 3.64
 -13 -6 -8 -6.98 3.63
 -13 6 -8 3.83 4.35
 -13 -6 -9 2.09 3.54
 -13 6 -9 -1.23 4.23
 -13 -6 -10 -3.12 3.71
 -13 6 -10 0.72 4.33
 -13 -6 -11 3.85 4.1
 -13 6 -11 9.46 6.69
 -13 -6 -12 -1.53 4
 -13 6 -12 6.7 6.39
 -13 -6 -13 3.34 4.03
 -13 6 -13 -7.11 6.53
 -13 -6 -14 -2.03 6.33
 -13 6 -14 1.29 4.16
 13 -7 -17 -3.78 5
 -13 7 17 0.99 8.7
 13 -7 -16 1.68 4.98
 -13 7 16 -2.94 5.34
 13 -7 -15 7.59 5.33
 -13 7 15 -0.63 5.53
 13 -7 -14 3.3 5.43
 -13 7 14 5.53 5.69
 13 -7 -13 1.85 5.56
 -13 7 13 13.36 8.27
 13 -7 -12 3.73 8
 -13 7 12 1.56 4.96
 13 -7 -11 2.28 5.08
 -13 7 11 -0.44 4.88
 13 -7 -10 6.46 5.32
 -13 7 10 -0.56 4.94
 13 -7 -9 1.55 7.73
 -13 7 9 0.41 7.35
 13 -7 -8 2.8 5.48
 -13 7 8 4.1 5.03
 13 -7 -7 -0.72 5.35
 -13 7 7 2.66 4.87
 13 -7 -6 5.19 5.27
 -13 7 6 -8.89 4.92
 13 -7 -5 3.65 8.93
 -13 7 5 9.89 8.07
 13 -7 -4 -2.37 5.42
 -13 -7 4 1.03 3.01
 -13 7 4 1.05 4.76
 13 -7 -3 6.79 5.8
 -13 -7 3 3.31 5.15
 -13 7 3 4.47 5
 13 -7 -2 5.63 5.69
 -13 -7 2 1.35 4.97
 -13 7 2 5.93 4.98
 -13 -7 1 4.47 3.35
 -13 7 1 4.05 4.87
 -13 -7 0 1.54 3.38
 -13 7 0 4.65 7.46
 -13 -7 -1 -1.23 3.33
 -13 7 -1 2.65 4.54
 -13 -7 -2 0.96 3.45
 -13 7 -2 2.8 4.74
 -13 -7 -3 5.65 3.66
 -13 7 -3 -2.35 4.82
 -13 -7 -4 -2.32 3.64
 -13 7 -4 4.53 4.65
 -13 -7 -5 7.97 3.93
 -13 7 -5 -0.77 4.91
 -13 -7 -6 0.6 3.76
 -13 7 -6 -3.69 7.32
 -13 -7 -7 1.04 3.85
 -13 7 -7 3.86 7.25
 -13 -7 -8 -2.98 3.86
 -13 7 -8 3.52 4.73
 -13 -7 -9 4.87 4.2
 -13 7 -9 4.22 4.99
 14 0 -32 10.15 4.6
 14 0 -31 3.74 4.14
 14 0 -30 9.21 6.66
 14 0 -29 -0.31 3.7
 14 0 -28 -1.59 3.59
 14 0 -27 4.56 3.65
 14 0 -26 3.14 5.46
 14 0 -25 -5.25 3.6
 14 0 -24 1.99 3.3
 14 0 -23 -9.86 3.72
 14 0 -22 11.72 3.49
 -14 0 22 6.75 4.21
 14 0 -21 -9.32 4.73
 -14 0 21 3.62 2.32
 14 0 -20 3.38 3.07
 -14 0 20 3.31 2.49
 14 0 -19 2.93 3.02
 -14 0 19 4.35 2.44
 14 0 -18 22.74 3.62
 -14 0 18 24.71 5.05
 14 0 -17 7.03 2.75
 -14 0 17 2.92 2.54
 14 0 -16 1.52 3.86
 -14 0 16 1.16 2.38
 -14 0 15 0.66 2.35
 14 0 -14 35.28 3.46
 -14 0 14 31.26 3.49
 14 0 -13 3.14 2.32
 -14 0 13 3.24 2.31
 14 0 -12 0.91 2.23
 -14 0 12 3.56 3.21
 14 0 -11 -8.07 3.15
 -14 0 11 -0.13 2.15
 14 0 -10 1.09 2.03
 -14 0 10 2.2 2.04
 14 0 -9 -1.52 1.94
 -14 0 9 -1.93 2.06
 14 0 -8 2.83 1.83
 -14 0 8 -1.89 2.01
 14 0 -7 2.97 2.67
 -14 0 7 1.21 2.05
 14 0 -6 6.09 2.62
 -14 0 6 0.48 2
 14 0 -5 0.74 1.65
 -14 0 5 3.07 1.99
 14 0 -4 21.91 2.1
 -14 0 4 21.74 3.95
 14 0 -3 0.7 1.48
 -14 0 3 1.52 1.93
 14 0 -2 2.94 2.26
 -14 0 2 3.76 2.1
 14 0 -1 -1.15 2.32
 -14 0 1 -1.77 3.14
 14 0 0 49.08 2.51
 -14 0 0 38.16 3.66
 14 0 1 1.6 1.38
 -14 0 -1 4.84 2.23
 14 0 2 65.87 2.92
 -14 0 -2 69.12 4.6
 14 0 3 -1.92 1.27
 -14 0 -3 0.15 3.51
 14 0 4 0.17 1.84
 -14 0 -4 0.14 2.25
 14 0 5 -2.58 1.8
 -14 0 -5 0.65 2.47
 14 0 6 5.85 1.8
 -14 0 -6 2.43 2.63
 14 0 7 0.02 1.01
 -14 0 -7 2.28 2.5
 14 0 8 0.81 0.96
 -14 0 -8 1.21 2.67
 -14 0 -9 -0.51 4.03
 -14 0 -10 6.87 4.87
 -14 0 -11 3.07 3.1
 -14 0 -12 0.87 3.01
 -14 0 -13 2.87 3.14
 -14 0 -14 2.95 3.24
 -14 0 -15 0.77 3.15
 -14 0 -16 2.63 3.39
 -14 0 -17 -1.05 3.31
 -14 0 -18 2.79 3.54
 -14 0 -19 -0.45 3.36
 -14 0 -20 1.01 3.49
 -14 0 -21 -1.6 3.62
 -14 0 -22 3.16 3.82
 -14 0 -23 -2.14 3.76
 14 -1 -31 -2.8 6.46
 14 1 -30 -0.09 4.01
 14 -1 -30 -1.8 3.95
 14 1 -29 -0.06 3.74
 14 -1 -29 2.51 3.86
 14 -1 -28 -1.2 3.65
 14 1 -28 -0.33 3.58
 14 1 -27 0.74 3.61
 14 -1 -27 5.88 5.52
 14 1 -26 -1.82 3.6
 14 -1 -26 -4.41 3.52
 14 1 -25 3.93 3.41
 14 -1 -25 -5.56 3.32
 14 -1 -24 -8.07 3.23
 14 1 -24 16.63 5.01
 -14 1 24 1.4 3.04
 14 1 -23 4.33 3.37
 14 -1 -23 9.66 3.42
 -14 1 23 6.5 4.72
 14 -1 -22 -6.8 3.12
 14 1 -22 5.07 3.09
 -14 1 22 0.52 2.87
 14 1 -21 3.14 3.08
 14 -1 -21 0.91 3.08
 -14 1 21 1.08 2.85
 14 -1 -20 7.7 3.26
 14 1 -20 7.3 3.13
 -14 1 20 7.22 4.93
 14 -1 -19 -3.7 2.99
 -14 -1 19 1.56 3.03
 -14 1 19 3.5 2.94
 14 1 -18 -9.53 4.29
 14 -1 -18 5.17 2.9
 -14 -1 18 3.46 1.99
 -14 1 18 4.43 2.96
 14 1 -17 8.94 2.84
 14 -1 -17 14.03 2.98
 -14 -1 17 7.09 2.28
 -14 1 17 3.78 4.7
 14 1 -16 4.37 2.47
 14 -1 -16 -0.79 2.55
 -14 -1 16 -1.02 2.01
 -14 1 16 4.28 2.77
 14 1 -15 12.56 2.78
 14 -1 -15 17.53 4.39
 -14 -1 15 11.66 2.36
 -14 1 15 14.29 4.83
 14 -1 -14 2.25 2.72
 14 1 -14 13.02 2.5
 -14 -1 14 10.28 3.28
 -14 1 14 6.75 2.99
 14 1 -13 36.78 3.44
 14 -1 -13 48.14 3.66
 -14 -1 13 34.95 3.07
 -14 1 13 42.05 3.96
 14 1 -12 -5.65 2.16
 14 -1 -12 -3.96 2.25
 -14 -1 12 0.48 1.98
 -14 1 12 0.01 2.44
 14 1 -11 7.58 3.19
 14 -1 -11 9.21 3.52
 -14 -1 11 5.51 3.09
 -14 1 11 1.34 2.48
 14 1 -10 -5.07 2.99
 14 -1 -10 -0.41 2.24
 -14 -1 10 3.28 1.87
 -14 1 10 4.84 2.4
 14 1 -9 20.14 2.33
 14 -1 -9 14.67 2.61
 -14 -1 9 17.94 2.31
 -14 1 9 16.53 2.84
 14 -1 -8 1.1 2.07
 14 1 -8 4.89 1.81
 -14 -1 8 0.52 1.86
 -14 1 8 1.84 2.31
 14 1 -7 23.28 2.36
 14 -1 -7 33.01 4.23
 -14 -1 7 25.59 2.5
 -14 1 7 26.42 3.03
 14 -1 -6 0.84 1.96
 14 1 -6 0.56 1.6
 -14 -1 6 4.22 1.79
 -14 1 6 -5.23 2.23
 14 1 -5 3.93 1.54
 14 -1 -5 2.03 1.99
 -14 -1 5 3.57 1.98
 -14 1 5 5.23 3.51
 14 1 -4 3.98 1.57
 14 -1 -4 7.63 2.02
 -14 -1 4 4.98 2.13
 -14 1 4 5.76 2.41
 14 1 -3 24.68 1.97
 14 -1 -3 23.7 3.77
 -14 -1 3 23.13 4.25
 -14 1 3 28.6 3.12
 14 1 -2 9.49 1.49
 14 -1 -2 8.23 2.04
 -14 -1 2 8.23 2.24
 -14 1 2 8.35 3.78
 14 1 -1 8.6 1.41
 14 -1 -1 8.03 1.97
 -14 -1 1 5.39 2.22
 -14 1 1 5.84 2.51
 14 -1 0 8.98 2.83
 14 1 0 4.71 1.27
 -14 -1 0 4.4 2.24
 -14 1 0 1.17 2.45
 14 1 1 26.93 1.66
 14 -1 1 23.85 2.53
 -14 -1 -1 31.07 4.64
 -14 1 -1 22.74 4.73
 14 1 2 2.16 1.05
 14 -1 2 3.08 1.7
 -14 -1 -2 -0.38 2.27
 -14 1 -2 2.13 2.32
 14 1 3 0.44 0.92
 14 -1 3 1.54 1.65
 -14 -1 -3 -2.14 2.29
 -14 1 -3 5.14 2.29
 14 -1 4 -0.6 2.56
 14 1 4 0.68 1.25
 -14 -1 -4 -1.3 2.39
 -14 1 -4 1.41 2.34
 14 1 5 0.9 1.11
 14 -1 5 2.47 1.67
 -14 -1 -5 -2.98 2.51
 -14 1 -5 3.71 2.53
 14 -1 6 0.91 1.67
 -14 -1 -6 1.61 3.78
 -14 1 -6 2.46 3.99
 -14 1 -6 -1.2 3.84
 14 -1 7 0.88 1.61
 -14 1 -7 6.19 2.75
 -14 -1 -7 -1.12 2.53
 14 -1 8 2.45 2.41
 -14 -1 -8 2.91 2.65
 -14 1 -8 2.76 2.8
 14 -1 9 -1.39 1.43
 -14 1 -9 1.91 2.77
 -14 -1 -9 -3.59 2.75
 14 -1 10 4.89 1.49
 -14 -1 -10 -2.84 2.98
 -14 1 -10 5.91 2.96
 -14 -1 -11 -8.79 3.14
 -14 1 -11 -5.19 3.17
 -14 1 -12 3.59 3.2
 -14 -1 -12 6.21 3.24
 -14 -1 -13 1.01 3.01
 -14 1 -13 -0.11 3.04
 -14 -1 -14 2.08 3.19
 -14 1 -14 1.94 4.97
 -14 -1 -15 -1.12 3.19
 -14 1 -15 6.87 4.98
 -14 -1 -16 -3.49 3.23
 -14 1 -16 5.64 4.96
 -14 -1 -17 5.84 3.4
 -14 1 -17 4.11 5.07
 -14 -1 -18 0.65 3.4
 -14 1 -18 -0.38 4.8
 -14 -1 -19 -7.2 3.52
 -14 1 -19 7.59 5.09
 -14 -1 -20 1.22 3.66
 -14 1 -20 -6.8 5.05
 -14 -1 -21 0.17 3.57
 -14 1 -21 -2.46 5.54
 -14 -1 -22 0.45 3.75
 -14 1 -22 0.65 5.55
 -14 -1 -23 -1.24 3.76
 -14 1 -23 2.7 5.62
 14 -2 -31 9.53 7.05
 14 -2 -30 -0.4 3.83
 14 -2 -29 -5.49 3.97
 14 -2 -28 -3.52 3.79
 14 -2 -27 -5.11 5.99
 14 -2 -26 2.08 3.46
 -14 2 26 -5.23 5.46
 14 -2 -25 7.87 3.58
 -14 2 25 1.68 3.58
 14 -2 -24 10.22 3.67
 -14 2 24 5.87 3.91
 14 -2 -23 7.2 5.43
 -14 2 23 5.64 5.75
 14 -2 -22 -8.71 3.44
 -14 2 22 -0.35 3.48
 14 -2 -21 5.45 3.11
 14 2 -21 -4.74 3.15
 -14 2 21 3.94 5.13
 14 -2 -20 -1.21 4.58
 14 2 -20 0.54 3.04
 -14 2 20 2.34 3.33
 14 -2 -19 5.53 3
 14 2 -19 -1.4 2.94
 -14 2 19 3.44 5.13
 14 -2 -18 4.3 3.02
 14 2 -18 9.09 3
 -14 2 18 0.33 3.51
 14 2 -17 3.26 3.05
 14 -2 -17 12.43 3.14
 -14 2 17 13.7 5.38
 -14 -2 17 9.72 1.92
 14 -2 -16 -1.92 4.3
 14 2 -16 2.97 2.54
 -14 2 16 1.37 3.11
 -14 -2 16 -0.19 1.62
 14 2 -15 4.11 2.64
 14 -2 -15 6.69 2.83
 -14 2 15 3.96 4.9
 -14 -2 15 4.46 1.76
 14 -2 -14 -1.2 2.61
 14 2 -14 -2.76 2.29
 -14 2 14 -1.81 3.03
 -14 -2 14 3.92 1.66
 14 -2 -13 10.24 4.57
 14 2 -13 12.55 2.68
 -14 2 13 10.87 5.3
 -14 -2 13 12.86 2.13
 14 -2 -12 -0.04 2.54
 14 2 -12 -1.67 2.19
 -14 2 12 4.06 2.8
 -14 -2 12 -1.29 2.69
 14 -2 -11 2.9 2.31
 14 2 -11 -0.85 2.01
 -14 2 11 -0.29 4.22
 -14 -2 11 0.13 1.7
 14 -2 -10 0.06 2.39
 14 2 -10 3.89 1.94
 -14 2 10 -1.59 2.6
 -14 -2 10 0.33 1.69
 14 -2 -9 8.23 3.66
 14 2 -9 2.85 1.94
 -14 2 9 -1.84 4.25
 -14 -2 9 1.86 1.71
 14 -2 -8 2.96 2.26
 14 2 -8 0.87 1.82
 -14 2 8 -1.46 2.59
 -14 -2 8 0.16 1.79
 14 -2 -7 4.22 2.47
 14 2 -7 11 1.9
 -14 2 7 7.76 2.79
 -14 -2 7 5.6 2.97
 14 -2 -6 12.13 3.33
 14 2 -6 1.17 1.67
 -14 2 6 0.95 3.92
 -14 -2 6 1.69 1.87
 14 -2 -5 2.35 2.24
 14 2 -5 2.43 1.6
 -14 2 5 5.91 2.53
 -14 -2 5 3.16 1.91
 14 -2 -4 10.76 2.26
 14 2 -4 8.49 1.52
 -14 2 4 0.31 2.6
 -14 -2 4 2.14 2.12
 14 2 -3 -1.81 1.38
 14 -2 -3 -3.99 2.08
 -14 -2 3 1.63 1.97
 -14 2 3 -2.13 2.53
 14 2 -2 7.04 1.41
 14 -2 -2 4.43 2.37
 -14 -2 2 5.46 2.31
 -14 2 2 7.17 2.73
 14 -2 -1 13.19 2.55
 -14 -2 1 13.74 3.77
 -14 2 1 18.56 3.06
 14 -2 0 51.04 3.75
 -14 -2 0 48.94 3.89
 -14 2 0 57.19 6.62
 14 -2 1 16.85 3.75
 -14 -2 -1 10.62 2.71
 -14 2 -1 13.81 3.1
 14 -2 2 80.94 4.56
 -14 -2 -2 69.98 4.97
 -14 2 -2 71.14 5.57
 14 -2 3 2.35 2.15
 -14 -2 -3 0.39 2.43
 -14 2 -3 3.19 2.74
 14 -2 4 9.34 3.56
 -14 -2 -4 2.99 4
 -14 2 -4 1.16 4.29
 14 -2 5 6.18 2.38
 -14 -2 -5 3.81 2.58
 -14 2 -5 -2.9 2.73
 14 -2 6 4.87 2.49
 -14 -2 -6 3.71 2.72
 -14 2 -6 1.37 2.92
 14 -2 7 1.38 2.64
 -14 -2 -7 1.48 2.77
 -14 2 -7 4.26 2.92
 14 -2 8 9.16 4.52
 -14 -2 -8 0.92 2.82
 -14 2 -8 3.23 2.95
 14 -2 9 1.8 2.99
 -14 -2 -9 1.01 2.92
 -14 2 -9 4.45 3.01
 14 -2 10 4.26 3.18
 -14 -2 -10 -3.02 3.11
 -14 2 -10 5.98 4.55
 14 -2 11 0.33 3.24
 -14 -2 -11 3.1 3.07
 -14 2 -11 0.83 4.59
 -14 -2 -12 -6.45 3.19
 -14 2 -12 0.24 2.95
 -14 -2 -13 -0.99 3.15
 -14 2 -13 1.55 2.98
 -14 -2 -14 2.97 3.24
 -14 2 -14 0.9 3.13
 -14 -2 -15 2.84 3.32
 -14 2 -15 0.11 3.04
 -14 -2 -16 3.11 3.35
 -14 2 -16 0.54 3.17
 -14 -2 -17 1.67 3.45
 -14 2 -17 2.07 3.2
 -14 -2 -18 4.15 3.42
 -14 2 -18 -2.02 3.15
 -14 -2 -19 -0.19 3.58
 -14 2 -19 1.22 3.19
 -14 -2 -20 0.3 3.8
 -14 2 -20 2.46 3.26
 -14 -2 -21 5.41 3.96
 -14 2 -21 3.29 3.63
 -14 -2 -22 4.38 4.04
 -14 2 -22 1.87 3.54
 14 -3 -29 3.7 3.9
 14 -3 -28 -5.15 4
 14 -3 -27 -0.77 5.82
 -14 3 27 4.67 4.04
 14 -3 -26 -0.28 3.57
 -14 3 26 6.85 6.5
 14 -3 -25 2.06 3.52
 -14 3 25 3.98 4.15
 14 -3 -24 11.77 3.72
 -14 3 24 3.41 7.05
 14 -3 -23 7.72 3.37
 -14 3 23 -4.43 4.26
 14 -3 -22 -1.4 3.34
 -14 3 22 -8.46 6.14
 14 -3 -21 6.94 3.36
 -14 3 21 4.47 3.97
 14 -3 -20 -1.96 5.15
 -14 3 20 0.49 5.7
 14 -3 -19 -5.41 3.31
 -14 3 19 0.55 3.82
 14 -3 -18 4.73 3.17
 -14 3 18 -2.05 3.84
 14 -3 -17 13.59 5.24
 -14 3 17 2.51 3.96
 14 -3 -16 -3.87 3.18
 -14 3 16 -1.44 3.69
 14 -3 -15 1.63 2.98
 -14 3 15 -0.27 3.49
 14 -3 -14 1.26 3.06
 -14 3 14 3.42 3.48
 -14 -3 14 1.51 2.06
 14 -3 -13 7.35 3.03
 -14 3 13 9.27 5.33
 -14 -3 13 4.07 1.48
 14 -3 -12 4.38 2.76
 -14 3 12 0.83 3.35
 -14 -3 12 1.17 1.46
 14 -3 -11 -1.61 2.7
 -14 3 11 6.54 3.34
 -14 -3 11 3.17 1.59
 14 -3 -10 -7.67 4.44
 -14 3 10 -1.16 3.3
 -14 -3 10 -2.86 2.69
 14 -3 -9 1.9 2.9
 -14 3 9 7.39 3.4
 -14 -3 9 6.69 1.83
 14 -3 -8 -1.57 2.85
 -14 3 8 1.73 4.67
 -14 -3 8 7.48 2.82
 14 -3 -7 3.34 4.19
 -14 3 7 6.41 3.08
 -14 -3 7 1.86 2
 14 -3 -6 3.68 2.77
 -14 3 6 -1.78 2.98
 -14 -3 6 0.08 1.97
 14 -3 -5 -0.1 2.85
 -14 3 5 -1.93 4.5
 -14 -3 5 -0.93 1.91
 14 -3 -4 3.3 2.98
 -14 3 4 5.39 3.05
 -14 -3 4 3.31 2.14
 14 -3 -3 0.85 2.72
 -14 3 3 -0.5 2.89
 -14 -3 3 0.16 2.08
 14 -3 -2 6.4 3.09
 -14 3 2 5.76 4.9
 -14 -3 2 5.25 3.52
 14 -3 -1 -2.42 2.89
 -14 3 1 2.8 2.82
 -14 -3 1 1.22 2.17
 14 -3 0 10.21 5.55
 -14 3 0 12.24 3.34
 -14 -3 0 10.05 2.65
 14 -3 1 0.06 3.23
 -14 3 -1 2.27 3.09
 -14 -3 -1 3.74 2.47
 14 -3 2 -1.01 3.42
 -14 3 -2 3.46 4.66
 -14 -3 -2 4.15 3.78
 14 -3 3 -3.34 5.41
 -14 3 -3 -0.81 2.94
 -14 -3 -3 9 4.07
 14 -3 4 1.59 3.74
 -14 3 -4 3.71 3.12
 -14 -3 -4 3.59 2.79
 14 -3 5 1.71 3.79
 -14 3 -5 0.47 2.97
 -14 -3 -5 -2.2 2.77
 14 -3 6 6.69 4.09
 -14 3 -6 3.4 3.27
 -14 -3 -6 2.92 3.03
 -14 3 -7 5.45 5.23
 -14 -3 -7 6.91 3.17
 -14 3 -8 0.81 3.29
 -14 -3 -8 4.33 3.1
 -14 3 -9 1.39 3.25
 -14 -3 -9 3.87 3.21
 -14 3 -10 2.28 3.21
 -14 -3 -10 -1.03 3.15
 -14 3 -11 -3.82 3.27
 -14 -3 -11 -5.39 3.47
 -14 3 -12 2.27 3.29
 -14 -3 -12 0.91 3.45
 -14 3 -13 1.47 3.45
 -14 -3 -13 5.74 3.49
 -14 3 -14 2.53 3.5
 -14 -3 -14 2.86 3.48
 -14 3 -15 3.64 5.43
 -14 -3 -15 1.68 3.63
 -14 3 -16 8.29 5.64
 -14 -3 -16 4.13 3.78
 -14 3 -17 0.22 5.27
 -14 -3 -17 1.13 3.67
 -14 3 -18 1.38 5.41
 -14 -3 -18 3.1 3.81
 -14 3 -19 2.53 5.47
 -14 -3 -19 -4.03 3.89
 -14 3 -20 1.51 5.41
 -14 -3 -20 1.7 4.05
 -14 3 -21 -1.13 5.47
 -14 -3 -21 0.46 4
 14 -4 -27 1.35 3.71
 -14 4 27 -4.48 4.5
 14 -4 -26 -7.98 5.71
 -14 4 26 9.69 4.38
 14 -4 -25 8.01 4.06
 -14 4 25 12.27 5.12
 14 -4 -24 -6.76 3.67
 -14 4 24 2.51 4.57
 14 -4 -23 -2.39 5.47
 -14 4 23 -0.8 6.91
 14 -4 -22 6.26 3.59
 -14 4 22 -6.41 4.51
 14 -4 -21 -4.36 3.62
 -14 4 21 5.86 6.85
 14 -4 -20 4.61 5.47
 -14 4 20 1.49 4.26
 14 -4 -19 -3.89 3.48
 -14 4 19 0.76 4.15
 14 -4 -18 10.86 3.95
 -14 4 18 8.9 4.67
 14 -4 -17 6.04 3.73
 -14 4 17 3.71 4.32
 14 -4 -16 1.38 3.54
 -14 4 16 5.31 6.42
 14 -4 -15 -6.14 3.54
 -14 4 15 4.29 4.05
 14 -4 -14 6.32 3.6
 -14 4 14 1.8 4.3
 14 -4 -13 -5.52 5.28
 -14 4 13 6.62 5.88
 14 -4 -12 -0.67 3.51
 -14 4 12 -0.27 3.89
 -14 -4 12 4.52 2.22
 14 -4 -11 2.27 3.52
 -14 4 11 1.61 3.75
 -14 -4 11 1.92 1.46
 14 -4 -10 16 5.62
 -14 4 10 2.59 3.95
 -14 -4 10 5.13 1.82
 14 -4 -9 7.48 3.68
 -14 4 9 5.27 3.76
 -14 -4 9 1.21 2.86
 14 -4 -8 1.82 3.74
 -14 4 8 1.89 3.75
 -14 -4 8 3.13 1.98
 14 -4 -7 -6.7 3.55
 -14 4 7 4.5 3.49
 -14 -4 7 1.23 1.97
 14 -4 -6 0.03 3.51
 -14 4 6 3.95 3.5
 -14 -4 6 -1.45 3.12
 14 -4 -5 4.49 4
 -14 4 5 11.64 3.91
 -14 -4 5 6.13 2.36
 14 -4 -4 -0.48 3.69
 -14 4 4 5.27 5.09
 -14 -4 4 -0.6 2.19
 14 -4 -3 8.62 6.29
 -14 4 3 3.74 3.64
 -14 -4 3 4.77 3.87
 14 -4 -2 3.68 4
 -14 4 2 -0.15 3.43
 -14 -4 2 -3.44 2.48
 14 -4 -1 1.5 4.43
 -14 4 1 4.45 3.62
 -14 -4 1 5.26 2.7
 14 -4 0 8.49 7.1
 -14 4 0 4.77 5.61
 -14 -4 0 6.13 2.84
 14 -4 1 7.14 4.84
 -14 4 -1 4.99 3.75
 -14 -4 -1 8.1 2.92
 14 -4 2 7.78 4.87
 -14 4 -2 1.68 3.63
 -14 -4 -2 7.6 4.64
 14 -4 3 1.53 4.66
 -14 4 -3 1.13 3.43
 -14 -4 -3 2.22 4.31
 14 -4 4 2.53 6.86
 -14 4 -4 6.93 5.33
 -14 -4 -4 -2.94 2.83
 -14 4 -5 1.42 3.3
 -14 -4 -5 -0.75 2.97
 -14 4 -6 6.67 3.54
 -14 -4 -6 2.79 3.25
 -14 4 -7 3.63 3.55
 -14 -4 -7 -0.58 3.11
 -14 4 -8 0.31 3.51
 -14 -4 -8 4.16 3.29
 -14 4 -9 3.58 3.58
 -14 -4 -9 -0.6 3.37
 -14 4 -10 3.7 5.14
 -14 -4 -10 -0.52 3.35
 -14 4 -11 1.64 5.35
 -14 -4 -11 0.67 3.33
 -14 4 -12 -2.09 3.41
 -14 -4 -12 1.95 3.22
 -14 4 -13 2.35 3.51
 -14 -4 -13 1.16 3.62
 -14 4 -14 -1.4 3.55
 -14 -4 -14 3.42 3.63
 -14 4 -15 2.54 3.79
 -14 -4 -15 7.59 3.84
 -14 4 -16 2.84 3.66
 -14 -4 -16 2.93 3.82
 -14 4 -17 -2.47 3.72
 -14 -4 -17 6.14 3.95
 -14 4 -18 5.37 3.7
 -14 -4 -18 -6.95 3.87
 -14 4 -19 3.47 3.88
 -14 -4 -19 -0.54 4.03
 14 -5 -25 -9.04 6.68
 -14 5 25 7.3 7.52
 14 -5 -24 -6.87 4.27
 -14 5 24 0.23 5.31
 14 -5 -23 -0.78 4.15
 -14 5 23 7.48 5.05
 14 -5 -22 2.81 6.54
 -14 5 22 8.94 7.86
 14 -5 -21 3.88 4.16
 -14 5 21 3.03 5.04
 14 -5 -20 0.12 4.08
 -14 5 20 1.14 4.68
 14 -5 -19 -5.89 6
 -14 5 19 6.36 6.98
 14 -5 -18 -2.74 3.89
 -14 5 18 5.91 4.47
 14 -5 -17 3.09 3.77
 -14 5 17 -1.15 4.5
 14 -5 -16 3.12 3.92
 -14 5 16 3.58 4.52
 14 -5 -15 2.72 4.35
 -14 5 15 16.86 4.9
 14 -5 -14 4.08 4.22
 -14 5 14 8.24 4.71
 14 -5 -13 -8.02 4.09
 -14 5 13 6.01 4.29
 14 -5 -12 -3.7 6.87
 -14 5 12 7.02 4.41
 14 -5 -11 -1.68 4.27
 -14 5 11 0.5 4.28
 14 -5 -10 5.91 4.5
 -14 5 10 -0.82 6.5
 14 -5 -9 -4.4 6.76
 -14 5 9 -8.75 4.12
 -14 -5 9 0.66 2.88
 14 -5 -8 0.02 4.37
 -14 5 8 -0.64 4.13
 -14 -5 8 2.02 1.94
 14 -5 -7 -7.16 4.33
 -14 5 7 1.87 5.94
 -14 -5 7 1.89 2.04
 14 -5 -6 6.48 4.44
 -14 5 6 -2.05 3.95
 -14 -5 6 0.54 2.28
 14 -5 -5 6.5 7.26
 -14 5 5 -2.01 3.98
 -14 -5 5 1.08 2.31
 14 -5 -4 -2.48 4.66
 -14 5 4 -5.86 4.01
 -14 -5 4 1.86 2.58
 14 -5 -3 10.05 4.91
 -14 5 3 2.95 6.26
 -14 -5 3 -1.05 4.06
 14 -5 -2 6.95 7.68
 -14 5 2 5.6 3.94
 -14 -5 2 0.12 2.69
 14 -5 -1 -2.13 5.09
 -14 5 1 2.97 3.95
 -14 -5 1 0.25 2.71
 14 -5 0 -0.7 4.96
 -14 5 0 0.58 3.96
 -14 -5 0 1.67 2.8
 14 -5 1 -0.66 5.06
 -14 5 -1 4.13 6.21
 -14 -5 -1 2.88 2.92
 14 -5 2 1.41 7.85
 -14 5 -2 3.05 3.85
 -14 -5 -2 0.48 2.95
 -14 5 -3 0.86 3.84
 -14 -5 -3 4.44 3.2
 -14 5 -4 5.68 4.07
 -14 -5 -4 7.36 5.14
 -14 5 -5 -0.86 3.95
 -14 -5 -5 4.63 5.24
 -14 5 -6 -2.87 3.92
 -14 -5 -6 -1.55 5.37
 -14 5 -7 13.72 6.48
 -14 -5 -7 2.27 5.63
 -14 5 -8 0.88 3.97
 -14 -5 -8 3.76 3.75
 -14 5 -9 2.59 3.96
 -14 -5 -9 0.98 3.67
 -14 5 -10 4.16 3.91
 -14 -5 -10 -2.27 3.68
 -14 5 -11 -2.46 3.9
 -14 -5 -11 4.93 3.82
 -14 5 -12 -2.04 3.94
 -14 -5 -12 -0.63 4.05
 -14 5 -13 1.47 3.91
 -14 -5 -13 0.12 6.07
 -14 5 -14 3.45 4.08
 -14 -5 -14 -2.91 6.25
 -14 5 -15 2.79 3.98
 -14 -5 -15 -6.25 6.26
 -14 5 -16 -0.44 6.36
 -14 -5 -16 0.3 6.04
 14 -6 -21 1.04 4.49
 -14 6 21 0.19 5.35
 14 -6 -20 -5.86 4.78
 -14 6 20 4.31 8.34
 14 -6 -19 3.6 4.41
 -14 6 19 -3.24 5.37
 14 -6 -18 9.45 4.59
 -14 6 18 3.01 5.64
 14 -6 -17 1.36 7.07
 -14 6 17 0.18 7.28
 14 -6 -16 5.01 5
 -14 6 16 6.12 5.18
 14 -6 -15 3.95 4.56
 -14 6 15 -3.34 4.93
 14 -6 -14 7.56 7.15
 -14 6 14 -6.38 7.15
 14 -6 -13 4.73 4.9
 -14 6 13 1.59 4.85
 14 -6 -12 0.38 4.92
 -14 6 12 8.14 4.86
 14 -6 -11 5.22 5.01
 -14 6 11 0.61 4.68
 14 -6 -10 6.96 7.83
 -14 6 10 3.52 7.4
 14 -6 -9 2.07 4.77
 -14 6 9 -0.7 4.42
 14 -6 -8 6.27 4.98
 -14 6 8 -1.46 4.54
 14 -6 -7 7.1 7.74
 -14 6 7 3.19 4.57
 -14 -6 7 2.28 2.46
 14 -6 -6 2.24 5.39
 -14 6 6 13.11 7.12
 -14 -6 6 2.38 3.99
 14 -6 -5 1.24 5.31
 -14 6 5 8.95 4.42
 -14 -6 5 3.11 2.59
 14 -6 -4 -5.75 5.06
 -14 6 4 -4.55 4.27
 -14 -6 4 2.4 2.65
 14 -6 -3 -2.27 8.6
 -14 6 3 4.65 4.47
 -14 -6 3 5.19 2.98
 14 -6 -2 12.21 5.58
 -14 6 2 16.67 7.04
 -14 -6 2 0.61 3.11
 14 -6 -1 4.82 5.55
 -14 6 1 6.07 4.38
 -14 -6 1 -1.8 4.94
 14 -6 0 -2.83 5.44
 -14 6 0 4.17 4.31
 -14 -6 0 1.59 3.27
 14 -6 1 12.4 8.6
 -14 6 -1 3.09 4.38
 -14 -6 -1 3.42 3.47
 -14 6 -2 2.8 4.33
 -14 -6 -2 0.43 3.39
 -14 6 -3 15.46 7.42
 -14 -6 -3 4.56 3.73
 -14 6 -4 9.91 4.72
 -14 -6 -4 3.18 3.74
 -14 6 -5 -0.18 4.45
 -14 -6 -5 4.06 3.66
 -14 6 -6 5.13 4.54
 -14 -6 -6 1.9 3.77
 -14 6 -7 7.01 4.6
 -14 -6 -7 7.34 4.25
 -14 6 -8 -1.68 4.58
 -14 -6 -8 3.82 3.85
 -14 6 -9 3.54 4.24
 -14 -6 -9 -4.04 3.94
 -14 6 -10 4.86 7.07
 -14 -6 -10 -5.47 4.16
 -14 6 -11 3.21 6.66
 -14 -6 -11 -0.98 4.09
 -14 6 -12 9.6 7.19
 -14 -6 -12 3.43 4.46
 14 -7 -14 8.69 5.67
 -14 7 14 -6.62 8.73
 14 -7 -13 4.11 5.67
 -14 7 13 4.42 5.57
 14 -7 -12 3.05 5.55
 -14 7 12 0.71 5.14
 14 -7 -11 4.05 8.31
 -14 7 11 0.96 5.04
 14 -7 -10 2.65 5.39
 -14 7 10 -6.17 7.8
 14 -7 -9 5.01 5.64
 -14 7 9 2.67 5.35
 14 -7 -8 0.88 8.28
 -14 7 8 4.41 5.29
 14 -7 -7 -10.13 5.59
 -14 7 7 5.13 4.97
 14 -7 -6 6.2 5.79
 -14 7 6 -2.53 7.83
 14 -7 -5 -6.08 5.61
 -14 7 5 3.91 4.96
 14 -7 -4 -9.37 8.61
 -14 7 4 3.11 4.91
 14 -7 -3 7.23 5.74
 -14 7 3 2.91 4.92
 -14 -7 3 -3.3 3.16
 14 -7 -2 -15.32 5.76
 -14 7 2 7.68 4.97
 -14 -7 2 -0.03 3.38
 14 -7 -1 -4.36 5.83
 -14 -7 1 -0.31 3.45
 14 -7 0 9.46 5.95
 -14 7 0 3.42 4.95
 -14 -7 0 1.62 3.71
 -14 7 -1 1.34 4.86
 -14 -7 -1 1.92 3.62
 -14 7 -2 1.37 4.71
 -14 -7 -2 -0.69 3.64
 -14 7 -3 1.28 4.98
 -14 -7 -3 2.62 3.9
 -14 7 -4 -1.49 4.88
 -14 -7 -4 4.08 5.93
 -14 7 -5 4.93 7.44
 -14 -7 -5 -2.53 6.11
 -14 7 -6 5.58 8.05
 -14 -7 -6 7.01 6.72
 15 0 -30 5.07 4.1
 15 0 -29 -0.6 3.88
 15 0 -28 2.89 3.89
 15 0 -27 -2.02 3.78
 15 0 -26 -5.3 5.91
 15 0 -25 12.32 4.01
 15 0 -24 8.4 3.71
 15 0 -23 -10.43 3.95
 15 0 -22 -3.32 3.38
 15 0 -21 4.99 4.93
 -15 0 21 0.63 2.72
 15 0 -20 0.8 3.09
 -15 0 20 5.59 3.99
 15 0 -19 3.76 3.12
 -15 0 19 5.39 2.71
 15 0 -18 -3.74 2.78
 -15 0 18 2.22 2.61
 15 0 -17 -3.88 2.76
 -15 0 17 8.56 3.94
 15 0 -16 13.56 4.66
 -15 0 16 9.95 3.08
 15 0 -15 -3.04 2.61
 -15 0 15 -0.87 2.56
 15 0 -14 16.91 3.03
 -15 0 14 11.76 4.58
 15 0 -13 0.86 2.4
 -15 0 13 1.33 2.43
 15 0 -12 -1.56 2.27
 -15 0 12 2.27 2.32
 15 0 -11 0.49 3.42
 -15 0 11 2.27 2.33
 15 0 -10 1.03 3.34
 -15 0 10 2.03 2.24
 15 0 -9 1.39 2.05
 -15 0 9 -3.42 2.26
 15 0 -8 0.89 2.01
 -15 0 8 -1.53 2.21
 15 0 -7 1.58 1.94
 -15 0 7 -4.41 2.3
 15 0 -6 1.5 1.97
 -15 0 6 6.44 3.5
 15 0 -5 -0.22 2.84
 -15 0 5 -0.45 2.11
 15 0 -4 27.72 2.42
 -15 0 4 19.83 3.02
 15 0 -3 -1.28 1.71
 -15 0 3 -0.74 3.39
 15 0 -2 90.68 4.04
 -15 0 2 93.66 5.51
 15 0 -1 0.6 1.57
 -15 0 1 1.23 2.24
 15 0 0 84.87 3.68
 -15 0 0 79.44 8.03
 15 0 1 0.06 2.2
 -15 0 -1 0.38 2.36
 15 0 2 4.12 2.26
 -15 0 -2 1.17 2.63
 15 0 3 1.54 2.1
 -15 0 -3 1.45 2.55
 15 0 4 0.59 1.28
 -15 0 -4 -1.45 4.09
 15 0 5 -2.23 1.22
 -15 0 -5 5.36 4.01
 15 0 6 14.57 1.43
 -15 0 -6 17.66 3.3
 -15 0 -7 2.26 2.84
 -15 0 -8 11.19 3.2
 -15 0 -9 5.89 3.19
 -15 0 -10 6.77 3.27
 -15 0 -11 -1.18 3.13
 -15 0 -12 1.75 3.18
 -15 0 -13 -1.52 3.2
 -15 0 -14 -0.46 4.84
 -15 0 -15 5.34 5.29
 -15 0 -16 3.86 5.34
 -15 0 -17 -3.16 5.34
 -15 0 -18 -3.99 5.44
 -15 0 -19 -11.09 6.05
 -15 0 -20 -2.54 5.76
 -15 0 -21 -1.77 5.64
 -15 0 -22 2.12 3.82
 15 1 -30 -3.92 3.88
 15 -1 -30 1.81 4.04
 15 1 -29 0.13 3.88
 15 -1 -29 -1.95 3.89
 15 1 -28 0.34 3.69
 15 -1 -28 -1.01 3.74
 15 1 -27 -0.43 3.64
 15 -1 -27 4.13 5.4
 15 1 -26 2.58 3.61
 15 -1 -26 0.46 3.57
 15 -1 -25 -6.48 3.53
 15 1 -25 -0.69 3.62
 15 1 -24 1.26 5.44
 15 -1 -24 5.17 3.49
 15 1 -23 11.05 3.45
 15 -1 -23 2.61 3.66
 -15 1 23 5.64 3.37
 15 1 -22 -6.56 3.36
 15 -1 -22 -3.18 5.18
 -15 1 22 -3.81 3.16
 15 -1 -21 14.11 3.32
 15 1 -21 1.93 3.41
 -15 1 21 2.93 5.27
 15 1 -20 2.53 3.06
 15 -1 -20 3.06 3.08
 -15 1 20 -7.35 3.09
 15 1 -19 2.59 3.07
 15 -1 -19 0.32 3.13
 -15 -1 19 3.93 2.29
 -15 1 19 2.32 4.95
 15 1 -18 5.99 4.51
 15 -1 -18 8.02 4.59
 -15 -1 18 1.17 2.29
 -15 1 18 1.77 3.09
 15 1 -17 16.92 4.59
 15 -1 -17 9.48 3.17
 -15 -1 17 0.17 3.54
 -15 1 17 4.79 3.3
 15 -1 -16 4.32 2.97
 15 1 -16 7.09 2.84
 -15 -1 16 4.9 2.4
 -15 1 16 6.78 3.16
 15 1 -15 10.39 2.8
 15 -1 -15 9.27 2.95
 -15 -1 15 6.52 2.45
 -15 1 15 3.77 3.16
 15 -1 -14 2.46 3.96
 15 1 -14 1.23 2.5
 -15 -1 14 0.52 2.11
 -15 1 14 -1.35 4.42
 15 1 -13 11.42 2.87
 15 -1 -13 10.66 3
 -15 -1 13 16.66 3.88
 -15 1 13 18.78 3.2
 15 1 -12 6.06 2.39
 15 -1 -12 2.98 2.54
 -15 -1 12 2.45 2.27
 -15 1 12 11.27 4.37
 15 -1 -11 23.93 3.02
 15 1 -11 16.97 2.78
 -15 -1 11 13.25 4.09
 -15 1 11 18.05 3.35
 15 1 -10 2.57 3.38
 15 -1 -10 8.87 3.66
 -15 -1 10 6.15 2.32
 -15 1 10 3.52 4.31
 15 1 -9 2.44 3.1
 15 -1 -9 -0.43 2.32
 -15 -1 9 2.41 2.04
 -15 1 9 6.25 2.55
 15 -1 -8 1.65 2.34
 15 1 -8 2.09 2.01
 -15 -1 8 6.47 2.07
 -15 1 8 5.34 2.64
 15 1 -7 -2.23 1.85
 15 -1 -7 2.63 2.21
 -15 -1 7 -1.56 3.11
 -15 1 7 -1.86 2.45
 15 -1 -6 6.55 3.68
 15 1 -6 5.9 1.96
 -15 -1 6 4.5 2.17
 -15 1 6 8.88 2.63
 15 1 -5 6.34 1.78
 15 -1 -5 4.99 2.3
 -15 -1 5 3.07 2.19
 -15 1 5 4.53 3.89
 15 -1 -4 1.31 2.15
 15 1 -4 3.44 1.7
 -15 -1 4 4.16 2.24
 -15 1 4 1.44 2.61
 15 1 -3 4.98 1.59
 15 -1 -3 2.82 2.12
 -15 -1 3 3.03 2.29
 -15 1 3 1.76 2.57
 15 1 -2 4.08 1.51
 15 -1 -2 -1.44 3.05
 -15 -1 2 2.94 3.62
 -15 1 2 2.21 4.12
 15 1 -1 1.52 1.42
 15 -1 -1 1.27 2.99
 -15 -1 1 4.71 2.31
 -15 1 1 4.53 2.57
 15 -1 0 2.22 1.96
 15 1 0 2.15 1.31
 -15 -1 0 0.64 2.35
 -15 1 0 0.15 2.5
 15 1 1 0.35 1.16
 15 -1 1 0.23 1.83
 -15 -1 -1 0.63 2.39
 -15 1 -1 -2.66 2.56
 15 -1 2 -0.5 1.77
 15 1 2 1.33 1.69
 -15 -1 -2 3.58 3.69
 -15 1 -2 2.79 3.94
 15 1 3 0.14 1.42
 15 -1 3 2.46 2.77
 -15 -1 -3 6.5 4.05
 -15 1 -3 2.01 2.48
 15 -1 4 -0.33 1.75
 -15 1 -4 3.55 2.66
 -15 -1 -4 2.13 2.68
 15 -1 5 4.68 1.77
 -15 -1 -5 3.99 2.7
 -15 1 -5 3.74 2.82
 15 -1 6 2.03 1.71
 -15 -1 -6 6.03 2.92
 -15 1 -6 2.7 2.87
 15 -1 7 1.66 2.47
 -15 -1 -7 -3.34 3.01
 -15 1 -7 8.8 2.86
 15 -1 8 -0.04 2.33
 -15 -1 -8 1.27 2.9
 -15 1 -8 -0.89 4.69
 -15 -1 -9 -3.26 3.09
 -15 1 -9 -1.74 3.01
 -15 -1 -10 4.15 5.04
 -15 1 -10 5.11 3.33
 -15 -1 -11 7.28 5.03
 -15 1 -11 1.65 3.28
 -15 1 -12 0.51 3.26
 -15 -1 -12 -7.31 4.94
 -15 -1 -13 0.98 3.42
 -15 1 -13 5.42 3.39
 -15 -1 -14 0.09 3.29
 -15 1 -14 -0.81 3.2
 -15 -1 -15 0.19 3.32
 -15 1 -15 -0.36 3.24
 -15 1 -16 1 3.39
 -15 -1 -16 2.66 3.47
 -15 -1 -17 0.35 3.5
 -15 1 -17 -3.13 3.48
 -15 -1 -18 -4.21 3.68
 -15 1 -18 -4.89 3.65
 -15 -1 -19 1.4 5.63
 -15 1 -19 2.3 3.74
 -15 1 -20 -0.79 3.74
 -15 -1 -20 4.77 5.65
 -15 -1 -21 6.52 5.87
 -15 1 -21 -2.16 3.77
 15 -2 -29 -0.7 3.88
 15 -2 -28 4.03 3.95
 15 -2 -27 -1.94 5.81
 15 -2 -26 3.91 3.76
 15 -2 -25 -3.17 3.52
 -15 2 25 -2.01 3.87
 15 -2 -24 5.46 3.38
 -15 2 24 -1.19 3.81
 15 -2 -23 3.72 4.99
 -15 2 23 -1.76 3.6
 15 -2 -22 -2.03 3.27
 -15 2 22 4.9 3.56
 15 2 -21 13.13 3.37
 15 -2 -21 5.5 3.33
 -15 2 21 -3.46 3.67
 15 2 -20 10.81 3.34
 15 -2 -20 3.71 3.49
 -15 2 20 10.92 6
 15 -2 -19 -2.9 5.01
 -15 2 19 4.57 3.6
 15 2 -18 4 2.97
 15 -2 -18 4.46 3.05
 -15 2 18 -3.41 5.45
 15 2 -17 1.66 2.86
 15 -2 -17 3.14 2.96
 -15 2 17 2.72 3.3
 15 2 -16 7.24 2.83
 15 -2 -16 -1.29 2.89
 -15 2 16 12.35 5.33
 -15 -2 16 0.92 3
 15 2 -15 5.83 2.58
 15 -2 -15 3.24 2.99
 -15 -2 15 1.9 1.85
 -15 2 15 -0.79 3.32
 15 2 -14 5.46 2.48
 15 -2 -14 0.74 2.77
 -15 2 14 1.39 3.26
 -15 -2 14 -0.23 1.92
 15 2 -13 -0.61 2.37
 15 -2 -13 6.36 2.74
 -15 -2 13 0.21 1.94
 -15 2 13 2.47 3.25
 15 -2 -12 -3.67 4.13
 15 2 -12 1.95 2.33
 -15 -2 12 2.68 3.12
 -15 2 12 -0.53 3.17
 15 2 -11 -0.8 2.19
 15 -2 -11 1.96 2.59
 -15 -2 11 -0.77 1.97
 -15 2 11 -1.35 3
 15 2 -10 1.89 2.21
 15 -2 -10 -0.66 2.57
 -15 -2 10 1.45 2.99
 -15 2 10 0.31 2.96
 15 2 -9 -1.47 2.03
 15 -2 -9 -3.12 2.55
 -15 -2 9 0.44 1.76
 -15 2 9 -0.96 4.47
 15 2 -8 4.13 2.1
 15 -2 -8 2.53 4.04
 -15 2 8 10.27 3.09
 -15 -2 8 2.54 3.16
 15 2 -7 3.59 1.87
 15 -2 -7 -1.21 2.42
 -15 -2 7 0.06 2.01
 -15 2 7 -2.42 2.87
 15 2 -6 4.37 1.87
 15 -2 -6 1.49 2.37
 -15 -2 6 3.58 3.33
 -15 2 6 1.44 2.82
 15 2 -5 -0.09 1.71
 15 -2 -5 1.33 2.29
 -15 -2 5 2.58 2.09
 -15 2 5 0.95 2.83
 15 2 -4 2.67 1.75
 15 -2 -4 13.36 3.84
 -15 2 4 9.08 2.92
 -15 -2 4 3.16 2.29
 15 2 -3 0.71 1.55
 15 -2 -3 7.32 2.31
 -15 -2 3 3.58 3.6
 -15 2 3 5.36 2.85
 15 2 -2 52.45 2.72
 15 -2 -2 70.57 4.39
 -15 -2 2 61.83 4.34
 -15 2 2 64.42 5.07
 15 -2 -1 8.82 3.63
 -15 -2 1 4.2 2.45
 -15 2 1 2.71 2.96
 15 -2 0 15.2 2.8
 -15 -2 0 19.74 3.04
 -15 2 0 25.53 5.61
 15 -2 1 1.36 2.3
 -15 -2 -1 8.66 3.8
 -15 2 -1 -3.42 2.88
 15 -2 2 9.68 2.51
 -15 -2 -2 9.02 2.92
 -15 2 -2 7.96 3.34
 15 -2 3 2.26 3.5
 -15 -2 -3 0.4 2.65
 -15 2 -3 3.63 3.05
 15 -2 4 4.56 2.29
 -15 -2 -4 5.82 2.83
 -15 2 -4 6.45 5.03
 15 -2 5 3.63 2.28
 -15 -2 -5 0.21 2.8
 -15 2 -5 2.82 4.59
 15 -2 6 24.88 3.01
 -15 2 -6 17.04 3.72
 -15 -2 -6 14.71 3.62
 15 -2 7 -1.76 3.72
 -15 -2 -7 4.62 4.45
 -15 2 -7 2.5 3.05
 15 -2 8 2.8 2.58
 -15 -2 -8 2.55 4.54
 -15 2 -8 -0.79 3.11
 15 -2 9 -2.55 2.68
 -15 -2 -9 0.15 4.71
 -15 2 -9 -0.09 3.2
 15 -2 10 -1.21 2.93
 -15 2 -10 4.06 3.31
 -15 -2 -10 4.57 3.12
 -15 -2 -11 0.6 3.14
 -15 2 -11 -0.74 4.89
 -15 -2 -12 3.24 3.39
 -15 2 -12 -2.32 5.02
 -15 -2 -13 -2.45 3.26
 -15 2 -13 4.83 4.78
 -15 -2 -14 1.24 3.37
 -15 2 -14 -3.04 3.26
 -15 -2 -15 2.29 3.61
 -15 2 -15 7.96 3.38
 -15 -2 -16 -1.06 3.55
 -15 2 -16 -1.19 3.3
 -15 -2 -17 -0.27 3.59
 -15 2 -17 1.61 3.3
 -15 -2 -18 1.48 3.72
 -15 2 -18 0.18 3.39
 -15 -2 -19 -5.23 3.8
 -15 2 -19 2.62 3.43
 -15 -2 -20 0.08 5.92
 -15 2 -20 1.48 3.58
 15 -3 -28 1.89 3.93
 15 -3 -27 14.3 6.62
 -15 3 27 1.4 7.2
 15 -3 -26 -2.09 3.73
 -15 3 26 8.23 4.39
 15 -3 -25 8.04 3.99
 -15 3 25 10.46 7.26
 15 -3 -24 7.02 3.67
 -15 3 24 -0.02 4.38
 15 -3 -23 6.6 5.43
 -15 3 23 -1.48 6.65
 15 -3 -22 6.4 3.6
 -15 3 22 5.76 4.31
 15 -3 -21 3.94 3.43
 -15 3 21 2.75 4.17
 15 -3 -20 3.65 3.37
 -15 3 20 9.29 4.26
 15 -3 -19 -2.54 3.26
 -15 3 19 -0.24 3.9
 15 -3 -18 3.2 3.35
 -15 3 18 0.7 3.91
 15 -3 -17 4.69 3.41
 -15 3 17 2.18 3.94
 15 -3 -16 5.33 5.41
 -15 3 16 11.76 6.49
 15 -3 -15 4.56 3.12
 -15 3 15 -4.28 3.56
 15 -3 -14 -0.18 3.11
 -15 -3 14 -1.79 1.56
 -15 3 14 -1.12 5.64
 15 -3 -13 6.32 3.06
 -15 -3 13 1.38 1.57
 -15 3 13 6.37 3.69
 15 -3 -12 6.94 3.06
 -15 -3 12 3.16 1.67
 -15 3 12 7.46 3.61
 15 -3 -11 -4.27 2.98
 -15 -3 11 0.96 2.54
 -15 3 11 -8.05 5.44
 15 -3 -10 4.69 3
 -15 -3 10 4.95 1.93
 -15 3 10 1.12 3.64
 -15 -3 9 2.88 2.84
 -15 3 9 -1.79 3.41
 15 -3 -8 4.73 3.2
 -15 -3 8 5.47 2.15
 -15 3 8 10.93 3.41
 15 -3 -7 2.9 2.96
 -15 -3 7 2.24 3.18
 -15 3 7 3.05 3.35
 15 -3 -6 -2.46 2.93
 -15 -3 6 3.38 2.2
 -15 3 6 2.22 3.2
 15 -3 -5 7.64 3.24
 -15 -3 5 6.52 2.45
 -15 3 5 4.59 3.44
 15 -3 -4 3.28 3.1
 -15 -3 4 1.41 3.67
 -15 3 4 5.52 3.27
 15 -3 -3 0.46 3.01
 -15 -3 3 0.05 2.33
 -15 3 3 2.04 3.2
 15 -3 -2 1.76 4.69
 -15 -3 2 -2.06 2.33
 -15 3 2 6.24 4.66
 15 -3 -1 0.81 3.07
 -15 -3 1 0.71 2.41
 -15 3 1 -1.82 3.14
 15 -3 0 -0.98 3.29
 -15 -3 0 4.67 3.88
 -15 3 0 0.98 3.05
 15 -3 1 2.81 3.27
 -15 -3 -1 -0.47 2.67
 -15 3 -1 1.18 3.08
 15 -3 2 0.42 5.55
 -15 3 -2 4.9 4.87
 -15 -3 -2 -4.42 2.68
 15 -3 3 4.69 3.66
 -15 -3 -3 -0.28 2.83
 -15 3 -3 0.52 3.24
 15 -3 4 0.96 3.83
 -15 -3 -4 3.08 2.8
 -15 3 -4 -5.92 3.2
 15 -3 5 2.62 3.95
 -15 -3 -5 4.79 2.82
 -15 3 -5 -0.93 3.37
 15 -3 6 13.42 6.99
 -15 3 -6 9.07 3.72
 -15 -3 -6 10.32 3.46
 15 -3 7 1.65 4.11
 -15 -3 -7 -1.54 4.79
 -15 3 -7 0.86 5.07
 15 -3 8 6.43 4.43
 -15 3 -8 5.15 5.59
 15 -3 9 -0.03 4.19
 -15 -3 -9 -0.72 5.24
 -15 3 -9 -3.68 3.45
 15 -3 10 4.4 6.95
 -15 -3 -10 4.17 5.69
 -15 3 -10 6.85 3.68
 -15 -3 -11 -2.55 5.39
 -15 3 -11 -1.99 3.61
 -15 -3 -12 5.93 3.6
 -15 3 -12 3.31 3.66
 -15 -3 -13 -1.83 3.64
 -15 3 -13 -4.27 3.51
 -15 -3 -14 -1.02 3.59
 -15 3 -14 -0.53 3.55
 -15 3 -15 -0.75 3.66
 -15 -3 -15 5.02 3.78
 -15 -3 -16 0.76 5.95
 -15 3 -16 1.84 3.7
 -15 -3 -17 10.61 6.38
 -15 3 -17 3.73 3.98
 -15 -3 -18 4.54 6.83
 -15 3 -18 8.37 6.44
 -15 3 -19 0.73 5.89
 -15 -3 -19 -3.26 6.2
 15 -4 -26 -5.4 6.35
 -15 4 26 -4.22 5.05
 15 -4 -25 1.11 3.76
 -15 4 25 -1.33 4.73
 15 -4 -24 -3.45 3.86
 -15 4 24 -11.4 7.6
 15 -4 -23 1.16 3.65
 -15 4 23 0.98 4.69
 15 -4 -22 -1.71 3.77
 -15 4 22 6.22 4.68
 15 -4 -21 8.7 3.76
 -15 4 21 -1.79 4.49
 15 -4 -20 8.13 3.75
 -15 4 20 -1.79 4.49
 15 -4 -19 7.72 6.21
 -15 4 19 12.26 7.35
 15 -4 -18 3.5 3.53
 -15 4 18 -4.23 4.26
 15 -4 -17 0.85 3.49
 -15 4 17 -1.29 4.15
 15 -4 -16 6.15 5.6
 -15 4 16 0.45 4.15
 15 -4 -15 3.06 3.6
 -15 4 15 2.5 4.28
 15 -4 -14 5.12 3.76
 -15 4 14 -0.01 6.47
 15 -4 -13 3.11 3.44
 -15 4 13 -3.27 4.07
 15 -4 -12 -2.54 5.78
 -15 4 12 5.9 4.09
 15 -4 -11 9.23 3.72
 -15 -4 11 1.62 1.74
 -15 4 11 2.52 6.34
 15 -4 -10 4.18 3.68
 -15 -4 10 0.59 1.73
 -15 4 10 3.1 3.87
 15 -4 -9 6.25 5.8
 -15 -4 9 3.35 1.94
 -15 4 9 -1.66 3.9
 15 -4 -8 1.94 3.86
 -15 4 8 6.34 5.92
 -15 -4 8 1.98 2.05
 15 -4 -7 4.57 3.95
 -15 -4 7 0.91 2.16
 -15 4 7 5.86 3.92
 15 -4 -6 7.17 4.37
 -15 -4 6 8.08 2.51
 -15 4 6 9.69 4.18
 15 -4 -5 -0.19 6.38
 -15 -4 5 1.16 2.37
 -15 4 5 8.59 3.88
 15 -4 -4 1.63 3.93
 -15 -4 4 -0.29 2.38
 -15 4 4 6.19 3.7
 15 -4 -3 11.33 4.19
 -15 -4 3 2.44 2.5
 -15 4 3 0.48 3.81
 15 -4 -2 9.56 4.38
 -15 -4 2 4.08 2.66
 -15 4 2 0.26 3.8
 15 -4 -1 36 5.87
 -15 -4 1 15.44 3.37
 -15 4 1 25.16 7.39
 15 -4 0 17.71 4.9
 -15 -4 0 7.85 4.98
 -15 4 0 5.24 4.07
 15 -4 1 4.07 4.76
 -15 -4 -1 6.01 3.16
 -15 4 -1 7.77 3.9
 15 -4 2 -4.18 7.3
 -15 -4 -2 1.97 2.96
 -15 4 -2 0.98 3.64
 15 -4 3 -0.84 4.96
 -15 -4 -3 3.27 2.98
 -15 4 -3 1.59 3.83
 15 -4 4 -0.37 4.74
 -15 4 -4 -1.22 5.69
 -15 -4 -4 0.86 3.03
 15 -4 5 9.02 5.17
 -15 -4 -5 1.92 3.44
 -15 4 -5 5.05 3.69
 15 -4 6 5.13 4.94
 -15 -4 -6 4.33 3.31
 -15 4 -6 0.25 3.63
 -15 -4 -7 1.94 3.18
 -15 4 -7 -3.47 3.49
 -15 4 -8 -1.43 3.69
 -15 -4 -8 -0.58 3.43
 -15 -4 -9 1.34 3.48
 -15 4 -9 -0.07 3.54
 -15 -4 -10 2.33 5.5
 -15 4 -10 -3.58 3.71
 -15 -4 -11 1.97 5.77
 -15 4 -11 4.94 5.7
 -15 -4 -12 3.16 5.74
 -15 4 -12 2.94 5.96
 -15 -4 -13 -1.12 5.93
 -15 4 -13 2.38 3.76
 -15 -4 -14 -4.47 5.94
 -15 4 -14 1.64 3.71
 -15 -4 -15 1.6 4.12
 -15 4 -15 5.69 4.07
 -15 4 -16 -0.05 3.84
 -15 -4 -16 0.32 3.91
 -15 -4 -17 -1.66 4.14
 -15 4 -17 1.91 3.84
 15 -5 -23 9.33 4.64
 -15 5 23 4.98 8.8
 15 -5 -22 -5.67 4.19
 -15 5 22 4.36 5.22
 15 -5 -21 -3.37 4.23
 -15 5 21 0.15 5.07
 15 -5 -20 -2.03 4.24
 -15 5 20 11.82 7.42
 15 -5 -19 3.27 4.3
 -15 5 19 4.58 4.89
 15 -5 -18 -4.77 6.7
 -15 5 18 -1.87 4.8
 15 -5 -17 6.98 4.23
 -15 5 17 -4.63 7.46
 15 -5 -16 3.66 4.02
 -15 5 16 -5.64 4.38
 15 -5 -15 3 6.28
 -15 5 15 0.11 4.49
 15 -5 -14 3.11 4.37
 -15 5 14 6.22 7.09
 15 -5 -13 -2.54 4.11
 -15 5 13 -0.98 4.42
 15 -5 -12 0.16 4.25
 -15 5 12 2.76 4.39
 15 -5 -11 5.64 7.3
 15 -5 -10 1.59 4.58
 -15 5 10 0.99 4.26
 15 -5 -9 8.48 4.53
 -15 -5 9 -0.14 2.12
 -15 5 9 4.55 4.16
 15 -5 -8 -2.05 4.66
 -15 -5 8 0.48 2.07
 -15 5 8 5.95 4.03
 15 -5 -7 -1.06 4.67
 -15 5 7 11.58 4.29
 -15 -5 7 2.94 2.3
 15 -5 -6 8.32 4.84
 -15 -5 6 1.14 2.4
 -15 5 6 3.62 4.26
 15 -5 -5 2.74 4.57
 -15 -5 5 -1.37 2.38
 -15 5 5 0.89 4.09
 15 -5 -4 19.37 7.75
 -15 -5 4 2.71 4.3
 -15 5 4 3.85 6.95
 15 -5 -3 -3.36 4.96
 -15 -5 3 -0.09 2.66
 -15 5 3 2.61 3.94
 15 -5 -2 -6.87 4.84
 -15 -5 2 -0.76 2.85
 -15 5 2 1.2 4.14
 15 -5 -1 4.67 5.04
 -15 -5 1 -2.2 2.91
 -15 5 1 7.23 4.09
 15 -5 0 -12.26 7.93
 -15 -5 0 -0.95 3.04
 -15 5 0 2.04 4.24
 15 -5 1 5.28 5.14
 -15 -5 -1 0.67 4.68
 -15 5 -1 -7.33 6.27
 15 -5 2 -1.66 5.17
 -15 -5 -2 -6.69 4.75
 -15 5 -2 2.93 3.81
 15 -5 3 5.75 5.41
 -15 -5 -3 -1.75 3.19
 -15 5 -3 -7.23 3.92
 15 -5 4 3.79 5.47
 -15 -5 -4 1.63 3.25
 -15 5 -4 0.98 4.08
 -15 -5 -5 2.19 3.36
 -15 5 -5 -0.15 3.92
 -15 -5 -6 0.93 3.31
 -15 5 -6 -1.32 6.14
 -15 -5 -7 4.05 3.6
 -15 5 -7 4.54 6.36
 -15 -5 -8 -1.59 3.59
 -15 5 -8 5.54 4.03
 -15 -5 -9 -0.47 3.68
 -15 5 -9 -1.62 4.01
 -15 -5 -10 1.49 3.72
 -15 5 -10 0.85 4.06
 -15 -5 -11 3.02 3.89
 -15 5 -11 3.46 4.15
 -15 -5 -12 2.59 4.01
 -15 5 -12 2.6 4.24
 -15 5 -13 -0.3 4.25
 -15 -5 -13 1.98 3.98
 -15 -5 -14 2.65 4.08
 -15 5 -14 -1.11 4.34
 15 -6 -19 -5.47 4.92
 -15 6 19 -4.36 5.71
 15 -6 -18 -0.22 5.04
 -15 6 18 14.47 8.53
 15 -6 -17 0.99 4.72
 -15 6 17 3.46 5.14
 15 -6 -16 0 7.77
 -15 6 16 6.92 5.35
 15 -6 -15 8.19 5.19
 -15 6 15 -3 8.01
 15 -6 -14 2.96 5.02
 -15 6 14 2.79 5.08
 15 -6 -13 -6.54 7.67
 -15 6 13 3.81 4.83
 15 -6 -12 5.48 5.46
 -15 6 12 5 5.11
 15 -6 -11 0.37 5.21
 -15 6 11 4.08 7.37
 15 -6 -10 -6.4 5.15
 -15 6 10 4.16 4.74
 15 -6 -9 -0.28 8.09
 -15 6 9 3.78 4.82
 15 -6 -8 5.91 5.32
 -15 6 8 3.52 4.85
 15 -6 -7 16.61 5.84
 -15 6 7 4.76 8.09
 15 -6 -6 8.86 5.52
 -15 -6 6 5.21 2.85
 -15 6 6 -0.3 4.64
 15 -6 -5 -2.59 8.3
 -15 -6 5 1.73 2.81
 -15 6 5 2.37 4.53
 15 -6 -4 5.96 5.58
 -15 -6 4 0.59 2.76
 -15 6 4 1.57 4.45
 15 -6 -3 3.42 5.8
 -15 -6 3 4.2 4.74
 -15 6 3 6.19 7.32
 15 -6 -2 -1.55 5.43
 -15 -6 2 0.67 2.91
 -15 6 2 -0.9 4.38
 15 -6 -1 10.29 9.02
 -15 -6 1 4.24 3.2
 -15 6 1 1.91 4.45
 15 -6 0 5.95 5.81
 -15 6 0 2.9 4.64
 -15 -6 0 1.4 3.27
 15 -6 1 4.2 5.79
 -15 -6 -1 1.79 3.36
 -15 6 -1 3.7 4.61
 15 -6 2 6.4 5.77
 -15 -6 -2 3.07 3.56
 -15 6 -2 9.15 7.6
 15 -6 3 16.9 9.13
 -15 -6 -3 2.47 3.63
 -15 6 -3 12.14 7.33
 -15 -6 -4 1.18 3.44
 -15 6 -4 -1.79 4.39
 -15 -6 -5 8.56 5.91
 -15 6 -5 -0.31 4.64
 -15 -6 -6 3.09 5.72
 -15 6 -6 -2.7 4.54
 -15 -6 -7 11.44 6.43
 -15 6 -7 4.42 5
 -15 -6 -8 7.24 6.4
 -15 6 -8 1.33 4.97
 -15 -6 -9 6.08 6.62
 -15 6 -9 0.25 7.53
 -15 -6 -10 -0.59 6.43
 -15 6 -10 -1.27 7.1
 15 -7 -10 19.82 9.35
 -15 7 10 0.04 5.64
 15 -7 -9 15.76 6.49
 -15 7 9 6.74 6.1
 15 -7 -8 -8.98 5.69
 -15 7 8 4.59 5.2
 15 -7 -7 1.6 5.67
 -15 7 7 1.24 8.05
 15 -7 -6 -16.62 9.18
 -15 7 6 2.43 5.44
 15 -7 -5 -11.24 6.11
 -15 7 5 -0.32 5.56
 15 -7 -4 4.02 6.19
 -15 7 4 1.01 5.19
 15 -7 -3 -4.31 6.04
 -15 7 3 -0.32 5.28
 15 -7 -2 8.9 8.71
 -15 -7 2 -1.7 3.33
 15 -7 -1 -1.18 6.42
 -15 -7 1 4.44 3.6
 -15 7 1 5.77 5.25
 15 -7 0 -5.3 5.98
 -15 -7 0 1.77 5.44
 -15 7 0 0.35 5.13
 15 -7 1 3.57 6.19
 -15 -7 -1 3.88 5.88
 -15 7 -1 1.97 5.13
 16 0 -29 2.86 4.11
 16 0 -28 0.28 3.87
 16 0 -27 -3.48 3.93
 16 0 -26 -4.28 6.05
 16 0 -25 -5.31 3.85
 16 0 -24 10.37 4.03
 16 0 -23 3.07 3.43
 16 0 -22 -8.04 3.82
 16 0 -21 -8.04 5.54
 16 0 -20 12.2 5.26
 -16 0 20 2.47 2.91
 16 0 -19 3.57 2.99
 -16 0 19 -1.88 4.38
 16 0 -18 2.35 3.18
 -16 0 18 2.59 2.88
 16 0 -17 -8.26 3
 -16 0 17 1.19 2.9
 16 0 -16 3.62 2.75
 -16 0 16 -6.47 4.26
 16 0 -15 10.24 4.52
 -16 0 15 3.25 2.9
 16 0 -14 5.91 2.98
 -16 0 14 9.48 2.97
 16 0 -13 2.23 2.66
 -16 0 13 3.08 2.75
 16 0 -12 6.1 2.72
 -16 0 12 6.87 2.81
 16 0 -11 4.23 2.44
 -16 0 11 -0.36 2.65
 16 0 -10 5.43 3.94
 -16 0 10 4.45 2.61
 16 0 -9 6.9 3.45
 -16 0 9 0.75 2.48
 16 0 -8 2.98 2.32
 -16 0 8 7.94 3.97
 16 0 -7 2.03 2.13
 -16 0 7 1.17 2.55
 16 0 -6 1.65 2.15
 -16 0 6 4.01 2.62
 16 0 -5 0.42 1.99
 -16 0 5 2.48 2.46
 16 0 -4 14.63 2.26
 -16 0 4 7.65 2.9
 16 0 -3 4.84 2.89
 -16 0 3 2.44 2.61
 16 0 -2 10.91 2.95
 -16 0 2 2.34 2.61
 16 0 -1 1.66 1.7
 -16 0 1 0.05 2.52
 16 0 0 70.07 3.52
 -16 0 0 65.14 5.06
 16 0 1 -2.94 1.51
 -16 0 -1 9.22 3.93
 16 0 2 4.15 1.51
 -16 0 -2 4.49 2.94
 16 0 3 -0.58 1.37
 -16 0 -3 -2.38 2.84
 16 0 4 9.32 1.51
 -16 0 -4 11.74 3.35
 -16 0 -5 -1.23 2.99
 -16 0 -6 9.35 3.47
 -16 0 -7 1.7 4.73
 -16 0 -8 -1.41 3.13
 -16 0 -9 2.73 3.24
 -16 0 -10 5.43 3.29
 -16 0 -11 -2.03 3.32
 -16 0 -12 -1.07 3.17
 -16 0 -13 3.3 3.57
 -16 0 -14 -0.12 3.28
 -16 0 -15 1.49 3.5
 -16 0 -16 2.89 3.6
 -16 0 -17 -1.44 3.61
 -16 0 -18 3.7 3.75
 -16 0 -19 -1.75 3.92
 -16 0 -20 -0.17 3.8
 16 1 -29 -2.79 4.22
 16 -1 -29 6.12 4.04
 16 1 -28 0.19 4.05
 16 -1 -28 -1.82 3.88
 16 1 -27 -0.34 3.88
 16 -1 -27 3.18 3.84
 16 -1 -26 -3.77 3.64
 16 1 -26 1.85 3.64
 16 1 -25 5.21 3.87
 16 -1 -25 8.11 3.79
 16 1 -24 -0.15 5.42
 16 -1 -24 -2.18 3.49
 16 1 -23 -6.84 3.36
 16 -1 -23 4.24 3.38
 16 1 -22 13.84 3.52
 16 -1 -22 9.55 5.62
 -16 1 22 -1.17 3.54
 16 1 -21 -4.42 3.33
 16 -1 -21 -1.28 3.35
 -16 1 21 -0.12 3.33
 16 1 -20 -8.22 3.34
 16 -1 -20 -2.44 3.44
 -16 1 20 3.61 5.23
 16 1 -19 -8.19 3.14
 16 -1 -19 3.73 3.18
 -16 1 19 -1.88 3.22
 16 -1 -18 12.03 4.78
 16 1 -18 -12.21 4.84
 -16 -1 18 2.4 2.47
 -16 1 18 -0.08 4.93
 16 1 -17 -4.72 4.53
 16 -1 -17 3.46 3
 -16 -1 17 1.03 2.36
 -16 1 17 4.06 3.25
 16 -1 -16 3.03 3.06
 16 1 -16 2.68 2.86
 -16 -1 16 1.3 3.78
 -16 1 16 3.59 4.95
 16 1 -15 -0.19 2.78
 16 -1 -15 5.6 2.96
 -16 -1 15 0.46 2.45
 -16 1 15 6.86 3.25
 16 1 -14 7.52 2.89
 16 -1 -14 3.75 3.06
 -16 -1 14 6.65 2.52
 -16 1 14 13.45 5.01
 16 1 -13 4.63 2.72
 16 -1 -13 -0.4 4.38
 -16 -1 13 10.2 3.84
 -16 1 13 0.81 3.08
 16 1 -12 2.7 2.48
 16 -1 -12 -6.7 2.63
 -16 -1 12 -0.26 2.33
 -16 1 12 0.01 4.43
 16 1 -11 2.29 2.34
 16 -1 -11 0.8 2.53
 -16 -1 11 -2.56 3.6
 -16 1 11 -0.72 2.92
 16 -1 -10 -2.55 2.39
 16 1 -10 -0.95 2.25
 -16 -1 10 1.37 2.33
 -16 1 10 8.43 4.31
 16 1 -9 0.78 3.43
 16 -1 -9 9.22 3.79
 -16 -1 9 1.26 3.76
 -16 1 9 1.72 2.82
 16 1 -8 -2.6 3.2
 16 -1 -8 -0.56 2.46
 -16 -1 8 0.89 2.24
 -16 1 8 3.69 2.69
 16 1 -7 -0.98 3.06
 16 -1 -7 -5.14 2.35
 -16 -1 7 2.13 2.3
 -16 1 7 3.59 2.64
 16 -1 -6 1.63 2.39
 16 1 -6 0.2 3.01
 -16 -1 6 4.59 2.23
 -16 1 6 -0.7 2.66
 16 1 -5 11.03 2.06
 16 -1 -5 6.82 2.41
 -16 -1 5 1.4 2.57
 -16 1 5 3.84 2.91
 16 1 -4 0.14 1.79
 16 -1 -4 0.4 3.43
 -16 -1 4 1.76 3.58
 -16 1 4 0.83 2.71
 16 1 -3 3.09 1.74
 16 -1 -3 1.68 2.29
 -16 -1 3 2.73 2.53
 -16 1 3 6.48 2.84
 16 1 -2 1.55 1.58
 16 -1 -2 2.59 2.16
 -16 -1 2 -1.43 2.53
 -16 1 2 2.06 2.78
 16 1 -1 3.33 2.31
 16 -1 -1 0.37 2.13
 -16 -1 1 -1.22 2.57
 -16 1 1 8.84 4.11
 16 -1 0 2.13 2.09
 16 1 0 1.17 2.1
 -16 -1 0 0.57 3.94
 -16 1 0 2.71 2.83
 16 1 1 5.36 2.14
 16 -1 1 9.8 3.44
 -16 1 -1 11.93 3.11
 -16 -1 -1 6.61 2.92
 16 -1 2 1.15 1.89
 -16 1 -2 1.93 2.93
 -16 -1 -2 3.11 2.71
 16 -1 3 3.68 1.87
 -16 -1 -3 1.41 2.87
 -16 1 -3 -1.86 4.54
 16 -1 4 -1.33 1.78
 -16 -1 -4 3.96 2.83
 -16 1 -4 0.67 2.92
 16 -1 5 2.21 1.68
 -16 -1 -5 -2.76 4.59
 -16 1 -5 1.37 2.94
 16 -1 6 -1.01 2.54
 -16 -1 -6 0 3.02
 -16 1 -6 6.58 2.96
 -16 -1 -7 1.02 3.12
 -16 1 -7 -3.52 3
 -16 -1 -8 4.53 3.26
 -16 1 -8 5.73 3.27
 -16 -1 -9 0.81 3.31
 -16 1 -9 3.62 3.13
 -16 1 -10 -1.32 4.83
 -16 1 -10 2.9 5.17
 -16 -1 -10 4.96 3.46
 -16 -1 -11 0.12 3.39
 -16 1 -11 -1.93 3.34
 -16 -1 -12 -1.42 3.4
 -16 1 -12 0.5 3.34
 -16 -1 -13 0.07 3.52
 -16 1 -13 5.01 3.5
 -16 1 -14 5.9 3.71
 -16 -1 -14 5.32 3.85
 -16 -1 -15 0.45 3.66
 -16 1 -15 3.7 3.57
 -16 -1 -16 10.18 3.95
 -16 1 -16 0.79 3.89
 -16 -1 -17 1.64 3.94
 -16 1 -17 2.34 3.68
 -16 1 -18 1.39 3.64
 -16 -1 -18 -1.01 3.86
 -16 -1 -19 -0.7 3.95
 -16 1 -19 -0.57 3.77
 16 -2 -28 -6.95 4.29
 16 -2 -27 5.78 6.23
 16 -2 -26 3.08 3.77
 16 -2 -25 -1.28 3.64
 16 -2 -24 7.62 3.69
 -16 2 24 2.34 6.3
 16 -2 -23 -1.16 5.35
 -16 2 23 3.57 3.78
 16 -2 -22 4.44 3.39
 -16 2 22 -1.17 3.77
 16 2 -21 1.03 3.24
 16 -2 -21 1.46 3.3
 -16 2 21 -2.56 3.76
 16 2 -20 -8.16 3.27
 16 -2 -20 4.01 3.31
 -16 2 20 -2.08 3.87
 16 2 -19 0.72 3.17
 16 -2 -19 4.04 4.74
 -16 2 19 -0.96 3.75
 16 2 -18 -6.33 3.16
 16 -2 -18 4.44 3.12
 -16 2 18 -2.99 3.58
 16 2 -17 2.22 2.97
 16 -2 -17 7.07 3.24
 -16 2 17 2.45 3.69
 16 -2 -16 -2.95 3.1
 16 2 -16 3.18 2.93
 -16 -2 16 5.36 3.48
 -16 2 16 7.11 3.58
 16 2 -15 4.28 2.74
 16 -2 -15 10.17 4.57
 -16 -2 15 -0.39 2.02
 -16 2 15 4.29 3.58
 16 -2 -14 2.75 3.05
 16 2 -14 4.14 2.73
 -16 -2 14 -2.1 2.06
 -16 2 14 10.07 5.29
 16 2 -13 -4.09 2.6
 16 -2 -13 6.78 2.88
 -16 -2 13 -1.06 3.07
 -16 2 13 3.64 3.4
 16 -2 -12 12.41 3.22
 16 2 -12 -2.04 2.81
 -16 -2 12 15.21 2.43
 -16 2 12 3.83 5.61
 16 2 -11 7.13 2.44
 16 -2 -11 1.52 4.42
 -16 -2 11 0.68 2.05
 -16 2 11 -0.98 3.35
 16 2 -10 -0.33 2.23
 16 -2 -10 -1.89 2.72
 -16 -2 10 0.35 2.05
 -16 2 10 2.88 3.16
 16 2 -9 0.89 2.17
 16 -2 -9 0.64 2.79
 -16 -2 9 -0.94 2.02
 -16 2 9 -3.07 3.17
 16 -2 -8 2.36 2.65
 16 2 -8 2.04 2.1
 -16 -2 8 0.74 2.09
 -16 2 8 -0.94 3.04
 16 2 -7 -4.59 2.03
 16 -2 -7 2.81 4.01
 -16 -2 7 0.48 2.25
 -16 2 7 1.58 3.19
 16 -2 -6 -1.29 2.58
 16 2 -6 3.76 1.88
 -16 -2 6 1.73 2.3
 -16 2 6 4.41 3.04
 16 2 -5 0 1.79
 16 -2 -5 3.42 2.54
 -16 -2 5 5.61 3.68
 -16 2 5 3.36 3.1
 16 -2 -4 7.55 2.68
 16 2 -4 9.78 1.85
 -16 -2 4 5.03 2.5
 -16 2 4 8.24 3.26
 16 2 -3 2.52 1.56
 16 -2 -3 7.37 3.75
 -16 -2 3 3.98 2.48
 -16 2 3 1.31 3.07
 16 2 -2 -0.27 1.42
 16 -2 -2 1.69 2.45
 -16 -2 2 6.05 3.78
 -16 2 2 4.56 2.99
 16 -2 -1 -0.24 2.4
 -16 -2 1 0.68 2.61
 -16 2 1 5.34 3.04
 16 -2 0 2.79 2.43
 -16 -2 0 7.19 2.87
 -16 2 0 8.21 4.97
 16 -2 1 8.13 3.75
 -16 2 -1 5.85 3.15
 -16 -2 -1 -0.54 2.82
 16 -2 2 3.86 3.52
 -16 -2 -2 -0.1 2.79
 -16 2 -2 -3.3 3.06
 16 -2 3 7.54 2.58
 -16 -2 -3 9.56 5.04
 -16 2 -3 9.21 3.61
 16 -2 4 -0.64 2.27
 -16 -2 -4 3.79 4.55
 -16 2 -4 6.4 3.35
 16 -2 5 6.13 2.38
 -16 -2 -5 1.35 3.29
 -16 2 -5 12.6 5.57
 16 -2 6 2.3 3.35
 -16 -2 -6 -2.57 3.04
 -16 2 -6 8.06 5.02
 16 -2 7 0.53 2.21
 -16 -2 -7 4.95 3.08
 -16 2 -7 2.34 3.37
 16 -2 8 -0.97 2.32
 -16 -2 -8 -4.76 3.2
 -16 2 -8 -0.89 3.32
 -16 2 -9 -4.22 3.41
 -16 -2 -9 -0.79 3.23
 -16 -2 -10 -0.05 3.33
 -16 2 -10 -3.99 3.37
 -16 -2 -11 3.98 3.5
 -16 2 -11 6.14 3.54
 -16 -2 -12 0.73 3.52
 -16 2 -12 6.34 3.56
 -16 -2 -13 0.94 3.62
 -16 2 -13 6.84 3.62
 -16 -2 -14 0.05 3.46
 -16 2 -14 0.77 5.24
 -16 -2 -15 3.3 3.58
 -16 2 -15 -2.14 5.58
 -16 -2 -16 6.28 3.91
 -16 2 -16 -1.44 5.7
 -16 -2 -17 -1.6 3.81
 -16 2 -17 11.92 5.62
 -16 -2 -18 0.3 3.8
 -16 2 -18 -2.87 5.57
 -16 -2 -19 3.04 4.18
 -16 2 -19 6.44 6.05
 16 -3 -27 -2.08 4.01
 16 -3 -26 -0.61 3.82
 -16 3 26 -0.55 4.53
 16 -3 -25 -6.42 3.86
 -16 3 25 5.54 4.56
 16 -3 -24 5.78 3.89
 -16 3 24 3.91 4.76
 16 -3 -23 5.14 5.41
 -16 3 23 0.7 4.34
 16 -3 -22 -0.09 3.33
 -16 3 22 6.33 4.35
 16 -3 -21 1.3 3.55
 -16 3 21 6.57 4.31
 16 -3 -20 -2.96 3.44
 -16 3 20 -4.9 4.42
 16 -3 -19 -5.24 5.18
 -16 3 19 1.16 6.33
 16 -3 -18 0.29 3.4
 -16 3 18 -1.83 4.09
 16 -3 -17 2.47 3.37
 -16 3 17 1.43 6.2
 16 -3 -16 8.17 3.55
 -16 3 16 5.85 4.21
 16 -3 -15 5.34 5.49
 -16 3 15 5.16 4.07
 16 -3 -14 7.38 3.51
 -16 3 14 3.95 6.48
 16 -3 -13 0.34 3.23
 -16 -3 13 1.56 1.67
 -16 3 13 -1.14 3.78
 16 -3 -12 5.23 3.35
 -16 3 12 4.08 4
 -16 -3 12 6.78 2.86
 16 -3 -11 6.21 3.12
 -16 -3 11 0.69 1.9
 -16 3 11 7.45 3.79
 16 -3 -10 0.44 3.07
 -16 -3 10 3.15 3.1
 -16 3 10 1.74 3.65
 16 -3 -9 1.47 3.02
 -16 -3 9 2.01 2.07
 -16 3 9 3.84 5.76
 16 -3 -8 2.89 4.49
 -16 3 8 1.11 3.48
 -16 -3 8 -2.22 3.16
 16 -3 -7 3.23 3.1
 -16 -3 7 1.68 2.19
 -16 3 7 2.39 3.47
 16 -3 -6 1.38 2.99
 -16 -3 6 0.04 2.25
 -16 3 6 2.74 5.25
 16 -3 -5 -1.85 3.04
 -16 -3 5 -0.31 2.37
 -16 3 5 5.77 3.42
 16 -3 -4 2.24 4.74
 -16 -3 4 2.46 2.52
 -16 3 4 1.1 3.42
 16 -3 -3 1.19 3.26
 -16 -3 3 -2.5 2.59
 -16 3 3 1.47 3.44
 16 -3 -2 1.32 3.39
 -16 -3 2 3.41 3.99
 -16 3 2 -0.2 5.16
 16 -3 -1 5.06 3.6
 -16 -3 1 0.72 2.77
 -16 3 1 8.4 3.51
 16 -3 0 -0.91 5.18
 -16 3 0 5.21 3.43
 -16 -3 0 -1.11 2.77
 16 -3 1 -1.92 3.5
 -16 -3 -1 2.26 2.89
 -16 3 -1 3.8 3.43
 16 -3 2 5.34 3.52
 -16 -3 -2 -2.19 2.91
 -16 3 -2 5.95 5.29
 16 -3 3 3.89 3.86
 -16 -3 -3 6.36 4.84
 -16 3 -3 4.5 3.76
 16 -3 4 4.14 5.65
 -16 3 -4 3.86 3.37
 -16 -3 -4 -3.64 3.04
 16 -3 5 3.71 5.92
 -16 -3 -5 -0.38 3.11
 -16 3 -5 0.55 3.47
 16 -3 6 1.89 3.98
 -16 -3 -6 3.23 3.2
 -16 3 -6 -1.97 3.57
 16 -3 7 3.52 4.06
 -16 -3 -7 0.25 3.24
 -16 3 -7 0.1 3.49
 16 -3 8 4.88 4.29
 -16 -3 -8 -0.17 3.29
 -16 3 -8 2.97 5.53
 16 -3 9 4.2 6.64
 -16 -3 -9 0.03 3.3
 -16 3 -9 2.69 5.57
 16 -3 10 -0.59 6.61
 -16 -3 -10 1.65 3.39
 -16 3 -10 1.73 3.69
 -16 -3 -11 0.69 3.52
 -16 3 -11 6.81 3.7
 -16 -3 -12 -0.32 3.49
 -16 3 -12 2.06 3.68
 -16 -3 -13 -2.87 3.55
 -16 3 -13 -0.08 3.7
 -16 -3 -14 -1.52 3.62
 -16 3 -14 0.31 3.67
 -16 -3 -15 5.78 4.1
 -16 3 -15 3.97 4.04
 -16 3 -16 -0.53 3.88
 -16 -3 -16 2.99 3.94
 -16 -3 -17 4.94 4
 -16 3 -17 -0.09 3.99
 16 -4 -24 -0.69 3.91
 -16 4 24 1.29 4.96
 16 -4 -23 -0.45 3.8
 -16 4 23 -1.69 4.88
 16 -4 -22 10.36 6.21
 -16 4 22 -2.21 4.58
 16 -4 -21 7.55 4.11
 -16 4 21 0.7 4.91
 16 -4 -20 1.99 3.97
 -16 4 20 10.24 7.41
 16 -4 -19 0.47 3.77
 -16 4 19 2.18 4.51
 16 -4 -18 -1.02 3.7
 -16 4 18 3.02 4.4
 16 -4 -17 -2.55 3.68
 -16 4 17 3.87 6.77
 16 -4 -16 1.25 3.72
 -16 4 16 3.52 4.5
 16 -4 -15 14.07 6.36
 -16 4 15 6.53 4.72
 16 -4 -14 0.27 3.63
 -16 4 14 -0.08 4.08
 16 -4 -13 6.07 3.64
 -16 4 13 -11.47 4.13
 16 -4 -12 -2.32 3.52
 -16 4 12 2.98 4.06
 16 -4 -11 3.3 6.13
 -16 4 11 3.2 4.32
 16 -4 -10 -3.82 3.78
 -16 -4 10 0.28 1.89
 -16 4 10 0.83 3.89
 16 -4 -9 -0.66 3.91
 -16 -4 9 -1.19 1.95
 -16 4 9 0.07 3.94
 16 -4 -8 0.49 3.84
 -16 4 8 7.55 3.93
 -16 -4 8 -0.44 2.27
 16 -4 -7 -1.87 6.26
 -16 -4 7 0.79 2.29
 -16 4 7 3.54 4.01
 16 -4 -6 -1.56 4.08
 -16 -4 6 1.85 3.68
 -16 4 6 3.45 3.92
 16 -4 -5 -2.78 4.12
 -16 -4 5 0.91 2.38
 -16 4 5 -0.77 5.9
 16 -4 -4 8.48 4.53
 -16 4 4 4.73 3.99
 -16 -4 4 2.56 2.6
 16 -4 -3 -3.29 4.2
 -16 -4 3 3.23 2.58
 -16 4 3 -3.4 3.87
 16 -4 -2 -3.11 4.36
 -16 -4 2 -2.22 4.19
 -16 4 2 -1.28 3.89
 16 -4 -1 -2.16 4.33
 -16 -4 1 2.7 2.77
 -16 4 1 1.88 6.16
 16 -4 0 2.27 4.52
 -16 -4 0 -0.19 2.89
 -16 4 0 4.77 3.8
 16 -4 1 5.13 7.5
 -16 -4 -1 4.23 3.04
 -16 4 -1 5.02 3.97
 16 -4 2 -2.53 4.95
 -16 -4 -2 4.54 3.03
 -16 4 -2 8.62 3.95
 16 -4 3 -1.48 4.79
 -16 -4 -3 3.28 4.69
 -16 4 -3 0.27 3.82
 16 -4 4 4.29 5.05
 -16 4 -4 3.1 6.27
 16 -4 5 10.8 7.87
 -16 4 -5 3.66 3.88
 -16 -4 -5 1.76 5.39
 16 -4 6 -1.61 5.03
 -16 -4 -6 -3.14 3.47
 -16 4 -6 0.18 3.78
 16 -4 7 2.38 5.18
 -16 -4 -7 3.53 3.58
 -16 4 -7 3.91 3.86
 16 -4 8 6.57 5.2
 -16 -4 -8 0.86 3.67
 -16 4 -8 6.82 3.96
 16 -4 9 5.15 4.86
 -16 4 -9 -3.21 3.83
 -16 -4 -9 3.56 3.64
 16 -4 10 -0.44 7.58
 -16 -4 -10 6.07 3.69
 -16 4 -10 0.42 4
 -16 -4 -11 1.45 3.86
 -16 4 -11 5.35 6.12
 -16 -4 -12 3.85 3.74
 -16 4 -12 -10.34 6.02
 -16 4 -13 -2.6 6.07
 -16 -4 -13 0.05 3.93
 -16 -4 -14 -0.21 3.99
 -16 4 -14 -1.75 3.99
 -16 -4 -15 2.63 4.02
 -16 4 -15 -1.93 4.03
 16 -5 -21 18.29 7.83
 -16 5 21 4.18 9.18
 16 -5 -20 -1.48 4.38
 -16 5 20 3.58 5
 16 -5 -19 -1.13 4.33
 -16 5 19 1.5 4.91
 16 -5 -18 -0.24 4.39
 -16 5 18 4.61 7.56
 16 -5 -17 7.87 7.15
 -16 5 17 4.44 5.22
 16 -5 -16 -3.42 4.48
 -16 5 16 -3.66 5.01
 16 -5 -15 1.59 4.4
 -16 5 15 7.95 7.72
 16 -5 -14 -1.49 6.58
 -16 5 14 1.37 4.69
 16 -5 -13 8.39 4.69
 -16 5 13 0.68 4.91
 16 -5 -12 10.12 5.03
 -16 5 12 11.23 7.89
 16 -5 -11 0.46 4.6
 -16 5 11 6.45 4.51
 16 -5 -10 1.3 7.31
 -16 5 10 -6.45 4.59
 16 -5 -9 11.55 5.28
 -16 5 9 5.61 4.7
 16 -5 -8 -0.68 4.86
 -16 -5 8 -0.93 2.34
 -16 5 8 -4.36 6.77
 16 -5 -7 6.84 5.07
 -16 -5 7 0.81 2.28
 -16 5 7 -3.64 4.3
 16 -5 -6 -4.62 7.68
 -16 -5 6 -3.87 3.9
 -16 5 6 -1.6 4.36
 16 -5 -5 -6.53 4.92
 -16 -5 5 -1.22 2.6
 -16 5 5 1.77 4.35
 16 -5 -4 3.52 4.91
 -16 -5 4 -1.71 2.6
 -16 5 4 3.23 6.43
 16 -5 -3 -6.17 5.22
 -16 5 3 -2.83 4.26
 -16 -5 3 -1.49 2.75
 16 -5 -2 -1.54 7.79
 -16 -5 2 2.13 4.42
 -16 5 2 -0.32 4.17
 16 -5 -1 2.68 5.31
 -16 -5 1 -0.38 4.65
 -16 5 1 -2.63 4.17
 16 -5 0 -1.1 5.42
 -16 -5 0 1.84 3.13
 -16 5 0 5.28 6.57
 16 -5 1 2.79 5.67
 -16 -5 -1 4.12 3.47
 -16 5 -1 9.03 6.8
 16 -5 2 8.15 8.3
 -16 -5 -2 -3.15 3.3
 -16 5 -2 2.29 4.1
 16 -5 3 -4.69 8.61
 -16 -5 -3 0.24 3.35
 -16 5 -3 3.97 4.06
 16 -5 4 3.47 5.69
 -16 -5 -4 -1.92 3.56
 -16 5 -4 -7.51 4.26
 16 -5 5 0.42 5.6
 -16 5 -5 -0.87 4.21
 -16 -5 -5 4.37 3.58
 16 -5 6 7.17 5.62
 -16 -5 -6 0.43 3.66
 -16 5 -6 5.14 6.68
 16 -5 7 -2.9 5.7
 -16 -5 -7 2.87 5.76
 -16 5 -7 10.35 6.58
 -16 -5 -8 1.86 5.73
 -16 5 -8 -0.05 4.23
 -16 -5 -9 1.23 5.92
 -16 5 -9 0.05 4.3
 -16 -5 -10 1.23 6.01
 -16 5 -10 0.94 4.35
 -16 -5 -11 -4.83 6.2
 -16 5 -11 4.12 4.46
 -16 -5 -12 1.6 6.27
 -16 5 -12 0.11 4.35
 16 -6 -16 -1.65 5.33
 -16 6 16 -7.67 5.55
 16 -6 -15 -6.35 8.06
 -16 6 15 5.65 5.2
 16 -6 -14 -4.11 5.15
 -16 6 14 6.33 5.21
 16 -6 -13 3.76 5.27
 -16 6 13 4.48 5.21
 16 -6 -12 10.68 8.69
 -16 6 12 3.59 8.38
 16 -6 -11 6.6 5.87
 -16 6 11 4.51 5.3
 16 -6 -10 -5.35 5.45
 -16 6 10 2.31 4.98
 16 -6 -9 -5.3 5.53
 -16 6 9 2.75 4.87
 16 -6 -8 -27.82 9.32
 -16 6 8 7.02 8.31
 16 -6 -7 1.92 5.39
 -16 6 7 -2.21 4.67
 16 -6 -6 -4.16 5.56
 -16 6 6 -1.34 4.84
 16 -6 -5 -1.21 5.64
 -16 -6 5 3.68 4.42
 -16 6 5 1.64 4.89
 16 -6 -4 25.76 9.82
 -16 -6 4 12.52 5.26
 -16 6 4 5.82 5.38
 16 -6 -3 -3.08 5.81
 -16 -6 3 -1.74 3.12
 -16 6 3 -3.02 7.42
 16 -6 -2 3.67 6.11
 -16 -6 2 6.79 3.4
 -16 6 2 6.93 5.01
 16 -6 -1 -0.06 5.8
 -16 -6 1 0.68 3.24
 -16 6 1 -7.54 4.76
 16 -6 0 1.04 6.02
 -16 -6 0 3.64 3.54
 -16 6 0 7.87 4.84
 16 -6 1 8.48 9.9
 -16 -6 -1 4.75 5.75
 -16 6 -1 6.41 5.04
 16 -6 2 4.1 6.54
 -16 -6 -2 12.2 6.21
 -16 6 -2 11.57 8.01
 16 -6 3 5.19 6.37
 -16 -6 -3 4.67 3.82
 -16 6 -3 5.63 5.08
 16 -6 4 3.52 5.86
 -16 -6 -4 -1.08 3.65
 -16 6 -4 -0.35 4.72
 16 -6 5 -2.33 5.68
 -16 -6 -5 -2.55 3.79
 -16 6 -5 4.46 4.84
 16 -6 6 6.78 8.67
 -16 -6 -6 -3.13 3.91
 -16 6 -6 4.59 4.92
 17 0 -28 1.95 4.13
 17 0 -27 2.25 4.05
 17 0 -26 1.68 6.15
 17 0 -25 1.44 5.8
 17 0 -24 0.31 3.6
 17 0 -23 0.35 3.58
 17 0 -22 -0.08 3.4
 17 0 -21 1.34 3.46
 17 0 -20 8.56 5.7
 17 0 -19 2.14 3.18
 -17 0 19 3.07 3
 17 0 -18 -1.25 3.13
 -17 0 18 5.1 4.6
 17 0 -17 3.27 3.17
 -17 0 17 3.17 3.07
 17 0 -16 1.31 3.01
 -17 0 16 -0.95 2.81
 17 0 -15 4.85 2.92
 -17 0 15 -4.71 2.95
 17 0 -14 9.08 4.92
 -17 0 14 12.42 3.37
 17 0 -13 5.49 2.79
 -17 0 13 -1.02 2.99
 17 0 -12 4.74 2.71
 -17 0 12 -1.22 2.77
 17 0 -11 1.83 2.49
 -17 0 11 -1.84 2.73
 17 0 -10 1.84 2.39
 -17 0 10 -3.72 2.77
 17 0 -9 0.36 2.49
 -17 0 9 2.2 2.71
 17 0 -8 3.45 3.85
 -17 0 8 4.03 4.47
 17 0 -7 0.05 3.37
 -17 0 7 2.74 2.87
 17 0 -6 13.89 2.64
 -17 0 6 12.53 3.3
 17 0 -5 0.82 2.15
 -17 0 5 -0.14 4.1
 17 0 -4 0.53 2
 -17 0 4 -0.83 2.65
 17 0 -3 -0.09 1.92
 -17 0 3 0.07 2.74
 17 0 -2 5.51 2
 -17 0 2 0.44 4.59
 17 0 -1 1.82 1.77
 -17 0 1 -3.76 2.65
 17 0 0 11.69 2.85
 -17 0 0 4.76 3.19
 17 0 1 0.53 2.43
 -17 0 -1 2.05 2.79
 17 0 2 4.02 2.41
 -17 0 -2 1.52 2.93
 -17 0 -3 3.49 4.9
 -17 0 -4 2.98 3.26
 -17 0 -5 1.66 3.17
 -17 0 -6 1.46 3.29
 -17 0 -7 2.06 3.29
 -17 0 -8 1.94 3.44
 -17 0 -9 2.17 5.28
 -17 0 -10 3.26 5.35
 -17 0 -11 2.88 5.15
 -17 0 -12 6.72 3.72
 -17 0 -13 -0.3 3.39
 -17 0 -14 2.65 3.65
 -17 0 -15 2.86 3.73
 -17 0 -16 1.42 3.76
 -17 0 -17 -0.6 3.75
 -17 0 -18 0.34 3.85
 17 1 -28 0.01 4
 17 -1 -28 1.77 4.1
 17 1 -27 -5.96 3.9
 17 -1 -27 5.4 3.89
 17 1 -26 1.19 4.01
 17 -1 -26 2.98 6.01
 17 -1 -25 -5.23 3.8
 17 1 -25 2.87 3.8
 17 1 -24 -5.98 5.69
 17 -1 -24 -0.6 3.63
 17 1 -23 -2.68 3.5
 17 -1 -23 4.16 3.6
 17 1 -22 -2.9 3.44
 17 -1 -22 0.21 5.31
 17 -1 -21 2.06 3.47
 17 1 -21 6.49 3.46
 -17 1 21 0.99 3.54
 17 1 -20 -3.46 3.42
 17 -1 -20 -4.64 3.38
 -17 1 20 -0.51 5.55
 17 1 -19 5.53 3.32
 17 -1 -19 4.23 3.38
 -17 1 19 1.21 3.54
 17 1 -18 9 3.17
 17 -1 -18 1.02 3.23
 -17 1 18 -2.6 3.54
 17 -1 -17 6.67 5.12
 17 1 -17 -0.24 5.1
 -17 -1 17 8.97 2.76
 -17 1 17 3.56 3.62
 17 1 -16 13.42 4.57
 17 -1 -16 0.53 3.21
 -17 -1 16 3.46 4.1
 -17 1 16 0.6 3.49
 17 1 -15 1.87 2.9
 17 -1 -15 -1.7 3.03
 -17 -1 15 5.45 2.59
 -17 1 15 4.02 3.5
 17 1 -14 5.05 2.9
 17 -1 -14 2 3.01
 -17 -1 14 0.14 2.52
 -17 1 14 2.21 3.23
 17 -1 -13 2.88 2.9
 17 1 -13 0.7 2.68
 -17 -1 13 0.3 3.75
 -17 1 13 3.97 3.21
 17 1 -12 6.82 2.74
 17 -1 -12 -3.62 4.67
 -17 -1 12 6.12 2.65
 -17 1 12 2.64 3.3
 17 1 -11 1.62 2.51
 17 -1 -11 -0.13 2.8
 -17 -1 11 7.2 3.92
 -17 1 11 3.54 3.18
 17 1 -10 1.78 2.41
 17 -1 -10 -2.64 2.63
 -17 -1 10 2.42 2.6
 -17 1 10 -4.34 4.74
 17 -1 -9 -2.14 2.53
 17 1 -9 -2.62 2.34
 -17 -1 9 1.61 2.55
 -17 1 9 5.9 3.05
 17 1 -8 -3.57 2.32
 17 -1 -8 2.66 2.59
 -17 -1 8 -2.34 2.54
 -17 1 8 -1.69 2.97
 17 1 -7 5.37 3.31
 17 -1 -7 -0.72 3.88
 -17 -1 7 0.16 2.55
 -17 1 7 -1.19 4.63
 17 1 -6 5.38 3.15
 17 -1 -6 3.09 2.64
 -17 -1 6 -2.09 4.06
 -17 1 6 0.52 3.06
 17 1 -5 0.82 3
 17 -1 -5 -0.49 2.5
 -17 -1 5 -1.55 2.62
 -17 1 5 -4.9 2.97
 17 1 -4 -2.91 2.84
 17 -1 -4 -1.25 2.37
 -17 -1 4 2.58 2.48
 -17 1 4 -6.14 4.54
 17 -1 -3 0.7 2.23
 17 1 -3 2.99 2.68
 -17 -1 3 -3.03 4.03
 -17 1 3 0.7 3.05
 17 1 -2 0.03 2.52
 17 -1 -2 -0.66 3.48
 -17 -1 2 -2.43 2.68
 -17 1 2 6.97 3.08
 17 -1 -1 1.94 3.53
 17 1 -1 5.71 2.49
 -17 -1 1 1.76 3.01
 -17 1 1 5.8 3.19
 17 -1 0 0.29 2.18
 -17 -1 0 4.24 2.87
 -17 1 0 0.3 3.04
 17 -1 1 1.46 2.15
 -17 -1 -1 -2.29 4.73
 -17 1 -1 12.48 3.24
 17 -1 2 0.33 1.98
 -17 -1 -2 1.38 2.9
 -17 1 -2 5.34 3.07
 17 -1 3 2.16 1.88
 -17 -1 -3 3.33 2.93
 -17 1 -3 -4.04 3.14
 17 -1 4 1.12 2.93
 -17 -1 -4 1.45 3.11
 -17 1 -4 5.82 4.94
 -17 -1 -5 1.8 3.07
 -17 1 -5 0.86 4.86
 -17 1 -6 9.54 3.28
 -17 -1 -6 -1.79 3.28
 -17 -1 -7 3.77 3.23
 -17 1 -7 1.85 3.21
 -17 -1 -8 3.82 4.86
 -17 1 -8 -1.64 3.18
 -17 -1 -9 4.64 5.57
 -17 1 -9 4.2 3.33
 -17 1 -10 1.14 3.26
 -17 -1 -10 0.68 3.43
 -17 1 -11 -4.01 3.39
 -17 -1 -11 -0.76 3.53
 -17 -1 -12 6.02 3.58
 -17 1 -12 -1.37 3.35
 -17 -1 -13 1.21 3.58
 -17 1 -13 -4.67 5.23
 -17 -1 -14 -0.82 3.85
 -17 1 -14 6.83 5.58
 -17 1 -14 4.1 5.68
 -17 -1 -15 -5.65 4.02
 -17 1 -15 -0.7 5.99
 -17 -1 -16 -2.04 3.8
 -17 1 -16 2.58 5.83
 -17 -1 -17 2.76 4.29
 -17 1 -17 6.79 4.06
 17 -2 -27 5.25 4.22
 17 -2 -26 -4.33 6.38
 17 -2 -25 -1.09 3.73
 17 -2 -24 -2.75 3.87
 17 -2 -23 6.9 3.75
 -17 2 23 -2.49 6.55
 17 -2 -22 3.66 5.47
 -17 2 22 -0.78 3.92
 17 2 -21 -7.2 3.53
 17 -2 -21 2.38 3.44
 -17 2 21 -5.45 6.36
 17 2 -20 2.35 3.43
 17 -2 -20 4.73 3.52
 -17 2 20 2.45 3.95
 17 2 -19 -5.72 3.29
 17 -2 -19 0.17 3.4
 17 2 -18 4.43 3.05
 17 -2 -18 -1.09 5.16
 -17 2 18 -1.45 3.76
 17 -2 -17 3.17 3.25
 17 2 -17 3.55 3.11
 -17 2 17 7.27 5.94
 17 2 -16 7.83 3.11
 17 -2 -16 4.08 3.26
 -17 2 16 0.53 3.94
 17 2 -15 4.4 2.92
 17 -2 -15 0.45 3.17
 -17 -2 15 2.72 2.3
 -17 2 15 3.61 3.74
 17 2 -14 14.49 2.99
 17 -2 -14 15.27 5.19
 -17 -2 14 4.31 2.25
 -17 2 14 9.53 4.09
 17 2 -13 4.85 2.67
 17 -2 -13 -2.19 3.16
 -17 -2 13 3.42 3.18
 -17 2 13 -0.25 3.67
 17 -2 -12 -5.14 2.97
 17 2 -12 -1.12 2.61
 -17 -2 12 -1.89 2.18
 -17 2 12 6.69 5.46
 17 2 -11 0.38 2.41
 17 -2 -11 1.22 2.85
 -17 -2 11 1.84 3.21
 -17 2 11 -0.51 3.48
 17 2 -10 5.29 2.38
 17 -2 -10 2.8 4.46
 -17 -2 10 -2.29 2.17
 -17 2 10 1.16 3.35
 17 2 -9 -6.2 2.26
 17 -2 -9 0.34 4.5
 -17 -2 9 -0.02 3.55
 -17 2 9 1.61 3.5
 17 -2 -8 6.51 2.92
 17 2 -8 4.98 2.24
 -17 -2 8 -0.04 2.4
 -17 2 8 2 3.5
 17 2 -7 1.65 2.09
 17 -2 -7 1.87 2.87
 -17 -2 7 2.51 2.35
 -17 2 7 1.96 3.42
 17 -2 -6 3.87 2.74
 17 2 -6 -3.65 1.98
 -17 -2 6 0.97 2.42
 -17 2 6 3.64 3.22
 17 2 -5 2.4 1.93
 17 -2 -5 2.67 4.34
 -17 -2 5 8.99 2.76
 -17 2 5 3.54 3.35
 17 -2 -4 -2.19 2.65
 17 2 -4 4.45 1.7
 -17 -2 4 -3.69 4.17
 -17 2 4 4.74 3.34
 17 2 -3 0.29 1.68
 17 -2 -3 10.05 2.7
 -17 -2 3 4.56 2.72
 -17 2 3 7.26 5.16
 17 -2 -2 1.8 2.47
 -17 -2 2 -1.75 2.72
 -17 2 2 -0.59 3.25
 17 -2 -1 21.24 4.5
 -17 -2 1 10.65 3.45
 -17 2 1 20.52 4.13
 17 -2 0 -0.28 3.79
 -17 -2 0 4.53 4.29
 -17 2 0 -1.81 3.25
 17 -2 1 1.07 2.37
 -17 -2 -1 2.2 3.07
 -17 2 -1 0.29 5.26
 17 -2 2 1.72 2.33
 -17 2 -2 4.03 3.45
 -17 -2 -2 3.18 3.1
 17 -2 3 0.92 2.26
 -17 -2 -3 2.1 3.12
 -17 2 -3 1.22 3.37
 17 -2 4 -1.64 3.45
 -17 -2 -4 1.34 3.1
 -17 2 -4 -0.1 3.43
 17 -2 5 3.02 3.5
 -17 -2 -5 -3.15 3.35
 -17 2 -5 -3.65 3.43
 17 -2 6 -0.49 2.19
 -17 2 -6 2.75 5.34
 -17 -2 -6 2.05 3.32
 -17 -2 -7 6.6 5.28
 -17 2 -7 1.6 5.33
 -17 -2 -8 4.71 5.53
 -17 2 -8 7.37 3.6
 -17 -2 -9 0.89 3.41
 -17 2 -9 5.1 3.57
 -17 -2 -10 1.31 3.45
 -17 2 -10 0.57 3.43
 -17 -2 -11 1.51 3.5
 -17 2 -11 1.19 3.57
 -17 -2 -12 1.91 3.51
 -17 2 -12 -0.19 3.6
 -17 -2 -13 0.62 3.66
 -17 2 -13 2.16 3.74
 -17 -2 -14 0.46 3.97
 -17 2 -14 10.42 3.9
 -17 -2 -15 6.99 4
 -17 2 -15 3.27 3.98
 -17 -2 -16 0.12 4
 -17 2 -16 2.8 3.92
 17 -3 -25 -7.14 4.05
 -17 3 25 -0.61 5.07
 17 -3 -24 2.33 3.92
 -17 3 24 6.16 7.22
 17 -3 -23 -1.58 3.94
 -17 3 23 -7.48 4.64
 17 -3 -22 10.22 6.06
 -17 3 22 0.83 7.35
 17 -3 -21 -0.52 3.43
 -17 3 21 -0.9 4.29
 17 -3 -20 -2.36 3.46
 -17 3 20 1.21 4.28
 17 -3 -19 5.05 3.54
 -17 3 19 4.58 4.53
 17 -3 -18 5.64 5.57
 -17 3 18 1.21 4.36
 17 -3 -17 6.23 3.64
 -17 3 17 3.5 6.84
 17 -3 -16 5.07 3.48
 -17 3 16 -4.41 4
 17 -3 -15 -1.03 3.31
 -17 3 15 9.21 6.17
 17 -3 -14 -1.85 5.31
 -17 3 14 5.75 4.03
 17 -3 -13 4.87 3.47
 -17 3 13 1.09 4.03
 17 -3 -12 3.49 3.26
 -17 -3 12 0.76 1.98
 -17 3 12 3.31 6.01
 17 -3 -11 1.03 3.37
 -17 -3 11 3.99 1.98
 -17 3 11 0.68 3.99
 17 -3 -10 5.21 4.97
 -17 -3 10 1.09 2.07
[truncated: 47,943 more chars]
